# Supplementary material for: Integrative transcriptomic analysis of tissue-specific metabolic crosstalk after myocardial infarction
Source: eLife journal article supplement (doi:10.7554/elife.66921), 2021-05-10
Supplement: supp [file elife-66921-supp-v1.zip]

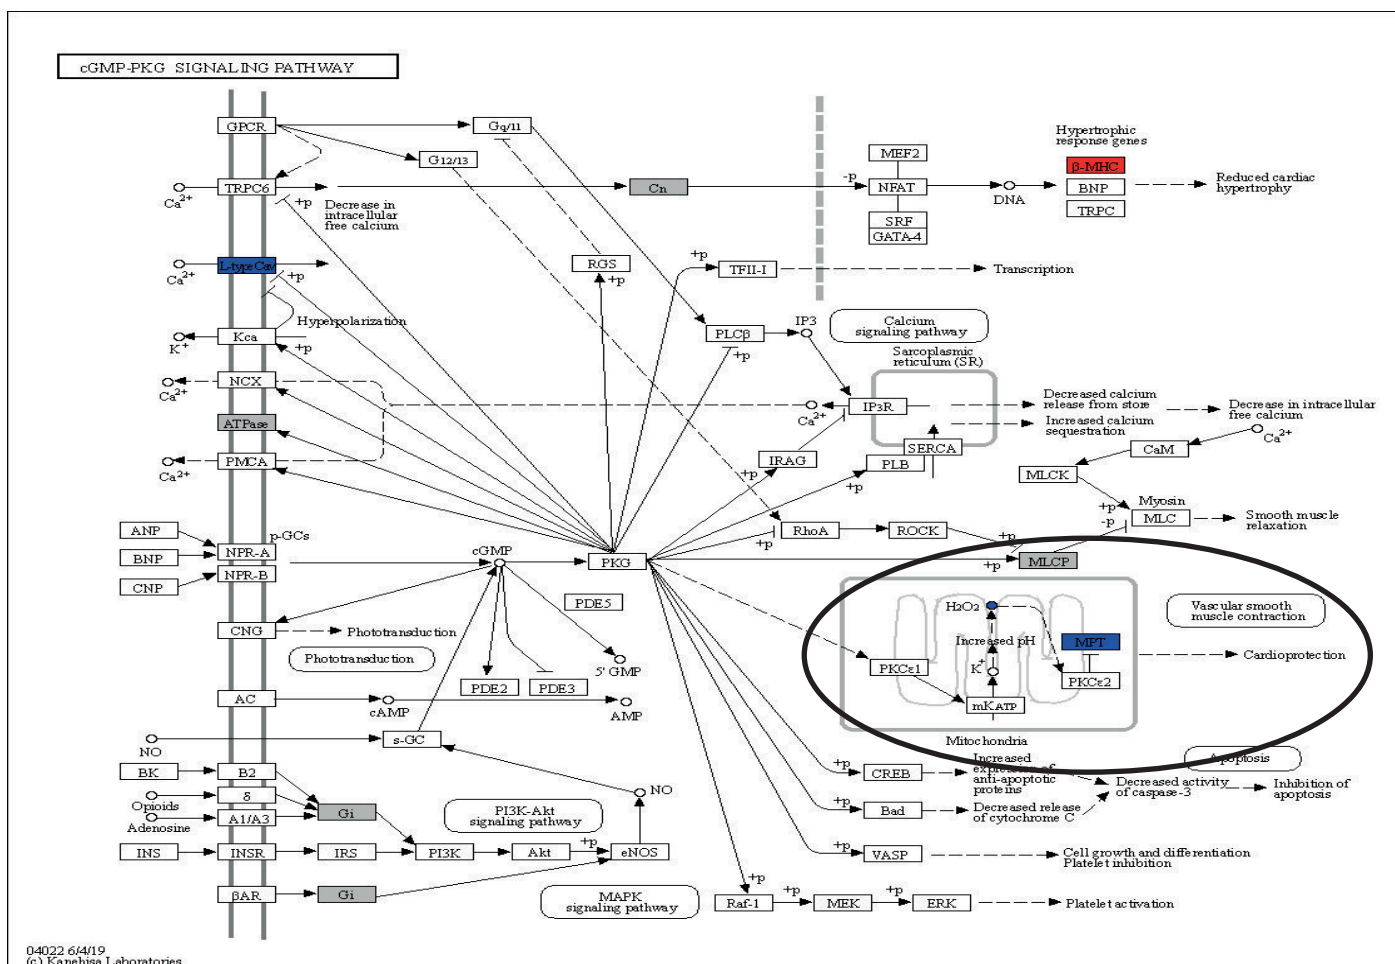

**Figure 4 - Figure Supplement 1**  
**cGMP-PKG with overlay data from differential expression and reporter metabolites analysis.**
