# Supplementary material for: Integrative transcriptomic analysis of tissue-specific metabolic crosstalk after myocardial infarction
Source: eLife journal article supplement (doi:10.7554/elife.66921), 2021-05-10
Supplement: supp [file elife-66921-supp-v1.zip]

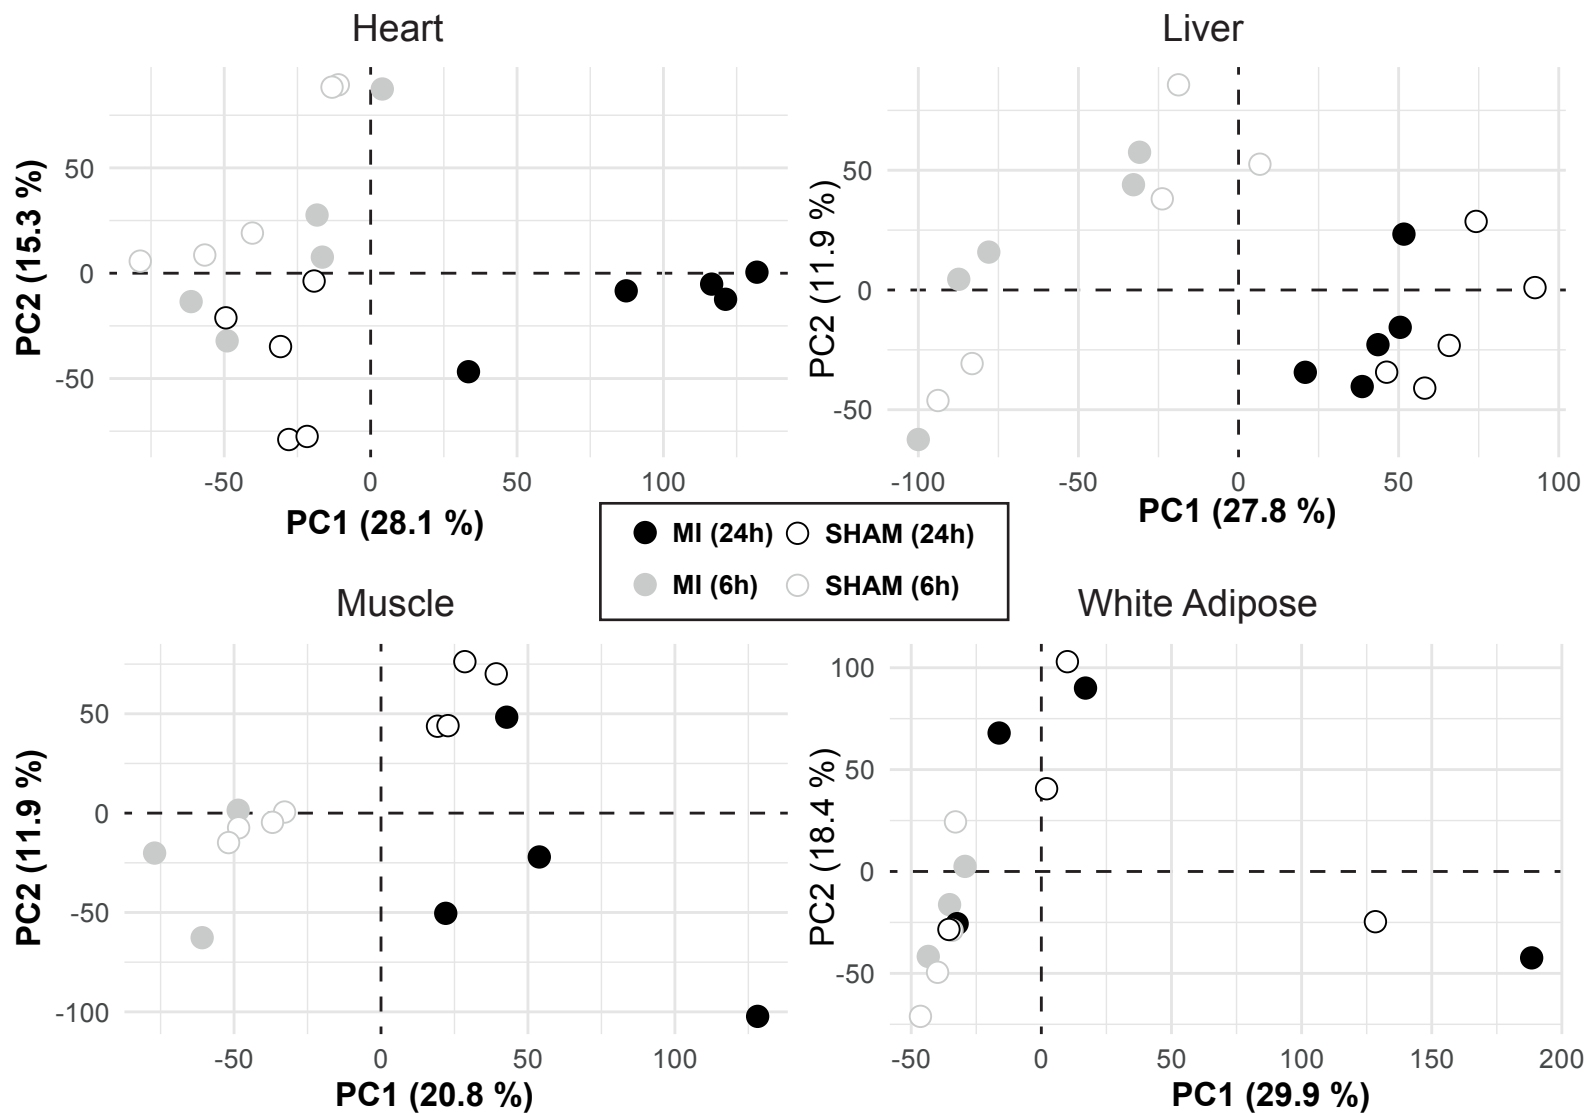

**Figure 1 - Figure Supplement 1**  
**Data Exploration of the Samples**

PCA plots of each tissue showing data from mice 6 and 24 h after an MI or sham operation. The plot showed that heart was affected the most by the change in conditions and the rest were most affected by time shifts..
