# Supplementary material for: Integrative transcriptomic analysis of tissue-specific metabolic crosstalk after myocardial infarction
Source: eLife journal article supplement (doi:10.7554/elife.66921), 2021-05-10
Supplement: supp [file elife-66921-supp-v1.zip]

Archive with 16 entries (16 files):
- elife_poa_e66921_Figure_1_figure_supplement_1.pdf
- elife_poa_e66921_Figure_1_figure_supplement_2.pdf
- elife_poa_e66921_Figure_1_figure_supplement_3.pdf
- elife_poa_e66921_Figure_1_figure_supplement_4.pdf
- elife_poa_e66921_Figure_4_figure_supplement_1.pdf
- elife_poa_e66921_Figure_4_figure_supplement_2.pdf
- elife_poa_e66921_Supplementary_file_1.xlsx
- elife_poa_e66921_Supplementary_file_2.xlsx
- elife_poa_e66921_Supplementary_file_3.xlsx
- elife_poa_e66921_Supplementary_file_4.xlsx
- elife_poa_e66921_Supplementary_file_5.xlsx
- elife_poa_e66921_Supplementary_file_6.xlsx
- elife_poa_e66921_Supplementary_file_7.xlsx
- elife_poa_e66921_Supplementary_file_8.xlsx
- elife_poa_e66921_Supplementary_file_9.xlsx
- elife_poa_e66921_Transparent_Reporting_File.docx
