# Supplementary material for: Integrative transcriptomic analysis of tissue-specific metabolic crosstalk after myocardial infarction
Source: eLife journal article supplement (doi:10.7554/elife.66921), 2021-05-10
Supplement: supp [file elife-66921-supp-v1.zip › elife_poa_e66921_Figure_1_figure_supplement_3.pdf]

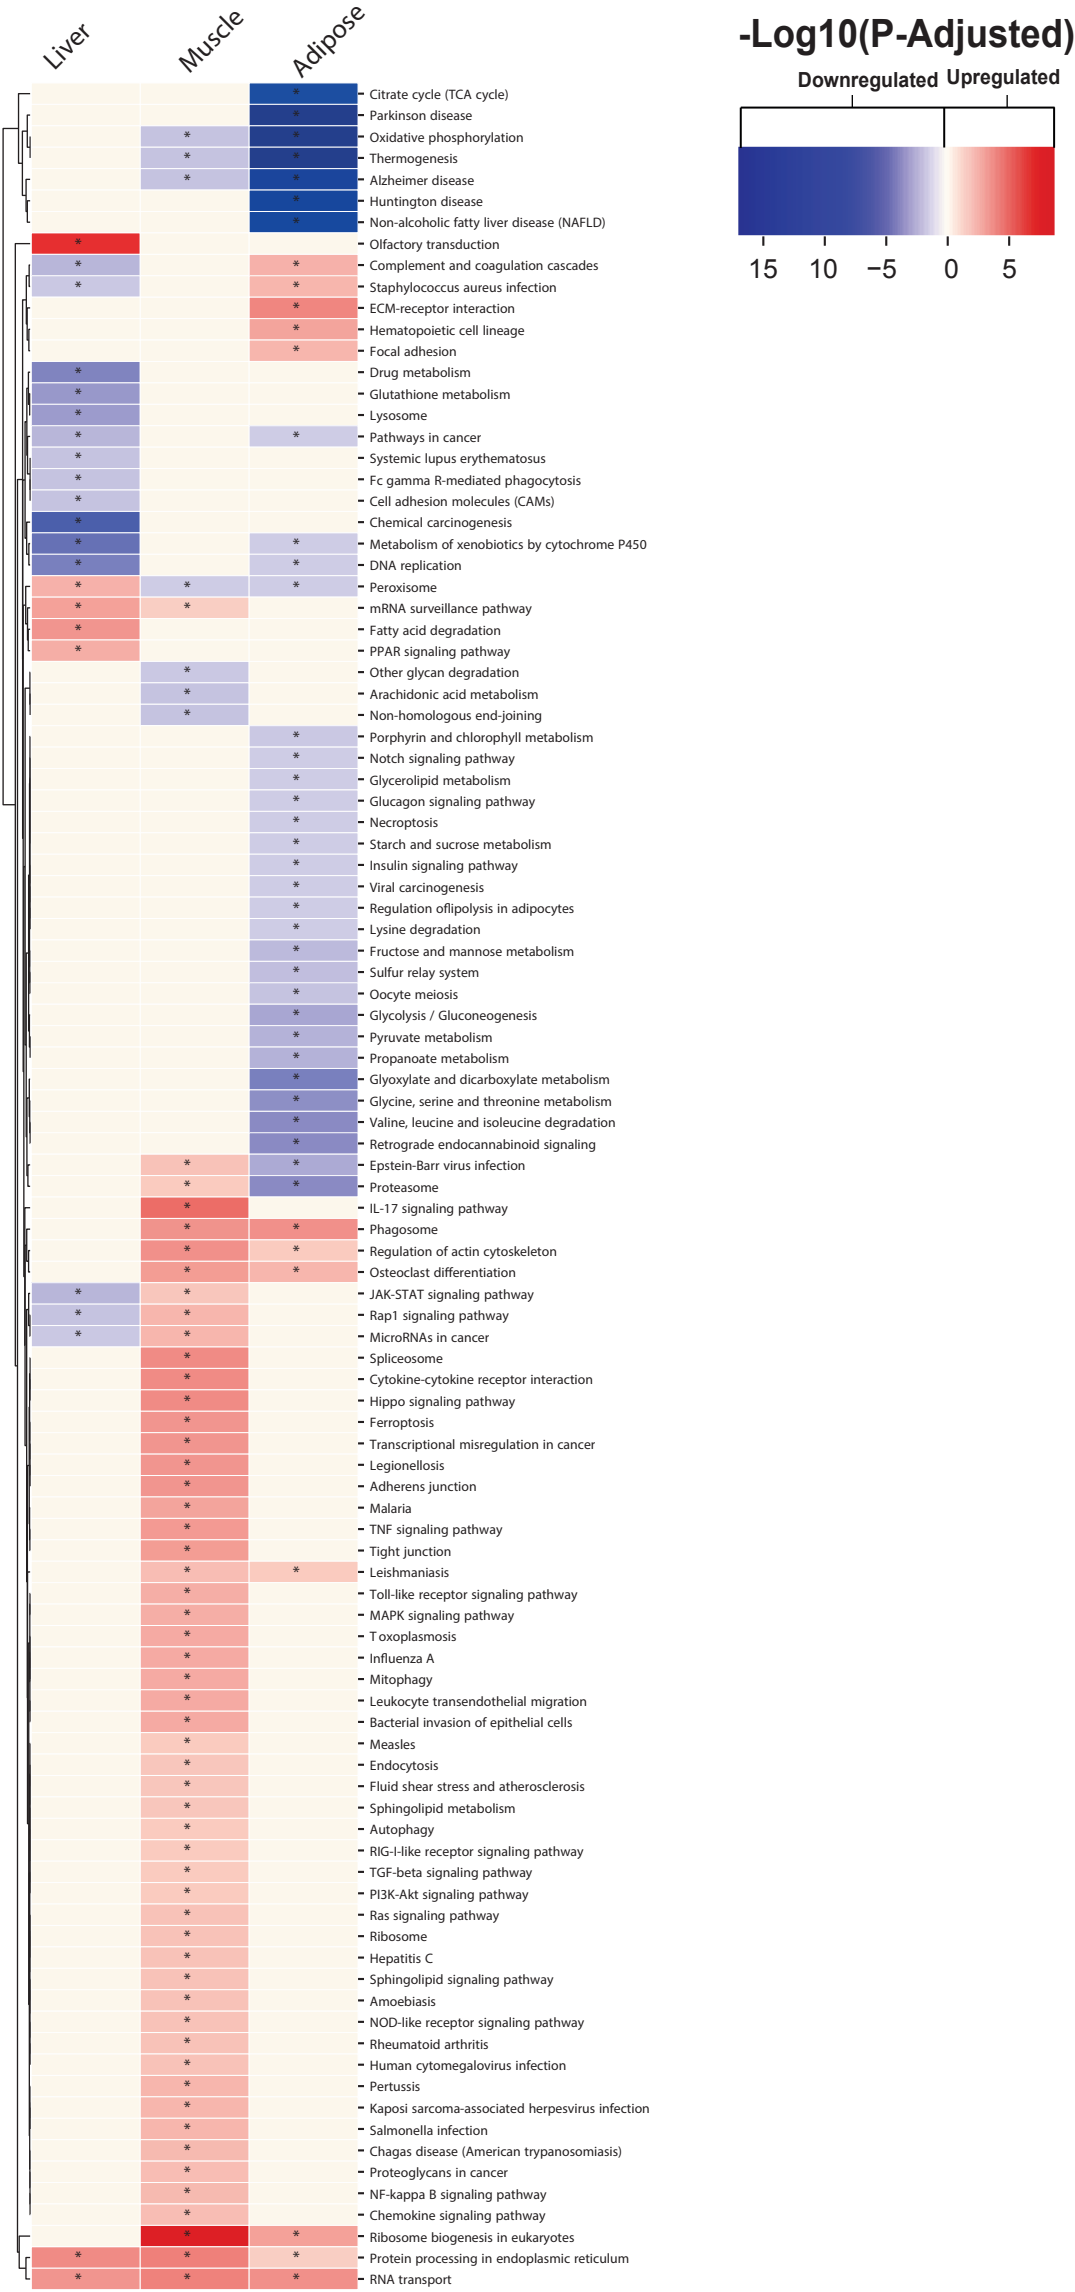

Figure 1 - Figure Supplement 3

KEGG pathway analysis results for each tissue

Liver, Muscle, and Adipose tissue 24 hours

post MI.
