# Supplementary material for: Integrative transcriptomic analysis of tissue-specific metabolic crosstalk after myocardial infarction
Source: eLife journal article supplement (doi:10.7554/elife.66921), 2021-05-10
Supplement: supp [file elife-66921-supp-v1.zip › elife_poa_e66921_Supplementary_file_1.xlsx]

## Sheet: Heart (24h)
Gene name	L2FC	P-VALUE	P-ADJ	DIRECTION
F10	3.36981	1.94137e-44	3.0132e-40	UP
Ankrd2	4.48322	2.02883e-34	1.57448e-30	UP
Ptpra	-19.1951	2.45956e-32	1.27249e-28	DOWN
Serpinf2	18.0876	7.35045e-29	2.85216e-25	UP
C4bp	17.5527	4.3683e-26	1.35601e-22	UP
Mfsd2a	18.1855	2.16897e-25	5.61078e-22	UP
Eif6	1.40352	8.6828e-24	1.92523e-20	UP
Txnrd1	1.38707	1.19104e-23	2.31077e-20	UP
Uck2	2.52237	2.12416e-23	3.66323e-20	UP
Gsr	1.15397	9.23852e-23	1.43391e-19	UP
Efhd2	2.30473	2.36777e-22	3.34092e-19	UP
Slfn1	3.4183	4.08566e-22	5.28447e-19	UP
Nmrk2	4.52668	1.36953e-20	1.63512e-17	UP
Pcmtd1	-1.17644	2.50776e-20	2.62483e-17	DOWN
1700047I17Rik2	-17.4102	2.53672e-20	2.62483e-17	DOWN
Cdnf	-1.12551	1.02399e-19	9.93334e-17	DOWN
Hspa1a	4.9626	1.15334e-19	1.053e-16	UP
Map2k1	0.706242	6.02468e-19	5.19495e-16	UP
Cpeb3	-0.99525	6.9793e-19	5.70136e-16	DOWN
Kcnv2	-2.22792	1.27105e-18	9.86396e-16	DOWN
Capza1	0.864294	1.85578e-18	1.3716e-15	UP
Lrrc14b	-1.45626	2.03447e-18	1.43532e-15	DOWN
Rtn4	1.95638	9.31316e-18	6.28476e-15	UP
Slfn4	4.40706	1.47217e-17	9.52067e-15	UP
Rrp12	1.75584	1.81994e-17	1.12989e-14	UP
Hspa1b	4.83867	1.99675e-17	1.19198e-14	UP
Cxcr2	3.62769	2.36443e-17	1.3592e-14	UP
Cxcl2	5.43619	2.91777e-17	1.61738e-14	UP
Cttn	0.952806	5.43607e-17	2.90942e-14	UP
Ccr1	2.6532	6.63363e-17	3.43202e-14	UP
Eaf1	1.16209	1.23549e-16	6.1858e-14	UP
Actn1	1.98117	1.618e-16	7.84779e-14	UP
Eif4a1	1.23015	1.78296e-16	8.38584e-14	UP
Rnd1	2.61612	1.9669e-16	8.82282e-14	UP
Efcab2	-1.38575	1.98955e-16	8.82282e-14	DOWN
Kcnd2	-1.67571	2.07893e-16	8.96309e-14	DOWN
Dhrs7c	-1.39157	4.11447e-16	1.72596e-13	DOWN
Trem1	4.55914	4.2692e-16	1.74374e-13	UP
Cap1	0.871859	8.18938e-16	3.25916e-13	UP
Cldn14	16.4933	8.99855e-16	3.49166e-13	UP
Srxn1	1.56332	9.9504e-16	3.72669e-13	UP
Pdzk1	14.4762	1.00845e-15	3.72669e-13	UP
Ttc32	-1.19835	1.41128e-15	5.09405e-13	DOWN
Tubb6	2.29863	2.16068e-15	7.6218e-13	UP
Mtif2	-0.850422	2.24097e-15	7.72936e-13	DOWN
Arhgdia	1.05815	4.78499e-15	1.61452e-12	UP
Ttc9	3.24107	5.15925e-15	1.70376e-12	UP
Pabpc1	0.763646	6.77017e-15	2.18916e-12	UP
Gpr35	2.39386	7.2307e-15	2.29036e-12	UP
Rras2	1.91174	8.44808e-15	2.61137e-12	UP
Ero1l	1.40492	8.58062e-15	2.61137e-12	UP
Scrn3	-0.887399	1.59124e-14	4.74956e-12	DOWN
Txlnb	-1.03673	2.60675e-14	7.63385e-12	DOWN
Nop56	1.0394	2.93706e-14	8.44187e-12	UP
Rida	-1.4769	3.57022e-14	1.00752e-11	DOWN
Tspan9	1.63998	4.48616e-14	1.24339e-11	UP
Plcxd2	3.90108	5.46611e-14	1.48841e-11	UP
Slc16a3	3.30252	7.32286e-14	1.95962e-11	UP
Akr1e1	-0.940803	9.83368e-14	2.58693e-11	DOWN
Usp53	1.63241	1.04353e-13	2.69944e-11	UP
Lsmem1	-2.41373	1.39606e-13	3.55217e-11	DOWN
Mybbp1a	0.933054	1.51616e-13	3.79554e-11	UP
Oma1	-0.799189	1.9919e-13	4.90734e-11	DOWN
Oard1	-0.991	2.36722e-13	5.74089e-11	DOWN
Ctnnal1	-1.68934	2.41202e-13	5.75954e-11	DOWN
Ltb4r1	3.44393	2.7201e-13	6.39676e-11	UP
Myh9	1.3475	3.75954e-13	8.70922e-11	UP
Yipf7	-1.0055	4.78301e-13	1.07877e-10	DOWN
Gm5483	6.35466	4.79575e-13	1.07877e-10	UP
Hspb1	2.43497	5.08748e-13	1.12804e-10	UP
Sbno2	1.78425	5.22568e-13	1.14236e-10	UP
Ppme1	1.32384	5.43405e-13	1.17142e-10	UP
Smim8	-1.09229	5.88412e-13	1.25106e-10	DOWN
Cfl1	0.980013	8.42806e-13	1.76773e-10	UP
Ereg	3.53445	8.88131e-13	1.83796e-10	UP
Cebpzos	-0.980175	1.33732e-12	2.73111e-10	DOWN
Tln1	1.2152	1.56335e-12	3.09876e-10	UP
Rab21	-0.447447	1.57738e-12	3.09876e-10	DOWN
Klhdc1	-1.4149	1.58552e-12	3.09876e-10	DOWN
Rai14	1.61452	1.5972e-12	3.09876e-10	UP
Fhl1	2.10052	2.24403e-12	4.29996e-10	UP
Adamdec1	14.6991	2.37532e-12	4.49602e-10	UP
Aaed1	-0.966375	2.41452e-12	4.51514e-10	DOWN
Ccng1	-0.916108	2.57897e-12	4.76527e-10	DOWN
Asb10	-1.36137	3.00653e-12	5.48992e-10	DOWN
Myl6	0.778381	3.04445e-12	5.49452e-10	UP
Nifk	1.03421	4.01273e-12	7.1588e-10	UP
2310057M21Rik	2.04054	4.91741e-12	8.67308e-10	UP
Il18rap	3.72087	5.11533e-12	8.92079e-10	UP
Grwd1	1.41118	5.61274e-12	9.6594e-10	UP
Adamts4	5.02117	5.66333e-12	9.6594e-10	UP
Csf3r	3.37303	6.02092e-12	1.01577e-09	UP
Tpm3	1.01706	8.58961e-12	1.43354e-09	UP
Ppp1r14c	-0.955379	1.0422e-11	1.71711e-09	DOWN
Wfdc21	4.12115	1.051e-11	1.71711e-09	UP
Mgea5	-0.757232	1.34268e-11	2.1708e-09	DOWN
Svip	-0.912716	1.38084e-11	2.20436e-09	DOWN
Qsox1	1.22182	1.39184e-11	2.20436e-09	UP
Nop2	1.06339	1.47739e-11	2.31622e-09	UP
Gnb1	0.584723	1.5255e-11	2.36773e-09	UP
Dele1	-0.638685	1.61052e-11	2.47494e-09	DOWN
Cd300lf	3.61685	1.76383e-11	2.68396e-09	UP
Pkd2l2	-1.38754	1.8265e-11	2.75235e-09	DOWN
Flnc	2.60454	1.88897e-11	2.8191e-09	UP
Ddx21	0.993556	1.94898e-11	2.88096e-09	UP
Il1b	3.82726	2.3548e-11	3.44801e-09	UP
Scn4b	-1.40271	2.43163e-11	3.50421e-09	DOWN
Tgfbi	1.7031	2.43834e-11	3.50421e-09	UP
Arg1	2.95938	2.74913e-11	3.91461e-09	UP
Dusp15	14.5245	2.80535e-11	3.95835e-09	UP
Mxd1	1.49627	2.83235e-11	3.96045e-09	UP
Dph5	1.23388	3.25341e-11	4.50858e-09	UP
Lgr6	-1.03965	4.37684e-11	6.01177e-09	DOWN
Arpc4	0.669343	4.49982e-11	6.12646e-09	UP
Aga	-0.985891	5.04082e-11	6.80336e-09	DOWN
Wdr74	1.03131	5.49851e-11	7.3571e-09	UP
Prelid1	1.00719	5.76295e-11	7.64503e-09	UP
Sell	2.72534	5.85113e-11	7.69622e-09	UP
Mmab	-1.02646	5.99912e-11	7.82456e-09	DOWN
Srgn	1.76443	6.67997e-11	8.63998e-09	UP
D3Ertd751e	-1.43228	6.89704e-11	8.84703e-09	DOWN
Mmp9	3.90982	7.205e-11	9.1663e-09	UP
Spred3	2.58119	7.78288e-11	9.82098e-09	UP
Ammecr1	0.903174	7.96678e-11	9.97197e-09	UP
Vldlr	-0.975891	8.49927e-11	1.05534e-08	DOWN
Lrrc59	1.22412	8.70517e-11	1.07232e-08	UP
Slc2a1	2.19689	9.1407e-11	1.11711e-08	UP
Zkscan5	0.777257	9.26153e-11	1.12303e-08	UP
Rmdn1	-0.730948	1.01162e-10	1.21425e-08	DOWN
Nqo2	-1.15447	1.01703e-10	1.21425e-08	DOWN
Reep1	-1.06986	1.1139e-10	1.31976e-08	DOWN
Pus7	0.809866	1.24825e-10	1.46773e-08	UP
Mtr	-0.71447	1.26374e-10	1.47478e-08	DOWN
Tent5b	2.53409	1.36056e-10	1.57591e-08	UP
Esd	0.73889	1.47755e-10	1.69874e-08	UP
Il4ra	2.43979	1.56623e-10	1.78747e-08	UP
Nop16	0.946608	1.67256e-10	1.89488e-08	UP
Uros	-1.00209	1.80632e-10	2.03158e-08	DOWN
Myo9b	0.901142	2.00981e-10	2.23678e-08	UP
Mak16	0.958325	2.01967e-10	2.23678e-08	UP
Crlf1	2.93038	2.032e-10	2.23678e-08	UP
Oas3	3.73345	2.07432e-10	2.26729e-08	UP
Ildr1	15.8387	2.17922e-10	2.36529e-08	UP
S100a8	3.36767	2.60187e-10	2.79012e-08	UP
5730455P16Rik	-0.67827	2.60658e-10	2.79012e-08	DOWN
Coq10a	-0.78872	2.64185e-10	2.8085e-08	DOWN
Ppp2r3a	-0.987917	2.70823e-10	2.85948e-08	DOWN
Arpc1b	0.915802	2.73428e-10	2.86749e-08	UP
Thbs1	3.46657	2.82264e-10	2.94028e-08	UP
Wdr1	0.880544	2.90892e-10	3.00996e-08	UP
Nme1	0.940737	2.95754e-10	3.04e-08	UP
Ttc38	-1.2061	2.98571e-10	3.04876e-08	DOWN
Prg4	2.05145	3.20829e-10	3.24486e-08	UP
Il6	3.88625	3.21956e-10	3.24486e-08	UP
Zfp568	1.46473	3.44681e-10	3.45148e-08	UP
Ccdc86	1.26329	3.70397e-10	3.68522e-08	UP
Gja3	-0.876995	3.82014e-10	3.77658e-08	DOWN
Epm2a	-0.927263	4.18106e-10	4.10723e-08	DOWN
Ilk	0.692464	4.22354e-10	4.12286e-08	UP
H2afv	-0.823118	4.28435e-10	4.15609e-08	DOWN
Synpo2l	1.73852	4.47223e-10	4.3114e-08	UP
Ptgs2	3.37422	4.64602e-10	4.45129e-08	UP
Inhba	2.83815	4.93843e-10	4.70242e-08	UP
Pdss2	-0.679861	5.15094e-10	4.87486e-08	DOWN
Mfn1	-0.465895	5.60052e-10	5.26419e-08	DOWN
Eif1a	1.38454	5.63015e-10	5.26419e-08	UP
Rbm19	1.30585	5.9454e-10	5.52567e-08	UP
Pfkfb2	-1.69099	6.19111e-10	5.71977e-08	DOWN
Immp1l	-0.797593	6.4982e-10	5.96796e-08	DOWN
Odc1	1.19558	6.64144e-10	6.06364e-08	UP
Gnl3	1.26908	6.82512e-10	6.18987e-08	UP
Nsun2	0.630725	6.85946e-10	6.18987e-08	UP
Srm	1.43298	7.40887e-10	6.61581e-08	UP
Wdr43	0.785715	7.41673e-10	6.61581e-08	UP
Bax	0.856451	7.85439e-10	6.96617e-08	UP
Pwp2	0.941556	8.20276e-10	7.23381e-08	UP
Cog5	-0.9198	8.26149e-10	7.24444e-08	DOWN
Ccdc90b	-0.712708	8.31913e-10	7.254e-08	DOWN
Rhoc	1.29326	9.91865e-10	8.60041e-08	UP
Tnc	3.20025	1.04609e-09	8.99527e-08	UP
Cct2	0.484426	1.04899e-09	8.99527e-08	UP
Sdhaf4	-0.811491	1.15345e-09	9.83663e-08	DOWN
Aldh5a1	-0.738097	1.18544e-09	1.00542e-07	DOWN
E2f4	0.880132	1.23708e-09	1.04352e-07	UP
Ubash3b	2.31554	1.27226e-09	1.06739e-07	UP
Il1rap	1.03435	1.29555e-09	1.08109e-07	UP
Eif4e	-0.605782	1.34786e-09	1.11873e-07	DOWN
Cd14	2.09089	1.36093e-09	1.12356e-07	UP
Rrp7a	0.656355	1.36871e-09	1.12401e-07	UP
Inhbb	3.19541	1.37712e-09	1.12496e-07	UP
Clic1	1.19203	1.46042e-09	1.18676e-07	UP
Selp	3.32819	1.63278e-09	1.31992e-07	UP
Pcmtd2	-1.07232	1.65899e-09	1.33415e-07	DOWN
Il1r2	5.18928	1.72206e-09	1.37774e-07	UP
Rdm1	-0.896106	1.74575e-09	1.38953e-07	DOWN
Ccnh	-0.722558	1.81671e-09	1.43863e-07	DOWN
Mrpl39	-0.701295	1.85727e-09	1.46328e-07	DOWN
Uhrf1bp1l	0.811412	1.92517e-09	1.50912e-07	UP
Cct3	0.665979	1.97167e-09	1.53781e-07	UP
Csf2rb	2.39506	1.98829e-09	1.54302e-07	UP
Synj2bp	-0.6096	2.05948e-09	1.5903e-07	DOWN
Thbs4	1.21244	2.1221e-09	1.63055e-07	UP
Asprv1	3.36083	2.152e-09	1.64535e-07	UP
Hnrnpf	0.530799	2.16821e-09	1.64535e-07	UP
Chst1	2.29184	2.17389e-09	1.64535e-07	UP
Cd33	2.25294	2.18376e-09	1.64535e-07	UP
Polr3e	0.719686	2.34527e-09	1.75333e-07	UP
Cd80	2.06459	2.34967e-09	1.75333e-07	UP
Eno1	1.13768	2.55032e-09	1.89395e-07	UP
Hp	2.05	2.7008e-09	1.99615e-07	UP
Zfp593	1.24323	2.74823e-09	2.01209e-07	UP
Ak3	-0.827905	2.7483e-09	2.01209e-07	DOWN
Gpatch4	0.923805	2.7692e-09	2.01788e-07	UP
H2-Q10	4.05274	2.89708e-09	2.10119e-07	UP
Tfpi2	1.89859	2.92066e-09	2.10844e-07	UP
Fbl	0.875904	2.94345e-09	2.11506e-07	UP
Siae	-1.02669	3.06466e-09	2.19201e-07	DOWN
Paip2b	-0.839141	3.28852e-09	2.34134e-07	DOWN
AA467197	5.03892	3.32873e-09	2.35914e-07	UP
Tsr1	0.967956	3.347e-09	2.36131e-07	UP
Creb3	0.75468	3.39375e-09	2.38346e-07	UP
Ran	0.599258	3.49644e-09	2.44451e-07	UP
Ptgr2	-1.00115	3.67853e-09	2.56029e-07	DOWN
Ftsj3	0.888167	3.79306e-09	2.62584e-07	UP
Ptbp1	1.08298	3.80655e-09	2.62584e-07	UP
Heatr1	1.52539	3.87967e-09	2.66444e-07	UP
Fkbp1a	0.582887	3.93597e-09	2.6912e-07	UP
Cytip	2.81909	4.32017e-09	2.93545e-07	UP
Sema7a	1.29683	4.33102e-09	2.93545e-07	UP
Shld1	-1.6366	4.40836e-09	2.9661e-07	DOWN
Mlip	-0.61823	4.41446e-09	2.9661e-07	DOWN
Ctps	1.30511	4.4482e-09	2.97588e-07	UP
Fpr2	3.51549	4.92754e-09	3.28242e-07	UP
Il1f9	2.87844	5.1796e-09	3.43558e-07	UP
Myh7b	-1.62101	5.25672e-09	3.47189e-07	DOWN
Pgam1	1.17915	5.5598e-09	3.65651e-07	UP
Pprc1	1.23324	5.60772e-09	3.67246e-07	UP
Msh2	-1.02747	5.98891e-09	3.90562e-07	DOWN
Pfn1	0.894799	6.27199e-09	4.07312e-07	UP
Zfand1	-0.760432	6.43508e-09	4.16162e-07	DOWN
Arpc5	0.707713	6.48723e-09	4.16712e-07	UP
Casd1	-0.623036	6.49728e-09	4.16712e-07	DOWN
Usp15	-0.794535	7.62549e-09	4.87059e-07	DOWN
Rab5c	0.579821	7.76368e-09	4.93853e-07	UP
Il1rn	3.57859	7.79996e-09	4.94136e-07	UP
S100a9	3.37745	8.83568e-09	5.55677e-07	UP
Fkbp3	-0.588179	8.843e-09	5.55677e-07	DOWN
Btbd1	-0.380807	8.92326e-09	5.58459e-07	DOWN
Zbtb7b	0.912084	9.32682e-09	5.81372e-07	UP
Zfp697	1.93064	9.8547e-09	6.11819e-07	UP
Sema3f	1.7768	1.00812e-08	6.23386e-07	UP
Galm	-1.28385	1.13673e-08	7.00129e-07	DOWN
Znrd1as	-1.02697	1.14747e-08	7.03951e-07	DOWN
D2hgdh	-0.94744	1.22165e-08	7.46506e-07	DOWN
Vasp	1.13469	1.25577e-08	7.64348e-07	UP
Lmcd1	1.81809	1.41052e-08	8.54056e-07	UP
Cc2d2a	-1.13984	1.41416e-08	8.54056e-07	DOWN
Shc1	0.634054	1.44594e-08	8.69861e-07	UP
2610008E11Rik	-0.5859	1.49476e-08	8.95758e-07	DOWN
Sspn	-0.723543	1.55873e-08	9.28611e-07	DOWN
Lmod3	-1.34133	1.56396e-08	9.28611e-07	DOWN
Rab28	-0.542639	1.57176e-08	9.28611e-07	DOWN
Grsf1	-0.55786	1.57351e-08	9.28611e-07	DOWN
Rnf207	-1.21695	1.58551e-08	9.32145e-07	DOWN
Triobp	3.84213	1.63621e-08	9.54155e-07	UP
Usp36	0.961929	1.63963e-08	9.54155e-07	UP
Aamdc	-0.804385	1.64139e-08	9.54155e-07	DOWN
Dnajc28	-1.37179	1.65608e-08	9.56047e-07	DOWN
Myh7	1.89077	1.66193e-08	9.56047e-07	UP
Spatc1	5.75975	1.66652e-08	9.56047e-07	UP
Tuba1b	1.55642	1.66928e-08	9.56047e-07	UP
Sh3pxd2b	1.35376	1.71724e-08	9.79897e-07	UP
Uba2	0.555169	1.7471e-08	9.93287e-07	UP
Fpr1	3.76525	1.78649e-08	1.01198e-06	UP
R3hdm2	-0.479368	1.83162e-08	1.0331e-06	DOWN
Ch25h	3.08623	1.83709e-08	1.0331e-06	UP
Slfn2	1.56552	1.88147e-08	1.05423e-06	UP
Cacna1s	-0.921159	1.88962e-08	1.05499e-06	DOWN
Wdyhv1	-0.937376	1.9291e-08	1.07317e-06	DOWN
Kiz	-0.86248	1.98186e-08	1.09859e-06	DOWN
Prmt1	0.912041	1.98983e-08	1.09908e-06	UP
Pes1	0.628605	2.00597e-08	1.10406e-06	UP
Gdf15	4.12522	2.02452e-08	1.11034e-06	UP
Nhp2	1.10755	2.03866e-08	1.11415e-06	UP
Pa2g4	0.444712	2.21472e-08	1.20613e-06	UP
Adam9	0.725065	2.23508e-08	1.21296e-06	UP
Kifap3	-0.74534	2.28364e-08	1.23499e-06	DOWN
Cstb	0.821307	2.29231e-08	1.23538e-06	UP
Mterf2	-1.23275	2.34078e-08	1.25482e-06	DOWN
Ctdp1	1.03832	2.34454e-08	1.25482e-06	UP
Pgf	2.91405	2.42628e-08	1.2941e-06	UP
Lif	3.07367	2.45553e-08	1.30522e-06	UP
0610009B22Rik	-0.578269	2.62762e-08	1.39192e-06	DOWN
Itga5	2.03249	2.6815e-08	1.41563e-06	UP
Rpl7l1	0.533526	2.73955e-08	1.44138e-06	UP
Phc2	0.672855	2.7627e-08	1.44865e-06	UP
Dynll2	-0.634669	2.84122e-08	1.4848e-06	DOWN
Nup62	1.00449	2.86307e-08	1.4912e-06	UP
Lmna	0.938329	2.90243e-08	1.50556e-06	UP
Fhad1	5.95787	2.91221e-08	1.50556e-06	UP
B4galt5	1.56762	2.91974e-08	1.50556e-06	UP
Pdp2	-1.33903	3.05432e-08	1.56974e-06	DOWN
Taco1	-0.625479	3.1299e-08	1.60327e-06	DOWN
Ppan	1.45671	3.53227e-08	1.80343e-06	UP
Pafah1b2	0.518454	3.63993e-08	1.85231e-06	UP
Exosc2	0.680272	3.76695e-08	1.91068e-06	UP
Anp32b	0.561927	3.85458e-08	1.94614e-06	UP
Utp20	0.789471	3.86194e-08	1.94614e-06	UP
Anxa7	0.717643	3.97822e-08	1.99825e-06	UP
Msrb2	-1.02613	4.01286e-08	2.00915e-06	DOWN
Tmco1	-0.549417	4.10291e-08	2.04763e-06	DOWN
Abcb7	-0.69872	4.3308e-08	2.15443e-06	DOWN
Naip2	1.27699	4.38161e-08	2.17275e-06	UP
Nubpl	-0.829745	4.50693e-08	2.22777e-06	DOWN
Syt12	1.79598	4.63075e-08	2.28171e-06	UP
Mrpl3	-0.943999	4.69813e-08	2.30758e-06	DOWN
Ecpas	-0.49569	4.72426e-08	2.3131e-06	DOWN
Serpine1	3.3146	4.75858e-08	2.32258e-06	UP
Fn3k	-1.73262	4.78013e-08	2.32578e-06	DOWN
Actr3	0.594205	4.9285e-08	2.39048e-06	UP
Acyp1	-1.0314	4.96407e-08	2.40023e-06	DOWN
Armc6	1.34749	5.01362e-08	2.41666e-06	UP
Nckap1	0.4931	5.19515e-08	2.4964e-06	UP
Mkrn2	-0.536472	5.23752e-08	2.509e-06	DOWN
Paip1	-0.48603	5.48169e-08	2.61788e-06	DOWN
Txndc15	-0.554177	5.51965e-08	2.6236e-06	DOWN
Mid1	1.28736	5.52745e-08	2.6236e-06	UP
Ttc19	-0.653098	5.57117e-08	2.63603e-06	DOWN
Mlkl	1.67698	5.58762e-08	2.63603e-06	UP
Kdelc2	-0.770153	5.62038e-08	2.64345e-06	DOWN
Commd3	-0.607973	5.88395e-08	2.75906e-06	DOWN
Mff	-0.407693	6.12845e-08	2.86505e-06	DOWN
Tbl2	0.809208	6.45584e-08	3.00904e-06	UP
Noc2l	0.610606	6.55119e-08	3.04434e-06	UP
Sgo2a	-1.27971	6.6337e-08	3.07225e-06	DOWN
Adamts1	2.27681	6.65084e-08	3.07225e-06	UP
Snapc5	-0.667358	6.70287e-08	3.0871e-06	DOWN
Hcar2	3.9125	6.77422e-08	3.10577e-06	UP
Ptpn23	0.879255	6.78343e-08	3.10577e-06	UP
Trmt61a	1.36323	7.00116e-08	3.19366e-06	UP
Gstk1	-0.739783	7.01654e-08	3.19366e-06	DOWN
Cct5	0.567295	7.60216e-08	3.45009e-06	UP
Cxcl3	5.86501	7.71382e-08	3.48205e-06	UP
Carnmt1	-0.748604	7.71744e-08	3.48205e-06	DOWN
Glipr2	1.81218	8.06414e-08	3.62236e-06	UP
Asrgl1	-0.599779	8.07511e-08	3.62236e-06	DOWN
Abcc1	0.779197	8.21449e-08	3.66612e-06	UP
Hars	0.490382	8.2199e-08	3.66612e-06	UP
Abca12	-1.56255	8.36809e-08	3.72152e-06	DOWN
Ccdc181	-1.01774	8.71007e-08	3.84864e-06	DOWN
Actn4	0.917132	8.71354e-08	3.84864e-06	UP
Selplg	1.98569	8.73711e-08	3.84864e-06	UP
Osmr	1.33512	8.75312e-08	3.84864e-06	UP
Tom1l1	-0.649366	9.41847e-08	4.12949e-06	DOWN
Fn1	2.09866	9.56347e-08	4.18126e-06	UP
Nop58	1.06995	9.64571e-08	4.20537e-06	UP
Bysl	0.857632	9.844e-08	4.2798e-06	UP
Camk2a	-1.14254	9.95876e-08	4.3176e-06	DOWN
Asnsd1	-0.491643	1.00225e-07	4.33313e-06	DOWN
2010315B03Rik	-0.847864	1.01511e-07	4.37323e-06	DOWN
Scaper	-0.776357	1.01859e-07	4.37323e-06	DOWN
Bms1	0.47559	1.01998e-07	4.37323e-06	UP
Wdr35	-0.894279	1.03394e-07	4.42086e-06	DOWN
Il11	4.91536	1.09165e-07	4.65482e-06	UP
Mmp8	3.37643	1.09896e-07	4.67267e-06	UP
Etfrf1	-0.888315	1.10186e-07	4.67267e-06	DOWN
Baz1a	1.18868	1.12434e-07	4.75499e-06	UP
Xpo6	0.873058	1.14053e-07	4.81037e-06	UP
3830406C13Rik	-0.79185	1.15346e-07	4.84823e-06	DOWN
Ank1	-0.58493	1.15575e-07	4.84823e-06	DOWN
Ube2b	-0.690433	1.15912e-07	4.84925e-06	DOWN
Nlrp3	2.5733	1.17205e-07	4.89017e-06	UP
Usp39	0.736713	1.18109e-07	4.91466e-06	UP
Ptpn12	1.17195	1.1911e-07	4.94308e-06	UP
Amz2	-0.513009	1.21046e-07	5.01002e-06	DOWN
Arf6	1.14472	1.2442e-07	5.13597e-06	UP
Arid5a	1.75627	1.30284e-07	5.36378e-06	UP
Itpkc	1.48746	1.3117e-07	5.38594e-06	UP
Abce1	0.575406	1.32875e-07	5.43239e-06	UP
Rhog	0.768238	1.33001e-07	5.43239e-06	UP
Msn	1.5108	1.33878e-07	5.45387e-06	UP
Pm20d1	-0.953278	1.36236e-07	5.53539e-06	DOWN
Tmem69	-0.675428	1.37664e-07	5.57879e-06	DOWN
Zyx	1.05718	1.41268e-07	5.70995e-06	UP
Tnfrsf9	4.91257	1.42237e-07	5.73418e-06	UP
Mob3a	1.49365	1.44622e-07	5.81524e-06	UP
Hrc	-0.801345	1.46543e-07	5.87724e-06	DOWN
Tgm1	2.54704	1.48503e-07	5.9405e-06	UP
Picalm	1.16999	1.5075e-07	6.01489e-06	UP
Dbn1	1.88159	1.51678e-07	6.0364e-06	UP
Nr1d2	-0.989065	1.52489e-07	6.05313e-06	DOWN
Rassf1	1.3547	1.53466e-07	6.07639e-06	UP
Snx13	-0.631279	1.5409e-07	6.08557e-06	DOWN
Ddx54	0.836873	1.55913e-07	6.14195e-06	UP
C330018D20Rik	-0.84055	1.56381e-07	6.1448e-06	DOWN
Tmem126b	-0.873604	1.57335e-07	6.16666e-06	DOWN
Ap5z1	-1.1275	1.5962e-07	6.24047e-06	DOWN
Mcemp1	3.07121	1.66718e-07	6.50158e-06	UP
Hbegf	2.86575	1.67693e-07	6.51334e-06	UP
Eno3	-0.773331	1.67859e-07	6.51334e-06	DOWN
Hdac2	-0.414573	1.69609e-07	6.56482e-06	DOWN
Cxcr6	3.42043	1.74269e-07	6.70835e-06	UP
Csf2ra	1.36874	1.74587e-07	6.70835e-06	UP
Ccdc91	-0.508174	1.74613e-07	6.70835e-06	DOWN
Yars	0.693349	1.78431e-07	6.83809e-06	UP
Mtfr1	-0.547302	1.85925e-07	7.10775e-06	DOWN
Fam91a1	0.562483	1.89687e-07	7.22929e-06	UP
Actg1	1.3461	1.90036e-07	7.22929e-06	UP
Slc39a13	0.73559	1.9098e-07	7.24745e-06	UP
Mef2a	-0.470315	1.92598e-07	7.29099e-06	DOWN
Apip	-0.800859	1.98129e-07	7.48213e-06	DOWN
Dcaf4	-1.32784	2.09453e-07	7.89059e-06	DOWN
Mettl5	-0.979405	2.12625e-07	7.99068e-06	DOWN
Smim11	-0.778498	2.14155e-07	8.02876e-06	DOWN
Utp18	0.78508	2.15539e-07	8.06117e-06	UP
Sh2b2	2.94382	2.20718e-07	8.235e-06	UP
Ehd4	0.979775	2.24487e-07	8.35556e-06	UP
Nicn1	-0.847395	2.26916e-07	8.42574e-06	DOWN
Actb	1.16302	2.28531e-07	8.46547e-06	UP
Hnmt	-1.2348	2.44427e-07	9.02188e-06	DOWN
Mrto4	0.720516	2.44714e-07	9.02188e-06	UP
Pde7a	-1.10801	2.55734e-07	9.4058e-06	DOWN
Fem1b	0.823462	2.56431e-07	9.40613e-06	UP
Mmp14	1.42506	2.56955e-07	9.40613e-06	UP
Rbbp9	-0.580579	2.59701e-07	9.46466e-06	DOWN
Ahrr	-2.34957	2.59774e-07	9.46466e-06	DOWN
Itgb6	-1.97508	2.66047e-07	9.67054e-06	DOWN
Pttg1	-0.751126	2.69595e-07	9.77661e-06	DOWN
Mmachc	-0.619271	2.71057e-07	9.8067e-06	DOWN
Ppm1k	-1.12767	2.74265e-07	9.89969e-06	DOWN
Gcdh	-0.714392	2.76404e-07	9.95375e-06	DOWN
Star	1.3133	2.82826e-07	1.01614e-05	UP
Kpnb1	0.467482	2.85329e-07	1.02277e-05	UP
Eddm3b	14.5317	2.87353e-07	1.02765e-05	UP
Itfg1	-0.509828	2.94965e-07	1.0517e-05	DOWN
Otulin	0.661699	2.95433e-07	1.0517e-05	UP
Entpd5	-0.865239	3.04543e-07	1.08165e-05	DOWN
Hilpda	1.85336	3.05263e-07	1.08173e-05	UP
Klhl33	-1.80287	3.07464e-07	1.08705e-05	DOWN
Rrm2b	-0.659404	3.09522e-07	1.09184e-05	DOWN
Mblac2	-1.51655	3.10287e-07	1.09206e-05	DOWN
Ccdc28a	-1.07434	3.14788e-07	1.10539e-05	DOWN
Trim23	-0.578093	3.17826e-07	1.11354e-05	DOWN
Sirt2	-0.347197	3.20517e-07	1.12044e-05	DOWN
Mreg	-1.04449	3.29557e-07	1.14945e-05	DOWN
Itgb3	1.98622	3.35035e-07	1.16594e-05	UP
Hfe2	-0.715168	3.39502e-07	1.17884e-05	DOWN
Slc10a3	1.01488	3.40413e-07	1.17936e-05	UP
Bmp2	1.68778	3.41527e-07	1.18059e-05	UP
Kri1	0.681665	3.45083e-07	1.19023e-05	UP
Ccpg1	-0.677745	3.52814e-07	1.2142e-05	DOWN
Il17ra	2.57265	3.56477e-07	1.22409e-05	UP
Ccdc141	-0.69738	3.63087e-07	1.24403e-05	DOWN
Flnb	1.28026	3.72926e-07	1.27493e-05	UP
Bphl	-0.742418	3.78216e-07	1.29017e-05	DOWN
Bbs7	-0.952465	3.83864e-07	1.30657e-05	DOWN
Map2k3	0.689986	3.86889e-07	1.31399e-05	UP
Rnf19b	0.98569	3.92987e-07	1.33005e-05	UP
Mical2	1.42963	3.93332e-07	1.33005e-05	UP
Ppp1r18	1.20093	3.94392e-07	1.33073e-05	UP
Plaur	3.42121	3.99308e-07	1.34439e-05	UP
Ccni	-0.559734	4.02384e-07	1.35182e-05	DOWN
Edem1	0.934995	4.14244e-07	1.38728e-05	UP
Malt1	0.78489	4.14727e-07	1.38728e-05	UP
Eid2b	-0.78528	4.17288e-07	1.39284e-05	DOWN
Casp8	1.00612	4.25544e-07	1.41735e-05	UP
Chil3	3.6771	4.26611e-07	1.41787e-05	UP
Angpt2	2.08691	4.28205e-07	1.41847e-05	UP
Ttc33	-0.485125	4.28621e-07	1.41847e-05	DOWN
Srek1ip1	-0.689967	4.58729e-07	1.51488e-05	DOWN
Nras	0.715475	4.68171e-07	1.54278e-05	UP
Penk	-1.87438	4.69767e-07	1.54476e-05	DOWN
Fam92a	-0.872527	4.92294e-07	1.61541e-05	DOWN
Myd88	0.854677	5.03689e-07	1.64932e-05	UP
Tmem260	-0.67518	5.10219e-07	1.66718e-05	DOWN
Lrrcc1	-0.975159	5.17069e-07	1.68601e-05	DOWN
Crebrf	-0.938917	5.19738e-07	1.69116e-05	DOWN
Wdfy1	0.618066	5.22069e-07	1.6952e-05	UP
Rbl2	-0.769314	5.80135e-07	1.87981e-05	DOWN
Mcee	-0.740168	5.91047e-07	1.91005e-05	DOWN
Tbc1d10b	0.528816	5.92703e-07	1.91005e-05	UP
Tceal1	-1.14311	5.93495e-07	1.91005e-05	DOWN
Zkscan7	-1.26543	5.94391e-07	1.91005e-05	DOWN
2810006K23Rik	-1.00165	5.98314e-07	1.91868e-05	DOWN
Ube2e3	-0.489858	6.05365e-07	1.93729e-05	DOWN
Nes	1.86164	6.07794e-07	1.94004e-05	UP
Pyurf	-0.698576	6.08722e-07	1.94004e-05	DOWN
Cdc73	-0.513082	6.13608e-07	1.9516e-05	DOWN
Rin1	1.90408	6.19598e-07	1.96655e-05	UP
Tubb4b	1.03304	6.20843e-07	1.96655e-05	UP
Ifitm1	1.50906	6.2304e-07	1.96949e-05	UP
Gm16286	0.511	6.26063e-07	1.97503e-05	UP
Dmac2	-0.629923	6.32095e-07	1.99001e-05	DOWN
Iqgap1	0.971897	6.36811e-07	2.0008e-05	UP
Ivns1abp	-0.993518	6.51848e-07	2.0439e-05	DOWN
Acot9	0.895532	6.53323e-07	2.0444e-05	UP
Rdh10	0.851694	6.87288e-07	2.14636e-05	UP
Frg2f1	-1.40098	6.93748e-07	2.16218e-05	DOWN
Kcnj3	-1.34804	6.98747e-07	2.1734e-05	DOWN
Ppbp	2.24787	7.05895e-07	2.19124e-05	UP
Bzw2	-0.657843	7.36788e-07	2.28257e-05	DOWN
Prorsd1	-0.62365	7.6929e-07	2.37639e-05	DOWN
Zwint	0.674053	7.70133e-07	2.37639e-05	UP
Ano4	-1.51909	7.80035e-07	2.40217e-05	DOWN
Trp53	0.872612	7.89391e-07	2.4223e-05	UP
Mospd1	-1.00949	7.89695e-07	2.4223e-05	DOWN
Tgfb2	1.7957	7.97804e-07	2.44235e-05	UP
Smim10l1	-0.626877	8.08569e-07	2.47043e-05	DOWN
Vdac3	-0.459051	8.22331e-07	2.50418e-05	DOWN
Pts	-0.829952	8.23444e-07	2.50418e-05	DOWN
Slc30a4	0.723872	8.24454e-07	2.50418e-05	UP
Pum3	0.730373	8.28738e-07	2.51227e-05	UP
Rae1	0.630057	8.44424e-07	2.54721e-05	UP
Hs3st5	-1.86433	8.45242e-07	2.54721e-05	DOWN
Sh2d5	5.63757	8.45754e-07	2.54721e-05	UP
Plekho2	1.54553	8.46826e-07	2.54721e-05	UP
Ptk2b	0.921765	8.53277e-07	2.56165e-05	UP
Cmtm8	-1.22103	8.70366e-07	2.60791e-05	DOWN
Chst11	1.44953	8.74026e-07	2.61383e-05	UP
Mpv17	-0.528842	8.8068e-07	2.62866e-05	DOWN
Mrpl44	-0.470021	8.97202e-07	2.67283e-05	DOWN
Xirp2	1.66057	9.05169e-07	2.6914e-05	UP
Cngb3	-2.12277	9.1272e-07	2.70867e-05	DOWN
Gmip	1.30213	9.23477e-07	2.73219e-05	UP
BC005624	-0.542005	9.24166e-07	2.73219e-05	DOWN
Nlrp12	4.74659	9.41161e-07	2.77714e-05	UP
Tmem242	-0.510006	9.43505e-07	2.77877e-05	DOWN
Mrpl18	-0.507136	9.4936e-07	2.79072e-05	DOWN
Klra2	2.74125	9.60231e-07	2.81734e-05	UP
Hp1bp3	-0.332601	9.93787e-07	2.9103e-05	DOWN
Pgm2	1.11067	1.01486e-06	2.9664e-05	UP
Rrp8	0.727894	1.04715e-06	3.05503e-05	UP
Socs3	1.96974	1.07208e-06	3.12192e-05	UP
Nop14	0.643514	1.09291e-06	3.17662e-05	UP
Ltbr	0.616489	1.12527e-06	3.26455e-05	UP
Eif5	0.695221	1.13831e-06	3.29621e-05	UP
Fosl2	1.34707	1.14272e-06	3.30281e-05	UP
Slc15a3	1.97952	1.16935e-06	3.36798e-05	UP
Lamtor5	-0.49526	1.16984e-06	3.36798e-05	DOWN
Ppp2cb	0.483392	1.17177e-06	3.36798e-05	UP
Atp2c1	-0.538382	1.18936e-06	3.4082e-05	DOWN
Cers2	0.645399	1.1906e-06	3.4082e-05	UP
Nfib	-0.494147	1.19235e-06	3.4082e-05	DOWN
Dhfr	-1.00821	1.21005e-06	3.45243e-05	DOWN
Ccdc88b	2.0183	1.22554e-06	3.49021e-05	UP
Bbs2	-0.862431	1.23132e-06	3.50024e-05	DOWN
Fgd3	1.88745	1.24255e-06	3.52571e-05	UP
Lrrc61	-0.904203	1.24736e-06	3.53289e-05	DOWN
Rnf4	0.693307	1.27447e-06	3.6031e-05	UP
Fcgr4	1.80746	1.2935e-06	3.65026e-05	UP
Ddx56	0.645156	1.30936e-06	3.6883e-05	UP
Alcam	1.27572	1.31712e-06	3.70343e-05	UP
Diaph1	0.706024	1.34089e-06	3.76345e-05	UP
Rapgef1	0.820878	1.34373e-06	3.76462e-05	UP
Nadk	0.718878	1.38479e-06	3.86163e-05	UP
Cd53	1.58699	1.38509e-06	3.86163e-05	UP
Bmp10	-7.43435	1.38582e-06	3.86163e-05	DOWN
Plek	1.69579	1.39719e-06	3.88633e-05	UP
Lynx1	-0.699025	1.4056e-06	3.90273e-05	DOWN
Atp8a1	-0.824017	1.4584e-06	4.04212e-05	DOWN
Nudt13	-0.684501	1.46187e-06	4.0445e-05	DOWN
Twf1	0.482771	1.48416e-06	4.09887e-05	UP
Rhot2	-0.632987	1.49339e-06	4.11704e-05	DOWN
I830077J02Rik	1.64234	1.52433e-06	4.19488e-05	UP
Clcc1	-0.501189	1.58303e-06	4.34872e-05	DOWN
Snai1	1.90864	1.59468e-06	4.37297e-05	UP
Pygl	1.17228	1.61938e-06	4.43287e-05	UP
Gspt1	0.375885	1.62862e-06	4.45031e-05	UP
Brd9	-0.42539	1.63422e-06	4.45778e-05	DOWN
Rmnd1	-0.868465	1.65141e-06	4.48921e-05	DOWN
Tmem25	-1.74687	1.65153e-06	4.48921e-05	DOWN
2200002D01Rik	2.09667	1.67494e-06	4.54488e-05	UP
Gal3st2c	-1.60628	1.69462e-06	4.58946e-05	DOWN
Ppp1r14b	0.857234	1.69728e-06	4.58946e-05	UP
Dhx32	0.630709	1.70646e-06	4.6048e-05	UP
Nol11	0.470966	1.70889e-06	4.6048e-05	UP
Laptm4a	-0.449693	1.74208e-06	4.6861e-05	DOWN
Clasp2	-0.546332	1.75311e-06	4.70762e-05	DOWN
Asb14	-1.25774	1.79003e-06	4.79845e-05	DOWN
Egln1	-0.609057	1.80244e-06	4.8234e-05	DOWN
Mcam	1.3772	1.80966e-06	4.82765e-05	UP
Surf6	0.714064	1.81025e-06	4.82765e-05	UP
Tcp11l2	-1.06961	1.83021e-06	4.86976e-05	DOWN
Atf3	2.63698	1.83385e-06	4.86976e-05	UP
Pex7	-0.527823	1.83546e-06	4.86976e-05	DOWN
Tnnt3	3.03132	1.85291e-06	4.90767e-05	UP
Atic	0.496417	1.8594e-06	4.91647e-05	UP
Rad23b	0.371487	1.93027e-06	5.0952e-05	UP
Lonrf2	-1.09617	1.93957e-06	5.11106e-05	DOWN
Bcar1	1.07463	1.95219e-06	5.13558e-05	UP
Mcfd2	1.55136	1.96071e-06	5.14926e-05	UP
Atg10	-0.96171	1.96964e-06	5.16397e-05	DOWN
Tnfrsf26	1.88123	1.9978e-06	5.22899e-05	UP
Dnaja2	-0.430449	2.00938e-06	5.25042e-05	DOWN
Elovl1	0.832327	2.0278e-06	5.28966e-05	UP
Zfp513	0.722003	2.0486e-06	5.33495e-05	UP
Gatad1	-0.447957	2.05931e-06	5.35387e-05	DOWN
Trim30b	2.83542	2.1007e-06	5.45234e-05	UP
Tlr13	2.02049	2.11616e-06	5.48328e-05	UP
Cryzl1	-0.574534	2.17469e-06	5.62556e-05	DOWN
Itgam	2.12812	2.21331e-06	5.71593e-05	UP
Rtn4ip1	-0.697147	2.24633e-06	5.79158e-05	DOWN
Fgd4	-1.21157	2.25032e-06	5.79223e-05	DOWN
Chpf2	0.932709	2.27065e-06	5.83489e-05	UP
Cmya5	-1.00559	2.29872e-06	5.89209e-05	DOWN
Osgep	-0.787634	2.3005e-06	5.89209e-05	DOWN
Fstl3	3.37515	2.33585e-06	5.97276e-05	UP
Ss18l2	-0.563219	2.376e-06	6.06544e-05	DOWN
Nip7	0.770365	2.40449e-06	6.12231e-05	UP
Ddx27	0.646641	2.40872e-06	6.12231e-05	UP
Rpa1	-0.586888	2.41011e-06	6.12231e-05	DOWN
Clcn4	-0.359526	2.44701e-06	6.2059e-05	DOWN
Churc1	-0.490321	2.45425e-06	6.21409e-05	DOWN
Havcr2	2.07117	2.46907e-06	6.24145e-05	UP
Tmem14c	-0.547513	2.51258e-06	6.33858e-05	DOWN
Coro1c	1.06638	2.51567e-06	6.33858e-05	UP
Slc38a9	-0.541981	2.53902e-06	6.38705e-05	DOWN
Ncf1	1.48733	2.57266e-06	6.46122e-05	UP
Gpr132	3.44871	2.58498e-06	6.48166e-05	UP
Sdad1	0.649881	2.61242e-06	6.53991e-05	UP
Tubb5	1.00339	2.62218e-06	6.55092e-05	UP
Cog7	-0.586644	2.62527e-06	6.55092e-05	DOWN
Mob1a	0.539728	2.70493e-06	6.73889e-05	UP
Fam129b	1.29649	2.71247e-06	6.74684e-05	UP
Impdh2	0.484456	2.79982e-06	6.95297e-05	UP
Rnf166	-0.773529	2.84297e-06	7.04884e-05	DOWN
Piwil2	1.45708	2.86647e-06	7.09577e-05	UP
Lsm14b	-0.510664	2.8744e-06	7.10408e-05	DOWN
B230118H07Rik	-0.632676	2.89213e-06	7.13652e-05	DOWN
Narf	-0.721114	2.90898e-06	7.16671e-05	DOWN
Pex10	-0.716815	2.95992e-06	7.28066e-05	DOWN
Flad1	-0.764036	3.0185e-06	7.41298e-05	DOWN
Ipp	-0.654463	3.0439e-06	7.46357e-05	DOWN
Zswim4	0.985922	3.10843e-06	7.60976e-05	UP
Atp13a3	0.836783	3.14792e-06	7.69431e-05	UP
Ascc2	0.534084	3.18457e-06	7.77165e-05	UP
Trim30d	1.17874	3.19222e-06	7.7781e-05	UP
Des	0.811725	3.19765e-06	7.77911e-05	UP
Ostm1	-0.662524	3.34814e-06	8.13247e-05	DOWN
Nek6	1.38285	3.41825e-06	8.2898e-05	UP
Dhtkd1	-1.18462	3.42904e-06	8.30298e-05	DOWN
Rps6ka4	0.603268	3.47031e-06	8.38983e-05	UP
Taz	-0.675248	3.51608e-06	8.48726e-05	DOWN
Cd177	6.05282	3.58153e-06	8.63182e-05	UP
Serpina1c	5.40448	3.64107e-06	8.7617e-05	UP
Tnfrsf1a	0.725826	3.73764e-06	8.98016e-05	UP
Notch1	0.802093	3.75107e-06	8.99851e-05	UP
Zfp943	-0.619884	3.88667e-06	9.30942e-05	DOWN
Lmtk2	-0.449411	3.93913e-06	9.42053e-05	DOWN
Dpysl3	1.24351	3.95973e-06	9.44384e-05	UP
Ikbke	1.41937	3.96105e-06	9.44384e-05	UP
Mtrf1	-0.660427	3.98572e-06	9.4881e-05	DOWN
Gm572	-1.02598	4.01153e-06	9.5349e-05	DOWN
Cd44	1.81002	4.02872e-06	9.56113e-05	UP
Fbxo3	-0.475543	4.09712e-06	9.70861e-05	DOWN
Ttc37	0.837372	4.12732e-06	9.76528e-05	UP
Itgal	1.88578	4.17148e-06	9.85472e-05	UP
Atp6v1b2	0.477627	4.20476e-06	9.91825e-05	UP
March6	-0.531887	4.22801e-06	9.95795e-05	DOWN
Sv2b	1.67946	4.28145e-06	0.000100685	UP
Sphk1	2.8461	4.29212e-06	0.000100784	UP
Mapk1	-0.371204	4.38127e-06	0.000102722	DOWN
Csnk1d	0.424356	4.39396e-06	0.000102864	UP
Haus1	-0.680306	4.45677e-06	0.000104177	DOWN
Fbxo8	-0.543703	4.504e-06	0.000104934	DOWN
Suds3	-0.444678	4.5059e-06	0.000104934	DOWN
Kctd11	1.44267	4.50943e-06	0.000104934	UP
Ptrh1	1.43238	4.57776e-06	0.000106364	UP
Kdm5c	0.673579	4.64281e-06	0.000107655	UP
Nectin1	1.39653	4.64719e-06	0.000107655	UP
Dlgap4	0.598664	4.76539e-06	0.000110229	UP
Plk5	-2.54448	4.8264e-06	0.000111474	DOWN
Nppb	2.29847	4.83536e-06	0.000111515	UP
Cmc4	-1.02463	4.84415e-06	0.000111552	DOWN
Rab35	0.515165	4.86278e-06	0.000111815	UP
Magi1	0.740734	4.90066e-06	0.000112519	UP
Rela	0.495819	4.94568e-06	0.000113385	UP
Hexa	-0.581617	4.98314e-06	0.000114076	DOWN
Rogdi	-0.88887	4.99453e-06	0.000114168	DOWN
Kbtbd3	-0.77478	5.03864e-06	0.000115007	DOWN
Rfc1	-0.525684	5.20354e-06	0.000118596	DOWN
Osm	3.44693	5.29759e-06	0.000120563	UP
Ms4a8a	2.40168	5.34012e-06	0.000121353	UP
Tmem106b	-0.588205	5.35181e-06	0.000121441	DOWN
Slc35e4	1.4099	5.36328e-06	0.000121443	UP
Txndc16	-1.02161	5.36755e-06	0.000121443	DOWN
Wisp1	1.77797	5.48207e-06	0.000123853	UP
Ppp1r10	1.26787	5.51872e-06	0.000124432	UP
Mipep	-0.591032	5.52371e-06	0.000124432	DOWN
Cenpf	-2.03443	5.74219e-06	0.000129166	DOWN
Nt5c3	-0.739468	6.03802e-06	0.000135624	DOWN
9030612E09Rik	-1.39804	6.05184e-06	0.000135738	DOWN
Cyp1a1	-4.65062	6.12132e-06	0.000137098	DOWN
Myef2	0.911912	6.17444e-06	0.000138089	UP
Ankib1	0.573419	6.20626e-06	0.000138409	UP
Rnf13	-0.562883	6.2066e-06	0.000138409	DOWN
Ranbp1	0.701393	6.22106e-06	0.000138495	UP
1810010H24Rik	-2.01564	6.22831e-06	0.000138495	DOWN
Cmip	0.902797	6.25944e-06	0.000138988	UP
Wsb2	0.52771	6.3065e-06	0.000139724	UP
Ung	-1.11459	6.31058e-06	0.000139724	DOWN
U2af2	0.60214	6.3508e-06	0.000140414	UP
Tbc1d32	-1.04724	6.3809e-06	0.000140879	DOWN
Baalc	2.0347	6.40002e-06	0.000141101	UP
Mthfd2	2.13443	6.42379e-06	0.000141424	UP
Siglece	1.86404	6.44797e-06	0.000141755	UP
Slc2a8	-0.704455	6.46597e-06	0.000141949	DOWN
Sbf1	0.502981	6.47753e-06	0.000142003	UP
Slc6a6	1.35127	6.55942e-06	0.000143595	UP
Eif2s2	0.379664	6.57589e-06	0.000143753	UP
Hmox1	1.81249	6.6096e-06	0.000144286	UP
Zfp706	-0.411154	6.65562e-06	0.000144991	DOWN
Ralb	0.610321	6.66058e-06	0.000144991	UP
Zfp949	-0.758188	6.67874e-06	0.000145183	DOWN
Grm1	-1.06087	6.75529e-06	0.000146566	DOWN
Zc3h12a	1.03515	6.76123e-06	0.000146566	UP
Tspan14	0.55568	6.77648e-06	0.000146691	UP
Lrrc2	-0.849585	6.80164e-06	0.000147031	DOWN
Trp53i11	1.74755	6.84579e-06	0.00014778	UP
Sirt5	-0.624045	6.92943e-06	0.000149377	DOWN
Cox20	-0.741302	6.95723e-06	0.000149563	DOWN
Tmem86a	-1.14773	6.95789e-06	0.000149563	DOWN
Mrpl11	-0.559926	6.97518e-06	0.000149563	DOWN
Eef1a1	0.555355	6.97657e-06	0.000149563	UP
Rdh14	-0.588104	7.02298e-06	0.00015035	DOWN
Hmgn2	-0.905865	7.04923e-06	0.000150704	DOWN
Apln	2.79728	7.07797e-06	0.00015111	UP
Prps2	-1.18086	7.10606e-06	0.000151502	DOWN
Glod4	-0.554979	7.16326e-06	0.000152512	DOWN
Atp5s	-0.771835	7.27929e-06	0.000154701	DOWN
Fam57a	1.18833	7.28601e-06	0.000154701	UP
Nacc1	0.648931	7.34055e-06	0.000155646	UP
Ift172	-0.543029	7.42811e-06	0.000157288	DOWN
Mup11	6.04666	7.60297e-06	0.000160771	UP
Zfp39	-0.776608	7.62076e-06	0.000160928	DOWN
Fam19a3	-1.60079	7.69268e-06	0.000162226	DOWN
Gcnt2	1.10728	7.76785e-06	0.000163456	UP
Zmat1	-1.08482	7.77209e-06	0.000163456	DOWN
Sgca	-0.678844	7.81791e-06	0.000164197	DOWN
Nrip3	3.71406	7.82904e-06	0.000164209	UP
Tbc1d10c	-1.62788	7.88478e-06	0.000165155	DOWN
Oasl1	1.6203	8.02156e-06	0.000167793	UP
Lipg	3.90912	8.11636e-06	0.000169548	UP
Amotl1	1.09278	8.38691e-06	0.000174964	UP
Coprs	-0.711697	8.42879e-06	0.000175602	DOWN
Efnb3	-1.43192	8.5186e-06	0.000177235	DOWN
Agmat	-2.50393	8.61489e-06	0.000178998	DOWN
Oxsm	-0.614966	8.67341e-06	0.000179973	DOWN
Prkdc	-0.762556	8.82064e-06	0.000182784	DOWN
Cep89	-0.818973	8.89515e-06	0.000184082	DOWN
2210016F16Rik	-0.565125	8.908e-06	0.000184103	DOWN
Lrp8	3.18357	9.02142e-06	0.000186199	UP
Rsrc1	-0.549275	9.14032e-06	0.000188167	DOWN
Setd3	-0.362408	9.14854e-06	0.000188167	DOWN
Tor1aip2	0.433186	9.15316e-06	0.000188167	UP
A530016L24Rik	-1.58407	9.17496e-06	0.000188366	DOWN
Dhx8	0.647995	9.1922e-06	0.00018847	UP
Nubp1	0.673645	9.31367e-06	0.000190709	UP
Ccng2	-0.873943	9.4458e-06	0.00019316	DOWN
Trim16	1.93179	9.49831e-06	0.000193978	UP
Pitpnc1	-0.851506	9.52793e-06	0.000194327	DOWN
Sertad1	1.19398	9.7778e-06	0.000199078	UP
Gtpbp10	-0.529245	9.79194e-06	0.000199078	DOWN
E130311K13Rik	-0.881802	9.80999e-06	0.000199078	DOWN
Ppa2	-0.643788	9.81218e-06	0.000199078	DOWN
Mrps33	-0.495398	9.83651e-06	0.000199311	DOWN
As3mt	-0.770583	9.9214e-06	0.000200769	DOWN
Tmem126a	-0.480162	9.95049e-06	0.000201096	DOWN
Kit	3.20954	1.00689e-05	0.000203225	UP
Acy3	-0.906064	1.01651e-05	0.000204899	DOWN
Raver2	-1.26229	1.02045e-05	0.000205428	DOWN
Rcc2	0.921375	1.02669e-05	0.000206415	UP
Acad12	-0.832962	1.0284e-05	0.000206492	DOWN
1110002E22Rik	1.64929	1.03064e-05	0.000206674	UP
Igfbp3	1.68532	1.03667e-05	0.000207616	UP
Armc2	-2.14408	1.04656e-05	0.000209326	DOWN
Cbr1	-0.867616	1.05261e-05	0.000210265	DOWN
Mvp	0.673199	1.07219e-05	0.000213901	UP
Pkia	-0.729871	1.09462e-05	0.000218095	DOWN
Opcml	-1.58887	1.10134e-05	0.000218881	DOWN
Cbx7	-0.908112	1.10139e-05	0.000218881	DOWN
Ripk1	0.586217	1.11736e-05	0.000221772	UP
Zfp759	-0.942015	1.11927e-05	0.000221868	DOWN
Opa1	-0.579079	1.13478e-05	0.000224654	DOWN
Pik3r5	1.65025	1.14716e-05	0.000226817	UP
Tmem65	-0.646052	1.14957e-05	0.000227004	DOWN
Ttc21b	-0.979562	1.17089e-05	0.000230919	DOWN
Nfkbiz	1.24445	1.17282e-05	0.000231007	UP
Lgals3	1.61675	1.17803e-05	0.000231739	UP
Zfand6	-0.648909	1.19041e-05	0.000233878	DOWN
Tubb2a	1.76286	1.20806e-05	0.000237046	UP
Igbp1	-0.434518	1.21383e-05	0.000237877	DOWN
Hspa1l	0.769597	1.21753e-05	0.0002383	UP
Smim20	-0.644489	1.22652e-05	0.000239758	DOWN
Nnt	-0.517422	1.2399e-05	0.000242029	DOWN
U2af1	0.668027	1.24125e-05	0.000242029	UP
Mafk	1.08714	1.24973e-05	0.000243376	UP
S100a11	1.13392	1.25948e-05	0.000244968	UP
Nol10	0.713403	1.26816e-05	0.000246347	UP
Hpf1	-0.929838	1.27709e-05	0.000247771	DOWN
Gm10762	-0.918015	1.30795e-05	0.000253442	DOWN
Slc4a2	0.550324	1.31103e-05	0.000253723	UP
Ppp3cb	-0.314158	1.31393e-05	0.000253966	DOWN
Gmfb	0.458593	1.32675e-05	0.000256126	UP
Zbp1	1.31763	1.34148e-05	0.000258647	UP
Slf1	-0.661128	1.34446e-05	0.0002589	DOWN
Snai3	-2.3552	1.35078e-05	0.000259794	DOWN
Sdhaf3	-0.608438	1.35439e-05	0.000260156	DOWN
Samd4b	0.633212	1.35601e-05	0.000260156	UP
Zfp799	-0.767811	1.37273e-05	0.000263039	DOWN
Cdk9	0.520416	1.38148e-05	0.000264389	UP
Fosl1	2.60214	1.39638e-05	0.000266911	UP
Actr3b	-1.34197	1.40859e-05	0.000268914	DOWN
Nfix	-0.521179	1.41235e-05	0.000269302	DOWN
Gm11992	-2.35232	1.41777e-05	0.000270002	DOWN
Coro1a	1.48722	1.43175e-05	0.000272331	UP
Rtf1	-0.359251	1.43566e-05	0.000272739	DOWN
Hsh2d	4.89938	1.43946e-05	0.000273127	UP
Gtf2f1	0.671755	1.45149e-05	0.000275075	UP
Slc25a38	-0.673488	1.46147e-05	0.000276627	DOWN
Osbp2	-1.572	1.46976e-05	0.000277859	DOWN
Cyp4f18	2.33637	1.47341e-05	0.000277978	UP
Xirp1	1.4755	1.47398e-05	0.000277978	UP
2310022B05Rik	0.565592	1.48084e-05	0.000278934	UP
Ube2a	-0.503691	1.51208e-05	0.000284473	DOWN
Tstd3	-0.818293	1.5387e-05	0.00028913	DOWN
Pdlim7	1.17167	1.56027e-05	0.000292829	UP
Sdcbp	0.476357	1.57082e-05	0.000294403	UP
Ccpg1os	-1.11339	1.57245e-05	0.000294403	DOWN
Lrpprc	-0.567289	1.58056e-05	0.000295565	DOWN
Maob	-0.918154	1.58451e-05	0.000295947	DOWN
Lmbr1	-0.666271	1.59594e-05	0.000297723	DOWN
Stk40	0.735282	1.6395e-05	0.000305482	UP
Paics	-0.419975	1.6591e-05	0.000308764	DOWN
F7	1.66701	1.67939e-05	0.000312165	UP
Dglucy	-1.13872	1.69931e-05	0.000315489	DOWN
L3hypdh	-1.25304	1.70466e-05	0.000316106	DOWN
Ruvbl1	0.554679	1.71398e-05	0.000317454	UP
Upf3b	-0.663653	1.72468e-05	0.000318778	DOWN
Aarsd1	-0.570518	1.72523e-05	0.000318778	DOWN
Pdcd4	-0.88103	1.7985e-05	0.00033192	DOWN
Csk	0.689996	1.80164e-05	0.000332028	UP
Bcat1	1.86644	1.80336e-05	0.000332028	UP
Ptpn1	0.844777	1.80817e-05	0.000332519	UP
Fgf23	5.87596	1.81346e-05	0.000333098	UP
Gatad2a	0.687124	1.84771e-05	0.000338987	UP
Pfkp	1.36653	1.85151e-05	0.000339284	UP
Rpl11	0.386508	1.85764e-05	0.000340006	UP
Pdcd6ip	0.37374	1.86053e-05	0.000340026	UP
Slc39a6	1.12613	1.86428e-05	0.000340026	UP
Oxnad1	-0.679035	1.86433e-05	0.000340026	DOWN
Myoz1	3.3501	1.88235e-05	0.000342909	UP
Mmaa	-0.76654	1.88561e-05	0.000343102	DOWN
Xbp1	0.75176	1.89171e-05	0.000343808	UP
Ascc1	-0.550401	1.91413e-05	0.000347477	DOWN
Adam8	3.12017	1.98862e-05	0.000360573	UP
Iigp1	-1.19399	1.99092e-05	0.000360573	DOWN
Cnga3	-1.49255	1.9991e-05	0.000361631	DOWN
Senp5	3.60504	2.02412e-05	0.000365731	UP
Ctso	-0.793236	2.04716e-05	0.000369465	DOWN
Zfp335	0.671272	2.0643e-05	0.000371964	UP
Pik3ip1	-1.46766	2.0658e-05	0.000371964	DOWN
Rpl18a	0.708191	2.08723e-05	0.000375387	UP
Rsph3b	-0.537392	2.10764e-05	0.00037862	DOWN
Zfp952	-0.821491	2.11107e-05	0.000378796	DOWN
Ube2d1	-0.569648	2.11674e-05	0.000379142	DOWN
Naa35	-0.392153	2.11788e-05	0.000379142	DOWN
Ky	-1.76833	2.12679e-05	0.000380299	DOWN
Tex261	-0.401997	2.1301e-05	0.000380452	DOWN
Lyst	0.887278	2.1472e-05	0.000383066	UP
Popdc3	0.586394	2.15821e-05	0.000384384	UP
Morn2	-0.854669	2.16041e-05	0.000384384	DOWN
Gid4	-0.549523	2.16202e-05	0.000384384	DOWN
Csde1	-0.442627	2.18306e-05	0.00038768	DOWN
Litaf	1.3636	2.18828e-05	0.000388163	UP
Grtp1	-1.43533	2.21968e-05	0.000393284	DOWN
Trim72	-0.441264	2.24216e-05	0.000396814	DOWN
D16Ertd472e	2.36091	2.26453e-05	0.000400316	UP
Oxld1	-0.988758	2.27896e-05	0.000402409	DOWN
Pln	-1.04999	2.28686e-05	0.000403344	DOWN
Smarca2	-0.574573	2.29583e-05	0.000404467	DOWN
Ndufaf1	-0.636127	2.33021e-05	0.00041006	DOWN
Nrap	0.788794	2.33401e-05	0.000410263	UP
Dhrs3	-0.940978	2.34483e-05	0.000411698	DOWN
Shisa5	0.708054	2.37894e-05	0.000417215	UP
Zfp865	1.08364	2.38627e-05	0.000418028	UP
Cir1	-0.582248	2.39187e-05	0.000418537	DOWN
Fxyd5	1.49703	2.41051e-05	0.000421324	UP
Rps6ka5	-1.15242	2.41444e-05	0.000421536	DOWN
Pom121	0.611342	2.41782e-05	0.000421651	UP
Hacl1	-1.3781	2.43799e-05	0.000424692	DOWN
Pard3	-0.499536	2.44858e-05	0.000426058	DOWN
Foxo4	-0.518831	2.46338e-05	0.000428154	DOWN
Angpt1	-1.2308	2.48249e-05	0.000430992	DOWN
Polr2b	-0.283804	2.49419e-05	0.000432539	DOWN
Nle1	1.28795	2.54191e-05	0.000440324	UP
Hist1h2bc	-0.569868	2.56436e-05	0.000443717	DOWN
Plxnb2	7.4738	2.57332e-05	0.000444771	UP
Sla	1.67855	2.5921e-05	0.000447519	UP
Smg9	0.851339	2.60915e-05	0.000449963	UP
Krt222	-1.27171	2.63538e-05	0.000453982	DOWN
Mical1	1.25593	2.65029e-05	0.000455503	UP
Tmem266	-1.34294	2.65038e-05	0.000455503	DOWN
Itgb1	0.683517	2.65301e-05	0.000455503	UP
Dpp4	-1.62744	2.66446e-05	0.000456962	DOWN
Acot13	-0.527295	2.6716e-05	0.000457681	DOWN
Naa30	-0.442145	2.67853e-05	0.000458363	DOWN
Glrx3	-0.526527	2.69719e-05	0.000460978	DOWN
Fsd2	-1.04249	2.69976e-05	0.000460978	DOWN
Asns	2.05568	2.70885e-05	0.000462022	UP
Gpsm1	-0.533231	2.71322e-05	0.00046226	DOWN
Atp8b4	2.09843	2.72023e-05	0.000462945	UP
Cacng6	-1.70189	2.76399e-05	0.000469879	DOWN
Mrpl49	-0.584635	2.7718e-05	0.00047069	DOWN
Psmd11	0.567658	2.77831e-05	0.00047107	UP
Morc2a	0.513481	2.78011e-05	0.00047107	UP
Htatsf1	-0.363576	2.82355e-05	0.000477427	DOWN
Ddx39b	0.602784	2.82377e-05	0.000477427	UP
Mtpn	0.567309	2.84118e-05	0.000479189	UP
Coq8a	-0.933004	2.84235e-05	0.000479189	DOWN
Gm8113	-1.03644	2.84346e-05	0.000479189	DOWN
Pus1	0.747444	2.86423e-05	0.000482165	UP
AB124611	1.63631	2.87377e-05	0.000483248	UP
Mup20	4.51203	2.89286e-05	0.000485931	UP
E2f3	0.634735	2.96321e-05	0.00049721	UP
Foxo3	-1.02752	2.97302e-05	0.000498318	DOWN
Trmt10a	0.861738	2.98023e-05	0.000498987	UP
Amer2	3.67721	3.00522e-05	0.000502629	UP
Wdr92	-0.649838	3.01101e-05	0.000503056	DOWN
Fgg	3.6209	3.05686e-05	0.000510167	UP
Cyb5d2	-0.800978	3.10838e-05	0.000518208	DOWN
Sdr42e1	-1.06367	3.11691e-05	0.000519073	DOWN
Pigg	-0.675896	3.13894e-05	0.000522092	DOWN
Zfp964	-0.973604	3.14177e-05	0.000522092	DOWN
Tmem220	-1.06028	3.15026e-05	0.000522943	DOWN
Dhx33	0.666999	3.17932e-05	0.000527204	UP
Tcirg1	1.26286	3.20657e-05	0.000531154	UP
Helz	-0.468648	3.21767e-05	0.000532425	DOWN
Abhd14a	-0.627652	3.23695e-05	0.000534778	DOWN
Zfp512	-0.587186	3.23878e-05	0.000534778	DOWN
Slfn8	1.06631	3.24483e-05	0.000535207	UP
Nup153	0.515614	3.26156e-05	0.000537396	UP
Capn7	-0.516819	3.29054e-05	0.000541595	DOWN
Utp15	0.655896	3.29745e-05	0.000542159	UP
Smyd5	0.92818	3.30244e-05	0.000542405	UP
Cct7	0.395248	3.3186e-05	0.000544017	UP
Tsen54	0.795562	3.31927e-05	0.000544017	UP
Tnrc6b	-0.51806	3.37252e-05	0.000552161	DOWN
Ccnb1ip1	-4.44098	3.42164e-05	0.000559614	DOWN
Bcl3	1.56971	3.42936e-05	0.000559997	UP
Hccs	-0.555502	3.4312e-05	0.000559997	DOWN
Smco4	-0.913978	3.49264e-05	0.000569425	DOWN
Pcyox1	-0.472064	3.50894e-05	0.000571483	DOWN
Ddo	-0.894144	3.52081e-05	0.000572815	DOWN
P2ry1	-1.20442	3.52453e-05	0.000572819	DOWN
Snx20	2.14313	3.53586e-05	0.000573461	UP
Arhgap1	0.477052	3.53985e-05	0.000573461	UP
Zswim9	-0.698525	3.54561e-05	0.000573461	DOWN
Cxcl10	3.07596	3.54687e-05	0.000573461	UP
1810055G02Rik	1.27986	3.54695e-05	0.000573461	UP
Sars	0.395742	3.60325e-05	0.000581957	UP
Nudt1	-0.851943	3.62043e-05	0.000584124	DOWN
Slc35a4	0.595122	3.6696e-05	0.000591442	UP
Ampd2	1.24575	3.67853e-05	0.000592266	UP
Mob3c	0.764181	3.68778e-05	0.000593141	UP
Tnfrsf1b	1.16561	3.70482e-05	0.000595264	UP
Timp1	1.92745	3.7464e-05	0.000600886	UP
Tnfaip1	0.552713	3.74755e-05	0.000600886	UP
Ccndbp1	-0.459352	3.77145e-05	0.000604094	DOWN
Sec61a1	0.920248	3.79621e-05	0.000607433	UP
Zfp874b	-0.910151	3.82125e-05	0.000610202	DOWN
Diablo	-0.345798	3.82138e-05	0.000610202	DOWN
Kat7	0.424233	3.83132e-05	0.000611161	UP
Mylk3	-0.557831	3.85841e-05	0.000614849	DOWN
Ffar2	2.92991	3.87469e-05	0.000616811	UP
Tmem14a	-1.38283	3.88323e-05	0.000617537	DOWN
Ier3	1.77512	3.89848e-05	0.000619328	UP
Sept9	0.99713	3.90532e-05	0.00061978	UP
Pex6	-0.860288	3.91521e-05	0.000620714	DOWN
Ppp1r15a	1.04322	3.92103e-05	0.000621003	UP
Tpm4	1.15585	3.94303e-05	0.000623851	UP
Polr1b	0.59764	3.98838e-05	0.000629703	UP
Tpp1	-0.449912	3.98886e-05	0.000629703	DOWN
Coq2	-0.388855	3.9933e-05	0.000629703	DOWN
Osbpl6	-1.17658	3.99787e-05	0.000629703	DOWN
Tfb2m	-0.5048	4.0003e-05	0.000629703	DOWN
Tut1	0.711035	4.01645e-05	0.000631284	UP
Ikzf2	-1.05838	4.01848e-05	0.000631284	DOWN
Ctbp2	0.589184	4.12407e-05	0.000647128	UP
Fam229b	-1.45384	4.12768e-05	0.000647128	DOWN
Arrdc4	0.808727	4.27346e-05	0.000669308	UP
Hnrnpa2b1	-0.40471	4.34006e-05	0.000679054	DOWN
Gpr27	-0.938294	4.34455e-05	0.000679071	DOWN
Psd4	2.27331	4.36127e-05	0.000680998	UP
E130309D02Rik	0.919854	4.38807e-05	0.000684494	UP
Mrps18b	0.657862	4.39975e-05	0.00068496	UP
Cotl1	1.19226	4.39988e-05	0.00068496	UP
Layn	0.954845	4.44497e-05	0.000690893	UP
Bdkrb2	2.33293	4.44689e-05	0.000690893	UP
Glis3	1.8468	4.45238e-05	0.000691053	UP
Reep5	-0.725868	4.52857e-05	0.000702177	DOWN
Spryd7	-0.522126	4.54755e-05	0.000704416	DOWN
Arl8a	0.527991	4.57673e-05	0.000708229	UP
Smpdl3a	-0.556169	4.58187e-05	0.000708319	DOWN
Phtf2	-0.556664	4.59803e-05	0.00071011	DOWN
Cop1	-0.315548	4.60921e-05	0.000711129	DOWN
Mapk1ip1l	0.395322	4.67886e-05	0.000721157	UP
Fundc1	-0.601822	4.69659e-05	0.000723172	DOWN
Rbbp8	-7.00225	4.70633e-05	0.00072382	DOWN
Col6a6	-1.6995	4.71012e-05	0.00072382	DOWN
Csrnp1	1.28306	4.71554e-05	0.000723935	UP
Dhrs7	-0.753821	4.74607e-05	0.000727902	DOWN
Cltb	0.664418	4.7606e-05	0.00072941	UP
Ddx41	0.491184	4.78582e-05	0.000732551	UP
Gm13889	1.84682	4.79801e-05	0.000733694	UP
Aimp2	0.521371	4.83707e-05	0.000738938	UP
Bbof1	-0.916881	4.86244e-05	0.000742083	DOWN
Fndc5	-1.02151	4.87779e-05	0.000743351	DOWN
Zmym5	-0.56318	4.88032e-05	0.000743351	DOWN
Fundc2	-0.532148	4.91256e-05	0.000747223	DOWN
Ubqln2	-0.404848	4.91537e-05	0.000747223	DOWN
Agtpbp1	-0.764116	4.95391e-05	0.000752345	DOWN
Yrdc	0.77292	4.96492e-05	0.000753279	UP
Stum	-1.56331	5.0031e-05	0.000758331	DOWN
Rnls	-0.839263	5.04809e-05	0.000764403	DOWN
Acad8	-0.54195	5.12983e-05	0.000776024	DOWN
Mme	-1.34459	5.1387e-05	0.000776609	DOWN
Abhd18	-0.973003	5.15895e-05	0.000778911	DOWN
Kcna7	-0.860586	5.17045e-05	0.000779888	DOWN
Rhoq	-0.580273	5.18555e-05	0.000781407	DOWN
Washc3	-0.481464	5.20962e-05	0.000784272	DOWN
Cd24a	1.78577	5.23879e-05	0.0007879	UP
Cpne2	1.24042	5.24443e-05	0.000787985	UP
Clec3b	-1.32004	5.35106e-05	0.000803228	DOWN
Tm9sf2	-0.334331	5.38843e-05	0.000808057	DOWN
Smim26	-0.704182	5.39472e-05	0.000808219	DOWN
Rhd	-1.29176	5.41524e-05	0.00081051	DOWN
Bod1	-0.323367	5.43856e-05	0.000813217	DOWN
Jmjd6	0.74973	5.47549e-05	0.000817887	UP
Isg15	1.24893	5.48033e-05	0.000817887	UP
Ubtd1	0.709614	5.57089e-05	0.000830602	UP
Slc5a1	-1.9492	5.60097e-05	0.000834287	DOWN
Npm1	0.440303	5.63266e-05	0.000838202	UP
Peli3	-1.50872	5.64232e-05	0.000838835	DOWN
Pilra	2.55913	5.67438e-05	0.000842794	UP
Pcbp1	0.375587	5.69346e-05	0.00084482	UP
Med4	-0.312821	5.70012e-05	0.000845001	DOWN
Blk	1.83045	5.75642e-05	0.000852532	UP
Rrp15	0.892426	5.7949e-05	0.000857286	UP
Cnr2	1.89782	5.79956e-05	0.000857286	UP
Rbmxl1	0.527239	5.81984e-05	0.000859465	UP
Arhgef7	0.471417	5.915e-05	0.000872687	UP
Klhl41	0.865469	5.92922e-05	0.000873955	UP
Fgb	3.40077	5.96707e-05	0.000878699	UP
Ptx3	2.05964	5.9742e-05	0.000878916	UP
Psg16	-0.549615	6.00013e-05	0.000881446	DOWN
Serpina1e	3.68827	6.00276e-05	0.000881446	UP
Rmdn3	-0.707422	6.01443e-05	0.000882325	DOWN
Rab32	1.17441	6.03155e-05	0.000884001	UP
Mif	0.811022	6.09688e-05	0.000892732	UP
Gfm2	-0.528345	6.12981e-05	0.000896709	DOWN
Akap2	1.56953	6.14904e-05	0.000898674	UP
Rrp9	0.676054	6.19985e-05	0.000905248	UP
Dok5	1.9592	6.23909e-05	0.000910122	UP
Tnip1	0.443917	6.31172e-05	0.000919852	UP
Peak1	0.90901	6.32012e-05	0.000920211	UP
Cyfip1	0.448428	6.3466e-05	0.000923202	UP
Mrpl40	-0.664512	6.38049e-05	0.000927262	DOWN
Rai2	-0.730026	6.39692e-05	0.000927988	DOWN
Rpl31	0.490709	6.39744e-05	0.000927988	UP
Ap4s1	-0.448901	6.42927e-05	0.000931734	DOWN
Apobr	1.97944	6.43949e-05	0.000932345	UP
Ttll4	1.26004	6.48569e-05	0.000936759	UP
Col4a2	1.3227	6.49678e-05	0.000936759	UP
2810004N23Rik	-0.387692	6.49788e-05	0.000936759	DOWN
Mrps36	-0.608674	6.49984e-05	0.000936759	DOWN
Acad11	-0.870112	6.50016e-05	0.000936759	DOWN
2210418O10Rik	-0.533941	6.51591e-05	0.000938158	DOWN
Cxcl1	2.3983	6.55151e-05	0.000942409	UP
Gm14296	-0.541328	6.58446e-05	0.000946272	DOWN
Gm20594	-1.35418	6.61438e-05	0.000949693	DOWN
D030056L22Rik	-0.65755	6.69485e-05	0.000960358	DOWN
Ube2i	0.349315	6.71445e-05	0.000962281	UP
Plxnb1	-1.27284	6.72619e-05	0.000963074	DOWN
Noc4l	0.648038	6.807e-05	0.000972521	UP
Epdr1	-0.78347	6.8105e-05	0.000972521	DOWN
Tarsl2	-0.800137	6.81097e-05	0.000972521	DOWN
Nolc1	0.770468	6.8477e-05	0.000976868	UP
Clns1a	0.314901	6.86884e-05	0.000978458	UP
Ganc	-0.868613	6.87146e-05	0.000978458	DOWN
Pdpk1	0.522451	6.98992e-05	0.000994413	UP
Apoa1	3.80717	7.0004e-05	0.000994993	UP
Ctla2a	1.13672	7.01145e-05	0.000995484	UP
Apeh	-0.513805	7.01669e-05	0.000995484	DOWN
Cog6	-0.517867	7.02982e-05	0.000996129	DOWN
Rbm18	0.602751	7.0347e-05	0.000996129	UP
Stx11	1.23639	7.04442e-05	0.000996129	UP
Tefm	-0.457829	7.0469e-05	0.000996129	DOWN
Zc3hav1	0.450375	7.08837e-05	0.00100108	UP
Pabpc4	-0.471213	7.1164e-05	0.00100412	DOWN
Mapk9	-0.375571	7.18929e-05	0.00101349	DOWN
Ccdc115	0.427815	7.22353e-05	0.00101739	UP
Cpne7	4.42049	7.29456e-05	0.00102576	UP
Ube2r2	-0.399102	7.29619e-05	0.00102576	DOWN
Zfp108	-1.00783	7.3188e-05	0.00102801	DOWN
Cars	0.577157	7.36765e-05	0.00103394	UP
Mat2b	-0.465329	7.38149e-05	0.00103494	DOWN
Srarp	1.82381	7.40908e-05	0.00103787	UP
Zswim8	0.636767	7.4354e-05	0.00104062	UP
Trappc2	-0.583708	7.46284e-05	0.00104352	DOWN
Gadd45g	2.06789	7.48184e-05	0.00104523	UP
Nub1	-0.410402	7.48933e-05	0.00104534	DOWN
Pigp	-0.666832	7.51913e-05	0.00104856	DOWN
Lss	3.13023	7.55426e-05	0.00105251	UP
Golga4	-0.54567	7.58917e-05	0.00105643	DOWN
Il2ra	-1.7925	7.61614e-05	0.00105923	DOWN
Oaz2	-0.394245	7.65736e-05	0.00106401	DOWN
Adam12	2.16449	7.75246e-05	0.00107626	UP
Slc2a12	-1.19953	7.78793e-05	0.00108022	DOWN
Ift88	-0.871715	7.81044e-05	0.00108237	DOWN
Seh1l	0.395774	7.84101e-05	0.00108564	UP
Grb2	-0.299313	7.87235e-05	0.00108885	DOWN
Hlf	-1.4107	7.87825e-05	0.00108885	DOWN
Ctgf	1.71629	7.92051e-05	0.00109372	UP
Ywhaz	0.574443	7.95408e-05	0.00109738	UP
Fam213a	-1.02453	7.99575e-05	0.00110158	DOWN
Ctu2	0.728975	7.99873e-05	0.00110158	UP
Mrps31	-0.568584	8.01487e-05	0.00110283	DOWN
Itga2b	3.96549	8.07218e-05	0.00110973	UP
Mzt1	-0.646681	8.0843e-05	0.00111041	DOWN
Nudt15	-0.614604	8.09942e-05	0.0011115	DOWN
Mov10l1	-0.800281	8.12576e-05	0.00111413	DOWN
Gak	0.497262	8.16423e-05	0.00111842	UP
B430306N03Rik	3.06044	8.18208e-05	0.00111914	UP
Trmt5	-0.657607	8.18389e-05	0.00111914	DOWN
4921536K21Rik	-1.91996	8.20707e-05	0.00112132	DOWN
Echdc3	-0.844514	8.30941e-05	0.0011343	DOWN
Dhrs11	-0.489264	8.32324e-05	0.00113519	DOWN
Nipa1	-0.744369	8.33713e-05	0.00113609	DOWN
Ubxn4	0.495256	8.42582e-05	0.00114717	UP
Tmem38a	-0.497791	8.46592e-05	0.00115162	DOWN
Mug1	5.08668	8.47636e-05	0.00115203	UP
Agl	-0.641157	8.52831e-05	0.00115807	DOWN
Myo1c	0.888111	8.58447e-05	0.00116449	UP
Cnn2	1.02537	8.59054e-05	0.00116449	UP
Dpp8	-0.355733	8.61691e-05	0.00116704	DOWN
Aprt	0.908571	8.62503e-05	0.00116712	UP
Optn	-0.625154	8.63827e-05	0.0011679	DOWN
Ecscr	1.19964	8.65528e-05	0.00116918	UP
St6galnac6	-0.667125	8.71221e-05	0.00117585	DOWN
Hsp90aa1	1.00373	8.80007e-05	0.00118667	UP
Nr2c2ap	1.0342	8.8383e-05	0.00119079	UP
Sf1	0.542895	8.86205e-05	0.00119296	UP
Cyfip2	-0.977282	8.93488e-05	0.00120172	DOWN
Zfp954	0.601387	8.94354e-05	0.00120184	UP
March3	1.06855	8.96063e-05	0.0012031	UP
Smc3	-0.355998	9.05846e-05	0.00121441	DOWN
Dync1li1	0.345975	9.06057e-05	0.00121441	UP
Adamts9	1.47124	9.09281e-05	0.00121768	UP
2700097O09Rik	-0.870557	9.16225e-05	0.00122592	DOWN
Tax1bp3	0.593113	9.27426e-05	0.00123984	UP
Mrpl42	-0.521334	9.37071e-05	0.00125166	DOWN
Ifi209	1.62041	9.45397e-05	0.00126169	UP
Rnf19a	0.567378	9.63653e-05	0.00128424	UP
Ddx18	0.452593	9.63945e-05	0.00128424	UP
Ap5b1	0.974854	9.66133e-05	0.00128605	UP
1700123O20Rik	0.459969	9.76024e-05	0.0012981	UP
Spcs3	0.943662	9.79356e-05	0.00130142	UP
Osbpl8	-0.575631	9.83622e-05	0.00130597	DOWN
Wdr41	-0.393983	9.96675e-05	0.00132217	DOWN
Crk	0.410168	0.000100386	0.00132996	UP
Sdc4	1.26562	0.000100426	0.00132996	UP
Neo1	-0.474839	0.00010082	0.00133404	DOWN
Herpud1	-1.06339	0.000101097	0.00133656	DOWN
Tgm2	1.01745	0.000101203	0.00133682	UP
Htt	0.560526	0.000101722	0.00134254	UP
Fbxo9	0.452751	0.000102154	0.00134605	UP
Cog8	-0.390452	0.000102161	0.00134605	DOWN
Sfxn5	0.996698	0.000103101	0.00135728	UP
Gna13	0.518132	0.000103438	0.00136057	UP
Fbxo40	-0.534697	0.000103948	0.00136611	DOWN
Drosha	-0.455128	0.00010422	0.00136853	DOWN
Gpr180	-0.446492	0.000104458	0.0013697	DOWN
Crlf2	1.24697	0.000104559	0.0013697	UP
Usp13	-0.351655	0.000104574	0.0013697	DOWN
Rnh1	0.569907	0.000105712	0.00138344	UP
Anxa2	1.42108	0.000106308	0.00139006	UP
Mettl6	0.565989	0.000106415	0.00139029	UP
Isca1	-0.544999	0.000106928	0.00139581	DOWN
Pdk2	-0.752751	0.000107168	0.00139777	DOWN
Nbr1	-0.524468	0.000107554	0.00140163	DOWN
Acod1	4.86072	0.00010799	0.00140546	UP
Simc1	0.794004	0.000108029	0.00140546	UP
Oas1a	1.26527	0.00010844	0.00140963	UP
Ripk3	1.78777	0.000108585	0.00141033	UP
Efr3a	-0.427478	0.000108762	0.00141145	DOWN
Auh	-0.683254	0.000110311	0.00142841	DOWN
Tmem175	-0.464533	0.00011037	0.00142841	DOWN
Appl2	-0.695872	0.000110386	0.00142841	DOWN
Serpina3k	3.2452	0.000110461	0.00142841	UP
Tatdn2	0.590093	0.000110529	0.00142841	UP
Ttc30b	-0.704851	0.000110904	0.00143206	DOWN
Fggy	-0.733157	0.000111422	0.00143637	DOWN
Edc4	0.376278	0.000111422	0.00143637	UP
Sacs	1.07813	0.000112427	0.00144736	UP
H13	0.557641	0.000112462	0.00144736	UP
Hcls1	0.968136	0.000112599	0.00144793	UP
Gng12	0.479425	0.000113421	0.00145598	UP
Vav1	1.48615	0.00011344	0.00145598	UP
Fkbp10	0.966851	0.000113507	0.00145598	UP
Wnt5a	-0.81159	0.000114122	0.00146267	DOWN
Eif5a	0.437746	0.000116317	0.00148957	UP
Hcfc1	0.4317	0.000116711	0.00149338	UP
Mrps35	-0.510915	0.000119754	0.00153105	DOWN
Ptcd2	-0.548342	0.000120372	0.00153769	DOWN
Ppip5k2	-0.921854	0.000120513	0.00153823	DOWN
Ywhah	0.378526	0.00012118	0.00154547	UP
Nob1	0.639821	0.000121554	0.00154897	UP
Ttll11	2.10112	0.000121717	0.00154977	UP
Grb14	-1.06672	0.000124677	0.00158615	DOWN
Steap2	1.26679	0.000125011	0.0015891	UP
Sema6c	-1.74195	0.000126355	0.00160487	DOWN
Afg1l	-0.644856	0.000127107	0.00161311	DOWN
Cox19	0.651533	0.000127315	0.00161443	UP
Ppcdc	-1.00719	0.000127477	0.00161515	DOWN
Nsf	0.484447	0.000127599	0.00161538	UP
Pigu	-0.355725	0.000128206	0.00162174	DOWN
Dhx36	-0.350011	0.000130195	0.00164556	DOWN
Pcsk6	-1.12424	0.000130754	0.00165128	DOWN
Pdlim5	0.481759	0.000131262	0.00165636	UP
Mkks	-0.657695	0.000131388	0.0016566	DOWN
Eif3b	0.351093	0.000131953	0.00166103	UP
Slc39a1	0.435398	0.000131954	0.00166103	UP
Ids	-0.423008	0.000132199	0.00166152	DOWN
Gan	0.743798	0.000132206	0.00166152	UP
Dynlt3	-0.379266	0.000132597	0.00166507	DOWN
Clip2	1.1513	0.000133743	0.00167723	UP
Chrnb1	1.04044	0.000133781	0.00167723	UP
Fgl2	1.02963	0.000134466	0.00168446	UP
Iffo2	0.848996	0.000134815	0.00168747	UP
Taf4	-0.4719	0.000135824	0.0016981	DOWN
Hscb	-1.00457	0.000135883	0.0016981	DOWN
Gmnn	-0.767437	0.000136561	0.0017052	DOWN
3425401B19Rik	-0.616517	0.000136682	0.00170534	DOWN
Pcyt2	-0.620669	0.000137513	0.00171433	DOWN
Hist2h2be	-1.07266	0.000138001	0.0017184	DOWN
Stat3	0.630226	0.000138061	0.0017184	UP
Mdn1	1.05123	0.000138322	0.00172027	UP
Snrpa1	0.813529	0.000141117	0.00175349	UP
Stom	-0.793489	0.000141219	0.00175349	DOWN
Prkra	-0.664443	0.000142525	0.00176744	DOWN
Pbld2	-1.03247	0.00014257	0.00176744	DOWN
Larp1	0.50019	0.000142872	0.00176977	UP
Rsbn1l	-0.441389	0.000143555	0.00177681	DOWN
Glt8d2	-1.71683	0.000143955	0.00178034	DOWN
Extl2	-0.467414	0.000144466	0.00178524	DOWN
Phactr4	0.47358	0.000145141	0.00179215	UP
Asah2	-0.638717	0.000146167	0.00180338	DOWN
Ppp3ca	-0.387151	0.000146461	0.00180422	DOWN
Abca8b	-1.09872	0.000146592	0.00180422	DOWN
Actr2	0.331001	0.000146679	0.00180422	UP
Dgke	-0.688671	0.000146699	0.00180422	DOWN
Setd5	0.451224	0.000147853	0.00181697	UP
Pde1b	1.52556	0.000148129	0.00181892	UP
Arg2	4.54182	0.000148334	0.00181999	UP
Fxr1	-0.395821	0.000148739	0.00182193	DOWN
Nsmce2	-0.461214	0.000148796	0.00182193	DOWN
Nol6	0.566763	0.000148873	0.00182193	UP
Tmod4	-0.696075	0.000148961	0.00182193	DOWN
Terf2ip	-0.353173	0.00015028	0.0018362	DOWN
Upp1	2.13491	0.000150365	0.0018362	UP
Sh3bp2	1.10563	0.000151757	0.00185174	UP
Psme3	0.271813	0.000151924	0.00185233	UP
Myc	2.05756	0.000152563	0.00185866	UP
Lix1	-1.74818	0.000153172	0.00186321	DOWN
Clec5a	2.57318	0.000153177	0.00186321	UP
Ppp1r9a	-0.742661	0.00015331	0.00186337	DOWN
C5ar2	1.235	0.000153826	0.00186818	UP
Zfp975	-0.729363	0.000154186	0.00187109	DOWN
Rtraf	-0.367848	0.000154313	0.00187117	DOWN
Fam220a	-0.578743	0.000155209	0.00188056	DOWN
Klhl9	-0.348504	0.000155411	0.00188154	DOWN
Wdr77	0.466392	0.000155678	0.00188331	UP
Rab3a	-0.96612	0.000155997	0.00188569	DOWN
Aagab	-0.514521	0.000156229	0.00188702	DOWN
Rab2a	-0.31872	0.000157791	0.00190442	DOWN
Dguok	-0.637224	0.000158018	0.00190567	DOWN
Slc3a2	0.873817	0.000158526	0.00191031	UP
Tarm1	2.80463	0.000159299	0.00191814	UP
Ift52	-0.407627	0.000159588	0.00192013	DOWN
Rassf3	-0.591456	0.000160023	0.00192387	DOWN
Asb15	-1.43692	0.000160486	0.00192794	DOWN
Itm2a	-0.811347	0.000160697	0.00192826	DOWN
Abhd14b	-0.762364	0.000160761	0.00192826	DOWN
Fgr	2.38012	0.000161997	0.00194158	UP
L2hgdh	-0.599357	0.000162308	0.00194381	DOWN
Sdr39u1	-0.583879	0.000163004	0.00195064	DOWN
Gm20390	1.6851	0.000164653	0.00196886	UP
Rpl10	0.817558	0.000165152	0.0019733	UP
Ccm2	0.487368	0.000167427	0.00199748	UP
Aqp11	-1.42986	0.000167433	0.00199748	DOWN
Surf4	0.454695	0.000167936	0.00200195	UP
Ppm1l	-0.755537	0.000168793	0.00201061	DOWN
Fam214b	0.606713	0.000168978	0.00201127	UP
Zfp273	-1.2187	0.00016952	0.00201619	DOWN
Rmdn2	-0.617735	0.000169869	0.00201879	DOWN
Ccl17	2.62328	0.000171289	0.00203411	UP
Msr1	1.62675	0.000174678	0.00207276	UP
Aldh1a2	1.49783	0.000176073	0.00208772	UP
CN725425	-1.67144	0.000176859	0.00209544	DOWN
Gpr155	-1.40872	0.00017707	0.00209634	DOWN
Nfs1	-0.391742	0.000179178	0.00211968	DOWN
Cxcr4	1.55583	0.000179323	0.00211978	UP
Erap1	-0.495379	0.000179878	0.00212415	DOWN
Pygo1	-0.900854	0.000179967	0.00212415	DOWN
Sdhaf2	-0.369141	0.000180152	0.0021245	DOWN
Cyp26b1	-1.95409	0.000180269	0.0021245	DOWN
Kmt2b	0.472134	0.000180478	0.00212533	UP
Rabgef1	0.581866	0.000180614	0.00212533	UP
Runx1t1	-1.09724	0.000182545	0.00214642	DOWN
Cox17	-0.513613	0.00018327	0.00215332	DOWN
Rassf5	1.26341	0.000184222	0.00216286	UP
Has2	2.0709	0.000184908	0.00216928	UP
Rbm34	0.621599	0.000185297	0.00217221	UP
Cep19	-0.887278	0.000185455	0.00217241	DOWN
Bco1	3.84162	0.000186116	0.00217851	UP
Alox5ap	1.32854	0.000186934	0.00218644	UP
Lox	1.79641	0.000187266	0.00218867	UP
Gmps	-0.390673	0.000188602	0.00220262	DOWN
Gramd1c	-1.4796	0.000189367	0.0022099	DOWN
Atp8b1	0.97209	0.000189688	0.00221198	UP
Actr1b	0.314932	0.000195096	0.00227334	UP
Xrcc4	-0.561473	0.00019539	0.00227506	DOWN
Ankrd13a	0.616605	0.000195549	0.0022752	UP
Mttp	-0.795865	0.000195877	0.00227731	DOWN
Lrrc8d	0.84795	0.000196179	0.00227911	UP
Nudt2	-0.52933	0.000196458	0.00228064	DOWN
Lancl1	-0.420826	0.000198345	0.00230083	DOWN
Fam104a	0.462987	0.000199371	0.00231101	UP
Rnf115	0.798383	0.000199643	0.00231243	UP
Psat1	1.83965	0.000200425	0.00231976	UP
Tmbim1	0.85599	0.000201062	0.0023254	UP
Sprr1a	3.30446	0.000201668	0.00233067	UP
Sesn2	1.06129	0.000202495	0.00233768	UP
Ecm2	-1.161	0.000202576	0.00233768	DOWN
Dzip1	-1.46448	0.000202742	0.00233786	DOWN
Rgs16	2.51817	0.000202922	0.0023382	UP
Itm2b	-0.841464	0.000203187	0.00233952	DOWN
Adi1	-0.913928	0.000203616	0.0023424	DOWN
Map3k5	-0.798825	0.000203739	0.0023424	DOWN
Srsf1	0.455894	0.00020433	0.00234745	UP
Ccdc66	-0.621877	0.000205854	0.00236293	DOWN
Urah	-1.24539	0.000205982	0.00236293	DOWN
Ltv1	0.53653	0.000206903	0.00237174	UP
Slc20a1	1.29292	0.000207582	0.00237777	UP
Wdr5	0.277677	0.000208659	0.00238835	UP
Adpgk	0.841578	0.000209333	0.00239429	UP
Mfap1b	-0.366057	0.000210004	0.0024002	DOWN
Cdkn1b	-0.609735	0.000210609	0.00240534	DOWN
Aars	0.519424	0.000212045	0.00241997	UP
Cdr2	1.49103	0.000212401	0.00242224	UP
Art5	-0.958987	0.000212946	0.00242668	DOWN
St3gal1	0.654715	0.000213664	0.00243307	UP
Ddx23	0.355652	0.000214183	0.0024372	UP
Cks2	1.36126	0.000215099	0.00244582	UP
Kif28	-1.92299	0.00021543	0.0024478	DOWN
Poll	-0.602239	0.000216837	0.00246198	DOWN
Gp1ba	-0.952213	0.000217968	0.00247301	DOWN
Smox	1.06759	0.00021823	0.00247418	UP
Tnfrsf10b	1.19604	0.000218631	0.00247691	UP
Nup160	0.470309	0.000219481	0.00248473	UP
Tbc1d7	-0.469211	0.000220695	0.00249665	DOWN
Stc1	1.51794	0.000221023	0.00249854	UP
Yipf4	-0.523032	0.000221813	0.00250564	DOWN
Olfr1034	-1.42096	0.000222039	0.00250638	DOWN
Llph	0.650636	0.000222292	0.00250741	UP
Pvr	1.10325	0.000222877	0.00251218	UP
Gnai3	0.547923	0.000223134	0.00251325	UP
Cpsf2	0.301498	0.000224194	0.00252336	UP
Pak2	0.375869	0.000225156	0.00253087	UP
Map1b	1.74977	0.000225187	0.00253087	UP
Ltb	2.91298	0.000227092	0.00255042	UP
Fam13b	0.863197	0.000228176	0.00255973	UP
Ralgapa1	-0.452687	0.00022825	0.00255973	DOWN
3110001I22Rik	-6.52387	0.000230895	0.00258752	DOWN
Fam114a2	-0.314798	0.000231483	0.00259225	DOWN
Lrrc41	0.441294	0.000231994	0.00259481	UP
Syngr2	-0.380386	0.000232047	0.00259481	DOWN
Cass4	2.63027	0.000232931	0.00260282	UP
Stau2	-0.637978	0.000233766	0.00261027	DOWN
Rab22a	-0.313592	0.000233936	0.0026103	DOWN
Eef1e1	0.744957	0.000234515	0.00261488	UP
Smim19	-0.725552	0.000237492	0.00264617	DOWN
Pink1	-0.363549	0.000238377	0.00265413	DOWN
Wdsub1	-0.65844	0.000239105	0.00265954	DOWN
Them4	-0.52964	0.000239206	0.00265954	DOWN
Ncoa2	-0.39671	0.000239513	0.00266054	DOWN
Mterf4	-0.65385	0.000239639	0.00266054	DOWN
Amacr	-0.727439	0.000240888	0.0026725	DOWN
Chchd3	-0.650962	0.000243749	0.00270231	DOWN
Nme4	-0.93018	0.000244254	0.0027037	DOWN
Icam1	0.971713	0.000244265	0.0027037	UP
Kcnj2	-0.899765	0.000244397	0.0027037	DOWN
Prmt7	0.428084	0.000247067	0.00273128	UP
Sms	-0.66786	0.000248089	0.00274063	DOWN
Usp10	0.535753	0.00024848	0.002743	UP
Cdc42ep4	0.708786	0.000248732	0.00274383	UP
Arfgap3	0.850695	0.000249395	0.00274725	UP
Rbm3	0.960018	0.00024947	0.00274725	UP
Yae1d1	-0.411454	0.000249615	0.00274725	DOWN
Col12a1	1.76319	0.00024975	0.00274725	UP
Ccl4	3.10018	0.000250772	0.00275508	UP
Gpd1l	-0.540777	0.000250817	0.00275508	DOWN
Nmt2	0.664216	0.000252609	0.0027728	UP
Faf1	-0.40961	0.000253766	0.00278354	DOWN
Zfp965	-0.706819	0.000254725	0.00279208	DOWN
Cecr2	-0.67078	0.000255104	0.00279426	DOWN
Akirin1	0.424285	0.000255802	0.00279994	UP
Gpr157	-0.861831	0.000257375	0.00281516	DOWN
Fpgs	1.14622	0.000258501	0.00282549	UP
Gm17374	-4.15702	0.000259479	0.00283418	DOWN
Farp1	0.929942	0.000259732	0.00283495	UP
Uqcrb	-0.569111	0.000260765	0.00284422	DOWN
Rps12-ps3	0.610475	0.000261841	0.00285395	UP
Hdac8	-0.70695	0.000262562	0.00285893	DOWN
Mkln1	-0.335229	0.000262666	0.00285893	DOWN
AI597479	-0.398609	0.000263008	0.00286065	DOWN
Bcl10	0.369512	0.000263848	0.00286778	UP
Mcmbp	0.341254	0.000264033	0.00286778	UP
Ephx1	-0.88965	0.00026673	0.00289504	DOWN
Exd2	-0.587834	0.00026703	0.00289628	DOWN
Mphosph10	0.53673	0.000267928	0.00290399	UP
Stxbp4	-0.888671	0.000269877	0.00292307	DOWN
Fam168b	0.307527	0.000270869	0.00293177	UP
Mettl15	-0.851784	0.000272928	0.002952	DOWN
Fmnl1	1.0528	0.000275122	0.00297365	UP
Glo1	-0.506488	0.000276053	0.00298153	DOWN
Bmp2k	0.644416	0.000276234	0.00298153	UP
Ints5	0.517861	0.000276911	0.00298486	UP
Zc3h7a	0.533115	0.000276927	0.00298486	UP
Urb1	0.675738	0.000277274	0.00298597	UP
Rap1b	0.554371	0.000277415	0.00298597	UP
Grk6	0.418616	0.000277999	0.00299018	UP
Ifit1bl2	-0.936481	0.000278469	0.00299211	DOWN
Zfp992	-0.873312	0.000278565	0.00299211	DOWN
Gprc5b	1.07396	0.000279199	0.00299685	UP
Zmat3	0.570457	0.000280915	0.00301319	UP
Hck	1.55092	0.000283198	0.00303558	UP
Iars	0.40319	0.000283869	0.00303949	UP
Nsmaf	-0.442461	0.000283955	0.00303949	DOWN
Chd7	0.809648	0.00028589	0.0030581	UP
Ino80	0.530396	0.000286141	0.00305867	UP
Ezh1	-0.522737	0.000292463	0.00312101	DOWN
Ahsa2	-0.411372	0.000292476	0.00312101	DOWN
Calm2	0.450678	0.000292576	0.00312101	UP
Mmp19	1.34372	0.000294281	0.00313705	UP
Sobp	-0.65346	0.000295334	0.00314611	DOWN
Nek1	-0.663351	0.000296681	0.00315829	DOWN
Hipk4	-1.53821	0.000298272	0.00317305	DOWN
Mtfp1	-0.728724	0.000298722	0.00317566	DOWN
Ahctf1	0.464674	0.000299727	0.00318417	UP
Tmem70	-0.456435	0.000300017	0.00318506	DOWN
Lamtor2	-0.470842	0.000300941	0.00319206	DOWN
Nfil3	1.3354	0.000301087	0.00319206	UP
Ldlr	1.40845	0.000301897	0.00319846	UP
Ano10	-0.596815	0.000303947	0.00321637	DOWN
Tpk1	-1.65908	0.000304002	0.00321637	DOWN
Lrrfip1	0.765869	0.000306985	0.0032453	UP
Rdh12	4.05874	0.000307154	0.0032453	UP
Lgals7	-3.58435	0.000308052	0.00325086	DOWN
Armh3	-0.429579	0.0003081	0.00325086	DOWN
Tor1aip1	-0.38924	0.00030839	0.00325171	DOWN
Qpctl	0.605352	0.0003091	0.00325699	UP
Cap2	-0.29597	0.000310588	0.00327044	DOWN
Zfp64	0.603053	0.00031124	0.00327313	UP
Cav3	0.826866	0.000311264	0.00327313	UP
Itih5	-1.27161	0.000312307	0.00328143	DOWN
Tns3	0.836721	0.000312477	0.00328143	UP
Col14a1	-1.43104	0.000315199	0.00330591	DOWN
Sirpb1b	2.5482	0.000315292	0.00330591	UP
Uty	-0.726957	0.000315447	0.00330591	DOWN
Wtip	0.764733	0.000316046	0.00330995	UP
Slc35e1	-0.411561	0.00031696	0.00331729	DOWN
Igsf6	1.38471	0.000317344	0.00331907	UP
Pknox1	0.788324	0.000320588	0.00335073	UP
Prmt5	0.385785	0.000321016	0.00335295	UP
Cnot4	-0.422945	0.000321859	0.0033595	DOWN
Thap4	-0.656042	0.000322231	0.00336112	DOWN
Phkg1	-1.1202	0.000323288	0.00336924	DOWN
Mrpl28	-0.436129	0.000323443	0.00336924	DOWN
Tmem42	-0.74706	0.000323878	0.0033715	DOWN
Plec	0.675884	0.000325716	0.00338837	UP
Ccnyl1	0.49612	0.000327111	0.0034006	UP
Loxl4	1.91142	0.000327911	0.00340663	UP
Decr2	-0.654345	0.000329076	0.00341453	DOWN
Mest	2.22463	0.000329111	0.00341453	UP
Ccl2	2.73406	0.000331149	0.00343338	UP
Clic4	0.901692	0.000331843	0.00343827	UP
Lcp2	1.33707	0.000332915	0.0034449	UP
Mindy2	-0.488503	0.000332933	0.0034449	DOWN
Rapsn	-0.8544	0.000333148	0.0034449	DOWN
Shisal1	2.03889	0.000333976	0.00345116	UP
Hspa12a	-1.21518	0.000334924	0.00345866	DOWN
Actl6a	0.404545	0.000337488	0.00348281	UP
Tgfb1i1	1.22798	0.000338749	0.00349351	UP
Tubd1	-0.698672	0.000340204	0.00350466	DOWN
Abca6	-1.07836	0.000340313	0.00350466	DOWN
Zc3h8	-0.580729	0.000340549	0.00350466	DOWN
Akr1b3	-0.525466	0.000340734	0.00350466	DOWN
Syt3	-1.98428	0.000341283	0.00350798	DOWN
Ruvbl2	0.578844	0.000341516	0.00350806	UP
Cetn2	-0.610993	0.000341745	0.00350808	DOWN
Pgd	0.759789	0.000342993	0.00351857	UP
Gar1	0.692366	0.000343707	0.00352251	UP
Inmt	-1.81701	0.000343831	0.00352251	DOWN
Etv6	0.880332	0.000345492	0.00353719	UP
Cmc2	-0.61826	0.0003464	0.00354414	DOWN
Thnsl1	-0.707569	0.000346819	0.0035461	DOWN
Dap3	-0.421422	0.000348499	0.00356093	DOWN
Il10rb	-0.793108	0.000352245	0.00359684	DOWN
Psmd3	0.392001	0.000352749	0.00359938	UP
Gm34302	-0.658682	0.000352957	0.00359938	DOWN
Tsku	1.61219	0.000353399	0.00360151	UP
Fa2h	-14.1266	0.000353852	0.00360377	DOWN
Chmp4b	0.347174	0.00035432	0.00360616	UP
Ugdh	0.861041	0.000355086	0.0036116	UP
Isoc1	-0.602691	0.000355596	0.00361441	DOWN
Mamdc2	-1.27755	0.000357382	0.00362518	DOWN
Bin2	1.68919	0.000357434	0.00362518	UP
Mrpl46	-0.454421	0.000357586	0.00362518	DOWN
Tmem218	-0.85224	0.00035759	0.00362518	DOWN
Bst1	1.87976	0.000358389	0.00363091	UP
Neurl3	1.19805	0.00035907	0.00363544	UP
Map3k3	0.462569	0.000359483	0.00363725	UP
Sf3b3	0.465263	0.000361379	0.00365405	UP
St6galnac4	0.993755	0.000361887	0.00365681	UP
Kcnip2	-1.32798	0.000362933	0.00366499	DOWN
Sord	-0.632821	0.000363839	0.00367175	DOWN
Polr3gl	-0.739891	0.000367084	0.00370209	DOWN
Rpl18	0.491235	0.000368148	0.00371041	UP
Nkap	-0.386848	0.000368915	0.00371572	DOWN
Ctsf	-0.62019	0.00037027	0.00372538	DOWN
S100a7a	3.99279	0.000370354	0.00372538	UP
Itgax	1.89809	0.000371563	0.0037332	UP
Mfap5	1.30817	0.000371613	0.0037332	UP
Vps13c	-0.754657	0.000373618	0.00375093	DOWN
Fmnl2	0.924039	0.000374176	0.00375409	UP
Ptgfr	-1.41826	0.000376812	0.0037781	DOWN
Fkbp15	0.900495	0.00037709	0.00377844	UP
Fnip1	-0.531516	0.000378809	0.00379166	DOWN
Ube2n	-0.554379	0.000378898	0.00379166	DOWN
Tgfb3	0.77512	0.000380467	0.00380491	UP
Hdac11	-1.50063	0.000382738	0.00382516	DOWN
Resf1	0.820206	0.00038338	0.00382912	UP
Fermt2	0.760364	0.000383722	0.00383006	UP
Acp6	-0.55146	0.000384503	0.00383539	DOWN
Gm6377	1.81451	0.000385038	0.00383826	UP
Fam49b	0.593024	0.000392793	0.00391306	UP
Cdc42bpb	0.716304	0.000393552	0.00391722	UP
Hars2	-0.373145	0.000393716	0.00391722	DOWN
Kcnc1	-3.13088	0.000395845	0.00393588	DOWN
Gtf3c4	0.344795	0.000400467	0.00397699	UP
Srpk3	-0.605542	0.000400492	0.00397699	DOWN
Ly6c2	2.94185	0.000403807	0.00400483	UP
Grk1	-0.893315	0.000403812	0.00400483	DOWN
Ethe1	-0.574349	0.000406354	0.00402747	DOWN
Rps28	0.604877	0.000407506	0.00403631	UP
Ell	0.702687	0.000409181	0.00405032	UP
Kdelr2	0.595273	0.000409859	0.00405444	UP
Pilrb1	2.33189	0.000411695	0.00407001	UP
Aasdh	-0.829423	0.000412516	0.00407553	DOWN
Ago4	-0.561895	0.000413334	0.00408102	DOWN
St3gal3	-0.458153	0.000414062	0.00408561	DOWN
Tnni3k	-0.498915	0.00041582	0.00410035	DOWN
Rere	-0.411521	0.000419885	0.0041378	DOWN
Eif4enif1	0.318782	0.000421221	0.00414833	UP
Myl12a	0.620255	0.000422601	0.00415928	UP
Gprc5a	1.89163	0.000426781	0.00419776	UP
Tceal7	-2.63252	0.000432096	0.00424734	DOWN
Orm1	3.57721	0.000434786	0.00427109	UP
Irf8	0.846401	0.000436893	0.00428852	UP
Ikzf1	1.17373	0.000437113	0.00428852	UP
Ncf4	1.72616	0.000437788	0.00429242	UP
Aldh18a1	0.949237	0.00043848	0.00429649	UP
Cmc1	-0.632417	0.000439748	0.00430375	DOWN
Arsb	-0.706962	0.000439806	0.00430375	DOWN
Tars	0.506923	0.000440053	0.00430375	UP
Cyp2s1	-2.75191	0.000440507	0.00430548	DOWN
Yipf5	0.471706	0.000440845	0.00430607	UP
Stip1	0.427686	0.000441479	0.00430936	UP
Calm3	0.367451	0.000441736	0.00430936	UP
Sfn	1.78512	0.000443319	0.00432209	UP
Cth	-1.37809	0.000446716	0.00435246	DOWN
Ppp1r12b	-0.434888	0.000447896	0.00436123	DOWN
Ap2b1	0.519213	0.000449691	0.00437413	UP
Arfrp1	-0.598837	0.000449785	0.00437413	DOWN
Tspan4	0.863969	0.000452474	0.00439753	UP
Plscr1	1.28162	0.000454054	0.0044075	UP
Ndufaf5	-0.439556	0.000454068	0.0044075	DOWN
Ppp2r5c	-0.373666	0.000455778	0.00441895	DOWN
Gtpbp4	0.510532	0.000455817	0.00441895	UP
Arl3	-0.437936	0.000456615	0.00442392	DOWN
Copb1	0.477312	0.000457619	0.00443089	UP
Zfp14	-0.873076	0.000459958	0.00445076	DOWN
Oxct1	-0.631945	0.000465847	0.00450493	DOWN
Sh3bp5l	0.54723	0.000466917	0.00451247	UP
Gpr55	4.35613	0.000467225	0.00451263	UP
Arrb2	0.841939	0.000468463	0.00452177	UP
Mrln	-1.78642	0.00047054	0.004539	DOWN
Psmc4	0.391574	0.000473114	0.00456099	UP
Ktn1	-0.544537	0.000477167	0.00459721	DOWN
Sele	2.45317	0.000477917	0.00460159	UP
Pcbp4	0.616668	0.000479247	0.00461132	UP
Spc24	-1.28445	0.000479523	0.00461132	DOWN
Ifrd1	1.24582	0.000480315	0.00461608	UP
Sirt3	-0.549692	0.000483655	0.00464531	DOWN
Tyrobp	1.12895	0.000484545	0.00465097	UP
Fam174a	-0.362473	0.000487417	0.00467299	DOWN
Dirc2	-0.591332	0.000487441	0.00467299	DOWN
Atp1b2	-0.855468	0.000489875	0.00469343	DOWN
Zfp60	-0.559476	0.000490598	0.00469746	DOWN
Arfip1	0.446859	0.000492985	0.00471565	UP
Gsg1l	-0.939337	0.000493183	0.00471565	DOWN
Lmnb1	0.782614	0.000493409	0.00471565	UP
Prkab2	0.718691	0.000494228	0.00472056	UP
Tor2a	0.759595	0.00049683	0.0047425	UP
Ric8b	-0.651898	0.000497375	0.00474322	DOWN
Rhod	0.783563	0.000497517	0.00474322	UP
Zfp354c	-0.821095	0.000498414	0.00474886	DOWN
Col4a1	1.28009	0.000498857	0.00475016	UP
Slc25a26	-0.771078	0.000499256	0.00475105	DOWN
Armt1	-0.401617	0.000502783	0.00477913	DOWN
Tnfaip8l1	1.11954	0.000503016	0.00477913	UP
Ndel1	0.469003	0.000503211	0.00477913	UP
Spata13	0.909975	0.000503439	0.00477913	UP
Dnttip2	0.471224	0.000505075	0.00478966	UP
Pxn	0.622199	0.000505166	0.00478966	UP
Cd84	1.11163	0.000506264	0.00479714	UP
Serpinb9	-0.60295	0.000506591	0.00479732	DOWN
Gclc	0.630652	0.000507225	0.00480039	UP
Cyp27a1	-1.01571	0.000508577	0.00480839	DOWN
Rps2	0.351734	0.00050869	0.00480839	UP
Dhdh	-0.889898	0.000509037	0.00480875	DOWN
Dut	-0.742767	0.000513646	0.00484933	DOWN
Alb	2.71088	0.000518096	0.00488686	UP
Brd2	0.408367	0.00051825	0.00488686	UP
Knop1	0.372079	0.000518849	0.00488953	UP
Ppm1g	0.413718	0.000520461	0.00490017	UP
Tnfaip6	1.54908	0.000520609	0.00490017	UP
Ep400	0.433404	0.000522473	0.00491472	UP
Cpq	-0.528883	0.000524371	0.00492959	DOWN
Rara	1.04196	0.000528644	0.00496676	UP
G6pdx	0.880303	0.000529023	0.00496731	UP
Lrrc15	-1.55146	0.000529546	0.00496922	DOWN
Rmnd5a	-0.563817	0.000535261	0.00501981	DOWN
Btaf1	0.512595	0.000535998	0.00502369	UP
Ccdc47	-0.340477	0.000539687	0.00505521	DOWN
Swi5	-0.371379	0.000541862	0.00507252	DOWN
Pusl1	0.838008	0.000542534	0.00507575	UP
Il7r	2.40494	0.000544284	0.00508905	UP
Dnajc9	-0.614175	0.000544998	0.00509266	DOWN
Aen	0.445342	0.000545785	0.00509411	UP
Cenpp	-1.07548	0.00054581	0.00509411	DOWN
Nfe2	2.55307	0.000546732	0.00509966	UP
Slc46a3	-1.00379	0.000548592	0.00511393	DOWN
Pop1	0.914314	0.000555054	0.00517106	UP
Tdg	0.575502	0.000555872	0.00517423	UP
Vps41	-0.411495	0.00055606	0.00517423	DOWN
Qser1	-0.41489	0.00055748	0.00518433	DOWN
Rbpj	0.379752	0.000561073	0.00521462	UP
Rpl32	0.435322	0.000562462	0.0052244	UP
Mrps14	-0.512857	0.000564114	0.00523661	DOWN
Nol12	0.752887	0.000565866	0.00524974	UP
Aktip	-0.599611	0.000566864	0.0052533	DOWN
Tmem50b	-0.572546	0.000566927	0.0052533	DOWN
Brms1l	-0.526176	0.000569731	0.00527302	DOWN
Exoc5	0.354824	0.000569735	0.00527302	UP
Creg1	-0.634291	0.000571873	0.00528965	DOWN
Ptpn21	0.631537	0.000572758	0.00529468	UP
Zbtb26	-1.0785	0.000574053	0.00530049	DOWN
Ttll1	-2.10665	0.000574069	0.00530049	DOWN
Cabcoco1	-1.19908	0.000574548	0.00530176	DOWN
Tnfrsf23	1.92056	0.000576052	0.00531248	UP
Furin	0.406522	0.000578379	0.00533078	UP
Cgn	-2.53015	0.000580073	0.00534322	DOWN
Rrbp1	0.512762	0.000581045	0.00534899	UP
Fuz	-0.823009	0.000582849	0.00536242	DOWN
Kif3b	0.445573	0.000584648	0.00537555	UP
Heatr3	0.378951	0.000584969	0.00537555	UP
Hpgd	-1.39789	0.000585345	0.00537583	DOWN
Nlrp10	-0.418108	0.000586033	0.00537896	DOWN
Nepn	-1.12322	0.000586594	0.00538093	DOWN
Mrps25	-0.450599	0.00058777	0.00538553	DOWN
Ticam1	0.577323	0.0005879	0.00538553	UP
Kcne3	2.43197	0.000588137	0.00538553	UP
Tmem159	-0.547855	0.000588967	0.00538995	DOWN
Wwp1	-0.434341	0.000590078	0.00539487	DOWN
Letm2	-1.03995	0.0005902	0.00539487	DOWN
Sntb1	0.791331	0.000592137	0.00540939	UP
1190007I07Rik	-0.715993	0.000594035	0.00542141	DOWN
Mapre1	0.323927	0.000594151	0.00542141	UP
Gpr141	2.49289	0.00059467	0.00542296	UP
Usp47	0.294852	0.000597349	0.00544419	UP
Kctd3	0.527697	0.00059929	0.00545867	UP
C1s1	-0.95694	0.000599981	0.00546177	DOWN
Tecr	-0.56889	0.000600491	0.0054632	DOWN
Ogfrl1	-0.52757	0.000603032	0.00548311	DOWN
Itk	-1.20925	0.000604218	0.0054884	DOWN
Cybrd1	-2.72728	0.000604322	0.0054884	DOWN
Tagln2	0.844696	0.000606725	0.005507	UP
Spsb3	0.641871	0.000608562	0.00552045	UP
Tufm	-0.501824	0.000611699	0.00554333	DOWN
Atp13a1	0.374162	0.000611798	0.00554333	UP
Cald1	0.741273	0.0006133	0.00555369	UP
Arid3a	1.46622	0.000618315	0.00559584	UP
Mcoln2	3.41229	0.000622764	0.00563282	UP
Gfm1	-0.588443	0.00062446	0.00564487	DOWN
Pdpn	1.7169	0.000625277	0.00564896	UP
Fkbp4	-0.879099	0.000627001	0.00566125	DOWN
Sac3d1	0.888591	0.000629112	0.00567595	UP
Plin2	1.40205	0.000629479	0.00567595	UP
Cxxc1	0.293418	0.000629726	0.00567595	UP
Entpd3	4.08709	0.000631126	0.00568526	UP
Senp8	-1.00805	0.000634005	0.00570788	DOWN
Ncbp1	0.346129	0.00064141	0.0057712	UP
B4gat1	-0.490581	0.000643071	0.00578279	DOWN
Eif2b3	0.545408	0.000643715	0.00578523	UP
Gm14548	3.48224	0.000647522	0.00581608	UP
Pde11a	-1.88056	0.000651718	0.00585038	DOWN
Prlr	-1.1216	0.000652326	0.00585212	DOWN
Hspa4l	-0.613915	0.00065304	0.00585212	DOWN
Steap3	-0.769857	0.000653043	0.00585212	DOWN
Limk1	0.753603	0.000655792	0.00587337	UP
Tnfrsf22	0.976484	0.000659118	0.00589975	UP
Kera	-4.09901	0.000659604	0.0059007	DOWN
Apoa5	4.36619	0.000661151	0.00591113	UP
Igf2bp2	2.62382	0.000661972	0.00591506	UP
Copg2	-0.421234	0.000663742	0.00592747	DOWN
Bbip1	-0.440947	0.000665459	0.00593939	DOWN
Pnpla8	-0.540852	0.000673282	0.00600575	DOWN
Gmfg	0.993632	0.000674408	0.00601085	UP
Vmn1r50	-2.07665	0.000674628	0.00601085	DOWN
Nrd1	-0.277535	0.000677957	0.00603704	DOWN
Pcnx3	0.710454	0.000683369	0.00608135	UP
Coq3	-0.478991	0.000683717	0.00608135	DOWN
Lrrc17	-1.3404	0.000684618	0.00608588	DOWN
Thtpa	-0.397354	0.000687034	0.00610387	DOWN
Ctu1	0.900101	0.000690354	0.00612985	UP
Zfp825	-0.645147	0.000691843	0.00613734	DOWN
Mbd3	0.394014	0.000691988	0.00613734	UP
Cxxc4	-1.42958	0.000693043	0.00614319	DOWN
Ndufv2	-0.622482	0.000693442	0.00614322	DOWN
Arc	2.21971	0.000694126	0.00614577	UP
Asb3	-0.538996	0.000694764	0.00614791	DOWN
Ankrd52	0.520179	0.000695739	0.00615303	UP
Samd12	-1.1444	0.00070052	0.00619178	DOWN
Rassf10	-1.68043	0.000705206	0.0062282	DOWN
Tnip2	0.669685	0.000705442	0.0062282	UP
Rlf	0.560976	0.000706536	0.00623431	UP
Tm2d1	-0.461015	0.000710426	0.00626507	DOWN
Dnajc15	-0.447609	0.000711226	0.00626856	DOWN
Selenop	-0.900576	0.000713619	0.00628609	DOWN
Hint3	-0.541447	0.000715885	0.00630247	DOWN
Ist1	0.354194	0.000720816	0.00633984	UP
H2afx	0.853545	0.000720947	0.00633984	UP
Cdc42se1	0.603243	0.000721979	0.00634321	UP
Rab8a	0.374888	0.000722353	0.00634321	UP
Atp6v1h	0.472348	0.000722557	0.00634321	UP
Klhl40	1.25142	0.000725431	0.00636485	UP
Rfk	-0.40765	0.000725867	0.00636507	DOWN
Npffr1	-1.82332	0.000726979	0.00637123	DOWN
Gatb	-0.631517	0.000727447	0.00637173	DOWN
Tmed4	-0.542914	0.000727971	0.00637272	DOWN
Zmym6	-0.672037	0.000733438	0.00641697	DOWN
Islr	-1.01887	0.000736185	0.00643737	DOWN
Glt28d2	-0.803911	0.000736901	0.00644	DOWN
Slc17a5	-0.725792	0.000739207	0.00645652	DOWN
Cdkn1c	-1.05555	0.000744521	0.00649927	DOWN
Zfp867	-0.478368	0.000747208	0.00651799	DOWN
Spire1	0.896535	0.000747505	0.00651799	UP
Nr3c2	-0.918866	0.000749441	0.0065312	DOWN
Nsun5	0.779376	0.000749902	0.00653156	UP
Rab5b	-0.238274	0.000750604	0.006534	DOWN
Kmt5a	-0.621388	0.000751507	0.00653819	DOWN
Nfia	-0.594433	0.000752476	0.00654296	DOWN
Spr	-0.468523	0.000754534	0.00655718	DOWN
Mettl9	0.494626	0.000756478	0.00657039	UP
Sbsn	-1.66435	0.000757081	0.00657195	DOWN
Slc47a1	-0.710417	0.000757968	0.00657598	DOWN
Slc25a19	-0.778558	0.000760534	0.00659455	DOWN
Mllt11	0.541961	0.000761985	0.00660345	UP
Pik3ap1	1.21068	0.000762444	0.00660373	UP
Timmdc1	-0.353237	0.000763529	0.00660945	DOWN
Pak3	2.04221	0.000764719	0.00661605	UP
Ier5	1.06922	0.000766329	0.00662603	UP
Pemt	2.10989	0.000766726	0.00662603	UP
Lasp1	0.808201	0.000768913	0.00664124	UP
Samsn1	2.09087	0.000771788	0.00666236	UP
Zfp157	-0.517118	0.000776258	0.00669722	DOWN
Mfsd4b3	-1.05504	0.000777693	0.00670587	DOWN
Enpp2	-1.05662	0.000780096	0.00672286	DOWN
1700029J07Rik	-1.51596	0.000781081	0.00672761	DOWN
Cbl	0.489172	0.000781977	0.00673159	UP
Cldn3	-4.78004	0.000782765	0.00673465	DOWN
Hnrnpab	0.392565	0.000791866	0.00680804	UP
Cul3	-0.258163	0.000792543	0.00680804	DOWN
Enpp5	-1.03356	0.000792612	0.00680804	DOWN
Zc3h18	0.356593	0.000793513	0.00681201	UP
Senp1	0.494058	0.000796879	0.00683503	UP
Frrs1	0.714072	0.000797075	0.00683503	UP
Mapk1ip1	-0.66449	0.00079796	0.00683884	DOWN
Txn1	0.407512	0.000799517	0.0068484	UP
Taf12	-0.444947	0.000801672	0.00686307	DOWN
Runx3	1.77213	0.000802571	0.00686698	UP
Maf1	-0.367228	0.000804543	0.00687671	DOWN
Tmem35b	-1.15639	0.000804594	0.00687671	DOWN
Sucla2	-0.517288	0.00080504	0.00687673	DOWN
Gpbp1l1	-0.327094	0.000805855	0.00687769	DOWN
Snx18	0.937281	0.000806038	0.00687769	UP
2310061I04Rik	-0.471183	0.000807279	0.00688107	DOWN
Gnao1	0.723481	0.000807321	0.00688107	UP
Btbd8	-0.980357	0.000808951	0.00689118	DOWN
Timm29	-0.275844	0.000811418	0.0069084	DOWN
Rars	0.358575	0.000812245	0.00691166	UP
Cdc42	0.307813	0.000813065	0.0069148	UP
Tirap	0.651676	0.000813506	0.0069148	UP
Pde12	0.548116	0.000816853	0.00693945	UP
Tmem167	0.440692	0.000820582	0.00696732	UP
Ntf3	-1.05867	0.000826815	0.0070164	DOWN
Plk3	2.23641	0.000827562	0.0070189	UP
Zfp120	-0.845048	0.000828278	0.00702114	DOWN
Mup7	3.4792	0.000833002	0.00705733	UP
Adora2b	1.42979	0.00083362	0.00705871	UP
Spi1	1.205	0.000834413	0.00706157	UP
Rusc2	0.843263	0.000837372	0.00708275	UP
Rnf167	-0.326096	0.000838856	0.00709144	DOWN
Rpl15	0.512731	0.000841738	0.00711193	UP
Hes6	-0.673604	0.000846197	0.00714571	DOWN
Nap1l3	-1.20129	0.000848411	0.00716052	DOWN
Rufy1	-0.332989	0.000849921	0.00716936	DOWN
Kctd10	0.685106	0.000850871	0.00716976	UP
Mllt3	-0.621013	0.000850893	0.00716976	DOWN
Fam122b	-0.669768	0.00086433	0.00727904	DOWN
Psd3	-0.70692	0.000865354	0.0072837	DOWN
Shb	1.3164	0.00086717	0.00729504	UP
Numa1	-0.44541	0.000873027	0.00733649	DOWN
Ppp1r12a	0.460852	0.000873043	0.00733649	UP
Fosb	3.21755	0.000876178	0.00735886	UP
Bcl2a1a	3.29202	0.000879982	0.0073868	UP
Setd1a	0.441864	0.000882867	0.00740702	UP
Gabpa	-0.347393	0.000890081	0.0074635	DOWN
Msl3	-0.392434	0.000891439	0.00747086	DOWN
Ldlrap1	0.521219	0.000892549	0.00747612	UP
Lrrc57	-0.361311	0.000893927	0.00748363	DOWN
LTO1	-0.548418	0.000894451	0.00748398	DOWN
Sgcb	-0.529463	0.000895104	0.00748541	DOWN
Serp1	0.693525	0.000897997	0.00750555	UP
Cnnm3	-0.566043	0.000900236	0.00752021	DOWN
Cyhr1	-0.393397	0.000904165	0.00754761	DOWN
Cdc37l1	-0.455252	0.000904488	0.00754761	DOWN
Aldh6a1	-0.65652	0.000909326	0.00758391	DOWN
Gsto2	-1.49957	0.000910337	0.00758826	DOWN
Kantr	-1.11152	0.000910864	0.00758858	DOWN
Wsb1	1.06758	0.000915828	0.0076233	UP
Atp1a2	-1.10659	0.000916014	0.0076233	DOWN
Nudt8	-0.515408	0.000920169	0.00765378	DOWN
Nudt3	-0.803454	0.000924096	0.00768232	DOWN
Lmf1	-0.833108	0.000925629	0.00769095	DOWN
Perm1	-0.766688	0.000933007	0.0077481	DOWN
Atn1	0.463406	0.000937618	0.00778223	UP
Cdan1	-0.766001	0.000940142	0.00779901	DOWN
Esyt1	0.870758	0.000946617	0.00784852	UP
Mdfi	2.1756	0.00094793	0.00785522	UP
Fdft1	-0.916513	0.000950493	0.00786803	DOWN
Gm4631	-0.580354	0.000950527	0.00786803	DOWN
Rhbdf2	0.815734	0.000950997	0.00786803	UP
Mthfd1l	1.65002	0.000953355	0.00788334	UP
Ywhag	0.56666	0.000956486	0.00790501	UP
Cutc	-0.581194	0.000959287	0.00792395	DOWN
Smarcb1	0.589992	0.00096213	0.00793622	UP
Nppa	1.89965	0.000962183	0.00793622	UP
Mpv17l	-1.09172	0.000962785	0.00793622	DOWN
Rgs19	0.806625	0.000962819	0.00793622	UP
Lifr	-0.70833	0.00096534	0.00795278	DOWN
Zfp398	-0.556421	0.000966183	0.00795551	DOWN
Prpf31	0.559365	0.000967138	0.00795914	UP
Intu	-0.698454	0.000968577	0.00796676	DOWN
Akap5	-1.25353	0.000971442	0.0079861	DOWN
Rab14	-0.217259	0.000972268	0.00798866	DOWN
Urgcp	0.442188	0.000978145	0.00803212	UP
Foxn2	0.453336	0.000979019	0.00803212	UP
Osbpl5	1.00821	0.000979111	0.00803212	UP
Klhl31	-0.855508	0.000989688	0.0081146	DOWN
Xrcc5	-0.562699	0.000992427	0.00813276	DOWN
Psmb9	-0.8337	0.000992985	0.00813304	DOWN
Abhd4	-0.32736	0.000994142	0.00813822	DOWN
Plppr3	1.94435	0.000995736	0.00814698	UP
Tgfb1	0.851284	0.000996901	0.0081521	UP
Mrpl41	-0.491558	0.000997413	0.0081521	DOWN
Kcnq5	1.34815	0.00100034	0.00817168	UP
Imp4	0.366643	0.00100242	0.00818438	UP
Schip1	-0.70825	0.0010063	0.00821174	DOWN
Usp20	0.693416	0.0010072	0.00821377	UP
Kbtbd13	-1.15033	0.0010076	0.00821377	DOWN
Jaml	2.54016	0.00100848	0.00821657	UP
Pdcd11	0.482524	0.0010096	0.00822141	UP
Clec4n	1.7278	0.00101167	0.00823397	UP
Tinagl1	0.927851	0.00101292	0.00823976	UP
Ppp4c	0.340552	0.00101457	0.00824891	UP
Dhx38	0.481784	0.00102004	0.00828899	UP
Ssr2	0.563148	0.00102146	0.00829626	UP
Trim41	0.360709	0.00102588	0.00832776	UP
Hmga2	2.51957	0.0010291	0.00834956	UP
Rfesd	-0.46749	0.00103429	0.00838725	DOWN
C1qtnf9	-0.810059	0.00103545	0.00839228	DOWN
Smc5	-0.396895	0.00103652	0.00839657	DOWN
Fbxo32	-0.748762	0.00103819	0.00840567	DOWN
Xylt1	1.27729	0.00103879	0.00840617	UP
Zbtb20	-0.73503	0.00104232	0.00843034	DOWN
Rsf1	-0.434291	0.00104335	0.00843328	DOWN
Apoc2	1.36381	0.00104377	0.00843328	UP
Zfp974	-0.757237	0.00104832	0.00846567	DOWN
Ces2e	-1.80281	0.0010523	0.00849339	DOWN
Atxn2l	0.359287	0.00105545	0.00851435	UP
Cox16	-0.502535	0.00105636	0.00851545	DOWN
A930033H14Rik	1.34369	0.00105668	0.00851545	UP
Snrnp40	0.427495	0.00105858	0.00852628	UP
Uba1	0.348366	0.00106043	0.00853676	UP
Ddx39	1.03267	0.00106269	0.00855056	UP
Zbtb44	-0.415165	0.00106505	0.00856345	DOWN
Mrpl24	-0.288971	0.0010654	0.00856345	DOWN
Gas8	-0.575459	0.00106837	0.00858292	DOWN
C8g	-0.998831	0.00106928	0.00858573	DOWN
Qrich1	0.330965	0.00107008	0.00858776	UP
Dyrk1a	0.307271	0.00107221	0.00860036	UP
Ndufs5	-0.471548	0.00107704	0.00863471	DOWN
Rhov	5.15603	0.00107808		UP
Plpp2	1.94506	0.0010794	0.00864909	UP
Slc25a42	-0.605986	0.00108277	0.00867166	DOWN
Syk	1.0405	0.00108643	0.00869645	UP
Ppfibp2	-0.997806	0.00108723	0.00869841	DOWN
Tlr6	1.47345	0.00108811	0.00870097	UP
Anapc16	-0.435344	0.00109039	0.00871472	DOWN
Csrp3	0.769677	0.0010911	0.00871524	UP
Tmem138	0.769834	0.00109158	0.00871524	UP
Sumo1	-0.267143	0.00109243	0.00871755	DOWN
Errfi1	1.27624	0.00110322	0.0087984	UP
Gosr2	0.30892	0.0011037	0.0087984	UP
Gstcd	0.809841	0.0011046	0.00880107	UP
Cyp2j6	-0.613464	0.00110523	0.00880154	DOWN
Bcl2a1b	1.97174	0.00111173	0.00884877	UP
Enpp4	-0.375775	0.00111573	0.0088761	DOWN
Ppp1r15b	0.728366	0.00111778	0.00888783	UP
Frmd8	0.463059	0.00111882	0.00889152	UP
Lrtm1	-1.34038	0.00112326	0.00892223	DOWN
Neurl1a	-1.41287	0.00112417	0.00892491	DOWN
Sat2	-0.725858	0.001131	0.00897458	DOWN
Wdr45	-0.522594	0.0011319	0.00897711	DOWN
Ngrn	-0.60305	0.00113529	0.00899944	DOWN
Egflam	-0.828923	0.00113648	0.00900426	DOWN
Sprn	-1.38109	0.00114063	0.00902953	DOWN
Shprh	-0.459963	0.00114084	0.00902953	DOWN
Atp2a2	-0.61724	0.00115051	0.00910143	DOWN
Rhoa	0.328393	0.00115311	0.00911736	UP
Pde4b	1.33066	0.0011575	0.00914426	UP
Vangl1	0.514758	0.001158	0.00914426	UP
Pigv	-0.579101	0.00115828	0.00914426	DOWN
Clstn1	-0.436267	0.00116665	0.0092057	DOWN
Spryd3	0.743379	0.0011678	0.00920703	UP
Rps23	0.507861	0.00116801	0.00920703	UP
Rabep1	-0.357498	0.00117185	0.00923261	DOWN
Polr2h	0.601096	0.00117371	0.00924232	UP
Cd37	1.30101	0.00117427	0.00924232	UP
Hif1a	0.488957	0.00117743	0.00926179	UP
Pcdh15	-3.35425	0.00117794	0.00926179	DOWN
Cep57l1	-0.722772	0.00117991	0.00927263	DOWN
Hs1bp3	-0.664512	0.00118137	0.00927934	DOWN
Mrpl21	-0.422034	0.00118211	0.00928047	DOWN
Fga	2.97588	0.00118278	0.00928103	UP
Eif4e2	0.308352	0.00118655	0.00930412	UP
Has3	-1.73373	0.00118692	0.00930412	DOWN
Mrps15	-0.463789	0.00118867	0.00931317	DOWN
Tada2b	0.411014	0.00118985	0.00931769	UP
Calca	3.58995	0.00119373	0.00934334	UP
Anp32a	-0.45964	0.00119466	0.00934593	DOWN
Dusp28	-0.706849	0.00120779	0.00944389	DOWN
Sec61b	0.809484	0.00121088	0.00946326	UP
AW549877	-0.474169	0.00121185	0.00946611	DOWN
Dpysl5	-3.04494	0.0012128	0.00946875	DOWN
Hmgxb3	0.565347	0.00123109	0.00960668	UP
Arl8b	-0.319342	0.00123431	0.00962696	DOWN
Ndufs4	-0.390136	0.00123641	0.0096385	DOWN
Tgif1	1.35936	0.0012384	0.0096492	UP
Sf3b2	-0.269099	0.00124365	0.00968527	DOWN
Zbed4	0.593257	0.00124632	0.00970115	UP
Stxbp2	0.813717	0.0012479	0.0097056	UP
Nkrf	0.583268	0.0012482	0.0097056	UP
Mup3	3.22009	0.00124877	0.0097056	UP
Tmc7	-1.09987	0.00125051	0.00971432	DOWN
[truncated: 19,839 more rows]

## Sheet: Heart (6h)
Gene name	L2FC	P-VALUE	P-ADJ	DIRECTION
Elf3	-37.7772	1.11651e-106	1.64898e-102	DOWN
Hspa1a	6.97289	2.16229e-37	1.59674e-33	UP
Rab25	-32.8702	7.98964e-37	3.9333e-33	DOWN
Hspa1b	7.23114	1.30604e-36	4.82223e-33	UP
Hgfac	18.1737	1.01311e-29	2.99252e-26	UP
Atp4a	24.4878	1.58484e-25	3.90108e-22	UP
Pdzk1	17.2138	4.20549e-24	8.87299e-21	UP
Lipc	18.0789	2.64405e-23	4.88125e-20	UP
Cblc	17.6012	1.00478e-19	1.64884e-16	UP
Otud1	2.94501	5.98235e-18	8.60991e-15	UP
Defb1	16.2877	6.41269e-18	8.60991e-15	UP
Klhl41	1.71386	2.08837e-15	2.55614e-12	UP
Adamdec1	-16.6206	2.24997e-15	2.55614e-12	DOWN
Klhl40	2.93151	2.99398e-15	3.15844e-12	UP
Synpo2l	2.16361	9.99135e-15	9.83749e-12	UP
Cldn14	15.7463	5.01217e-14	4.62655e-11	UP
Rnf115	1.58161	1.98871e-13	1.72772e-10	UP
Atf3	3.94694	8.62635e-13	7.07792e-10	UP
Dnajb1	2.54601	4.84915e-12	3.76932e-09	UP
Slfn1	2.70977	1.32741e-11	9.80225e-09	UP
Cxcr2	3.0034	1.42255e-11	1.00046e-08	UP
Nmrk2	3.30613	2.12188e-11	1.42446e-08	UP
Lmcd1	2.1211	3.98241e-11	2.55723e-08	UP
Flnc	2.54027	5.81084e-11	3.57584e-08	UP
Ildr1	16.2951	6.93179e-11	4.09502e-08	UP
Rbm18	0.975295	1.16665e-10	6.62702e-08	UP
Ankrd2	2.23288	3.65955e-10	2.00177e-07	UP
Uck2	1.56995	5.25125e-10	2.76985e-07	UP
Slfn4	3.31045	6.67001e-10	3.39687e-07	UP
Fgl2	1.64703	1.00156e-09	4.93069e-07	UP
Arf6	1.33034	1.2688e-09	6.0448e-07	UP
Cd300lf	3.53305	1.55821e-09	7.19165e-07	UP
Xirp1	2.05054	1.73389e-09	7.75996e-07	UP
Sat1	1.50366	2.17199e-09	9.43475e-07	UP
Efhd2	1.41902	2.29647e-09	9.69046e-07	UP
Lif	3.08639	3.14491e-09	1.2902e-06	UP
Il18rap	3.32199	4.91826e-09	1.96318e-06	UP
Eddm3b	16.2146	1.03056e-08	4.0022e-06	UP
Fos	3.9223	1.05685e-08	4.0022e-06	UP
Rnd1	1.76728	1.10468e-08	4.07875e-06	UP
Ubash3b	2.11578	2.42137e-08	8.72224e-06	UP
Ctgf	2.42012	2.6469e-08	9.30765e-06	UP
Rras2	1.37203	2.95578e-08	1.01521e-05	UP
Cxcl2	3.24157	4.52103e-08	1.51752e-05	UP
Nfkbiz	1.54163	6.27396e-08	2.05911e-05	UP
Slc16a3	2.41473	8.33947e-08	2.67751e-05	UP
Hspb1	1.80399	8.70357e-08	2.73496e-05	UP
Thbs4	1.06995	8.90118e-08	2.73878e-05	UP
Actg1	1.37699	1.04195e-07	3.14052e-05	UP
Myh9	0.988784	1.10125e-07	3.25289e-05	UP
1110002E22Rik	1.97923	1.22909e-07	3.55931e-05	UP
Plcxd2	2.90761	1.28704e-07	3.65544e-05	UP
Gpr35	1.84632	1.31948e-07	3.67687e-05	UP
Inhba	2.433	1.78372e-07	4.87846e-05	UP
Hsp90aa1	1.32977	2.07159e-07	5.56279e-05	UP
Sertad1	1.42016	2.26979e-07	5.98615e-05	UP
Stx11	1.71204	2.5213e-07	6.50935e-05	UP
Hcar2	5.14371	2.55632e-07	6.50935e-05	UP
Il1rn	3.31791	2.97174e-07	7.43893e-05	UP
Adamts1	2.15551	3.1421e-07	7.65555e-05	UP
S100a8	2.73969	3.16353e-07	7.65555e-05	UP
Fosb	4.76755	3.25313e-07	7.65555e-05	UP
Txnrd1	0.705848	3.26562e-07	7.65555e-05	UP
Fhl1	1.52466	3.6091e-07	8.32857e-05	UP
Trem1	2.71234	3.73573e-07	8.40725e-05	UP
F10	1.95185	3.75705e-07	8.40725e-05	UP
Nppb	2.55226	3.90022e-07	8.59735e-05	UP
Hbegf	2.76892	4.15898e-07	9.03294e-05	UP
Ereg	2.31618	5.12885e-07	0.00010978	UP
Csrnp1	1.57423	5.47121e-07	0.000114266	UP
Thbs1	2.74963	5.49318e-07	0.000114266	UP
Junb	1.63563	6.79754e-07	0.000139435	UP
Gm5483	3.774	7.25483e-07	0.000146776	UP
Cd14	1.71283	8.01724e-07	0.000160009	UP
F5	3.02609	8.57191e-07	0.000168798	UP
Actb	1.10822	8.84055e-07	0.000171798	UP
Usp53	1.0796	9.4746e-07	0.000181728	UP
Cyr61	2.37974	9.67092e-07	0.000183115	UP
Xpo6	0.839004	1.2615e-06	0.000235836	UP
Ppme1	0.897481	1.28153e-06	0.000236586	UP
Nfam1	-6.7597	1.37845e-06	0.00024837	DOWN
Glipr1	2.29239	1.38034e-06	0.00024837	UP
Actr3	0.535762	1.39581e-06	0.00024837	UP
Eif2b5	2.78755	1.45451e-06	0.000254844	UP
Itga5	1.7607	1.4667e-06	0.000254844	UP
Tgfb2	1.76675	1.52167e-06	0.000261321	UP
Il6	2.72998	1.55342e-06	0.000263707	UP
Ptgs2	2.52331	1.66735e-06	0.000279831	UP
Zc3h12a	1.11592	1.70539e-06	0.000282999	UP
Map2k3	0.650408	1.81288e-06	0.000297493	UP
Rtn4	1.0905	1.83528e-06	0.00029786	UP
Smad1	0.960191	2.10706e-06	0.000338251	UP
Wdr1	0.667357	2.13648e-06	0.000339287	UP
Picalm	1.05486	2.1833e-06	0.000343034	UP
Rrp12	0.977717	2.29996e-06	0.000357559	UP
Plscr1	1.71312	2.64773e-06	0.000407337	UP
Fzd1	0.969646	2.73435e-06	0.000415195	UP
Srgn	1.2765	2.75503e-06	0.000415195	UP
Rpl7l1	0.463829	2.87692e-06	0.000429184	UP
Csf3r	2.36979	2.99671e-06	0.000442584	UP
Ell2	1.17261	3.45184e-06	0.000504755	UP
Map2k1	0.385417	3.53109e-06	0.000511282	UP
Bcl10	0.481463	3.71214e-06	0.000532278	UP
Wfdc21	2.34262	3.77151e-06	0.000535591	UP
Sacs	1.29179	3.81189e-06	0.00053576	UP
Serpine1	2.80365	3.84526e-06	0.00053576	UP
Osm	3.56861	4.03564e-06	0.000557031	UP
Nts	2.1871	4.55799e-06	0.000623306	UP
Sell	1.96831	4.86154e-06	0.000658717	UP
Tjap1	0.712527	5.20633e-06	0.00069902	UP
Fam107b	1.4229	5.34744e-06	0.000704765	UP
Fem1b	0.731463	5.34774e-06	0.000704765	UP
Tmem175	-0.589858	5.40527e-06	0.000704765	DOWN
Lmnb1	1.07726	5.43999e-06	0.000704765	UP
Dbn1	1.63812	6.60241e-06	0.000847922	UP
Zfp568	1.04912	7.4004e-06	0.000942211	UP
Rhoc	0.958896	7.54299e-06	0.000944522	UP
Tubb6	1.29862	7.54646e-06	0.000944522	UP
Ugdh	1.08445	8.6642e-06	0.00107531	UP
Mmp8	2.70834	8.85313e-06	0.0010896	UP
Capza1	0.448972	9.10869e-06	0.00111179	UP
Slc6a12	4.07068	9.3794e-06	0.00113545	UP
Sema6b	-6.51985	1.001e-05	0.00120193	DOWN
1810030O07Rik	-0.504043	1.04978e-05	0.00125034	DOWN
Sdc4	1.43137	1.09191e-05	0.00129011	UP
Eif4a1	0.656629	1.16176e-05	0.00136175	UP
Xirp2	1.47526	1.28368e-05	0.0014928	UP
Akap12	2.99356	1.37927e-05	0.00159144	UP
Nuak1	1.16764	1.41323e-05	0.00161799	UP
AI987944	-0.604227	1.51201e-05	0.00171541	DOWN
Tpm3	0.652699	1.52156e-05	0.00171541	UP
Hdc	2.3841	1.55441e-05	0.00173917	UP
Met	1.00551	1.60516e-05	0.00178246	UP
Il1b	2.43651	1.65124e-05	0.00181994	UP
Pprc1	0.908063	1.72043e-05	0.00188215	UP
Nop58	0.867627	1.83709e-05	0.001995	UP
Cd44	1.69196	1.93327e-05	0.00208412	UP
Nub1	-0.44174	1.95497e-05	0.00209224	DOWN
Ccr1	1.37712	1.99311e-05	0.00211416	UP
Sbno2	1.04862	2.00407e-05	0.00211416	UP
Sphk1	2.58562	2.06855e-05	0.0021667	UP
Zfp697	1.42316	2.38765e-05	0.00248333	UP
Ppp1r15a	1.06988	2.52896e-05	0.00261191	UP
S100a9	2.46738	2.66667e-05	0.002735	UP
Brwd1	1.43831	2.73462e-05	0.00278535	UP
Zfp60	-0.694863	2.77413e-05	0.00279233	DOWN
3425401B19Rik	-0.67653	2.77928e-05	0.00279233	DOWN
Mcemp1	2.80173	2.83734e-05	0.00283139	UP
Ralb	0.584012	2.8777e-05	0.0028524	UP
Btla	4.87512	3.03817e-05	0.00299138	UP
Rnf2	0.656066	3.09853e-05	0.00303061	UP
Asprv1	2.92081	3.17067e-05	0.00308076	UP
Nop56	0.57656	3.19463e-05	0.00308375	UP
Itpkc	1.1517	3.24426e-05	0.00311133	UP
Dusp10	2.0068	3.27616e-05	0.00312165	UP
Nlrp12	3.98133	3.76177e-05	0.00356139	UP
Mapk1ip1l	0.410178	3.876e-05	0.00364616	UP
Plaur	2.77887	3.95999e-05	0.00370159	UP
Mmp9	2.72702	4.11275e-05	0.0038202	UP
Cd80	1.59008	4.38748e-05	0.00404992	UP
Col18a1	0.907284	4.66109e-05	0.00427575	UP
Fpr1	3.17499	4.87042e-05	0.00443172	UP
Klf5	2.62921	4.89112e-05	0.00443172	UP
Ifitm6	2.22222	4.98721e-05	0.00449122	UP
Tgm1	1.86998	5.02091e-05	0.00449417	UP
Rusc2	1.02486	5.12737e-05	0.00456182	UP
Tmem88b	1.53238	5.16401e-05	0.0045669	UP
Nt5e	1.16958	5.26059e-05	0.00460618	UP
Selplg	1.62825	5.2708e-05	0.00460618	UP
Arpc5	0.506793	5.40276e-05	0.00469373	UP
Il1f9	2.01155	5.44646e-05	0.00470402	UP
Siah2	0.920999	5.65796e-05	0.00483324	UP
Fkbp1a	0.406071	5.66153e-05	0.00483324	UP
Mtif2	-0.438157	5.92177e-05	0.00502636	DOWN
Socs3	1.60763	6.03193e-05	0.0050906	UP
Plk2	1.29875	6.10176e-05	0.00512028	UP
Ros1	23.4731	6.21327e-05	0.00518439	UP
Cass4	3.1673	6.32766e-05	0.00525018	UP
Oas3	2.67384	6.39466e-05	0.00527613	UP
Calm2	0.500099	6.73293e-05	0.00552437	UP
Cytip	1.97228	6.84821e-05	0.00558791	UP
Ptcd1	-0.550472	7.14658e-05	0.00579933	DOWN
Ctla2a	1.13377	7.64681e-05	0.00617135	UP
Fpr2	2.6061	7.91211e-05	0.00635076	UP
Apold1	1.95433	8.09107e-05	0.0064593	UP
Eif6	0.565561	8.31405e-05	0.00660163	UP
Gmeb2	0.521231	8.48059e-05	0.00669785	UP
Nppa	2.25302	9.06248e-05	0.00708648	UP
Gm45871	-0.731226	9.094e-05	0.00708648	DOWN
Phc2	0.481133	9.11661e-05	0.00708648	UP
Actn4	0.674235	9.24282e-05	0.00714698	UP
Pi15	1.44442	9.33401e-05	0.00717989	UP
Fhad1	3.08936	9.49777e-05	0.007268	UP
2310057M21Rik	1.16185	0.000113585	0.00864709	UP
Gnl3	0.797595	0.000115416	0.0087414	UP
Ammecr1	0.550104	0.000116367	0.00876852	UP
Dyrk3	2.69246	0.000117109	0.0087796	UP
Tiam2	2.32668	0.000119034	0.00887887	UP
Ifitm2	0.472122	0.000121839	0.00904238	UP
Arv1	1.32049	0.000127525	0.00941709	UP
Cd24a	1.7248	0.000128435	0.00943713	UP
Pom121	0.561143	0.000129518	0.00946953	UP
Tom1l1	-0.479378	0.00013057	0.00949943	DOWN
Habp2	0.963796	0.000131332	0.00950809	UP
Oasl1	1.87965	0.00013442	0.00968414	UP
2610008E11Rik	-0.406189	0.000135446	0.00971071	DOWN
Cdnf	-0.470583	0.00013789	0.00983818	DOWN
Srxn1	0.748526	0.000138958	0.00986668	UP
Myl6	0.430963	0.000142456	0.0100666	UP
Rfc1	-0.43877	0.000145965	0.0102655	DOWN
Il1r2	3.27113	0.000151982	0.010638	UP
Rel	0.743982	0.000164581	0.0114655	UP
Sema7a	0.834309	0.000167152	0.01159	UP
Necap1	0.369504	0.000169958	0.0117295	UP
Egr1	2.1794	0.000175842	0.0120791	UP
Otulin	0.494711	0.000185319	0.0126712	UP
Thbd	1.47554	0.000189665	0.0129086	UP
Kcna7	-0.78887	0.00019409	0.0131257	DOWN
Tsc22d1	1.02969	0.000194633	0.0131257	UP
Grwd1	0.781699	0.000198858	0.0133497	UP
Mxd1	0.83436	0.000200275	0.013384	UP
Pgf	1.92857	0.000209144	0.0138797	UP
Ptbp1	0.694673	0.000209572	0.0138797	UP
Ltb4r1	2.23279	0.000213999	0.0141096	UP
Sirpb1b	3.16635	0.000216813	0.0142316	UP
Ccl4	3.19394	0.000222004	0.0145078	UP
Lrrc14b	-0.612535	0.000225618	0.0145725	DOWN
Rnf19a	0.53631	0.000225626	0.0145725	UP
Nkap	-0.415432	0.000226188	0.0145725	DOWN
Hilpda	1.36094	0.00022694	0.0145725	UP
Irf8	0.946817	0.000245248	0.01568	UP
Vasp	0.753285	0.000248242	0.015803	UP
Gprc5a	1.99968	0.000253659	0.0160463	UP
Btg2	1.42541	0.000254237	0.0160463	UP
Pgm2	0.846139	0.000256786	0.0160876	UP
Kdm6b	0.721529	0.00025759	0.0160876	UP
Edn1	1.0946	0.000258703	0.0160876	UP
Arc	2.33282	0.000259249	0.0160876	UP
Bcar1	0.840117	0.000260539	0.0161	UP
Elavl1	0.432566	0.000262718	0.016167	UP
Cltb	0.601394	0.000264994	0.0162394	UP
Rasl11b	1.54674	0.000266788	0.0162477	UP
Ehbp1	0.570656	0.000267329	0.0162477	UP
Csf2rb	1.47065	0.000270084	0.0163478	UP
Eif1a	0.811927	0.000281958	0.0169969	UP
H2-Q10	2.39316	0.000292236	0.0175428	UP
Samd4b	0.536727	0.00029339	0.0175428	UP
Ier2	1.1284	0.000304055	0.018043	UP
Gch1	0.801379	0.000304198	0.018043	UP
Trim23	-0.41107	0.000322398	0.019046	DOWN
Tsc22d2	0.710407	0.000332315	0.0194054	UP
Mapre1	0.34654	0.000332806	0.0194054	UP
Frat2	1.18327	0.00033608	0.0194054	UP
Ero1l	0.660965	0.000336586	0.0194054	UP
Sdcbp	0.398471	0.000337864	0.0194054	UP
Siglece	1.55275	0.000339228	0.0194054	UP
Pde12	0.59098	0.000339359	0.0194054	UP
Litaf	1.15186	0.000339954	0.0194054	UP
Adam12	2.19449	0.000340308	0.0194054	UP
Ackr1	2.16584	0.000349213	0.0198036	UP
Zfp943	-0.484696	0.000349973	0.0198036	DOWN
Abi1	0.429846	0.000355995	0.0200675	UP
Wisp1	1.49299	0.000368072	0.0205827	UP
Ripk1	0.475499	0.000369027	0.0205827	UP
Simc1	0.672624	0.000369316	0.0205827	UP
Dot1l	0.6958	0.000371559	0.0206299	UP
AA467197	3.10492	0.000375519	0.0207507	UP
Ier3	1.53672	0.000376584	0.0207507	UP
Zfp729a	0.983317	0.00037795	0.0207507	UP
Lpxn	1.37753	0.000382861	0.0208841	UP
Lysmd1	-0.509388	0.000383208	0.0208841	DOWN
Ppan	0.969525	0.000385971	0.0209574	UP
Relt	1.62904	0.000399079	0.0215682	UP
Cap1	0.394328	0.000400141	0.0215682	UP
2610044O15Rik8	-0.584341	0.000406105	0.02181	DOWN
Samsn1	2.30794	0.00041155	0.0220224	UP
Gadd45g	1.8423	0.000416478	0.0222057	UP
A730049H05Rik	2.86927	0.000419201	0.0222704	UP
Ptpn21	0.642967	0.000421134	0.0222793	UP
Zfp949	-0.596945	0.000422385	0.0222793	DOWN
Cxcl1	2.10543	0.0004247	0.0223217	UP
Isg20l2	0.538442	0.000428785	0.022386	UP
Hgd	4.2818	0.000428956	0.022386	UP
Dclk1	1.58975	0.000432474	0.0224902	UP
Tfpi2	1.23264	0.000434752	0.0225293	UP
Kdm5c	0.519411	0.000436884	0.0225606	UP
Gm10382	2.26528	0.000444712	0.0228535	UP
Usf1	-0.524561	0.00044565	0.0228535	DOWN
Rbm47	1.25389	0.000458778	0.0232489	UP
Dyrk1a	0.33021	0.000459299	0.0232489	UP
Adamts9	1.31611	0.000459551	0.0232489	UP
Zswim9	-0.607079	0.000459658	0.0232489	DOWN
Fbxw11	0.287399	0.000470236	0.0237028	UP
Peak1	0.794786	0.000484304	0.0243288	UP
Cgrrf1	-0.382946	0.000496821	0.0248731	DOWN
Spry2	1.08405	0.000506064	0.0252502	UP
Ttc9	1.47243	0.000533458	0.0265274	UP
Atp8b4	1.93651	0.000544247	0.0269731	UP
Plek	1.2249	0.000549322	0.0271258	UP
Adamts4	2.46893	0.000551709	0.0271258	UP
Gdf15	2.82153	0.000552839	0.0271258	UP
Tspan9	0.758134	0.000554745	0.0271292	UP
Cfap97	-0.481384	0.000562307	0.0274083	DOWN
Tarm1	3.11845	0.000567474	0.0275692	UP
Ptpn12	0.761145	0.000575804	0.0278821	UP
Pex10	-0.545113	0.000580051	0.027996	DOWN
Mkks	-0.599835	0.00058585	0.0281371	DOWN
Tmem41b	0.686675	0.000586867	0.0281371	UP
Qsox1	0.625915	0.00058869	0.0281371	UP
Slc10a3	0.712428	0.000596531	0.0284106	UP
Zfp146	0.494633	0.000598642	0.0284106	UP
Odc1	0.665672	0.000600182	0.0284106	UP
Fam91a1	0.381561	0.000602275	0.0284185	UP
Nr4a2	2.13137	0.000608435	0.0286177	UP
Eaf1	0.498588	0.000629982	0.0295371	UP
Ctdp1	0.638341	0.000634563	0.0296578	UP
Nedd9	1.2484	0.00063714	0.0296843	UP
Sh3pxd2b	0.823149	0.000639171	0.0296853	UP
Aagab	-0.47365	0.000642136	0.0297295	DOWN
Pcnx	-0.376731	0.000645339	0.0297844	DOWN
Akap13	0.44974	0.000651532	0.0299766	UP
Pafah1b2	0.330642	0.000658991	0.0301159	UP
Dhrs9	2.52812	0.000659322	0.0301159	UP
Adamts8	4.48686	0.000660678	0.0301159	UP
Phospho2	-0.454399	0.000663157	0.0301359	DOWN
Prg4	1.11032	0.000670975	0.0303976	UP
Osbpl7	-5.25555	0.00069079	0.0311996	DOWN
Cemip2	0.713694	0.00069609	0.0313431	UP
Ptx3	1.70599	0.000702125	0.0314478	UP
Kctd11	1.09049	0.000702672	0.0314478	UP
Kctd17	0.792514	0.000714153	0.031865	UP
Gm6377	1.89058	0.000724032	0.0320152	UP
Cldnd1	0.470399	0.000724233	0.0320152	UP
Birc3	0.714342	0.000725899	0.0320152	UP
Rmdn2	-0.565099	0.00072619	0.0320152	DOWN
Arpc1b	0.500626	0.000748692	0.032909	UP
Txlnb	-0.458142	0.000760346	0.033275	DOWN
Zfp326	0.689323	0.000761524	0.033275	UP
Mex3c	0.519003	0.000764619	0.0332943	UP
Ehd4	0.637099	0.000766475	0.0332943	UP
Sprr1a	3.4293	0.000782606	0.0338953	UP
Zfp593	0.706674	0.000813176	0.0351163	UP
Mup18	6.20624	0.000817702	0.0351361	UP
Zswim4	0.701852	0.00081839	0.0351361	UP
Glipr2	1.1953	0.000828416	0.0354634	UP
Cebpzos	-0.465785	0.000840693	0.0358357	DOWN
Ctu2	0.658963	0.000841967	0.0358357	UP
Ifitm1	1.01551	0.000852214	0.0361562	UP
1190002N15Rik	0.840232	0.000854391	0.0361562	UP
Arrdc4	0.691554	0.000863673	0.0363915	UP
Celf1	0.256897	0.000864881	0.0363915	UP
Rdh12	3.45503	0.000894393	0.0375264	UP
Spry4	1.42645	0.000908733	0.0380201	UP
Errfi1	1.2948	0.000913436	0.0381089	UP
Mta2	0.323399	0.000931811	0.0386642	UP
Nup54	0.545508	0.000931983	0.0386642	UP
Tent5b	1.30423	0.000953577	0.0393428	UP
Nbr1	-0.44875	0.000953668	0.0393428	DOWN
Zfp36	0.972467	0.000960081	0.039497	UP
Ier5	1.04782	0.000964406	0.0394985	UP
Cdc42ep4	0.639509	0.000965465	0.0394985	UP
March3	0.929183	0.000976601	0.0398437	UP
Rpl31	0.406948	0.000985101	0.0400798	UP
Oxsm	-0.459085	0.00099184	0.0402431	DOWN
Tns3	0.777696	0.00100128	0.0405146	UP
Cfl1	0.457703	0.00100766	0.0406068	UP
Ifit1bl1	-0.675192	0.00100905	0.0406068	DOWN
Agt	1.15501	0.00101939	0.0409114	UP
Armt1	-0.399496	0.00103076	0.0412555	DOWN
Dnajb4	0.623894	0.00103991	0.0415093	UP
Gnb1l	-3.39433	0.00106104	0.0422387	DOWN
Ntpcr	-0.472035	0.001067	0.0423616	DOWN
Rnd3	0.9382	0.00106989	0.0423624	UP
Tnfaip6	1.45196	0.00109025	0.0430532	UP
Neo1	-0.402121	0.00109588	0.0431601	DOWN
Fam168b	0.280451	0.00110864	0.0435464	UP
Thtpa	-0.394777	0.00111478	0.0436715	DOWN
Stk40	0.56067	0.00111919	0.0437217	UP
Zbed5	2.15866	0.00112198	0.0437217	UP
Fmnl2	0.85247	0.00112901	0.0437285	UP
Mast4	0.776024	0.00113136	0.0437285	UP
Arg1	1.56383	0.00113282	0.0437285	UP
Ccl3	2.45965	0.001134	0.0437285	UP
Hsd3b3	3.61474	0.00115819	0.044545	UP
Tnc	1.72479	0.00118002	0.045267	UP
Enah	1.27542	0.00118611	0.045291	UP
Pde4b	1.32658	0.00118678	0.045291	UP
Zfp763	-0.861213	0.00122906	0.0467836	DOWN
Kctd6	0.653531	0.00124654	0.0473269	UP
Crebl2	-0.500992	0.00129651	0.049098	DOWN
Zfp775	-0.601417	0.00130063	0.0491279	DOWN
Rai14	0.740741	0.00130615	0.0492106	UP
Slfn2	0.918661	0.00132287	0.0497137	UP
Ppp1r18	0.770996	0.00134461	0.0504024	UP
Ch25h	1.7059	0.00135899	0.0507672	UP
Slc30a4	0.477351	0.00136573	0.0507672	UP
Ugt3a2	3.43369	0.00136696	0.0507672	UP
Azin1	0.824543	0.00136809	0.0507672	UP
Phlda1	1.95042	0.00138667	0.0512137	UP
Cd33	1.20196	0.00138706	0.0512137	UP
Utp18	0.504868	0.00139121	0.0512388	UP
Rufy1	-0.326212	0.00139556	0.0512712	DOWN
Rrp15	0.724579	0.00140811	0.0516041	UP
Csnk1d	0.294776	0.00146066	0.0533972	UP
Nuak2	0.989574	0.00147611	0.0538287	UP
Sla	1.29	0.00148063	0.0538605	UP
Flnb	0.801014	0.00148991	0.0539529	UP
Gm10309	2.10539	0.00149047	0.0539529	UP
Mfsd14a	0.293929	0.00149638	0.0540341	UP
Nme1	0.494762	0.00150673	0.0542753	UP
Cxcl10	2.96188	0.00151267	0.0542802	UP
Myl4	2.21625	0.00151786	0.0542802	UP
Parp1	-0.454465	0.00151789	0.0542802	DOWN
Zyx	0.638571	0.00154174	0.0549997	UP
Tnfaip3	1.23251	0.00155199	0.0552323	UP
Cpeb3	-0.354621	0.0015583	0.0553234	DOWN
Klf7	0.740021	0.00157729	0.0557848	UP
Dnajb5	0.465503	0.00157949	0.0557848	UP
Wdfy1	0.396964	0.00158445	0.0557848	UP
Chmp4b	0.311345	0.0015864	0.0557848	UP
Pabpc1	0.312939	0.00159437	0.0559319	UP
Ptbp2	0.489786	0.00161713	0.0564532	UP
Eif5	0.451103	0.00161782	0.0564532	UP
Trnt1	-0.308031	0.0016207	0.0564532	DOWN
Zfp930	-0.447607	0.00163155	0.056587	DOWN
Ankrd10	1.17342	0.00163221	0.056587	UP
Zfp839	-0.500036	0.00165146	0.057034	DOWN
Lpin3	0.957622	0.00165572	0.057034	UP
Aptx	-0.525487	0.00166173	0.057034	DOWN
Ap5m1	-0.433369	0.00167029	0.057034	DOWN
2010111I01Rik	0.817786	0.00167067	0.057034	UP
Mfap1a	-0.401546	0.0016714	0.057034	DOWN
Tmem126b	-0.528262	0.00167213	0.057034	DOWN
Fnbp4	0.374262	0.00169087	0.0575401	UP
Ddx21	0.465028	0.0017107	0.0580812	UP
Nfil3	1.14912	0.00172265	0.0583387	UP
Rufy2	-0.546563	0.00173009	0.0583387	DOWN
Wsb1	1.02316	0.00173013	0.0583387	UP
Ky	-1.3392	0.001748	0.0588069	DOWN
Ttc30b	-0.583706	0.00175525	0.0589166	DOWN
Akap2	1.22536	0.00176018	0.0589481	UP
Arhgdia	0.427329	0.00178273	0.0595683	UP
Adss	0.466538	0.00178795	0.0596078	UP
Cttnbp2nl	0.723177	0.00179971	0.0598647	UP
Gm13889	1.40665	0.00180981	0.0600654	UP
Mafg	0.40116	0.00182125	0.0603094	UP
Rap1b	0.478141	0.00185093	0.0611553	UP
Dmgdh	3.13058	0.00188822	0.062245	UP
Gpr34	-1.35163	0.00189234	0.062245	DOWN
Slc2a1	1.04594	0.001901	0.062286	UP
Ikzf4	1.67526	0.00190554	0.062286	UP
Tax1bp3	0.48172	0.00190624	0.062286	UP
Epha2	1.2409	0.0019238	0.0627209	UP
Car3	2.15051	0.00192815	0.0627242	UP
Cnnm3	-0.52006	0.00193299	0.0627437	DOWN
Zfp712	-0.80174	0.00194356	0.0628675	DOWN
Ctps	0.692158	0.00194936	0.0628675	UP
Rnf4	0.450704	0.00194958	0.0628675	UP
Csf2ra	0.862679	0.00195864	0.0630222	UP
Nras	0.450141	0.00196365	0.063046	UP
4931414P19Rik	-0.840703	0.00199785	0.063829	DOWN
Gpr161	0.864911	0.00199951	0.063829	UP
Rps2	0.313571	0.00200101	0.063829	UP
Mtpn	0.423614	0.00204073	0.064956	UP
Rbmxl1	0.417639	0.00209346	0.066491	UP
Kcne4	1.1136	0.00209888	0.0664969	UP
Swap70	0.587859	0.00210265	0.0664969	UP
Nifk	0.468145	0.00212275	0.0669376	UP
Dhtkd1	-0.755004	0.00212565	0.0669376	DOWN
C9	3.16846	0.00213909	0.0672175	UP
Prelid1	0.518621	0.00214871	0.0673765	UP
Hpd	2.67964	0.00215982	0.0675813	UP
Nup153	0.381785	0.00218299	0.0681619	UP
Tpm4	0.862184	0.00221835	0.06912	UP
Nr4a3	2.25212	0.00226624	0.0704635	UP
Trappc12	-0.335706	0.00228472	0.0708887	DOWN
Olfr1033	0.959848	0.00229954	0.0711509	UP
Havcr2	1.55418	0.00230454	0.0711509	UP
Gatad2a	0.49882	0.00230762	0.0711509	UP
Tra2b	0.496666	0.00231525	0.0712372	UP
Rab5b	-0.21734	0.00233183	0.0715982	DOWN
Midn	0.711988	0.0023514	0.0720495	UP
Col27a1	2.20398	0.00243614	0.0744079	UP
Zfp335	0.481579	0.00243845	0.0744079	UP
Mafk	0.752765	0.00245487	0.0747545	UP
1700025G04Rik	0.426079	0.00246553	0.0748534	UP
Selp	1.62868	0.00246825	0.0748534	UP
Smad7	0.901553	0.00248505	0.0752084	UP
Adam8	2.23978	0.00250019	0.0755118	UP
Wdr43	0.386605	0.00250719	0.0755688	UP
Slc25a25	1.40547	0.00255321	0.0767992	UP
Sgo2a	-0.708104	0.00255905	0.0768183	DOWN
Itgb3	1.20786	0.00257317	0.0770856	UP
Fgd6	0.645456	0.00258126	0.0770922	UP
Stc1	1.23643	0.00258868	0.0770922	UP
Dgkh	2.86682	0.00258906	0.0770922	UP
Gnai3	0.456006	0.00259979	0.0772108	UP
Dusp5	2.22735	0.00260349	0.0772108	UP
Uba2	0.303429	0.00261413	0.0773709	UP
Zfp65	-0.568651	0.00262372	0.0774995	DOWN
Gm4737	-7.54395	0.00267338	0.078771	DOWN
Zmat1	-0.723214	0.00267743	0.078771	DOWN
2010315B03Rik	-0.492507	0.00270605	0.0794502	DOWN
Eef1e1	0.63556	0.00271326	0.0794502	UP
Sp2	0.38805	0.00271805	0.0794502	UP
Pxn	0.540111	0.00272204	0.0794502	UP
Mob3c	0.546651	0.00273691	0.0797268	UP
Mob1b	0.382363	0.00274615	0.0797878	UP
Icam1	0.792638	0.00275889	0.0797878	UP
Atf1	0.345174	0.0027601	0.0797878	UP
Cyp2j5	3.10181	0.00276062	0.0797878	UP
Pard6b	1.25503	0.00281273	0.0811352	UP
Ube2j1	0.33048	0.00283722	0.0816822	UP
Slc17a5	-0.647377	0.00287205	0.0825241	DOWN
Pars2	-0.637899	0.00289063	0.0828964	DOWN
Slc35f6	0.368706	0.00289769	0.082938	UP
Atn1	0.4276	0.00291543	0.0832843	UP
Ndel1	0.404569	0.00293112	0.0835709	UP
Sec22c	-0.635713	0.00294405	0.0837777	DOWN
Zfp386	-0.463693	0.00295112	0.0838174	DOWN
Rdh7	2.52109	0.00299216	0.0848199	UP
Ipp	-0.422887	0.00300409	0.0849951	DOWN
Ywhaz	0.435169	0.00301356	0.0850999	UP
Fosl1	1.78754	0.00302926	0.08538	UP
BC052040	-0.957968	0.00310647	0.0873894	DOWN
Ms4a8a	1.7584	0.0031569	0.0886392	UP
Gsr	0.370096	0.00316392	0.0886678	UP
Med4	-0.239697	0.00317686	0.0888619	DOWN
Chd1	0.45005	0.0031846	0.088888	UP
Anp32e	0.260525	0.00318983	0.088888	UP
Dtd1	-0.567181	0.00321065	0.0891726	DOWN
Usp14	2.43221	0.00321212	0.0891726	UP
Orc2	-0.282489	0.00323	0.0893431	DOWN
Vcl	0.639725	0.00323036	0.0893431	UP
Itgb1	0.479428	0.00324583	0.0894454	UP
Dph5	0.56251	0.00324617	0.0894454	UP
Mtrf1	-0.430045	0.00327234	0.0899985	DOWN
Qprt	2.73172	0.00331896	0.0911109	UP
Timp1	1.38452	0.00333327	0.0913341	UP
1810037I17Rik	0.377951	0.00335456	0.0917472	UP
CN725425	-1.23275	0.00336119	0.0917586	DOWN
Tinagl1	0.825943	0.00337515	0.0919696	UP
Rassf1	0.75567	0.00339375	0.0923062	UP
Mctp2	1.09421	0.00341519	0.0926295	UP
N4bp2l2	0.405517	0.00341818	0.0926295	UP
Abca12	-0.862901	0.00344062	0.093067	DOWN
Actn1	0.704546	0.00345195	0.0932026	UP
Kpna1	0.270089	0.00349971	0.0942871	UP
Zfand4	2.67736	0.00350488	0.0942871	UP
Mapk9	-0.283318	0.00352413	0.0946011	DOWN
Zfp637	-0.419429	0.00352936	0.0946011	DOWN
F12	2.71029	0.0035661	0.0952713	UP
Hmox1	1.16835	0.00356727	0.0952713	UP
Rela	0.32194	0.00361047	0.0962509	UP
Nlrp3	1.40501	0.00364686	0.097046	UP
Tmem156	2.90268	0.00365747		UP
Spon2	-3.67512	0.00366435	0.0973361	DOWN
Eef1a1	0.359154	0.00369146	0.0978801	UP
Slc22a15	0.642074	0.00370012	0.0979337	UP
Nrf1	0.389209	0.00371113	0.0979931	UP
Acod1	3.17365	0.00371563	0.0979931	UP
Ogfod1	-0.277197	0.00373491	0.0983259	DOWN
Ppp1r14b	0.540528	0.00374748	0.0984815	UP
Hnrnpf	0.258882	0.0037638	0.0987345	UP
Spatc1	2.74024	0.00378841	0.0990716	UP
Pex2	-0.312227	0.00379006	0.0990716	DOWN
Smyd4	-0.45609	0.00384427	0.100311	DOWN
Erc2	4.41507	0.00387448	0.100921	UP
Maml1	0.387061	0.00388591	0.101041	UP
Ankrd1	1.3983	0.00389897	0.101062	UP
Ddx3x	0.46666	0.00390043	0.101062	UP
Usp28	0.680036	0.00392178	0.101437	UP
Rsf1	-0.384531	0.00393913	0.101708	DOWN
Ier5l	1.24069	0.00398151	0.102623	UP
Ifrd1	1.02673	0.00399271	0.102732	UP
Kng2	3.01776	0.00401845	0.103215	UP
Rbbp9	-0.339514	0.0040999	0.105124	DOWN
Zswim8	0.460191	0.00414437	0.105983	UP
Rbm34	0.497312	0.00414777	0.105983	UP
Nat8f2	2.52723	0.00416422	0.10622	UP
Pdlim3	0.907327	0.00417665	0.106295	UP
Lrrcc1	-0.577443	0.0041843	0.106295	DOWN
Rasip1	0.786979	0.00418876	0.106295	UP
Nolc1	0.556901	0.00421158	0.106691	UP
Ccnb1ip1	3.74222	0.00422064	0.106737	UP
Mettl25	-0.680613	0.00423124	0.106754	DOWN
Tsr1	0.470622	0.00423968	0.106754	UP
Mgarp	3.45603	0.0042412		UP
Mid1	0.679488	0.00424885	0.106754	UP
Malt1	0.457373	0.00425019	0.106754	UP
Plekho1	0.69132	0.00427064	0.107021	UP
Zfp52	0.814717	0.00427533	0.107021	UP
Rfc2	0.704032	0.00428591	0.107097	UP
Hp	0.990441	0.00429286	0.107097	UP
Phf13	0.429433	0.00431634	0.107501	UP
Nrap	0.532075	0.00432834	0.107618	UP
Txndc9	-0.244267	0.00433665	0.107644	DOWN
Xpo7	-0.267505	0.00437397	0.108388	DOWN
Mipol1	-0.551104	0.00440994	0.109096	DOWN
Il22ra1	-3.6075	0.00441908	0.109135	DOWN
Trim12c	-0.49971	0.00443182	0.109135	DOWN
Sema3f	0.882884	0.00443366	0.109135	UP
Klra2	1.61276	0.00445213	0.109407	UP
Plekho2	0.896289	0.00446998	0.109639	UP
Akap17b	-0.845161	0.00448262	0.109639	DOWN
Adh7	-2.62407	0.00449927	0.109639	DOWN
Fem1c	0.407303	0.00450724	0.109639	UP
Mterf2	-0.62871	0.00450784	0.109639	DOWN
Tmem185b	0.426328	0.0045116	0.109639	UP
Rcor3	-0.520229	0.00451355	0.109639	DOWN
Nus1	0.35648	0.00453438	0.109964	UP
Entpd3	3.85734	0.00454801		UP
Atf7ip	-0.319525	0.00457813	0.110757	DOWN
Spty2d1	0.521733	0.00458205	0.110757	UP
Pcyox1	-0.325595	0.00459552	0.110789	DOWN
Ppp1r12a	0.395742	0.00459838	0.110789	UP
Baz1a	0.632516	0.00462818	0.110962	UP
Brd2	0.336747	0.0046319	0.110962	UP
Orm1	1.98442	0.00463324	0.110962	UP
Eapp	-0.273945	0.00464131	0.110962	DOWN
Bcl7c	0.747477	0.00465135	0.110962	UP
Sh3d19	-0.501148	0.00465285	0.110962	DOWN
Tmem163	3.33174	0.00465817	0.110962	UP
Furin	0.33211	0.00468637	0.111454	UP
Ttc21b	-0.633064	0.00474254	0.112609	DOWN
Ugt1a5	3.06282	0.00479201	0.113601	UP
Bicdl1	-0.890421	0.00489319	0.115813	DOWN
Myoz1	3.0948	0.00492345	0.116315	UP
Akirin1	0.334579	0.00493013	0.116315	UP
Zfp513	0.462464	0.00494902	0.116574	UP
Tent4a	0.568775	0.00498284	0.117184	UP
Pck1	1.91191	0.0050006	0.117415	UP
Nadk	0.423703	0.00503876	0.117955	UP
Fosl2	0.772598	0.00504172	0.117955	UP
Efna5	0.823139	0.00504759	0.117955	UP
Ell	0.559595	0.00505831	0.118019	UP
Washc5	-0.319495	0.00509039	0.118477	DOWN
Fam43a	0.993061	0.00509797	0.118477	UP
Scrn3	-0.324631	0.005102	0.118477	DOWN
Ppia	1.25591	0.00518657	0.120052	UP
Il33	1.11894	0.00519794	0.120052	UP
Nat9	-0.461808	0.00520766	0.120052	DOWN
Ankmy2	-0.482463	0.00521018	0.120052	DOWN
Ugt2b36	2.37735	0.00521046	0.120052	UP
Cxcr5	3.18633	0.00521866		UP
Gtf3c3	-0.3493	0.00522743	0.120255	DOWN
Cd37	1.34066	0.00524013	0.12036	UP
Nol10	0.466985	0.00528234	0.121141	UP
Pfn1	0.436071	0.00529335	0.121205	UP
Tshz1	0.82517	0.00539202	0.123274	UP
AI182371	2.74794	0.00540679	0.12342	UP
Aaed1	-0.383391	0.00543553	0.123885	DOWN
Rexo1	0.380142	0.0054445	0.123898	UP
Tlr6	1.46323	0.0054635	0.124139	UP
Ube2f	0.268958	0.00548392	0.124403	UP
Arhgap32	0.601299	0.00549198	0.124403	UP
Sdhaf3	-0.39802	0.00550264	0.124454	DOWN
Lats1	0.335449	0.0055141	0.124522	UP
Zfp330	-0.426157	0.00556882	0.125566	DOWN
Paip1	-0.251248	0.00558647	0.125772	DOWN
Crem	0.646607	0.00560237	0.12586	UP
Tcerg1	0.366227	0.00560741	0.12586	UP
Cpb2	2.95264	0.00561701	0.125884	UP
Casp6	-0.497933	0.00563109	0.126008	DOWN
Mum1l1	2.12838	0.0056693	0.126672	UP
Atrip	-1.29388	0.00570548	0.12725	DOWN
Il4ra	1.03417	0.00571243	0.12725	UP
Fjx1	1.37344	0.0057434	0.127747	UP
Ugt1a9	3.09122	0.00576299	0.12799	UP
Uba52	-0.42742	0.00577627	0.128074	DOWN
2200002D01Rik	1.39872	0.00578892	0.128074	UP
Lamc2	1.32986	0.00580074	0.128074	UP
Cir1	-0.379531	0.00580142	0.128074	DOWN
Mgam	2.7743	0.00594045	0.130773	UP
Lrrc32	1.08157	0.00594141	0.130773	UP
Tyw1	-0.460124	0.00600234	0.131873	DOWN
Bmp2k	0.502235	0.00600925	0.131873	UP
Pak3	1.78946	0.00603401	0.132096	UP
Spop	0.197678	0.0060373	0.132096	UP
Zkscan7	-0.69303	0.00606291	0.13246	DOWN
1810032O08Rik	1.47092	0.00610439	0.13317	UP
Mblac2	-0.82157	0.00614801	0.133739	DOWN
Fgd4	-0.703794	0.00614859	0.133739	DOWN
Mtdh	0.301774	0.00616809	0.133965	UP
Dars	-0.229807	0.00618448	0.134124	DOWN
Tnrc6b	-0.341531	0.00620405	0.134314	DOWN
Slc27a5	2.4653	0.00621141	0.134314	UP
Myd88	0.465962	0.00628289	0.135511	UP
Tiparp	1.17954	0.00628511	0.135511	UP
Ccdc86	0.55782	0.00634665	0.136116	UP
Znrf1	0.346273	0.00634779	0.136116	UP
Bax	0.405309	0.006349	0.136116	UP
Zfp526	-0.654716	0.00635003	0.136116	DOWN
Ubxn2b	-0.464395	0.00638871	0.1367	DOWN
Clic1	0.546382	0.00639582	0.1367	UP
Ckap4	0.733892	0.00645746	0.137733	UP
Fam167b	-2.37435	0.00646281	0.137733	DOWN
Rdh10	0.484266	0.00647492	0.137793	UP
Prpf4	-0.335289	0.00649424	0.1379	DOWN
Fam49b	0.465704	0.00649862	0.1379	UP
Sidt2	0.315277	0.00653041	0.138289	UP
Hspa8	0.496457	0.00653571	0.138289	UP
Fstl3	1.95043	0.00657675	0.13895	UP
Hif1a	0.411363	0.00658576	0.13895	UP
Rpp30	-0.343948	0.00664168	0.13993	DOWN
Tbc1d10a	0.599221	0.00670479	0.141058	UP
Gm340	0.956253	0.00674314	0.141664	UP
Smu1	-0.277445	0.00683777	0.143448	DOWN
Myf6	2.90035	0.00685507	0.143606	UP
Glis3	1.21756	0.00686626	0.143637	UP
Ckap5	-0.302134	0.00689804	0.144098	DOWN
Trmt10a	0.564993	0.00691277	0.144132	UP
Cyp2a12	2.2296	0.0069192	0.144132	UP
Rab44	3.98019	0.00693308	0.144218	UP
Ccdc38	2.85448	0.0069526	0.144421	UP
Fgr	1.83134	0.00697637	0.144711	UP
Sgms2	1.55696	0.00702592	0.1454	UP
Clic4	0.677472	0.00702931	0.1454	UP
Psmd11	0.366853	0.00703996	0.145417	UP
Pygl	0.688947	0.00707127	0.14586	UP
Nes	1.01385	0.00708626	0.145965	UP
Rbp4	1.46924	0.00721039	0.148252	UP
Ezh1	-0.387323	0.00721737	0.148252	DOWN
Vps39	-0.327663	0.00722863	0.148277	DOWN
Scml4	2.18814	0.00725302	0.148328	UP
S100a11	0.706741	0.00725379	0.148328	UP
Cflar	0.422766	0.00726124	0.148328	UP
Cxcl3	2.9007	0.0073815	0.150576	UP
Vasn	0.858336	0.00742291	0.150942	UP
Acsl4	0.581525	0.00742582	0.150942	UP
Zfp229	-0.555687	0.00743008	0.150942	DOWN
Zfp867	-0.388873	0.00745495	0.151239	DOWN
Zfp825	-0.517803	0.00748644	0.15167	DOWN
Anxa7	0.351488	0.00752186	0.152179	UP
Usp36	0.450366	0.00753527	0.152241	UP
Mbl2	2.6584	0.00757414	0.152669	UP
Dcun1d3	0.636668	0.00758272	0.152669	UP
Plgrkt	-0.417712	0.00758743	0.152669	DOWN
Hspa1l	0.481495	0.0076081	0.152805	UP
Jun	0.907676	0.00761488	0.152805	UP
Sema4c	0.931177	0.00764907	0.153282	UP
Marcksl1	1.39365	0.00768851	0.153864	UP
Zkscan4	-1.19577	0.0077495	0.154875	DOWN
Trib1	0.830243	0.00778519	0.155378	UP
Aloxe3	3.59396	0.00778627		UP
Bcor	0.446272	0.00789582	0.156815	UP
Cyth3	0.510815	0.00790145	0.156815	UP
Ppbp	1.36547	0.00792016	0.156815	UP
Irs2	0.855961	0.00792066	0.156815	UP
Pbx1	-0.37568	0.00793414	0.156815	DOWN
Olfml1	-0.935265	0.00793577	0.156815	DOWN
Tmem220	-0.731204	0.00794192	0.156815	DOWN
Naip2	0.737961	0.00794215	0.156815	UP
Pold3	-0.499714	0.00795388	0.156837	DOWN
Plk3	1.80466	0.00801463	0.157824	UP
Apoc1	1.76352	0.00804884	0.158287	UP
Twist2	1.8479	0.00815039	0.160071	UP
Frmd6	0.540998	0.00819882	0.160635	UP
Slc15a3	1.12458	0.0082009	0.160635	UP
Peli3	-0.913942	0.00822742	0.160915	DOWN
Slain2	0.282286	0.00825106	0.160915	UP
1110008L16Rik	-0.406113	0.00826042	0.160915	DOWN
Spred3	1.23903	0.00826919	0.160915	UP
Nfkbid	2.62194	0.00826964	0.160915	UP
Kif18a	-0.944894	0.00830109	0.161155	DOWN
Ada	1.35681	0.00830381	0.161155	UP
Gm14443	-0.476338	0.0083223	0.161233	DOWN
Slc20a1	0.923534	0.00832968	0.161233	UP
Kti12	0.407822	0.00837144	0.16183	UP
Osmr	0.655009	0.00840746	0.162313	UP
2810004N23Rik	-0.259416	0.0084275	0.162488	DOWN
Zfyve21	-0.488839	0.00847505	0.163192	DOWN
Pomc	-2.35007	0.00851306	0.16371	DOWN
Itga2	1.96724	0.00857024	0.164595	UP
Rrp8	0.410701	0.00861478	0.165236	UP
Wfdc17	1.07402	0.00867856	0.166043	UP
Supt3	-0.522738	0.00868946	0.166043	DOWN
Als2	-0.432224	0.00869181	0.166043	DOWN
Dapp1	0.662449	0.00870185	0.166043	UP
Car13	1.2655	0.00874111	0.166577	UP
Cacng1	2.48144	0.00877018	0.166844	UP
Cdc42se1	0.47358	0.00877772	0.166844	UP
Hexim2	-0.776728	0.00879001	0.166863	DOWN
Rpusd1	-0.595267	0.00881021	0.167032	DOWN
Nt5c3	-0.430838	0.00883586	0.167173	DOWN
Casp8ap2	-0.322159	0.00885774	0.167173	DOWN
Olfr243	2.89628	0.0088578	0.167173	UP
Klf6	0.876359	0.00886291	0.167173	UP
Ambp	2.34523	0.00887717	0.167228	UP
Epg5	-0.255719	0.00890516	0.16723	DOWN
Heatr1	0.670481	0.00890589	0.16723	UP
Zfp799	-0.475487	0.00891778	0.16723	DOWN
Sh3bp5l	0.419027	0.00892254	0.16723	UP
Sema4a	2.24902	0.00894475	0.167433	UP
Llph	0.500509	0.00896595	0.167512	UP
Eya3	-0.263865	0.00898409	0.167512	DOWN
Vps33a	-0.279088	0.0089886	0.167512	DOWN
Slc23a2	0.640203	0.00900323	0.167512	UP
Mad2l1	-0.820535	0.00900566	0.167512	DOWN
Nif3l1	-0.401586	0.00902364	0.167612	DOWN
Tmem106b	-0.337409	0.00904101	0.167612	DOWN
Nfe2l2	0.428226	0.0090451	0.167612	UP
Zranb3	-0.64601	0.00905903	0.16766	DOWN
Trim37	-0.312117	0.009071	0.167672	DOWN
Map2k4	0.337224	0.00908724	0.167762	UP
Vps53	-0.326573	0.00914308	0.168582	DOWN
Mrpl44	-0.254396	0.0091805	0.169061	DOWN
Lgals3	1.0135	0.0092201	0.169579	UP
C330018D20Rik	-0.423568	0.00925973	0.170096	DOWN
Syt12	0.836547	0.00931061	0.170818	UP
Frmd4a	0.635399	0.00932236	0.170821	UP
Rab22a	-0.224438	0.00938457	0.171748	DOWN
Adpgk	0.585979	0.00941379	0.17207	UP
Dnah17	1.54118	0.00947745	0.173019	UP
Nat8f4	-1.11465	0.00955504	0.17422	DOWN
Nkd2	1.11948	0.00964664	0.175674	UP
Gpn3	-0.354396	0.0096713	0.175906	DOWN
Slf1	-0.39741	0.00969232	0.176071	DOWN
Pdpk1	0.33956	0.00970479	0.176081	UP
Tbx15	1.03761	0.00973376	0.176342	UP
Nrg4	-2.74693	0.00974305	0.176342	DOWN
Gm3604	-1.04652	0.00978605	0.176903	DOWN
Trmt5	-0.438627	0.00988146	0.17841	DOWN
Sde2	0.30302	0.00991872	0.178779	UP
Rnf135	-0.588799	0.00994257	0.178779	DOWN
Pnmal2	-0.999667	0.00994553	0.178779	DOWN
Abcg5	3.11922	0.00995143	0.178779	UP
Crebrf	-0.480224	0.00996244	0.178779	DOWN
Stat3	0.42595	0.00999236	0.178846	UP
Plxna2	0.716814	0.0100005	0.178846	UP
Zkscan5	0.314089	0.0100025	0.178846	UP
Lrrc8a	0.597459	0.0100366	0.179086	UP
Nab2	1.07293	0.0100402	0.179086	UP
Sf3b1	0.3552	0.0100536	0.179109	UP
Gem	0.989663	0.0100756	0.179285	UP
Bcat1	1.16854	0.0101106	0.179692	UP
Cnnm4	0.730182	0.0101391	0.179982	UP
1700030K09Rik	-0.485457	0.0101835	0.180553	DOWN
Tyms	0.905466	0.0102363	0.181218	UP
Lrrc8d	0.606225	0.0102456	0.181218	UP
Sec24a	0.419994	0.0102769	0.181554	UP
D130040H23Rik	-2.49121	0.0103145		DOWN
Oit3	2.60588	0.0104441	0.184288	UP
Taco1	-0.290129	0.0104602	0.184352	DOWN
Etf1	0.229627	0.0104911	0.184676	UP
Dnaja1	0.54209	0.0105188	0.184864	UP
Neto2	1.22075	0.0105355	0.184864	UP
Cttn	0.297701	0.010555	0.184864	UP
Baalc	1.22532	0.0105619	0.184864	UP
Brd4	0.3931	0.0105661	0.184864	UP
Rbm12	0.53759	0.01058	0.184864	UP
Lpcat4	1.3259	0.0105894	0.184864	UP
Dnttip2	0.34682	0.010618	0.185144	UP
Zfp266	-0.318501	0.0106395	0.185144	DOWN
Plekha1	0.545855	0.0106431	0.185144	UP
Mfsd4b4	-0.493624	0.0107955	0.187575	DOWN
Map4k3	4.19814	0.0108466	0.188241	UP
Pot1a	-0.415562	0.0108613	0.188276	DOWN
Sema4g	2.66892	0.0108995	0.188313	UP
Qtrt1	0.743422	0.0108996	0.188313	UP
Pcnx4	-0.46769	0.0109017	0.188313	DOWN
Sumo2	-0.209848	0.0109544	0.189002	DOWN
Zfp759	-0.558714	0.0109889	0.189376	DOWN
Map3k14	0.60753	0.0110696	0.1904	UP
Tnfrsf10b	0.835275	0.0110741	0.1904	UP
Plb1	2.9027	0.0110858		UP
Slc7a11	3.13465	0.0111255	0.191061	UP
Srsf2	0.433235	0.0111565	0.191264	UP
Ugt2b1	2.75165	0.011186	0.191264	UP
Dph1	0.527598	0.011195	0.191264	UP
Cry1	0.510538	0.0112103	0.191264	UP
Cbl	0.371651	0.0112273	0.191264	UP
Zfp90	-1.22359	0.011237	0.191264	DOWN
Syncrip	0.320524	0.0112384	0.191264	UP
Tbc1d32	-0.597314	0.0112409	0.191264	DOWN
Taf5l	0.32348	0.0112925	0.19164	UP
Cmip	0.507585	0.0112941	0.19164	UP
Casp8	0.531649	0.0113227	0.19164	UP
Ctbp2	0.374694	0.0113272	0.19164	UP
Pik3ip1	-0.871643	0.0113309	0.19164	DOWN
Mob3a	0.741217	0.0113409	0.19164	UP
Fbxo32	-0.577261	0.0113643	0.191817	DOWN
Ces3a	2.76516	0.0113991	0.192185	UP
Adam9	0.329768	0.0114356	0.19258	UP
Ptafr	1.26991	0.0115096	0.193297	UP
Gnb1	0.224357	0.0115208	0.193297	UP
Gna13	0.340302	0.0115299	0.193297	UP
Alg6	-0.572356	0.0115306	0.193297	DOWN
Xpc	-0.420541	0.0115825	0.193948	DOWN
Bcr	0.587394	0.0116134	0.194245	UP
Saa4	2.51144	0.0116345	0.194378	UP
AW146154	-0.735586	0.0116527	0.194454	DOWN
Zfp870	-5.2504	0.0116654	0.194454	DOWN
Foxf1	1.52685	0.011709	0.194855	UP
Lnx2	0.586178	0.0117205	0.194855	UP
Apob	1.82717	0.011729	0.194855	UP
Lrsam1	-0.502847	0.0118158	0.196075	DOWN
Ficd	-0.471261	0.0118382	0.196227	DOWN
Pus7	0.319192	0.0119287	0.197505	UP
Tnfrsf26	1.10161	0.0119665	0.19791	UP
Pak2	0.26069	0.0120189	0.198459	UP
5730409E04Rik	-0.393129	0.0120266	0.198459	DOWN
Cstb	0.396254	0.0121055	0.199538	UP
Polr2b	-0.172797	0.0121994	0.200862	DOWN
Hbp1	-0.258863	0.0122241	0.200927	DOWN
Arf2	0.5178	0.0122305	0.200927	UP
Slc39a10	0.827779	0.0123048	0.201921	UP
Sele	1.7478	0.0123204	0.201954	UP
2610301B20Rik	-0.378954	0.0123477	0.202176	DOWN
Trpv2	1.14358	0.0123911	0.202663	UP
Fxyd5	0.898036	0.0124266	0.202916	UP
Adora2b	1.06498	0.012435	0.202916	UP
Lgr6	-0.399917	0.0124478	0.202916	DOWN
Gar1	0.502178	0.0125253	0.203735	UP
Glt1d1	-2.26304	0.0125346	0.203735	DOWN
Ube2d3	0.260852	0.012551	0.203735	UP
Rgs16	1.66733	0.0125532	0.203735	UP
Smc3	-0.230347	0.0126428	0.204963	DOWN
Gm49336	0.400581	0.0126597	0.205013	UP
Cfl2	0.366444	0.0126951	0.205361	UP
Tent5a	0.725662	0.0127247	0.205614	UP
Vegfd	-0.925619	0.0128159	0.206597	DOWN
Ptcd2	-0.360763	0.0128183	0.206597	DOWN
Fat2	-15.8627	0.0128186		DOWN
Lrp8	1.75488	0.0128399	0.206597	UP
Sptlc2	0.429452	0.0128415	0.206597	UP
Tspyl5	-0.599513	0.012862	0.206702	DOWN
Tada2a	-0.478158	0.0129493	0.207861	DOWN
Gjb2	2.71946	0.0129623	0.207861	UP
Narf	-0.382814	0.0130678	0.209325	DOWN
Ebag9	-0.26188	0.0130971	0.209474	DOWN
Tmem231	5.47368	0.0131054	0.209474	UP
Cd22	2.933	0.0131335	0.209697	UP
Lrfn3	-1.22751	0.0131956	0.210293	DOWN
Igbp1	-0.248884	0.0131998	0.210293	DOWN
Apoc3	2.4916	0.0132136	0.210293	UP
Ift88	-0.553834	0.0132512	0.210664	DOWN
Fam114a2	-0.215009	0.0133846	0.212556	DOWN
Tmem177	-0.449499	0.0135321	0.214342	DOWN
Kctd3	0.386698	0.0135324	0.214342	UP
Cyp2c50	2.11962	0.0135406	0.214342	UP
Thnsl1	-0.497573	0.0135677	0.214541	DOWN
Rcl1	0.671314	0.0137181	0.216687	UP
Prr11	-1.13226	0.0137399	0.216737	DOWN
Ppp5c	-0.185854	0.0137612	0.216737	DOWN
Cab39	0.326497	0.0137653	0.216737	UP
Magi3	0.398569	0.0138331	0.217572	UP
Scn4b	-0.514101	0.0138502	0.21761	DOWN
Arsj	1.24016	0.0138925	0.218042	UP
Tubd1	-0.491095	0.0139376	0.218468	DOWN
Pdp2	-0.59418	0.0139492	0.218468	DOWN
Ctnnd1	0.305713	0.0139912	0.218793	UP
Mak16	0.377243	0.0139995	0.218793	UP
Jaml	1.88287	0.0140146	0.218797	UP
Hist3h2a	-0.782234	0.0140404	0.218968	DOWN
Map10	-0.529431	0.0141146	0.219892	DOWN
Mkrn2	-0.248126	0.0141957	0.220746	DOWN
Ubr2	-0.339345	0.0141992	0.220746	DOWN
Tfpt	-0.476452	0.0142958	0.222013	DOWN
Ttc4	-0.280836	0.0143587	0.222756	DOWN
Nudt2	-0.356753	0.0143847	0.222924	DOWN
Shld1	-0.675557	0.0144031	0.222976	DOWN
Sln	2.36354	0.0144879	0.223903	UP
Itgal	1.07551	0.0144933	0.223903	UP
Galm	-0.549692	0.0145909	0.225175	DOWN
Mks1	-0.660387	0.0146195	0.225381	DOWN
Rpa3	-0.569563	0.0146505	0.225624	DOWN
Tomm22	-2.42547	0.0147118	0.226332	DOWN
Fam169b	2.2398	0.0147649	0.226912	UP
Arhgap1	0.298958	0.0148195	0.227514	UP
Sh2d5	2.70174	0.0148474	0.227707	UP
Gprc5b	0.723363	0.0149773	0.229292	UP
Zfp318	-0.650974	0.0149917	0.229292	DOWN
Nob1	0.412654	0.0150047	0.229292	UP
Tpm3-rs7	2.23052	0.0150129	0.229292	UP
Hmga2	2.75603	0.0150425	0.229483	UP
Rtraf	-0.237972	0.0150565	0.229483	DOWN
Prss23	0.771174	0.0150905	0.229765	UP
Nop2	0.38338	0.0151146	0.229894	UP
Trit1	0.903243	0.0152647	0.231939	UP
Pnp	0.471726	0.0153378	0.232696	UP
Micall2	1.28906	0.0153461	0.232696	UP
D1Ertd622e	0.592542	0.015416	0.233484	UP
Zfp747	0.587797	0.0154297	0.233484	UP
Apc2	-0.886457	0.0154861	0.234099	DOWN
Nkiras1	-0.503613	0.0155256	0.234269	DOWN
Cxcr6	1.8145	0.0155291	0.234269	UP
Fam104a	0.312385	0.0155479	0.234313	UP
Nkrf	0.448475	0.015657	0.235717	UP
Trim12a	-0.460147	0.0158147	0.237849	DOWN
Dnaja4	0.655896	0.0158981	0.23886	UP
Rtf1	-0.203895	0.0159162	0.238889	DOWN
Dhx33	0.391649	0.0159385	0.23898	UP
Zfp273	-0.87728	0.0159796	0.239353	DOWN
Slc2a6	2.54329	0.0160105	0.239573	UP
Hal	2.56383	0.016064	0.240131	UP
Mrto4	0.347801	0.0161608	0.241311	UP
Btaf1	0.356193	0.0161756	0.241311	UP
Crtac1	-3.15893	0.0161923	0.241316	DOWN
Proz	1.18666	0.0162146	0.241405	UP
Areg	4.98733	0.0162327		UP
Mrpl47	-0.312931	0.0162395	0.241532	DOWN
Hcst	2.86947	0.0162968		UP
Mfn1	-0.181046	0.0163065	0.242285	DOWN
Fmo3	3.48702	0.0164306	0.243884	UP
Znhit3	-0.384407	0.0164493	0.243915	DOWN
Olr1	2.05941	0.0165331	0.244912	UP
Gpsm1	-0.30489	0.0165715	0.245041	DOWN
Myc	1.2979	0.016575	0.245041	UP
Tstd3	-0.457447	0.0166338	0.245664	DOWN
Zfp346	-0.420115	0.0167053	0.246475	DOWN
Pithd1	-0.3403	0.0167829	0.247372	DOWN
Spred1	0.552336	0.0168176	0.247614	UP
Pdcd7	0.3852	0.0168328	0.247614	UP
Sec22a	-0.335299	0.0168537	0.247674	DOWN
Slc4a1ap	-0.262759	0.0169588	0.24897	DOWN
Ube2e3	-0.242132	0.0169998	0.249324	DOWN
Hectd3	-0.280395	0.0170303	0.249479	DOWN
Tmem173	0.714148	0.0170441	0.249479	UP
Anxa2	0.877429	0.0171178	0.25031	UP
Pacs1	-0.346228	0.0171626	0.250492	DOWN
Sec24b	0.390416	0.0171858	0.250492	UP
Trim16	1.05665	0.0171961	0.250492	UP
B4galt5	0.668999	0.0171981	0.250492	UP
1810055G02Rik	0.747816	0.0172362	0.250799	UP
Rhoa	0.242549	0.0172814	0.251209	UP
Stxbp2	0.7025	0.0174163	0.252922	UP
Cilp2	2.15175	0.0174677	0.253419	UP
Cyp2a5	3.06697	0.0175208	0.253783	UP
Pex1	-0.38101	0.0175272	0.253783	DOWN
Bdkrb2	1.42323	0.0175746	0.25422	UP
Usp37	0.385563	0.0176127	0.25424	UP
Klhl33	-0.827036	0.017616	0.25424	DOWN
Rmi2	1.4763	0.0176594	0.25424	UP
Acsm1	2.50159	0.0176668	0.25424	UP
Wipi2	-0.175478	0.0176867	0.25424	DOWN
Rps11	0.239806	0.0176891	0.25424	UP
Olfr667	1.35243	0.0176965	0.25424	UP
Tead4	1.02898	0.0177239	0.254386	UP
Dtd2	-0.435687	0.0177554	0.254492	DOWN
Sytl1	2.87788	0.0177657	0.254492	UP
Zfp688	1.99022	0.0178346	0.255232	UP
Faf2	0.2313	0.017867	0.255448	UP
Psme3	0.176113	0.0178881	0.255502	UP
Bhmt2	2.38826	0.0179173	0.255672	UP
Phactr4	0.297886	0.0179387	0.25573	UP
Ccnt1	0.270811	0.0180534	0.257117	UP
Hdac8	-0.499273	0.0180855	0.257326	DOWN
Rps19	0.395007	0.0181764	0.258303	UP
Ccdc51	-0.405832	0.0181891	0.258303	DOWN
Bag2	0.551009	0.0183191	0.259562	UP
Aldh1a3	0.989678	0.0183459	0.259562	UP
Cep97	-0.612884	0.018346	0.259562	DOWN
Tekt2	2.54008	0.018348	0.259562	UP
Fnip1	-0.352463	0.0183694	0.259616	DOWN
Ifitm5	2.29866	0.0184257	0.260035	UP
Usp15	-0.327976	0.0184343	0.260035	DOWN
Mtrex	-0.192301	0.0185352	0.261208	DOWN
Cyp4f18	1.39249	0.0185857	0.261555	UP
Ap5z1	-0.526686	0.0186805	0.261555	DOWN
Reep3	0.299047	0.0187002	0.261555	UP
Uchl5	-0.349255	0.0187234	0.261555	DOWN
Senp7	-0.49291	0.0187344	0.261555	DOWN
Pon1	1.68208	0.0187523	0.261555	UP
Cnga3	-0.797713	0.0187648	0.261555	DOWN
Elac2	0.387426	0.0187875	0.261555	UP
Cd300lb	1.5017	0.0187901	0.261555	UP
Coa4	-0.508033	0.0187932	0.261555	DOWN
Cpsf3	-0.228557	0.018807	0.261555	DOWN
Vps26c	-0.296897	0.0188306	0.261555	DOWN
Bcl2a1b	1.58888	0.018832	0.261555	UP
Fgf10	-1.26722	0.0188397	0.261555	DOWN
Pttg1ip	0.274373	0.0188499	0.261555	UP
Kif11	1.07539	0.0188729	0.261555	UP
Rhpn2	-0.762429	0.0188885	0.261555	DOWN
Shisa5	0.401889	0.0188959	0.261555	UP
Zfp667	-0.58802	0.0188963	0.261555	DOWN
Mat2b	-0.277092	0.0189144	0.261561	DOWN
Olfr887	1.16002	0.0189563	0.261699	UP
Rab5c	0.242343	0.018977	0.261699	UP
Gm9949	2.48757	0.0189776	0.261699	UP
Pitx3	1.77202	0.0190179	0.262011	UP
Fetub	3.38569	0.01905	0.262209	UP
Syt11	-0.401648	0.0190971	0.262368	DOWN
Chst1	0.93057	0.019107	0.262368	UP
Smyd5	0.554429	0.0191149	0.262368	UP
Rab21	-0.152114	0.0191397	0.262451	DOWN
Rin1	0.952978	0.0191771	0.262451	UP
Rhobtb2	-0.537874	0.0191917	0.262451	DOWN
Xbp1	0.415486	0.0191921	0.262451	UP
Bysl	0.383688	0.0192835	0.263458	UP
Shoc2	0.266662	0.0193167	0.263667	UP
Ing3	0.453013	0.0194025	0.264595	UP
Pde8b	-0.758249	0.0194444	0.264649	DOWN
Gimap3	1.37338	0.0194508	0.264649	UP
Tulp2	2.86577	0.0194777		UP
Crhr2	-0.535904	0.0194801	0.264649	DOWN
Cd177	2.88058	0.0194955	0.264649	UP
Flvcr2	-0.926945	0.0195103	0.264649	DOWN
Arhgap23	0.616546	0.019514	0.264649	UP
Snai1	0.982778	0.0195345	0.264684	UP
Nfe2	1.78313	0.0195663	0.264871	UP
Sugt1	-0.228808	0.0196247	0.265418	DOWN
Stum	-0.899106	0.01965	0.265518	DOWN
Sugp1	-0.267891	0.019708	0.266058	DOWN
Mtif3	-0.355386	0.019806	0.266952	DOWN
Tat	2.28221	0.0198104	0.266952	UP
Tnfrsf1a	0.36595	0.0198675	0.267478	UP
Ctla2b	1.21204	0.0198884	0.267515	UP
Xrn1	-0.274725	0.0199228	0.267734	DOWN
Zfp975	-0.457771	0.0200886	0.269717	DOWN
E2f4	0.345783	0.0201374	0.270126	UP
Kcnj2	-0.571153	0.0202427	0.271273	DOWN
Vldlr	-0.348643	0.0202596	0.271273	DOWN
Cd53	0.76928	0.0203393	0.272093	UP
Btbd3	-0.413095	0.0203611	0.272138	DOWN
Depdc5	-0.44411	0.0204074	0.272401	DOWN
Ak3	-0.32346	0.0204268	0.272401	DOWN
Inhbb	1.20696	0.020436	0.272401	UP
Hnrnpa0	0.31714	0.0204696	0.272478	UP
Fam172a	-0.319244	0.0204787	0.272478	DOWN
Kansl2	0.358972	0.0205341	0.272845	UP
Ccdc24	2.77034	0.0205433	0.272845	UP
Sfxn3	0.607939	0.0205898	0.273217	UP
Patl1	0.280732	0.0206269	0.273463	UP
Topbp1	-0.26694	0.0206548	0.273588	DOWN
Tmem86b	0.771793	0.0206991	0.273929	UP
Hnf4a	2.96987	0.0207213	0.273977	UP
Eid2b	-0.368301	0.0207411	0.273994	DOWN
Zfp30	-0.564269	0.0207759	0.274155	DOWN
Gng7	-1.13548	0.0207904	0.274155	DOWN
Chaf1b	1.89074	0.0208188	0.274285	UP
Zfp182	-0.507595	0.0208796	0.27484	DOWN
Enox2	-0.433365	0.0209134	0.27503	DOWN
Crlf2	0.760602	0.0209317	0.27503	UP
Top1mt	-0.430782	0.0209516	0.27503	DOWN
Ciao1	-0.233801	0.0209685	0.27503	DOWN
Rhoj	0.62555	0.0210554	0.275924	UP
Scaper	-0.340684	0.0210918	0.276156	DOWN
Stat4	2.58095	0.0211308		UP
Srp54a	-0.324404	0.0211482	0.27665	DOWN
Yap1	0.252003	0.0212035	0.276959	UP
Nono	-0.177125	0.0212093	0.276959	DOWN
Procr	1.21116	0.0212577	0.277346	UP
Prodh	-1.19259	0.0212792	0.27738	DOWN
Tigar	-0.346646	0.0213451	0.277979	DOWN
Atp6v1b2	0.242868	0.0213671	0.277979	UP
Apoh	1.44643	0.0213982	0.277979	UP
Pck2	-0.717273	0.0214077	0.277979	DOWN
Cebpd	0.866359	0.0214192	0.277979	UP
Itgam	1.04375	0.0215097	0.278299	UP
Zfp780b	-0.351844	0.021568	0.278299	DOWN
Tmem251	0.390433	0.02158	0.278299	UP
5730455P16Rik	-0.247403	0.0216203	0.278299	DOWN
Ankrd26	-0.637038	0.0216218	0.278299	DOWN
Zfp706	-0.212312	0.0216228	0.278299	DOWN
Zfp97	-0.593554	0.021625	0.278299	DOWN
Azgp1	5.14561	0.021631	0.278299	UP
Ppfibp2	-0.70193	0.0216343	0.278299	DOWN
Letm2	-0.7095	0.0216416	0.278299	DOWN
Vash2	1.94482	0.0216511	0.278299	UP
Ubqln2	-0.239314	0.0217085	0.278567	DOWN
Rara	0.711382	0.0217097	0.278567	UP
Nsun6	-0.499463	0.0217725	0.279072	DOWN
Tfdp2	-0.40195	0.0217868	0.279072	DOWN
Ptpn1	0.456717	0.0218177	0.27913	UP
Supt4a	-0.323147	0.0218291	0.27913	DOWN
Glp2r	2.95207	0.0218755	0.279481	UP
Rps6ka3	0.334928	0.0219162	0.279532	UP
Srm	0.540241	0.0219242	0.279532	UP
Rnh1	0.340762	0.021974	0.279532	UP
Cc2d2a	-0.483306	0.0219998	0.279532	DOWN
Mamld1	0.525632	0.0220042	0.279532	UP
Hes1	0.699685	0.0220268	0.279532	UP
Srbd1	-0.431045	0.0220289	0.279532	DOWN
Resf1	0.530022	0.022031	0.279532	UP
Optn	-0.364933	0.0221025	0.280199	DOWN
Alcam	0.634152	0.0221523	0.280454	UP
AB124611	1.05131	0.0221606	0.280454	UP
Gm3667	3.92761	0.0221856		UP
Angpt2	0.942699	0.0222011	0.280726	UP
Gfpt2	0.855727	0.0223356	0.282185	UP
Cep95	-0.434807	0.022369	0.282366	DOWN
Mup11	2.34571	0.0224185	0.282749	UP
Nat14	-0.75462	0.0224864	0.283164	DOWN
Clip2	0.710202	0.022519	0.283164	UP
Gmeb1	0.372899	0.0225363	0.283164	UP
Tlr13	0.995006	0.0225537	0.283164	UP
Dennd4a	0.670602	0.0225631	0.283164	UP
Golph3l	-0.395894	0.0225665	0.283164	DOWN
Decr2	-0.424562	0.0226476	0.283217	DOWN
Tmem86a	-0.592135	0.0226523	0.283217	DOWN
Pak6	1.1492	0.0226677	0.283217	UP
Txnl4b	-0.499405	0.0226736	0.283217	DOWN
Alx4	-1.6225	0.0226872	0.283217	DOWN
2210407C18Rik	0.546936	0.0227023	0.283217	UP
Snx2	-0.244836	0.0227049	0.283217	DOWN
Rnf44	0.207497	0.0227439	0.283464	UP
Terf2ip	-0.218713	0.0228013	0.283919	DOWN
Gemin2	-0.396974	0.0228189	0.283919	DOWN
Mcm3	0.560204	0.0228585	0.283991	UP
Fra10ac1	-0.350123	0.0228631	0.283991	DOWN
Btbd8	-0.672186	0.022909	0.284194	DOWN
Tifa	0.778716	0.022947	0.284194	UP
Ncapd2	-0.465837	0.0229656	0.284194	DOWN
Exosc2	0.293193	0.0229673	0.284194	UP
Zdhhc6	-0.249272	0.0230286	0.284194	DOWN
Tsen2	-0.428824	0.023048	0.284194	DOWN
S1pr3	0.727969	0.0230498	0.284194	UP
Lcat	0.826809	0.0230627	0.284194	UP
Mterf4	-0.414875	0.0230859	0.284194	DOWN
Apof	1.8001	0.0230902	0.284194	UP
Zbtb38	0.334054	0.0230977	0.284194	UP
Tfam	-0.235945	0.0231104	0.284194	DOWN
Sclt1	1.43302	0.0231354	0.284265	UP
Ufsp2	-0.27043	0.02317	0.284335	DOWN
Tbc1d5	-0.285942	0.0232049	0.284335	DOWN
Prorsd1	-0.294814	0.0232129	0.284335	DOWN
Prox1	-0.47939	0.0232312	0.284335	DOWN
Gm10604	-1.12338	0.0232547	0.284335	DOWN
Zfp874b	-0.49724	0.0233009	0.284335	DOWN
Snrnp200	-0.28221	0.0233176	0.284335	DOWN
Zc3h11a	0.238294	0.0233375	0.284335	UP
Pex12	-0.348974	0.0233502	0.284335	DOWN
Mcph1	-0.534468	0.0233512	0.284335	DOWN
Zfp952	-0.451263	0.0233576	0.284335	DOWN
Arg2	2.50761	0.0234047	0.284335	UP
Prkx	0.311977	0.0234053	0.284335	UP
AI464131	-0.750815	0.0234106	0.284335	DOWN
Mfap1b	-0.226176	0.0235208	0.285262	DOWN
Mrpl40	-0.395786	0.0235256	0.285262	DOWN
Olfr31	0.949778	0.0237023	0.286995	UP
Enpp4	-0.263469	0.0237073	0.286995	DOWN
Spata7	-0.4597	0.0238498	0.288252	DOWN
Rabgef1	0.355935	0.0238623	0.288252	UP
Jkamp	-0.302101	0.0238736	0.288252	DOWN
Zfp668	-0.511434	0.0239077	0.288252	DOWN
Tgfbr1	0.423719	0.0239088	0.288252	UP
Mllt10	-0.265243	0.0239484	0.288494	DOWN
Fbxo30	0.340074	0.0240485	0.289464	UP
Qser1	-0.271406	0.0240993	0.289839	DOWN
Ubb	0.308646	0.0241813	0.290589	UP
Cyp2c29	2.38934	0.0243117	0.291701	UP
Foxn2	0.31734	0.0243134	0.291701	UP
Xylt1	0.903671	0.024476	0.293414	UP
Fras1	1.70441	0.0246975	0.295683	UP
Rhoh	1.06652	0.0247165	0.295683	UP
Lsm14b	-0.246486	0.0247253	0.295683	DOWN
Prr7	2.19576	0.0247419		UP
4931406B18Rik	2.58772	0.0247712		UP
Exoc3	-0.218445	0.0247927	0.296064	DOWN
Gla	0.674235	0.0248015	0.296064	UP
Prkra	-0.40222	0.0248173	0.296064	DOWN
Myl7	1.8552	0.0248725	0.296482	UP
Tspan4	0.552863	0.0250197	0.29764	UP
Fgf23	2.72524	0.0250482	0.29764	UP
Pigv	-0.411702	0.0250612	0.29764	DOWN
Lmln	-0.62157	0.025066	0.29764	DOWN
Hps4	-0.518061	0.0250704	0.29764	DOWN
Pdlim7	0.612363	0.0251449	0.298101	UP
Itga3	0.750325	0.0251496	0.298101	UP
Rlim	0.334877	0.0251973	0.298427	UP
Rad54l2	0.432055	0.025227	0.29854	UP
Rpl27	0.64416	0.025256	0.298587	UP
Tcta	-0.426518	0.0252714	0.298587	DOWN
Mtmr4	-0.372676	0.0253685	0.299434	DOWN
Bco1	2.13157	0.0253837	0.299434	UP
Sars2	-0.391994	0.0254151	0.299496	DOWN
Foxc2	1.08755	0.0254413	0.299496	UP
Exoc6	-0.289618	0.0254498	0.299496	DOWN
Crybb3	2.12772	0.025472	0.299519	UP
Asrgl1	-0.25018	0.0255288	0.299949	DOWN
Ms4a4b	2.37855	0.0255754		UP
Coro1a	0.790538	0.0256349	0.300891	UP
Tfr2	2.254	0.0256498	0.300891	UP
Trim30d	0.641711	0.0256725	0.300919	UP
Pabpc1l	2.76748	0.0257022	0.301027	UP
Wdr53	-0.384686	0.0257498	0.301259	DOWN
Zfp617	-0.285946	0.0257628	0.301259	DOWN
Tyrobp	0.745059	0.0257907	0.301347	UP
Jund	0.562505	0.0258123	0.301361	UP
Tlr2	0.843736	0.0258827	0.301794	UP
Elf4	0.728	0.0258903	0.301794	UP
Ugcg	0.45122	0.0259844	0.302653	UP
Adm	0.926421	0.0260282	0.302924	UP
Vcam1	0.752528	0.0261708	0.304344	UP
Mmp19	0.839243	0.0262265	0.304562	UP
Rbm43	-0.463561	0.0262308	0.304562	DOWN
Ext1	0.415425	0.0262536	0.304587	UP
Ptpn23	0.367166	0.0263105	0.304942	UP
Rac1	0.200601	0.0263254	0.304942	UP
Smad9	-1.13095	0.026356	0.305025	DOWN
Commd5	-0.425548	0.0263929	0.305025	DOWN
Popdc3	0.310069	0.0263946	0.305025	UP
Ccnt2	-0.384659	0.0264616	0.30556	DOWN
Nop16	0.343402	0.0264895	0.305643	UP
S100a16	0.350895	0.0265497	0.306014	UP
Stac3	1.63569	0.026563	0.306014	UP
Zfp934	-0.710632	0.0266325	0.306575	DOWN
Cenpq	-0.453043	0.0266619	0.306674	DOWN
Mup14	2.7322	0.0267023	0.306899	UP
Drosha	-0.261452	0.0267377	0.307068	DOWN
Slco1b2	2.26269	0.0267912	0.307443	UP
Zeb1	-2.15139	0.0268175	0.307505	DOWN
Zc3h6	-0.583709	0.026954	0.308832	DOWN
Rell1	2.16833	0.0270553	0.309752	UP
Ptma	0.287015	0.0270838	0.309838	UP
Tgfb1i1	0.766636	0.0271079	0.309874	UP
Plpp2	1.41524	0.0271345	0.309938	UP
Zfp106	-0.201912	0.0271719	0.309946	DOWN
Carmil2	2.9325	0.0271744		UP
Dand5	-0.416334	0.0271772	0.309946	DOWN
Lpcat2	2.09973	0.0272059	0.309969	UP
Il1rap	0.385205	0.0272212	0.309969	UP
Jak2	0.297988	0.0274464	0.312236	UP
Pde7a	-0.470862	0.0274626	0.312236	DOWN
Myo1h	2.21237	0.0275158		UP
Atp6v1h	0.316221	0.0275534	0.313028	UP
Pcmtd2	-0.392227	0.0276514	0.3139	DOWN
Ccng2	-0.433055	0.0277102	0.314326	DOWN
Zfp59	-0.479639	0.0277769	0.314841	DOWN
Plcg1	-0.304384	0.0278713	0.315294	DOWN
Gpatch1	-0.40437	0.0279087	0.315294	DOWN
Lamtor3	-0.240816	0.0279305	0.315294	DOWN
Tanc2	-0.485301	0.027936	0.315294	DOWN
Trp53rka	0.366271	0.0279396	0.315294	UP
Pip5k1a	0.271641	0.027945	0.315294	UP
Vcan	0.971926	0.0280782	0.316555	UP
Coq10b	0.551837	0.0281262	0.316631	UP
Akr1b7	2.88079	0.0281279	0.316631	UP
P2ry2	0.635561	0.0281659	0.316818	UP
Tnfsf10	-0.883634	0.0284049	0.319263	DOWN
Nup62	0.408682	0.0284299	0.319302	UP
Robo4	0.650544	0.0284985	0.319829	UP
Rcor2	-0.887224	0.0285645	0.320325	DOWN
Swt1	0.431394	0.0286234	0.320743	UP
Swsap1	-0.482733	0.0286925	0.321273	DOWN
Polr2h	0.430596	0.0287715	0.321914	UP
Etv4	3.37369	0.0287982	0.321969	UP
Enc1	0.758423	0.0288556	0.322366	UP
Rdh14	-0.287078	0.0289398	0.323062	DOWN
Cxcl5	1.52855	0.0290503	0.324051	UP
Ttc30a1	-0.699633	0.0290836	0.324074	DOWN
Dazap1	0.204806	0.0290962	0.324074	UP
Musk	1.92289	0.0291268	0.32417	UP
Gcc2	-0.427291	0.0291505	0.32419	DOWN
Pklr	3.68834	0.0292853	0.32542	UP
Gkap1	-0.264601	0.0293206	0.32542	DOWN
Atp6v0b	0.237816	0.0293272	0.32542	UP
Itgax	1.37231	0.0294372	0.326227	UP
Rassf5	0.78299	0.0294598	0.326227	UP
Xrcc1	-0.327729	0.0294662	0.326227	DOWN
Epm2a	-0.322079	0.0295248	0.32663	DOWN
1700017B05Rik	0.674051	0.0295618	0.326795	UP
Zfp950	-0.697122	0.0297229	0.32833	DOWN
Sumf1	-0.257092	0.0297608	0.328503	DOWN
Dnajb13	-2.0394	0.0299381	0.32966	DOWN
Pira2	2.04501	0.0299641	0.32966	UP
H2-Q4	0.5711	0.0299713	0.32966	UP
Sin3a	-0.296266	0.029995	0.32966	DOWN
Bcl3	0.793117	0.0300079	0.32966	UP
Kcne3	1.89065	0.0300437	0.32966	UP
Ppp2cb	0.220063	0.0300551	0.32966	UP
Zfp493	-1.43619	0.0300627	0.32966	DOWN
Zfp157	-0.348565	0.0300665	0.32966	DOWN
Olfr160	2.37263	0.0300711		UP
Cnpy2	-0.332101	0.0301036	0.329822	DOWN
Creb3l1	0.934751	0.030184	0.330458	UP
9130008F23Rik	0.8969	0.03022	0.330607	UP
Dnajc18	-0.358689	0.0302828	0.330703	DOWN
Apobr	1.15084	0.0302878	0.330703	UP
Cct3	0.242801	0.0303046	0.330703	UP
Rreb1	-0.42247	0.0303184	0.330703	DOWN
Slc39a14	0.713235	0.0303811	0.331142	UP
Zfp85	-0.597565	0.030493	0.33211	DOWN
Hist1h2ac	-0.930365	0.0305424	0.33211	DOWN
Zkscan14	-0.416274	0.0305543	0.33211	DOWN
Crcp	-0.357806	0.0305598	0.33211	DOWN
Ugt2a3	1.99196	0.0306104	0.332262	UP
Rnf170	-0.323383	0.0306345	0.332262	DOWN
Rybp	0.318924	0.0306444	0.332262	UP
Gna11	-0.290081	0.0306697	0.332262	DOWN
Mbl1	2.32851	0.0306863	0.332262	UP
Tle3	0.595693	0.0307328	0.332405	UP
Klf12	-0.510562	0.0307445	0.332405	DOWN
Ptpn9	0.450303	0.0308191	0.332787	UP
Senp8	-0.653731	0.0308258	0.332787	DOWN
Map4k1	-1.06939	0.0308636	0.332787	DOWN
Acat3	1.64014	0.0308919	0.332787	UP
Cyp2c70	2.81959	0.0309107	0.332787	UP
Ccdc91	-0.210747	0.030915	0.332787	DOWN
Rpap2	-0.387526	0.0309557	0.332983	DOWN
Aldh1a2	0.87562	0.0310759	0.333197	UP
Kdelr2	0.375369	0.0310776	0.333197	UP
Gpr176	1.85391	0.0310948	0.333197	UP
Asb4	0.634923	0.0311164	0.333197	UP
Wdcp	-0.494456	0.0311173	0.333197	DOWN
Mgat2	0.404101	0.031162	0.333197	UP
Hsd17b11	-0.390224	0.0311827	0.333197	DOWN
Kansl3	-0.256342	0.031198	0.333197	DOWN
Gabpb1	0.37404	0.0311981	0.333197	UP
Crot	-0.38112	0.0312013	0.333197	DOWN
Kit	1.57154	0.0312461	0.333435	UP
2810006K23Rik	-0.433725	0.031286	0.333619	DOWN
Gng10	1.03279	0.0313284	0.333806	UP
Rps18	1.41077	0.0313855	0.333806	UP
Tspan32	-1.85909	0.031394	0.333806	DOWN
Retreg2	-0.292507	0.0314133	0.333806	DOWN
Tubb2b	1.45225	0.0314165	0.333806	UP
Paip2b	-0.304746	0.0314418	0.333835	DOWN
Ppp2r2a	0.422729	0.0314917	0.333955	UP
Ihh	2.84615	0.0315189	0.333955	UP
Aqp9	2.03802	0.0315316	0.333955	UP
Nectin1	0.685087	0.0315436	0.333955	UP
Foxc1	0.568427	0.031674	0.334801	UP
Msn	0.616256	0.0316863	0.334801	UP
Pigg	-0.351636	0.0317051	0.334801	DOWN
Nup85	-0.233215	0.0317305	0.334801	DOWN
Cutc	-0.381809	0.0317368	0.334801	DOWN
Ddx31	0.440205	0.031803	0.335259	UP
Mta3	-0.355709	0.0318596	0.335617	DOWN
Klrd1	2.76961	0.031873		UP
Frat1	-0.709091	0.0319503	0.336238	DOWN
Ddx52	-0.19914	0.0319641	0.336238	DOWN
Sf1	0.297321	0.0321284	0.33752	UP
Fig4	-0.220785	0.0321317	0.33752	DOWN
Zfp57	1.18518	0.0321705	0.337616	UP
Rnf39	0.717031	0.0321865	0.337616	UP
Sfpq	0.36407	0.0322394	0.33793	UP
Relb	0.790565	0.0323705	0.339064	UP
Rtn4rl2	1.0473	0.0325818	0.340798	UP
Cdr2	0.867077	0.0325822	0.340798	UP
Ror1	0.800501	0.0326282	0.340811	UP
C2cd2l	0.657154	0.0326526	0.340811	UP
Slc25a38	-0.334191	0.0326527	0.340811	DOWN
Znrd1as	-0.398811	0.0327174	0.341028	DOWN
Pomgnt2	-0.458058	0.032745	0.341028	DOWN
Fgb	1.68735	0.0327601	0.341028	UP
Kmt5c	-0.584607	0.0327659	0.341028	DOWN
Wdr7	-0.268021	0.0328604	0.341772	DOWN
Nxf1	0.182874	0.0330394	0.343391	UP
Enpp5	-0.654259	0.0330946	0.343723	DOWN
Mall	0.953195	0.0331906	0.344471	UP
Nfatc3	-0.229277	0.0332133	0.344471	DOWN
Naaladl1	2.90036	0.033242		UP
Fam13c	-0.580331	0.0332617	0.344637	DOWN
Sesn2	0.616701	0.033276	0.344637	UP
Tjp2	0.638214	0.0333237	0.34489	UP
Lpar1	0.645517	0.0333588	0.345011	UP
Ncf4	1.20042	0.0334353	0.34527	UP
Ranbp1	0.349609	0.0334732	0.34527	UP
Myo9b	0.305892	0.0334965	0.34527	UP
Nipsnap1	1.17887	0.0334967	0.34527	UP
Hcls1	0.552606	0.0335318	0.34527	UP
Dlgap4	0.281445	0.0335322	0.34527	UP
Prkab2	0.439285	0.0335475	0.34527	UP
Brix1	0.290224	0.0336341	0.345691	UP
B3gnt5	1.1783	0.0336351	0.345691	UP
Kng1	2.37717	0.0337691	0.346826	UP
Senp3	0.298148	0.0338768	0.347533	UP
Gm49359	-0.435503	0.033885	0.347533	DOWN
Ptrh2	-0.307634	0.0339854	0.348321	DOWN
Rcbtb1	-0.429734	0.0340566	0.348808	DOWN
Lmod3	-0.506115	0.0340962	0.348973	DOWN
Fam50a	-0.336515	0.0341992	0.349783	DOWN
Lims1	-0.267239	0.0342437	0.349997	DOWN
Klhl2	0.551924	0.0343007	0.350247	UP
Gng12	0.266607	0.0343156	0.350247	UP
Atmin	-0.236779	0.0344939	0.351414	DOWN
Zfp983	-0.740046	0.0344985	0.351414	DOWN
Abl2	0.381378	0.0345014	0.351414	UP
Cwc27	-0.230486	0.0346146	0.352324	DOWN
Igf2bp2	1.60262	0.034652	0.352462	UP
Fbxo4	0.391364	0.0347205	0.352916	UP
Dnajc7	-0.218645	0.0348814	0.354174	DOWN
Sdhaf2	-0.21154	0.0348923	0.354174	DOWN
Gale	1.49755	0.0349347	0.354221	UP
Fam122a	0.332582	0.0349448	0.354221	UP
Brd9	-0.195416	0.0349691	0.354224	DOWN
Slc35e4	0.666492	0.0350343	0.354641	UP
Fga	1.81948	0.0350682	0.354741	UP
Copg2	-0.263776	0.0351678	0.355505	DOWN
Tmem230	-0.262031	0.035209	0.355678	DOWN
Col4a1	0.774336	0.0352333	0.355681	UP
Lilrb4a	-5.04603	0.0353033	0.356114	DOWN
Gulo	2.82167	0.0353456	0.356114	UP
Shb	0.837219	0.0353897	0.356114	UP
Bmpr2	0.21498	0.0353936	0.356114	UP
Clcn3	-0.307833	0.0353968	0.356114	DOWN
Tti1	-0.266197	0.0354561	0.356271	DOWN
Pyroxd1	-0.402187	0.0354712	0.356271	DOWN
Nicn1	-0.349967	0.0354911	0.356271	DOWN
Arhgef26	0.734349	0.0355114	0.356271	UP
Utp20	0.303383	0.035533	0.356271	UP
Chd7	0.467442	0.0355988	0.356688	UP
Alkbh5	0.148166	0.0356839	0.357299	UP
Pus10	-0.374046	0.035774	0.357958	DOWN
Gmnn	-0.423196	0.0360085	0.359822	DOWN
Dctn5	-0.208847	0.036009	0.359822	DOWN
Ticam2	-1.24656	0.0360923	0.360411	DOWN
Mboat1	2.142	0.0362122	0.361181	UP
L3hypdh	-0.617277	0.0362429	0.361181	DOWN
Tma7	0.354144	0.0362617	0.361181	UP
Cdca4	0.394229	0.0362673	0.361181	UP
Kif3c	-0.449886	0.0363431	0.361692	DOWN
Sppl2b	-0.390453	0.0364602	0.362613	DOWN
Gm4724	-2.42383	0.0365078	0.362842	DOWN
Ttc8	-0.630721	0.0365978	0.36345	DOWN
Rpl18a	0.348755	0.0366702	0.36345	UP
Mt2	0.946143	0.0366715	0.36345	UP
Kidins220	-0.213829	0.0366812	0.36345	DOWN
Apoc4	1.85395	0.0366919	0.36345	UP
Cald1	0.45478	0.0367664	0.363857	UP
Phc3	-0.309612	0.0368014	0.363857	DOWN
Hlcs	-0.352181	0.036807	0.363857	DOWN
Olfr1537	-1.78227	0.0368312		DOWN
Elp6	-0.626522	0.0368641	0.364178	DOWN
Edem1	0.400903	0.0369386	0.36467	UP
Adgrv1	2.05389	0.0369734	0.364709	UP
Dct	1.0113	0.036992	0.364709	UP
Rcc2	0.444964	0.0370508	0.365046	UP
Pelo	0.4188	0.0370866	0.365155	UP
Ldlr	0.825684	0.0372212	0.366236	UP
Triobp	1.32648	0.0373218	0.36682	UP
Ift172	-0.249925	0.0373422	0.36682	DOWN
Lipg	1.52463	0.0373551	0.36682	UP
Kiz	-0.319303	0.0375781	0.368765	DOWN
Emd	0.319756	0.0376305	0.368812	UP
Scamp2	0.261257	0.0376446	0.368812	UP
Cdk17	0.446566	0.0376627	0.368812	UP
Pdcd6ip	0.184032	0.0376828	0.368812	UP
Nudt1	-0.446775	0.0377332	0.36906	DOWN
Olfr1034	-0.806692	0.037879	0.370241	DOWN
Ltb	2.18353	0.037937	0.370507	UP
Ccdc71	-0.186525	0.0379564	0.370507	DOWN
Tubb1	1.8611	0.0380333		UP
Fgg	1.56107	0.038053	0.371205	UP
Apbb2	0.991681	0.0382384	0.372727	UP
Gm12216	-1.58929	0.0382595	0.372727	DOWN
Sf3b2	-0.174153	0.0383412	0.373277	DOWN
Ralgapa1	-0.253964	0.038482	0.373672	DOWN
Bahd1	0.285211	0.0384896	0.373672	UP
B4galt1	0.446793	0.0385032	0.373672	UP
Batf	1.37482	0.0385047	0.373672	UP
Dnal1	-0.453756	0.0385083	0.373672	DOWN
Ormdl1	-0.48724	0.0386264	0.374312	DOWN
Lrfn4	0.584248	0.0386449	0.374312	UP
Dph3	0.217484	0.038665	0.374312	UP
Gadl1	1.83557	0.0386756	0.374312	UP
Hsdl1	-0.28883	0.0387416	0.374487	DOWN
Rbl2	-0.316494	0.0387588	0.374487	DOWN
Acad9	-0.252826	0.0388147	0.374487	DOWN
Plagl1	0.872164	0.0388155	0.374487	UP
Upf3b	-0.330883	0.0388204	0.374487	DOWN
Tgfb1	0.548467	0.0389241	0.374772	UP
Sbk3	0.847496	0.0389449	0.374772	UP
Ces1e	-1.08195	0.0389703	0.374772	DOWN
Asap3	-0.634998	0.0389925	0.374772	DOWN
Zfp112	-0.407325	0.0389941	0.374772	DOWN
Zfp446	-0.571951	0.0390269	0.374772	DOWN
Zyg11b	-0.249891	0.0390277	0.374772	DOWN
Cdc23	-0.190938	0.0392832	0.37698	DOWN
Tsc1	-0.40156	0.0394839	0.378661	DOWN
Ago1	-0.309081	0.0395186	0.378748	DOWN
Zc3h8	-0.344199	0.0396369	0.379335	DOWN
Zfp395	-0.517244	0.0396528	0.379335	DOWN
Rsbn1l	-0.241967	0.0396569	0.379335	DOWN
Lrrc59	0.392499	0.0396857	0.379364	UP
Il17rb	2.48279	0.0398655	0.380837	UP
Zfp281	0.312984	0.0399033	0.380952	UP
Bmi1	-0.235614	0.039966	0.381303	DOWN
Gm14419	-0.75733	0.0400386	0.38175	DOWN
Ss18	0.641301	0.0401274	0.382241	UP
Sat2	-0.483812	0.0401592	0.382241	DOWN
Ddias	1.58638	0.0402108	0.382241	UP
Asb10	-0.399348	0.0402117	0.382241	DOWN
Col5a3	0.689666	0.0402339	0.382241	UP
Trp53	0.38603	0.0402455	0.382241	UP
Rpa1	-0.257927	0.0403482	0.382798	DOWN
Zfp605	-0.531999	0.0403559	0.382798	DOWN
Ipo8	-0.231995	0.0406882	0.385702	DOWN
Fscn1	0.857141	0.0407948	0.386465	UP
Ano4	-0.607093	0.0408555	0.386791	DOWN
Cd69	2.65096	0.0409015		UP
Gmps	-0.217633	0.0409297	0.387096	DOWN
Klhdc10	-0.172046	0.0409401	0.387096	DOWN
Kif1bp	-0.374808	0.041029	0.387298	DOWN
Brca1	-1.66261	0.0410377	0.387298	DOWN
Clec4d	1.78535	0.0410401	0.387298	UP
Trir	0.238277	0.0411651	0.388123	UP
Fn3krp	-0.439826	0.0411948	0.388123	DOWN
Rita1	-0.489031	0.0412064	0.388123	DOWN
Sirt5	-0.286637	0.041345	0.388997	DOWN
Ppm1k	-0.44779	0.0413924	0.388997	DOWN
Ccdc9	0.231584	0.0414304	0.388997	UP
Morn1	1.2148	0.0414388	0.388997	UP
Glyctk	-0.637804	0.0414578	0.388997	DOWN
Dhfr	-0.443814	0.0414639	0.388997	DOWN
Eif5a	0.232661	0.0414835	0.388997	UP
Tbc1d7	-0.272573	0.0415319	0.389203	DOWN
Smurf2	0.261644	0.0416174	0.389758	UP
Ccl2	1.55436	0.0416672	0.389976	UP
Unc13d	1.22855	0.0417247	0.390051	UP
Adrb2	1.02143	0.041728	0.390051	UP
Coq10a	-0.254269	0.0417888	0.390372	DOWN
C530008M17Rik	1.15738	0.0418296	0.390507	UP
Lancl3	0.823245	0.0418564	0.39051	UP
Zfp516	0.391102	0.0418972	0.390644	UP
Olfr843	2.58479	0.0419054		UP
Csrp3	0.479503	0.041963	0.390897	UP
Plat	0.731789	0.0419773	0.390897	UP
Cav3	0.467533	0.042084	0.391542	UP
Fam198b	0.811213	0.0420996	0.391542	UP
Tnfrsf14	-0.667685	0.0421914	0.391776	DOWN
Zfp111	-0.517676	0.0422096	0.391776	DOWN
Tes	0.93836	0.0422349	0.391776	UP
Rnft1	0.289578	0.0422384	0.391776	UP
Muc3a	2.66027	0.0422574	0.391776	UP
Entpd1	0.484111	0.0423564	0.392434	UP
Tead3	-1.83685	0.0423815	0.392434	DOWN
Efna2	-1.44318	0.0424163	0.39251	DOWN
Gm3636	1.41361	0.0424593	0.392662	UP
Cdc42	0.189193	0.0425333	0.3931	UP
Ankle2	-0.166391	0.0426338	0.393529	DOWN
Wipf2	0.258637	0.0426373	0.393529	UP
Apoa5	1.9971	0.0426739	0.393529	UP
Ccdc85b	0.577452	0.0426863	0.393529	UP
Slc2a9	-0.991635	0.0428374	0.394676	DOWN
Lonp2	-0.300949	0.0428786	0.394809	DOWN
Hs6st1	0.422155	0.0429075	0.39483	UP
Srarp	0.860814	0.0430643	0.395509	UP
Nrgn	1.11513	0.0430837	0.395509	UP
Plac9a	1.27499	0.043098	0.395509	UP
Traf3ip1	-0.405683	0.0431144	0.395509	DOWN
Emp1	1.16192	0.0431153	0.395509	UP
Gm14325	-0.491259	0.0431761	0.395704	DOWN
Hnrnpab	0.238531	0.0432038	0.395704	UP
Lect2	2.10907	0.0432169	0.395704	UP
Pde6h	1.31593	0.0432624	0.395875	UP
Trmt61a	0.517972	0.0434171	0.396967	UP
Abce1	0.221988	0.0434545	0.396967	UP
Gpr180	-0.242942	0.0434767	0.396967	DOWN
Cyp1a2	2.51638	0.0434893	0.396967	UP
Atp1b3	0.205912	0.0435685	0.397297	UP
Ercc1	0.804662	0.0435914	0.397297	UP
Zfp951	-0.501154	0.0436061	0.397297	DOWN
Fam24a	2.85502	0.0437267		UP
Cyp3a11	2.11032	0.0437399	0.398271	UP
Mfap2	-1.09358	0.0437709	0.398307	DOWN
Retreg3	-0.21182	0.0439086	0.399141	DOWN
Olfr64	2.50608	0.0439301		UP
Morc2a	0.249033	0.0439403	0.399141	UP
H2afx	0.536351	0.0439436	0.399141	UP
Sgsm3	-1.34892	0.0440251	0.399634	DOWN
Rad50	-0.335827	0.0440521	0.399634	DOWN
Tor1aip2	0.201014	0.044118	0.399987	UP
Frg2f1	-0.564668	0.044297	0.401363	DOWN
Ubtd1	0.363433	0.0444044	0.40209	UP
Slc3a2	0.466385	0.0445115	0.402813	UP
Nudt3	-0.551762	0.0446035	0.403038	DOWN
Vps26b	-0.1957	0.0446181	0.403038	DOWN
Dusp2	1.25788	0.0446183	0.403038	UP
Tpbg	1.03473	0.0446745	0.4033	UP
Rcc1	0.469414	0.0447103	0.403376	UP
Tom1	0.214258	0.044768	0.40365	UP
Ankrd23	0.698118	0.0448218	0.403889	UP
Ttc33	-0.191651	0.0448814	0.404066	DOWN
Cbx8	-0.860925	0.0449111	0.404066	DOWN
F7	1.55783	0.0449236	0.404066	UP
Ecpas	-0.182286	0.0450298	0.404775	DOWN
Gm11992	-0.958322	0.0450949	0.405027	DOWN
Cyp3a25	3.10906	0.0451127	0.405027	UP
Dctn2	-0.152681	0.045253	0.405685	DOWN
Olfr600	1.4937	0.045254	0.405685	UP
Ap4m1	-0.418464	0.0452684	0.405685	DOWN
Rps20	0.319242	0.0453121	0.40583	UP
Wsb2	0.235733	0.0454248	0.406366	UP
Rab27b	0.934708	0.0454269	0.406366	UP
Ggnbp2	-0.253972	0.0455119	0.40688	DOWN
Rps7	0.281419	0.0456005	0.407153	UP
Cyp2c40	3.96922	0.0456103	0.407153	UP
Gtpbp10	-0.247584	0.0456251	0.407153	DOWN
Stx16	-0.214548	0.0457126	0.407291	DOWN
Gmfb	0.21528	0.0457316	0.407291	UP
Eri1	-0.280344	0.0457495	0.407291	DOWN
Tox2	0.691294	0.0457509	0.407291	UP
Odf3b	-3.30817	0.0457935	0.407424	DOWN
Chtop	0.163132	0.0459083	0.408025	UP
Tmem140	-0.63732	0.0459532	0.408025	DOWN
Pwp2	0.311458	0.0459637	0.408025	UP
Fignl2	0.665645	0.0459716	0.408025	UP
Tmub1	-0.413995	0.046039	0.408351	DOWN
Flrt3	1.48833	0.0461067	0.408351	UP
Napepld	0.536378	0.0461273	0.408351	UP
Rundc1	-0.278401	0.0461416	0.408351	DOWN
Serpina1b	1.34446	0.0461466	0.408351	UP
Etfrf1	-0.334188	0.0461964	0.408548	DOWN
Exosc7	-0.300217	0.0462259	0.408564	DOWN
Sh3bgrl3	0.505234	0.0463768	0.409128	UP
Rsrc2	-0.283999	0.0463955	0.409128	DOWN
Ksr2	1.8938	0.046402	0.409128	UP
Sox17	0.642269	0.0464185	0.409128	UP
Prkaa2	-0.293183	0.0464345	0.409128	DOWN
Acot9	0.363209	0.0464559	0.409128	UP
Dtl	2.20795	0.0465603	0.409564	UP
Egr2	2.0368	0.0465609	0.409564	UP
Chrna10	-0.758196	0.0467805	0.411251	DOWN
Ces1g	1.99506	0.0468461	0.411582	UP
Mtfr2	3.45883	0.0468477		UP
Alg1	-0.271591	0.0469122	0.411918	DOWN
Slc19a2	0.320039	0.0469411	0.411927	UP
Alms1	-0.502352	0.0470864	0.412765	DOWN
Mzf1	-2.37657	0.0470935		DOWN
Rpl29	0.266661	0.0471011	0.412765	UP
Abhd17c	0.368803	0.0471205	0.412765	UP
Scd1	0.951803	0.0472154	0.413282	UP
Pfkp	0.634031	0.0472355	0.413282	UP
Lonrf2	-0.450245	0.0473518	0.413847	DOWN
Ankrd13c	0.261361	0.047356	0.413847	UP
Tut4	-0.304608	0.0474459	0.413987	DOWN
Bhlhe40	0.785627	0.0474553	0.413987	UP
Iqgap1	0.389622	0.0474669	0.413987	UP
Npc1	-0.44683	0.0475072	0.413987	DOWN
Cep68	-0.372415	0.0475414	0.413987	DOWN
Tmbim1	0.458106	0.0475822	0.413987	UP
Clcc1	-0.207753	0.0475896	0.413987	DOWN
Gpr17	0.895524	0.0475963	0.413987	UP
Mrpl18	-0.2063	0.0476812	0.414481	DOWN
Zfp944	-0.361609	0.0477932	0.415211	DOWN
Olfr1196	2.45075	0.0478485		UP
Rab14	-0.132741	0.0478768	0.415692	DOWN
Bmpr1b	1.68865	0.0479352	0.415954	UP
AI606181	0.411012	0.0480388	0.416609	UP
Rnf166	-0.325792	0.048265	0.418325	DOWN
Ogfod2	-0.364413	0.0483014	0.418395	DOWN
C1d	-0.20903	0.0483304	0.418401	DOWN
Slc1a1	1.71943	0.048417	0.418467	UP
Pikfyve	-0.244382	0.0484178	0.418467	DOWN
Mlycd	-0.353793	0.0484231	0.418467	DOWN
Gnaq	0.232211	0.048531	0.419155	UP
Ufl1	-0.247666	0.0485785	0.41932	DOWN
Myo15b	2.91146	0.048607	0.41932	UP
Rab7	0.199006	0.0486777	0.419685	UP
Dcbld2	0.447223	0.04883	0.420683	UP
Tyw3	-0.482292	0.0488678	0.420683	DOWN
Cnot10	-0.222527	0.0488789	0.420683	DOWN
Nipal3	-0.423805	0.0491861	0.422836	DOWN
Rpsa	0.288268	0.0491957	0.422836	UP
Mt1	0.66498	0.0492467	0.422836	UP
Kifap3	-0.264098	0.0492689	0.422836	DOWN
U2af1	0.305096	0.0492721	0.422836	UP
Rbm14	0.383384	0.0493371	0.422959	UP
Reep1	-0.321687	0.0493437	0.422959	DOWN
Tinf2	0.38349	0.0494091	0.423273	UP
Mphosph8	-0.256749	0.0494765	0.423605	DOWN
Olfr715b	2.63097	0.0494772		UP
Lrrc58	0.412314	0.0495207	0.423738	UP
Ccdc159	-0.765515	0.0495624	0.423849	DOWN
Lcmt1	-0.369865	0.0496683	0.424308	DOWN
Dnajc16	-0.235432	0.0496736	0.424308	DOWN
Bmp4	0.463721	0.0498304	0.425401	UP
Rpl18	0.272728	0.049942	0.426108	UP
Gosr1	0.245691	0.0500416	0.426577	UP
Ipo7	0.276502	0.0500547	0.426577	UP
Ypel2	-0.454704	0.0500899	0.426631	DOWN
Chst3	0.582287	0.0501629	0.426691	UP
Zrsr2	0.282794	0.0501821	0.426691	UP
Tsku	0.919046	0.0502355	0.426691	UP
Rps12	1.16273	0.0502388	0.426691	UP
Sept9	0.479735	0.050267	0.426691	UP
Pard3	-0.230422	0.0502704	0.426691	DOWN
Lrrc20	-0.402178	0.0503102	0.426784	DOWN
Dio1	2.6895	0.0503742	0.427082	UP
2310002L09Rik	0.304648	0.0504168	0.427183	UP
Vrk2	-0.385049	0.0504448	0.427183	DOWN
Tvp23b	-0.356427	0.0504729	0.427183	DOWN
Cenpx	0.358064	0.0505606	0.42768	UP
Vxn	2.41479	0.0507667		UP
Glod4	-0.245171	0.0508536	0.429281	DOWN
Mief1	-0.748857	0.0508661	0.429281	DOWN
Gldc	0.713461	0.0508732	0.429281	UP
Igfbp3	0.749115	0.0508832	0.429281	UP
Polr3c	-0.243401	0.0508952	0.429281	DOWN
Cdca7	0.791947	0.0509832	0.429778	UP
Cpn1	1.88209	0.0510492	0.430088	UP
Slc25a19	-0.455575	0.0510921	0.430205	DOWN
Xrn2	-0.22735	0.0511975	0.430689	DOWN
4833420G17Rik	-0.333949	0.0512079	0.430689	DOWN
Dynlt1c	4.17931	0.0513581	0.431647	UP
Ascc1	-0.25216	0.0513803	0.431647	DOWN
Ppp4r2	0.262505	0.0514102	0.431653	UP
Fam25c	-2.21583	0.051487	0.432052	DOWN
Zfp442	-0.507764	0.051548	0.432226	DOWN
Acsm3	2.18226	0.0515663	0.432226	UP
Mgea5	-0.217695	0.0516519	0.432554	DOWN
Prpf38a	0.225766	0.0516639	0.432554	UP
Nufip2	0.253092	0.0517251	0.43258	UP
Ripply1	-2.62304	0.0517256	0.43258	DOWN
Gmfg	0.624016	0.0520302	0.434881	UP
Shprh	-0.284326	0.0520678	0.434949	DOWN
Exd2	-0.314254	0.0521266	0.435194	DOWN
Sh3bp2	0.606307	0.0522273	0.435421	UP
Dpagt1	-0.353959	0.0522282	0.435421	DOWN
Eef1a2	-0.299254	0.0522423	0.435421	DOWN
Cmtr2	0.417486	0.0523356	0.435953	UP
Ppp1r10	0.534303	0.0524496	0.436656	UP
Armh3	-0.236049	0.0524909	0.436708	DOWN
Uroc1	1.67323	0.0525465	0.436708	UP
Mat1a	1.44873	0.0525989	0.436708	UP
Unc79	-2.87942	0.0526003	0.436708	DOWN
Id2	0.614574	0.0526037	0.436708	UP
Zfand1	-0.260924	0.0526824	0.437116	DOWN
Sema6d	0.576613	0.0527438	0.437337	UP
Gm4631	-0.343279	0.0527683	0.437337	DOWN
Cenpo	-0.638785	0.0527997	0.437352	DOWN
Fadd	-0.30328	0.0528575	0.437532	DOWN
Klhdc1	-0.387263	0.0528806	0.437532	DOWN
Pilrb2	1.60057	0.0529405	0.437532	UP
Ubr7	-0.223259	0.0529501	0.437532	DOWN
Tiam1	-1.06662	0.0529695	0.437532	DOWN
Pgbd5	1.52891	0.0530112		UP
Nek3	-0.698491	0.0530664	0.437897	DOWN
Pik3r2	-0.3363	0.053073	0.437897	DOWN
Pdcd11	0.286935	0.0531203	0.438042	UP
Mthfsl	0.435182	0.0531777	0.438271	UP
Slc38a9	-0.226455	0.0532737	0.438817	DOWN
Vac14	0.273519	0.0533269	0.439011	UP
Nhp2	0.391679	0.0534072	0.439197	UP
Rfc3	-0.644933	0.053409	0.439197	DOWN
Tnfrsf9	1.76629	0.0534639	0.439209	UP
Slc17a2	1.87558	0.0534817	0.439209	UP
Mdn1	0.530741	0.0535164	0.439209	UP
Psg23	0.944011	0.0535294	0.439209	UP
Apoa2	1.2804	0.0536286	0.439773	UP
P2ry6	0.782269	0.0536578	0.439773	UP
Alox5ap	0.707129	0.0537158	0.439867	UP
Acot6	-0.451959	0.0537288	0.439867	DOWN
Tomm20	0.215534	0.053776	0.44001	UP
G3bp1	0.207011	0.0539596	0.441267	UP
Ptpn2	0.332079	0.0540597	0.441554	UP
Zscan22	0.551718	0.0540671	0.441554	UP
Ythdf2	0.310531	0.0540858	0.441554	UP
Mybbp1a	0.244051	0.0541142	0.441554	UP
Ccdc15	-0.745212	0.0541466	0.441575	DOWN
Hist2h3c1	-1.0076	0.0543534	0.442907	DOWN
Ube2v1	0.186557	0.05437	0.442907	UP
Rxra	-0.33727	0.0544244	0.443046	DOWN
Chac2	-0.452543	0.054447	0.443046	DOWN
Rsl1	-0.368469	0.054511	0.443279	DOWN
Aarsd1	-0.259063	0.0545357	0.443279	DOWN
Alas1	0.674558	0.0546692	0.443879	UP
Gtf2h4	-0.294642	0.0547279	0.443879	DOWN
Exoc4	-0.290871	0.0547375	0.443879	DOWN
Cadps2	-0.917134	0.0547462	0.443879	DOWN
Zfp141	-0.403082	0.0547598	0.443879	DOWN
Bcl11a	-0.624832	0.0548952	0.444715	DOWN
Ugt2b5	1.68205	0.0549511	0.444715	UP
Lmbr1	-0.30325	0.0549532	0.444715	DOWN
Ribc1	-0.852395	0.0550084	0.444917	DOWN
Olfr714	-2.5413	0.0550371		DOWN
Trem3	2.95281	0.0550457		UP
Olfr889	2.17954	0.055099	0.445406	UP
Rpl35a	0.231269	0.0551489	0.445566	UP
Rgsl1	-3.05914	0.0551657		DOWN
Setd3	-0.159619	0.0552584	0.446004	DOWN
Pde1b	0.816958	0.0552636	0.446004	UP
Pdgfa	0.464255	0.0553678	0.446585	UP
Exosc9	-0.197072	0.0553961	0.446585	DOWN
Cpne2	0.642202	0.055427	0.446591	UP
Rock2	0.429075	0.0555101	0.447017	UP
Nhsl2	0.428622	0.0556088	0.447153	UP
Zfp81	-0.314617	0.055618	0.447153	DOWN
Irak2	0.647056	0.0556599	0.447153	UP
Runx1t1	-0.568339	0.0556728	0.447153	DOWN
Ptbp3	0.30815	0.0556843	0.447153	UP
Cdkn1b	-0.316315	0.0557087	0.447153	DOWN
Phex	-2.22296	0.055778		DOWN
Olfr344	0.945494	0.055778	0.447349	UP
Hrc	-0.291465	0.0557937	0.447349	DOWN
Ednrb	0.785987	0.055975	0.448546	UP
Drp2	1.34332	0.0560037	0.448546	UP
Fbl	0.288052	0.05615	0.449242	UP
Aff1	0.425994	0.0561515	0.449242	UP
Rhog	0.294608	0.0562971	0.450163	UP
Cog5	-0.2869	0.0563739	0.450316	DOWN
Col6a3	0.65594	0.0564173	0.450316	UP
Mapk8	0.274344	0.0564313	0.450316	UP
Lrpprc	-0.250627	0.0564381	0.450316	DOWN
Asxl2	-0.314586	0.0564735	0.450355	DOWN
Adam22	-0.399746	0.0565342	0.450473	DOWN
Vamp4	-0.224124	0.0565613	0.450473	DOWN
Gm10134	-1.64899	0.0565798	0.450473	DOWN
Col4a2	0.631386	0.0566392	0.450703	UP
P2rx4	-0.347337	0.056755	0.451211	DOWN
Galnt16	0.741562	0.0568014	0.451211	UP
Pfkfb3	1.00994	0.0568282	0.451211	UP
Smim19	-0.380221	0.0568572	0.451211	DOWN
Rhoq	-0.273476	0.0568724	0.451211	DOWN
Mrps21	0.253168	0.0569036	0.451211	UP
Osbp	-0.272818	0.0569329	0.451211	DOWN
Btg3	0.907829	0.0569595	0.451211	UP
Clasp2	-0.21985	0.0570262	0.451211	DOWN
Rad52	0.745974	0.0570348	0.451211	UP
Mug2	1.60891	0.0570534	0.451211	UP
Zfp882	-0.662963	0.0570865	0.451211	DOWN
Kcnc1	-0.975737	0.0571002	0.451211	DOWN
Ccdc181	-0.366805	0.057205	0.451533	DOWN
Dnal4	-1.52598	0.0572569	0.451533	DOWN
Mrpl22	-0.224893	0.0572722	0.451533	DOWN
Agxt2	2.12984	0.0573088	0.451533	UP
Avpr1a	0.728517	0.057358	0.451533	UP
Pgam1	0.38672	0.0574378	0.451533	UP
Six1	-0.736366	0.0574536	0.451533	DOWN
Dpys	2.44264	0.0574601	0.451533	UP
Gm26602	3.88453	0.0575369	0.451533	UP
Arhgap12	-0.240018	0.0575514	0.451533	DOWN
Cyp2j6	-0.368175	0.0575708	0.451533	DOWN
Grm1	-0.446351	0.0575797	0.451533	DOWN
Tbc1d9b	-0.206387	0.0575859	0.451533	DOWN
Riox1	0.413083	0.0576028	0.451533	UP
Plekha8	0.281866	0.0576073	0.451533	UP
Serpina1d	1.51217	0.0576302	0.451533	UP
Cd160	1.93405	0.0576846		UP
Map1b	0.907303	0.0577018	0.451855	UP
Stt3a	0.349192	0.0577516	0.452005	UP
Ms4a6d	0.74845	0.0577897	0.452063	UP
Med13l	0.254202	0.0578345	0.452174	UP
Ccnd3	0.232518	0.0578716	0.452225	UP
Odf2l	-0.367403	0.0579279	0.452425	DOWN
Lime1	-0.645522	0.0580603	0.45322	DOWN
Mogs	0.520693	0.0581624	0.453691	UP
Zbtb26	-0.597693	0.058182	0.453691	DOWN
5330417C22Rik	2.3001	0.0584025		UP
Zfp108	-0.537237	0.0584628	0.45564	DOWN
Gm45799	-2.0516	0.0585107	0.455772	DOWN
Zranb2	-0.393142	0.0586629	0.456491	DOWN
Stk35	-0.266765	0.0586911	0.456491	DOWN
Inpp1	-0.332966	0.0587062	0.456491	DOWN
Atp8b1	0.495104	0.0587491	0.456491	UP
Ankrd12	-1.38107	0.0587575	0.456491	DOWN
Mup17	2.41207	0.0588351	0.456854	UP
Rnf139	-0.192204	0.0589507	0.457511	DOWN
Yes1	0.349542	0.0591013	0.457803	UP
Qtrt2	0.524472	0.0591014	0.457803	UP
Asns	0.936291	0.059128	0.457803	UP
Ranbp6	-0.212831	0.0591288	0.457803	DOWN
Fam189a2	0.444177	0.0591536	0.457803	UP
Grk1	-0.502541	0.0591933	0.457803	DOWN
Agfg1	0.189743	0.0592053	0.457803	UP
Mrpl49	-0.265479	0.0592488	0.457862	DOWN
Pkia	-0.313401	0.059275	0.457862	DOWN
Hspb2	0.325698	0.0593134	0.457919	UP
Mcm4	-0.307502	0.059375	0.458155	DOWN
Strn	-0.184624	0.0594296	0.458338	DOWN
Smarcc2	-0.24398	0.0595199	0.458698	DOWN
Cntf	0.98779	0.0595497	0.458698	UP
Rassf10	-1.08158	0.0595771	0.458698	DOWN
Slc6a20b	-1.32817	0.0596326	0.458698	DOWN
Cep78	-0.418426	0.059637	0.458698	DOWN
Pym1	0.354528	0.0596823	0.458698	UP
Cbx2	-0.662769	0.0597131	0.458698	DOWN
Nr5a2	0.854883	0.0597248	0.458698	UP
Camk1d	0.728042	0.0597637	0.458758	UP
Fut10	-0.558009	0.0598713	0.459006	DOWN
Sowahc	0.553363	0.0598785	0.459006	UP
Ddx19a	-0.190181	0.0598893	0.459006	DOWN
Csnk1a1	0.171584	0.0599621	0.459326	UP
Pik3r5	0.730101	0.0600614	0.459631	UP
Pvr	0.562457	0.0601062	0.459631	UP
Gss	0.28192	0.0601156	0.459631	UP
Chrd	-0.995841	0.0601264	0.459631	DOWN
Ngfr	1.30917	0.0601655	0.459692	UP
Msh3	-0.544845	0.0603167	0.460609	DOWN
Cyp2u1	-0.520638	0.0604128	0.460976	DOWN
Ints11	-0.208077	0.0604272	0.460976	DOWN
Oasl2	1.125	0.0604722	0.461062	UP
Tm6sf2	-0.872381	0.0605233	0.461062	DOWN
Ecscr	0.577141	0.0605394	0.461062	UP
Pxdc1	1.48519	0.0605634	0.461062	UP
2900026A02Rik	0.36231	0.0606596	0.46137	UP
Zfp691	-0.309516	0.0606997	0.46137	DOWN
Fam57b	0.685922	0.0607501	0.46137	UP
Slmap	0.2926	0.0607588	0.46137	UP
Seh1l	0.191178	0.06076	0.46137	UP
Cep70	-0.444982	0.0608288	0.461655	DOWN
Asgr1	1.38157	0.060909	0.462026	UP
Aldh7a1	-0.280171	0.0609838	0.462221	DOWN
Dpysl3	0.508194	0.0609972	0.462221	UP
Trmt10b	-0.447449	0.0610637	0.462487	DOWN
Gpr22	-0.379061	0.0613159	0.464159	DOWN
Zmynd11	-0.151182	0.0613875	0.464463	DOWN
Zscan2	-0.566172	0.0614733	0.464598	DOWN
Ngrn	-0.354919	0.0615041	0.464598	DOWN
Tnfaip8l1	0.669918	0.0615361	0.464598	UP
Tedc2	-1.01715	0.0615407	0.464598	DOWN
Mlh1	-0.355336	0.0615627	0.464598	DOWN
Ndst2	0.282677	0.0617054	0.465437	UP
Dnajc28	-0.453676	0.0620179	0.467039	DOWN
Atp6v1e1	-0.220485	0.0620378	0.467039	DOWN
[truncated: 19,839 more rows]

## Sheet: Liver (24h)
Gene name	L2FC	P-VALUE	P-ADJ	DIRECTION
Pfkm	22.5046	1.14734e-31	1.60845e-27	UP
Gm14440	21.5311	7.77356e-23	5.44887e-19	UP
Etv4	-15.9152	2.02978e-19	9.48516e-16	DOWN
Acbd7	-15.1833	5.79571e-17		DOWN
Igdcc4	3.68723	4.28922e-15	1.50327e-11	UP
Nxph4	-14.9697	5.57312e-15	1.56259e-11	DOWN
Prom2	15.435	2.01019e-13	4.6968e-10	UP
Cyp4f14	-2.24846	1.23579e-11	2.47494e-08	DOWN
Gm45837	23.0895	2.49586e-11	4.37369e-08	UP
Gsta4	-1.78785	7.21891e-11	1.12447e-07	DOWN
Plin4	2.33509	1.78157e-09	2.49758e-06	UP
Fabp5	-2.25747	2.42131e-08	3.08585e-05	DOWN
Arhgap6	-1.49947	2.65822e-08	3.10547e-05	DOWN
Myom3	2.83917	3.30985e-08	3.56929e-05	UP
Rbm3	1.44006	4.15328e-08	4.15892e-05	UP
Bst2	-1.12636	4.81619e-08	4.50121e-05	DOWN
E030018B13Rik	3.20074	3.40849e-07	0.000298647	UP
Sult1e1	3.93371	4.21026e-07	0.000347198	UP
Dpy19l3	-1.51766	6.98837e-07	0.000512296	DOWN
Lifr	-1.05618	7.03394e-07	0.000512296	DOWN
Trub2	0.845468	7.3086e-07	0.000512296	UP
Thap12	0.561903	9.63853e-07	0.000643441	UP
Cyp4a31	2.49114	1.12533e-06	0.00071709	UP
Gpat3	1.725	1.26153e-06	0.000768927	UP
Rasl10b	1.76522	1.51029e-06	0.0008822	UP
Colgalt2	-2.0928	1.77092e-06	0.000993064	DOWN
Rnf167	-0.465449	2.00442e-06	0.00108077	DOWN
Slc44a2	-1.79052	2.22514e-06	0.00115534	DOWN
Nqo2	-0.826285	2.77634e-06	0.00132999	DOWN
Gal3st4	-18.3629	2.84155e-06	0.00132999	DOWN
Gstp2	-1.50009	2.84611e-06	0.00132999	DOWN
Nova1	2.12844	5.41025e-06	0.00244665	UP
Topbp1	-0.647035	5.93276e-06	0.0025991	DOWN
Tg	5.42385	6.94323e-06	0.00294961	UP
Psmb10	-0.925056	9.82913e-06	0.00405278	DOWN
Sec23a	0.37659	1.03711e-05	0.00415407	UP
Emg1	-0.413938	1.11927e-05	0.00424531	DOWN
Omd	1.47626	1.12045e-05	0.00424531	UP
Cyp26a1	-2.67137	1.15533e-05	0.00426227	DOWN
Afm	-0.895433	1.53261e-05	0.00550915	DOWN
Crat	1.32786	1.86574e-05	0.00634486	UP
Apeh	-0.522769	1.87082e-05	0.00634486	DOWN
Ppp1r3g	-3.72642	1.90088e-05	0.00634486	DOWN
Ctps	1.0731	2.08302e-05	0.00679113	UP
Ankrd40	0.447744	2.14259e-05	0.00682659	UP
Rasd2	-4.40449	2.38118e-05	0.00741815	DOWN
Slc17a1	0.696422	2.45512e-05	0.00748224	UP
Arid3a	1.98164	2.63313e-05	0.007854	UP
Abcc5	4.35935	2.7094e-05	0.00791313	UP
Mgst3	-1.2741	2.85471e-05	0.00811673	DOWN
Tars2	-0.496988	2.8949e-05	0.00811673	DOWN
Eid2b	0.786593	2.99911e-05	0.00824402	UP
Tbc1d9b	-0.462407	3.19846e-05	0.00862293	DOWN
Rab30	1.67479	3.45425e-05	0.00913683	UP
Rbm25	0.448247	3.70044e-05	0.00947415	UP
Bcor	0.729043	3.71694e-05	0.00947415	UP
Baat	0.491888	4.17868e-05	0.0104523	UP
Ccni	0.449111	4.25014e-05	0.0104523	UP
Tor3a	1.20215	4.32435e-05	0.0104523	UP
Oas1a	-1.35183	4.54707e-05	0.0108043	DOWN
Cenpw	-0.833264	5.02148e-05	0.0117327	DOWN
Rnf6	-0.396289	5.1743e-05	0.0118251	DOWN
Hp1bp3	0.279701	5.22975e-05	0.0118251	UP
Tmem136	1.91259	5.53991e-05	0.0123276	UP
Atp11a	-1.31701	6.31972e-05	0.0138431	DOWN
Epm2aip1	0.596053	6.49441e-05	0.0140069	UP
Pspc1	0.942741	6.7773e-05	0.0142948	UP
P2rx4	-0.671173	6.8318e-05	0.0142948	DOWN
Pkm	-0.732301	7.23652e-05	0.0149189	DOWN
Oasl2	-3.07067	8.94597e-05	0.0177991	DOWN
Cpt1b	1.3138	8.95599e-05	0.0177991	UP
Gjc3	1.25592	9.01445e-05	0.0177991	UP
Cyp4a32	1.54115	9.86674e-05	0.0192114	UP
Xaf1	-1.0561	0.000103795	0.0198047	DOWN
Desi2	0.524335	0.00010454	0.0198047	UP
Ano8	-1.17707	0.000106816	0.019966	DOWN
Wdr5	-0.296475	0.000110899	0.0201253	DOWN
Srsf2	0.658285	0.000112351	0.0201253	UP
Atg14	-0.729188	0.000115921	0.0201253	DOWN
Rab1a	0.299163	0.00011664	0.0201253	UP
Hprt	0.516249	0.000116754	0.0201253	UP
Ube2d2a	0.30032	0.00011746	0.0201253	UP
Acat1	0.79181	0.000117717	0.0201253	UP
Acacb	-1.49855	0.000140614	0.0237503	DOWN
Ifi44	-1.21374	0.000144346	0.0240902	DOWN
Stx1b	1.33738	0.000146148	0.0241042	UP
Lgalsl	0.670754	0.000148131	0.0241471	UP
Dnajc2	0.375286	0.000150492	0.02425	UP
Tomm20	0.424273	0.000155194	0.0247234	UP
Serpina6	-2.1228	0.00016607	0.0261588	DOWN
Nudcd3	-0.594789	0.000168878	0.0263056	DOWN
Acot2	1.72002	0.000183483	0.0282665	UP
Osgin1	-1.23592	0.00020365	0.0310322	DOWN
Mcm6	-0.751469	0.000209741	0.0314327	DOWN
Inmt	-1.84469	0.000210762	0.0314327	DOWN
Slc26a6	-1.37553	0.00021553	0.0318054	DOWN
Trim37	-0.449237	0.000223641	0.0326585	DOWN
Rgs12	-0.869292	0.000228161	0.0329752	DOWN
Ly6e	-0.690723	0.000232328	0.0332348	DOWN
Hps4	-0.778068	0.000242908	0.0342114	DOWN
Dnaja3	0.385744	0.000244036	0.0342114	UP
Sesn3	-0.586248	0.00025449	0.0350227	DOWN
Plekha1	0.833448	0.000257572	0.0350227	UP
Gstm1	-0.736069	0.000258615	0.0350227	DOWN
Nipa1	-1.00803	0.000259816	0.0350227	DOWN
Cln6	-0.767637	0.000266594	0.0353791	DOWN
Itga9	-0.831559	0.000267508	0.0353791	DOWN
Hsd17b6	-2.06303	0.000277079	0.0363026	DOWN
St3gal5	1.01138	0.000284995	0.0369939	UP
Klf13	-0.830707	0.000290326	0.0373402	DOWN
Map4k3	-5.89157	0.000302924	0.0386063	DOWN
Cyb5r1	-0.706708	0.000309474	0.0390857	DOWN
Ints11	-0.374772	0.000315895	0.0395405	DOWN
Shld2	0.883494	0.000325754	0.0404136	UP
Ikbkg	0.328445	0.000330749	0.0406735	UP
Gstm3	-1.86625	0.000334376	0.0407618	DOWN
Ccdc62	1.41774	0.000339693	0.0409132	UP
Syncrip	0.462603	0.000341454	0.0409132	UP
Fam210b	0.502362	0.000353066	0.0419461	UP
Cbfa2t3	1.52176	0.000356836	0.0420376	UP
Esm1	-3.29653	0.000362038	0.0422951	DOWN
Tceal5	2.11118	0.000377785	0.04377	UP
Fat4	-1.57454	0.000383846	0.0437996	DOWN
Nucks1	0.533951	0.000384534	0.0437996	UP
Calm3	-0.393125	0.000387413	0.0437996	DOWN
Slc39a3	-5.3928	0.000394297	0.0440478	DOWN
Wdtc1	-0.41841	0.000395893	0.0440478	DOWN
Zfp746	0.534747	0.000400402	0.0441988	UP
Fars2	-0.592386	0.000404346	0.0442854	DOWN
Gtpbp2	-0.486597	0.00040833	0.0443751	DOWN
Bcap29	0.496848	0.000412018	0.0443788	UP
Them4	0.494474	0.000417751	0.0443788	UP
Surf2	0.584931	0.000417861	0.0443788	UP
Npffr1	2.46236	0.000425245	0.0448234	UP
Ppig	0.323466	0.000431678	0.0451619	UP
Chmp3	-0.254767	0.000456634	0.0474189	DOWN
Akap12	-4.18449	0.000462949	0.0477212	DOWN
Vps52	-5.13992	0.000475933	0.0487014	DOWN
Gadd45b	1.70028	0.000495839	0.0500951	UP
Bmper	1.68061	0.000499877	0.0500951	UP
H1fx	-3.80157	0.000500272	0.0500951	DOWN
Stt3b	0.51325	0.000511405	0.0505582	UP
Sulf1	-1.32415	0.00051211	0.0505582	DOWN
Inca1	0.840329	0.000518183	0.0506449	UP
Folr2	-1.30611	0.000523991	0.0506449	DOWN
Ythdf2	0.547393	0.000529405	0.0506449	UP
Lmo4	0.770399	0.000531869	0.0506449	UP
Ssb	0.364371	0.000536166	0.0506449	UP
Fam71e1	2.16019	0.000537573	0.0506449	UP
Klhl32	3.16193	0.000541817	0.0506449	UP
Vamp2	0.441658	0.000549852	0.0506449	UP
Mki67	-2.71153	0.000550587	0.0506449	DOWN
Hist1h4i	-1.23654	0.000551328	0.0506449	DOWN
Tcea2	1.57686	0.000557854	0.0506449	UP
Ei24	0.302478	0.000559766	0.0506449	UP
Paics	-0.333893	0.000559951	0.0506449	DOWN
Hes6	-0.645198	0.00057032	0.051252	DOWN
Cldnd1	0.493399	0.000588254	0.0525236	UP
Anp32e	0.336919	0.000592763	0.0525236	UP
Cdkn2aip	0.458558	0.000595709	0.0525236	UP
Srebf1	-0.93355	0.000639397	0.0560232	DOWN
Hr	2.08662	0.000650854	0.0566728	UP
Elmod3	0.705283	0.000695974	0.0602275	UP
Spopl	0.693836	0.000717541	0.0617129	UP
Pym1	0.548162	0.00072597	0.0620571	UP
Abca3	-0.565937	0.000734141	0.0623753	DOWN
Fbxl20	-0.438601	0.000747416	0.0628059	DOWN
Mapre1	0.348582	0.000748169	0.0628059	UP
Minpp1	0.324323	0.000753405	0.062869	UP
Eme2	0.806938	0.000763834	0.0629799	UP
Wdr45b	-0.440256	0.000767134	0.0629799	DOWN
Sdc3	-0.731772	0.000770058	0.0629799	DOWN
Ctsb	-0.539771	0.000773064	0.0629799	DOWN
Crnkl1	0.385009	0.000777197	0.0629799	UP
Hmgn3	-1.76018	0.000784403	0.0631985	DOWN
Ncaph2	-0.426321	0.000807588	0.0643465	DOWN
Grk3	0.88766	0.000813435	0.0643465	UP
Odf2l	0.643638	0.000813472	0.0643465	UP
Slc22a28	-1.73944	0.000817011	0.0643465	DOWN
Snupn	0.551463	0.000827598	0.0648162	UP
Cyp2c23	-0.865096	0.00083376	0.064936	DOWN
Kcna2	-1.54028	0.000858369	0.0662368	DOWN
Adra1b	-0.7359	0.000859911	0.0662368	DOWN
Itga2	2.09	0.000874346	0.0667358	UP
Hsd17b7	1.01854	0.000875911	0.0667358	UP
Sdhaf1	0.545364	0.000883852	0.0668679	UP
Klhdc8b	1.11588	0.000887184	0.0668679	UP
Gm14326	0.586754	0.000892694	0.0669234	UP
Gskip	0.450606	0.000900147	0.0671232	UP
Foxm1	-3.60462	0.000906182	0.0672157	DOWN
G3bp2	0.331302	0.000932439	0.0685763	UP
Acsm1	-0.475368	0.000934309	0.0685763	DOWN
Gle1	-0.320354	0.000954726	0.0697099	DOWN
Serpina9	-3.08915	0.000983648		DOWN
Myl3	3.39656	0.00100155	0.0727496	UP
Ttc4	-0.3768	0.00102058	0.0733211	DOWN
Paox	-0.736404	0.00102311	0.0733211	DOWN
Pml	-0.69397	0.00102647	0.0733211	DOWN
Anapc1	-0.361105	0.00103033	0.0733211	DOWN
Pbk	-3.70629	0.00104966		DOWN
Vmn1r13	1.80686	0.00105818	0.0745945	UP
Ephb2	1.43018	0.00105887	0.0745945	UP
Cd63	0.793111	0.00107203	0.0748492	UP
Rbmx	0.638612	0.00107316	0.0748492	UP
Slfn9	-0.840319	0.00108962	0.0753182	DOWN
Ube2l6	-0.53267	0.00109714	0.0753182	DOWN
Dynll2	-0.376469	0.00109913	0.0753182	DOWN
Xpot	0.319065	0.00110169	0.0753182	UP
Nat8f1	-0.929938	0.00110675	0.0753182	DOWN
Zfp341	-2.78173	0.001116	0.0755001	DOWN
Lrfn3	1.25913	0.0011202	0.0755001	UP
Dnase1l3	-0.695041	0.00112593	0.0755237	DOWN
Wnt5a	0.941317	0.00113463	0.0757449	UP
Abcb6	-0.627499	0.00115176	0.0765237	DOWN
Cep89	-0.648151	0.00118416	0.0783055	DOWN
Csdc2	-2.49283	0.00119133	0.0784096	DOWN
Mcl1	-0.444256	0.00119739	0.0784402	DOWN
Rnf19b	-0.62635	0.00121404	0.0784409	DOWN
Siglec1	-1.16338	0.00122592	0.0784409	DOWN
Habp4	-0.289808	0.00122709	0.0784409	DOWN
Retsat	1.17939	0.00122752	0.0784409	UP
Crhr2	-3.37678	0.00122913	0.0784409	DOWN
Nrep	-1.14214	0.00123097	0.0784409	DOWN
Ifi27l2a	-1.53334	0.00130611	0.0825794	DOWN
Cryl1	-0.731177	0.00131187	0.0825794	DOWN
Lxn	-3.08624	0.00131359	0.0825794	DOWN
Wdr55	-0.416023	0.00133057	0.0832733	DOWN
Ppp3cc	0.689349	0.00136424	0.0850011	UP
Nap1l5	3.34144	0.00138416	0.0858611	UP
Cfap157	3.48059	0.00141253	0.0872348	UP
Psmb9	-0.73107	0.00142026	0.0873274	DOWN
Psmb8	-0.737774	0.00142653	0.0873295	DOWN
Naif1	0.599551	0.00144803	0.0875274	UP
Dip2b	-2.4298	0.00145179	0.0875274	DOWN
Vav1	-1.3429	0.00145197	0.0875274	DOWN
Prune1	0.480604	0.0014564	0.0875274	UP
Atrn	0.446332	0.00146098	0.0875274	UP
Rnf130	-0.269058	0.0014681	0.0875475	DOWN
Clasp1	-1.0236	0.0014738	0.0875475	DOWN
Nudt7	-0.866476	0.00148166	0.0876429	DOWN
Psme1	-0.502545	0.0015099	0.0889143	DOWN
Evc	-1.00895	0.0015176	0.0889143	DOWN
Brip1	-0.898069	0.00152218	0.0889143	DOWN
Golga5	0.335325	0.00153114	0.0890665	UP
Nup160	-0.479318	0.00154588	0.0895524	DOWN
Usp42	0.539427	0.00156098	0.0900552	UP
Tbcel	-0.434074	0.00161447	0.0927593	DOWN
Efna5	1.01049	0.00162278	0.092856	UP
Zc3hav1	-0.331114	0.00163047	0.0929172	DOWN
Pnpla7	-1.06231	0.00170676	0.0968705	DOWN
Ctnnb1	-0.401454	0.00172993	0.0971517	DOWN
Armcx5	0.73043	0.00173247	0.0971517	UP
Tifa	-0.953693	0.00173537	0.0971517	DOWN
F10	-0.38654	0.00174009	0.0971517	DOWN
Slc25a20	0.692102	0.00174636	0.0971517	UP
Gpnmb	1.99776	0.00176273	0.097675	UP
Abca8a	-1.06274	0.00178449	0.0984912	DOWN
Limd2	-0.645258	0.00179305	0.0985757	DOWN
Magee1	-0.731846	0.00180138	0.0986464	DOWN
Chrm3	-1.67761	0.00180898	0.0986775	DOWN
Ctns	-0.366224	0.00181992	0.0988896	DOWN
Atf5	0.711024	0.00184858	0.100059	UP
Foxk1	-0.41606	0.00188734	0.101551	DOWN
Acss3	1.10301	0.00189064	0.101551	UP
Fggy	-0.424296	0.00191567	0.102503	DOWN
Fgf21	3.07144	0.00192469	0.102543	UP
Zfp867	-0.510792	0.00193104	0.102543	DOWN
Abca5	0.64212	0.00196251	0.103821	UP
Cyb5r3	-0.459493	0.00198744	0.104139	DOWN
Gm20075	1.97797	0.00199063	0.104139	UP
Exosc2	0.372891	0.00199082	0.104139	UP
Esrrb	-1.41303	0.00199904	0.104181	DOWN
Lgals4	1.15333	0.00201514	0.10463	UP
Oit3	-0.890091	0.00205094	0.105964	DOWN
Ranbp2	0.29622	0.00205593	0.105964	UP
Kpna2	0.465853	0.00209211	0.106144	UP
Chrna2	1.50059	0.00209288	0.106144	UP
Cryzl1	0.387239	0.00209523	0.106144	UP
Myl9	-1.01945	0.00209814	0.106144	DOWN
Map4	-0.500349	0.00210789	0.106144	DOWN
Ndufaf6	-0.606802	0.0021094	0.106144	DOWN
Nudt18	0.755286	0.00211244	0.106144	UP
Smim24	-2.59224	0.00213555	0.106923	DOWN
Dmd	0.645503	0.00214885	0.107105	UP
Eif2b3	0.503332	0.00215447	0.107105	UP
Rnaseh2c	-0.58151	0.00218196	0.108088	DOWN
Rarb	-1.70712	0.00219005	0.108107	DOWN
Ciz1	-0.398071	0.00226559	0.111443	DOWN
Olfr907	2.06098	0.00227978	0.111749	UP
Siva1	-0.602806	0.00233098	0.113741	DOWN
Mindy2	-0.446821	0.00233664	0.113741	DOWN
Bbs4	0.787332	0.00236356	0.114419	UP
Zhx2	-0.438976	0.00236691	0.114419	DOWN
Dbf4	-0.829884	0.00239651	0.115452	DOWN
Gstp1	-0.527896	0.00242587	0.116123	DOWN
Pla2g7	0.997501	0.002427	0.116123	UP
Gnl2	0.39637	0.00244652	0.116659	UP
Plce1	-0.646961	0.00247012	0.1169	DOWN
Slc26a11	-0.617794	0.00247499	0.1169	DOWN
Etfdh	0.631985	0.0024766	0.1169	UP
Dnttip1	-0.371865	0.00249066	0.11717	DOWN
Barx2	1.63997	0.00251134	0.117289	UP
Prox1	0.630077	0.00251548	0.117289	UP
Clec2h	-1.77334	0.00252592	0.117289	DOWN
Gmps	0.317714	0.00252665	0.117289	UP
Api5	0.213854	0.00255168	0.117743	UP
Cidec	1.8346	0.00255323	0.117743	UP
Cpeb1	-0.751836	0.00257184	0.118212	DOWN
Gm20604	0.679345	0.00259096	0.118701	UP
Tuba1b	-0.841066	0.00261728	0.119517	DOWN
Gmpr	-1.5748	0.00263671	0.120013	DOWN
Leprot	-0.475626	0.0026586	0.120521	DOWN
Hbs1l	-0.239918	0.00266507	0.120521	DOWN
Scn4b	2.70468	0.00267706	0.120665	UP
Gas6	-0.788884	0.00268547	0.120665	DOWN
Meox1	-3.19989	0.00270603	0.121201	DOWN
Ntf3	1.1353	0.00271525	0.121226	UP
Arhgef6	-1.81111	0.0027329	0.121456	DOWN
Adora1	0.979924	0.00274392	0.121456	UP
Abcc6	-0.387854	0.0027533	0.121456	DOWN
Tiam1	-3.43503	0.00275504	0.121456	DOWN
Aes	-0.348276	0.00277222	0.12183	DOWN
Snx11	0.58171	0.0027977	0.122566	UP
Nagpa	-0.49848	0.00282695	0.123461	DOWN
Gm826	0.996262	0.00285464	0.124153	UP
Wdr6	-0.735746	0.00286051	0.124153	DOWN
Phospho1	1.06098	0.00287809	0.124531	UP
Tcta	0.581858	0.00291779	0.125196	UP
Gtf2e1	0.430787	0.00291964	0.125196	UP
Ptprn	3.07209	0.00292027	0.125196	UP
Retreg2	-0.343909	0.00297054	0.126963	DOWN
Rbm33	-0.444518	0.00300467	0.127786	DOWN
Ifitm3	-0.509926	0.00300891	0.127786	DOWN
Tmem268	0.763228	0.00301714	0.127786	UP
Slc22a30	-1.0505	0.00303611	0.128203	DOWN
Olfr1129	1.49523	0.00309058	0.129773	UP
2510009E07Rik	-0.561621	0.00309181	0.129773	DOWN
Cpd	0.289054	0.00310656	0.130003	UP
Fbxo11	1.31851	0.00313485	0.130796	UP
Sqor	-0.478604	0.00315448	0.131224	DOWN
Pik3r3	0.922978	0.00322275	0.131602	UP
Hsdl2	0.585338	0.00322315	0.131602	UP
Ift46	-0.333955	0.00322376	0.131602	DOWN
Kdelc2	-0.453981	0.00322901	0.131602	DOWN
Golt1b	0.681169	0.00322995	0.131602	UP
Rps6kl1	0.806535	0.0032378	0.131602	UP
Uhrf1bp1l	0.389874	0.00324257	0.131602	UP
Pkd2l2	0.714318	0.00327509	0.131602	UP
Mosmo	0.335189	0.00328007	0.131602	UP
Spata5	0.639111	0.00329209	0.131602	UP
Inafm2	0.478052	0.00329489	0.131602	UP
Fndc1	-3.18087	0.00330255	0.131602	DOWN
Rims4	-3.09138	0.00330462	0.131602	DOWN
Cyp4a10	2.48661	0.0033115	0.131602	UP
Tarbp2	-0.431064	0.00331291	0.131602	DOWN
Eif4ebp2	-0.30653	0.00331649	0.131602	DOWN
Zbp1	-0.73081	0.00332552	0.131602	DOWN
Bphl	-0.396893	0.00333814	0.131602	DOWN
Caprin2	-1.56992	0.00336262	0.131602	DOWN
Zfp566	1.8017	0.00337055	0.131602	UP
Tceal8	0.552391	0.00337594	0.131602	UP
Lpcat1	-4.91848	0.00337704	0.131602	DOWN
Vsig10l	1.17625	0.00339185	0.131602	UP
Bach2	-0.982784	0.00339725	0.131602	DOWN
Mcm5	-1.36284	0.00339823	0.131602	DOWN
Gm45716	0.89308	0.0034351	0.132663	UP
Cd34	-0.994014	0.00347346	0.133776	DOWN
Tmem150a	-0.426009	0.00348516	0.133859	DOWN
Aamdc	-0.433548	0.0035128	0.134313	DOWN
Selenok	0.55532	0.00351615	0.134313	UP
Tsc2	-0.341151	0.00352865	0.134424	DOWN
Serf2	-0.301981	0.00354014	0.134496	DOWN
Serinc1	0.312667	0.0035569	0.134496	UP
Pole3	-0.31985	0.00356779	0.134496	DOWN
P2rx7	-1.60503	0.00356891	0.134496	DOWN
Rfk	0.356455	0.0036083	0.135384	UP
Mfsd4b4	0.574416	0.00361178	0.135384	UP
Arpc1b	-0.436762	0.00364043	0.135394	DOWN
Tfrc	1.36388	0.00364601	0.135394	UP
Ube2v2	0.373978	0.00364829	0.135394	UP
Ciao2b	-0.590043	0.00365069	0.135394	DOWN
Poc5	-0.499495	0.00366188	0.135451	DOWN
Ndufs8	-0.437637	0.00367176	0.135459	DOWN
Polr3c	-0.351886	0.00368378	0.135546	DOWN
Asb2	-1.50466	0.0037113	0.136199	DOWN
Akirin1	0.342594	0.00372097	0.136199	UP
Abcb11	-1.00201	0.00376574	0.136994	DOWN
Fam229b	1.67569	0.00376642	0.136994	UP
Myl6	-0.321221	0.003772	0.136994	DOWN
Tcp11l2	-0.655757	0.00390044	0.141286	DOWN
Slc4a4	0.556944	0.00391034	0.141286	UP
Shisa4	-3.42123	0.00393992	0.141989	DOWN
Cdnf	0.899458	0.0039859	0.143067	UP
Yrdc	0.550725	0.00399025	0.143067	UP
Tmed5	0.766389	0.00409047	0.146287	UP
Spata24	0.994049	0.00412404	0.146616	UP
Gm4070	-1.30679	0.00413264	0.146616	DOWN
Serinc3	0.429267	0.00413867	0.146616	UP
Card10	-0.728937	0.00414751	0.146616	DOWN
Dcaf5	0.228232	0.00415408	0.146616	UP
Spats2l	-1.08467	0.00416244	0.146616	DOWN
Tm7sf2	-0.810107	0.00418463	0.147028	DOWN
Hist3h2a	-0.959109	0.00425009	0.148955	DOWN
Tmem189	0.598288	0.00428438	0.149782	UP
Usp36	-0.512569	0.00431867	0.150134	DOWN
Ncoa5	0.434822	0.00432575	0.150134	UP
Tmem47	0.691766	0.00432657	0.150134	UP
Slco3a1	-0.725991	0.00436886	0.151199	DOWN
Wdsub1	-0.595048	0.00437882	0.151199	DOWN
Phf12	0.32101	0.00441618	0.151684	UP
Runx1t1	1.62578	0.00441793	0.151684	UP
Arhgef9	0.672428	0.00443049	0.151684	UP
Dnajc1	0.288471	0.00443616	0.151684	UP
Praf2	-0.821069	0.00446285	0.152226	DOWN
Plin5	0.862397	0.00448376	0.152568	UP
Timm44	-0.405027	0.00452865	0.153297	DOWN
Robo4	-0.911064	0.0045342	0.153297	DOWN
Eml2	-0.548094	0.00453799	0.153297	DOWN
Rab8b	-0.698911	0.00457676	0.153863	DOWN
Rdh5	-0.343435	0.00458297	0.153863	DOWN
Mtmr4	0.458562	0.00458972	0.153863	UP
Vapb	-0.235252	0.00460929	0.153863	DOWN
Ifnar2	-0.322049	0.00461752	0.153863	DOWN
Supt5	-0.514399	0.00462772	0.153863	DOWN
Tspan18	-1.51992	0.00463305	0.153863	DOWN
Gstm4	-0.540649	0.00464562	0.153863	DOWN
Abcb4	0.31623	0.00466091	0.153863	UP
Ptgr1	-0.904332	0.00466452	0.153863	DOWN
Gm17018	-0.454533	0.0046909	0.154274	DOWN
Fcamr	2.38472	0.00469899	0.154274	UP
H2afv	-0.373292	0.00472515	0.15451	DOWN
Gvin1	-1.07961	0.00472821	0.15451	DOWN
Pcdh17	-1.2805	0.00475574	0.155048	DOWN
Dnajb4	0.547446	0.00477431	0.155292	UP
Lag3	1.05545	0.00481769	0.156341	UP
Rnf31	-0.412107	0.0048623	0.157424	DOWN
Nsun4	-0.407286	0.00490911	0.158287	DOWN
Pacs1	-0.577187	0.00491152	0.158287	DOWN
Mars2	0.49525	0.00498727	0.160359	UP
Hsd17b10	0.717742	0.00500387	0.16044	UP
Cenpq	-0.683921	0.00502331	0.16044	DOWN
Cxcl9	-1.2445	0.00502411	0.16044	DOWN
Abcg1	-0.915417	0.00504485	0.160736	DOWN
Acbd5	0.305076	0.00505722	0.160765	UP
Fgfr1	-0.853991	0.00511389	0.162198	DOWN
Kars	-0.240097	0.00515087	0.162843	DOWN
Btbd2	-0.540526	0.00516772	0.162843	DOWN
Pabpn1	0.434723	0.00517417	0.162843	UP
Acss2	-0.874718	0.0051807	0.162843	DOWN
1810055G02Rik	0.824665	0.00520833	0.163346	UP
Rnps1	0.580903	0.00523971	0.163963	UP
Dedd	-0.357485	0.0053458	0.16691	DOWN
Smoc2	0.808344	0.00538851	0.16787	UP
Dvl3	4.71328	0.0054234	0.168582	UP
Cntnap1	1.22788	0.00546771	0.169278	UP
Calm1	0.340696	0.00548346	0.169278	UP
Actn1	-0.679203	0.0054966	0.169278	DOWN
Mdm1	1.29139	0.0055116	0.169278	UP
Trim30a	-0.659658	0.00552258	0.169278	DOWN
Rnf145	-0.527674	0.00553109	0.169278	DOWN
Zbtb32	1.09137	0.00553465	0.169278	UP
Gckr	-0.467866	0.00554237	0.169278	DOWN
Mipep	-0.376993	0.00557645	0.169637	DOWN
Fmnl1	-1.99356	0.00558176	0.169637	DOWN
Tmem106a	-0.864828	0.00559043	0.169637	DOWN
Gm10643	1.00605	0.00562527	0.170325	UP
Pfkp	-1.18535	0.00563909	0.170376	DOWN
Eif4e	0.286045	0.00566863	0.170744	UP
Hadhb	0.556571	0.00567562	0.170744	UP
Lcp2	-1.11153	0.0057174	0.171384	DOWN
Klhl31	1.51901	0.00572581	0.171384	UP
Rab4a	0.358702	0.00573359	0.171384	UP
Galns	-0.544129	0.00576211	0.171553	DOWN
Ltbp4	-0.727269	0.00576879	0.171553	DOWN
Eml1	-1.31971	0.00577595	0.171553	DOWN
Itgal	-1.0626	0.00579065	0.171626	DOWN
Vmn1r1	2.15612	0.00579911		UP
Gemin2	0.409605	0.00591171	0.174322	UP
4932438A13Rik	0.393157	0.00591564	0.174322	UP
Ebpl	-0.370084	0.00592153	0.174322	DOWN
Pter	-0.565108	0.00593134	0.174322	DOWN
Cds2	-0.474824	0.00599556	0.17584	DOWN
Gm11808	-0.48457	0.00602128	0.175924	DOWN
Habp2	-0.506943	0.00602351	0.175924	DOWN
Fes	-1.08048	0.00606112	0.176655	DOWN
Pcolce	-0.758844	0.00608552	0.176842	DOWN
Hnrnph3	-0.731602	0.00609277	0.176842	DOWN
Chrna4	-2.48796	0.00611583		DOWN
Tspan7	-0.617266	0.00624092	0.180462	DOWN
Ubr2	-0.384335	0.00624324	0.180462	DOWN
Amer2	-3.11547	0.00624841		DOWN
Dnaic1	-2.2936	0.00626455	0.180503	DOWN
Nudt3	-2.73291	0.00627963	0.180503	DOWN
Bhlhe41	-1.22165	0.00629532	0.180503	DOWN
Wdr89	0.674053	0.00630191	0.180503	UP
Man1b1	-0.247465	0.00630904	0.180503	DOWN
Plekhg5	-0.572666	0.00633674	0.180926	DOWN
Etaa1	-0.57258	0.00648551	0.184797	DOWN
Irf8	-0.693735	0.00651114	0.185152	DOWN
Dalrd3	-0.541652	0.00661549	0.187738	DOWN
C8b	-0.375541	0.00665126	0.188172	DOWN
Gtf2a1	0.307631	0.00665762	0.188172	UP
Dyrk1b	-0.590909	0.00667745	0.188352	DOWN
Gpr146	-0.621137	0.00669223	0.18839	DOWN
A930018P22Rik	2.17989	0.00671497		UP
Rgl2	0.426391	0.00671856	0.18841	UP
Mapkapk3	-0.740071	0.00673867	0.18841	DOWN
Sec63	0.236396	0.00674541	0.18841	UP
Arl1	0.246269	0.0067483	0.18841	UP
Dnajc27	-0.949042	0.00677256	0.18841	DOWN
Clta	-0.26378	0.00677718	0.18841	DOWN
Lsm6	-0.250119	0.00680772	0.18841	DOWN
Cdip1	0.390803	0.00681029	0.18841	UP
Ralgapb	0.370985	0.00681494	0.18841	UP
Cspg5	-1.23288	0.00683298	0.18841	DOWN
Vegfb	-0.657086	0.00685253	0.18841	DOWN
Unc93b1	-0.483069	0.00685421	0.18841	DOWN
Ppp3r1	0.244975	0.00689938	0.189281	UP
Mogat1	2.17945	0.00702008	0.192215	UP
Crcp	0.392432	0.00704321	0.192215	UP
Hdac3	-0.277347	0.00704748	0.192215	DOWN
Mlxip	-1.01174	0.00711173	0.193419	DOWN
Gbp3	-0.883794	0.00711922	0.193419	DOWN
Pcdh9	3.10728	0.00714544	0.193754	UP
Pygb	-0.709183	0.00717091	0.193754	DOWN
Med7	0.353084	0.00717301	0.193754	UP
Siah1a	0.37269	0.00720144	0.19395	UP
Cfap298	3.23277	0.00720792	0.19395	UP
Kctd17	0.760343	0.00729584	0.194991	UP
Zfp326	0.545577	0.00729716	0.194991	UP
Mbtps1	-0.297512	0.00729962	0.194991	DOWN
Map3k12	-2.51564	0.00730225	0.194991	DOWN
Cyp3a41a	-20.7609	0.00730904		DOWN
Olfr943	3.23438	0.00733432		UP
Bach1	-0.55184	0.00734498	0.195398	DOWN
Blcap	0.49147	0.00735041	0.195398	UP
Pilrb2	-1.74153	0.0073593	0.195398	DOWN
Naa38	-0.560424	0.00740617	0.196035	DOWN
Clec4g	-0.593474	0.00741128	0.196035	DOWN
Eva1c	1.62847	0.00742654	0.196069	UP
Nom1	0.24961	0.00746552	0.196728	UP
Gm2a	-0.559504	0.00756138	0.19862	DOWN
Zfp641	1.66386	0.00756922	0.19862	UP
Fbxl22	1.79125	0.00757985	0.19862	UP
Ergic3	-0.415368	0.00765212	0.20014	DOWN
Lrp11	0.746981	0.0077092	0.201121	UP
Zfp131	0.322219	0.00771925	0.201121	UP
Exosc1	0.368084	0.00773267	0.201121	UP
Ntmt1	0.768123	0.00777171	0.201762	UP
Rag2	1.07555	0.00779667	0.202036	UP
Ptbp2	0.463264	0.00787543	0.203205	UP
Cgref1	1.41368	0.0078827	0.203205	UP
Polr3e	0.315564	0.00788525	0.203205	UP
Slc2a4	-2.08039	0.00806326	0.207411	DOWN
Mrpl42	-0.365553	0.00810302	0.207567	DOWN
Ccdc152	0.915487	0.00810647	0.207567	UP
Abca2	-1.00778	0.00811377	0.207567	DOWN
Ublcp1	0.358195	0.00814583	0.207798	UP
Jph2	2.63171	0.00815244	0.207798	UP
Dctn5	-0.235101	0.0081924	0.208438	DOWN
Dnal4	-2.72684	0.00825773	0.209637	DOWN
Psmb7	-0.309169	0.00827711	0.209637	DOWN
Nsmaf	-0.355651	0.00828439	0.209637	DOWN
Cdc123	0.356589	0.00831407	0.210009	UP
Chil1	1.79568	0.00833608	0.210186	UP
Atp10a	-1.51751	0.00837381	0.210758	DOWN
Fbxo40	-1.16288	0.00848793	0.212664	DOWN
Rida	-0.412432	0.00851434	0.212664	DOWN
Sdf2	-0.357369	0.00852354	0.212664	DOWN
Triqk	-2.76654	0.00852594	0.212664	DOWN
Mrpl17	0.385587	0.00856191	0.212664	UP
Cd59b	-0.702171	0.00856281	0.212664	DOWN
Chrne	-2.87929	0.00856862	0.212664	DOWN
Chpf2	0.504965	0.00857089	0.212664	UP
Tsen2	0.463122	0.00862564	0.213645	UP
Fdx1	-0.567836	0.00866704	0.213928	DOWN
Pomgnt1	-0.321987	0.00866758	0.213928	DOWN
Pigu	0.261563	0.00868312	0.213934	UP
Pdf	-0.345659	0.00871593	0.214366	DOWN
Gngt2	-0.818144	0.00878727	0.215742	DOWN
Fbp2	2.827	0.0088044	0.215785	UP
Dis3l	-0.386722	0.00883457	0.216146	DOWN
Zfp454	-1.26854	0.00889597	0.217038	DOWN
Polr2c	-0.306897	0.0089074	0.217038	DOWN
Kri1	0.377138	0.00891747	0.217038	UP
Agxt	-0.492993	0.00899326	0.218142	DOWN
Arsg	0.6491	0.00901878	0.218142	UP
Kpna1	0.253087	0.00902737	0.218142	UP
Tmsb4x	-0.635011	0.00905184	0.218142	DOWN
E2f1	-1.08611	0.0090559	0.218142	DOWN
Ddx23	-0.260238	0.0090656	0.218142	DOWN
Bhmt2	0.492802	0.00907173	0.218142	UP
Gm20388	0.792934	0.00909704	0.218376	UP
Fastkd2	-0.941022	0.00915556	0.219405	DOWN
A530016L24Rik	2.9105	0.00928002	0.222008	UP
Nanos1	2.9209	0.00930879		UP
Esco2	-2.74256	0.00930907		DOWN
Evc2	-0.884196	0.00934151	0.223061	DOWN
Fyb	-1.19162	0.00935586	0.223061	DOWN
Hoxb1	2.87133	0.00936288		UP
Ireb2	-0.318124	0.00939801	0.223546	DOWN
Tril	-2.41666	0.00943914	0.223546	DOWN
Tmem38a	0.503647	0.00944385	0.223546	UP
Yod1	0.505967	0.00945653	0.223546	UP
Tcf19	-0.79216	0.0094669	0.223546	DOWN
Acadm	0.626141	0.0094719	0.223546	UP
Luc7l3	0.490324	0.00952968	0.224532	UP
Hbp1	-0.267781	0.00957059	0.225118	DOWN
Xrcc4	0.419967	0.00960884	0.225604	UP
Gpr137	0.410554	0.00962344	0.225604	UP
Gm4767	3.98714	0.00970634	0.227167	UP
Depdc5	-0.500405	0.00973257	0.227402	DOWN
Ggcx	-0.379033	0.00977813	0.227789	DOWN
Map3k6	-1.31647	0.00978164	0.227789	DOWN
Camta2	0.591702	0.00980286	0.22782	UP
Actn4	0.441355	0.00981547	0.22782	UP
Opn1sw	-2.96363	0.00988595		DOWN
March6	0.29744	0.00992024	0.229323	UP
Shtn1	0.437912	0.00992615	0.229323	UP
Prc1	-2.04655	0.00994574	0.229323	DOWN
Ufd1	0.356987	0.0100166	0.229323	UP
Aspn	-2.90311	0.0100352	0.229323	DOWN
Zbtb37	0.549534	0.0100376	0.229323	UP
Tmed2	0.382865	0.0100439	0.229323	UP
Adnp2	-0.511863	0.010049	0.229323	DOWN
Utp18	0.388994	0.0100495	0.229323	UP
Pak1	-2.28065	0.0100545	0.229323	DOWN
Uqcc1	2.65379	0.0100602	0.229323	UP
H2-T22	-0.464258	0.0100918	0.22967	DOWN
H2-T23	-0.391994	0.0101687	0.231046	DOWN
Slc46a3	-0.703542	0.0102126	0.231259	DOWN
Mycbp	0.360453	0.0102363	0.231259	UP
Mgll	0.701174	0.0102399	0.231259	UP
Bmp4	-0.723534	0.0102441	0.231259	DOWN
Sp110	-1.43043	0.0102831	0.231766	DOWN
Tmem218	-0.678049	0.0103516	0.232413	DOWN
Qrsl1	0.496396	0.0103816	0.232413	UP
Spryd4	0.284597	0.010387	0.232413	UP
Zfp526	-0.732266	0.0103946	0.232413	DOWN
Flcn	-0.601528	0.0104041	0.232413	DOWN
Rtf2	0.452475	0.0104171	0.232413	UP
Mtmr3	-0.284018	0.0104279	0.232413	DOWN
Tgfbrap1	0.232836	0.0104495	0.232526	UP
Sh3kbp1	-1.389	0.0104886	0.23291	DOWN
Oas1g	-4.06011	0.0104906		DOWN
Cpq	-0.383728	0.0105	0.23291	DOWN
Sfpq	0.43202	0.0105176	0.232933	UP
Spa17	1.2443	0.0105386	0.23303	UP
E2f3	0.403837	0.0105819	0.233495	UP
Acot13	-0.334744	0.010593	0.233495	DOWN
Fam131a	-2.81788	0.0106463	0.234302	DOWN
Noct	0.446196	0.0107002	0.235119	UP
Rad54b	1.66453	0.0107546		UP
A1bg	-2.42699	0.0107561	0.235642	DOWN
Acsl6	-1.35831	0.0107732	0.235642	DOWN
Dgkz	-1.07901	0.0107744	0.235642	DOWN
Hnrnpk	0.281834	0.0108868	0.23773	UP
Pja2	0.264389	0.0109155	0.237748	UP
Wscd1	-2.39099	0.0109216	0.237748	DOWN
Trappc8	-2.05637	0.0109469	0.23788	DOWN
Usf1	-0.363792	0.0109616	0.23788	DOWN
Top1	0.338959	0.0110134	0.23836	UP
Mef2d	0.333189	0.0110177	0.23836	UP
Aard	-1.45148	0.0110342		DOWN
Setdb2	-1.35334	0.0110531	0.238756	DOWN
Knstrn	-2.1818	0.0111379	0.240219	DOWN
Irf5	-0.83624	0.0111626	0.240359	DOWN
Sertm1	2.40519	0.011181		UP
Zfp207	0.260257	0.0112	0.240359	UP
Get4	0.327147	0.0112267	0.240359	UP
Ifi27	-0.747355	0.0112434	0.240359	DOWN
Dpep2	2.52161	0.0112738	0.240359	UP
Tbck	0.325037	0.0113106	0.240359	UP
Sumo1	-0.219136	0.0113287	0.240359	DOWN
Tmem263	0.541778	0.0113608	0.240359	UP
Rnd2	0.579821	0.011362	0.240359	UP
Slain2	0.289064	0.0113645	0.240359	UP
Cdadc1	-0.332182	0.0113899	0.240359	DOWN
Peg3	0.995829	0.0113997	0.240359	UP
Csnk1g3	0.281397	0.0114101	0.240359	UP
Apom	-0.381986	0.0114244	0.240359	DOWN
Lars	0.26792	0.0114319	0.240359	UP
Raf1	-0.273163	0.0114419	0.240359	DOWN
Gbp10	-1.69905	0.0114423	0.240359	DOWN
Cyp2c55	-2.03974	0.011453	0.240359	DOWN
Tmem14a	-0.808882	0.011505	0.24109	DOWN
Fam149b	-0.36065	0.0115517	0.241285	DOWN
Arhgap31	-0.550341	0.011565	0.241285	DOWN
Tti1	-0.352931	0.011566	0.241285	DOWN
Peli3	-0.914633	0.0116084	0.241811	DOWN
Chmp1b	0.252986	0.0116463	0.242239	UP
Gch1	-0.509314	0.0117248	0.243234	DOWN
Abhd16a	-0.331919	0.0117288	0.243234	DOWN
Fam83c	1.43014	0.0118116		UP
Catsper2	0.860882	0.0118119	0.244595	UP
Rps21	-0.413712	0.0119319	0.246349	DOWN
Rnf19a	0.366759	0.0119628	0.246349	UP
Tyrobp	-0.845305	0.0119651	0.246349	DOWN
Rad23b	0.193973	0.0119669	0.246349	UP
Olfr695	-3.50695	0.0119704		DOWN
Ap5b1	0.587915	0.0120326	0.247098	UP
Impad1	0.279862	0.0120426	0.247098	UP
Tmem242	-0.271025	0.0120561	0.247098	DOWN
Def8	0.379678	0.0121515	0.248689	UP
Ppp1r37	-0.401584	0.0122156	0.249354	DOWN
Daam1	-0.40322	0.0122196	0.249354	DOWN
Tlr2	-1.00604	0.0122377	0.249361	DOWN
Gm12789	3.06368	0.0122526		UP
Prpf40a	0.281773	0.0122663	0.24958	UP
Coro1b	-0.391689	0.0122926	0.249754	DOWN
Psmb11	2.46615	0.0123552		UP
Comt	-0.733426	0.0124025	0.251621	DOWN
Slc7a3	-3.17279	0.0124466		DOWN
Ccnk	-0.267316	0.0124955	0.253039	DOWN
Nid2	-0.89705	0.012519	0.253039	DOWN
Rgs2	-1.59472	0.0125265	0.253039	DOWN
Palld	0.56625	0.0125945	0.25388	UP
Plaur	-3.08891	0.012605	0.25388	DOWN
Ppef1	2.86295	0.0126124		UP
Mmp17	-1.48185	0.0126225	0.25388	DOWN
Papss2	-0.734773	0.0128166	0.257226	DOWN
Pltp	-0.684113	0.0128303	0.257226	DOWN
Kansl1l	-0.57333	0.0128439	0.257226	DOWN
Vcpkmt	-0.754041	0.0128964	0.257909	DOWN
Foxo4	-0.31925	0.0129561	0.258372	DOWN
Mgme1	-0.624957	0.0129564	0.258372	DOWN
Zfp972	1.02631	0.0130678	0.259051	UP
Srgap1	-2.03508	0.0131042	0.259051	DOWN
Nbeal1	0.325756	0.0131044	0.259051	UP
Cdk16	-0.237707	0.0131087	0.259051	DOWN
Parp14	-0.523629	0.0131353	0.259051	DOWN
Gm36210	2.86536	0.0131417	0.259051	UP
Mlxipl	-0.700574	0.0131426	0.259051	DOWN
Tctex1d2	0.740663	0.0131521	0.259051	UP
Anapc11	-0.339762	0.0131567	0.259051	DOWN
Aldh4a1	-0.487702	0.0131902	0.259346	DOWN
Lrtm1	1.03293	0.0132477	0.259867	UP
Ereg	2.02936	0.0132538	0.259867	UP
Abhd14a	-0.381243	0.0132865	0.260145	DOWN
Htra1	-1.79242	0.0133163	0.260153	DOWN
Aqp1	-0.623137	0.0133241	0.260153	DOWN
Kifap3	0.405589	0.0133598	0.260488	UP
Itgb6	2.70488	0.0133884	0.260683	UP
Txn1	-0.295456	0.0134108	0.260756	DOWN
Usp16	0.402453	0.0134747	0.261638	UP
Flt4	-0.790001	0.0135171	0.261762	DOWN
Kif7	-1.51796	0.0135265	0.261762	DOWN
Ecscr	-0.923398	0.0135372	0.261762	DOWN
D10Wsu102e	0.390576	0.0136092	0.262793	UP
Sgcg	-2.49156	0.0137186	0.264113	DOWN
Fnbp1	-0.36024	0.0137357	0.264113	DOWN
Lst1	-1.06941	0.0137863	0.264113	DOWN
Pbx1	0.374195	0.0137881	0.264113	UP
Mmp14	0.675861	0.0137966	0.264113	UP
Cyp4b1	-0.941322	0.0138175	0.264113	DOWN
Rcn3	-0.64688	0.0138403	0.264113	DOWN
Dlg3	-4.14485	0.0138458	0.264113	DOWN
Ccnd2	-0.775223	0.0138472	0.264113	DOWN
Myct1	-1.02638	0.0138705	0.264198	DOWN
Dhx38	-0.362417	0.0139103	0.264598	DOWN
Bank1	-1.2893	0.0139718		DOWN
Mitf	0.704692	0.0139945	0.265839	UP
Metrn	-0.639043	0.0140994	0.267081	DOWN
Eci2	0.441741	0.0141081	0.267081	UP
Sh2b2	-1.29114	0.0141327	0.267081	DOWN
Edem3	0.368814	0.0141366	0.267081	UP
Taf3	0.397014	0.0141662	0.267081	UP
Clec4f	-0.799437	0.0141795	0.267081	DOWN
Baiap2	0.665429	0.0141933	0.267081	UP
Sult1b1	0.683725	0.0142161	0.267153	UP
Acbd3	0.361162	0.014284	0.267751	UP
Naa50	0.298865	0.0142861	0.267751	UP
Atp6ap2	0.241213	0.0143394	0.267903	UP
Dnmt1	-0.428131	0.0143501	0.267903	DOWN
Fry	0.803598	0.0143516	0.267903	UP
Slc25a4	-0.451971	0.0143751	0.267984	DOWN
Lig4	0.438329	0.0144017	0.268124	UP
Dusp4	-1.3762	0.014431	0.268313	DOWN
Ramp2	-1.04523	0.0144793	0.268675	DOWN
Pgm2l1	-0.952046	0.0144888	0.268675	DOWN
Necap1	0.207303	0.01452	0.268769	UP
Cyp3a13	0.481503	0.0145322	0.268769	UP
B3gntl1	0.575251	0.0146075	0.269805	UP
Clec14a	-0.703058	0.0146347	0.269953	DOWN
Cpsf6	0.341055	0.0149191	0.274837	UP
Hist1h4h	-0.889058	0.0149832	0.275656	DOWN
Csnk2a2	-0.236126	0.0150114	0.275756	DOWN
4930539E08Rik	1.31104	0.0150464	0.275756	UP
Wnt5b	0.635156	0.0150561	0.275756	UP
Hmgcl	0.352156	0.0150673	0.275756	UP
Cd180	-1.44946	0.0151288	0.276519	DOWN
Agpat3	0.289076	0.0151843	0.276962	UP
Bckdk	0.367259	0.015206	0.276962	UP
Ttll11	2.65718	0.0152123	0.276962	UP
Ccdc86	0.48118	0.0152866	0.277417	UP
Top2a	-1.73289	0.0152868	0.277417	DOWN
Slc22a5	0.556732	0.0153013	0.277417	UP
Dram1	-3.76559	0.0153164	0.277417	DOWN
Klhl25	0.533808	0.0153652	0.277751	UP
Cpt2	0.558966	0.0153745	0.277751	UP
Bod1	-0.218734	0.0154266	0.277943	DOWN
Rfc3	-0.729639	0.01543	0.277943	DOWN
Dcun1d4	0.300397	0.0154446	0.277943	UP
Paip1	0.221591	0.0154988	0.278562	UP
Nol3	-0.663511	0.0155632	0.27936	DOWN
Pla2g12a	0.432437	0.0156018	0.279383	UP
Xlr4a	-5.52527	0.0156043	0.279383	DOWN
Ccdc137	0.404891	0.0156688	0.280082	UP
Gnaz	1.76975	0.0156875	0.280082	UP
Slc15a5	1.19346	0.0157033	0.280082	UP
Notum	-0.890036	0.0157585	0.28071	DOWN
Ccdc91	-0.240337	0.0157848	0.280719	DOWN
Celf2	0.622371	0.0157991	0.280719	UP
Vps26b	-0.235679	0.0158324	0.280955	DOWN
Cyp4a14	3.65315	0.0158997	0.281793	UP
Ifi206	-2.49474	0.0159066		DOWN
Efna2	-2.84897	0.0159289		DOWN
Itpa	0.318963	0.0159344	0.282051	UP
Dmpk	-0.750082	0.0159678	0.282286	DOWN
Smyd4	0.446201	0.015991	0.282341	UP
Zfp653	0.902304	0.0160162	0.282428	UP
Fer1l5	-1.45566	0.016039	0.282474	DOWN
Ofd1	0.543858	0.0160632	0.282474	UP
Zfp608	0.809867	0.0160794	0.282474	UP
Dnajb14	0.270857	0.0160993	0.282474	UP
Ubxn10	2.93683	0.0161277	0.282586	UP
Gm3055	1.7138	0.0161493	0.282586	UP
Capn3	-1.20763	0.0161662	0.282586	DOWN
Mgea5	-0.273973	0.0161871	0.282599	DOWN
Hmgcs2	0.910841	0.0162538	0.282958	UP
Zbtb39	-0.364415	0.0162654	0.282958	DOWN
Lman2l	-0.644117	0.0162749	0.282958	DOWN
Dbp	-1.25618	0.016306	0.282958	DOWN
Scn3b	-2.69357	0.0163086	0.282958	DOWN
Prpf18	-0.19188	0.0164322	0.284508	DOWN
Dnajc25	0.358299	0.0164385	0.284508	UP
Aqp8	-1.22839	0.0164728	0.28475	DOWN
Stk38	1.88579	0.0165129	0.285091	UP
Gstt1	-0.599056	0.0165397	0.285155	DOWN
Jph1	-0.65932	0.0165581	0.285155	DOWN
Agfg1	0.253901	0.0165822	0.285155	UP
Pcnt	-0.834947	0.016598	0.285155	DOWN
Arhgap26	-0.439267	0.0166271	0.285307	DOWN
Enpp4	0.299244	0.0167203	0.286178	UP
Hccs	0.359344	0.0167336	0.286178	UP
Arhgap12	-0.298219	0.0167392	0.286178	DOWN
Fbxl5	-0.337879	0.016825	0.286904	DOWN
Uggt2	-2.38877	0.0168284	0.286904	DOWN
Ccdc77	-0.68636	0.016843	0.286904	DOWN
Ctc1	-0.964296	0.017013	0.289447	DOWN
Ebp	-0.354054	0.0171466	0.291368	DOWN
Utp11	0.371071	0.0171983	0.291892	UP
Nisch	-0.219739	0.017277	0.292873	DOWN
Dpp7	-0.633473	0.0173561	0.293859	DOWN
Ptn	-2.82648	0.017461	0.29472	DOWN
Cyp8b1	0.782161	0.0174931	0.29472	UP
Ufl1	0.302715	0.0175061	0.29472	UP
Ifih1	-0.454187	0.017552	0.29472	DOWN
Kbtbd11	-1.76979	0.0175526	0.29472	DOWN
Ipp	-0.328606	0.0175951	0.29472	DOWN
Gabbr2	-0.837658	0.0175986	0.29472	DOWN
Slc12a6	-0.715113	0.0176265	0.29472	DOWN
Apbb1ip	-1.2486	0.0176308	0.29472	DOWN
Tmem14c	-0.270243	0.0176335	0.29472	DOWN
Stxbp1	-1.31109	0.0176443	0.29472	DOWN
Hsf1	-0.433562	0.0176592	0.29472	DOWN
Nrbf2	0.355367	0.0177521	0.295629	UP
Trp53inp2	0.60829	0.0177559	0.295629	UP
Exoc4	-0.386845	0.0178107	0.295854	DOWN
Rps12-ps3	-0.39546	0.0178116	0.295854	DOWN
Ccdc68	0.834359	0.0178521	0.295879	UP
Tcirg1	-0.678605	0.0178553	0.295879	DOWN
9530068E07Rik	-0.207732	0.0179638	0.297326	DOWN
Eci3	-3.08032	0.0180011	0.297592	DOWN
Src	0.866501	0.0180977	0.298836	UP
Lonrf1	-0.638356	0.0183509	0.30266	DOWN
Snrnp200	-0.295973	0.0184138	0.30327	DOWN
Pik3cg	1.57769	0.0184311	0.30327	UP
Slc22a18	-0.425789	0.0184727	0.303598	DOWN
Cd36	0.763482	0.0185225	0.30406	UP
Pinx1	0.677847	0.0185994	0.304631	UP
Dido1	0.399071	0.0186007	0.304631	UP
Rhbdl3	2.02875	0.0186495	0.305073	UP
Kdm3b	-0.53878	0.018737	0.306146	DOWN
Slfn8	-0.859804	0.0189151	0.307953	DOWN
Serpina3n	0.737257	0.0189423	0.307953	UP
Pank3	0.455705	0.0189647	0.307953	UP
Cnmd	-1.45771	0.0189791	0.307953	DOWN
Gm20721	2.05885	0.0190048	0.307953	UP
Pdcd2l	-0.304953	0.0190128	0.307953	DOWN
Tipin	0.38666	0.0190236	0.307953	UP
Npnt	1.32453	0.0190376	0.307953	UP
Svil	-0.66555	0.019066	0.307953	DOWN
Psen2	-0.547994	0.0190672	0.307953	DOWN
Gpr183	-2.48165	0.0191163	0.308273	DOWN
Tmem184c	0.360501	0.019131	0.308273	UP
Olfr784	0.75216	0.0192031	0.30908	UP
Zfp281	0.343505	0.0193164	0.310547	UP
Sdsl	0.711541	0.0193728	0.311097	UP
Fbxl17	0.350794	0.0194586	0.31209	UP
Mfsd14a	0.200247	0.0194876	0.31209	UP
Tcerg1	0.33044	0.0195015	0.31209	UP
Rbm17	-0.273689	0.0195273	0.312148	DOWN
Tada3	-0.430467	0.0196359	0.313485	DOWN
Gm26566	-2.8551	0.0196519		DOWN
Gdf11	-2.55862	0.0196557	0.313485	DOWN
Prr36	-1.70377	0.0196884		DOWN
Stk35	-0.338643	0.0197849	0.315179	DOWN
Lama4	-0.841899	0.0198069	0.315179	DOWN
Cnot8	-0.239698	0.0198708	0.315838	DOWN
Cep78	0.601545	0.0199681	0.316643	UP
Chid1	-0.471397	0.0199914	0.316643	DOWN
Rdx	-0.266075	0.019999	0.316643	DOWN
Ggps1	0.303611	0.0200335	0.316643	UP
Dhx58	-0.582664	0.0200729	0.316643	DOWN
Isg15	-0.687357	0.0200862	0.316643	DOWN
Trim23	0.291486	0.0200883	0.316643	UP
Spred2	-0.593692	0.0201222	0.316643	DOWN
Rapgef2	-0.414431	0.0201346	0.316643	DOWN
Prpf4b	0.32726	0.0201474	0.316643	UP
Pcgf2	0.688266	0.0202477	0.317863	UP
Ccar1	0.26538	0.0202863	0.318113	UP
Grrp1	-2.54555	0.0203104	0.318135	DOWN
Ccl19	-3.9355	0.0204213		DOWN
Gabarapl1	-0.496878	0.0204385	0.3197	DOWN
Arhgdib	-0.5371	0.0204559	0.3197	DOWN
Tm2d2	-0.238468	0.0204927	0.319919	DOWN
Gpx3	0.637802	0.0206162	0.321489	UP
Tll1	-2.57787	0.0208156	0.323976	DOWN
Arf4	0.486204	0.0208219	0.323976	UP
Smdt1	-0.311701	0.0208709	0.324379	DOWN
Pcmt1	0.219819	0.0209293	0.324469	UP
Slc22a15	0.443632	0.0209388	0.324469	UP
Mgp	-0.848374	0.0209462	0.324469	DOWN
Dhx29	0.389441	0.0210999	0.32649	UP
Tubb1	-2.87938	0.0211196		DOWN
Glrx	0.521373	0.0211251	0.326518	UP
Scyl2	0.361088	0.0212029	0.32736	UP
Acsl1	0.649982	0.021256	0.32782	UP
Gnai2	-0.292687	0.0213252	0.328526	DOWN
Apcs	0.853111	0.021395	0.329239	UP
Ccp110	0.667078	0.0214587	0.329778	UP
Nus1	0.288874	0.0214932	0.329778	UP
Tsc1	-0.45572	0.0215183	0.329778	DOWN
Tbxas1	-1.40747	0.0215242	0.329778	DOWN
Cap1	-0.247655	0.0215617	0.329805	DOWN
Snrpd2	-0.280487	0.0215729	0.329805	DOWN
Ubqln2	0.231194	0.0216034	0.329911	UP
Htra4	-1.16767	0.0216505	0.330024	DOWN
Egfr	-0.576447	0.0217275	0.330024	DOWN
Rsbn1	0.36286	0.0217417	0.330024	UP
Gxylt2	1.15775	0.0217596	0.330024	UP
Ube2d3	0.240482	0.0217779	0.330024	UP
Tbc1d13	-0.326641	0.0217794	0.330024	DOWN
Hs2st1	0.252471	0.0218313	0.330024	UP
Mmachc	0.298003	0.0218374	0.330024	UP
Pura	0.382395	0.0218442	0.330024	UP
Dach1	2.37597	0.0218462	0.330024	UP
Cltc	0.200512	0.0218939	0.33025	UP
Tjap1	-0.426061	0.0219428	0.33025	DOWN
Lmnb1	-0.54546	0.021978	0.33025	DOWN
Zkscan3	0.345509	0.0219972	0.33025	UP
Bbs2	0.546397	0.0219995	0.33025	UP
Ankib1	0.291132	0.0220025	0.33025	UP
Nemf	0.2221	0.0220881	0.330948	UP
Wdr78	-2.8897	0.0220962	0.330948	DOWN
Ifi204	-0.880667	0.0221347	0.331163	DOWN
Pxmp4	0.515749	0.0221578	0.331163	UP
Gm14419	1.0291	0.0221815	0.331163	UP
Spout1	-0.683713	0.0222427	0.331376	DOWN
Bard1	-2.02944	0.022243	0.331376	DOWN
Ephx2	0.664898	0.0222869	0.331678	UP
Tmem45a	-1.47272	0.0223454	0.332016	DOWN
Slc16a1	0.532449	0.022357	0.332016	UP
Hacd3	0.405305	0.0225841	0.334574	UP
Sept2	0.194623	0.0225906	0.334574	UP
Twf1	0.210469	0.0226009	0.334574	UP
Pcdhb7	-2.62621	0.0227199		DOWN
Tmem160	-0.631382	0.0227238	0.335781	DOWN
Rtn4rl2	-2.59259	0.0227345	0.335781	DOWN
Pcdhgb2	-2.57068	0.0227959	0.335781	DOWN
Dot1l	0.45975	0.0228134	0.335781	UP
Yy2	1.19086	0.0228184	0.335781	UP
Nlrp12	0.627706	0.0228614	0.335781	UP
Ahrr	-2.65039	0.0228672	0.335781	DOWN
Cnppd1	-0.296455	0.022874	0.335781	DOWN
Sept1	-2.12808	0.0229573	0.336305	DOWN
Tm9sf4	-0.262266	0.022978	0.336305	DOWN
Cilp	-2.72941	0.0229817	0.336305	DOWN
Lnx1	-0.766535	0.023032	0.336569	DOWN
Csf2ra	-0.764514	0.0230477	0.336569	DOWN
Rnf24	0.77144	0.0231313	0.337438	UP
Tmed4	0.364324	0.023205	0.33816	UP
Epha2	0.895182	0.0232439	0.338172	UP
Entpd1	-0.657114	0.0232543	0.338172	DOWN
Arhgap18	-0.751775	0.0232781	0.338172	DOWN
Cngb3	2.6389	0.0233685	0.339133	UP
Blvra	-0.419481	0.0234967	0.340576	DOWN
Atg9a	-0.256755	0.0235165	0.340576	DOWN
Hps3	0.516265	0.0235918	0.341315	UP
Leng8	0.375493	0.0236527	0.341843	UP
Slc4a2	-0.282884	0.0236885	0.342007	DOWN
Vwa8	0.443438	0.0237541	0.342602	UP
Reep1	-0.817212	0.0237951	0.34284	DOWN
Snrnp25	-0.4943	0.0238204	0.342853	DOWN
Borcs8	-0.483786	0.0239283	0.344052	DOWN
Mks1	0.705952	0.0239839	0.344391	UP
Tor1a	0.369688	0.024001	0.344391	UP
Ppil4	0.265771	0.0240941	0.345374	UP
Sh3d19	-0.357087	0.02418	0.346144	DOWN
Zfp963	0.456771	0.0241973	0.346144	UP
Dgcr2	-0.244907	0.0242796	0.346969	DOWN
Myo18a	-0.349674	0.0243425	0.347333	DOWN
Eif2d	-0.218317	0.0243547	0.347333	DOWN
Tmem199	0.42931	0.0244073	0.347729	UP
Ldlrad4	-0.585748	0.0244524	0.347988	DOWN
Zfp993	-1.85514	0.0244751	0.347988	DOWN
Gm5617	0.575564	0.0245077	0.348099	UP
Snrnp27	0.277677	0.0245503	0.348299	UP
Spon1	0.804616	0.0245715	0.348299	UP
Klhl36	-0.460812	0.0246902	0.349628	DOWN
Dnaja2	0.207122	0.0247256	0.349777	UP
Pak6	-1.81075	0.0247671	0.35001	DOWN
Dnah3	2.5007	0.0248247	0.350358	UP
Smarca2	-0.301601	0.0248804	0.350358	DOWN
Galnt11	-0.306678	0.0248841	0.350358	DOWN
Sephs1	0.262519	0.0248917	0.350358	UP
Psme2	-0.368547	0.0249221	0.350435	DOWN
Zfp72	0.64164	0.0249822	0.350928	UP
B9d1	-1.91319	0.0251332	0.352557	DOWN
Zbed3	0.539997	0.0251485	0.352557	UP
Nek7	0.314397	0.0252192	0.353191	UP
Purb	0.29036	0.0252518	0.353191	UP
Scmh1	-0.449566	0.0252971	0.353191	DOWN
Alkbh7	-0.414739	0.0253306	0.353191	DOWN
Dhrs3	-0.4926	0.0253348	0.353191	DOWN
Rpl39	-0.233104	0.0253613	0.353191	DOWN
Tyw1	-0.327209	0.0253701	0.353191	DOWN
Mrps21	-0.302007	0.0253988	0.35324	DOWN
Shld1	-0.658154	0.0254483	0.353438	DOWN
Eif2s2	0.191521	0.0254635	0.353438	UP
Prpf19	-0.321519	0.0255127	0.353452	DOWN
Eif2a	-0.493565	0.0255149	0.353452	DOWN
Yif1b	-0.363898	0.0255866	0.353863	DOWN
Mapk8ip3	0.379287	0.0255951	0.353863	UP
Chchd5	-0.433156	0.0256712	0.354566	DOWN
Mef2a	0.227299	0.0257736	0.35563	UP
Mindy4	-0.552784	0.0258052	0.355715	DOWN
Slco5a1	2.24945	0.0258644	0.356181	UP
Tra2b	0.36216	0.0258985	0.356302	UP
Anxa3	-0.735433	0.0259562	0.356745	DOWN
Lmo2	-0.598244	0.0260565	0.357773	DOWN
Vdac1	-0.288721	0.0261544	0.358144	DOWN
Tnfaip8l2	-0.972254	0.026155	0.358144	DOWN
Gatc	0.225922	0.026161	0.358144	UP
Rnaseh2a	-0.37716	0.0261956	0.358144	DOWN
Hdc	1.18804	0.0262112	0.358144	UP
Bmpr1a	0.259393	0.0263479	0.359661	UP
Gbe1	-0.523062	0.0264395	0.360349	DOWN
Traf3ip1	0.443879	0.0264602	0.360349	UP
Zfp275	-0.396716	0.0264755	0.360349	DOWN
Tbl1x	-0.313091	0.0265119	0.360494	DOWN
Grn	0.329652	0.0265729	0.360974	UP
Ints12	0.351604	0.0266591	0.3615	UP
Mrfap1	0.198163	0.0266835	0.3615	UP
Pm20d1	-0.359682	0.026689	0.3615	DOWN
Fam149a	-0.469221	0.026727	0.361666	DOWN
Gpr63	2.63392	0.026825		UP
Pitpnm2	-0.389724	0.0268407	0.362854	DOWN
Otud4	0.262604	0.0269839	0.363827	UP
Man2b1	-0.29358	0.0270037	0.363827	DOWN
Plin2	0.90525	0.0270114	0.363827	UP
Exoc5	0.242199	0.0270165	0.363827	UP
Pgam5	0.221499	0.027086	0.363842	UP
Trpc6	-0.857529	0.0270891	0.363842	DOWN
Ctcfl	0.998071	0.027104	0.363842	UP
Efna1	-0.619329	0.0271214	0.363842	DOWN
Terf2ip	0.214396	0.0271876	0.363932	UP
Mmadhc	0.325664	0.0271938	0.363932	UP
Sept10	-0.440648	0.0272299	0.363932	DOWN
Cebpd	0.841349	0.0272319	0.363932	UP
Cdc25b	-1.09597	0.027263	0.364	DOWN
P2ry1	-0.682465	0.0272908	0.364025	DOWN
Smim13	0.27499	0.0273893	0.364991	UP
Pop1	0.59224	0.027442	0.365345	UP
Kdm6b	0.447263	0.0275689	0.366372	UP
Ly6a	-0.50881	0.0275714	0.366372	DOWN
Pdzrn3	0.743259	0.0276149	0.366604	UP
Slco1a1	-0.91797	0.0277062	0.367467	DOWN
Rab34	0.562481	0.0277361	0.367516	UP
Cyp2j6	-0.375013	0.027833	0.368452	DOWN
Tab2	0.247752	0.0278664	0.368547	UP
Npdc1	-0.696421	0.0278938	0.368562	DOWN
Fbln2	-1.24619	0.0279991	0.369604	DOWN
G6pc3	0.437883	0.0281515	0.370932	UP
Cetn3	0.274887	0.0281526	0.370932	UP
BC029722	0.320669	0.0281829	0.370982	UP
Leo1	0.463821	0.0282477	0.371097	UP
Exo5	-0.56274	0.0282694	0.371097	DOWN
Ly6d	2.01314	0.028271	0.371097	UP
Haspin	-2.12021	0.0283014	0.371148	DOWN
E130309D02Rik	-0.477741	0.0283619	0.371594	DOWN
Cars	-0.317611	0.0284432	0.372311	DOWN
Tubb5	-0.472499	0.0285079	0.37281	DOWN
Wdr37	0.26781	0.0286559	0.3739	UP
Sem1	-0.257703	0.0286655	0.3739	DOWN
Phb	-0.315462	0.0286713	0.3739	DOWN
Gpc1	0.680078	0.0287111	0.374071	UP
Unc5d	2.67611	0.0287298		UP
Gm10985	1.62506	0.0288257		UP
Trim13	0.63129	0.0288622	0.375013	UP
Bco2	-0.448508	0.0288931	0.375013	DOWN
Tmem30a	0.174104	0.0289463	0.375013	UP
Ulbp1	-1.35497	0.0289627	0.375013	DOWN
Leap2	0.613421	0.0289778	0.375013	UP
Grik4	1.47929	0.0289793	0.375013	UP
Cyb5b	-0.367499	0.0290223	0.375013	DOWN
Gria2	-15.0133	0.0290321	0.375013	DOWN
Mtfr1	0.223775	0.0290503	0.375013	UP
Dpp9	-0.428006	0.0290509	0.375013	DOWN
Adh4	-0.571873	0.0290841	0.375096	DOWN
Aebp2	0.242117	0.0292811	0.37669	UP
Mrnip	-0.82679	0.0292839	0.37669	DOWN
Hck	-0.957408	0.0293216	0.37669	DOWN
Tlcd2	-0.585167	0.0293992	0.37669	DOWN
Ubtd1	-0.40038	0.0294101	0.37669	DOWN
Vps36	0.19205	0.0294239	0.37669	UP
Ascc2	-0.248077	0.0294329	0.37669	DOWN
Pld4	-0.692287	0.0294493	0.37669	DOWN
Rbm6	-0.399107	0.0294495	0.37669	DOWN
C730034F03Rik	0.828836	0.029504	0.376757	UP
Pfkl	-0.44029	0.0295085	0.376757	DOWN
Gclc	-0.372714	0.0296166	0.377794	DOWN
Scap	-0.354535	0.0297045	0.378424	DOWN
Secisbp2	0.293984	0.0297425	0.378424	UP
Shisa5	-0.367283	0.0297741	0.378424	DOWN
Lysmd2	-1.18522	0.0298107	0.378424	DOWN
Vsig2	1.83602	0.0298278	0.378424	UP
Maz	-0.247588	0.0298542	0.378424	DOWN
Prelid3b	0.268796	0.0298596	0.378424	UP
Gm11992	-1.29033	0.029864		DOWN
Thbs1	1.40322	0.029882	0.378424	UP
Cln5	-0.235507	0.0299648	0.379131	DOWN
Vma21	0.293253	0.0301434	0.380595	UP
Ulk1	-0.407104	0.0301461	0.380595	DOWN
Rab11fip2	0.427542	0.0301966	0.380595	UP
Ipo8	-0.236819	0.030204	0.380595	DOWN
Nt5e	0.662808	0.0302163	0.380595	UP
Pcm1	0.370196	0.030297	0.381094	UP
Tle1	-0.474744	0.0303103	0.381094	DOWN
Camsap1	0.439958	0.0303901	0.381217	UP
Impa1	-0.239144	0.0303937	0.381217	DOWN
Fosb	-2.37294	0.0304016	0.381217	DOWN
Sell	-1.16107	0.0304585	0.381588	DOWN
Parp8	2.83594	0.0305266	0.381928	UP
Paqr9	0.77503	0.0305561	0.381928	UP
Galk2	-0.334873	0.0305673	0.381928	DOWN
Ap3b1	-0.216003	0.0306153	0.382187	DOWN
Plekhm1	-0.422753	0.0307585	0.383633	DOWN
Mknk2	-0.472385	0.0308202	0.383959	DOWN
Apol9a	-1.27982	0.0308394	0.383959	DOWN
Utp14b	0.731437	0.0309921	0.385518	UP
Lat	-3.16061	0.0310561		DOWN
Galnt7	0.417011	0.0310779	0.386125	UP
Ces2c	-1.30972	0.0311123	0.386125	DOWN
Ythdf1	-0.198498	0.0311236	0.386125	DOWN
Irgq	0.379874	0.0312204	0.386984	UP
Pacsin3	0.289816	0.0312939	0.387523	UP
Nudt13	-0.361621	0.0313346	0.387523	DOWN
Gm5148	-3.8978	0.031342		DOWN
Pllp	1.07928	0.0313975	0.387523	UP
Six6	-2.55542	0.0313981		DOWN
Bysl	0.366511	0.0314115	0.387523	UP
Slc17a2	-0.42215	0.0314308	0.387523	DOWN
Vangl1	-0.343019	0.0314564	0.387523	DOWN
Prkd1	1.81036	0.0314574	0.387523	UP
Runx3	-2.17526	0.0316059	0.38901	DOWN
Shcbp1	-2.87958	0.0316558		DOWN
Cracr2b	-0.696136	0.0316582	0.389313	DOWN
Mapkbp1	0.487294	0.0317109	0.389505	UP
Hadha	0.419709	0.0317294	0.389505	UP
Ssc4d	0.679699	0.031795	0.389969	UP
Ech1	0.438295	0.0318654	0.390491	UP
Rtl8b	-0.622267	0.0319075	0.390665	DOWN
Irf7	-0.794323	0.0319651	0.391029	DOWN
Smim6	-1.30584	0.0319948		DOWN
Rdm1	-0.397964	0.0321323	0.392731	DOWN
Arhgap23	0.586262	0.0322348	0.393269	UP
Oas2	-1.42557	0.0322572	0.393269	DOWN
Pno1	0.268214	0.0322883	0.393269	UP
Coq10b	-0.539485	0.0322885	0.393269	DOWN
Stx3	0.422262	0.0323899	0.393686	UP
Decr1	0.545384	0.0324157	0.393686	UP
Dennd1b	0.657745	0.032419	0.393686	UP
Cep192	-1.66952	0.0324994	0.393686	DOWN
Tmem94	-0.424552	0.0325597	0.393686	DOWN
Rsph3b	-0.281828	0.0325626	0.393686	DOWN
Creb3l3	0.409114	0.0326047	0.393686	UP
Dcaf12	-0.167769	0.0326416	0.393686	DOWN
Ces1d	-0.887637	0.0326622	0.393686	DOWN
Rps6kb1	0.232482	0.0326649	0.393686	UP
Carf	0.552861	0.0326853	0.393686	UP
Pcolce2	-1.13146	0.0327017	0.393686	DOWN
Kif1a	-2.39969	0.0327047	0.393686	DOWN
Cyp1a2	-1.61705	0.0327349	0.393686	DOWN
Nubpl	0.31792	0.032744	0.393686	UP
Car3	-1.35741	0.0327801	0.393712	DOWN
Pex6	-0.436116	0.0328756	0.393712	DOWN
Usp15	0.312703	0.0329418	0.393712	UP
Cotl1	-0.646678	0.0329671	0.393712	DOWN
Lrp12	0.510036	0.0329782	0.393712	UP
Ncf4	-1.29481	0.0330227	0.393712	DOWN
Nedd1	-0.361019	0.0330608	0.393712	DOWN
Gpatch4	0.340595	0.0330928	0.393712	UP
Cyp4a12b	0.813216	0.0331184	0.393712	UP
Sel1l	0.423768	0.0331637	0.393712	UP
Nsl1	-1.48722	0.0331721	0.393712	DOWN
Tmc6	-0.593681	0.0331984	0.393712	DOWN
Ly6k	-2.92081	0.0332041		DOWN
Cend1	-2.30863	0.0332065	0.393712	DOWN
Nr1d2	-0.402343	0.0332127	0.393712	DOWN
Fam89a	0.790066	0.0332248	0.393712	UP
Cntrl	0.472398	0.0332783	0.393712	UP
Eri1	-0.302285	0.0332797	0.393712	DOWN
Tmem50a	-0.360467	0.0332941	0.393712	DOWN
Asb14	1.83387	0.0333483	0.393712	UP
Bst1	-1.43904	0.0333873	0.393712	DOWN
Sugp2	-0.5402	0.0334134	0.393712	DOWN
Atp5s	0.399022	0.0334252	0.393712	UP
Zfp810	0.591643	0.0334597	0.393712	UP
Rad1	-0.625836	0.0335016	0.393712	DOWN
Ddx59	-0.374364	0.0335102	0.393712	DOWN
1110004F10Rik	0.204262	0.0335278	0.393712	UP
Pfdn5	-0.308209	0.0335488	0.393712	DOWN
Ophn1	0.761099	0.0335599	0.393712	UP
Zfp81	-0.408591	0.0335661	0.393712	DOWN
Gid8	0.176431	0.0335886	0.393712	UP
Zfr2	2.67793	0.0336222	0.393775	UP
Sirt5	0.306545	0.0336718	0.394027	UP
Setd1b	-0.339489	0.03372	0.394263	DOWN
Rabgef1	0.340658	0.0337687	0.394503	UP
Exosc9	0.226181	0.033858	0.394911	UP
Ddhd2	0.395224	0.0338651	0.394911	UP
Cd247	1.7831	0.0338882	0.394911	UP
Plxnd1	-0.52593	0.0339468	0.395048	DOWN
Man2a2	-0.847187	0.0339641	0.395048	DOWN
Tcea1	0.206624	0.0339844	0.395048	UP
Kras	0.320785	0.0341103	0.396183	UP
Cycs	0.424384	0.0341562	0.396387	UP
Gtf3c4	0.204971	0.0342057	0.396409	UP
Gsdme	0.414391	0.0342403	0.396409	UP
Nme3	-0.551938	0.0342429	0.396409	DOWN
Trim68	-0.632666	0.0342981	0.396473	DOWN
Hacl1	0.638507	0.034305	0.396473	UP
Ahsa1	-0.225069	0.0343541	0.396713	DOWN
Ptger1	-1.74573	0.0344197	0.397126	DOWN
Idh3b	-0.373252	0.034504	0.397126	DOWN
Apool	-0.319751	0.0345163	0.397126	DOWN
Fhl4	2.69011	0.0345534	0.397126	UP
Rsad1	0.70259	0.0345623	0.397126	UP
9130023H24Rik	0.434004	0.0345652	0.397126	UP
Hras	-0.264305	0.0345881	0.397126	DOWN
Olfr481	2.50915	0.0346484		UP
Pkn1	-0.290333	0.0347911	0.398517	DOWN
Cyp2j9	0.625518	0.0347941	0.398517	UP
Ccnd1	-1.0237	0.0347946	0.398517	DOWN
Gfm1	0.366599	0.0349214	0.399343	UP
Zfand5	0.325785	0.0349418	0.399343	UP
Atl2	0.440316	0.0349638	0.399343	UP
Agtrap	-0.569177	0.0349806	0.399343	DOWN
Ctdsp2	-0.291336	0.0350476	0.399595	DOWN
Itk	-1.69881	0.0350597	0.399595	DOWN
Prdx4	-0.279628	0.0350944	0.399666	DOWN
Trp53rka	0.348694	0.0351857	0.400283	UP
Pilrb1	-1.30292	0.0352057	0.400283	DOWN
Itgb1bp1	-0.502228	0.0352746	0.400741	DOWN
Themis2	-0.9067	0.0353573	0.401044	DOWN
Syt1	-1.00024	0.0354493	0.401044	DOWN
Slc39a13	0.337095	0.0354732	0.401044	UP
Ndufaf5	-0.355091	0.035515	0.401044	DOWN
Gdf6	1.54708	0.0355215	0.401044	UP
Fam160a1	-0.848546	0.0355781	0.401044	DOWN
Rhoq	0.331942	0.0355792	0.401044	UP
Ptms	-0.404121	0.0355798	0.401044	DOWN
Tnnt2	1.35383	0.035604	0.401044	UP
Dnmt3b	0.767896	0.0356437	0.401044	UP
Nmi	-0.262298	0.0356477	0.401044	DOWN
Mrpl2	-0.291671	0.0356648	0.401044	DOWN
Sh3tc2	1.2175	0.0356732	0.401044	UP
Socs7	-0.277415	0.0358	0.40172	DOWN
Tmx4	0.22461	0.035806	0.40172	UP
Ralgps1	-0.580909	0.0358222	0.40172	DOWN
Mthfr	0.809139	0.0358479	0.40172	UP
Klhdc8a	0.988088	0.03592	0.401911	UP
Pkhd1l1	-1.74686	0.0359312	0.401911	DOWN
Ppm1h	-0.771544	0.0359765	0.401911	DOWN
Elmsan1	0.387959	0.0360062	0.401911	UP
Gatad1	0.203018	0.0360083	0.401911	UP
Plau	-1.0133	0.0362377	0.403955	DOWN
Gm49369	-2.93263	0.036264	0.403955	DOWN
Ncbp3	0.196062	0.0362778	0.403955	UP
Gm8186	-0.47321	0.0363106	0.403999	DOWN
Bmi1	0.25192	0.0363861	0.404215	UP
Sgo2a	-2.19429	0.0364103	0.404215	DOWN
Rab28	0.242447	0.0364166	0.404215	UP
Zfp503	-0.811492	0.0365058	0.404885	DOWN
Ptp4a2	0.195794	0.0366232	0.405866	UP
Ifi211	-0.921818	0.0366666	0.40598	DOWN
Slc8a3	2.29673	0.0367049	0.40598	UP
Csf1r	-0.604955	0.0367204	0.40598	DOWN
Slc35g2	1.62064	0.0369469	0.407824	UP
Tbp	0.310071	0.0369952	0.407824	UP
Fscn1	-1.07222	0.0369982	0.407824	DOWN
Edn1	-0.889715	0.0370035	0.407824	DOWN
Igsf1	-1.08443	0.0370896	0.408452	DOWN
Ylpm1	0.610613	0.03717	0.408569	UP
Acot4	0.805309	0.0371883	0.408569	UP
Casp3	-0.404616	0.0372074	0.408569	DOWN
S100a8	-1.18916	0.0372468	0.408569	DOWN
Gpr180	-0.225814	0.0372513	0.408569	DOWN
Brd1	-0.717157	0.0372802	0.408569	DOWN
H2afy	-0.198654	0.0373043	0.408569	DOWN
Mark4	-1.57023	0.0373462	0.408709	DOWN
Txndc15	-0.201682	0.0373949	0.408734	DOWN
Tceanc2	0.290341	0.0374208	0.408734	UP
Lamp1	-0.254062	0.0374396	0.408734	DOWN
Nup85	-0.231674	0.0375401	0.408734	DOWN
Gm3448	2.19472	0.0375701	0.408734	UP
Slc35f5	-0.223043	0.0375889	0.408734	DOWN
Mansc1	0.705167	0.0376147	0.408734	UP
Cep290	0.869579	0.0376373	0.408734	UP
BC024978	0.391662	0.0376446	0.408734	UP
Arl4a	0.589036	0.0376496	0.408734	UP
Vkorc1l1	0.211415	0.0376692	0.408734	UP
Mfsd1	-0.258594	0.0377005	0.408757	DOWN
Rorc	-0.479943	0.0377427	0.408861	DOWN
Acy1	-0.532022	0.0377971	0.408861	DOWN
Flrt3	-2.43283	0.0378154	0.408861	DOWN
Slc39a10	-0.820686	0.0378309	0.408861	DOWN
Luc7l	0.459642	0.0378715	0.408861	UP
Siglech	1.74285	0.037885	0.408861	UP
Klc4	-0.34068	0.0379808	0.409466	DOWN
Mill2	-2.35514	0.0379995	0.409466	DOWN
Dbi	-0.429334	0.0380361	0.409545	DOWN
Pphln1	-3.44147	0.0381327	0.41027	DOWN
Clstn3	1.00506	0.0381973	0.410471	UP
Coq2	-0.210128	0.03821	0.410471	DOWN
Snrpn	-0.324911	0.0382472	0.410471	DOWN
Trim39	0.449262	0.0382684	0.410471	UP
Dapp1	-0.82662	0.0383083	0.410584	DOWN
Rogdi	0.381358	0.03838	0.411038	UP
Hspb1	-0.742693	0.0384655	0.411639	DOWN
Mto1	-0.3226	0.0385159	0.411865	DOWN
Zfyve16	0.598024	0.0385759	0.412191	UP
Gm10282	1.18898	0.0386477	0.412282	UP
4930486L24Rik	-2.96896	0.0386693	0.412282	DOWN
Lrp3	-0.570679	0.0386726	0.412282	DOWN
Trim44	0.189376	0.0387711	0.412603	UP
Ccdc82	0.281689	0.0387871	0.412603	UP
Adam15	-0.686905	0.038791	0.412603	DOWN
BC034090	-2.51969	0.0389545	0.414028	DOWN
Laptm5	-0.608095	0.0390412	0.414312	DOWN
Klf12	-0.48419	0.0390975	0.414312	DOWN
Pdcd4	-0.403555	0.0391119	0.414312	DOWN
Ppp2r2d	0.287945	0.0391436	0.414312	UP
Sympk	-0.360628	0.0391517	0.414312	DOWN
Trim34a	-0.496376	0.0391813	0.414312	DOWN
Med12	-0.465564	0.0391881	0.414312	DOWN
Suds3	-0.197883	0.0392321	0.414464	DOWN
Zmat3	0.352767	0.039411	0.416041	UP
Nap1l4	0.195866	0.0394844	0.416424	UP
Hnrnpul1	-0.191897	0.0395066	0.416424	DOWN
Lpar2	-1.2658	0.0396502	0.417214	DOWN
Hmbox1	-0.256417	0.0396776	0.417214	DOWN
2510039O18Rik	-0.192411	0.0396871	0.417214	DOWN
Zfp781	-1.66743	0.0397006	0.417214	DOWN
Phf11d	-0.658145	0.0398244	0.418201	DOWN
Atp13a2	-0.42167	0.0400067	0.419604	DOWN
Abcc1	-0.684223	0.0400424	0.419604	DOWN
Adgrf1	-0.985815	0.0400478	0.419604	DOWN
Srl	-0.974	0.0401786	0.42066	DOWN
Gm4841	-0.938633	0.040222	0.4208	DOWN
1700123O20Rik	0.201901	0.0402882	0.42109	UP
C1ra	-0.503586	0.0403098	0.42109	DOWN
Prickle3	-0.760105	0.0403601	0.421195	DOWN
Cgrrf1	-0.205836	0.0403799	0.421195	DOWN
Nceh1	0.547705	0.040421	0.421222	UP
Cct5	-0.217317	0.0404599	0.421222	DOWN
Cnnm3	-0.343093	0.04051	0.421222	DOWN
Tgfbr3l	1.43569	0.0405256	0.421222	UP
Ing3	0.405802	0.0405327	0.421222	UP
Spns1	-0.409237	0.040668	0.422094	DOWN
Trmt12	0.383886	0.0406769	0.422094	UP
Hexa	-0.263478	0.0408173	0.422947	DOWN
Prpf4	-0.261652	0.0408194	0.422947	DOWN
Sub1	0.298072	0.0409336	0.423771	UP
Ddx50	0.241996	0.0410615	0.423771	UP
Nr0b2	-0.670699	0.0410714	0.423771	DOWN
Hnrnpu	0.290928	0.0411016	0.423771	UP
Btg1	0.503782	0.041167	0.423771	UP
Phf24	1.22709	0.0412103	0.423771	UP
Ppp2r5d	-0.32117	0.0412124	0.423771	DOWN
Gm14698	1.40348	0.0412491	0.423771	UP
Adcy2	-1.97923	0.041296	0.423771	DOWN
1700037C18Rik	0.998818	0.0413236	0.423771	UP
Ubtd2	-1.01842	0.0413315	0.423771	DOWN
Psme3	0.149299	0.0413515	0.423771	UP
Phf11c	-1.07308	0.0413551	0.423771	DOWN
Atp1b2	1.17499	0.0413865	0.423771	UP
Smim4	0.405627	0.0413926	0.423771	UP
Scn3a	1.5546	0.0414044	0.423771	UP
Lfng	-0.815121	0.0414411	0.423771	DOWN
Cox7a2	-0.260369	0.0414634	0.423771	DOWN
Pomp	-0.232868	0.0415464	0.423771	DOWN
Rbm12b2	0.778378	0.0415559	0.423771	UP
Olfr671	2.62736	0.0416257		UP
Kif11	-1.04914	0.0416564	0.423771	DOWN
Arfip1	0.265336	0.0416768	0.423771	UP
Cenpj	-0.479748	0.0416798	0.423771	DOWN
Dnajc30	0.282957	0.041688	0.423771	UP
Atp2a2	0.389053	0.0417276	0.423771	UP
Cpne2	-0.615343	0.041732	0.423771	DOWN
Ankrd2	0.908636	0.0417335	0.423771	UP
Rfc1	-0.242841	0.0417663	0.423771	DOWN
Tmem56	0.597879	0.0417756	0.423771	UP
2310022B05Rik	-0.290467	0.0419082	0.424317	DOWN
Ddx42	0.153538	0.0419159	0.424317	UP
Mpnd	-0.275141	0.0419384	0.424317	DOWN
Iah1	-0.31053	0.041965	0.424317	DOWN
Aatk	1.20659	0.0419807	0.424317	UP
Trim65	-0.656607	0.0422394	0.426624	DOWN
Pcdhb15	-2.4214	0.0422748		DOWN
Bcl7c	0.49378	0.0422889	0.426816	UP
Acot1	1.31083	0.0423476	0.427101	UP
Ppargc1b	-0.673865	0.0424146	0.427469	DOWN
Anapc13	-0.320598	0.0424866	0.427887	DOWN
Acp5	-0.799015	0.0425249	0.427966	DOWN
Lect2	-0.518262	0.0426322	0.428738	DOWN
Zfp668	0.520364	0.042721	0.429323	UP
Ablim1	-0.504178	0.0427815	0.429326	DOWN
Pnrc1	0.393236	0.0427826	0.429326	UP
Dpep1	0.914988	0.0428816	0.430012	UP
Upf3b	0.313803	0.0429278	0.430152	UP
Ttn	1.5887	0.0429985	0.430152	UP
Ispd	-0.379954	0.0430825	0.430152	DOWN
Perm1	2.09626	0.0431032	0.430152	UP
Prpf8	-0.202489	0.0431144	0.430152	DOWN
Ltv1	0.301403	0.0431221	0.430152	UP
Mettl1	0.484933	0.0431554	0.430152	UP
Pde6d	0.341375	0.0431921	0.430152	UP
Fjx1	2.32137	0.0432141	0.430152	UP
Rad23a	-0.300378	0.0432365	0.430152	DOWN
Stoml2	-0.255177	0.0432594	0.430152	DOWN
Tsr1	0.345812	0.0432654	0.430152	UP
Fam104a	-0.256301	0.0433024	0.430152	DOWN
Tkt	-0.806487	0.0433251	0.430152	DOWN
Rdh16f2	-0.498122	0.0433767	0.430302	DOWN
Katna1	-0.280333	0.0434099	0.430302	DOWN
Nfix	-0.243974	0.0434717	0.430302	DOWN
Rbfa	-0.274135	0.0434827	0.430302	DOWN
Emp2	-0.369105	0.0435601	0.430302	DOWN
Eid1	0.359305	0.0435698	0.430302	UP
Fam213b	-0.485782	0.043583	0.430302	DOWN
Polr3b	-0.246697	0.0435858	0.430302	DOWN
Mmgt1	0.33484	0.0436824	0.430682	UP
Tsku	0.858566	0.0436857	0.430682	UP
Epn1	-0.198225	0.0437239	0.430684	DOWN
Borcs7	0.347925	0.0437473	0.430684	UP
Dhx16	-0.213453	0.0438748	0.431613	DOWN
Msantd3	2.08656	0.0439033	0.431613	UP
Sp100	-0.619243	0.0439431	0.431663	DOWN
D130040H23Rik	-2.62081	0.0439772		DOWN
Eng	-0.560583	0.0440211	0.431663	DOWN
Srsf6	0.359228	0.0440503	0.431663	UP
Vamp5	-0.491034	0.0440584	0.431663	DOWN
Zfp950	0.624695	0.0440623	0.431663	UP
Nfyb	-0.258193	0.0442137	0.432414	DOWN
Neu3	0.53399	0.0442285	0.432414	UP
Slc25a16	0.239337	0.0442455	0.432414	UP
Irak2	0.660561	0.0442624	0.432414	UP
Sec24a	0.307627	0.0443454	0.432924	UP
Tcim	0.559231	0.0444737	0.433585	UP
Akr1c13	-0.323542	0.044475	0.433585	DOWN
Socs3	-0.803968	0.0445325	0.433843	DOWN
Msantd2	0.458105	0.0446893	0.435069	UP
Clock	0.40233	0.0447272	0.435136	UP
Trim24	0.381185	0.0447903	0.435448	UP
A730061H03Rik	-2.33455	0.0448079		DOWN
Myrip	-1.8112	0.0448808	0.436025	DOWN
Uhrf1	-1.52618	0.044932	0.43622	DOWN
Pold3	-0.375524	0.0449926	0.436348	DOWN
Sfxn4	-2.56308	0.0450075	0.436348	DOWN
Natd1	-0.401728	0.0450565	0.436522	DOWN
Ntpcr	0.290415	0.0451408	0.437036	UP
Rrp12	0.460299	0.0451969	0.437277	UP
Vars2	-1.1071	0.0452537	0.437511	DOWN
Timm9	0.315213	0.0452834	0.437511	UP
Sept7	0.209875	0.0455028	0.439281	UP
Bcl2a1a	-2.74344	0.0455267		DOWN
Smyd1	0.360361	0.0455293	0.439281	UP
Dtl	-1.69147	0.0456907	0.440535	DOWN
Bag3	0.422335	0.0457874	0.440749	UP
Nmnat1	-0.34797	0.0457936	0.440749	DOWN
Tax1bp1	0.187798	0.0458388	0.440749	UP
Adgra2	-0.55275	0.045857	0.440749	DOWN
Ppp1r3f	1.37202	0.0459001	0.440749	UP
Pdzd8	0.276573	0.0459015	0.440749	UP
Wfdc17	-0.815769	0.0461182	0.442526	DOWN
Ifit3	-0.607858	0.0461718	0.442738	DOWN
Lemd3	0.270249	0.0462309	0.443001	UP
Mep1b	-3.16186	0.0463101		DOWN
Tcap	2.10056	0.0463234	0.443362	UP
C2cd4c	1.24823	0.0463318	0.443362	UP
Dram2	0.344444	0.046429	0.443439	UP
Pm20d2	-0.700623	0.0464507	0.443439	DOWN
Scml4	-2.59155	0.0464667	0.443439	DOWN
Coq3	0.292058	0.0464735	0.443439	UP
Tnfaip6	2.00287	0.046498	0.443439	UP
Slc38a6	0.401701	0.0466095	0.443743	UP
Insig2	0.544852	0.0466522	0.443743	UP
B930094E09Rik	0.901527	0.0466918	0.443743	UP
Spg20	0.316078	0.0467781	0.443743	UP
Pkd1l3	1.11809	0.0467946	0.443743	UP
Plekhn1	-0.370796	0.0468246	0.443743	DOWN
Chic1	0.607276	0.0468432	0.443743	UP
Dhrs11	-0.264721	0.0468667	0.443743	DOWN
Mid1ip1	-0.87307	0.0468746	0.443743	DOWN
Vav3	-0.75399	0.0469165	0.443743	DOWN
Akt1	-0.23413	0.0469698	0.443743	DOWN
Polr1c	-0.259054	0.0469903	0.443743	DOWN
Rpl11	-0.178694	0.0470461	0.443743	DOWN
Olfr472	0.574662	0.047061	0.443743	UP
Slc25a1	-2.62422	0.047074	0.443743	DOWN
Ppp1r12a	0.292985	0.0471116	0.443743	UP
Adh1	-0.714112	0.0471126	0.443743	DOWN
Cyth2	0.365802	0.0471581	0.443743	UP
Tnnc1	-0.798809	0.0471846	0.443743	DOWN
Gart	-0.518123	0.0473635	0.443743	DOWN
Smlr1	0.47281	0.0473994	0.443743	UP
Alpk1	-0.849821	0.0474002	0.443743	DOWN
Greb1	2.48154	0.0474806	0.443743	UP
Gm5096	0.995357	0.0474842	0.443743	UP
Hexim2	0.490927	0.0474979	0.443743	UP
Flii	-0.243441	0.0475011	0.443743	DOWN
Acsm2	-1.04993	0.0475347	0.443743	DOWN
Olfr1312	0.730393	0.0475406	0.443743	UP
Pfkfb3	-1.05424	0.0475595	0.443743	DOWN
Lrif1	0.378046	0.0475633	0.443743	UP
Nudcd2	0.336976	0.047583	0.443743	UP
Fam168b	-0.16974	0.0476138	0.443743	DOWN
C1qb	-0.628401	0.0476191	0.443743	DOWN
Hif1a	0.306078	0.0476508	0.443743	UP
Ppid	-0.295984	0.0476837	0.443743	DOWN
Bcl6	-0.855501	0.0476891	0.443743	DOWN
Fau	0.432759	0.0477271	0.443743	UP
Pdlim4	-1.26888	0.0477471	0.443743	DOWN
Txndc11	0.344689	0.0477643	0.443743	UP
Olfr1328	0.936838	0.0478125	0.443896	UP
Vnn1	1.27304	0.0479469	0.44485	UP
Prr14l	-0.363103	0.0480355	0.445376	DOWN
Fbxo4	-0.337665	0.048148	0.446124	DOWN
Tekt2	-2.27521	0.0483113	0.447343	DOWN
Cd3e	2.56518	0.0483264		UP
Pdk1	-0.36854	0.0483639	0.447534	DOWN
Nr1d1	-0.647683	0.0484481	0.448017	DOWN
Aldh1a3	1.08698	0.0484925	0.448122	UP
Pgm5	-1.11126	0.0485234	0.448122	DOWN
Efnb2	-0.588736	0.0486141	0.448439	DOWN
Unc5a	-0.899434	0.0486451	0.448439	DOWN
Acadl	0.467942	0.0486847	0.448439	UP
Htra3	0.701397	0.0487084	0.448439	UP
Rapgef6	-0.385616	0.0487177	0.448439	DOWN
Cyp2b10	-1.39988	0.0487712	0.448637	DOWN
Cct6b	0.83506	0.0488105	0.448704	UP
Rab20	-0.711175	0.0489638	0.449819	DOWN
Tmem156	-1.90216	0.0490573		DOWN
Usp35	1.34189	0.0490842	0.450629	UP
H2-Q7	-0.783821	0.0492624	0.45197	DOWN
Il6st	-0.352217	0.0493274	0.45227	DOWN
Rbm22	0.23914	0.0494993	0.453549	UP
Hibadh	-0.349308	0.0495788	0.453981	DOWN
Chpt1	0.635474	0.0497311	0.454629	UP
Slc25a37	-0.463566	0.0497665	0.454629	DOWN
Chd4	0.23313	0.0497755	0.454629	UP
Tinagl1	-0.579832	0.049792	0.454629	DOWN
Tmem131l	-0.397933	0.0498117	0.454629	DOWN
Rbck1	-0.250658	0.0498464	0.45465	DOWN
Gldc	0.545091	0.0499958	0.455457	UP
Mtmr14	-0.389857	0.0499998	0.455457	DOWN
Tcaf1	-0.528305	0.0502322	0.456728	DOWN
Cxcl16	-0.665135	0.0502346	0.456728	DOWN
Cdyl	0.398758	0.0502371	0.456728	UP
Mutyh	-2.70877	0.0502565		DOWN
Map3k5	-0.41903	0.050367	0.457612	DOWN
Timd4	-0.846465	0.050466	0.458023	DOWN
Nfatc4	1.42132	0.0504776	0.458023	UP
Tmf1	0.419751	0.0505178	0.458091	UP
Ppp2r3a	0.327849	0.0505522	0.458091	UP
Plekhf1	-0.499169	0.0506468	0.458091	DOWN
Birc3	-0.409058	0.0506517	0.458091	DOWN
Cpeb4	0.420713	0.0506556	0.458091	UP
Kyat1	-0.646744	0.0506811	0.458091	DOWN
Nfe2l3	-1.98391	0.0507852	0.458735	DOWN
Prkci	0.265436	0.0509436	0.45987	UP
Fads1	-0.479334	0.0510059	0.460136	DOWN
Psmd6	0.161404	0.0511298	0.460703	UP
Vmn1r197	1.17172	0.0511615	0.460703	UP
Neil1	-0.381429	0.0511793	0.460703	DOWN
Tex30	-0.339023	0.0512002	0.460703	DOWN
Otud5	-0.360136	0.0513787	0.462013	DOWN
Dcst2	1.92691	0.0514484	0.462343	UP
Crlf2	-0.612848	0.0517639	0.464733	DOWN
Ms4a4a	1.67823	0.0517807	0.464733	UP
Rec114	-1.64415	0.0517924		DOWN
Gm45015	1.99721	0.0518194		UP
Mtap	0.216409	0.0518362	0.464934	UP
Kcna5	-2.34524	0.0518854	0.465077	DOWN
Zfp879	1.06037	0.0519627	0.465473	UP
Fgf10	-2.3392	0.0520395	0.465863	DOWN
Ncam1	-1.76857	0.0520768	0.465877	DOWN
Avl9	-0.293004	0.0521075	0.465877	DOWN
Hdac2	0.174341	0.0521769	0.4662	UP
Gm42742	-0.507052	0.052254	0.466591	DOWN
Dr1	0.26499	0.0523596	0.467237	UP
Eef2k	-0.62471	0.0525601	0.468029	DOWN
Rom1	0.416087	0.0525778	0.468029	UP
Zfp563	1.04962	0.0527059	0.468029	UP
Meig1	-2.57938	0.052709	0.468029	DOWN
Shank3	-0.996939	0.0527382	0.468029	DOWN
Atp6v1a	0.231753	0.0527698	0.468029	UP
Rfesd	0.274902	0.0528943	0.468029	UP
Miga2	0.472614	0.0529022	0.468029	UP
Kif5b	0.264592	0.0529352	0.468029	UP
Wipf2	-0.24713	0.0529386	0.468029	DOWN
Trim33	0.248215	0.0529848	0.468029	UP
Dock3	1.15148	0.0529953	0.468029	UP
Foxs1	1.70265	0.0530027	0.468029	UP
Mtr	-0.27685	0.0530546	0.468029	DOWN
Mvp	-0.297236	0.0530784	0.468029	DOWN
Phf13	0.299264	0.0530969	0.468029	UP
Mcm2	-0.724096	0.0531294	0.468029	DOWN
Rere	-0.23641	0.0531412	0.468029	DOWN
Cct2	0.155374	0.0531969	0.468029	UP
Cars2	-0.440462	0.053272	0.468029	DOWN
Tap1	-0.462599	0.0532874	0.468029	DOWN
F11	-0.416366	0.0532947	0.468029	DOWN
Zfp212	0.260509	0.0533073	0.468029	UP
Arl14ep	0.272721	0.0533105	0.468029	UP
Gsap	-0.726087	0.0533181	0.468029	DOWN
Hrct1	1.37806	0.0533425	0.468029	UP
Erlin1	-0.348519	0.0533497	0.468029	DOWN
Bcl2a1b	1.66832	0.0534786	0.468866	UP
ccdc198	-2.86702	0.0535174	0.468913	DOWN
Uba3	0.200884	0.0536332	0.469634	UP
Cd151	-0.224174	0.0536971	0.4699	DOWN
Fam98b	0.25681	0.0538779	0.470786	UP
Gls2	-0.785943	0.0539325	0.470786	DOWN
Dgke	0.463753	0.0539327	0.470786	UP
Brcc3	0.23856	0.0539392	0.470786	UP
Klhdc2	-0.200987	0.0539663	0.470786	DOWN
2810004N23Rik	0.19937	0.0540422	0.471156	UP
Hrk	-2.289	0.054091	0.471288	DOWN
Hapln1	-1.8043	0.0541151		DOWN
Srp54c	0.266885	0.0542297	0.471919	UP
Snx25	-0.308439	0.054239	0.471919	DOWN
Klk1b4	-1.28409	0.0542645	0.471919	DOWN
Pde6h	0.998597	0.0543079	0.472004	UP
Fam83d	-1.75524	0.0543968		DOWN
Gaa	-0.229166	0.0544718	0.472348	DOWN
Dut	-0.432551	0.054492	0.472348	DOWN
Qdpr	-0.317221	0.0545271	0.472348	DOWN
Blvrb	-0.385959	0.0545338	0.472348	DOWN
Fgfr3	-0.619515	0.0545362	0.472348	DOWN
Myl7	-2.23859	0.0545497	0.472348	DOWN
Coa6	0.306148	0.0546859	0.473129	UP
Rgs19	-0.691713	0.0547073	0.473129	DOWN
Dynlt3	-0.191711	0.0547837	0.473213	DOWN
Mphosph8	0.25726	0.0547846	0.473213	UP
Itga4	0.641328	0.0549435	0.474294	UP
Ncoa3	-0.281618	0.0550556	0.474469	DOWN
Cebpe	-0.711515	0.055061	0.474469	DOWN
Rpl27a	-0.296583	0.0550653	0.474469	DOWN
Uhrf2	-0.403675	0.0550999	0.474475	DOWN
Olfr102	-2.30129	0.0552235		DOWN
Stx6	0.352651	0.0552742	0.475536	UP
Ficd	0.343402	0.0553226	0.475536	UP
Reep3	0.234493	0.0553249	0.475536	UP
Slc16a3	1.37557	0.055551	0.477187	UP
Ftsj3	0.286774	0.0556252	0.477532	UP
Sprr1a	2.60356	0.0556993	0.477876	UP
Tut4	-0.312298	0.0558061	0.478499	DOWN
Hes1	-0.598679	0.0558957	0.478974	DOWN
Car9	-3.03824	0.0559511		DOWN
Arf3	2.12343	0.0560348	0.479873	UP
Hmcn1	-0.835148	0.0560724	0.479901	DOWN
Ebna1bp2	0.331003	0.0561187	0.479907	UP
Vps37d	1.54405	0.0561415	0.479907	UP
Gpr174	-2.47835	0.056218		DOWN
Trafd1	-0.468519	0.056361	0.481397	DOWN
Sfxn5	-0.429777	0.0563845	0.481397	DOWN
Hk2	-0.742709	0.0564973	0.482067	DOWN
Coq10a	-0.257638	0.0565594	0.482303	DOWN
Skil	0.720287	0.0565979	0.482338	UP
Mrps24	-0.636574	0.056738	0.48314	DOWN
Dusp8	-0.951581	0.0567806	0.48314	DOWN
Mcoln1	-0.221129	0.0568137	0.48314	DOWN
Clic3	-4.0623	0.0568225		DOWN
Pde7a	0.460308	0.0568366	0.48314	UP
Wdr12	0.234027	0.0568644	0.48314	UP
Ube2e3	0.190352	0.0570305	0.484259	UP
Tssk1	1.46589	0.057055		UP
Rpa1	-0.242809	0.0570659	0.484265	DOWN
Hist1h2bc	-0.253259	0.057235	0.485184	DOWN
Supt4a	-0.256395	0.0572537	0.485184	DOWN
Trim21	-0.442704	0.0572779	0.485184	DOWN
Supt7l	0.231225	0.0573593	0.48558	UP
Pfdn1	-0.179308	0.0576272	0.486698	DOWN
Cirbp	0.646917	0.0576629	0.486698	UP
Znhit2	0.302079	0.057669	0.486698	UP
Zfyve9	-0.23966	0.0576771	0.486698	DOWN
Trio	-0.594642	0.0576827	0.486698	DOWN
Fcer1g	-0.588723	0.0576997	0.486698	DOWN
Hsd3b5	-1.25233	0.0577827	0.487105	DOWN
Ctsl	0.357379	0.0578952	0.487553	UP
Hbb-bt	-0.882484	0.0579112	0.487553	DOWN
Caprin1	0.217054	0.0579417	0.487553	UP
Enho	-0.591868	0.0579749	0.487553	DOWN
Itih1	-0.324162	0.0580532	0.487657	DOWN
AB124611	-0.767989	0.0580763	0.487657	DOWN
Sox18	-0.708691	0.0580917	0.487657	DOWN
Ncl	0.293392	0.058202	0.488111	UP
Dedd2	-0.488953	0.0582154	0.488111	DOWN
Myh6	1.81062	0.0582673	0.488254	UP
Srsf1	0.238004	0.0583761	0.488427	UP
Rgs16	-1.20652	0.0584206	0.488427	DOWN
Mxd4	-0.331915	0.0584936	0.488427	DOWN
Gad2	2.44701	0.0585039		UP
Eif6	0.252674	0.058514	0.488427	UP
Tcea3	-0.767554	0.0585926	0.488427	DOWN
Nppa	2.38422	0.0586181	0.488427	UP
Bzw1	0.176591	0.05862	0.488427	UP
Ldb3	1.60846	0.0586265	0.488427	UP
Fign	0.613079	0.0586526	0.488427	UP
2210016L21Rik	0.286002	0.0586799	0.488427	UP
Nr1h2	-0.267819	0.0586897	0.488427	DOWN
Apex2	0.349139	0.0587061	0.488427	UP
Gnb2	-0.245387	0.0589725	0.489961	DOWN
Ltc4s	-2.00863	0.0589759	0.489961	DOWN
Rras	-0.369187	0.0589953	0.489961	DOWN
Pnpla6	0.347147	0.0590421	0.489984	UP
Fam25c	-0.416909	0.0590855	0.489984	DOWN
Pex11a	0.408628	0.0591479	0.489984	UP
Samd12	-1.19489	0.0591522	0.489984	DOWN
Slc25a30	0.52623	0.0591727	0.489984	UP
Crtap	-0.48608	0.0593428	0.491102	DOWN
Zbtb49	-1.51007	0.0594549	0.491396	DOWN
Comtd1	-0.820359	0.0594702	0.491396	DOWN
Nsun2	-0.189385	0.0594835	0.491396	DOWN
Cuedc1	1.6154	0.0595891	0.491978	UP
Fgf1	0.578847	0.0596278	0.492008	UP
Alas2	-0.817899	0.0597995	0.492902	DOWN
Tfg	0.271931	0.0598104	0.492902	UP
Zfp346	0.371981	0.0598416	0.492902	UP
Zfyve26	-0.316203	0.0598937	0.492925	DOWN
Armc10	-0.285144	0.0599414	0.492925	DOWN
Tchp	0.974809	0.0599499	0.492925	UP
Rpl27	0.532346	0.0601516	0.494155	UP
Limch1	0.973494	0.06017	0.494155	UP
Iqgap1	-0.418783	0.0603149	0.495056	DOWN
Klhdc10	0.152993	0.0603575	0.495115	UP
Tada2b	0.228995	0.060406	0.495223	UP
Pcdh15	2.43468	0.0605526		UP
Ripply3	-0.712166	0.0605582	0.495601	DOWN
Ipmk	-0.316501	0.0605945	0.495601	DOWN
Ston1	-0.862995	0.0606148	0.495601	DOWN
Smap1	0.236948	0.060666	0.495601	UP
Twist2	2.12772	0.0606711	0.495601	UP
Klhl13	-0.534645	0.0606928	0.495601	DOWN
Fam107a	-1.64424	0.0606996	0.495601	DOWN
Hdac11	-0.785686	0.0607776	0.495949	DOWN
Zfat	-2.33651	0.060858	0.496251	DOWN
Add1	-0.194472	0.0610067	0.496251	DOWN
Gatad2a	0.29752	0.0610082	0.496251	UP
Eif3e	0.206779	0.0610415	0.496251	UP
Pttg1ip	0.215721	0.0610754	0.496251	UP
Kif26a	-1.16476	0.0610823	0.496251	DOWN
Galm	-0.399497	0.0611075	0.496251	DOWN
Ctnnal1	-0.466995	0.0611493	0.496251	DOWN
Kctd3	-0.295314	0.0611509	0.496251	DOWN
Psmd12	0.166317	0.0611686	0.496251	UP
Rps24	-0.186988	0.0612073	0.496278	DOWN
M6pr	-0.147424	0.061279	0.496573	DOWN
Dusp5	1.67256	0.0613735	0.497051	UP
Ptprq	-2.43387	0.061457	0.49744	DOWN
Rfx1	-0.474586	0.0615001	0.497454	DOWN
Rbms2	-0.407508	0.0615297	0.497454	DOWN
Tnfaip8	-0.556435	0.0616371	0.498035	DOWN
Jrk	0.60071	0.0616945	0.498212	UP
Chst2	-0.835465	0.0617774	0.498378	DOWN
Tmem198b	0.48083	0.0617935	0.498378	UP
Ptk2b	-0.323306	0.0618497	0.498378	DOWN
Ccl2	1.90648	0.0618896	0.498378	UP
Abhd17c	-0.327496	0.0619779	0.498378	DOWN
Tmx3	0.244674	0.062011	0.498378	UP
Cnksr3	0.372512	0.0620588	0.498378	UP
Aga	-0.277229	0.0620663	0.498378	DOWN
Fut10	-0.845631	0.0620678	0.498378	DOWN
Tmem167	0.236859	0.0620706	0.498378	UP
Stat1	-0.375183	0.0621479	0.498465	DOWN
Tgds	-0.29966	0.0621526	0.498465	DOWN
Bhmt	1.39583	0.0622604	0.499045	UP
Slc35f6	0.245526	0.0623893	0.499391	UP
Il11ra1	-0.269167	0.0624158	0.499391	DOWN
Dpy19l1	0.375113	0.0624411	0.499391	UP
As3mt	0.321981	0.062505	0.499391	UP
Ercc2	-0.282278	0.0625111	0.499391	DOWN
Gng11	-0.572126	0.0625968	0.499391	DOWN
Rnf113a2	0.278229	0.0626087	0.499391	UP
Gm14403	-0.56212	0.0626142	0.499391	DOWN
Rbm4	-0.311176	0.0626288	0.499391	DOWN
Gpd1	0.601944	0.0626598	0.499391	UP
Ces2a	-0.661206	0.0627308	0.499672	DOWN
Kbtbd3	0.389606	0.0628148	0.499937	UP
Gm3755	2.18318	0.0628841		UP
B3gat3	0.297254	0.062907	0.499937	UP
Rtl8c	-1.05695	0.0629207	0.499937	DOWN
Zfp651	1.58396	0.0629223	0.499937	UP
Olfr1555-ps1	1.66144	0.0629457		UP
1110059E24Rik	0.278697	0.0629582	0.499937	UP
Pdss2	-0.226536	0.062978	0.499937	DOWN
Olfr1220	1.15253	0.063018	0.499971	UP
Hist1h1d	-0.98003	0.0632352	0.501411	DOWN
Zscan22	0.4951	0.0633445	0.501475	UP
Pcif1	0.233022	0.0633537	0.501475	UP
Acot9	-0.438651	0.0633675	0.501475	DOWN
Lama3	-0.851053	0.0633864	0.501475	DOWN
Gm14325	-0.477619	0.0635334	0.502101	DOWN
Atp8a1	-0.44195	0.0635823	0.502101	DOWN
Slc9a9	-0.738889	0.0635833	0.502101	DOWN
Pcdhga12	2.46444	0.0636088	0.502101	UP
Gm9958	0.957368	0.0637068	0.502592	UP
Frrs1	-0.347494	0.0638091	0.503116	DOWN
Jakmip3	2.20511	0.0638708		UP
Cyp2c70	-1.61454	0.0638895	0.503442	DOWN
Tubb2b	2.38122	0.0639223	0.503442	UP
Trpm5	2.81341	0.0641047		UP
Rdh13	0.363172	0.0641143	0.504584	UP
Tagln	-0.45679	0.0642039	0.504584	DOWN
Slc23a2	-0.458709	0.064235	0.504584	DOWN
Mthfd2l	0.491644	0.0642375	0.504584	UP
Hsd17b4	0.353232	0.0642473	0.504584	UP
Olfr251	-2.25109	0.0642514		DOWN
Nipsnap2	0.286736	0.0643366	0.505003	UP
Stard3	-0.334374	0.0644283	0.505439	DOWN
Zzef1	-0.442079	0.0644761	0.505531	DOWN
Smim19	0.364991	0.0646564	0.506662	UP
Tmem229b	-0.844421	0.0647007	0.506726	DOWN
Ltbp1	-0.661943	0.0647731	0.506805	DOWN
Enc1	0.660327	0.0648105	0.506805	UP
Efcc1	-2.38197	0.0648469		DOWN
Fancb	-0.971658	0.0648831	0.506805	DOWN
Stk25	-0.348498	0.0649314	0.506805	DOWN
Slc16a6	0.659086	0.064933	0.506805	UP
Kdm2a	-0.193673	0.0649745	0.506805	DOWN
Kbtbd13	-2.08413	0.0649948	0.506805	DOWN
Atxn7l3b	0.16104	0.0650257	0.506805	UP
Amz2	-0.197396	0.0650582	0.506805	DOWN
Ppbp	-1.37848	0.0650724	0.506805	DOWN
Gm49486	-2.19995	0.0651085	0.506805	DOWN
Arhgef12	-0.250492	0.0652092	0.507307	DOWN
Lgmn	-0.347265	0.0652727	0.507471	DOWN
Tmem184b	-1.7223	0.065313	0.507471	DOWN
Tex9	1.57981	0.0653699	0.507471	UP
1110065P20Rik	0.414037	0.065386	0.507471	UP
Klc2	0.316101	0.0654112	0.507471	UP
Synpo2l	1.39317	0.0655051	0.507742	UP
Eif1a	0.407732	0.065558	0.507742	UP
Coro6	1.94392	0.0655601	0.507742	UP
Dapk1	-0.489656	0.065591	0.507742	DOWN
Zbtb44	0.226589	0.0658315	0.509319	UP
Ocstamp	0.719755	0.0658971	0.509319	UP
Dkc1	-0.368902	0.0659037	0.509319	DOWN
Treh	1.79346	0.0660316	0.509675	UP
B4galt2	-1.56449	0.0660391	0.509675	DOWN
Rpl15	-0.282548	0.0660589	0.509675	DOWN
Zfp385c	-2.38073	0.066104		DOWN
Wdr90	-5.33823	0.0662307	0.510634	DOWN
Ccrl2	-0.726912	0.066256	0.510634	DOWN
Azin2	-1.01885	0.06634	0.511	DOWN
Tmem140	-0.589165	0.0663984	0.511169	DOWN
Car5a	-0.412818	0.0664399	0.511208	DOWN
Ifi35	-0.269867	0.0665395	0.511694	DOWN
Ces1f	-1.43821	0.0666598	0.512338	DOWN
Acr	2.60838	0.0667226	0.512468	UP
Trim35	-0.415381	0.0667498	0.512468	DOWN
Il2ra	-1.65826	0.0669414	0.513341	DOWN
4930453N24Rik	0.206881	0.0670316	0.513341	UP
Mustn1	0.623474	0.0670409	0.513341	UP
Epb41	0.415548	0.0670947	0.513341	UP
Rbbp4	-0.171744	0.0671161	0.513341	DOWN
Prps2	-0.491383	0.0671307	0.513341	DOWN
F7	-0.462472	0.0671411	0.513341	DOWN
Ybx1	-0.166477	0.0671869	0.513341	DOWN
Crls1	0.463483	0.0671932	0.513341	UP
Cstf2t	0.199965	0.0673043	0.51391	UP
Sf3b2	-0.154493	0.0673692	0.514126	DOWN
Dnajb9	0.403868	0.067509	0.514699	UP
Zgrf1	-1.52221	0.0675624	0.514699	DOWN
Ngef	-0.962654	0.0675885	0.514699	DOWN
Saa3	-0.840976	0.0676477	0.514699	DOWN
Agl	-0.304771	0.0676563	0.514699	DOWN
Trip11	0.250898	0.0676647	0.514699	UP
Pole	-0.834059	0.0677668	0.515197	DOWN
Tut7	-0.17444	0.0678937	0.515784	DOWN
Zfp9	0.593366	0.0679365	0.515784	UP
Eya4	1.33372	0.0679544	0.515784	UP
1700028J19Rik	-2.01264	0.0679861		DOWN
Olfml1	-0.584424	0.0680118	0.51594	DOWN
Zfp428	0.611943	0.0681033	0.516257	UP
4833439L19Rik	0.210172	0.0681272	0.516257	UP
Zfp821	-0.507027	0.0682164	0.516654	DOWN
Cab39	0.244831	0.0683557	0.517163	UP
Cdk2ap1	0.190835	0.0683574	0.517163	UP
Clic6	-2.2909	0.0683994	0.517181	DOWN
Cnp	-0.521459	0.0685183	0.517181	DOWN
2610301B20Rik	0.309025	0.0685229	0.517181	UP
Crygn	-0.914548	0.068541	0.517181	DOWN
Acot12	0.378154	0.0685443	0.517181	UP
B430306N03Rik	-1.44572	0.0686083	0.517238	DOWN
Glce	0.240461	0.0686256	0.517238	UP
Khdrbs2	-1.51393	0.068691		DOWN
Iars2	0.238277	0.0687182	0.517657	UP
Clpx	0.417914	0.0687623	0.517711	UP
Fam185a	0.281962	0.0688221	0.517728	UP
Eef1akmt4	1.58079	0.0688383	0.517728	UP
Prkrip1	0.342682	0.0688795	0.51776	UP
Nol10	0.324983	0.0690174	0.518518	UP
Zfp846	0.712689	0.0691097	0.518859	UP
Aspm	-1.1981	0.0691684	0.518859	DOWN
Selenoo	-0.27622	0.0691738	0.518859	DOWN
Wdr11	-0.381601	0.0692147	0.518888	DOWN
Arpc5	0.218449	0.0693074	0.519305	UP
Vps54	0.186564	0.0693745	0.519524	UP
Adamts3	-1.92351	0.0694582	0.519524	DOWN
Cct7	-0.175008	0.0694826	0.519524	DOWN
Fam173a	-0.322585	0.0694848	0.519524	DOWN
Hdhd2	-0.21712	0.0696067	0.519746	DOWN
Lsmem1	-2.05888	0.0696067	0.519746	DOWN
Rpl35a	-0.216285	0.0696402	0.519746	DOWN
Slamf9	-1.02855	0.0696662	0.519746	DOWN
Scaper	-0.306398	0.0696999	0.519746	DOWN
Idua	0.356122	0.0698703	0.52074	UP
Ifit3b	-0.661555	0.0699578	0.520759	DOWN
Aif1	-1.11322	0.0700454	0.520759	DOWN
Actg1	0.468614	0.0700535	0.520759	UP
Son	0.219065	0.0700543	0.520759	UP
Gsk3b	0.290237	0.0700586	0.520759	UP
Bcam	-0.425753	0.0702735	0.521898	DOWN
Usf3	0.216738	0.0702863	0.521898	UP
Vrk1	-0.285335	0.0703748	0.522279	DOWN
Abcd3	0.265509	0.0705659	0.522995	UP
Phpt1	-0.304022	0.0705774	0.522995	DOWN
Smarcd3	-0.9932	0.0705981	0.522995	DOWN
Olfr381	-1.33195	0.0705993		DOWN
Rab6a	0.158848	0.0706213	0.522995	UP
Abhd18	-0.446732	0.0706665	0.522995	DOWN
Fech	-0.215816	0.0706951	0.522995	DOWN
Ticam2	-1.69587	0.0710332		DOWN
Actr1a	0.143885	0.0710351	0.524646	UP
Vps35l	-0.215389	0.0710548	0.524646	DOWN
Rasd1	1.10322	0.0710773	0.524646	UP
Mlx	0.287301	0.0711226	0.524646	UP
Rab5b	-0.127591	0.0711385	0.524646	DOWN
Actc1	1.93228	0.0711429	0.524646	UP
Mmp28	-1.60139	0.0712414	0.524704	DOWN
Csf1	0.599182	0.0712663	0.524704	UP
Angpt2	-0.907336	0.0712762	0.524704	DOWN
Thsd4	0.729872	0.0713005	0.524704	UP
Dnajb11	0.44894	0.0713743	0.524972	UP
Becn1	0.577832	0.0714522	0.52527	UP
Zfp654	0.242478	0.0715558	0.525755	UP
Eif3j2	0.239534	0.0716016	0.525816	UP
Naa15	0.162293	0.0717343	0.526382	UP
Saal1	-1.02913	0.0717537	0.526382	DOWN
Olfr889	2.0463	0.07181		UP
Cacul1	0.163027	0.0718849	0.526627	UP
Pdlim5	0.236772	0.0718974	0.526627	UP
Acat3	-0.381385	0.0718998	0.526627	DOWN
Dpysl3	-0.743968	0.0719593	0.526787	DOWN
Axl	-0.423829	0.0721595	0.527977	DOWN
Gm10912	-1.89807	0.0722136		DOWN
Osgin2	-0.806429	0.072214	0.5281	DOWN
Acta2	-0.812074	0.0722746	0.528244	DOWN
Rps25	0.242608	0.072309	0.528244	UP
Il17rc	-0.368021	0.0724528	0.529019	DOWN
Ago3	-0.262121	0.0725051	0.529125	DOWN
Vmn1r89	-2.25077	0.0725425		DOWN
1190007I07Rik	-0.389447	0.0725771	0.529198	DOWN
Rnf123	-0.240977	0.0726137	0.529198	DOWN
[truncated: 19,839 more rows]

## Sheet: Liver (6h)
Gene name	L2FC	P-VALUE	P-ADJ	DIRECTION
Pfkm	22.0205	2.68059e-30	4.46828e-26	UP
Atp2b3	15.6048	3.65621e-20	3.04727e-16	UP
Xlr4a	-20.5323	2.78968e-19	1.55004e-15	DOWN
Acbd7	-14.6356	7.18023e-16	2.99218e-12	DOWN
Mfrp	-16.1769	7.55926e-15	2.52011e-11	DOWN
Prom2	-15.0435	7.96694e-13	2.21335e-09	DOWN
Eddm3b	-17.6856	1.35968e-10	3.2378e-07	DOWN
Gm45837	-22.0697	1.79408e-10	3.48001e-07	DOWN
Nrbp2	6.15576	1.87894e-10	3.48001e-07	UP
Paxx	-3.67702	5.66041e-06	0.00943534	DOWN
Slc39a3	6.582	1.3881e-05	0.0203354	UP
Stxbp1	-4.55113	1.46395e-05	0.0203354	DOWN
Xirp2	4.3954	1.6606e-05	0.0212928	UP
Mdm1	1.4937	3.71621e-05	0.0442468	UP
Tbc1d19	-4.98065	6.32177e-05	0.0702517	DOWN
Nbdy	-1.17464	9.48421e-05	0.0988077	DOWN
Brd1	-1.6234	0.000104875	0.102833	DOWN
Meis1	-2.45883	0.000154761	0.143317	DOWN
Hdac7	-1.251	0.00018364	0.161111	DOWN
Plxnb2	-6.40454	0.000220644	0.183896	DOWN
Rab6a	0.307355	0.000346185	0.249138	UP
Actn2	3.49466	0.000352572	0.249138	UP
Tmem131l	-0.883007	0.000356466	0.249138	DOWN
Rgs19	-1.63599	0.000358709	0.249138	DOWN
Art3	-1.82779	0.000386635	0.252702	DOWN
Plxnd1	-0.923761	0.000394159	0.252702	DOWN
Alkbh5	0.243548	0.000493487	0.304664	UP
Slc2a3	2.4912	0.000532762	0.317165	UP
Ncapd2	-0.993119	0.000592763	0.333854	DOWN
Socs2	-1.41056	0.000600854	0.333854	DOWN
Psat1	2.10044	0.000653573	0.351432	UP
Myl2	1.91181	0.000680087	0.354262	UP
Mtfmt	-0.596981	0.000822738	0.410797	DOWN
Stk38	-3.57348	0.000858616	0.410797	DOWN
Prkab2	0.956531	0.000862553	0.410797	UP
Tada2a	-0.699119	0.000967105	0.447796	DOWN
Rbm15	0.492761	0.00104813	0.464337	UP
Unc45b	0.98502	0.0010794	0.464337	UP
Cdc14a	-1.56053	0.00111348	0.464337	DOWN
Klhdc7a	-1.23261	0.00111425	0.464337	DOWN
Tctn1	-1.03516	0.00119588	0.484079	DOWN
Fabp3	1.70327	0.00121971	0.484079	UP
Fam89a	-1.59343	0.00125428	0.486225	DOWN
Zfp830	0.448586	0.00136227	0.508651	UP
Dapk1	-0.869136	0.00137317	0.508651	DOWN
Chd1	0.474955	0.00148988	0.533728	UP
Mark4	-2.51645	0.0015049	0.533728	DOWN
Fzd9	2.88895	0.00158657	0.546701	UP
Exoc3l	-4.86082	0.00160708	0.546701	DOWN
Dhrs3	-0.713165	0.00170661	0.568949	DOWN
Fbxo21	-0.867935	0.00185572	0.588519	DOWN
Ralgps1	-1.27685	0.00186737	0.588519	DOWN
Vsig10	-3.92428	0.00187123	0.588519	DOWN
Arhgap18	-1.16814	0.00192878	0.590955	DOWN
Gna12	-0.409119	0.00196528	0.590955	DOWN
Pold1	-1.7421	0.00198533	0.590955	DOWN
Tifab	-1.29907	0.00209272	0.611992	DOWN
Apba1	1.97694	0.00216001	0.612967	UP
Srl	3.15668	0.0021696	0.612967	UP
3110082I17Rik	-0.991761	0.00227165	0.631101	DOWN
Tomm22	-3.57009	0.00235571	0.643728	DOWN
Haus5	-0.827398	0.00248646	0.661545	DOWN
Paip1	0.27272	0.0025388	0.661545	UP
Rab11fip5	-1.14631	0.00254858	0.661545	DOWN
Sipa1l3	-2.34613	0.00264566	0.661545	DOWN
Keg1	-1.23203	0.00264875	0.661545	DOWN
Ppp1r3a	3.23858	0.00265904	0.661545	UP
Lpcat1	-4.98717	0.00284443	0.69664	DOWN
Rgs16	-1.89884	0.00288369	0.69664	DOWN
Zfp148	2.21159	0.00299419	0.70102	UP
Clk2	-0.920225	0.00299612	0.70102	DOWN
Ccsap	-1.81319	0.00304461	0.70102	DOWN
Col22a1	3.2158	0.00307004	0.70102	UP
Gm6377	-2.07119	0.00320057	0.720949	DOWN
Nup85	-0.351873	0.00327775	0.728492	DOWN
Zfp281	0.433301	0.00335695	0.735016	UP
Myl3	1.4461	0.0033953	0.735016	UP
Nt5m	-1.21502	0.00343984	0.735112	DOWN
Nrep	-1.17263	0.00352128	0.737035	DOWN
Aebp2	0.316315	0.00356305	0.737035	UP
Kcnmb1	3.26943	0.00358149	0.737035	UP
Zfp512b	-0.451434	0.00382076	0.758779	DOWN
Eno2	3.49657	0.00390094	0.758779	UP
Cyp3a41a	-22.2198	0.00394907	0.758779	DOWN
Dclk3	-2.26814	0.00396032	0.758779	DOWN
Hivep2	0.546224	0.00397479	0.758779	UP
Rab33b	0.396087	0.00409604	0.758779	UP
Pcf11	0.408489	0.00411522	0.758779	UP
Exoc5	0.306999	0.00413411	0.758779	UP
Mfap1b	0.303045	0.00415946	0.758779	UP
Bmi1	0.346223	0.0041738	0.758779	UP
Lnx1	-1.15303	0.00418788	0.758779	DOWN
Ggps1	0.354283	0.00441952	0.792139	UP
Ppp3cc	-0.706017	0.00457971	0.812118	DOWN
Stxbp3	0.285925	0.00467985	0.81505	UP
Ikzf5	0.338104	0.00469403	0.81505	UP
1810043G02Rik	-0.719663	0.00480256	0.8189	DOWN
Arhgap5	0.431699	0.00481446	0.8189	UP
Hes6	-0.548439	0.00495121	0.827882	DOWN
Arrdc3	-1.44828	0.00501867	0.827882	DOWN
Relt	-2.29407	0.00505218	0.827882	DOWN
Hps6	-0.726328	0.00508638	0.827882	DOWN
Rsbn1	0.443251	0.0051156	0.827882	UP
Wdr47	0.827713	0.00527563	0.840601	UP
Klf3	0.649409	0.00529505	0.840601	UP
Satb1	-1.63327	0.00539209	0.847932	DOWN
Cend1	1.95356	0.00545911	0.850448	UP
Bcar1	-0.631975	0.00559556	0.858601	DOWN
Lst1	-1.24015	0.00561447	0.858601	DOWN
Ggt7	3.54296	0.00573984	0.863295	UP
Slain2	0.307893	0.00581127	0.863295	UP
Lyz1	-3.17115	0.00589379	0.863295	DOWN
Sept2	0.233171	0.00593796	0.863295	UP
Gpr137b	-1.14862	0.00595796	0.863295	DOWN
Sh3tc1	-2.45602	0.00604856	0.863295	DOWN
Igtp	-0.691228	0.00605554	0.863295	DOWN
Comt	-0.805633	0.00605948	0.863295	DOWN
Alms1	-1.03886	0.00613186	0.865558	DOWN
Col4a6	3.22318	0.00617922	0.865558	UP
Iqce	-1.46307	0.0063085	0.876304	DOWN
Dnajc21	0.377146	0.00642816	0.882912	UP
E2f3	-0.476311	0.00646201	0.882912	DOWN
Btk	-1.88962	0.00688834	0.933509	DOWN
Fmnl1	-1.67132	0.00699823	0.934597	DOWN
Gm34653	3.17627	0.00712517	0.934597	UP
Gpalpp1	0.341443	0.00715386	0.934597	UP
Sec61a2	-0.700199	0.00728316	0.934597	DOWN
Irgm2	-0.676237	0.00728337	0.934597	DOWN
Nek2	-1.03901	0.00728803	0.934597	DOWN
Rora	0.504859	0.00735206	0.934597	UP
Plgrkt	-0.632717	0.00738975	0.934597	DOWN
Per3	-1.30598	0.00740097	0.934597	DOWN
Yme1l1	0.221931	0.00753762	0.938868	UP
Ypel3	-0.707861	0.00756762	0.938868	DOWN
Cdk19	-2.50873	0.00765321	0.938868	DOWN
Pafah1b1	0.18949	0.00770107	0.938868	UP
Nlrx1	-0.553546	0.00780707	0.938868	DOWN
Pcdh18	-2.90342	0.00781196	0.938868	DOWN
Megf6	-2.46162	0.00783924	0.938868	DOWN
Olfr1310	2.34257	0.00788538	0.938868	UP
Pbk	-2.81431	0.0079448	0.939233	DOWN
Tmem206	-1.15821	0.00808218	0.944157	DOWN
Siah1a	0.345767	0.00811296	0.944157	UP
Cops2	0.269344	0.00815637	0.944157	UP
Tmem129	-1.42573	0.00834567	0.95554	DOWN
Nkapl	-2.27322	0.00836936	0.95554	DOWN
Plekhg5	-0.736557	0.00850811	0.961534	DOWN
Mcm10	-0.881913	0.00868442	0.961534	DOWN
Icos	-2.11054	0.0087261	0.961534	DOWN
Adh4	-0.693914	0.00882614	0.961534	DOWN
Lypd1	1.87304	0.00887898	0.961534	UP
Zfp420	-4.01171	0.00888442	0.961534	DOWN
Lgalsl	0.466733	0.00893131	0.961534	UP
Slc7a6	1.18371	0.0089801	0.961534	UP
Klhl26	-0.661355	0.00899288	0.961534	DOWN
Mapre3	-0.361917	0.00902874	0.961534	DOWN
Phf20	0.784345	0.0090816	0.961534	UP
Slc8a1	2.96698	0.00914361	0.961534	UP
Vcpip1	0.284905	0.00935871	0.961534	UP
Gpr157	-0.810324	0.00949417	0.961534	DOWN
Slc35f1	2.82597	0.00949642	0.961534	UP
Tiam2	-3.04586	0.0094966	0.961534	DOWN
Wdr13	-0.476162	0.00955248	0.961534	DOWN
Nbea	-2.22215	0.00960354	0.961534	DOWN
Uggt2	-3.39955	0.00968553	0.961534	DOWN
Olfr1385	-2.69966	0.00975838	0.961534	DOWN
Rab3b	-2.94295	0.00983836	0.961534	DOWN
Rbbp8	3.85139	0.0100042	0.961534	UP
Bmpr2	0.278971	0.0100373	0.961534	UP
Elf4	-1.06782	0.010098	0.961534	DOWN
Batf3	-2.72173	0.0100994	0.961534	DOWN
Rinl	-2.18431	0.0101087	0.961534	DOWN
Foxn2	0.353916	0.0101118	0.961534	UP
Ccdc77	0.809699	0.0101694	0.961534	UP
Abr	-0.945267	0.0101876	0.961534	DOWN
Smad9	-1.27351	0.0102241	0.961534	DOWN
Ap3m2	-1.02686	0.0102669	0.961534	DOWN
Depdc5	-0.543565	0.0102698	0.961534	DOWN
Stard4	-0.649637	0.010367	0.961534	DOWN
Arhgef2	-0.720121	0.0103831	0.961534	DOWN
Wnt9a	-1.15331	0.0105726	0.973671	DOWN
Phlpp1	-0.346073	0.0107006	0.980043	DOWN
Kbtbd11	-2.09343	0.0108169	0.985287	DOWN
Gulp1	-3.04407	0.0112631	1	DOWN
Rassf1	0.681729	0.0112919	1	UP
Actc1	1.64975	0.0113561	1	UP
Zfp800	0.514221	0.0114068	1	UP
Armcx6	-3.04565	0.0114541	1	DOWN
Pqlc1	-0.641171	0.0114865	1	DOWN
Zfp131	0.292963	0.0115889	1	UP
Eif4g2	0.185169	0.011589	1	UP
Syne3	-1.19525	0.0116544	1	DOWN
Myom3	1.2758	0.0117768	1	UP
4931428F04Rik	-1.34863	0.0118301	1	DOWN
Ago1	-0.397139	0.0118831	1	DOWN
Guf1	0.373134	0.0121871	1	UP
Nap1l1	0.703494	0.0122224	1	UP
Capn3	-1.82032	0.0122896	1	DOWN
Spata13	-0.650374	0.0123033	1	DOWN
Serpinb9	-0.51349	0.0123129	1	DOWN
Arhgdib	-0.584434	0.0123318	1	DOWN
Rbm27	0.260036	0.0123774	1	UP
Wscd1	-2.61423	0.0123827	1	DOWN
Msc	-2.78966	0.0124242	1	DOWN
Ppp4r3b	0.266253	0.012431	1	UP
Gm4952	-0.849486	0.0126815	1	DOWN
Dbp	-1.31576	0.0127155	1	DOWN
Rc3h2	0.264743	0.0127429	1	UP
Thap12	0.288303	0.0128023	1	UP
Madd	-0.713068	0.0128522	1	DOWN
Ccr1	-1.91711	0.0129925	1	DOWN
Ccar1	0.277705	0.0131062	1	UP
Rmc1	-0.380218	0.0131576	1	DOWN
Prkd3	-0.513272	0.0132128	1	DOWN
Ptpro	-2.35492	0.0134555	1	DOWN
Kansl1	0.350582	0.0135062	1	UP
Pml	-0.572727	0.0135418	1	DOWN
Trem2	-2.8958	0.0135575	1	DOWN
Dhrs7	-0.480382	0.0137147	1	DOWN
Sirpa	-0.713018	0.0137609	1	DOWN
Adprhl1	2.64466	0.0138782	1	UP
Snrpn	-0.42462	0.0139602	1	DOWN
Hrc	2.64352	0.0139834	1	UP
Rasa2	0.689482	0.0140585	1	UP
Trappc13	0.203318	0.0141346	1	UP
Frzb	-1.15515	0.0141477	1	DOWN
Ak1	-2.22599	0.0141864	1	DOWN
Sfi1	-0.655407	0.0142054	1	DOWN
Cdk16	-0.231538	0.0142138	1	DOWN
Bud13	0.534926	0.0142832	1	UP
Slc9a8	-0.550132	0.0143717	1	DOWN
Bzw1	0.226975	0.0144216	1	UP
Zfp532	-0.768177	0.0144335	1	DOWN
Phf13	0.402696	0.0146236	1	UP
Chrm3	-1.7355	0.0146679	1	DOWN
Dnaaf5	-0.336917	0.0146839	1	DOWN
Hars2	-0.275493	0.0148103	1	DOWN
Smc5	0.318331	0.0148185	1	UP
Ankrd40	0.25943	0.0149353	1	UP
Cyp2b10	1.67858	0.0150459	1	UP
Otud7b	0.278852	0.0150661	1	UP
Zmynd8	-0.475548	0.015068	1	DOWN
Lair1	-1.13003	0.0150686	1	DOWN
Tspan15	-1.0409	0.0152741	1	DOWN
Dctn6	0.548494	0.0153024	1	UP
Osbpl5	-1.15164	0.0153106	1	DOWN
Ntan1	0.818918	0.0153805	1	UP
2310002L09Rik	2.73599	0.0154648	1	UP
Hmga1	-2.56666	0.0156763	1	DOWN
Slc25a34	0.747375	0.0157854	1	UP
Slc7a7	-0.829973	0.0157911	1	DOWN
Trim43b	3.0016	0.0158148	1	UP
Usp7	-0.773615	0.015837	1	DOWN
Rbm24	2.73693	0.0158421	1	UP
Slit3	1.67159	0.0158653	1	UP
Ifi27l2b	-0.847028	0.0158662	1	DOWN
Npr1	-0.7264	0.015965	1	DOWN
Slc25a15	0.519623	0.0161983	1	UP
Yy1	0.182812	0.0162728	1	UP
Ranbp2	0.227414	0.0162876	1	UP
Inka2	2.63591	0.0163049	1	UP
P2ry6	-1.26616	0.0163418	1	DOWN
Rnf19b	-0.472506	0.0163945	1	DOWN
Hsd3b5	-1.59377	0.0164039	1	DOWN
Ddx6	0.208995	0.0164135	1	UP
Mpdz	-0.640886	0.0164552	1	DOWN
Ajuba	-1.11085	0.0165841	1	DOWN
Cep19	-0.672109	0.0167679	1	DOWN
Cfdp1	0.243798	0.0167857	1	UP
Rel	0.509736	0.0167876	1	UP
Tkfc	-0.498208	0.0168129	1	DOWN
Was	-1.40022	0.0168773	1	DOWN
Pomk	-0.576546	0.0169371	1	DOWN
Dnaaf2	-0.705438	0.0169654	1	DOWN
Emp2	-0.524223	0.0171013	1	DOWN
Prrt4	2.84334	0.0172538	1	UP
Mrgpre	-0.996178	0.0173662	1	DOWN
Nol4l	-1.19423	0.0174058	1	DOWN
Fap	-2.67072	0.0174684	1	DOWN
Tulp3	-0.820413	0.0175857	1	DOWN
Arrdc1	-1.38516	0.0176709	1	DOWN
Trim25	-0.425455	0.0176923	1	DOWN
Pdlim7	-0.814504	0.0177125	1	DOWN
Kif5b	0.319112	0.0178196	1	UP
Eif2s3x	0.163957	0.0180409	1	UP
Clec4a2	-1.1514	0.0180548	1	DOWN
Gjc2	-2.71894	0.0180781	1	DOWN
Gm20708	-4.89107	0.0181092	1	DOWN
Cfap298	-2.9029	0.0181747	1	DOWN
Trmt13	2.85639	0.0181891	1	UP
Atn1	-0.381613	0.0182441	1	DOWN
Rassf8	-0.423033	0.0183126	1	DOWN
Atf2	0.242165	0.0184554	1	UP
Pno1	0.288964	0.018463	1	UP
Mreg	-0.516076	0.018478	1	DOWN
Fcer1g	-0.719688	0.0184947	1	DOWN
Mindy2	0.35483	0.0187146	1	UP
Zfp52	-1.28608	0.0187957	1	DOWN
Pea15a	-0.568899	0.0188007	1	DOWN
Slc1a4	0.899021	0.0188021	1	UP
Mboat2	2.69639	0.0188752	1	UP
Cacnb1	-2.42245	0.018916	1	DOWN
Slc12a7	-0.460439	0.0190595	1	DOWN
Abcc1	-0.871227	0.0192447	1	DOWN
Ccnt1	0.26877	0.0192593	1	UP
Dok4	-1.28844	0.019303	1	DOWN
Fbxl18	-0.366522	0.0196858	1	DOWN
Ppp1r7	0.230082	0.0198468	1	UP
Pcdh9	-2.68551	0.0199735	1	DOWN
Ap5m1	0.311976	0.0199831	1	UP
Fam129a	-0.703663	0.0200273	1	DOWN
Rcsd1	-0.491097	0.0200435	1	DOWN
Spryd7	0.30569	0.0200659	1	UP
Pter	-0.482743	0.0204488	1	DOWN
Zgrf1	-2.63931	0.0204752	1	DOWN
Tepsin	-0.39946	0.0204914	1	DOWN
Cd79b	-2.08332	0.0204952	1	DOWN
Stk3	0.304757	0.020593	1	UP
Dusp16	0.385264	0.0206205	1	UP
Ssbp3	-0.459814	0.0207175	1	DOWN
Pitpnm3	2.72613	0.0207225	1	UP
Aff4	0.332388	0.0208599	1	UP
Nrap	1.96137	0.0209241	1	UP
Zfp280d	0.389687	0.0209629	1	UP
Dcaf5	-0.186844	0.0209782	1	DOWN
Pla2g12a	0.410669	0.0210627	1	UP
Msx1	-1.61236	0.0211993	1	DOWN
Lsm14a	0.199279	0.0213436	1	UP
Ddx52	0.201356	0.0214457	1	UP
Phf23	0.341304	0.0214472	1	UP
Rnf219	-0.752113	0.0214523	1	DOWN
Pgm2l1	-0.940784	0.0214815	1	DOWN
Mtdh	0.252396	0.0216103	1	UP
Gpd1l	-0.366407	0.0216879	1	DOWN
E2f2	-1.64255	0.0217333	1	DOWN
Hebp2	-2.18314	0.0218308	1	DOWN
Noct	0.399844	0.0219051	1	UP
Reep3	0.277945	0.0220046	1	UP
Ppp2r5e	0.257117	0.0220072	1	UP
Yod1	0.443747	0.0221035	1	UP
Als2cl	1.07049	0.022183	1	UP
Serinc3	0.341852	0.0221974	1	UP
Ngfr	-1.28109	0.0222463	1	DOWN
Dcdc2c	1.97462	0.0223312	1	UP
Hpgds	-1.31694	0.0223699	1	DOWN
Chrna4	-2.18108	0.0223802	1	DOWN
Numbl	-1.34252	0.0225576	1	DOWN
Kpnb1	0.2109	0.0225616	1	UP
Tox4	0.182589	0.0225868	1	UP
F13a1	-1.80317	0.0227772	1	DOWN
Tmem30a	0.181874	0.0227816	1	UP
Spi1	-0.8876	0.0228988	1	DOWN
Nme4	-1.05144	0.0229601	1	DOWN
Zfp687	-0.665382	0.0229708	1	DOWN
Wdr48	0.22207	0.023101	1	UP
Stk11ip	-1.28589	0.0231058	1	DOWN
Shld2	0.554456	0.0231727	1	UP
Arl2	-0.55477	0.0232417	1	DOWN
Myo9a	-0.520134	0.0233057	1	DOWN
Sfxn5	-0.530584	0.0233796	1	DOWN
Hnrnpf	0.200007	0.0234054	1	UP
Chm	0.324922	0.0236191	1	UP
Onecut1	-1.1523	0.023634	1	DOWN
March7	0.355268	0.0236806	1	UP
Wnt11	2.53639	0.0238712	1	UP
Gm5141	-2.28863	0.0238987	1	DOWN
Wdr66	-1.76566	0.0239198	1	DOWN
Armcx5	0.511209	0.023977	1	UP
Hoxa3	1.64553	0.0240708	1	UP
Irf5	-0.77	0.024104	1	DOWN
Gm5447	3.3664	0.0241134	1	UP
Zmpste24	0.270632	0.0242105	1	UP
3300002I08Rik	4.14356	0.0245038	1	UP
Il2ra	-1.84438	0.0245877	1	DOWN
Cggbp1	0.240594	0.0246324	1	UP
Bclaf3	0.593085	0.0247455	1	UP
Katnb1	-0.672734	0.0247627	1	DOWN
Zfp654	0.303755	0.0247929	1	UP
Pde4a	-1.04261	0.0248516	1	DOWN
Mfsd7a	-1.27995	0.0248627	1	DOWN
Sac3d1	-0.635885	0.0249578	1	DOWN
Sertad1	0.635772	0.0249584	1	UP
Golph3l	-0.394928	0.0249989	1	DOWN
Camk2a	-2.4304	0.0250766	1	DOWN
Vps18	-1.50232	0.0251339	1	DOWN
Myo5a	-1.29172	0.0251524	1	DOWN
Cachd1	-1.04911	0.0252468	1	DOWN
Itpka	-1.88588	0.0253009	1	DOWN
Ms4a4c	-1.93723	0.0253072	1	DOWN
Cdkl3	2.09971	0.0253514	1	UP
Hipk4	2.49408	0.0254669	1	UP
Arvcf	-0.722257	0.0254722	1	DOWN
Gprc5a	2.00993	0.0255149	1	UP
Il1b	-1.42294	0.025622	1	DOWN
Slc25a18	2.74103	0.0256284	1	UP
Gm2026	2.13226	0.0257124	1	UP
Brca2	-1.26861	0.0257469	1	DOWN
Zfp180	0.333822	0.0257553	1	UP
Zfp866	0.361048	0.0258719	1	UP
Tmem150a	-0.359643	0.026035	1	DOWN
Mov10	-0.491298	0.0260457	1	DOWN
Tpra1	-0.456401	0.026091	1	DOWN
Fmr1nb	2.84607	0.0262092	1	UP
Herpud2	0.199451	0.0262839	1	UP
Nusap1	-1.261	0.0263493	1	DOWN
Itgax	-1.77994	0.0265614	1	DOWN
Cytl1	-2.57614	0.0266313	1	DOWN
Thnsl1	-0.514931	0.0267836	1	DOWN
Gcc2	0.440638	0.0268274	1	UP
Tbrg4	-0.519983	0.0268639	1	DOWN
Adam19	-1.34748	0.0268708	1	DOWN
Fbxw5	-0.258874	0.0269209	1	DOWN
Tomt	-3.04452	0.0269347	1	DOWN
Inpp5k	-0.802591	0.0269439	1	DOWN
Enho	-0.703618	0.0270385	1	DOWN
Zbtb41	0.302249	0.0270513	1	UP
Pdzd8	0.303982	0.0271279	1	UP
Cyb561a3	-0.566077	0.0272048	1	DOWN
Zfp212	0.304943	0.0272523	1	UP
Ankrd33b	0.564535	0.0272793	1	UP
Raph1	0.582346	0.0273287	1	UP
Mmp15	-0.582086	0.0273315	1	DOWN
Lmo2	-0.623757	0.0273365	1	DOWN
Map4k1	-1.9411	0.0273701	1	DOWN
Gabpa	0.234793	0.0275534	1	UP
Ehmt1	-0.273166	0.0277073	1	DOWN
Ulbp1	-2.02845	0.0277685	1	DOWN
Cobll1	0.435041	0.0278747	1	UP
Cd300ld3	-2.74449	0.02795	1	DOWN
Vrk2	-0.493146	0.0279824	1	DOWN
Dennd1b	0.66965	0.0281854	1	UP
Wnt5a	-0.623142	0.0282865	1	DOWN
Sprtn	0.351713	0.0283123	1	UP
Anapc15	-0.441119	0.0283402	1	DOWN
Mapt	-0.981001	0.0283557	1	DOWN
Adgre1	-2.84061	0.0284911	1	DOWN
Incenp	-0.809836	0.0284983	1	DOWN
Fam221a	2.48304	0.0285192	1	UP
Irx1	-1.3921	0.0286757	1	DOWN
Il15	-2.01566	0.0288085	1	DOWN
Mfsd2b	3.58219	0.0288453	1	UP
Trpc2	3.4777	0.0289191	1	UP
Mettl6	0.308337	0.0289247	1	UP
Kank1	-0.49685	0.0289925	1	DOWN
Usp31	0.436326	0.0290904	1	UP
Ccdc88c	-0.985076	0.0291761	1	DOWN
Cd209c	1.64127	0.0292081	1	UP
Btaf1	0.316028	0.0292287	1	UP
Otud6b	0.283835	0.0296884	1	UP
Khdrbs1	0.234728	0.0299339	1	UP
Colca2	-2.47838	0.0299694	1	DOWN
Dtx3	-0.684528	0.0300054	1	DOWN
Thoc2	0.300028	0.0301314	1	UP
Cdh6	-2.19782	0.0303679	1	DOWN
Ptpn9	-0.452924	0.030404	1	DOWN
Oat	0.323121	0.0304098	1	UP
Mtss1l	-0.753916	0.0305589	1	DOWN
Commd7	-0.334827	0.0307099	1	DOWN
Ccdc15	1.1872	0.0309014	1	UP
Ppp1cb	0.305035	0.0310021	1	UP
Mrnip	-1.13941	0.0310975	1	DOWN
Rps6ka5	-0.886523	0.0311213	1	DOWN
Gm14399	0.954523	0.0311783	1	UP
Ap3m1	0.249286	0.0312612	1	UP
Slc29a3	-0.622597	0.0312641	1	DOWN
Gdpgp1	-0.49701	0.031466	1	DOWN
Fgf11	-1.55026	0.031556	1	DOWN
Otulinl	-1.01669	0.031681	1	DOWN
Zfr	0.234369	0.0318996	1	UP
Ldb3	2.26166	0.0319652	1	UP
Selenok	0.399916	0.0320414	1	UP
Plppr2	-0.555412	0.0322649	1	DOWN
Snx32	-0.827792	0.0324857	1	DOWN
Cadm3	-1.04748	0.0325024	1	DOWN
Mfsd14b	0.237982	0.0327718	1	UP
Csk	-0.328166	0.0327919	1	DOWN
Epb41	0.481483	0.0328186	1	UP
D11Wsu47e	-0.469686	0.0328366	1	DOWN
Tbl1xr1	0.348013	0.0328604	1	UP
Ergic2	0.222626	0.0329248	1	UP
Ppp1r18	-0.609127	0.0329251	1	DOWN
Naa15	0.186382	0.0329311	1	UP
Fyttd1	0.268502	0.0330121	1	UP
Nod1	-0.460972	0.0330928	1	DOWN
Rhog	-0.314852	0.0331045	1	DOWN
Ube3a	0.246832	0.033137	1	UP
Galnt11	0.297034	0.0332407	1	UP
Lpcat4	-2.16708	0.0332783	1	DOWN
Nrd1	0.179485	0.0333378	1	UP
Ccdc47	0.209907	0.0334226	1	UP
Lrrn3	-1.94369	0.0334815	1	DOWN
Plcl1	0.846758	0.0336029	1	UP
Usf1	-0.323275	0.033637	1	DOWN
Rhof	-1.66796	0.0336453	1	DOWN
Krt222	2.29609	0.0336593	1	UP
Smarcc1	-0.24218	0.0338944	1	DOWN
Wdr89	-0.541412	0.0341101	1	DOWN
Olfr1564	-2.43235	0.0343937	1	DOWN
Rab3a	-0.649983	0.0346154	1	DOWN
Zfp507	0.294441	0.0348804	1	UP
Rph3al	-0.844553	0.0348971	1	DOWN
Serinc1	0.226323	0.0349106	1	UP
Pltp	-0.586654	0.0349703	1	DOWN
Purb	0.272209	0.0349719	1	UP
Ugcg	-0.426063	0.0350023	1	DOWN
Myom2	2.24804	0.0350264	1	UP
Tnnt2	1.34955	0.0350568	1	UP
Ffar4	1.27074	0.0353358	1	UP
Olfr393	-1.79555	0.0354234	1	DOWN
Sema7a	-2.2188	0.0354743	1	DOWN
Ccdc89	-2.10416	0.0356063	1	DOWN
Snai3	-2.11479	0.0357101	1	DOWN
Rtl3	2.61657	0.0358725	1	UP
Vash2	2.65097	0.0360115	1	UP
Esrrg	1.07918	0.0360787	1	UP
Efna5	0.659025	0.0360925	1	UP
Akna	-0.821409	0.0362373	1	DOWN
Csf2ra	-0.703235	0.0363331	1	DOWN
E2f7	0.974936	0.0363976	1	UP
Naf1	0.350995	0.0364344	1	UP
Jmjd1c	0.602023	0.0365007	1	UP
Fnip1	0.319703	0.0365074	1	UP
Nfyb	-0.267826	0.0366192	1	DOWN
Ddx60	-0.746617	0.0366668	1	DOWN
Rab11a	0.165959	0.0369395	1	UP
Pkn2	0.276755	0.0371671	1	UP
Gtf2a1	0.237224	0.0371883	1	UP
Usp53	0.474996	0.0371915	1	UP
Gm45799	-2.34161	0.0372348	1	DOWN
Fancg	-1.37899	0.0373783	1	DOWN
Cyp4f18	-1.58832	0.037451	1	DOWN
Rrm1	-0.376207	0.0375167	1	DOWN
Clec10a	-1.72465	0.0376123	1	DOWN
Rtn4rl1	-0.859681	0.037688	1	DOWN
Sh3kbp1	-1.27679	0.0377203	1	DOWN
Pakap	3.91438	0.0378526	1	UP
Dusp27	2.64856	0.0378733	1	UP
Selenot	0.180356	0.038077	1	UP
Megf9	0.464041	0.0380793	1	UP
Trim54	2.4205	0.0381221	1	UP
Tspan6	-1.57687	0.0382198	1	DOWN
Olfr906	-2.22032	0.0384447	1	DOWN
Vegfd	-1.35562	0.0385937	1	DOWN
Ankrd39	-0.844901	0.0385959	1	DOWN
Gm47283	-1.01897	0.038598	1	DOWN
Fam32a	-0.217688	0.0386308	1	DOWN
Vwce	-0.494282	0.0389383	1	DOWN
Cenpa	-1.2059	0.0389512	1	DOWN
Brox	0.180468	0.0389974	1	UP
Zc3h15	0.258974	0.03901	1	UP
Cyb561d1	-0.661481	0.0391929	1	DOWN
Ogt	-0.341306	0.0392206	1	DOWN
Dr1	0.278907	0.0392489	1	UP
Ahcyl2	0.709564	0.03928	1	UP
Pum2	0.189572	0.0392886	1	UP
Lrrc3	-0.504511	0.0393211	1	DOWN
Dpf1	-2.42616	0.0394034	1	DOWN
Slc10a2	0.69832	0.0394547	1	UP
Fut8	0.754413	0.0395653	1	UP
Dusp2	-2.32893	0.0396385	1	DOWN
Strip1	-0.282731	0.0398558	1	DOWN
Setd5	0.253739	0.0400382	1	UP
Tgm1	-0.72	0.0400736	1	DOWN
Cd151	-0.245432	0.0401275	1	DOWN
Gab1	-0.43677	0.0401716	1	DOWN
Anp32e	0.19777	0.0403147	1	UP
Polr2i	-0.376045	0.0403374	1	DOWN
Glis2	-2.27145	0.04038	1	DOWN
Zfp518a	0.352592	0.0404116	1	UP
Csde1	0.216015	0.0406867	1	UP
Ankrd6	-2.13407	0.0408941	1	DOWN
Pex26	-0.457052	0.0409495	1	DOWN
Rarg	-0.647636	0.0410372	1	DOWN
Tnfrsf22	-0.978078	0.0410652	1	DOWN
Snapc5	-0.268972	0.0411341	1	DOWN
Rab10	0.172882	0.041193	1	UP
Il7r	1.71767	0.0412114	1	UP
Rhod	-0.418831	0.0412193	1	DOWN
Asf1b	1.29082	0.0412521	1	UP
Nt5dc1	0.414705	0.0414375	1	UP
Ctxn1	1.54341	0.0415569	1	UP
Sh2b1	0.316414	0.0415624	1	UP
Tceanc	-0.489724	0.0416372	1	DOWN
Brd2	0.240017	0.0416449	1	UP
Akr1b3	-0.352765	0.0416458	1	DOWN
Chd7	0.456716	0.0416873	1	UP
Pak1	-1.67605	0.0416879	1	DOWN
Slc25a51	0.466224	0.0417422	1	UP
Iqcc	-0.426634	0.0420338	1	DOWN
Fam220a	0.348865	0.0420872	1	UP
Rab21	0.140226	0.0422682	1	UP
Pced1a	-1.30168	0.0426844	1	DOWN
Wrnip1	-0.316909	0.0427472	1	DOWN
Lyl1	-1.11084	0.0427831	1	DOWN
Sema3a	1.38531	0.0428847	1	UP
Lrp2bp	-2.66934	0.043076	1	DOWN
Zfp707	-0.424595	0.0431174	1	DOWN
Pear1	1.32405	0.0431296	1	UP
Usp9x	0.210327	0.0431824	1	UP
Plaa	0.198494	0.0434991	1	UP
Prpf40a	0.22549	0.0436084	1	UP
Myrfl	2.52401	0.0436626	1	UP
Eif1a	0.444688	0.0437288	1	UP
Pum1	-0.209005	0.0438158	1	DOWN
Cuta	-0.33381	0.0438208	1	DOWN
Ctc1	-1.03282	0.0438277	1	DOWN
G6pdx	-0.589534	0.0438807	1	DOWN
Mphosph8	0.270408	0.0439703	1	UP
As3mt	0.347531	0.0439973	1	UP
Nexn	0.78971	0.044127	1	UP
Sp8	-2.32834	0.0441345	1	DOWN
Mak16	0.304794	0.0442862	1	UP
Mob4	0.179726	0.0442988	1	UP
Cxcl13	-1.54931	0.0446132	1	DOWN
Mboat4	-2.1687	0.0446654	1	DOWN
Epc2	0.29322	0.0448204	1	UP
Plekhj1	-0.52874	0.0448356	1	DOWN
Mynn	-0.709322	0.0449144	1	DOWN
Topbp1	-0.296885	0.0454243	1	DOWN
Mras	-0.667939	0.0454695	1	DOWN
Olfr1246	2.12605	0.0454971	1	UP
Tsc22d4	-0.5512	0.0455104	1	DOWN
Tnni3	1.38913	0.0456175	1	UP
Myl6b	1.05961	0.0456356	1	UP
Fam189a2	-1.19955	0.0457375	1	DOWN
Bcl9l	0.40208	0.0458094	1	UP
Pole4	0.365562	0.0458339	1	UP
Tmeff1	-2.23788	0.0458912	1	DOWN
Dhx8	0.291957	0.0459323	1	UP
Ate1	0.208098	0.0459824	1	UP
Lxn	-1.93948	0.0461152	1	DOWN
Igsf1	-1.97215	0.0462099	1	DOWN
Gpank1	0.314644	0.0463879	1	UP
Rnaseh2a	-0.345881	0.0466471	1	DOWN
Nynrin	-0.856222	0.0467724	1	DOWN
Zbtb12	-0.7644	0.0468526	1	DOWN
Tmem241	-1.15206	0.0468854	1	DOWN
Arhgap29	-0.493326	0.0469502	1	DOWN
1110002E22Rik	2.21022	0.0470654	1	UP
Gm3550	-2.06645	0.0470679	1	DOWN
Rab2a	0.168458	0.0471065	1	UP
Stx12	0.21285	0.0471801	1	UP
Ociad1	0.20909	0.0472152	1	UP
Col4a3	-1.26953	0.0472598	1	DOWN
Ccng1	0.274146	0.0473686	1	UP
Zscan21	0.214411	0.0473804	1	UP
Acy3	-0.39293	0.0473928	1	DOWN
Senp6	0.270212	0.047394	1	UP
Ift81	-0.771375	0.047446	1	DOWN
Phc3	0.304837	0.0478829	1	UP
Snx10	0.502167	0.0479061	1	UP
Cop1	0.160756	0.0480279	1	UP
Mia2	0.301631	0.0480602	1	UP
Naif1	-0.439267	0.0481489	1	DOWN
Rhobtb1	0.632167	0.0481946	1	UP
Ly6c2	-2.06467	0.0482444	1	DOWN
Peg10	-1.311	0.0482873	1	DOWN
Ifit2	-0.626804	0.0483493	1	DOWN
Csf1	-0.668836	0.0483942	1	DOWN
Odf2l	0.394278	0.0483984	1	UP
Olfr654	-2.30148	0.0485439	1	DOWN
Afdn	0.451378	0.0486268	1	UP
Lig1	-2.12925	0.0490025	1	DOWN
Clec4a3	-0.860295	0.0490176	1	DOWN
Taok1	0.216692	0.0490332	1	UP
Tns3	-0.468035	0.0491233	1	DOWN
Csnk1a1	0.181053	0.04921	1	UP
Rrs1	0.349052	0.0492795	1	UP
Rps6kb1	0.210427	0.0492921	1	UP
Cox4i2	-2.23071	0.0494655	1	DOWN
Itgav	0.274628	0.0495096	1	UP
Med4	0.1837	0.0495233	1	UP
Bclaf1	0.302937	0.0496508	1	UP
Eif4e	0.200513	0.0496714	1	UP
Rmnd5a	0.317169	0.0496763	1	UP
Ttc1	0.213079	0.049824	1	UP
Cyp2u1	-0.522086	0.0498538	1	DOWN
Ifi47	-0.474512	0.0498642	1	DOWN
Ccl19	-3.33848	0.0499287	1	DOWN
L3mbtl3	-0.614402	0.0500572	1	DOWN
Sema5a	-0.847624	0.0501318	1	DOWN
Spag5	-2.22108	0.0502909	1	DOWN
Tax1bp1	0.183604	0.0503489	1	UP
Clcf1	-2.94863	0.0505747	1	DOWN
2210408I21Rik	0.570389	0.0505822	1	UP
Tpp2	0.184011	0.0506569	1	UP
Lsp1	-0.75897	0.0507164	1	DOWN
Ube2d3	0.204277	0.0508479	1	UP
Pde6a	2.46353	0.0509139	1	UP
Fbxo40	1.2048	0.0509408	1	UP
Cdc25a	-0.487343	0.0510128	1	DOWN
Myo9b	-0.297164	0.0510138	1	DOWN
Ppip5k2	0.469321	0.0512748	1	UP
Nxn	-0.855848	0.0513306	1	DOWN
Atp2b2	-2.06419	0.0513965	1	DOWN
Erbb2	-1.12202	0.0514634	1	DOWN
Flnc	1.33327	0.0517037	1	UP
Nbeal1	0.253737	0.0517041	1	UP
Cfd	-2.62904	0.0518071	1	DOWN
Kdm3a	0.304659	0.051812	1	UP
Slc35f6	-0.253846	0.0518844	1	DOWN
Lrch2	1.63157	0.0521103	1	UP
Eif2s2	0.16498	0.0521804	1	UP
Calm3	-0.223645	0.0522691	1	DOWN
Spsb4	-2.09353	0.0523001	1	DOWN
Loxl3	-0.806083	0.0523866	1	DOWN
Ptk2b	-0.353843	0.052389	1	DOWN
Wnt5b	-0.530032	0.0524143	1	DOWN
Nsmaf	-0.272401	0.0524805	1	DOWN
Gm14443	0.366539	0.0525713	1	UP
Srsf1	0.235661	0.0525931	1	UP
Cdc73	0.218618	0.0526813	1	UP
Gm14412	2.39535	0.0526968	1	UP
Gpr146	-0.445318	0.0527153	1	DOWN
Cipc	0.285182	0.0528292	1	UP
Hif1a	0.297285	0.053065	1	UP
Rab24	-0.25254	0.0530919	1	DOWN
Hist1h2ae	-2.48707	0.0531021	1	DOWN
Vps4b	0.164952	0.0531806	1	UP
Rassf10	-2.25496	0.0531833	1	DOWN
Cep104	0.24319	0.0531992	1	UP
Hddc2	-0.892997	0.0537302	1	DOWN
Mkln1	0.182283	0.0537521	1	UP
Txnl1	0.200125	0.0537806	1	UP
Smad4	0.201933	0.0537865	1	UP
Pars2	-0.463703	0.0538641	1	DOWN
Hnrnpa2b1	0.190943	0.0538972	1	UP
Mex3b	-1.80378	0.0542841	1	DOWN
Spsb2	-0.465037	0.0543193	1	DOWN
Pggt1b	0.41099	0.0543836	1	UP
Sh3bp4	-0.64018	0.0544335	1	DOWN
2510009E07Rik	-0.392491	0.0546001	1	DOWN
Olfr361	4.13613	0.0546572	1	UP
Pcdhgb6	-1.81138	0.0547101	1	DOWN
Hmgn5	0.233085	0.0547417	1	UP
Vopp1	-0.389947	0.0548335	1	DOWN
Dtna	-1.72	0.0549184	1	DOWN
Zmym2	0.305547	0.0551125	1	UP
Uchl1	2.35972	0.055174	1	UP
Mindy4	-0.658618	0.0552929	1	DOWN
Suz12	0.199357	0.0552936	1	UP
Zkscan5	-0.243908	0.0553492	1	DOWN
Ap1g2	-1.72037	0.0554395	1	DOWN
Zfp553	0.424701	0.0554802	1	UP
Axl	-0.458449	0.0554931	1	DOWN
Slc18a2	0.528223	0.0555175	1	UP
Actr2	0.167209	0.0556385	1	UP
5730409E04Rik	-0.347876	0.0557524	1	DOWN
Obscn	-2.04885	0.0557775	1	DOWN
Inhba	-0.897556	0.0557931	1	DOWN
Tlr2	-0.775076	0.0558649	1	DOWN
Tmx4	0.202765	0.0559152	1	UP
Bok	-0.530206	0.0560021	1	DOWN
Elmo1	-0.689674	0.0560047	1	DOWN
Pkd2l2	0.461818	0.0560108	1	UP
Ube4a	0.215363	0.056189	1	UP
Hcfc2	0.216672	0.0561958	1	UP
Cc2d1b	-0.300068	0.0563445	1	DOWN
Lrif1	0.347851	0.0563465	1	UP
Msantd3	-2.04388	0.0564148	1	DOWN
Zxdc	0.276025	0.0570379	1	UP
Cln8	0.267045	0.0570409	1	UP
Gprin3	-1.08444	0.0570457	1	DOWN
5830473C10Rik	-0.367362	0.0570701	1	DOWN
Zfp873	-1.03418	0.0571157	1	DOWN
Sh3pxd2b	-0.727958	0.0571901	1	DOWN
Ppil4	0.211522	0.0573117	1	UP
Nelfb	-0.232723	0.0573632	1	DOWN
Trdn	2.15456	0.0573747	1	UP
Gemin5	-0.256815	0.0574292	1	DOWN
Hic1	-0.951939	0.0574804	1	DOWN
Cenph	2.79009	0.0578105	1	UP
Nup133	-0.263548	0.0578614	1	DOWN
Xlr3b	-2.81619	0.0579008	1	DOWN
Lrrc56	-0.694303	0.0579199	1	DOWN
Olfr958	-1.41234	0.0579524	1	DOWN
Drg1	0.209615	0.0579796	1	UP
Zbed3	0.481254	0.0581209	1	UP
Hspa1l	-0.73875	0.0582164	1	DOWN
Pold2	-0.37896	0.058389	1	DOWN
Gm10912	2.55343	0.0588123	1	UP
Arl1	0.169618	0.0588886	1	UP
Pafah1b2	0.182219	0.0590444	1	UP
Calhm2	-0.729544	0.059046	1	DOWN
Apbb2	-1.00356	0.0590541	1	DOWN
Gabarapl2	0.225646	0.0591111	1	UP
Rab9b	-1.98929	0.0591422	1	DOWN
Acta1	2.35956	0.0595375	1	UP
Syncrip	0.240041	0.0596233	1	UP
Aqp8	-0.987969	0.0596478	1	DOWN
Slc7a2	0.587262	0.0596591	1	UP
Gnb2	-0.247632	0.0597714	1	DOWN
Kbtbd6	-2.22509	0.0597971	1	DOWN
Lrrc8c	0.518023	0.0598016	1	UP
Eif1ax	0.187641	0.0599455	1	UP
Rapgef3	0.751486	0.0600132	1	UP
Jak2	-0.291496	0.0600534	1	DOWN
Camkk2	-0.499595	0.0601289	1	DOWN
Grin3b	1.79109	0.0601309	1	UP
Zfp62	0.295657	0.0601667	1	UP
Ddo	-0.433759	0.0601899	1	DOWN
Lasp1	-0.450509	0.0603907	1	DOWN
Wdr70	-0.210445	0.0604036	1	DOWN
Taz	-0.306747	0.0606445	1	DOWN
Kbtbd8	0.629778	0.0606565	1	UP
Fam3a	-0.298047	0.060678	1	DOWN
Casp12	-1.19247	0.0607546	1	DOWN
Mef2c	-0.595052	0.0608961	1	DOWN
Gm10226	-1.57848	0.0609189	1	DOWN
Lcp2	-0.735104	0.061193	1	DOWN
Sh3rf3	-2.19178	0.0613007	1	DOWN
Olfr1423	2.23862	0.061311	1	UP
Sema3c	1.89316	0.0615329	1	UP
Nufip2	0.249618	0.0616078	1	UP
Sec23ip	0.183547	0.061609	1	UP
Fbxo28	0.220446	0.0616345	1	UP
Pnkp	-0.439543	0.0617322	1	DOWN
Ethe1	-0.301154	0.0617605	1	DOWN
Jph1	0.690752	0.0617638	1	UP
Aldh3b1	-0.655774	0.061909	1	DOWN
Myc	-1.03524	0.0620807	1	DOWN
Olfr374	-1.43989	0.0623237	1	DOWN
Smarca5	0.177621	0.0623548	1	UP
Trim30d	-0.468078	0.0624513	1	DOWN
Zfp970	0.420805	0.0627251	1	UP
Ap3b2	-2.52037	0.0627344	1	DOWN
Dixdc1	-0.634984	0.06277	1	DOWN
Mfsd14a	0.165202	0.0628117	1	UP
Zbtb16	0.917679	0.0628361	1	UP
Erbin	0.248495	0.0628703	1	UP
R3hdm4	-0.188961	0.0628955	1	DOWN
Necap1	-0.159499	0.0629296	1	DOWN
Lrrn1	2.09791	0.0629879	1	UP
Sub1	0.269675	0.0630406	1	UP
Tmem63a	-0.287336	0.0632133	1	DOWN
Jade2	0.474616	0.0633217	1	UP
Zfp677	1.40601	0.0633285	1	UP
Orai1	-0.419129	0.063375	1	DOWN
Glipr1	-1.07145	0.0633828	1	DOWN
Cldnd1	0.261322	0.0634685	1	UP
Ppig	0.166255	0.0634743	1	UP
Plcd4	3.27035	0.06349	1	UP
Pde4c	-0.637379	0.0638834	1	DOWN
Zfp266	0.234614	0.0639434	1	UP
Tdp2	-0.786674	0.0639605	1	DOWN
Zfp410	0.496317	0.0640178	1	UP
Sumo2	0.157115	0.064044	1	UP
Map3k1	0.397754	0.0640661	1	UP
Ttc12	1.24232	0.0640779	1	UP
9930021J03Rik	0.472941	0.0641016	1	UP
Lancl3	2.19562	0.064223	1	UP
Gkap1	0.242579	0.0642773	1	UP
Trip13	-2.53224	0.0644523	1	DOWN
Tmf1	0.391635	0.0644854	1	UP
Eif3a	0.199037	0.0645997	1	UP
Slc9a7	-1.39544	0.0646245	1	DOWN
Sowahc	0.515349	0.0647019	1	UP
Mfsd4b4	-0.414984	0.0647117	1	DOWN
Zranb2	-0.399467	0.0647467	1	DOWN
Cdc7	-2.24344	0.0648661	1	DOWN
Coq8a	-0.418094	0.0649192	1	DOWN
Vps37a	0.237528	0.0649581	1	UP
Pknox2	1.76991	0.0649837	1	UP
Cd300a	-0.737021	0.0650696	1	DOWN
Bean1	-2.09395	0.0651027	1	DOWN
Twistnb	0.242322	0.0651519	1	UP
Hacl1	-0.556663	0.0652653	1	DOWN
Ost4	-0.258361	0.0653074	1	DOWN
Nop53	0.365051	0.0653119	1	UP
Slc22a5	0.415387	0.0653465	1	UP
Mpz	-2.15116	0.0653544	1	DOWN
Klhl25	0.402869	0.0654102	1	UP
Vmn1r13	-1.03326	0.0654164	1	DOWN
Fpr1	-0.954708	0.065438	1	DOWN
Ccdc166	-0.94197	0.0655614	1	DOWN
Gpat3	0.638062	0.0657935	1	UP
Olfr678	2.38989	0.0659568	1	UP
Lin7a	-0.706154	0.0660107	1	DOWN
Ythdc1	0.409569	0.0662315	1	UP
Rpgrip1l	-0.660706	0.0662533	1	DOWN
H3f3a	0.19526	0.0663097	1	UP
Bank1	-1.05169	0.066328	1	DOWN
Prkag2	-0.348755	0.0665337	1	DOWN
Anxa9	-1.18547	0.0666293	1	DOWN
Trnt1	0.189585	0.0666551	1	UP
Kdelc2	-0.29969	0.0666898	1	DOWN
Rcan1	-0.603654	0.0668746	1	DOWN
Mosmo	0.200819	0.0668756	1	UP
Dennd4c	0.259844	0.0669606	1	UP
Pcgf1	-0.396144	0.0670387	1	DOWN
Upf3b	0.289577	0.0671024	1	UP
Hoxc9	2.12284	0.0671222	1	UP
Rab19	-2.29513	0.067202	1	DOWN
Lhx6	-0.777739	0.067216	1	DOWN
Ttc30a2	-1.94826	0.0672349	1	DOWN
Eml1	0.859611	0.0673521	1	UP
Ccnd1	-0.873145	0.0674188	1	DOWN
Rps6ka1	-0.50786	0.0674752	1	DOWN
Gngt2	-0.552142	0.0675004	1	DOWN
Acp2	-0.22704	0.0675064	1	DOWN
Mapk8ip3	-0.312168	0.0675663	1	DOWN
Klhl11	0.662736	0.0676206	1	UP
Nucks1	0.274331	0.0676695	1	UP
Ms4a4b	-2.05548	0.0677284	1	DOWN
Igflr1	2.97978	0.0677862	1	UP
Wdr81	-0.380402	0.067888	1	DOWN
Mapkapk3	-0.521247	0.067967	1	DOWN
Stard13	-0.46358	0.0680735	1	DOWN
Ckmt2	1.08773	0.0681609	1	UP
Casp2	0.331649	0.0682129	1	UP
Kansl1l	0.455227	0.0683372	1	UP
Rest	0.314674	0.0685014	1	UP
Lats1	0.211391	0.0685496	1	UP
Fhod1	-0.707105	0.0685622	1	DOWN
Rnf126	-0.341927	0.0686626	1	DOWN
Hmgn3	0.94008	0.0686755	1	UP
Ankrd1	1.14473	0.0687189	1	UP
Rnf6	0.178539	0.0687405	1	UP
Etf1	0.163117	0.0687792	1	UP
Pdgfa	-0.53833	0.0688012	1	DOWN
Tnnt1	0.898626	0.0688516	1	UP
Pdzd2	-0.811959	0.0690419	1	DOWN
Rorc	-0.423793	0.0691515	1	DOWN
Efna3	-1.99826	0.0694051	1	DOWN
Kdm5d	-0.573224	0.0694469	1	DOWN
LTO1	-0.31764	0.0696595	1	DOWN
Gm16253	2.04835	0.0697017	1	UP
Iffo2	-0.404193	0.0697407	1	DOWN
Cracr2a	1.36869	0.0697953	1	UP
Celf1	0.13468	0.0698335	1	UP
Mphosph10	0.270801	0.0699063	1	UP
Hras	-0.229896	0.0699862	1	DOWN
Zfp790	0.33254	0.0699937	1	UP
Zer1	-0.250946	0.0700093	1	DOWN
Prelid2	0.963658	0.070021	1	UP
Fancb	-1.11369	0.07012	1	DOWN
Wasl	0.241825	0.0701403	1	UP
Zfp91	0.165504	0.0703499	1	UP
Alg11	0.189064	0.0703831	1	UP
Usp38	0.275397	0.0704574	1	UP
Abtb2	-0.533365	0.0705425	1	DOWN
Olfr366	1.09776	0.0707786	1	UP
Dapk2	-0.659215	0.0707932	1	DOWN
Paqr7	-0.661013	0.0709947	1	DOWN
2210016L21Rik	-0.297223	0.071203	1	DOWN
Tab2	0.202783	0.0713038	1	UP
Usp17la	1.26096	0.0713719	1	UP
Phf21b	-1.45252	0.0713989	1	DOWN
Caap1	0.400997	0.0714881	1	UP
Mus81	-0.486557	0.0717194	1	DOWN
Fkbp10	-0.834484	0.0717988	1	DOWN
Gpr17	-1.23203	0.0718592	1	DOWN
Gcsam	-2.13946	0.0718974	1	DOWN
Gipc2	-2.86964	0.0719079	1	DOWN
Sec23a	0.152213	0.0719199	1	UP
Hsd17b2	-0.405123	0.0719351	1	DOWN
Rfc3	-0.575605	0.071996	1	DOWN
2310022B05Rik	-0.261655	0.0720112	1	DOWN
Rpl31	-0.221695	0.0721084	1	DOWN
Asb6	-2.15234	0.0721433	1	DOWN
Atp8b5	-1.99998	0.0722145	1	DOWN
Ints4	-0.230771	0.072296	1	DOWN
Lrrc15	-1.62269	0.0724562	1	DOWN
Tyk2	-0.335656	0.0724576	1	DOWN
Tcaim	-0.606093	0.0727557	1	DOWN
Tbx20	-0.573586	0.0728231	1	DOWN
Hagh	-0.221255	0.0728527	1	DOWN
Kmt5b	0.182964	0.0729285	1	UP
Dcaf15	-0.446471	0.0730572	1	DOWN
Tinf2	-0.342659	0.0730832	1	DOWN
Vmn1r1	1.22857	0.0732253	1	UP
C1qtnf2	-1.20513	0.0732399	1	DOWN
Olfr720	-2.20576	0.0734574	1	DOWN
Rangrf	-0.492758	0.0734765	1	DOWN
Mex3c	0.27769	0.0734857	1	UP
Rit1	-0.346319	0.0734862	1	DOWN
Gpr137c	1.18455	0.0734905	1	UP
Seh1l	0.175592	0.0734952	1	UP
Vezf1	0.216642	0.0735411	1	UP
Smarcd3	1.42544	0.0736013	1	UP
Fbxo38	0.167011	0.0737725	1	UP
Syde2	0.611612	0.0738459	1	UP
Ltbp3	-0.491729	0.0738551	1	DOWN
Mmp17	-1.10982	0.074045	1	DOWN
Galnt16	2.12282	0.0740926	1	UP
Angptl8	-0.9988	0.0741281	1	DOWN
Olfr1356	2.98779	0.0742692	1	UP
Alox12	-1.23504	0.0743026	1	DOWN
Amz1	-2.23377	0.0743925	1	DOWN
Ebf1	-1.06663	0.0745811	1	DOWN
Olfr1220	1.1564	0.0746861	1	UP
Cacna1d	-2.18741	0.074937	1	DOWN
Ccdc191	1.73241	0.0749742	1	UP
Hpcal1	-0.435398	0.0750516	1	DOWN
Shf	-0.580557	0.0750585	1	DOWN
Bmf	-0.679397	0.0751213	1	DOWN
Rgs3	-1.08383	0.0751526	1	DOWN
Rnf146	0.224968	0.0754114	1	UP
Impa2	-1.0128	0.0755209	1	DOWN
Leng8	-0.301172	0.0755746	1	DOWN
Atad1	0.200631	0.0756819	1	UP
Fam199x	0.392186	0.0757154	1	UP
Vmn1r184	2.20503	0.0757297	1	UP
Nat14	0.796901	0.0757586	1	UP
Ntrk2	0.904558	0.0757702	1	UP
Fbxl20	-0.244294	0.0757752	1	DOWN
Ralb	0.272409	0.0757909	1	UP
Foxo1	0.604225	0.0759316	1	UP
Adam33	2.08615	0.0759382	1	UP
Sidt2	-0.200544	0.0760212	1	DOWN
Zfyve26	-0.308653	0.0761608	1	DOWN
Prickle1	-0.525362	0.076176	1	DOWN
Tmem160	-0.498194	0.0764064	1	DOWN
Hs1bp3	-0.392611	0.0764099	1	DOWN
Cux2	-1.01466	0.0765054	1	DOWN
Mrs2	-0.242515	0.0765263	1	DOWN
Trim5	-0.781849	0.0766602	1	DOWN
Rtl8c	-1.39247	0.0766957	1	DOWN
Tmie	-0.626595	0.0767417	1	DOWN
Ttyh3	-0.578255	0.0768093	1	DOWN
Ttf2	-0.38766	0.0768775	1	DOWN
Slc35d2	-0.518016	0.0769043	1	DOWN
Eps8l1	-0.946982	0.0769197	1	DOWN
Strada	-0.709348	0.0769316	1	DOWN
Shmt1	-0.464049	0.0770327	1	DOWN
Olfr1250	-1.61087	0.0770354	1	DOWN
Acap3	-1.00431	0.0775048	1	DOWN
Cep83	0.46554	0.0775202	1	UP
Mcam	-0.558366	0.0775967	1	DOWN
Fam120a	0.11056	0.0777021	1	UP
Uba3	0.181775	0.0778282	1	UP
Ogfrl1	0.281054	0.0778414	1	UP
Edn1	0.765584	0.07805	1	UP
Tmc8	-0.838957	0.078147	1	DOWN
Rec8	-1.81102	0.0781742	1	DOWN
Frmd8	-0.239472	0.0782232	1	DOWN
Mgst3	-0.566822	0.0783957	1	DOWN
Trove2	0.339274	0.0785859	1	UP
Tmem189	0.359734	0.0788517	1	UP
Ihh	-1.80086	0.0788595	1	DOWN
Itpr3	0.607541	0.0789327	1	UP
Olfml1	-0.592815	0.0789571	1	DOWN
Cyp2j13	1.40837	0.0794606	1	UP
Tsga10	-0.652361	0.0794781	1	DOWN
Tmem18	-0.249457	0.0795691	1	DOWN
Suco	0.377459	0.079615	1	UP
Acot3	-1.9599	0.0796402	1	DOWN
Dbf4	-0.508693	0.0796715	1	DOWN
Phf11d	-0.595903	0.0797942	1	DOWN
Pcbp4	-0.371795	0.0799068	1	DOWN
Tcf21	-0.616702	0.0799187	1	DOWN
Asap2	0.426611	0.0799931	1	UP
Adgra3	-0.25031	0.0800312	1	DOWN
Erap1	0.226507	0.0800501	1	UP
Cd164	0.209515	0.0802221	1	UP
Arl15	0.358026	0.0803119	1	UP
Atxn7	0.239014	0.0803801	1	UP
Sec62	0.127686	0.0805484	1	UP
Ppox	-0.355408	0.0805546	1	DOWN
Dvl1	-0.2596	0.0805812	1	DOWN
Nme7	-0.435424	0.0806852	1	DOWN
Pot1a	0.335147	0.0807631	1	UP
Picalm	0.389831	0.0808187	1	UP
Zfp646	0.260099	0.0808546	1	UP
Ssu72	0.139077	0.0808827	1	UP
Pla2g4a	-0.912469	0.0810299	1	DOWN
Fam92a	0.318405	0.0811061	1	UP
Rhpn2	-0.540065	0.0811245	1	DOWN
Clk1	0.575189	0.0811276	1	UP
Xlr4b	-3.02759	0.0811692	1	DOWN
Sema3e	-1.38483	0.0811817	1	DOWN
Ankrd13c	0.22604	0.0813235	1	UP
Pbrm1	0.167704	0.0813342	1	UP
Wdr76	-0.763085	0.0815082	1	DOWN
Tia1	-1.10911	0.0815664	1	DOWN
Eif4g3	0.257895	0.0815923	1	UP
Ythdf3	0.178216	0.0816764	1	UP
Vwa7	1.29013	0.0817184	1	UP
Tmem60	0.262651	0.0817343	1	UP
Dnaic1	-1.79649	0.0817352	1	DOWN
Fscn1	-0.95834	0.0817594	1	DOWN
Eri2	-2.90569	0.0817829	1	DOWN
Klhdc8b	-0.68306	0.0818841	1	DOWN
Hhipl1	-0.885538	0.0822934	1	DOWN
Zfp277	-0.239724	0.082297	1	DOWN
Nsd2	-0.330544	0.0823157	1	DOWN
C1qtnf12	-0.743729	0.0824284	1	DOWN
Sdk2	1.38953	0.0826135	1	UP
Mcm2	-0.675976	0.0826409	1	DOWN
Ube2l6	-0.287079	0.0826427	1	DOWN
Topors	0.195267	0.0826574	1	UP
Hus1	0.802695	0.082692	1	UP
Hdac5	-0.518072	0.082809	1	DOWN
Nrg3	-2.2548	0.0828265	1	DOWN
Exog	-1.6289	0.0829101	1	DOWN
Rapgefl1	-2.07459	0.0831884	1	DOWN
Gm14327	0.493991	0.0833172	1	UP
Gm2004	1.36322	0.0833326	1	UP
Trpv1	-2.03864	0.0833696	1	DOWN
Traf1	-1.60035	0.0833791	1	DOWN
Dctn5	-0.155227	0.0834755	1	DOWN
Rnaseh1	-0.368893	0.0835412	1	DOWN
Insig2	0.473623	0.0835619	1	UP
Zfand5	0.26928	0.0835948	1	UP
Gm20075	1.10036	0.083663	1	UP
Arhgap21	-0.213831	0.0837394	1	DOWN
Nags	0.306136	0.08376	1	UP
Cdc20	-1.80464	0.0837612	1	DOWN
Aplf	-0.714301	0.0839153	1	DOWN
Pik3cg	-1.36063	0.0839298	1	DOWN
Polr3f	0.208539	0.0839776	1	UP
Ube2d2a	0.134159	0.0841056	1	UP
Tmem87b	0.36227	0.084164	1	UP
Sdc3	-0.376915	0.0841843	1	DOWN
Grip1	1.50045	0.084265	1	UP
Mgl2	1.41426	0.0844224	1	UP
Edem3	0.255358	0.0846436	1	UP
Ckb	-0.587368	0.0846721	1	DOWN
H2-Ob	-1.52092	0.0849855	1	DOWN
Pnrc1	0.333424	0.0850415	1	UP
Lysmd3	0.33428	0.0852315	1	UP
Sec24a	0.262462	0.0852785	1	UP
Fbxl3	0.247755	0.0853257	1	UP
Sirt6	-0.520384	0.0853594	1	DOWN
Tgds	0.272903	0.0855995	1	UP
Spns3	-2.40397	0.0858067	1	DOWN
Gal3st2c	-1.35258	0.0858635	1	DOWN
Irf8	-0.440448	0.0859012	1	DOWN
Map3k13	0.713507	0.0859146	1	UP
Ctdspl2	0.477573	0.086011	1	UP
Mvb12b	-0.572107	0.08608	1	DOWN
Abcd1	-0.320957	0.0861177	1	DOWN
Snapc2	-0.328272	0.0862714	1	DOWN
Wdr93	1.05383	0.086375	1	UP
Rgs10	-0.664905	0.0863763	1	DOWN
Mri1	-0.326365	0.0864526	1	DOWN
Esyt3	-2.36329	0.0865187	1	DOWN
Piezo1	1.12699	0.0866879	1	UP
Rtkn	-0.787391	0.0867448	1	DOWN
Wapl	0.179763	0.086839	1	UP
Hsf4	-1.3376	0.0869104	1	DOWN
Scfd2	0.335055	0.0869153	1	UP
Olfr898	-1.39766	0.0869963	1	DOWN
Ints9	-0.243525	0.0870447	1	DOWN
Spn	-0.966961	0.087064	1	DOWN
Tmem33	0.204201	0.0870733	1	UP
Arl13b	0.451076	0.0871994	1	UP
Lsm1	-0.215731	0.0873743	1	DOWN
Dph1	-0.319216	0.0874656	1	DOWN
Bdnf	-0.748041	0.087602	1	DOWN
Bhlhe41	-0.776997	0.0876945	1	DOWN
Noc3l	0.295983	0.0877018	1	UP
Nipsnap2	-0.270911	0.0877139	1	DOWN
Arc	-2.08779	0.0877584	1	DOWN
Adamts12	-1.52893	0.0877864	1	DOWN
Phf12	0.192512	0.0877995	1	UP
Tbata	-2.20337	0.0878001	1	DOWN
Srsf11	0.220482	0.0878006	1	UP
Mnat1	0.443412	0.0879363	1	UP
Crabp2	3.13922	0.0879461	1	UP
Slc6a8	-0.519621	0.0880064	1	DOWN
Rpl18a	-0.283781	0.0881185	1	DOWN
Tnfrsf26	-0.835784	0.0881963	1	DOWN
Ndufaf6	-0.337532	0.0883225	1	DOWN
Sh2d1b1	2.35824	0.0883631	1	UP
Gm14403	0.532719	0.0884456	1	UP
Amd2	1.71176	0.0885161	1	UP
Zfp930	0.291491	0.0886137	1	UP
Ptgs1	-1.19281	0.0887274	1	DOWN
Casq1	-1.97143	0.0887872	1	DOWN
Fam91a1	0.169085	0.0888819	1	UP
Lrrc58	0.358412	0.0892173	1	UP
Tob1	0.342868	0.0892244	1	UP
Bmp4	-0.539953	0.0892421	1	DOWN
Il1r1	0.647486	0.089263	1	UP
Btbd6	-0.328043	0.0893896	1	DOWN
Olfr173	-1.17079	0.0894372	1	DOWN
Sbk1	-0.487412	0.0894493	1	DOWN
Plat	-0.963016	0.0895842	1	DOWN
Zbtb7a	0.237671	0.0895984	1	UP
Ell2	0.421691	0.0896167	1	UP
Wls	-0.478969	0.0897678	1	DOWN
Olfr624	-0.288887	0.0897811	1	DOWN
Nck1	0.208112	0.0898707	1	UP
Gadd45a	-0.732642	0.0900913	1	DOWN
Vac14	-0.239259	0.0901708	1	DOWN
N4bp2	0.294287	0.090241	1	UP
Eny2	0.253608	0.090305	1	UP
Sirt5	-0.25234	0.0903569	1	DOWN
Fkbp1b	-1.42029	0.0903575	1	DOWN
Art2b	-1.90258	0.0903797	1	DOWN
Pphln1	2.55734	0.0904139	1	UP
Zfp710	-0.370457	0.0904412	1	DOWN
Tmem177	-0.332061	0.0905862	1	DOWN
Wdtc1	-0.204569	0.0906345	1	DOWN
Bnip3l	0.209414	0.0906733	1	UP
Lamp2	0.175456	0.0907715	1	UP
Prss35	-1.67554	0.0908239	1	DOWN
Igsf10	-0.829339	0.090901	1	DOWN
Il10	-2.58192	0.0909601	1	DOWN
Pcdhb14	-1.23076	0.0910417	1	DOWN
Zc3h8	-0.361845	0.0910553	1	DOWN
Spen	0.318814	0.0910889	1	UP
Zswim8	0.284128	0.0913566	1	UP
Zfp362	-0.426316	0.091401	1	DOWN
Gbp5	-1.08078	0.0914103	1	DOWN
Psmd13	0.194416	0.091412	1	UP
Btbd2	-0.349344	0.0914722	1	DOWN
Ap4b1	0.243458	0.0917309	1	UP
Pcdhga10	-1.95963	0.0917926	1	DOWN
Smcr8	0.251538	0.0919515	1	UP
Ube2t	-1.73388	0.0919641	1	DOWN
Susd6	0.316262	0.0919693	1	UP
Stum	-1.96418	0.0920884	1	DOWN
Eprs	0.174322	0.0920956	1	UP
Snip1	0.197168	0.0922778	1	UP
Eif5b	0.197705	0.092436	1	UP
Tex9	1.53804	0.0924445	1	UP
Vmn1r50	-2.03147	0.0924609	1	DOWN
Kcng2	-1.67152	0.0926092	1	DOWN
Tspan5	1.78726	0.0926763	1	UP
Pard3b	0.342042	0.0926908	1	UP
Glmn	0.429466	0.0927015	1	UP
Ddx3x	0.271536	0.0927601	1	UP
Tdrd7	-0.281275	0.0928613	1	DOWN
Gnl3l	0.248535	0.0929157	1	UP
Mars2	0.268077	0.0931791	1	UP
Ddx3y	0.375498	0.0933475	1	UP
Myh6	1.33928	0.0933739	1	UP
Eif2s1	0.147079	0.0933829	1	UP
Cldn12	0.190202	0.0933887	1	UP
Rsl24d1	-0.157764	0.0934339	1	DOWN
Nipa2	0.207579	0.0936623	1	UP
Nptxr	-0.890318	0.093769	1	DOWN
Nkx2-9	-0.790267	0.093866	1	DOWN
Ly6a	-0.362039	0.0940267	1	DOWN
Cyp3a13	0.329669	0.0942179	1	UP
Pfkfb2	0.466268	0.0942789	1	UP
App	-0.259544	0.0943563	1	DOWN
Sgf29	-0.329632	0.0943665	1	DOWN
Srpx	1.03934	0.0943926	1	UP
Gpat2	-1.08446	0.0946755	1	DOWN
Eif3j2	0.220069	0.0947037	1	UP
Cryzl1	0.211624	0.0947993	1	UP
Yes1	0.310772	0.0948738	1	UP
Gpr176	-2.11532	0.0948862	1	DOWN
Vamp1	-0.688271	0.0948948	1	DOWN
Chic2	0.314047	0.0949527	1	UP
Zbtb42	-0.511679	0.0950026	1	DOWN
Noc4l	-0.263521	0.0950536	1	DOWN
Ppp3r1	0.150223	0.0951643	1	UP
AI464131	-0.53624	0.0952021	1	DOWN
Adap1	-2.77672	0.0952511	1	DOWN
Kcnj11	2.53693	0.0952972	1	UP
Grb2	0.129872	0.0954212	1	UP
Gdi2	0.123165	0.0954556	1	UP
Dcaf7	-0.208743	0.0955363	1	DOWN
Rnf13	0.206954	0.0956269	1	UP
Cnga3	1.8595	0.0956873	1	UP
Dnaja3	0.174483	0.0958516	1	UP
Arhgap28	-1.2214	0.0960747	1	DOWN
Casp8ap2	0.247337	0.0960833	1	UP
Dstn	0.229803	0.0960983	1	UP
Btrc	-0.328008	0.0961574	1	DOWN
Cdh15	0.851356	0.0961907	1	UP
A930004D18Rik	-1.0081	0.0962108	1	DOWN
Ift74	0.456092	0.0962325	1	UP
Zfp597	0.28534	0.0963525	1	UP
Cd68	-0.698433	0.0964864	1	DOWN
Parpbp	1.63569	0.0966184	1	UP
Eif3j1	0.124028	0.0966741	1	UP
Wdr53	-0.252628	0.0968198	1	DOWN
Gm14325	0.45921	0.096931	1	UP
Med1	0.195829	0.0969775	1	UP
Cyb5r3	-0.246621	0.0970415	1	DOWN
Ciapin1	-0.304266	0.0971024	1	DOWN
Hoxb5	-1.37859	0.0971769	1	DOWN
Brcc3	0.201839	0.0971827	1	UP
Trem3	-2.78137	0.0972183	1	DOWN
Ifi206	-1.35481	0.0972328	1	DOWN
Adamts6	-1.83229	0.0973788	1	DOWN
Ctse	-2.25068	0.0974202	1	DOWN
Eda2r	-1.83483	0.0977205	1	DOWN
Pradc1	-0.437679	0.0978862	1	DOWN
Rad50	-0.321585	0.0979995	1	DOWN
Abca1	0.376601	0.0980225	1	UP
Lars2	-0.546321	0.0980455	1	DOWN
Fat4	-0.881771	0.0980647	1	DOWN
Prune1	-0.260125	0.0981549	1	DOWN
Sufu	-0.298627	0.0981905	1	DOWN
Usp27x	-0.673017	0.0981908	1	DOWN
Daam2	2.80842	0.0982144	1	UP
Cav3	2.03348	0.0982559	1	UP
Hcst	-1.75244	0.0982587	1	DOWN
Spry2	-0.793387	0.0983243	1	DOWN
Ackr4	-1.0763	0.0983817	1	DOWN
Cul9	-0.587663	0.0984803	1	DOWN
Mical3	-0.604393	0.0984975	1	DOWN
Usp1	0.230528	0.0986423	1	UP
Pigu	-0.182414	0.0987199	1	DOWN
Ccl27a	0.855454	0.0987597	1	UP
Matk	-2.34213	0.0987633	1	DOWN
Lgi2	-1.32564	0.0987888	1	DOWN
Trip10	-0.331722	0.0988092	1	DOWN
Arap3	-0.480912	0.0988441	1	DOWN
Tmx3	0.218508	0.0989415	1	UP
Slc36a1	-0.418525	0.0989923	1	DOWN
Smim6	-1.12358	0.0992028	1	DOWN
Olfr635	0.525142	0.0992201	1	UP
Trmu	0.315074	0.0992423	1	UP
Mecp2	0.222486	0.0993011	1	UP
Cd300c2	-1.33966	0.0993819	1	DOWN
Maged2	-0.513051	0.0994014	1	DOWN
5430427O19Rik	-1.29774	0.099483	1	DOWN
Cacng4	-2.14197	0.0995625	1	DOWN
Kif26a	-1.05199	0.0995657	1	DOWN
Tmem263	0.339794	0.0995855	1	UP
Nr1i3	-0.476848	0.0996444	1	DOWN
Cd8b1	-2.20648	0.0997901	1	DOWN
Zpr1	0.26362	0.0998092	1	UP
Ywhaq	0.846615	0.0998873	1	UP
Gpbp1	0.221676	0.100158	1	UP
Thrb	0.31721	0.100435	1	UP
Tnfrsf11a	0.681972	0.100596	1	UP
Tpbgl	-0.488311	0.100597	1	DOWN
Ss18	0.598422	0.100618	1	UP
Lmo1	2.02656	0.100733	1	UP
Fam131a	1.83403	0.100771	1	UP
Zfp619	-0.538784	0.10081	1	DOWN
Coprs	-0.438754	0.101023	1	DOWN
Gmfb	0.178253	0.101153	1	UP
Lsamp	-1.93775	0.101177	1	DOWN
Arhgap24	-0.557885	0.101482	1	DOWN
Camta1	-0.726313	0.101603	1	DOWN
Thy1	-0.901177	0.101643	1	DOWN
Limd1	0.178091	0.101697	1	UP
Yy2	-0.826158	0.101833	1	DOWN
Ino80	0.250485	0.101844	1	UP
Ttll13	-1.99212	0.101884	1	DOWN
Tnfaip8	-0.507626	0.101992	1	DOWN
Traf3ip3	-2.05013	0.102003	1	DOWN
Chrnb2	2.26791	0.102197	1	UP
Amz2	-0.18288	0.102343	1	DOWN
Zfp37	0.894548	0.102346	1	UP
Atl2	0.340223	0.102381	1	UP
Tprn	-0.470976	0.10241	1	DOWN
Flna	-1.2119	0.102454	1	DOWN
Cyp4f14	-0.531477	0.102457	1	DOWN
Olfr613	-1.25398	0.102578	1	DOWN
Ammecr1	0.338552	0.102837	1	UP
Ern1	-0.50821	0.102861	1	DOWN
Ddx42	0.12291	0.102992	1	UP
Fmnl3	-0.503606	0.103066	1	DOWN
Dlg2	-2.03889	0.103082	1	DOWN
AW554918	-0.468922	0.103186	1	DOWN
Ppp1r15b	0.360215	0.103227	1	UP
Xrcc4	0.259419	0.103343	1	UP
Rhbdf2	0.402346	0.103344	1	UP
Mzt2	-0.272973	0.10339	1	DOWN
Sh3bp5	-0.312023	0.103484	1	DOWN
Cep41	-0.695993	0.103615	1	DOWN
Rragc	0.244557	0.103619	1	UP
Mrps5	0.224405	0.103652	1	UP
Top3a	-0.254808	0.103664	1	DOWN
Eva1c	-1.15658	0.103712	1	DOWN
Rsbn1l	0.20627	0.103771	1	UP
Them6	-0.536838	0.103828	1	DOWN
Adamtsl5	1.47192	0.103946	1	UP
Sox11	-1.92747	0.10397	1	DOWN
P2rx7	-0.906305	0.103973	1	DOWN
Zfp53	0.323027	0.104054	1	UP
Rsl1	-0.377399	0.104082	1	DOWN
Lcor	0.550571	0.104169	1	UP
Knop1	-0.170427	0.10422	1	DOWN
Zfp748	0.322493	0.104236	1	UP
Neurl3	-0.60822	0.104421	1	DOWN
Dnase1l1	-0.383716	0.104462	1	DOWN
Crebrf	0.31009	0.104515	1	UP
Sirpb1a	2.70995	0.104521	1	UP
Slc25a19	0.373581	0.104618	1	UP
Agfg1	0.168524	0.104667	1	UP
Ccdc32	-0.242945	0.104725	1	DOWN
Atp5s	0.308342	0.104777	1	UP
Gabre	-1.469	0.10502	1	DOWN
Zfp1	0.322777	0.105037	1	UP
Ptprg	0.247304	0.105299	1	UP
Bmp6	0.550972	0.105342	1	UP
Kras	0.243137	0.105393	1	UP
Gtf2h2	0.953752	0.105442	1	UP
Cngb3	2.06384	0.105453	1	UP
Plp2	-0.685053	0.105577	1	DOWN
Clip1	0.274009	0.105664	1	UP
Caprin2	-1.52079	0.105826	1	DOWN
Fndc8	2.54527	0.10595	1	UP
Mmp12	2.89898	0.106014	1	UP
Dnajc27	-0.448882	0.106148	1	DOWN
Synpo	0.542461	0.106189	1	UP
Tasp1	0.290605	0.106499	1	UP
Shoc2	0.185701	0.106549	1	UP
Wiz	1.40617	0.106644	1	UP
Rarb	-1.06624	0.106692	1	DOWN
Crem	0.34701	0.10671	1	UP
Trpv4	1.85641	0.106812	1	UP
Hspa12b	-0.963353	0.106876	1	DOWN
Slc35e1	0.183947	0.106989	1	UP
Gfra2	-0.973451	0.107159	1	DOWN
Mthfd2	0.763633	0.107183	1	UP
Tmem131	0.240638	0.107355	1	UP
Olfr95	-1.83263	0.107393	1	DOWN
Olfr506	-1.14972	0.107494	1	DOWN
Nudt2	-0.258338	0.107524	1	DOWN
Ggnbp2	0.202608	0.107642	1	UP
Olfr1116	-0.810869	0.107818	1	DOWN
Srpx2	-0.775923	0.107829	1	DOWN
Krcc1	0.214621	0.107873	1	UP
BC049715	1.30569	0.107878	1	UP
Vkorc1	-0.264123	0.107887	1	DOWN
Lancl2	0.3323	0.107909	1	UP
Adora1	0.528558	0.107915	1	UP
Dnal1	-0.576987	0.108058	1	DOWN
Pcsk7	-0.285116	0.108228	1	DOWN
Spata33	-1.69417	0.108325	1	DOWN
Wdr26	0.165394	0.108384	1	UP
A930033H14Rik	-0.674433	0.108403	1	DOWN
Slc13a4	-1.86733	0.108687	1	DOWN
Actr10	0.163108	0.10878	1	UP
Repin1	-0.271676	0.108893	1	DOWN
Arhgef11	0.475038	0.108941	1	UP
Ypel2	0.366816	0.10928	1	UP
Wdr6	-0.405477	0.109286	1	DOWN
Cables2	-0.271908	0.109324	1	DOWN
Ano8	-0.595798	0.109329	1	DOWN
Tmem255b	2.14381	0.109358	1	UP
Mbtps2	0.219638	0.109404	1	UP
Hnrnph2	0.142551	0.109555	1	UP
3830403N18Rik	-1.95315	0.109559	1	DOWN
Gm45808	-2.58576	0.109605	1	DOWN
Gad2	1.65341	0.109744	1	UP
Pak2	0.16637	0.109833	1	UP
Cnn2	-0.516251	0.109835	1	DOWN
Prkg1	-1.3421	0.109941	1	DOWN
Prkar2a	0.149255	0.109974	1	UP
Ptgfrn	-0.437811	0.109995	1	DOWN
Myl7	-2.03065	0.110005	1	DOWN
Jpt1	-0.328183	0.110114	1	DOWN
Lrig1	-0.395049	0.1103	1	DOWN
Mfsd13a	-1.05344	0.110456	1	DOWN
Prkd2	-0.329617	0.110598	1	DOWN
Rims4	-1.65243	0.110608	1	DOWN
Trim23	0.203387	0.110634	1	UP
Zfyve1	-0.235047	0.110666	1	DOWN
Mfsd12	-0.367955	0.1107	1	DOWN
Hist2h3c2	-0.666519	0.11073	1	DOWN
Spata7	0.456015	0.110752	1	UP
Sestd1	-0.504248	0.110822	1	DOWN
Mtmr2	0.768906	0.110852	1	UP
Mysm1	0.615236	0.110888	1	UP
Arcn1	0.184879	0.110913	1	UP
Dock10	-0.555805	0.11125	1	DOWN
Rin3	-0.512143	0.111353	1	DOWN
Itga4	-0.537272	0.111394	1	DOWN
Prmt1	-0.272231	0.111429	1	DOWN
Rnpc3	0.298505	0.111445	1	UP
Cenpp	0.880389	0.111586	1	UP
Fam181b	1.93426	0.111802	1	UP
Mtg2	0.4807	0.112207	1	UP
Ghrl	2.07765	0.112293	1	UP
Rasa3	-0.574012	0.112309	1	DOWN
Vrk1	-0.259747	0.112316	1	DOWN
Cask	0.268815	0.112329	1	UP
Ubr3	0.213171	0.112383	1	UP
Ift122	-0.807553	0.112431	1	DOWN
Fmr1	0.292634	0.112495	1	UP
Prkca	0.408184	0.112622	1	UP
Btnl9	-0.677583	0.112631	1	DOWN
Golgb1	0.218058	0.112768	1	UP
Prpf38a	0.181138	0.112787	1	UP
Trp53	-0.287529	0.112794	1	DOWN
Snapc3	-0.721588	0.112822	1	DOWN
Gal3st3	2.09489	0.112974	1	UP
Dhrs11	-0.22235	0.113288	1	DOWN
Map3k12	1.89654	0.113292	1	UP
Slc6a6	-0.481053	0.11341	1	DOWN
Cyth1	0.279533	0.113452	1	UP
Ythdc2	0.571362	0.113456	1	UP
Tnks	0.174908	0.113533	1	UP
Cfap300	0.834291	0.113626	1	UP
Dimt1	-0.406925	0.113629	1	DOWN
Coro6	1.87527	0.113633	1	UP
Klf9	0.424819	0.113662	1	UP
Saa3	0.728146	0.113664	1	UP
Ccnjl	-1.92344	0.11374	1	DOWN
Cd3e	-1.96336	0.113742	1	DOWN
Ubxn4	0.197176	0.113743	1	UP
Dusp8	0.599373	0.113764	1	UP
Ppp1r13l	0.433774	0.113784	1	UP
S100a6	-0.660988	0.113795	1	DOWN
Cltc	0.137901	0.113807	1	UP
Kpna4	0.217647	0.11381	1	UP
Cln6	-0.347402	0.113903	1	DOWN
Fam214b	0.268284	0.114066	1	UP
Maz	-0.186377	0.114153	1	DOWN
Med31	0.273238	0.114204	1	UP
Nek7	0.220309	0.11425	1	UP
Kctd2	-0.325601	0.114359	1	DOWN
Cyr61	-0.83934	0.114448	1	DOWN
Cd37	-0.737974	0.114462	1	DOWN
Rb1cc1	0.258742	0.114643	1	UP
Slc12a6	-0.513368	0.114654	1	DOWN
Tgfb1	-0.484291	0.114815	1	DOWN
Braf	0.201545	0.114846	1	UP
Tank	0.291595	0.114869	1	UP
Nrros	-0.48095	0.115141	1	DOWN
Tg	1.24684	0.115393	1	UP
Chst7	-0.955069	0.115431	1	DOWN
Fbp2	1.31565	0.115629	1	UP
Hsd3b7	-0.358361	0.115661	1	DOWN
Ramp2	0.655771	0.115755	1	UP
Abca7	-0.385683	0.115774	1	DOWN
Ly6h	2.03747	0.115797	1	UP
Rasgef1b	0.77596	0.115827	1	UP
Dpysl2	-0.443787	0.115839	1	DOWN
Nmrk1	-0.472408	0.115892	1	DOWN
Sbsn	-1.08262	0.11591	1	DOWN
Dars2	0.527384	0.115991	1	UP
Gm14410	0.624083	0.116009	1	UP
Acadsb	0.367821	0.116049	1	UP
Ctnnal1	0.399695	0.116081	1	UP
Ppp2r2d	0.218556	0.116138	1	UP
Pex10	-0.344462	0.116163	1	DOWN
C1qb	-0.496955	0.116168	1	DOWN
Creb5	1.60373	0.116547	1	UP
Qrfp	-2.00698	0.116564	1	DOWN
Usp35	-0.962703	0.116755	1	DOWN
Ankib1	0.198797	0.116831	1	UP
Ccnc	0.248959	0.116858	1	UP
B9d1	-1.81242	0.116868	1	DOWN
Scn1b	-0.594633	0.117074	1	DOWN
Rheb	0.190106	0.117133	1	UP
Ccdc189	1.06877	0.117185	1	UP
Sirt2	0.113997	0.117278	1	UP
Npl	-0.996743	0.11739	1	DOWN
Mest	-1.21375	0.117393	1	DOWN
Sdr39u1	-0.275918	0.117433	1	DOWN
Gnaq	0.192801	0.117449	1	UP
Cdc27	0.169191	0.117544	1	UP
Atp8b2	-1.41587	0.117648	1	DOWN
Adnp	-1.86239	0.117655	1	DOWN
Lrrc75a	-0.691704	0.117745	1	DOWN
Mepce	0.202799	0.117848	1	UP
Il1f9	-0.926885	0.117897	1	DOWN
Gm3854	1.79618	0.117933	1	UP
Chd2	0.446158	0.118039	1	UP
Hspa4l	-0.302079	0.118055	1	DOWN
Frrs1l	-1.90417	0.118128	1	DOWN
Tmco3	0.308264	0.118186	1	UP
Tmem88	-0.677654	0.118252	1	DOWN
Pik3c2b	-0.437749	0.118366	1	DOWN
Prr3	0.383523	0.118388	1	UP
Atp6ap2	0.153645	0.118436	1	UP
Gpr132	1.5167	0.118468	1	UP
Pappa2	1.35748	0.118487	1	UP
Palm	-0.611271	0.118521	1	DOWN
Adgre5	-0.411948	0.118805	1	DOWN
Fabp5	-0.630587	0.118821	1	DOWN
Mipol1	0.524563	0.118969	1	UP
Hist1h4c	-1.79326	0.119028	1	DOWN
Casp1	-0.588858	0.119029	1	DOWN
Commd2	0.342158	0.11907	1	UP
Cyp3a59	0.439113	0.119102	1	UP
Dzank1	0.94457	0.119226	1	UP
Gm5150	-1.41204	0.119382	1	DOWN
Msh3	-0.502206	0.119514	1	DOWN
Skil	0.582191	0.119554	1	UP
Manba	-0.306338	0.119565	1	DOWN
Mrgbp	-0.597927	0.119677	1	DOWN
Pcdhgb4	2.27915	0.119895	1	UP
Pilra	-1.00901	0.120071	1	DOWN
Thumpd3	0.19242	0.120226	1	UP
Milr1	-0.796271	0.120401	1	DOWN
Iqgap3	1.74544	0.120402	1	UP
Sowaha	-1.78156	0.120488	1	DOWN
Sept7	0.160638	0.120655	1	UP
Manbal	-0.2428	0.120735	1	DOWN
Xaf1	-0.44397	0.120738	1	DOWN
H2-Ab1	-0.566219	0.120757	1	DOWN
Actr5	-0.62452	0.120816	1	DOWN
Galnt1	0.155794	0.120832	1	UP
Ift57	-0.659919	0.120979	1	DOWN
Pole	0.995893	0.12103	1	UP
Hnrnpl	-0.226688	0.121193	1	DOWN
Lamb3	0.522813	0.121233	1	UP
Ipo13	-0.258337	0.121267	1	DOWN
Aph1c	-0.594062	0.121329	1	DOWN
Taf1d	0.883223	0.121503	1	UP
Pptc7	0.378384	0.121638	1	UP
Natd1	-0.32182	0.121644	1	DOWN
Sncaip	1.07884	0.121663	1	UP
Mtbp	-0.504358	0.121719	1	DOWN
Shb	0.605804	0.121804	1	UP
Tmed8	-0.291307	0.121913	1	DOWN
Ccdc69	-1.09159	0.121949	1	DOWN
Zfp26	0.320443	0.121955	1	UP
Fabp7	-0.71394	0.122377	1	DOWN
Mtmr4	0.248447	0.122589	1	UP
Imp4	0.16594	0.12263	1	UP
Lmnb2	-0.400058	0.122689	1	DOWN
Ceacam20	2.07546	0.122698	1	UP
Fam172a	0.232071	0.122724	1	UP
Bmt2	0.269143	0.122771	1	UP
Dda1	-0.408188	0.122865	1	DOWN
Dqx1	-0.512421	0.122961	1	DOWN
Ifi44	-0.52616	0.123028	1	DOWN
Gdpd5	-0.731577	0.123032	1	DOWN
Gnl2	0.195655	0.123074	1	UP
Map10	-0.684704	0.123097	1	DOWN
Tmsb10	-0.494196	0.123113	1	DOWN
F2rl2	-1.62613	0.123212	1	DOWN
Tubb4a	1.48666	0.123239	1	UP
Wdr78	-1.79419	0.123396	1	DOWN
Kifap3	-0.291579	0.123513	1	DOWN
Ripor2	-0.8694	0.123556	1	DOWN
Ptpru	-0.862956	0.1237	1	DOWN
Vmn1r197	0.988705	0.123701	1	UP
Aldh6a1	0.304477	0.123771	1	UP
Cln5	0.168333	0.123799	1	UP
Slc22a23	-0.360478	0.123865	1	DOWN
1700017B05Rik	0.457616	0.12395	1	UP
Dop1b	0.583232	0.123977	1	UP
Cyth4	-0.604047	0.124291	1	DOWN
Slfn8	-0.622634	0.124354	1	DOWN
Esyt2	0.528973	0.124467	1	UP
Dync2h1	-0.442152	0.124536	1	DOWN
Ice1	0.355694	0.124621	1	UP
Nek5	-2.32509	0.124622	1	DOWN
Napsa	-1.68872	0.124772	1	DOWN
Pfn4	-0.870195	0.124787	1	DOWN
Syt12	0.491139	0.12502	1	UP
Pth1r	-0.493233	0.12504	1	DOWN
Cav2	-0.481897	0.125061	1	DOWN
Tuba1b	-0.43452	0.125153	1	DOWN
Pelo	-0.289615	0.125437	1	DOWN
Hspg2	-0.474459	0.125534	1	DOWN
Spats2l	-0.616734	0.125548	1	DOWN
Rrp8	-0.231867	0.12568	1	DOWN
Nars	0.159812	0.125749	1	UP
Nr2f2	-0.425232	0.125882	1	DOWN
Gm4791	1.93905	0.125902	1	UP
Pds5b	0.270636	0.125908	1	UP
Snrpa1	0.339588	0.126054	1	UP
Btnl10	-2.39197	0.126056	1	DOWN
Fam45a	0.230825	0.126093	1	UP
Nkrf	0.270107	0.126233	1	UP
Ckap5	0.20612	0.126242	1	UP
Clcn4	0.120676	0.126301	1	UP
Ppp4r2	0.205867	0.126334	1	UP
Maoa	0.357034	0.126411	1	UP
Mapre1	0.153571	0.126462	1	UP
A630076J17Rik	-1.30934	0.126516	1	DOWN
Slc15a4	0.432448	0.126568	1	UP
Kmt5c	-0.4037	0.126809	1	DOWN
Phgdh	1.43143	0.127026	1	UP
Gm14393	-2.00685	0.127199	1	DOWN
Esr2	-2.18729	0.127222	1	DOWN
Hdac10	-1.33628	0.127316	1	DOWN
Baz1a	0.338236	0.127321	1	UP
Golga3	0.19876	0.127334	1	UP
Naa60	-1.21759	0.127362	1	DOWN
Ofd1	0.330743	0.12739	1	UP
Vcam1	0.51478	0.127441	1	UP
Vmn1r20	-1.19901	0.127497	1	DOWN
Dbndd2	-0.37683	0.12752	1	DOWN
Fam206a	-0.675672	0.12753	1	DOWN
Naip5	-0.59792	0.127619	1	DOWN
Clstn2	1.47584	0.127728	1	UP
Ciao2a	0.139673	0.127796	1	UP
Orai2	-0.698915	0.127857	1	DOWN
Gpr68	-1.39878	0.127968	1	DOWN
Arid4b	0.236944	0.128107	1	UP
Epb41l3	1.92899	0.128152	1	UP
Akt3	-0.441609	0.128167	1	DOWN
C9orf72	0.378544	0.128249	1	UP
Gm19684	-2.03097	0.128261	1	DOWN
Elmod3	-0.320747	0.128355	1	DOWN
Arhgef18	0.218961	0.128375	1	UP
Pik3r4	-0.225326	0.128415	1	DOWN
Xlr3a	-1.62134	0.128457	1	DOWN
Mmp3	1.05634	0.12855	1	UP
Cd52	-0.978114	0.128834	1	DOWN
Hccs	0.220279	0.129142	1	UP
Taok3	-0.375268	0.12924	1	DOWN
Olfr645	1.53255	0.129241	1	UP
Arrb2	-0.375475	0.129355	1	DOWN
Gpsm1	0.606625	0.129401	1	UP
Jarid2	-0.219017	0.129536	1	DOWN
Zfp639	-0.206642	0.129557	1	DOWN
Mrpl3	0.328643	0.129826	1	UP
Slain1	-1.89527	0.129876	1	DOWN
Ddx28	0.377838	0.129894	1	UP
Ier5l	0.908892	0.13015	1	UP
Ackr1	-0.965142	0.130151	1	DOWN
Col8a1	-1.00294	0.130227	1	DOWN
Asic5	0.462102	0.130276	1	UP
Ndfip1	0.175883	0.130277	1	UP
Pam16	-0.65731	0.130326	1	DOWN
Dkc1	-0.312448	0.13051	1	DOWN
Tmem108	1.14727	0.130545	1	UP
Trim21	-0.378362	0.130594	1	DOWN
Psg16	-0.246515	0.130632	1	DOWN
Me3	-1.11379	0.130685	1	DOWN
Fgfr3	-0.494211	0.130755	1	DOWN
Trmt10c	0.213544	0.130875	1	UP
Lypla1	0.227568	0.131143	1	UP
Yars2	-0.201204	0.131232	1	DOWN
Vps13a	0.315018	0.131238	1	UP
Tbc1d10b	-0.189441	0.131339	1	DOWN
Klf4	-0.69174	0.131394	1	DOWN
Cdkn1b	0.25474	0.131575	1	UP
Cntrob	-1.56678	0.131588	1	DOWN
Ppargc1a	0.593751	0.131591	1	UP
Atp6v1g1	0.272355	0.131594	1	UP
Adra1b	-0.353473	0.131684	1	DOWN
Pik3r5	-0.717556	0.131719	1	DOWN
Gas7	-0.618203	0.131873	1	DOWN
Reg2	1.34457	0.131986	1	UP
Olfr1221	1.18014	0.132034	1	UP
Mospd3	-0.222815	0.132098	1	DOWN
Lrrc39	0.7582	0.132212	1	UP
Sema4d	-1.06495	0.132251	1	DOWN
Dcun1d5	0.147527	0.132423	1	UP
Pcnx4	-0.303095	0.132426	1	DOWN
Dnttip1	0.186462	0.132443	1	UP
Dok1	-0.765612	0.13253	1	DOWN
Cct2	0.119883	0.132568	1	UP
Ppil3	-0.20579	0.132756	1	DOWN
Tanc2	0.346947	0.13278	1	UP
Ubr1	0.147148	0.132834	1	UP
Fam110a	-0.849641	0.132884	1	DOWN
Mfap1a	0.204188	0.133047	1	UP
Hsf1	-0.272029	0.133136	1	DOWN
Coq3	0.218911	0.133212	1	UP
Zfp715	-0.547266	0.133242	1	DOWN
Itpr1	0.199742	0.133406	1	UP
Snx13	0.189625	0.133422	1	UP
Myh7	1.81948	0.133423	1	UP
Rlf	0.25237	0.133619	1	UP
Tnrc18	-0.361064	0.133758	1	DOWN
Gtf2h1	0.174302	0.133795	1	UP
Gas6	-0.393432	0.133894	1	DOWN
BC034090	-1.85514	0.133928	1	DOWN
Eif2s3y	0.248755	0.134	1	UP
Slc14a1	-1.52598	0.134058	1	DOWN
Ebpl	-0.206308	0.134085	1	DOWN
Vps50	0.34043	0.134109	1	UP
Polr3a	-0.317472	0.134278	1	DOWN
Ctsw	-1.64511	0.134356	1	DOWN
Hist1h2bg	-1.82234	0.134372	1	DOWN
Acat3	-0.318389	0.134379	1	DOWN
Nrm	-0.863674	0.134489	1	DOWN
Tab3	0.235465	0.134506	1	UP
Fam208b	0.31991	0.13489	1	UP
Asb13	-0.216034	0.134977	1	DOWN
Ccdc39	0.923817	0.134986	1	UP
Klb	-0.645707	0.135148	1	DOWN
Fbxo30	0.24201	0.135225	1	UP
Ccdc68	0.528445	0.135298	1	UP
Dcp1a	0.325525	0.135339	1	UP
4930518I15Rik	1.56274	0.135348	1	UP
Ptcra	2.0367	0.135415	1	UP
Habp4	-0.137833	0.13545	1	DOWN
Cfap157	1.66729	0.135582	1	UP
Tmem104	-0.383374	0.135715	1	DOWN
Pira2	-1.71848	0.135718	1	DOWN
Lepr	0.546129	0.135757	1	UP
Mbd5	0.278379	0.135789	1	UP
Mknk2	0.326547	0.135868	1	UP
Sgsm3	-1.00041	0.135915	1	DOWN
Pld4	-0.485767	0.136013	1	DOWN
Rad1	-0.418761	0.136136	1	DOWN
Angpt1	-0.70097	0.136173	1	DOWN
Zfp628	0.30418	0.136228	1	UP
Ccdc9	0.174692	0.13635	1	UP
Vwa1	-0.826891	0.136363	1	DOWN
Rac3	1.21148	0.136429	1	UP
Tspan32	1.92378	0.136779	1	UP
Cd207	-0.693157	0.136871	1	DOWN
Ifi205	-0.942231	0.136875	1	DOWN
St6galnac4	-0.685306	0.136875	1	DOWN
Ttl	-0.288899	0.136881	1	DOWN
Itfg1	0.148	0.13692	1	UP
Spon2	-1.64407	0.136956	1	DOWN
Spice1	-1.04927	0.136991	1	DOWN
Epb41l4a	-1.1028	0.137309	1	DOWN
Fstl3	-1.70815	0.137396	1	DOWN
Rbm3	0.389879	0.137447	1	UP
Pfkl	0.302179	0.137646	1	UP
Dcaf4	0.439609	0.137647	1	UP
2010315B03Rik	0.230651	0.137898	1	UP
Elavl1	0.167849	0.137994	1	UP
Wfikkn1	-1.54387	0.138101	1	DOWN
Slc8a3	-1.16357	0.138119	1	DOWN
Sik2	0.55095	0.138198	1	UP
Cdkn2aipnl	0.188369	0.138261	1	UP
Gzmm	-1.49907	0.138321	1	DOWN
Zfp28	-0.917156	0.138445	1	DOWN
Gpkow	0.125502	0.13858	1	UP
Lgals4	-0.561907	0.138626	1	DOWN
Tbc1d30	-1.0549	0.138757	1	DOWN
Zbtb11	0.314349	0.138797	1	UP
Lrig3	-0.478138	0.138804	1	DOWN
Osgin1	-0.49392	0.138876	1	DOWN
Olfr575	-0.889069	0.138902	1	DOWN
Kctd13	0.379115	0.139015	1	UP
Letm2	-0.628371	0.139034	1	DOWN
Apbb1	0.713097	0.13904	1	UP
Magi2	-1.65991	0.139047	1	DOWN
1600012H06Rik	0.160505	0.139138	1	UP
Rnf144b	-0.615949	0.139159	1	DOWN
Tmem69	0.199087	0.139285	1	UP
Plp1	-0.614496	0.139336	1	DOWN
Ubald2	-0.291987	0.139344	1	DOWN
Slc27a6	-1.88342	0.139363	1	DOWN
Pcdhb8	2.09615	0.139384	1	UP
Tbx6	-1.61322	0.139456	1	DOWN
Foxo3	0.367274	0.139458	1	UP
Eif5	0.211155	0.139521	1	UP
Pdcd10	0.220711	0.139539	1	UP
Slc5a3	-0.527261	0.139604	1	DOWN
Rell1	1.45871	0.139638	1	UP
Il17rd	-0.570191	0.139726	1	DOWN
Lrmp	-1.0132	0.139861	1	DOWN
Gabrb1	-1.37985	0.139956	1	DOWN
Zfp839	0.255822	0.14004	1	UP
Pcgf2	-0.482968	0.140045	1	DOWN
Txnl4b	-0.304423	0.140046	1	DOWN
Zfp354a	-0.428763	0.140107	1	DOWN
Mrpl22	-0.17582	0.140109	1	DOWN
Rassf4	-0.487778	0.140207	1	DOWN
Cds2	-0.257345	0.140244	1	DOWN
Pappa	1.1706	0.140249	1	UP
Zfp609	-0.241647	0.140254	1	DOWN
Tra2b	0.238562	0.14027	1	UP
Mybpc3	1.14308	0.140303	1	UP
Nptn	0.146845	0.140379	1	UP
Steap3	-0.365218	0.140402	1	DOWN
Pik3cd	-0.462654	0.140563	1	DOWN
Galnt12	-2.04636	0.140726	1	DOWN
Cnnm4	-0.458606	0.140795	1	DOWN
Gm9964	-2.19407	0.140845	1	DOWN
Ring1	-0.252063	0.140872	1	DOWN
Plcb2	-1.08086	0.141073	1	DOWN
Sdf4	0.112828	0.141172	1	UP
Rbmx2	0.433086	0.14126	1	UP
Lrrc2	1.21793	0.141272	1	UP
Htra1	-1.19998	0.141277	1	DOWN
Eif3e	0.161412	0.1414	1	UP
Ocrl	-0.313038	0.141438	1	DOWN
Apeh	-0.182879	0.141447	1	DOWN
Cops7b	0.543544	0.141471	1	UP
Lrp11	0.458798	0.141562	1	UP
Casq2	1.09365	0.141596	1	UP
Strap	0.108196	0.14168	1	UP
Rpl15	-0.226033	0.141705	1	DOWN
Cers6	0.406451	0.14175	1	UP
Phf7	-0.624682	0.141803	1	DOWN
Rnf152	-0.477735	0.141821	1	DOWN
Pdgfrl	-1.11343	0.141913	1	DOWN
Mon1b	0.212399	0.141925	1	UP
Gm17067	1.61324	0.142	1	UP
Zfp324	-1.479	0.142004	1	DOWN
Cd180	-0.88518	0.142042	1	DOWN
Brk1	0.124087	0.142077	1	UP
Larp4b	0.180035	0.14218	1	UP
Smim20	-0.225569	0.142364	1	DOWN
Hspb2	1.11869	0.142416	1	UP
Stradb	-0.633704	0.142419	1	DOWN
Ovca2	-0.188416	0.142511	1	DOWN
Cers5	-0.323795	0.142524	1	DOWN
Son	0.176467	0.142584	1	UP
Crcp	0.210892	0.142721	1	UP
Hemk1	-0.474186	0.142733	1	DOWN
Wdyhv1	-0.298421	0.143077	1	DOWN
Mafg	0.18976	0.143345	1	UP
Olfr251	-1.95684	0.143345	1	DOWN
Pms2	-1.16868	0.143397	1	DOWN
Gm13304	5.09151	0.143519	1	UP
Olfr1033	0.459695	0.143524	1	UP
Clec4d	-1.73801	0.143637	1	DOWN
Nap1l3	-0.600512	0.143668	1	DOWN
Shcbp1	-1.94946	0.143683	1	DOWN
Kcnab3	4.4445	0.143734	1	UP
Psmd12	0.129714	0.143827	1	UP
Fnbp1	-0.219798	0.143927	1	DOWN
Siglece	-0.58212	0.143951	1	DOWN
Msl2	0.135088	0.143956	1	UP
Fam83d	1.30451	0.144055	1	UP
Manea	0.196022	0.144099	1	UP
Txndc16	-0.396595	0.144122	1	DOWN
Tgfbr3l	1.61573	0.14436	1	UP
Nr4a2	-1.63031	0.144382	1	DOWN
Adora3	-1.6665	0.144456	1	DOWN
9930111J21Rik2	0.502003	0.144762	1	UP
Slit1	1.50456	0.144869	1	UP
Ruvbl1	-0.188654	0.144926	1	DOWN
Commd6	0.185766	0.14494	1	UP
Gm21244	0.444736	0.145339	1	UP
Kcnk6	-0.475348	0.145556	1	DOWN
Vps36	0.129487	0.14559	1	UP
Nipal1	-1.004	0.145784	1	DOWN
Uba6	0.291483	0.145791	1	UP
Kcne4	-1.00598	0.145896	1	DOWN
Nrg1	-1.55436	0.146114	1	DOWN
Tmed5	0.386778	0.146127	1	UP
Ankrd13a	0.257136	0.146352	1	UP
Kcnn4	-1.39946	0.146356	1	DOWN
Parp8	1.76767	0.146417	1	UP
Ube2g1	0.191919	0.146501	1	UP
Cacna1a	-1.25953	0.146552	1	DOWN
Cript	0.136353	0.146655	1	UP
Npffr1	-0.867111	0.146786	1	DOWN
Lrp6	0.214294	0.146999	1	UP
Cpxm1	-0.905654	0.147059	1	DOWN
Ttll4	0.456585	0.14706	1	UP
Dcaf10	0.186602	0.147096	1	UP
Atic	-0.157155	0.147099	1	DOWN
Slco5a1	-1.34481	0.147125	1	DOWN
Atp11c	0.2467	0.147283	1	UP
Trp53i11	-0.631077	0.147346	1	DOWN
Fam69a	-0.381759	0.147347	1	DOWN
Prdm10	-0.349347	0.147489	1	DOWN
Hivep1	0.27718	0.147526	1	UP
Fgf14	-1.62984	0.147532	1	DOWN
Cd3d	-1.0312	0.147621	1	DOWN
4933424G06Rik	-1.97658	0.147674	1	DOWN
Mrpl19	-0.210538	0.147742	1	DOWN
Gpr65	-0.551025	0.147746	1	DOWN
Pja2	0.14754	0.147775	1	UP
Mettl2	-0.422269	0.147794	1	DOWN
Olfr2	1.54846	0.147963	1	UP
Denr	0.159464	0.148029	1	UP
Vmn1r46	-0.354228	0.148053	1	DOWN
Evl	-0.441738	0.148061	1	DOWN
Treml4	-0.717751	0.148078	1	DOWN
Vamp8	-0.168317	0.148122	1	DOWN
Rbm41	0.434436	0.148168	1	UP
Serpinb2	2.24103	0.148182	1	UP
Tti2	-0.457165	0.148195	1	DOWN
Gm9938	0.628143	0.148198	1	UP
Selenos	0.205668	0.148257	1	UP
Col6a5	-1.20335	0.148312	1	DOWN
Rnf113a2	0.206012	0.148591	1	UP
Pcnp	0.497908	0.148595	1	UP
Gin1	0.401613	0.148632	1	UP
Ncs1	1.2455	0.148632	1	UP
Slc9a1	-0.308723	0.148663	1	DOWN
Arap1	-0.396604	0.148797	1	DOWN
Tom1l1	0.177337	0.148811	1	UP
Tsc22d3	0.586518	0.148946	1	UP
Pkib	-0.791161	0.14897	1	DOWN
Bex1	1.17545	0.149134	1	UP
Pou2f2	-0.579742	0.149381	1	DOWN
Foxred1	0.25498	0.14951	1	UP
Nqo2	-0.257837	0.149536	1	DOWN
Ttc23	-0.417758	0.149564	1	DOWN
Zfp426	0.586711	0.149658	1	UP
Insl6	-1.4535	0.149705	1	DOWN
Rsrp1	1.01692	0.149796	1	UP
Cyp2r1	-0.449714	0.149882	1	DOWN
Map2k4	0.186765	0.149931	1	UP
Meig1	-1.76314	0.15	1	DOWN
Rlim	0.213126	0.150077	1	UP
Hmmr	0.873225	0.150163	1	UP
Zfp248	-0.714188	0.150188	1	DOWN
Dync1li1	0.144987	0.150229	1	UP
Cep126	-1.64343	0.150493	1	DOWN
Zfp951	-0.368935	0.150506	1	DOWN
Lrrcc1	-0.436574	0.150588	1	DOWN
Stx7	0.212962	0.15084	1	UP
Pou6f1	1.05911	0.150886	1	UP
Ndrg3	-0.237025	0.151156	1	DOWN
Abcg1	-0.498921	0.151249	1	DOWN
Pes1	-0.161714	0.151354	1	DOWN
Corin	1.45423	0.151378	1	UP
Tmem38b	0.199118	0.151505	1	UP
Parm1	0.901085	0.151722	1	UP
Mfsd9	-0.754471	0.15179	1	DOWN
Tut4	-0.259497	0.151934	1	DOWN
Zkscan4	-0.835961	0.151955	1	DOWN
Sh3bp2	-0.397088	0.152056	1	DOWN
Prkch	0.3768	0.152058	1	UP
Cfap97d2	1.69259	0.152202	1	UP
Fndc1	-1.31572	0.152203	1	DOWN
Dars	0.118721	0.15246	1	UP
Cers4	-0.479306	0.152488	1	DOWN
Efr3b	-0.534555	0.15264	1	DOWN
Olfr1160	1.76116	0.152694	1	UP
Fam149a	-0.325138	0.152776	1	DOWN
Synm	-0.561803	0.152831	1	DOWN
Slc44a2	-0.532359	0.152838	1	DOWN
[truncated: 19,839 more rows]

## Sheet: Muscle (24h)
Gene name	L2FC	P-VALUE	P-ADJ	DIRECTION
Rnf186	-27.7748	7.4913e-41	9.93347e-37	DOWN
Mmp7	25.6269	1.36046e-23	9.01986e-20	UP
Rab25	28.6945	4.25505e-23	1.88073e-19	UP
Gpx6	-22.374	5.8683e-20	1.94534e-16	DOWN
Scn5a	4.25609	1.45798e-18	3.86657e-15	UP
Chmp1b	0.98274	1.92908e-18	4.26326e-15	UP
Pttg1ip	1.13483	8.76537e-18	1.66041e-14	UP
Rasef	-16.8999	2.14956e-16	3.56289e-13	DOWN
Defb1	-16.0291	2.09739e-14		DOWN
Zfp207	0.821452	1.87921e-12	2.7687e-09	UP
Dnajb1	2.85892	5.29974e-12	7.02745e-09	UP
Las1l	0.906554	3.16646e-11	3.81703e-08	UP
Acsf2	1.42528	1.01969e-10	1.12676e-07	UP
Trmt61a	1.86643	1.18542e-10	1.20913e-07	UP
Hmox1	2.91197	2.06423e-10	1.95512e-07	UP
Itpkc	1.87545	2.30008e-10	2.03327e-07	UP
Sat1	1.75331	6.27145e-10	5.19747e-07	UP
Zwint	0.945867	9.4252e-10	7.35166e-07	UP
Scaf8	0.739205	1.0285e-09	7.57662e-07	UP
Pabpc1	0.684245	1.31514e-09	9.17829e-07	UP
Hnrnpf	0.609693	2.19566e-09	1.45572e-06	UP
Plpp7	-1.08979	2.32765e-09	1.46974e-06	DOWN
Srxn1	1.2722	2.89859e-09	1.74706e-06	UP
Serpina3n	2.11061	3.29148e-09	1.89761e-06	UP
Pi4k2a	0.742676	5.26916e-09	2.91121e-06	UP
Wdr43	0.849806	5.80768e-09	3.08039e-06	UP
Usp15	-0.893176	6.75392e-09	3.4445e-06	DOWN
Ppp1r15a	1.63264	9.13233e-09	4.48499e-06	UP
Oxnad1	-1.07509	1.01584e-08	4.81072e-06	DOWN
Rras2	1.59469	1.1384e-08	5.20525e-06	UP
Thumpd3	0.816637	1.24281e-08	5.49322e-06	UP
Ankrd1	3.06409	1.68803e-08	7.22043e-06	UP
Abi1	0.766869	2.49984e-08	1.03587e-05	UP
Mt1	2.10608	2.84933e-08	1.11676e-05	UP
Arc	4.40165	2.86348e-08	1.11676e-05	UP
Mt2	2.80837	3.12508e-08	1.18396e-05	UP
Eif4a1	0.923703	3.62442e-08	1.29765e-05	UP
Erbin	0.817694	3.69838e-08	1.29765e-05	UP
Gabarapl1	1.32269	3.71877e-08	1.29765e-05	UP
Hoga1	2.16731	3.90018e-08	1.32606e-05	UP
Ildr1	-15.3153	4.20672e-08	1.39453e-05	DOWN
Zfand2a	1.10505	4.32244e-08	1.39794e-05	UP
Cavin4	1.20268	6.42627e-08	2.02886e-05	UP
Slc6a12	3.96862	7.81059e-08	2.40857e-05	UP
Lmod3	-1.41651	8.41466e-08	2.53587e-05	DOWN
Twistnb	0.853816	8.84631e-08	2.60671e-05	UP
Otud1	2.03078	9.22666e-08	2.65969e-05	UP
Ky	-2.4617	1.07218e-07	2.97824e-05	DOWN
Uck2	1.5116	1.07809e-07	2.97824e-05	UP
Camk2g	-0.701466	2.9272e-07	7.92136e-05	DOWN
Xirp1	1.92578	4.14997e-07	0.000110057	UP
Tcerg1	0.747007	4.26243e-07	0.000110823	UP
Atp13a3	1.022	4.72475e-07	0.000119256	UP
Rnf115	1.18941	4.76665e-07	0.000119256	UP
Csrnp1	1.80912	5.35554e-07	0.000131508	UP
Morc2a	0.707572	6.66949e-07	0.000160795	UP
Rrm2	1.99507	7.65545e-07	0.000179498	UP
Zfp697	1.95276	7.71597e-07	0.000179498	UP
Eddm3b	15.5145	9.58135e-07	0.00021905	UP
Ddx21	0.812816	1.00306e-06	0.000225434	UP
Tsr1	0.894424	1.05642e-06	0.000228182	UP
Has3	-3.79637	1.0572e-06	0.000228182	DOWN
Cgref1	2.82882	1.06691e-06	0.000228182	UP
Gnl3	1.13472	1.14055e-06	0.000240058	UP
Utp20	0.799639	1.2108e-06	0.000250863	UP
Fam160b1	0.810023	1.23477e-06	0.000251893	UP
Shroom3	2.58022	1.31544e-06	0.000264283	UP
Ddx3x	0.874884	1.39169e-06	0.000273791	UP
Eif1a	1.24329	1.40406e-06	0.000273791	UP
Prg4	1.75896	1.4488e-06	0.000276197	UP
Slc39a14	1.78502	1.45805e-06	0.000276197	UP
Angptl4	2.87105	1.49563e-06	0.000279324	UP
Ftsj3	0.811034	1.53257e-06	0.000282248	UP
Asb10	-1.04995	1.62622e-06	0.000295393	DOWN
Atf3	2.92369	1.7414e-06	0.00031204	UP
Arg1	3.45223	1.84263e-06	0.000323103	UP
Fam177a	9.51342	1.85187e-06	0.000323103	UP
Cttn	0.622935	2.03702e-06	0.000346661	UP
Cap2	-0.4335	2.04707e-06	0.000346661	DOWN
Gss	0.802672	2.06532e-06	0.000346661	UP
Ptpn12	1.17604	2.21785e-06	0.000367609	UP
Nprl2	-1.0146	2.36996e-06	0.000387972	DOWN
Mak16	0.805631	2.50921e-06	0.000405519	UP
Atxn10	1.01101	2.53832e-06	0.000405519	UP
Dnmt3a	-0.637206	2.649e-06	0.000418164	DOWN
Hsp90aa1	1.34531	2.74614e-06	0.00042714	UP
Wdr5	0.417785	2.77029e-06	0.00042714	UP
Dph5	0.967482	3.05053e-06	0.000464943	UP
Rassf4	1.58367	3.49448e-06	0.000526554	UP
Ints7	-5.70188	3.69879e-06	0.000551078	DOWN
Itgb6	-1.95561	3.82774e-06	0.000563954	DOWN
Dynll2	-0.595436	3.91228e-06	0.000570075	DOWN
Sf3b1	0.714122	4.39831e-06	0.000633931	UP
Brix1	0.727434	4.66556e-06	0.000665218	UP
Ell	1.00364	4.86357e-06	0.000686074	UP
Nop58	1.06704	5.19957e-06	0.00072575	UP
Sclt1	-5.63812	5.44475e-06	0.000752057	DOWN
Abce1	0.567231	5.71896e-06	0.000781787	UP
Tubb6	1.46127	5.85833e-06	0.000792669	UP
Ddx10	0.537061	6.17589e-06	0.000820801	UP
Srpk3	-0.855781	6.19005e-06	0.000820801	DOWN
Rngtt	-0.701586	6.62113e-06	0.00086927	DOWN
Pde4a	-1.77889	6.88722e-06	0.000895339	DOWN
Oma1	-0.602362	6.96603e-06	0.000896791	DOWN
Med13l	0.688492	7.15345e-06	0.000912065	UP
Fads6	-1.17456	7.99025e-06	0.00100905	DOWN
Cxcl5	5.82285	8.08389e-06	0.00101125	UP
Cd68	1.99428	8.20949e-06	0.00101736	UP
Nav3	1.57454	8.42343e-06	0.00103421	UP
Crhr2	-1.118	8.55852e-06	0.00104116	DOWN
Sbds	0.64767	9.18409e-06	0.0011071	UP
Utp14a	0.680618	9.32101e-06	0.00111348	UP
Clasp2	-0.587327	9.57947e-06	0.0011333	DOWN
Cct2	0.399772	9.65783e-06	0.0011333	UP
Ddx27	0.695164	1.00924e-05	0.00117341	UP
Dhx33	0.853443	1.01766e-05	0.00117341	UP
Atf4	0.595592	1.09076e-05	0.00124686	UP
Gbp5	-2.91739	1.11206e-05	0.00126033	DOWN
Pvr	1.48565	1.23524e-05	0.0013804	UP
Rbbp6	0.492795	1.23882e-05	0.0013804	UP
Glis3	2.29662	1.29258e-05	0.0014283	UP
Fos	3.3634	1.31704e-05	0.0014433	UP
Cmpk1	0.699524	1.36071e-05	0.00147894	UP
Gprc5a	2.76319	1.41247e-05	0.0015216	UP
Arhgef37	2.24657	1.42292e-05	0.0015216	UP
Arf6	1.06475	1.53397e-05	0.00162723	UP
Egr1	2.81695	1.61943e-05	0.00170426	UP
Nt5c3b	-0.60487	1.64741e-05	0.00171185	DOWN
Syngr2	-0.49675	1.65247e-05	0.00171185	DOWN
Pus7	0.62054	1.71139e-05	0.00175915	UP
Rictor	0.674871	1.82444e-05	0.00186005	UP
Ddx18	0.574546	1.83761e-05	0.00186005	UP
Mylk4	-1.78623	1.92436e-05	0.00192629	DOWN
Mindy3	-2.48303	1.9321e-05	0.00192629	DOWN
Trnt1	0.482789	1.95672e-05	0.00193628	UP
Fem1b	0.806393	2.13388e-05	0.00209594	UP
Pdss2	-0.56993	2.25792e-05	0.00215895	DOWN
Tmem94	-0.936719	2.26186e-05	0.00215895	DOWN
Nip7	0.805376	2.27022e-05	0.00215895	UP
Asb5	1.51913	2.27605e-05	0.00215895	UP
Gpr137	-0.806863	2.28391e-05	0.00215895	DOWN
Npepps	-0.638284	2.30569e-05	0.00215895	DOWN
Amigo3	-1.85039	2.3157e-05	0.00215895	DOWN
Hspa1b	2.64483	2.33025e-05	0.00215895	UP
Ndufaf3	-0.960163	2.35753e-05	0.00215895	DOWN
Znrf1	-0.583569	2.36084e-05	0.00215895	DOWN
Clic4	1.19289	2.43643e-05	0.00220657	UP
Glrx	1.08751	2.4467e-05	0.00220657	UP
Nifk	0.728121	2.46284e-05	0.00220657	UP
Asxl1	0.537135	2.5151e-05	0.00222502	UP
Lgr4	0.985773	2.51699e-05	0.00222502	UP
Smad5	0.495756	2.59211e-05	0.00227625	UP
Smg1	0.871819	2.63156e-05	0.00229569	UP
Wapl	0.517598	2.72164e-05	0.00235875	UP
Rap1b	0.74176	2.77255e-05	0.00238728	UP
Klf10	1.52903	2.79693e-05	0.00239273	UP
Sphk1	2.86834	2.82731e-05	0.00240322	UP
Sec22c	-1.04584	2.98104e-05	0.00251774	DOWN
Nop2	0.732489	3.0271e-05	0.00254047	UP
Npm1	0.517032	3.07806e-05	0.00256699	UP
Smap2	-0.521651	3.10359e-05	0.0025721	DOWN
Tnk2	-1.1376	3.12861e-05	0.00257673	DOWN
Siah1a	0.568586	3.27004e-05	0.00267658	UP
Maml1	0.677587	3.35413e-05	0.00272072	UP
Klhdc10	-0.398275	3.365e-05	0.00272072	DOWN
Uhrf1bp1l	0.624253	3.61874e-05	0.00290815	UP
Adamts4	3.66988	3.72783e-05	0.00297477	UP
Cmtm4	0.771259	3.74651e-05	0.00297477	UP
Fkrp	-0.450617	3.79254e-05	0.00299339	DOWN
Anxa7	0.608346	3.81533e-05	0.00299357	UP
P2ry1	-1.43796	3.86373e-05	0.00301371	DOWN
Nfix	-0.542807	3.93639e-05	0.00305243	DOWN
Exd2	-0.745835	3.9764e-05	0.00306553	DOWN
Ehd4	0.873362	4.167e-05	0.0031939	UP
Bach2	1.59934	4.50388e-05	0.00341676	UP
Fbxo30	0.708781	4.5093e-05	0.00341676	UP
Heatr1	1.21451	4.62964e-05	0.00348801	UP
Gzf1	0.672564	4.90484e-05	0.00365094	UP
Tmem132a	-1.15675	4.93126e-05	0.00365094	DOWN
Pgf	2.53411	4.94224e-05	0.00365094	UP
Lhpp	-1.7513	4.95603e-05	0.00365094	DOWN
Rnh1	0.672742	4.9972e-05	0.00366093	UP
Actr3	0.51476	5.18833e-05	0.0037663	UP
Itgb2	2.98409	5.19783e-05	0.0037663	UP
Nfkbiz	1.38074	5.40656e-05	0.00389625	UP
Rpl11	0.423961	5.4691e-05	0.00392001	UP
Degs1	0.744862	5.57521e-05	0.00397459	UP
Wdr26	0.459693	5.76149e-05	0.00407326	UP
Reep3	0.594738	5.77506e-05	0.00407326	UP
Klhl40	1.64601	5.87645e-05	0.00412284	UP
Cyr61	2.18173	6.02071e-05	0.00420182	UP
Sde2	0.575178	6.12316e-05	0.00425095	UP
Hectd1	0.549826	6.27265e-05	0.00433205	UP
Tubd1	-0.96084	6.51552e-05	0.00447646	DOWN
Rhot2	-0.586277	7.38937e-05	0.00501996	DOWN
Eif2b3	0.698918	7.39088e-05	0.00501996	UP
Gm12184	5.39571	7.42015e-05	0.00501996	UP
R3hdm2	-0.380203	7.4938e-05	0.00504405	DOWN
Ubb	0.604771	7.67337e-05	0.00513884	UP
Pan2	1.06367	7.74109e-05	0.00515813	UP
Taco1	-0.526057	7.81093e-05	0.00517865	DOWN
Stx4a	-0.42744	7.98665e-05	0.0052688	DOWN
Ahnak	1.25354	8.07727e-05	0.00530221	UP
Tbc1d15	0.852851	8.2488e-05	0.00536184	UP
Chmp7	-0.407303	8.24899e-05	0.00536184	DOWN
Seh1l	0.480586	8.32417e-05	0.00538432	UP
Ctdnep1	-0.442441	8.63673e-05	0.00555937	DOWN
Psmd11	0.591496	8.73202e-05	0.00557665	UP
Ccl2	3.63159	8.74769e-05	0.00557665	UP
Rrad	2.59711	8.84515e-05	0.00559739	UP
Klc4	-0.770427	8.86465e-05	0.00559739	DOWN
Tmed5	1.17166	8.9081e-05	0.00559817	UP
Trim35	-0.60562	9.0116e-05	0.0056365	DOWN
Phc2	0.539107	9.11018e-05	0.00567141	UP
Cul1	0.429007	9.25334e-05	0.00573361	UP
Usp53	0.956175	9.36268e-05	0.00577438	UP
Cd84	1.95448	9.62881e-05	0.00591102	UP
Akr1e1	-0.685209	9.67834e-05	0.00591404	DOWN
Csnk1e	0.498495	0.00010108	0.00613972	UP
Abhd18	-1.08097	0.000101403	0.00613972	DOWN
Elk4	0.874783	0.000104242	0.00628293	UP
Noc3l	0.762713	0.000106831	0.00640988	UP
Pwp2	0.649949	0.00010821	0.00646334	UP
Ampd3	1.61483	0.00011252	0.00667144	UP
Gna13	0.581223	0.0001127	0.00667144	UP
Dnmt1	-0.722526	0.000115307	0.00679542	DOWN
Pdcd6ip	0.3893	0.000117226	0.00687794	UP
Plekha5	1.07641	0.000118567	0.00692601	UP
Dync1li2	-0.310011	0.000121617	0.007073	DOWN
Ccr1	2.26283	0.000122467	0.00707407	UP
Dnajb9	0.952316	0.000122703	0.00707407	UP
Zfp593	0.909502	0.000124644	0.00715489	UP
Myd88	0.8005	0.00012615	0.00718748	UP
Atp6v1b2	0.452142	0.000126752	0.00718748	UP
Rrp15	0.979536	0.000127253	0.00718748	UP
Dennd4b	-0.533948	0.000127706	0.00718748	DOWN
Pik3r2	-0.764643	0.000127922	0.00718748	DOWN
Cc2d2a	-0.930388	0.000132673	0.00742296	DOWN
Ankrd35	5.5085	0.000134442		UP
Sdad1	0.598691	0.000135721	0.00756159	UP
Hspb1	1.43187	0.000141566	0.00785424	UP
Atp13a2	-0.896364	0.000143346	0.00791985	DOWN
Fosl1	2.66283	0.00014496	0.00797579	UP
2700097O09Rik	-1.12108	0.000146678	0.00802419	DOWN
Alms1	-1.64434	0.000147602	0.00802419	DOWN
Atf6	0.527099	0.000147655	0.00802419	UP
Nuak2	1.86083	0.000149454	0.00808884	UP
Hspb8	1.12528	0.000151259	0.00815321	UP
Top2b	0.427025	0.000153325	0.00819194	UP
Plekhj1	-1.19065	0.000153414	0.00819194	DOWN
Sdhaf4	-0.561385	0.000153831	0.00819194	DOWN
Rpl13a	0.774751	0.000155825	0.00826497	UP
Taf4b	0.905869	0.000157718	0.00833203	UP
Nolc1	0.817101	0.000159604	0.00839819	UP
Zfp655	0.817261	0.000161498	0.00846429	UP
Chd1	0.655877	0.00016219	0.0084671	UP
Fam120a	-0.272903	0.000163242	0.00847606	DOWN
Mkl1	-0.848937	0.00016364	0.00847606	DOWN
Pikfyve	0.59477	0.000169065	0.00872297	UP
BC005537	0.388155	0.000169737	0.0087237	UP
Bcs1l	-0.856975	0.000179204	0.00917471	DOWN
Spata5	0.780305	0.000181339	0.00924831	UP
Socs3	1.73533	0.000182758	0.00928494	UP
Cmc2	-0.788828	0.000186166	0.00942199	DOWN
Gar1	0.858998	0.000187853	0.00942713	UP
Sp3	0.664002	0.000188563	0.00942713	UP
Fgfr1op	-0.60395	0.000188892	0.00942713	DOWN
Braf	0.619091	0.000189111	0.00942713	UP
Eif2s2	0.353832	0.000192389	0.00955461	UP
Zhx2	-0.576843	0.000193893	0.00959334	DOWN
AA467197	5.10073	0.000199858	0.00985174	UP
Rnf19a	0.614414	0.000208784	0.0102536	UP
Cblb	0.98653	0.000212438	0.0103946	UP
Slco5a1	-0.652187	0.000218282	0.0106412	DOWN
Nol10	0.689489	0.000221948	0.0107803	UP
Zbtb43	0.588083	0.000223045	0.0107941	UP
Mrm2	-0.832553	0.000227557	0.0109402	DOWN
Tpp2	0.386135	0.000227715	0.0109402	UP
Adamts9	1.5877	0.000231312	0.0110729	UP
Acot9	0.747068	0.000234696	0.0111945	UP
Gclc	0.757682	0.00024461	0.0116255	UP
Mphosph10	0.619247	0.000248394	0.0117632	UP
Mrpl34	-0.842816	0.000256162	0.0120879	DOWN
Fam168b	0.368965	0.000263037	0.0123683	UP
Inpp5j	-1.37895	0.000264554	0.0123869	DOWN
Dus1l	0.675943	0.000265301	0.0123869	UP
Mios	0.432271	0.000272855	0.0126683	UP
Baz1a	0.950383	0.000274012	0.0126683	UP
Dyrk1a	0.377136	0.000274193	0.0126683	UP
Sec62	0.314519	0.000276827	0.012701	UP
2310002L09Rik	0.629226	0.000278556	0.012701	UP
Myc	2.22644	0.000278683	0.012701	UP
Fam126b	0.75437	0.000278732	0.012701	UP
Smpd1	-0.43501	0.000283844	0.0128896	DOWN
Ifrd1	1.44337	0.000286015	0.0129387	UP
Rcn3	-0.965747	0.000287825	0.0129387	DOWN
Rwdd2b	-0.857752	0.000287853	0.0129387	DOWN
Gtpbp4	0.609665	0.000289512	0.0129693	UP
Rai14	0.962156	0.00030167	0.01345	UP
Zc3h8	-0.728128	0.000302633	0.01345	DOWN
Rnpep	-0.78378	0.000303284	0.01345	DOWN
Mex3c	0.652179	0.000305283	0.0134842	UP
Jmjd8	-0.607787	0.00030609	0.0134842	DOWN
Srfbp1	0.648154	0.00030714	0.0134857	UP
Cntrob	-5.38102	0.000308373	0.0134926	DOWN
Wdr3	0.62144	0.000309333	0.0134926	UP
Tom1l1	-0.601826	0.000313616	0.0136346	DOWN
Chil3	3.0021	0.000317137	0.0137426	UP
S100a10	1.10426	0.000318182	0.013743	UP
Clk4	0.557462	0.000319816	0.0137687	UP
Snap47	-0.643014	0.000329074	0.0140345	DOWN
Mustn1	1.24713	0.000329693	0.0140345	UP
Nol8	0.65727	0.000331061	0.0140345	UP
Osmr	1.03158	0.00033124	0.0140345	UP
Ldlr	1.557	0.000331282	0.0140345	UP
Ammecr1	0.81457	0.000337059	0.0142338	UP
Bbs7	-0.883741	0.000340357	0.0143274	DOWN
Hif1an	-0.374062	0.000342226	0.0143605	DOWN
Stxbp4	-1.21299	0.000346099	0.0144772	DOWN
Cd44	1.59369	0.000351655	0.0146633	UP
Mlxipl	-1.14233	0.000353648	0.0146831	DOWN
Pex6	-0.852375	0.000354737	0.0146831	DOWN
Serpina3m	1.95787	0.00035545	0.0146831	UP
Myh7b	-1.1119	0.00035698	0.0146875	DOWN
Abcd1	-0.689202	0.000357773	0.0146875	DOWN
Nisch	-0.370423	0.000368504	0.0150813	DOWN
Bloc1s5	-0.701861	0.000371157	0.0151282	DOWN
Smcr8	0.588185	0.00037215	0.0151282	UP
Grb14	-1.14221	0.00037307	0.0151282	DOWN
Col4a5	-1.02757	0.000378541	0.0152725	DOWN
Sec14l5	-2.03401	0.000378933	0.0152725	DOWN
Deaf1	-1.38125	0.000380147	0.015275	DOWN
Zfp791	-1.78262	0.000385862	0.0154578	DOWN
2010003K11Rik	2.87561	0.000389679	0.0155637	UP
Zfp52	1.13528	0.000391133	0.0155749	UP
Med29	-0.489853	0.000392602	0.0155865	DOWN
Hbegf	2.1812	0.000396256	0.0156767	UP
Colq	-1.05766	0.000397237	0.0156767	DOWN
Sqstm1	0.419926	0.000401674	0.0158048	UP
Qsox1	0.71777	0.000403496	0.0158294	UP
Dnajc16	-0.501205	0.000409081	0.0160012	DOWN
Hexdc	-1.24796	0.000415389	0.016194	DOWN
Polr3e	0.489292	0.000416451	0.016194	UP
Fbxl22	-1.96502	0.000419491	0.0162437	DOWN
Lman2l	-1.04232	0.00042188	0.0162437	DOWN
Zfp428	-1.08157	0.000421998	0.0162437	DOWN
Dglucy	-1.0887	0.000422631	0.0162437	DOWN
Cep89	-0.8594	0.000424167	0.0162515	DOWN
Msr1	2.03103	0.000425285	0.0162515	UP
Abl1	-0.493573	0.000434763	0.016504	DOWN
Rcsd1	-0.653148	0.000435276	0.016504	DOWN
Exoc7	-0.479699	0.000435922	0.016504	DOWN
Pm20d1	-1.54375	0.000436872	0.016504	DOWN
Kmt5c	-1.04137	0.000438353	0.016513	DOWN
Plcxd2	2.0781	0.00044586	0.0167482	UP
Stac3	-0.691157	0.000448326	0.0167932	DOWN
Cog7	-0.507887	0.000460968	0.0172181	DOWN
Raly	-0.353812	0.000466728	0.0173477	DOWN
Mbtd1	0.594988	0.000467055	0.0173477	UP
Rtn4ip1	-0.601408	0.000469568	0.0173678	DOWN
Eny2	0.610991	0.000470214	0.0173678	UP
Ch25h	3.12993	0.000476678	0.0175576	UP
Znrd1as	-0.745455	0.0004799	0.0176001	DOWN
Yrdc	0.774481	0.000480485	0.0176001	UP
Tmem150a	-0.761445	0.000482363	0.0176202	DOWN
Prepl	-0.853082	0.00048413	0.0176362	DOWN
Dusp22	-0.528133	0.00048895	0.0177203	DOWN
Dusp5	3.0507	0.000489112	0.0177203	UP
Pa2g4	0.320279	0.000499403	0.0180419	UP
Sv2b	1.17098	0.00050071	0.0180419	UP
Prkaa2	-0.575899	0.000502792	0.0180678	DOWN
F830016B08Rik	-1.83795	0.000507396	0.018184	DOWN
Hmga2	4.35352	0.000508841		UP
Xrcc5	-0.728929	0.000511796	0.0182922	DOWN
Nqo2	-0.725535	0.000520065	0.0185151	DOWN
Ing5	0.829549	0.000520825	0.0185151	UP
Psat1	1.90121	0.000522412	0.0185219	UP
Jph2	-0.797155	0.000528442	0.0186857	DOWN
Clp1	0.95043	0.000533544	0.0187768	UP
Lsmem1	-1.28361	0.000533851	0.0187768	DOWN
Atp6v1h	0.545542	0.000535949	0.0188008	UP
Rnf4	0.563715	0.000537787	0.0188155	UP
Rel	0.885153	0.000541893	0.0189092	UP
Dyrk2	0.620569	0.000545217	0.0189516	UP
Rad23b	0.304203	0.000545965	0.0189516	UP
Umad1	-0.697634	0.000554737	0.0192017	DOWN
Gmfb	0.439622	0.000556067	0.0192017	UP
Tmx2	-0.59347	0.000559011	0.0192532	DOWN
Inppl1	-0.659847	0.000563707	0.0193646	DOWN
Bzw2	-0.515812	0.000568967	0.0194948	DOWN
Scn2a	-1.61007	0.00057188	0.0195441	DOWN
Tmem260	-0.680337	0.000573783	0.0195588	DOWN
Myoz3	-1.05676	0.000581272	0.0197611	DOWN
Pon2	0.467987	0.000584667	0.0197611	UP
Acat2	-1.04011	0.00058931	0.0197611	DOWN
Chuk	0.579615	0.000589925	0.0197611	UP
Hikeshi	-0.641073	0.000590856	0.0197611	DOWN
Gdi2	0.294555	0.000590903	0.0197611	UP
Myl12a	0.675604	0.000590988	0.0197611	UP
Arpp19	0.590284	0.000591641	0.0197611	UP
Arhgap26	0.806635	0.000593232	0.0197645	UP
Tmem246	-0.552421	0.000603668	0.0200548	DOWN
Sesn3	-0.623506	0.00060497	0.0200548	DOWN
Csnk1a1	0.351971	0.00060844	0.0201195	UP
Map2k3	0.512265	0.000611688	0.0201766	UP
Nmrk2	1.84479	0.000615457	0.0202505	UP
Secisbp2l	0.470381	0.000617293	0.0202606	UP
Ppp5c	-0.299202	0.000622322	0.0203753	DOWN
Mid1	0.905711	0.000631895	0.0206378	UP
Polq	-2.56287	0.000637554	0.0207714	DOWN
Ctnna1	0.42316	0.000648263	0.0210685	UP
Bcor	0.641973	0.000650002	0.0210734	UP
Efhd2	0.937648	0.000654615	0.0211502	UP
Adck1	-0.711872	0.000655562	0.0211502	DOWN
Acot6	0.824589	0.00066592	0.0214323	UP
Arid5a	1.20567	0.000679726	0.0217053	UP
Dhfr	-1.1838	0.000681	0.0217053	DOWN
Rpusd1	-0.812522	0.000682378	0.0217053	DOWN
Slc30a4	0.572299	0.000682475	0.0217053	UP
Abhd16a	-0.492728	0.00068392	0.0217053	DOWN
Lrrc58	0.802423	0.000685096	0.0217053	UP
Prkaca	-0.521789	0.00068586	0.0217053	DOWN
Ss18l2	-0.484806	0.000687575	0.0217077	DOWN
Hhatl	1.61374	0.000695965	0.0219204	UP
Syt12	1.23203	0.000704746	0.0221444	UP
Tars	0.542712	0.000708819	0.0222116	UP
Opa3	-0.321507	0.000710235	0.0222116	DOWN
Prkaa1	0.71428	0.000713554	0.0222629	UP
Sec23ip	0.394133	0.000718635	0.0223688	UP
Zkscan1	0.506848	0.00072416	0.0224774	UP
Clec3b	-1.29995	0.000725516	0.0224774	DOWN
Sorl1	-1.31262	0.000734029	0.0226777	DOWN
Pi15	1.4576	0.0007354	0.0226777	UP
Ccl7	3.37227	0.000743312	0.0228685	UP
Elp5	-0.615341	0.000750319	0.0230086	DOWN
Ccdc22	-0.588472	0.000751939	0.0230086	DOWN
Tmod4	-0.647581	0.000753071	0.0230086	DOWN
Lrrc8d	0.898647	0.000756025	0.0230457	UP
Eps8	0.839325	0.000762362	0.0231856	UP
Tut1	0.645825	0.000769382	0.0233456	UP
Zswim4	0.790476	0.000775628	0.0234813	UP
Hnrnpab	0.447951	0.00077867	0.0235061	UP
Clcn1	-0.905758	0.00077999	0.0235061	DOWN
Narf	-0.583008	0.000785598	0.0236214	DOWN
Mical2	1.07563	0.000788825	0.0236647	UP
Tmem125	3.01553	0.000799772	0.0239175	UP
Gm13889	1.70372	0.000800857	0.0239175	UP
Gclm	0.915978	0.000805351	0.0239312	UP
Cnot8	-0.411053	0.000807883	0.0239312	DOWN
Akirin1	0.458919	0.000808829	0.0239312	UP
Rgl3	-2.42484	0.000810065	0.0239312	DOWN
Btrc	-0.672239	0.000810339	0.0239312	DOWN
Naa60	-3.17165	0.000812242	0.0239341	DOWN
Gpaa1	-0.50715	0.000829415	0.0243859	DOWN
Naa25	0.581842	0.000840484	0.0246567	UP
Adam12	2.30706	0.000845053	0.0247337	UP
Agpat1	-0.5449	0.000846841	0.0247337	DOWN
Cast	0.513211	0.000855933	0.0249443	UP
Ankrd40	-0.368602	0.000884356	0.0257162	DOWN
Olfr1033	1.2402	0.000899237	0.0260665	UP
Adrb3	-2.3545	0.000900337	0.0260665	DOWN
Mib1	0.38269	0.000911138	0.0263218	UP
Met	0.740051	0.000931931	0.0268639	UP
Gpr107	-0.361004	0.000936879	0.026948	DOWN
BC052040	-1.40277	0.000941467	0.0270071	DOWN
Marveld2	2.20575	0.0009455	0.0270071	UP
Srf	-0.643328	0.000946669	0.0270071	DOWN
Kbtbd4	-0.634142	0.000947081	0.0270071	DOWN
Gng12	0.488353	0.000952767	0.0271109	UP
Reep1	-0.606648	0.000961011	0.0272354	DOWN
Upp1	2.19609	0.000962395	0.0272354	UP
Zfand4	4.61881	0.000964798	0.0272354	UP
Iqcc	-0.729121	0.000965359	0.0272354	DOWN
Rin1	1.38294	0.000968696	0.0272716	UP
Abr	1.14392	0.000973141	0.0273159	UP
Pim1	1.45286	0.000974886	0.0273159	UP
Fgf1	1.13301	0.000976451	0.0273159	UP
Tmem53	-1.06652	0.000990045	0.0276379	DOWN
5730409E04Rik	-0.569408	0.00100257	0.0279266	DOWN
Ak3	-0.531603	0.0010046	0.0279266	DOWN
Zer1	-0.457651	0.00101117	0.0280503	DOWN
Bet1l	0.615725	0.00106205	0.0294003	UP
Mmachc	-0.461732	0.00106786	0.0294996	DOWN
Dnttip2	0.50453	0.00107307	0.029582	UP
Maz	-0.422441	0.00108479	0.0297981	DOWN
Cby1	-0.824415	0.00108541	0.0297981	DOWN
Sobp	-0.717617	0.00110817	0.0302587	DOWN
Gpr180	-0.442591	0.00110862	0.0302587	DOWN
Gm340	1.37927	0.00110903	0.0302587	UP
Cyhr1	-0.434748	0.00112703	0.0306866	DOWN
Sbno2	0.916552	0.00113359	0.0308022	UP
Ccl6	1.8018	0.00115071	0.0312032	UP
Uxt	-1.46875	0.00115582	0.0312778	DOWN
Runx1	2.81771	0.00117876	0.0318338	UP
Zfyve1	0.52775	0.00119427	0.0321871	UP
Alkbh7	-0.65206	0.00122163	0.0328322	DOWN
Nckap5	-1.3963	0.00122316	0.0328322	DOWN
Atp6ap2	0.382912	0.00122578	0.0328361	UP
Nab1	0.514116	0.00123802	0.0330232	UP
Casq2	-1.00663	0.00123945	0.0330232	DOWN
Mettl9	0.554975	0.00124024	0.0330232	UP
Rock2	0.810429	0.00124974	0.0332096	UP
Glt8d1	-0.897505	0.00125373	0.0332488	DOWN
Ces2g	-2.14227	0.00126105	0.0333314	DOWN
Stub1	-0.393527	0.00126187	0.0333314	DOWN
Osbpl6	-1.06139	0.00126752	0.0333628	DOWN
Ankrd52	-0.551411	0.00126809	0.0333628	DOWN
Zscan29	0.527452	0.00127628	0.0335119	UP
Klf6	1.21035	0.00128491	0.0336149	UP
Spry2	1.12436	0.00128527	0.0336149	UP
Rhoq	-0.516299	0.00129991	0.0339307	DOWN
Mmp19	1.43979	0.00132027	0.0343286	UP
Enc1	1.28458	0.00132033	0.0343286	UP
Ppp4r3a	0.428178	0.00132351	0.034344	UP
Rnd1	1.15296	0.00132865	0.03441	UP
Saa3	2.43179	0.00133445	0.0344929	UP
Setd2	0.521479	0.00134611	0.0347266	UP
Gm33543	-6.40061	0.00134877	0.0347275	DOWN
Ttc23	-1.13187	0.00135916	0.0349272	DOWN
Hmbs	-0.587653	0.00136944	0.0350493	DOWN
Rela	0.402669	0.00137332	0.0350493	UP
Cdkn1a	1.84762	0.00137353	0.0350493	UP
Fam214b	0.56742	0.00137448	0.0350493	UP
Vkorc1l1	0.398253	0.00138623	0.0352809	UP
Cd81	-0.327801	0.00139667	0.0354744	DOWN
Zc3h12c	0.791919	0.00139918	0.0354744	UP
Zfp568	0.850809	0.0014383	0.0363967	UP
Dtl	2.62267	0.00144184		UP
Grb2	-0.295596	0.00144536	0.0365057	DOWN
Fam78a	-1.64006	0.00145205	0.036605	DOWN
Pdk4	1.94849	0.00145572	0.0366069	UP
Usp28	0.838913	0.00145765	0.0366069	UP
Grwd1	0.714288	0.00148596	0.0372472	UP
Anks1	-0.79562	0.00149398	0.0373285	DOWN
Etnppl	3.21888	0.00149692	0.0373285	UP
Sirt1	1.66405	0.00149764	0.0373285	UP
Ctdp1	0.649201	0.00151163	0.0376063	UP
6430571L13Rik	-1.00716	0.00151808	0.0376839	DOWN
Ptpn2	0.65073	0.00152043	0.0376839	UP
Elf1	0.638169	0.00154752	0.0382838	UP
Prrc2c	0.45374	0.00155071	0.0382912	UP
Pafah1b2	0.36355	0.0015598	0.0384227	UP
Hnrnpk	0.3932	0.00156386	0.0384227	UP
Pde6d	-0.546592	0.00156472	0.0384227	DOWN
Tpgs2	-0.622683	0.00157493	0.0386018	DOWN
Cd101	4.38365	0.00159577		UP
Nop16	0.532327	0.00159789	0.0389797	UP
Mettl13	0.871792	0.00159902	0.0389797	UP
Hif1a	0.55709	0.00159917	0.0389797	UP
1810009A15Rik	-0.684143	0.00161045	0.0391828	DOWN
Lox	1.69684	0.00161835	0.0392425	UP
Nsun4	-0.51335	0.00161883	0.0392425	DOWN
Tmem82	4.42146	0.0016258	0.0393397	UP
Flad1	-0.575827	0.00163552	0.0395027	DOWN
Pprc1	0.741272	0.00165397	0.0398553	UP
Akr1c13	-3.30123	0.00165613	0.0398553	DOWN
Med13	0.54006	0.00166679	0.0400391	UP
Rsl1d1	0.455044	0.00167586	0.0401843	UP
Usp31	0.634808	0.001681	0.0402348	UP
Trmt12	-0.686169	0.00169775	0.0405625	DOWN
Hlcs	-0.50313	0.00170614	0.0406325	DOWN
Ankrd13a	0.586205	0.001707	0.0406325	UP
Epc2	0.49338	0.00171187	0.0406325	UP
Cacna1g	-1.20305	0.00171294	0.0406325	DOWN
Kcna7	-0.606513	0.00172091	0.0407486	DOWN
Tollip	0.290484	0.00172738	0.0408291	UP
Polr1b	0.519127	0.00174996	0.0412891	UP
Lgals3	1.30365	0.00178066	0.0419387	UP
Gtf3c1	-0.455292	0.00180418	0.0423629	DOWN
Slc46a3	-1.05997	0.00181037	0.0423629	DOWN
Coprs	-0.632011	0.00181133	0.0423629	DOWN
Tent4a	0.718386	0.00181144	0.0423629	UP
Eef1a1	0.431835	0.0018175	0.0423926	UP
Klf5	1.73811	0.00181911	0.0423926	UP
Plet1	2.34313	0.00183657	0.0426518	UP
Dhrs7c	-0.598484	0.00183667	0.0426518	DOWN
Mtdh	0.38048	0.00184924	0.0428687	UP
Tma16	0.739843	0.00186184	0.0430856	UP
Gmpr	-0.955714	0.0018672	0.0431343	DOWN
Isg20l2	0.546169	0.00187403	0.0432167	UP
Fbxo3	-0.366707	0.00188277	0.0433094	DOWN
Mtpn	0.491703	0.00188554	0.0433094	UP
Afg1l	-0.62924	0.00188785	0.0433094	DOWN
Twf1	0.42312	0.00189353	0.0433647	UP
Flnc	1.34557	0.00190667	0.0435378	UP
Sik1	1.20445	0.00190765	0.0435378	UP
Aars2	-0.599732	0.00191593	0.0436515	DOWN
Sf3b3	0.467023	0.00192335	0.0437455	UP
Mindy1	0.448519	0.00193919	0.0440302	UP
Cand1	0.360877	0.00195984	0.044423	UP
Man1b1	-0.365673	0.00196633	0.0444511	DOWN
Sdk2	1.55882	0.00197077	0.0444511	UP
Fsd2	-0.860642	0.00197249	0.0444511	DOWN
Apold1	1.77181	0.00197449	0.0444511	UP
Ddx42	0.269966	0.00198338	0.0445468	UP
Dcaf5	-0.268157	0.00198546	0.0445468	DOWN
Oser1	0.3931	0.00199017	0.044547	UP
Fnbp4	0.442312	0.00199218	0.044547	UP
Mrpl39	-0.446628	0.00200691	0.0448008	DOWN
Sdc4	1.11783	0.00201503	0.0449063	UP
Rchy1	0.385232	0.00202376	0.0450254	UP
Mier3	4.05937	0.00204426	0.0454051	UP
Ttc21b	-0.930719	0.00207735	0.0460629	DOWN
Pkp2	0.715945	0.00208755	0.0461428	UP
Eif3a	0.371633	0.00209018	0.0461428	UP
Rbm15	0.653301	0.00209139	0.0461428	UP
Cpn1	2.8045	0.00210505	0.0463671	UP
Xpa	0.884927	0.0021191	0.0465992	UP
Tmem126b	-0.596228	0.00213975	0.0468873	DOWN
A130010J15Rik	-0.701034	0.00214234	0.0468873	DOWN
Gnb5	-0.942716	0.00214307	0.0468873	DOWN
Npat	0.603407	0.00214635	0.0468873	UP
Tmem251	0.645598	0.00215663	0.0470345	UP
Ptdss1	-0.577022	0.00216404	0.0471073	DOWN
Eral1	-0.61164	0.00217059	0.0471073	DOWN
Dhodh	-0.626992	0.00217063	0.0471073	DOWN
Mybbp1a	0.430304	0.00217456	0.0471155	UP
Hsd11b2	2.22299	0.00217751		UP
Castor2	-0.796719	0.00219476	0.0474755	DOWN
Api5	0.275777	0.00221598	0.0478163	UP
Entpd6	-0.659499	0.00222008	0.0478163	DOWN
Cpm	0.731013	0.00222133	0.0478163	UP
Rnf31	-0.475894	0.00222727	0.0478664	DOWN
Mrpl35	-0.422206	0.00224576	0.0481858	DOWN
Wac	0.294435	0.00225542	0.0482243	UP
Wfdc1	-1.09704	0.00225558	0.0482243	DOWN
Pgm2	0.944969	0.00226016	0.0482243	UP
Rlim	0.519418	0.0022621	0.0482243	UP
Actr2	0.317074	0.00227236	0.0483652	UP
Anxa2	1.25325	0.00228334	0.0485209	UP
Son	0.411675	0.00228816	0.0485457	UP
Sgms2	2.09387	0.00229661	0.0486471	UP
Zfp623	0.792659	0.00230713	0.048792	UP
Fnta	-0.466577	0.00231526	0.0488368	DOWN
Mterf2	-0.788547	0.00231686	0.0488368	DOWN
Ugcg	0.712733	0.0023203	0.0488368	UP
Slc20a1	1.19852	0.0023314	0.0489927	UP
Smtn	-0.94997	0.0023459	0.0491529	DOWN
Ifit1bl1	3.51983	0.00234644	0.0491529	UP
Smc6	-1.02381	0.00235603	0.0492563	DOWN
Pmm1	0.622113	0.00235935	0.0492563	UP
Nasp	0.476486	0.00236252	0.0492563	UP
Cxcl9	-1.94092	0.00236726	0.0492777	DOWN
Kdm3a	0.539173	0.00238431	0.0495089	UP
Sypl2	-1.00857	0.00238871	0.0495089	DOWN
Adpgk	0.782822	0.00238957	0.0495089	UP
Ppp1r12b	-0.418745	0.00241655	0.0499898	DOWN
Rab9	0.565991	0.00242704	0.0501287	UP
Zfp799	-0.704042	0.00244483	0.0504002	DOWN
Eif3d	0.349648	0.00244933	0.0504002	UP
Ttl	-0.457644	0.00245159	0.0504002	DOWN
Kbtbd2	0.40386	0.00246346	0.0504821	UP
Rab21	-0.224522	0.0024635	0.0504821	DOWN
Tbc1d31	-1.64682	0.002467	0.0504821	DOWN
Lgi2	-1.26969	0.00247345	0.0505362	DOWN
Pomk	-0.817705	0.00248514	0.0506969	DOWN
Pdpk1	0.445673	0.0024927	0.0507729	UP
Phf24	1.59095	0.00249996	0.0508428	UP
Fam83c	2.99554	0.00250212		UP
Rtp4	-0.836639	0.00251422	0.0508587	DOWN
Syncrip	0.430819	0.00252029	0.0508587	UP
Pzp	-4.07889	0.0025215	0.0508587	DOWN
Pnkd	-0.597454	0.0025237	0.0508587	DOWN
Hps5	-0.669577	0.00252842	0.0508587	DOWN
Nfat5	0.759064	0.00252927	0.0508587	UP
Ppm1k	-0.762844	0.00253182	0.0508587	DOWN
BC005624	-0.394497	0.00253473	0.0508587	DOWN
Fndc4	1.21504	0.00253526	0.0508587	UP
Stbd1	-0.928449	0.00254112	0.0508993	DOWN
Tcp11l2	0.759974	0.00255303	0.0510606	UP
Nsun2	0.349797	0.00257609	0.0513919	UP
B4galt6	0.985816	0.00257735	0.0513919	UP
Taf6	-0.420687	0.00259414	0.051605	DOWN
Hamp	-3.65539	0.00259582	0.051605	DOWN
Vps4b	0.338135	0.00261704	0.051949	UP
Cenpj	-0.948811	0.00262711	0.052071	DOWN
Gnl2	0.44328	0.00263443	0.0521382	UP
Bend6	-3.50358	0.00263761		DOWN
Zfp651	-0.60368	0.00264951	0.0523078	DOWN
Ganc	-0.743965	0.00265089	0.0523078	DOWN
Nrf1	0.436161	0.00266803	0.052406	UP
Setd5	0.417724	0.00267393	0.052406	UP
Lmcd1	1.0702	0.00267544	0.052406	UP
Trafd1	0.82044	0.00267572	0.052406	UP
Tuba1c	2.11406	0.00268084	0.052406	UP
Zfp948	1.06567	0.00268532	0.052406	UP
Map3k4	-0.515749	0.00268725	0.052406	DOWN
Paqr7	-1.39732	0.00268749	0.052406	DOWN
Ablim2	-0.736576	0.00269309	0.0524381	DOWN
Kdm5a	0.434222	0.00270118	0.0525186	UP
Rfc1	-0.417343	0.00271372	0.0526851	DOWN
Egflam	-0.883948	0.00271977	0.0527135	DOWN
Camsap2	0.454558	0.00272314	0.0527135	UP
Larp7	-0.420384	0.00275954	0.0533404	DOWN
Runx3	3.59717	0.00276009		UP
Map7d1	-0.646179	0.00277331	0.0533838	DOWN
Stat1	-0.700639	0.00277367	0.0533838	DOWN
Mtif2	-0.393067	0.00277815	0.0533838	DOWN
Agl	-0.545801	0.00277964	0.0533838	DOWN
Trmt10a	0.828079	0.00278191	0.0533838	UP
Gm826	-0.911934	0.00279096	0.05348	DOWN
Gmfg	1.41177	0.00283046	0.0541586	UP
Edem1	0.666085	0.00283962	0.0542556	UP
Apeh	-0.43592	0.00284915	0.0543105	DOWN
Mup11	4.61192	0.00285069	0.0543105	UP
Usp6nl	0.667641	0.00285871	0.0543852	UP
Eif5	0.476894	0.00286294	0.0543877	UP
Cgrrf1	-0.363341	0.00289192	0.0548596	DOWN
Cstb	0.545781	0.00290431	0.055016	UP
Rmi2	-2.30616	0.00294187		DOWN
Anxa5	0.642488	0.00294508	0.0557086	UP
Erc1	-0.377287	0.0029685	0.0560717	DOWN
Itsn1	-0.589355	0.002979	0.0561899	DOWN
Hnrnpc	0.376999	0.00299505	0.0563421	UP
Bzw1	0.324036	0.00299557	0.0563421	UP
Rbp7	1.45788	0.00303777	0.057055	UP
Spsb1	1.29374	0.00305279	0.0571489	UP
Hrg	-3.8104	0.00305378	0.0571489	DOWN
Slc25a35	-1.01192	0.0030557	0.0571489	DOWN
Lsm10	-0.857728	0.00307402	0.0574105	DOWN
Slc2a1	1.13115	0.00308048	0.0574504	UP
Chac2	-0.826252	0.00309836	0.0577026	DOWN
Gm49383	3.61988	0.0031104		UP
Rida	-0.795531	0.00311127	0.0578618	DOWN
Wipi2	0.250497	0.00312249	0.057989	UP
Col24a1	-1.36469	0.00315193		DOWN
Trp53bp1	-0.788845	0.00316984	0.0587469	DOWN
Vcl	0.722459	0.00317215	0.0587469	UP
Hoxc10	-0.525645	0.00318162	0.0587809	DOWN
Cog5	-0.551958	0.00318455	0.0587809	DOWN
Gtf3c4	0.329793	0.00319083	0.0587809	UP
Dnase1l1	-0.492447	0.00319856	0.0587809	DOWN
Acot11	-1.03394	0.00319891	0.0587809	DOWN
Hacl1	-1.11359	0.00320059	0.0587809	DOWN
Mettl6	0.496174	0.0032083	0.058841	UP
Rmnd1	-0.60434	0.00323185	0.0591781	DOWN
Tceal1	-0.867691	0.0032356	0.0591781	DOWN
Copg2	-0.457408	0.00326315	0.0595996	DOWN
Agt	1.13542	0.00327541	0.0597413	UP
Nudt4	0.550409	0.00328583	0.0598491	UP
Dnajc5	0.393201	0.00333931	0.0607397	UP
AU022252	-0.526543	0.00335438	0.0609303	DOWN
Kdm5c	0.492032	0.00336463	0.0610329	UP
Pkd1l3	1.2365	0.00339064	0.0614207	UP
Cdh23	-2.56964	0.00341076	0.0617008	DOWN
Med7	0.472717	0.00343373	0.0620296	UP
Chid1	-0.716084	0.00343829	0.0620296	DOWN
Dnaja1	0.700273	0.00345494	0.0622452	UP
Sdcbp	0.373852	0.00346674	0.0623731	UP
Zswim9	-0.532572	0.00348883	0.0626369	DOWN
Ppp2r3a	-0.512635	0.00349085	0.0626369	DOWN
Ltb4r1	2.0298	0.00349851		UP
Mrpl10	-0.338331	0.00350708	0.0628431	DOWN
Ube2q2	0.354186	0.003512	0.0628463	UP
Foxk1	0.421706	0.0035316	0.063112	UP
Cradd	-0.692512	0.00354584	0.06321	DOWN
Prpf40a	0.383377	0.00354663	0.06321	UP
Pes1	0.366613	0.00356108	0.0633114	UP
Ptbp1	0.630377	0.00357238	0.0633114	UP
Rnf121	-0.406834	0.00357696	0.0633114	DOWN
Timp1	1.58148	0.00358158	0.0633114	UP
Crebbp	0.323465	0.00358333	0.0633114	UP
Phip	0.499348	0.00358457	0.0633114	UP
Thumpd1	0.335351	0.00358574	0.0633114	UP
Zcchc7	0.528429	0.00360084	0.0634936	UP
Nup133	-0.331289	0.00360636	0.0635065	DOWN
Alpk2	0.832088	0.00363005	0.0638389	UP
Nufip1	0.510865	0.0036483	0.0640186	UP
Ggnbp2	0.417994	0.00364993	0.0640186	UP
Tmem63a	-0.491547	0.0036643	0.0641858	DOWN
Hspa1a	1.73166	0.00368708	0.0644996	UP
Clec4d	4.23325	0.00369992	0.0646389	UP
Tmem219	-0.591849	0.00371196	0.0647639	DOWN
Etf1	0.290842	0.00372196	0.064853	UP
Spty2d1	0.662424	0.00372767	0.0648673	UP
Slc26a6	-0.926408	0.00377192	0.0655514	DOWN
Nol11	0.359296	0.00380103	0.0659708	UP
Zfp775	-0.600486	0.00380978	0.0659723	DOWN
Wdr74	0.507286	0.00381368	0.0659723	UP
Mtg2	-1.02459	0.00381604	0.0659723	DOWN
Hrct1	1.09042	0.0038473	0.06637	UP
Echdc2	0.923185	0.00385007	0.06637	UP
Slc29a1	-0.643652	0.00385429	0.06637	DOWN
Gnai3	0.517668	0.00385907	0.06637	UP
Srm	0.765482	0.00388445	0.06672	UP
Pih1d1	-0.45201	0.0039151	0.0671532	DOWN
Gins2	5.50951	0.00392105	0.0671532	UP
C1qbp	0.359899	0.00392486	0.0671532	UP
Taf5l	0.418654	0.00393454	0.0672319	UP
Adk	-0.529782	0.00394661	0.0673515	DOWN
Zfp36l2	0.898475	0.00397469	0.0677051	UP
Plin2	1.32367	0.00397755	0.0677051	UP
Gmnn	-0.723375	0.00399408	0.0678993	DOWN
Klhl8	-0.775115	0.00401049	0.0680206	DOWN
Bclaf1	0.500636	0.00401178	0.0680206	UP
Slc24a3	4.85355	0.0040166	0.0680206	UP
Pkia	-0.53436	0.00403092	0.0681761	DOWN
Cdk13	0.370424	0.00403691	0.0681904	UP
Crot	-0.604713	0.00404737	0.0682801	DOWN
Wdr7	-0.415063	0.00406745	0.0685191	DOWN
Ncapd2	-0.684382	0.00407187	0.0685191	DOWN
Slfn2	1.04375	0.0040847	0.0686478	UP
Nle1	0.962535	0.00410497	0.0689011	UP
Pqbp1	-0.491812	0.00411233	0.0689374	DOWN
Ttc30a1	-1.18788	0.00412527	0.0690671	DOWN
Rab5a	0.331745	0.00415379	0.0693764	UP
Synm	-0.571645	0.00415916	0.0693764	DOWN
Slc4a4	-0.740089	0.00415945	0.0693764	DOWN
2510009E07Rik	-0.553233	0.00417058	0.0694747	DOWN
Tmem80	-0.494025	0.00417939	0.0695341	DOWN
Cacng6	-0.71279	0.00420325	0.0698435	DOWN
Rrp12	0.649218	0.00421284	0.0699152	UP
Ddi2	0.476241	0.00423019	0.0700394	UP
Timmdc1	-0.3474	0.00423089	0.0700394	DOWN
Il1rn	3.72804	0.00426096	0.0703689	UP
Ap3m2	-0.998453	0.0042614	0.0703689	DOWN
Bap1	-0.290842	0.00426947	0.0704144	DOWN
Mrpl49	-0.468717	0.00429937	0.0708111	DOWN
Rnf150	-0.700243	0.0043042	0.0708111	DOWN
Btg2	1.24421	0.00431337	0.0708472	UP
Rwdd3	-1.74175	0.00431708	0.0708472	DOWN
Vkorc1	-0.716313	0.00433698	0.0710857	DOWN
Nacc2	-0.561989	0.00436038	0.0713811	DOWN
Fnbp1	-0.457527	0.00438108	0.0716228	DOWN
Ccdc8	-0.807193	0.00438595	0.0716228	DOWN
Bola1	-0.769103	0.00440002	0.071728	DOWN
Ate1	-0.311443	0.00440404	0.071728	DOWN
Actr6	-0.713609	0.00441157	0.071728	DOWN
Btbd8	-0.889354	0.00441712	0.071728	DOWN
Ier2	1.03763	0.00441944	0.071728	UP
Col22a1	-0.702877	0.00443583	0.071906	DOWN
Trim63	1.19338	0.00444408	0.0719518	UP
Slc22a23	0.750734	0.00446687	0.0722325	UP
Sesn1	1.05898	0.0044766	0.0723017	UP
Ncaph2	-0.403176	0.00449232	0.0724195	DOWN
Apln	2.06718	0.00449742	0.0724195	UP
Mpi	-0.451369	0.00450552	0.0724195	DOWN
Zbtb11	0.687857	0.00450574	0.0724195	UP
Adss	0.495294	0.00452064	0.072569	UP
G3bp1	0.337509	0.00452941	0.072569	UP
Dnajc1	-0.353753	0.00453145	0.072569	DOWN
Bst1	2.22765	0.00455642	0.0728807	UP
Rhbdl1	-1.817	0.00457778	0.0731342	DOWN
Tmc7	-1.06733	0.00458846	0.0732165	DOWN
Ciao2b	-0.606951	0.00459926	0.0733006	DOWN
Pknox2	-0.419263	0.00467927	0.0743564	DOWN
Tab1	-0.422664	0.00468199	0.0743564	DOWN
Tada2b	0.423301	0.00468339	0.0743564	UP
Junb	1.07572	0.00469442	0.0743564	UP
Sema4a	3.87229	0.00469846	0.0743564	UP
Tacc2	0.934824	0.00470149	0.0743564	UP
Parvg	2.01599	0.00470475	0.0743564	UP
Fem1a	-0.297665	0.00471957	0.0744424	DOWN
Rprd2	0.348464	0.00472142	0.0744424	UP
Sspn	-0.410248	0.00474399	0.0747094	DOWN
Hprt	0.441797	0.00476722	0.0749802	UP
Bfar	0.492547	0.0047727	0.0749802	UP
Mafk	0.7845	0.00477815	0.0749802	UP
Ric8b	-0.598635	0.00479134	0.0750983	DOWN
Steap3	-0.737599	0.00479974	0.0750984	DOWN
Nus1	0.410751	0.00480267	0.0750984	UP
Mov10	-1.09129	0.00483979	0.0755896	DOWN
Pdcd11	0.480744	0.0048609	0.075804	UP
Ccr2	1.55325	0.00486494	0.075804	UP
Lrsam1	-0.655517	0.00487376	0.0758522	DOWN
Esf1	0.466526	0.00488648	0.075961	UP
Mup18	-5.84426	0.00489937	0.0760277	DOWN
Timm8a1	0.642027	0.00490224	0.0760277	UP
Dstn	0.455595	0.00491054	0.0760655	UP
Mllt11	-0.4779	0.00491615	0.0760655	DOWN
Cap1	0.364381	0.00493603	0.0762778	UP
Vmn1r229	-1.20767	0.00494138	0.0762778	DOWN
Wrb	-0.683617	0.00495283	0.0763657	DOWN
Pltp	-0.885614	0.00498363	0.0767514	DOWN
Slc45a4	-0.414608	0.00499006	0.0767612	DOWN
Hnrnpa0	0.439162	0.00500359	0.0768801	UP
Tmem25	-1.15365	0.005026	0.0771238	DOWN
Parp1	-0.461123	0.00503593	0.0771238	DOWN
2610044O15Rik8	-0.532103	0.00503786	0.0771238	DOWN
Lats1	0.44054	0.00504271	0.0771238	UP
Bcl2l12	-0.934191	0.00504906	0.0771319	DOWN
Plod2	0.960901	0.0050846	0.0775856	UP
Sars2	-0.504574	0.00509685	0.077683	DOWN
Nr4a3	2.35212	0.00511688	0.0778851	UP
Tet1	-1.49034	0.00512186	0.0778851	DOWN
Syn2	1.62304	0.00513893	0.0780409	UP
Popdc3	0.416788	0.00514387	0.0780409	UP
Pcyt2	-0.518675	0.0051544	0.0781112	DOWN
Akap6	-0.481219	0.00516866	0.0782379	DOWN
Tex30	0.687107	0.00518933	0.0784612	UP
Fam219b	-0.390805	0.0052098	0.078681	DOWN
Mettl17	-1.49668	0.0052287	0.0787981	DOWN
Gbf1	-0.492679	0.00522944	0.0787981	DOWN
Col14a1	-1.2865	0.00523706	0.0788234	DOWN
Slc46a1	-1.85304	0.00524519	0.0788563	DOWN
Eea1	0.381625	0.00525365	0.078894	UP
Tomm70a	0.482446	0.00526261	0.0789391	UP
Ccl12	4.4431	0.0052789	0.0790941	UP
Ska2	-0.640478	0.00530801	0.0794404	DOWN
Diablo	-0.273538	0.00531486	0.0794533	DOWN
Nqo1	-0.717728	0.00533962	0.0796245	DOWN
Sh3rf1	0.928318	0.00534348	0.0796245	UP
Eif3j1	0.231471	0.00535313	0.0796245	UP
AI606181	0.614928	0.0053543	0.0796245	UP
Cyp1b1	1.28545	0.00535634	0.0796245	UP
Akap12	2.35232	0.00536716	0.0796905	UP
Ms4a6d	1.58665	0.00537728	0.0796905	UP
Nup153	0.39186	0.00538055	0.0796905	UP
Synj2	0.96844	0.00538482	0.0796905	UP
Prox2	-1.30069	0.00539227	0.0796955	DOWN
Bin1	-0.334621	0.00539718	0.0796955	DOWN
Fhad1	2.46968	0.00541815	0.0799162	UP
Llph	0.521814	0.00547787	0.0806498	UP
Igsf6	1.65544	0.00548005	0.0806498	UP
Hdac2	-0.272105	0.00548786	0.0806751	DOWN
Serinc3	0.465685	0.0055246	0.0811254	UP
Apoc2	3.2271	0.005541	0.0811449	UP
Tubg1	-0.513835	0.00554374	0.0811449	DOWN
Furin	0.383667	0.00554429	0.0811449	UP
Mcph1	-0.750355	0.00558899	0.0815495	DOWN
Fbxo4	0.661267	0.00558903	0.0815495	UP
Pcf11	0.449773	0.00559725	0.0815495	UP
Nop14	0.412812	0.00560084	0.0815495	UP
Ppil4	0.382274	0.00560268	0.0815495	UP
Cry2	0.714748	0.00561094	0.0815801	UP
Tmem177	-0.575654	0.00561735	0.0815839	DOWN
Osm	3.6954	0.00562799		UP
Ift80	-0.998009	0.00565151	0.0819902	DOWN
Sdr39u1	-0.478131	0.00566022	0.0820268	DOWN
Rapsn	-0.69701	0.00568948	0.0822928	DOWN
Ptcd2	-0.464169	0.00569922	0.0822928	DOWN
Ankrd24	-1.03914	0.00570132	0.0822928	DOWN
Scn4b	-0.633448	0.00570694	0.0822928	DOWN
Akap8	0.354037	0.00570961	0.0822928	UP
Aasdh	-0.844911	0.0057186	0.0823329	DOWN
Larp4b	-0.376114	0.00574527	0.0825824	DOWN
Zmat1	-1.12389	0.00574838	0.0825824	DOWN
Pak2	0.332327	0.00579208	0.0830058	UP
Zdhhc13	0.653518	0.00579374	0.0830058	UP
Asb15	-1.18314	0.00579975	0.0830058	DOWN
Aqp8	-3.49204	0.00580289	0.0830058	DOWN
Jarid2	-0.421899	0.00585463	0.0836209	DOWN
D5Ertd579e	-0.378018	0.00586236	0.0836209	DOWN
Oasl1	2.17743	0.00586677	0.0836209	UP
Ptgr2	-0.528409	0.00587112	0.0836209	DOWN
Hk2	-0.591789	0.00589111	0.0837744	DOWN
Tmem41b	0.626307	0.00589453	0.0837744	UP
Cd300lf	2.19976	0.00591592	0.0839884	UP
Schip1	-0.670385	0.00593229	0.0841306	DOWN
Sugt1	-0.291002	0.00594742	0.0842265	DOWN
Pigh	-1.05863	0.00595223	0.0842265	DOWN
Ubl7	-0.322062	0.00595811	0.0842265	DOWN
Grtp1	-1.12365	0.00598831	0.0845007	DOWN
Ppox	-0.622057	0.0060012	0.0845007	DOWN
Atg9a	-0.344128	0.00600694	0.0845007	DOWN
Vps54	0.341295	0.00600906	0.0845007	UP
Ddx50	0.371939	0.00600937	0.0845007	UP
Srsf6	0.564491	0.00603756	0.0848073	UP
Rcan1	0.869136	0.00604454	0.0848155	UP
BC024063	-1.90396	0.00605771	0.0849105	DOWN
Gadl1	0.576245	0.00606699	0.0849487	UP
Cenpl	4.53299	0.00607628	0.0849487	UP
Tmco3	-0.548203	0.00607966	0.0849487	DOWN
Slc22a4	1.03889	0.00610598	0.0852267	UP
Fam160b2	-0.375217	0.00613531	0.085546	DOWN
Stat5b	-0.486581	0.00617484	0.0859369	DOWN
Zfp991	1.8512	0.00617631	0.0859369	UP
Galnt17	-0.725751	0.00623335	0.0866396	DOWN
Utp15	0.516578	0.00625166	0.0868031	UP
Ano4	-1.25553	0.00627843	0.0870836	DOWN
Tpcn1	-0.47729	0.00628775	0.0871104	DOWN
Atp8b1	0.881669	0.0062935	0.0871104	UP
Chpf2	0.599027	0.00633929	0.0876527	UP
Taf7	0.61843	0.00635384	0.0877624	UP
Taf5	0.630053	0.00644444	0.0889211	UP
Rsbn1l	0.400232	0.00645546	0.0889807	UP
Fosl2	0.861599	0.00647215	0.0891181	UP
Itch	0.364687	0.00650849	0.0895255	UP
Necap1	0.337195	0.00653052	0.0897354	UP
Dhrs9	2.53042	0.00656335	0.0900094	UP
Rabl6	-0.381863	0.00656529	0.0900094	DOWN
D2hgdh	-0.547446	0.00657619	0.0900094	DOWN
D17H6S53E	-0.451412	0.00657897	0.0900094	DOWN
Orc2	0.29444	0.00659027	0.0900094	UP
Plp1	0.920519	0.00659383	0.0900094	UP
Lamc2	1.47657	0.00659797	0.0900094	UP
Slc30a6	-1.47655	0.00665011	0.0903159	DOWN
Ankrd50	0.444827	0.00665321	0.0903159	UP
Sec63	0.289306	0.00665465	0.0903159	UP
Myg1	-0.80932	0.00666212	0.0903159	DOWN
2810006K23Rik	-0.681708	0.00666709	0.0903159	DOWN
Scnm1	-0.480482	0.00666837	0.0903159	DOWN
Topors	0.384048	0.00666866	0.0903159	UP
Map3k8	2.08717	0.00667493	0.0903159	UP
Abhd14a	-0.516625	0.0067115	0.0905108	DOWN
Jmjd1c	0.900353	0.00671422	0.0905108	UP
Wdcp	-0.728478	0.00671605	0.0905108	DOWN
Itgam	1.44043	0.00671986	0.0905108	UP
Nfib	-0.311765	0.0067272	0.0905108	DOWN
Cdk9	0.371789	0.00673029	0.0905108	UP
Ift172	-0.385907	0.00674681	0.090641	DOWN
Kera	-2.15582	0.0067996	0.0912578	DOWN
Poll	-0.486221	0.00681568	0.0913812	DOWN
Ly6c2	3.71864	0.00684826		UP
Rnf5	-0.522424	0.00688327	0.0921942	DOWN
Mtr	-0.395679	0.00690094	0.0923375	DOWN
Mrgprb1	3.64833	0.0069187		UP
Cep85	-0.405423	0.00691994	0.0924984	DOWN
Myh9	0.563519	0.0069313	0.092557	UP
Nr2c2ap	0.816287	0.00696477	0.0929103	UP
Cep192	2.13711	0.0069826	0.0930545	UP
Bnc2	1.77587	0.00699567	0.0931351	UP
Aagab	-0.440583	0.00706339	0.0938964	DOWN
Terf2	0.390321	0.00706702	0.0938964	UP
Armcx4	-0.782111	0.00707578	0.0939188	DOWN
Asap1	0.599593	0.00709511	0.0940811	UP
Rap1gds1	-0.292659	0.00711131	0.094107	DOWN
Slc35e4	0.897868	0.00711529	0.094107	UP
Atxn2	-0.35753	0.00712824	0.094107	DOWN
Cyb5r4	-0.294188	0.00713232	0.094107	DOWN
Ccr5	1.69955	0.00713255	0.094107	UP
Atg13	0.393994	0.00715371	0.0941452	UP
Id1	1.11047	0.00715818	0.0941452	UP
Rpl39	0.323355	0.00716607	0.0941452	UP
Slc16a2	-0.567838	0.00716933	0.0941452	DOWN
Dcp1a	0.646557	0.00717094	0.0941452	UP
Wnt5a	-0.707673	0.00721455	0.0946241	DOWN
Rsbn1	0.469812	0.00727081	0.0952677	UP
Ptprs	-1.17311	0.00732118	0.0958275	DOWN
Tgif1	1.24552	0.00733731	0.0958275	UP
Cbr1	-0.615446	0.00734036	0.0958275	DOWN
Il2ra	-1.62973	0.00734244	0.0958275	DOWN
Eif3e	0.329947	0.00736738	0.0959903	UP
Ssbp2	-0.473971	0.007383	0.0959903	DOWN
Socs6	0.363017	0.00739493	0.0959903	UP
Col6a6	-1.93311	0.0074029	0.0959903	DOWN
H13	0.44195	0.00740337	0.0959903	UP
B230307C23Rik	1.05058	0.00740721	0.0959903	UP
Dtna	-0.379669	0.00741225	0.0959903	DOWN
Klf12	-0.746923	0.00741282	0.0959903	DOWN
Arhgef6	-0.932186	0.00743324	0.0961608	DOWN
Dusp2	1.91072	0.0074575		UP
Ranbp2	0.29108	0.00748717	0.0967245	UP
Plekha8	0.495887	0.0074914	0.0967245	UP
Srsf2	0.512418	0.00750816	0.0968464	UP
Prkra	-0.65677	0.0075245	0.0969629	DOWN
Spaca6	3.62939	0.00754042		UP
Ppm1d	0.456397	0.00758699	0.0976733	UP
Naca	0.297956	0.00761401	0.0978117	UP
Snx32	-0.832659	0.00763323	0.0978117	DOWN
Trmt5	-0.614672	0.00764386	0.0978117	DOWN
Senp6	0.403895	0.00764507	0.0978117	UP
Ahsa2	-0.353679	0.00764582	0.0978117	DOWN
Hivep3	1.11502	0.00764697	0.0978117	UP
Fam207a	0.391087	0.00764938	0.0978117	UP
Nmrk1	-1.04194	0.00766399	0.0978477	DOWN
Msl3	-0.364679	0.00766695	0.0978477	DOWN
Ror1	1.20031	0.00770239	0.0982055	UP
Slc25a24	1.14648	0.00779738	0.0993211	UP
Tmem175	-0.420348	0.00782473	0.0995216	DOWN
Txndc15	-0.334189	0.00782813	0.0995216	DOWN
Def8	-0.452184	0.00787847	0.100066	DOWN
Tigd2	0.418385	0.00789627	0.100128	UP
Sult1e1	-3.70204	0.0078985	0.100128	DOWN
Foxp1	0.552634	0.00791385	0.100227	UP
Cdc42ep2	-0.88316	0.00796072	0.100724	DOWN
Tmem81	0.881568	0.00800444	0.101071	UP
Dynlt1b	-0.342997	0.00800642	0.101071	DOWN
Gpx7	-0.774706	0.008011	0.101071	DOWN
Rpl9	0.327068	0.00802369	0.101073	UP
Wdr83os	-0.439364	0.00803146	0.101073	DOWN
Dag1	-0.291691	0.00803399	0.101073	DOWN
Rpa1	-0.368567	0.0080518	0.101201	DOWN
Nudt9	-0.265975	0.00807016	0.101335	DOWN
Mkks	-0.533714	0.00808739	0.101456	DOWN
Mtfp1	-0.602389	0.00812991	0.101893	DOWN
Klhdc8a	1.78439	0.0081546	0.101949	UP
Armcx5	0.623497	0.00815493	0.101949	UP
Cntf	1.31135	0.00815746	0.101949	UP
Dyx1c1	-1.5255	0.00817652	0.102091	DOWN
Stc1	1.30834	0.00819936	0.102131	UP
Ppp2r5b	-0.51248	0.00820174	0.102131	DOWN
Tigar	-0.453746	0.00820961	0.102131	DOWN
Nnat	-1.49052	0.00821642	0.102131	DOWN
St3gal5	0.823215	0.00821821	0.102131	UP
Clock	0.600737	0.00823669	0.102265	UP
Stard3nl	0.531925	0.00825587	0.102407	UP
Trmt6	0.561427	0.00827864	0.102593	UP
Klc2	-0.393828	0.00829085	0.102649	DOWN
Fndc1	-1.25427	0.00830373	0.102712	DOWN
Cuta	-0.487245	0.00835918	0.103302	DOWN
Olfr11	3.12154	0.00839945		UP
Adssl1	-0.336042	0.00840453	0.103765	DOWN
Ubxn8	0.476097	0.00844114	0.104121	UP
Pik3r4	-0.452819	0.00845652	0.104213	DOWN
Usp38	0.455129	0.00847255	0.104314	UP
Arrdc4	0.62693	0.00848067	0.104317	UP
Plod1	-0.503639	0.00850231	0.104395	DOWN
Abhd13	0.366148	0.00850272	0.104395	UP
Siae	-0.657865	0.0085167	0.104469	DOWN
Hs3st5	-1.0928	0.00852599	0.104487	DOWN
Smim27	-0.547456	0.00857176	0.104951	DOWN
Zfp39	-0.563172	0.00859158	0.105096	DOWN
Utp3	0.28136	0.00861693	0.105309	UP
Dnaja3	-0.312181	0.00865846	0.105592	DOWN
Rfx5	-3.06789	0.00866026	0.105592	DOWN
Lcorl	0.646827	0.00866398	0.105592	UP
Mob1a	0.368128	0.00868063	0.105698	UP
Tecrl	1.00024	0.00869173	0.105736	UP
Rbm4	0.548913	0.00870502	0.105792	UP
Iba57	0.489778	0.0087123	0.105792	UP
Dse	1.04609	0.00873511	0.105972	UP
Icmt	-0.699305	0.00876337	0.106168	DOWN
Coa6	-0.591793	0.00876729	0.106168	DOWN
Cyp4f13	-0.972745	0.00881818	0.106687	DOWN
Hsf1	-0.477516	0.00882687	0.106694	DOWN
Coq5	-0.382323	0.00883487	0.106694	DOWN
2310057M21Rik	0.833203	0.0088952	0.107325	UP
Tra2b	0.484195	0.00891483	0.107384	UP
Pwp1	0.327765	0.0089163	0.107384	UP
Tlr4	0.896965	0.00895113	0.107706	UP
Neil1	-0.580182	0.00896424	0.107766	DOWN
Bcl2l1	1.0666	0.00899248	0.108007	UP
Amacr	-0.599533	0.00902376	0.108285	DOWN
Gab2	0.830372	0.00904188	0.108404	UP
Ormdl1	-0.778691	0.00906272	0.108526	DOWN
Prr22	-3.47442	0.0090632		DOWN
Pitpnm2	-0.520122	0.00906835	0.108526	DOWN
Zcchc2	0.462489	0.00909296	0.108648	UP
Plekhg1	1.21568	0.00909498	0.108648	UP
Nat9	-0.495806	0.00910623	0.108685	DOWN
Enah	1.14679	0.00912928	0.108862	UP
Abca5	0.560758	0.00915516	0.109072	UP
Lcn2	2.38951	0.00920711	0.109593	UP
Hspa8	0.531455	0.00922115	0.109661	UP
Tmem254a	-3.32111	0.0092532	0.109944	DOWN
Akap17b	-0.932591	0.00927894	0.110151	DOWN
Ints10	-0.60179	0.0093147	0.110477	DOWN
Popdc2	0.597252	0.00934239	0.110706	UP
Nipal1	3.36779	0.00935761	0.110787	UP
Aaed1	-0.421165	0.00938861	0.110948	DOWN
Cpeb4	0.62332	0.00939332	0.110948	UP
Hfe2	-0.405535	0.00939624	0.110948	DOWN
Rad17	0.427656	0.00942483	0.111186	UP
Taz	-0.437271	0.0094359	0.111218	DOWN
Pex10	-0.481264	0.00947146	0.111538	DOWN
Bcat1	1.84064	0.00948316	0.111577	UP
Zfp951	0.864057	0.00949287	0.111592	UP
Hdhd3	-1.40126	0.00950926	0.111685	DOWN
Chmp4c	1.50452	0.00958487	0.112474	UP
Dhx9	0.335448	0.00960372	0.112595	UP
Nrip3	2.34881	0.00961861		UP
Mybph	1.28768	0.00964734	0.112882	UP
Epn1	-0.287037	0.00965227	0.112882	DOWN
Peg3	1.10413	0.00965374	0.112882	UP
Sec23a	-0.258208	0.00968722	0.113174	DOWN
Zbtb10	0.425847	0.00972365	0.1135	UP
Exo1	3.34016	0.00974174		UP
Sox9	1.9005	0.00974593	0.11366	UP
Litaf	0.940599	0.00976149	0.113741	UP
Mtmr1	0.327585	0.00981424	0.114255	UP
Dmp1	2.86787	0.00982884		UP
Rnf2	0.463722	0.00986136	0.114572	UP
Trim12c	-0.597155	0.00986172	0.114572	DOWN
Zfp619	0.755462	0.00986733	0.114572	UP
Nmd3	0.54308	0.00990685	0.114865	UP
Serpinb8	0.813135	0.00991531	0.114865	UP
Slc35a3	0.487538	0.00991903	0.114865	UP
Klf2	0.956224	0.00992729	0.114865	UP
Smco1	-1.2496	0.00993758	0.114884	DOWN
Mospd3	-0.550977	0.010107	0.116606	DOWN
Aup1	4.47206	0.0101216	0.116606	UP
Vps16	-0.346409	0.010126	0.116606	DOWN
Pus1	0.521262	0.0101285	0.116606	UP
Gabbr2	-3.13958	0.0101305	0.116606	DOWN
4632433K11Rik	4.40468	0.0101388		UP
Gm10604	-1.65193	0.0101729		DOWN
Lonrf3	2.15423	0.0101996	0.117279	UP
Lpcat3	0.478753	0.0102066	0.117279	UP
Tnfrsf1a	0.45592	0.0102288	0.117368	UP
Ppp1r12a	0.40925	0.0102323	0.117368	UP
Atp9a	-0.494621	0.0102409	0.117368	DOWN
Kif3c	-0.59646	0.0102854	0.117634	DOWN
Kctd9	0.725619	0.0102897	0.117634	UP
Gal3st2c	-1.72832	0.0102907	0.117634	DOWN
Fzd5	0.740267	0.010302	0.117662	UP
Ldlrad3	0.706685	0.0103153	0.117712	UP
Dmwd	-0.614922	0.0104159	0.118757	DOWN
Tpgs1	-0.727319	0.0104777	0.11936	DOWN
Noct	0.495045	0.0105172	0.119706	UP
Pdcd10	0.476348	0.0105303	0.119753	UP
Sema6c	-1.15674	0.0105465	0.119814	DOWN
Tmem109	-0.524339	0.0105537	0.119814	DOWN
Akap11	0.419744	0.0105917	0.11999	UP
Csrp3	0.67334	0.0105959	0.11999	UP
Mvb12b	-0.409509	0.0106152	0.11999	DOWN
Trappc6a	-0.825837	0.0106153	0.11999	DOWN
Pkp4	0.59237	0.0106211	0.11999	UP
Supt16	0.31711	0.0106249	0.11999	UP
Wdr92	-0.494313	0.0106326	0.11999	DOWN
Srpk2	0.611407	0.0106553	0.120144	UP
Coch	-1.48246	0.0106723		DOWN
Vcpip1	0.344847	0.0106737	0.120249	UP
Sh2d5	3.75292	0.0106935	0.12037	UP
Otud4	0.330284	0.0107158	0.120519	UP
Cxcl1	2.86276	0.0107424	0.120714	UP
Epha2	1.17394	0.0107514	0.120714	UP
Ruvbl2	-0.47687	0.0107812	0.120947	DOWN
Ncl	0.443338	0.0108298	0.121389	UP
Crk	0.310674	0.010902	0.121924	UP
Tle4	0.542472	0.0109041	0.121924	UP
Rgs10	-1.1112	0.0109051	0.121924	DOWN
Isoc2b	-0.865035	0.0109621	0.122458	DOWN
Rab11b	0.365167	0.0109793	0.122547	UP
Gabpa	0.311018	0.0110088	0.122772	UP
Pla2g4e	0.555795	0.0110769	0.123239	UP
Agpat3	0.339142	0.0110931	0.123239	UP
Nphp1	-0.400866	0.0110954	0.123239	DOWN
Mctp1	1.30146	0.0110963	0.123239	UP
Ddo	-0.622636	0.0111037	0.123239	DOWN
Naaa	-0.864417	0.0111095	0.123239	DOWN
Rbm34	0.462217	0.0111157	0.123239	UP
Rrp8	0.430383	0.0111776	0.123821	UP
Twf2	0.457286	0.0111885	0.123839	UP
Strip1	-0.339249	0.011208	0.123952	DOWN
Rogdi	-0.611135	0.0112628	0.124422	DOWN
Anapc16	0.376434	0.0112713	0.124422	UP
Chd7	0.633617	0.0112948	0.124422	UP
Unc119b	0.620632	0.0112948	0.124422	UP
Fam234a	-0.374545	0.0112974	0.124422	DOWN
Esd	0.333134	0.0113087	0.124442	UP
Mea1	-0.35927	0.0113538	0.124637	DOWN
Phc3	0.43433	0.0113589	0.124637	UP
Mrps16	-0.568387	0.011364	0.124637	DOWN
Haus8	-0.770309	0.0113839	0.124637	DOWN
Hmgcs2	1.12499	0.0113844	0.124637	UP
Ssbp3	-0.562233	0.0113845	0.124637	DOWN
Fjx1	1.46421	0.0113922	0.124637	UP
Smad3	-0.810877	0.0114398	0.125055	DOWN
Dhx15	0.320849	0.0114941	0.125501	UP
Tor1b	-0.740118	0.0114995	0.125501	DOWN
Cpne8	1.40577	0.0115723	0.126191	UP
Rnf187	-0.301175	0.0115975	0.126362	DOWN
Pfkfb1	-0.872786	0.011633	0.126645	DOWN
Cdk17	0.644625	0.0116688	0.12693	UP
Mga	0.453492	0.0116913	0.127071	UP
Pi16	-1.14099	0.0117154	0.12714	DOWN
Pofut1	-0.330474	0.0117168	0.12714	DOWN
Ndrg3	-0.443017	0.0117423	0.127301	DOWN
Mmp23	-1.55739	0.0117509	0.127301	DOWN
Slc37a4	-0.718363	0.0118612	0.128243	DOWN
Rgs6	-1.92248	0.0118666	0.128243	DOWN
Lage3	-0.481953	0.0118711	0.128243	DOWN
Pik3ca	0.371858	0.0118765	0.128243	UP
Kcnu1	-3.64643	0.0118787		DOWN
Arhgap22	2.21364	0.0118891	0.12826	UP
Mrto4	0.405388	0.0118974	0.12826	UP
Brpf1	0.511043	0.0119194	0.128392	UP
Fmr1	0.550021	0.0119599	0.128724	UP
Sfmbt1	0.340758	0.0119933	0.128979	UP
Tmem86b	-0.942744	0.0120695	0.129693	DOWN
Parm1	-0.868421	0.0121038	0.129957	DOWN
Ctdsp1	-0.329388	0.0121753	0.130619	DOWN
Rbck1	-0.37174	0.012197	0.130746	DOWN
Snapc2	-0.528468	0.0122378	0.131048	DOWN
9530068E07Rik	0.252501	0.0122512	0.131048	UP
Atxn1l	0.338148	0.0122623	0.131048	UP
Dnajb4	0.533316	0.0122649	0.131048	UP
Lamtor2	-0.374416	0.0122746	0.131048	DOWN
Trip4	0.271284	0.0123064	0.131281	UP
Rest	0.509496	0.012321	0.131331	UP
Frrs1	0.567247	0.012358	0.13162	UP
Snx13	0.340512	0.0124113	0.132082	UP
Prune2	-0.871791	0.0124364	0.132243	DOWN
H2afv	-0.385592	0.0124478	0.132258	DOWN
Lynx1	-0.40338	0.0125163	0.132879	DOWN
Kmo	3.08292	0.0125352	0.132973	UP
Bend3	0.50255	0.0125546	0.133073	UP
Eif4g3	0.400861	0.0125731	0.133162	UP
Ogfod1	-0.286544	0.0125974	0.133244	DOWN
Smpx	0.350145	0.0126025	0.133244	UP
Ahcyl1	0.576131	0.0126109	0.133244	UP
R3hdm4	-0.254216	0.0126355	0.133397	DOWN
Pbrm1	0.270663	0.0126673	0.133627	UP
Cdk5r1	1.65989	0.0126971	0.133834	UP
Mgat1	-0.292965	0.0127168	0.133936	DOWN
Pmf1	-0.570033	0.0127336	0.134006	DOWN
Eif2s1	0.260776	0.012744	0.134009	UP
Pgam5	0.26005	0.0127617	0.134026	UP
Camk1	-0.568135	0.0127658	0.134026	DOWN
Angptl2	-0.915696	0.0127804	0.134073	DOWN
Ubac1	-0.486672	0.0128203	0.134385	DOWN
Cp	0.530162	0.0128419	0.134412	UP
Pank4	-0.470778	0.0128595	0.134412	DOWN
Commd3	-0.31921	0.0128633	0.134412	DOWN
Abl2	0.501352	0.0128634	0.134412	UP
Snapc1	-0.496611	0.0129018	0.134707	DOWN
Mecp2	0.344974	0.0129427	0.135027	UP
Trappc4	-0.719815	0.0129834	0.135346	DOWN
Ghdc	-0.460451	0.0130018	0.135412	DOWN
E2f4	0.398626	0.0130102	0.135412	UP
Pradc1	-0.706813	0.0130357	0.135571	DOWN
Myf6	0.95055	0.0130762	0.135885	UP
Rps6ka5	-0.752504	0.0131442	0.136486	DOWN
Zcchc17	-0.392199	0.0131581	0.136523	DOWN
Ctu2	0.513302	0.0132261	0.137082	UP
Cmip	0.582341	0.0132326	0.137082	UP
Sprtn	0.449941	0.0132905	0.137547	UP
Erc2	4.27018	0.0132983	0.137547	UP
Tars2	-0.317012	0.0133189	0.137548	DOWN
Cep104	-0.255373	0.0133191	0.137548	DOWN
Lims1	-0.351276	0.0133404	0.13766	DOWN
Iws1	0.348296	0.0133984	0.138152	UP
Slfn4	1.69491	0.0134467	0.138541	UP
Sumf2	-1.18142	0.0134757	0.138732	DOWN
1700021F05Rik	-0.383129	0.0135075	0.138762	DOWN
Sec11a	0.504012	0.0135076	0.138762	UP
Mypop	-0.991523	0.0135117	0.138762	DOWN
Trim7	-1.22544	0.0135234	0.138762	DOWN
1190005I06Rik	-1.87352	0.0135572	0.138762	DOWN
Polr1e	0.712924	0.0135622	0.138762	UP
Alpk3	-0.338815	0.0135623	0.138762	DOWN
Psmd8	0.378401	0.0135683	0.138762	UP
Ywhah	0.281843	0.0135796	0.138762	UP
Cwc22	0.531988	0.0135832	0.138762	UP
Vps45	-0.533603	0.0135962	0.138788	DOWN
Il15	-1.04832	0.0136218	0.138942	DOWN
Pak1ip1	0.334295	0.0136497	0.139102	UP
Bhlhb9	0.788366	0.0136743	0.139102	UP
Cog6	-0.369294	0.0136871	0.139102	DOWN
2700049A03Rik	-0.605706	0.0136909	0.139102	DOWN
Cmas	-0.264249	0.0136978	0.139102	DOWN
Farp1	0.759696	0.0137004	0.139102	UP
Syt11	-0.504974	0.013721	0.139205	DOWN
Fubp1	0.547533	0.0137687	0.139424	UP
Usp5	-0.331218	0.013774	0.139424	DOWN
Crebzf	0.680739	0.013776	0.139424	UP
Gm14399	-1.13344	0.0137846	0.139424	DOWN
Rsrc2	0.409448	0.0138264	0.13974	UP
Glt8d2	-1.84539	0.0138537	0.139909	DOWN
Fcer1g	0.9306	0.0139347	0.140619	UP
Pacs1	-0.402606	0.0140451	0.141388	DOWN
Ccng1	-0.360335	0.0140473	0.141388	DOWN
Ano8	-0.700241	0.0140615	0.141388	DOWN
Trappc2	-0.445967	0.0140617	0.141388	DOWN
Arhgap18	-0.948204	0.0140642	0.141388	DOWN
Ppp1r16a	-0.586589	0.0140799	0.141432	DOWN
Pafah1b1	0.193857	0.0140899	0.141432	UP
Atl3	0.503875	0.0141604	0.142024	UP
Ppid	-0.416845	0.0141703	0.142024	DOWN
Ddx52	0.264454	0.0141957	0.142062	UP
Pomt1	-0.999096	0.0142057	0.142062	DOWN
Trim55	-0.34626	0.0142062	0.142062	DOWN
Ttc37	0.531426	0.0142241	0.142134	UP
Cebpd	1.05201	0.0142423	0.142209	UP
Mfsd11	-0.671347	0.0142723	0.1424	DOWN
Gm3558	3.83494	0.0142883		UP
Ksr1	-0.721043	0.0143524	0.143092	DOWN
Sardh	-1.15249	0.0143737	0.143197	DOWN
Atp11c	0.635778	0.0144023	0.143197	UP
Zfp14	-0.793751	0.0144042	0.143197	DOWN
1600014C10Rik	-0.644211	0.014406	0.143197	DOWN
Col11a2	-1.06111	0.014466	0.143588	DOWN
Tmx1	0.394255	0.014467	0.143588	UP
Cldnd1	0.38365	0.0144906	0.143617	UP
Zfp772	-0.548558	0.0144995	0.143617	DOWN
Eif3g	0.299805	0.0145026	0.143617	UP
Trove2	0.440566	0.0145816	0.144293	UP
Ccdc130	-0.718652	0.0146377	0.144739	DOWN
Serac1	-0.616992	0.0147327	0.145529	DOWN
Foxn2	0.368524	0.0147395	0.145529	UP
Habp2	0.558783	0.0147581	0.145605	UP
Cpeb3	-0.334321	0.0147954	0.145606	DOWN
Naa15	0.238193	0.0148172	0.145606	UP
Kpna1	0.251753	0.0148174	0.145606	UP
Atf1	0.311767	0.0148399	0.145606	UP
Senp8	-0.863453	0.014841	0.145606	DOWN
Tcea1	0.278722	0.0148465	0.145606	UP
Rrs1	0.498329	0.0148627	0.145606	UP
Pde7b	-0.75034	0.0148682	0.145606	DOWN
Rps24	0.273832	0.0148726	0.145606	UP
Hectd3	-0.31935	0.0148756	0.145606	DOWN
Mtfmt	-0.594825	0.0148793	0.145606	DOWN
Ints9	-0.379987	0.0148966	0.145606	DOWN
Asb2	-1.13534	0.014901	0.145606	DOWN
Cfh	0.75525	0.0149466	0.145944	UP
Tmem248	0.369345	0.0149887	0.14619	UP
Arfgap3	0.63472	0.0149938	0.14619	UP
Csnk1g3	0.329473	0.0150214	0.146351	UP
Wrap53	-0.648329	0.0150744	0.146716	DOWN
Kdsr	0.477593	0.015084	0.146716	UP
Ache	-0.954714	0.0151004	0.146716	DOWN
Alg9	-0.941964	0.0151124	0.146716	DOWN
Osbpl8	0.422187	0.0151169	0.146716	UP
Trim29	-3.57307	0.0151273	0.146716	DOWN
Olfr906	-3.3951	0.0151399		DOWN
Paqr8	0.837972	0.0151472	0.146716	UP
Heatr5a	-0.485809	0.0151474	0.146716	DOWN
Zfp454	-1.60786	0.0152183		DOWN
Tti1	-0.351018	0.0152204	0.147278	DOWN
Hipk4	-1.073	0.0152359	0.147278	DOWN
Plekha1	0.579947	0.0152444	0.147278	UP
Mxra7	-0.713102	0.0152498	0.147278	DOWN
Dhrs7	-0.520714	0.0153006	0.147661	DOWN
Tuba1b	0.752765	0.015336	0.14777	UP
Slc35g2	-0.867975	0.0153431	0.14777	DOWN
Msh2	-0.495864	0.0153454	0.14777	DOWN
Olfr1173	-0.777729	0.015402	0.148208	DOWN
Adamtsl4	-0.701345	0.0154287	0.148357	DOWN
Lrrc45	-0.9986	0.0154729	0.148675	DOWN
Ube2w	0.445671	0.0155016	0.14878	UP
Nufip2	0.367737	0.015511	0.14878	UP
Wdyhv1	-0.562103	0.0155258	0.14878	DOWN
Zfp658	-1.4216	0.0155288	0.14878	DOWN
Tmem220	-0.863771	0.0155643	0.149013	DOWN
Picalm	0.605106	0.015617	0.149409	UP
Blm	1.45199	0.0157761	0.150786	UP
Mdn1	0.762797	0.0157837	0.150786	UP
Fam118b	-0.546017	0.0158241	0.151064	DOWN
Mapk1ip1l	0.280623	0.015852	0.151222	UP
Ppp4r2	0.365692	0.0158997	0.151409	UP
Cdk10	-0.448156	0.0159002	0.151409	DOWN
Adamts2	0.804994	0.0159059	0.151409	UP
Dctn5	-0.272545	0.0159334	0.151561	DOWN
Gpatch11	-0.4028	0.0160272	0.152258	DOWN
Mgat2	0.53329	0.0160387	0.152258	UP
Riok2	0.365769	0.0160535	0.152258	UP
Taf8	0.464102	0.0160538	0.152258	UP
Kdelc1	-1.1753	0.0160641	0.152258	DOWN
Gstk1	-0.377718	0.0161211	0.152504	DOWN
Urb1	0.530307	0.016124	0.152504	UP
Brd3os	-1.22277	0.0161245	0.152504	DOWN
Pdp1	-0.694165	0.016163	0.152759	DOWN
Pde1b	1.11312	0.0162013	0.152986	UP
Pigm	0.439948	0.0162101	0.152986	UP
Gpalpp1	0.348839	0.0162237	0.153006	UP
Wtap	0.26013	0.0163381	0.153975	UP
Xbp1	0.472833	0.0163546	0.154021	UP
Zfp418	-1.19724	0.0163699	0.154056	DOWN
Timm10	0.536694	0.0163932	0.154165	UP
Abhd2	1.40489	0.0164539	0.154627	UP
Cd209c	1.79899	0.0165285	0.155218	UP
Mki67	-2.8814	0.0165438	0.155252	DOWN
Sf1	0.374856	0.016573	0.155416	UP
Ccdc115	0.311531	0.0166922	0.156423	UP
Mrnip	-1.22081	0.0168949	0.15821	DOWN
Ripk1	0.439678	0.0169227	0.15829	UP
Scamp3	-0.389393	0.0169272	0.15829	DOWN
Ccl9	1.12556	0.0169658	0.158539	UP
Josd2	-0.736352	0.0170469	0.159184	DOWN
Gpr156	3.53032	0.0170815		UP
Stt3b	0.395268	0.0171058	0.159622	UP
Oaz2	-0.265758	0.0171565	0.159983	DOWN
Vmn2r95	-2.37412	0.0171753		DOWN
Erh	0.460168	0.0172134	0.1604	UP
Acer3	0.564193	0.0172562	0.160504	UP
Mreg	-0.525518	0.0172719	0.160504	DOWN
Yod1	0.595822	0.017272	0.160504	UP
Emc7	0.211147	0.0172729	0.160504	UP
Olfr571	-3.16122	0.0172866		DOWN
Tarbp2	-0.369749	0.0172938	0.160585	DOWN
Mphosph8	0.374194	0.0173139	0.160659	UP
Rps6	0.32788	0.0173365	0.160757	UP
Acd	-1.5094	0.0174258	0.161472	DOWN
Scfd2	0.550684	0.0174647	0.16172	UP
Ndn	-0.703715	0.0175201	0.162032	DOWN
Tmem87b	0.580678	0.017523	0.162032	UP
Cdca4	0.573505	0.0175717	0.162364	UP
Rpf2	0.459041	0.0175903	0.162364	UP
Cstf3	-0.512664	0.0175955	0.162364	DOWN
Ptbp2	0.427349	0.0176257	0.162409	UP
Mmp15	-0.684997	0.0176356	0.162409	DOWN
Tmem63b	-0.427383	0.0176372	0.162409	DOWN
Asap2	0.623302	0.017659	0.162497	UP
Luzp1	0.433335	0.0177032	0.162768	UP
Them6	-0.701603	0.017713	0.162768	DOWN
1810030O07Rik	-0.334636	0.0178095	0.163542	DOWN
Casp8	0.600112	0.0178433	0.163738	UP
Ppt2	-0.318471	0.0178592	0.163771	DOWN
Aga	-0.448857	0.01788	0.163849	DOWN
Kcnrg	-1.37428	0.0179173		DOWN
Aqp11	-1.20268	0.0179193	0.164096	DOWN
Lmbr1	-0.463853	0.0179592	0.164347	DOWN
Fpr2	3.08755	0.0180008		UP
Zfp800	0.670664	0.0180127	0.164723	UP
Adi1	-0.66026	0.018033	0.164795	DOWN
Gm4841	-1.85198	0.0180398		DOWN
Hexa	-0.34352	0.0180678	0.165	DOWN
Cmss1	-0.407398	0.0180821	0.165016	DOWN
Fat2	16.7933	0.018177		UP
Olfr648	-1.45496	0.0181818	0.165812	DOWN
Bag5	0.383008	0.0181952	0.16582	UP
Col1a1	-0.924115	0.0182108	0.165849	DOWN
Zbtb2	0.537523	0.0182448	0.166044	UP
Pex1	-0.457073	0.018283	0.166277	DOWN
Zfp281	0.429202	0.0183052	0.166365	UP
Dyrk1b	-0.54368	0.0183434	0.166599	DOWN
Fam71e1	-2.95128	0.0184088		DOWN
Rftn2	-1.17019	0.0184099	0.167088	DOWN
Sap30	0.710155	0.0184268	0.167127	UP
Slc5a6	-0.85159	0.0184446	0.167143	DOWN
Xpo1	-0.48817	0.0184538	0.167143	DOWN
Fn3krp	-0.58473	0.0184899	0.167355	DOWN
Lsm7	-0.476022	0.0185088	0.167412	DOWN
Fam220a	-0.400915	0.0185428	0.167593	DOWN
Fn3k	-0.910062	0.0185541	0.167593	DOWN
Elovl1	0.504004	0.0185789	0.167703	UP
Rgmb	-0.348737	0.0186274	0.167937	DOWN
Rbm12	0.621606	0.0186301	0.167937	UP
Fbxl3	0.368102	0.0186697	0.16818	UP
Cramp1l	0.386588	0.0186988	0.168275	UP
Limk1	0.742224	0.0187057	0.168275	UP
Ccdc90b	-0.342573	0.0187372	0.168444	DOWN
Rpl10	0.573362	0.0187513	0.168457	UP
Zfp975	-0.644773	0.018837	0.169112	DOWN
Bcl2l11	0.699138	0.0188513	0.169126	UP
Rnf114	-0.50112	0.0189037	0.169481	DOWN
Smarcal1	-0.337346	0.0189188	0.169502	DOWN
Rpl3	0.621344	0.0189374	0.169554	UP
Gm10282	-1.43306	0.0189777	0.169801	DOWN
Sele	2.27564	0.0190283	0.170139	UP
D230025D16Rik	0.661646	0.0190473	0.170194	UP
Rab28	-0.253849	0.0190802	0.170373	DOWN
Wbp2	-0.323316	0.0191113	0.170535	DOWN
Il13ra1	0.843657	0.0192223	0.17138	UP
Limd1	0.265283	0.0192317	0.17138	UP
Sp1	0.260932	0.0192473	0.171403	UP
Pcolce	-0.672108	0.0192717	0.171505	DOWN
Prpf19	-0.370325	0.0193824	0.172374	DOWN
Usp21	-0.448338	0.0194232	0.172583	DOWN
Sox11	2.1277	0.0194233		UP
C3ar1	1.11144	0.0194319	0.172583	UP
Tle2	-2.66519	0.0194736	0.172838	DOWN
Rgcc	1.02938	0.019504	0.172926	UP
Acss2	-0.822986	0.0195096	0.172926	DOWN
Ccnh	-0.364973	0.0195401	0.172971	DOWN
Togaram1	0.434053	0.0195408	0.172971	UP
Nedd9	0.97729	0.0195571	0.173	UP
Ppil2	-0.286852	0.0195853	0.173134	DOWN
Rab29	0.535725	0.0196105	0.17321	UP
Tmem39a	0.704167	0.01962	0.17321	UP
Zswim1	-0.524581	0.0196517	0.173345	DOWN
Jak1	0.276211	0.0196614	0.173345	UP
Asna1	-0.319605	0.019767	0.173967	DOWN
Tnfrsf12a	1.28147	0.019769	0.173967	UP
Sppl2b	-0.485867	0.0197714	0.173967	DOWN
Golga7	0.227286	0.0197926	0.174038	UP
Galnt11	-0.389535	0.0198213	0.174176	DOWN
Prkdc	-0.50051	0.0198845	0.174421	DOWN
Il17ra	1.53702	0.0198886	0.174421	UP
Prpf3	0.390708	0.0198887	0.174421	UP
Astn1	-1.56164	0.0199156		DOWN
Bcar3	0.843605	0.0199185	0.174566	UP
Strip2	-1.29173	0.0199604	0.174579	DOWN
Cdc73	0.279368	0.0199678	0.174579	UP
Hivep2	-0.434458	0.0199764	0.174579	DOWN
Tmem259	-0.280817	0.019991	0.174579	DOWN
Gas2l3	1.24229	0.0199976	0.174579	UP
Fchsd2	-0.687116	0.0199989	0.174579	DOWN
Rpsa	0.383909	0.0200248	0.174639	UP
Vdr	2.07896	0.0200321	0.174639	UP
Add3	-0.349907	0.0201198	0.175268	DOWN
Spop	-0.184971	0.0201312	0.175268	DOWN
Baat	2.53886	0.0201439	0.175268	UP
Nlrx1	-0.459388	0.0201698	0.175378	DOWN
Mov10l1	2.84902	0.0201957	0.175489	UP
Tinagl1	0.73755	0.0202411	0.175768	UP
Arid5b	0.788362	0.0202663	0.175871	UP
Fdxr	-0.600051	0.0202823	0.175895	DOWN
Cr1l	-0.216966	0.0203354	0.176179	DOWN
Igfbp3	0.995097	0.0203416	0.176179	UP
Chmp4b	0.25459	0.0203582	0.176208	UP
Tpm3-rs7	-2.72861	0.020387		DOWN
Anapc4	-0.888851	0.0203956	0.176416	DOWN
Ist1	0.277453	0.0204358	0.176528	UP
Cox20	-0.51761	0.0204477	0.176528	DOWN
Rspo3	-0.80141	0.0204485	0.176528	DOWN
Shb	1.23615	0.0204774	0.176663	UP
Tldc1	-0.552424	0.0204922	0.176676	DOWN
Ostm1	-0.389617	0.0205189	0.176678	DOWN
Acad12	-0.498961	0.0205192	0.176678	DOWN
Dcst2	2.31785	0.0205521	0.176847	UP
Dnajc4	-0.410319	0.0205911	0.177067	DOWN
Uchl3	0.321263	0.020638	0.177331	UP
Usp36	0.431692	0.0206485	0.177331	UP
Scrn3	-0.301693	0.0206641	0.17735	DOWN
Yif1a	-0.320415	0.0206938	0.17749	DOWN
Intu	-0.744809	0.0207123	0.177534	DOWN
Zbtb9	2.53815	0.0207593	0.177822	UP
Mapk8	0.367767	0.020778	0.177824	UP
Vps35l	-0.319102	0.0207864	0.177824	DOWN
Spag9	0.397682	0.0208097	0.177909	UP
Trappc13	-0.24659	0.0209116	0.178665	DOWN
Tmem35b	-1.13154	0.0209438	0.178769	DOWN
Khdc4	0.833395	0.0209507	0.178769	UP
Phf1	-0.361231	0.0209964	0.179043	DOWN
Tmem88b	1.05947	0.0210128	0.179068	UP
Nepro	0.541444	0.0210271	0.179075	UP
Dot1l	0.499584	0.0210591	0.179131	UP
Abcb6	-0.516554	0.0210607	0.179131	DOWN
Coro1a	0.985498	0.0210985	0.179246	UP
Pinx1	0.749066	0.0211106	0.179246	UP
Iqsec3	3.20689	0.0211128		UP
Acot2	1.05196	0.0211218	0.179246	UP
Gmpr2	0.666998	0.0211283	0.179246	UP
Polr3c	-0.330362	0.0211683	0.17947	DOWN
Pcdhga10	1.21143	0.0212164	0.179763	UP
Slc38a2	0.740348	0.0213154	0.180487	UP
Ndufaf1	-0.396837	0.0213853	0.180963	DOWN
Peg12	2.65892	0.0213873		UP
Srsf3	0.855668	0.0214128	0.18108	UP
Dynlrb1	-0.272479	0.0214343	0.181147	DOWN
Btk	1.81849	0.0215189	0.18165	UP
Kcnip2	1.28203	0.021532	0.18165	UP
Klf4	0.903424	0.021535	0.18165	UP
Pdzd3	-1.7826	0.0215903	0.182001	DOWN
Zhx1	-0.316417	0.0216558	0.182437	DOWN
Obsl1	-0.632758	0.0216857	0.182573	DOWN
Amph	-5.84546	0.0216967		DOWN
Rhob	0.529387	0.0217823	0.18327	UP
Prpsap2	-1.14382	0.021797	0.183277	DOWN
Cpq	-0.447941	0.0218392	0.183431	DOWN
Klhl31	-0.666319	0.021843	0.183431	DOWN
Lrrc42	-0.545131	0.0218935	0.183642	DOWN
Nek7	0.356084	0.0219227	0.183642	UP
Ccnt1	0.314624	0.0219309	0.183642	UP
P2rx6	-0.99893	0.0219364	0.183642	DOWN
Sec24a	0.432466	0.0219374	0.183642	UP
Setd1b	0.413426	0.0219636	0.183673	UP
Telo2	-0.774468	0.0219688	0.183673	DOWN
Olfr1150-ps1	3.49612	0.0221245		UP
Rps15a	0.300033	0.0221496	0.185069	UP
Kdm6a	0.402103	0.0221755	0.185168	UP
Nme7	-1.21584	0.0222091	0.1853	DOWN
Rab3gap1	0.389285	0.0222456	0.1853	UP
Slc3a2	0.596964	0.0222542	0.1853	UP
Mrpl46	-0.342966	0.0222588	0.1853	DOWN
Txndc16	-0.58708	0.022267	0.1853	DOWN
Sept2	0.221866	0.0222884	0.1853	UP
Ncoa6	0.344483	0.0222994	0.1853	UP
Lrrc3	-1.09706	0.0223031	0.1853	DOWN
Slc25a15	-0.579214	0.0223695	0.185735	DOWN
Desi1	-0.460664	0.0224214	0.18605	DOWN
Zfp617	0.339358	0.0224408	0.186094	UP
Sympk	-0.444768	0.0224921	0.186387	DOWN
Aff2	-2.9961	0.0225023		DOWN
Dhps	-0.440964	0.0225042	0.186387	DOWN
Sec61a1	0.580368	0.022605	0.187064	UP
Zfp317	0.353101	0.0226141	0.187064	UP
Olfr1489	-1.17229	0.022687		DOWN
Map3k19	3.28703	0.0227057		UP
Phtf2	-0.347382	0.0227266	0.187877	DOWN
Gga1	-0.639804	0.022854	0.188812	DOWN
Pcyox1	-0.294712	0.0228926	0.188922	DOWN
Pigs	-0.393455	0.0228957	0.188922	DOWN
Chfr	-0.842034	0.0229662	0.189385	DOWN
Rsph3a	-0.788749	0.0230602	0.190042	DOWN
Ppp2ca	0.2853	0.0230882	0.190126	UP
Ctgf	1.10827	0.0231047	0.190126	UP
Tat	-3.21173	0.0231134	0.190126	DOWN
4933411K16Rik	3.57226	0.0232461		UP
Ahctf1	0.339377	0.0232495	0.191067	UP
Exd1	-0.915347	0.0232566	0.191067	DOWN
Zbtb4	-0.412989	0.0233255	0.191343	DOWN
Mup7	2.83968	0.0233324	0.191343	UP
Fut8	0.696126	0.023357	0.191343	UP
Fam13c	0.678318	0.0233582	0.191343	UP
Mapkap1	-0.348238	0.0233648	0.191343	DOWN
Hsd11b1	0.823911	0.0233797	0.191343	UP
Gtf2b	0.395068	0.0233912	0.191343	UP
Rrm1	-0.420519	0.0234501	0.191706	DOWN
Olfr351	2.13203	0.0234845	0.191858	UP
Entpd5	-0.454637	0.0234976	0.191858	DOWN
Snx7	0.630111	0.0235447	0.192125	UP
Ttll4	0.831707	0.0235899	0.192376	UP
Msl2	0.237267	0.0236359	0.192632	UP
Lyrm7	-0.663225	0.0237113	0.193128	DOWN
Rac1	0.228729	0.0237296	0.193158	UP
Cps1	-3.02737	0.0237591	0.19328	DOWN
Zfp78	-1.13049	0.0238292	0.193637	DOWN
Kctd21	-0.912869	0.0238524	0.193637	DOWN
Hp	0.851935	0.023857	0.193637	UP
Csf2ra	0.988841	0.0238643	0.193637	UP
Tex261	-0.246237	0.0239123	0.193637	DOWN
Katnbl1	0.62614	0.0239184	0.193637	UP
Prss55	3.2884	0.0239197		UP
Klhdc3	-0.343299	0.0239321	0.193637	DOWN
Gspt1	0.208524	0.0239403	0.193637	UP
Olfr1328	2.15675	0.0239434	0.193637	UP
Tufm	-0.372232	0.0239491	0.193637	DOWN
Setd6	0.568579	0.0239639	0.193639	UP
Epgn	2.76448	0.0240766		UP
Piga	2.5454	0.0240967	0.194546	UP
Tctn1	-0.710294	0.0241055	0.194546	DOWN
Midn	0.594606	0.0241526	0.194774	UP
Lzts1	-0.85045	0.0241632	0.194774	DOWN
Dsg1c	2.51549	0.0241785	0.194779	UP
Emp1	1.44849	0.0242027	0.194784	UP
Dhx8	0.374934	0.0242085	0.194784	UP
Inka2	-0.694464	0.0243014	0.19531	DOWN
Gpr65	-2.49419	0.0243033	0.19531	DOWN
Plaur	1.76647	0.024344	0.195427	UP
Cbx8	-1.11782	0.0243473	0.195427	DOWN
Ankrd2	0.794617	0.024415	0.195852	UP
Slc10a3	0.542341	0.0245398	0.196666	UP
Larp4	0.674683	0.0245462	0.196666	UP
Camta2	-0.566923	0.0245672	0.196715	DOWN
Arsg	0.766649	0.024692	0.197595	UP
Cct5	0.268285	0.0247193	0.197695	UP
Zfp423	-0.716544	0.0247531	0.197846	DOWN
Mlh1	-0.489192	0.0247923	0.19804	DOWN
Shroom2	1.61747	0.024843	0.198325	UP
Rtl3	-1.8656	0.0248452		DOWN
Ewsr1	0.316901	0.0249098	0.198665	UP
Akap8l	0.359349	0.0249155	0.198665	UP
Slc2a10	-0.931344	0.0249342	0.198694	DOWN
Gabarapl2	0.303771	0.0249505	0.198705	UP
Mrpl18	-0.263416	0.0250251	0.199119	DOWN
Atp6v0d1	0.277971	0.0250325	0.199119	UP
Rbm28	-0.347994	0.0250484	0.199126	DOWN
Spr	-0.3706	0.0250729	0.199201	DOWN
Mrps6	-0.49116	0.0250966	0.19927	DOWN
Olr1	3.13415	0.0251091		UP
U2af1l4	-0.455145	0.0251279	0.199399	DOWN
Nrcam	2.443	0.0252341		UP
Adamts1	1.05778	0.0252415	0.200181	UP
Mnt	0.410796	0.0252765	0.20024	UP
Tmem265	1.5029	0.0252875	0.20024	UP
Pira2	2.64045	0.0253217	0.20024	UP
Bcap29	0.343811	0.025324	0.20024	UP
Cep57	0.367595	0.0253244	0.20024	UP
Plekhn1	-0.520474	0.0253544	0.200357	DOWN
Irgm1	-0.422698	0.0254048	0.200636	DOWN
Mcmbp	0.257044	0.0255147	0.201384	UP
Aip	-0.32741	0.0255377	0.201445	DOWN
Pttg1	-0.367052	0.0256103	0.201847	DOWN
Speg	-0.476186	0.0256198	0.201847	DOWN
S100a16	0.380469	0.0256349	0.201847	UP
Gdap2	0.416801	0.0256595	0.201847	UP
Rbm3	0.654699	0.0256672	0.201847	UP
Myo1g	2.05832	0.0256799	0.201847	UP
Tecr	-0.412353	0.0257012	0.201895	DOWN
Btbd6	-0.450445	0.0257253	0.201964	DOWN
Nfic	-0.356954	0.025771	0.202168	DOWN
Tiam2	1.48805	0.0257817	0.202168	UP
Ube2d3	0.261029	0.0258073	0.202249	UP
Gm5150	3.03968	0.0258221		UP
Zfp706	0.24685	0.0258596	0.202539	UP
Gak	0.3369	0.0258754	0.202543	UP
Ddx46	0.259945	0.0259376	0.20291	UP
Med24	-0.469162	0.0260393	0.203586	DOWN
Cdk5	-0.481583	0.0260806	0.203673	DOWN
Trappc5	-0.279792	0.0261007	0.203673	DOWN
Mtpap	0.676281	0.0261072	0.203673	UP
Dcaf10	0.363361	0.0261119	0.203673	UP
Endog	-0.457547	0.0261502	0.203848	DOWN
Nmnat3	-0.432953	0.0261651	0.203848	DOWN
Gbp3	-0.844665	0.026197	0.203977	DOWN
Arl8a	0.323864	0.0262656	0.204391	UP
Naf1	0.463591	0.0263232	0.204719	UP
Ppdpf	-0.570593	0.0263893	0.205112	DOWN
Huwe1	0.343074	0.0264093	0.205146	UP
Mfsd7a	-1.17913	0.0264245	0.205146	DOWN
Slc25a5	0.467952	0.0264553	0.205264	UP
Olfr466	-2.79699	0.0264848		DOWN
Ero1l	0.496591	0.0265116	0.205581	UP
Rhbdd1	0.337167	0.0265511	0.205623	UP
Zfp260	-0.402407	0.0265625	0.205623	DOWN
Stra6l	2.81223	0.026578	0.205623	UP
Tnpo1	0.294183	0.0266048	0.205623	UP
Ppt1	-0.43638	0.0266113	0.205623	DOWN
Klf11	0.543121	0.0266159	0.205623	UP
Kras	0.38472	0.0266256	0.205623	UP
Pura	0.444073	0.0266812	0.205674	UP
H3f3b	0.763402	0.0266828	0.205674	UP
Sec14l1	-0.407193	0.0266973	0.205674	DOWN
Atp6ap1	-0.212912	0.0267019	0.205674	DOWN
Depp1	1.05699	0.0267137	0.205674	UP
Dis3l	-0.359108	0.0267252	0.205674	DOWN
Agbl3	1.90283	0.0267587	0.205813	UP
Cd3eap	0.28795	0.0267983	0.205997	UP
Rusc2	0.623057	0.0269141	0.206767	UP
Trim41	-0.266016	0.0269598	0.206915	DOWN
Rbmxl1	0.346988	0.0269644	0.206915	UP
Arpc5	0.330594	0.0270663	0.207576	UP
Acp6	-0.414726	0.027088	0.207622	DOWN
Scfd1	0.368406	0.0271078	0.207654	UP
Tsen34	-0.3447	0.0271377	0.207763	DOWN
Gm10644	-1.23147	0.0272023	0.208069	DOWN
Pgam2	-0.63959	0.0272207	0.208069	DOWN
Gstm3	-2.90258	0.0272304	0.208069	DOWN
Fibin	0.848033	0.0272404	0.208069	UP
Hat1	-0.351294	0.0273725	0.20894	DOWN
Apip	-0.399823	0.027386	0.20894	DOWN
Slc25a37	-0.643642	0.0274094	0.208999	DOWN
Gm42742	-0.653218	0.0274357	0.209079	DOWN
Odc1	0.47674	0.0274651	0.209183	UP
Inpp5b	1.22354	0.0274954	0.209245	UP
Emc1	-0.318244	0.0275081	0.209245	DOWN
Rassf3	-0.389109	0.0275219	0.209245	DOWN
Tmem127	-0.228808	0.0275446	0.209245	DOWN
Slc35c1	0.487112	0.0275522	0.209245	UP
Gsto2	-1.76539	0.0275557		DOWN
Angptl7	1.51083	0.0276039	0.209518	UP
Dpp4	-1.04698	0.0276534	0.209773	DOWN
Hspbp1	-0.371399	0.027684	0.209789	DOWN
Fam213b	-0.585775	0.0276871	0.209789	DOWN
Zdhhc16	-0.517546	0.0277492	0.21014	DOWN
Dele1	-0.237445	0.0277652	0.210141	DOWN
Zbtb7c	1.11664	0.0277981	0.21027	UP
Fer1l5	-1.52612	0.0278393		DOWN
Ube2j1	0.279572	0.0279159	0.211041	UP
Robo2	-2.06758	0.027987		DOWN
Glmp	-0.492044	0.0280005	0.211559	DOWN
Rc3h1	0.373486	0.0281032	0.212136	UP
Vnn1	1.74405	0.0281088	0.212136	UP
Kcnab2	1.34015	0.028195	0.212579	UP
Wfdc21	1.79373	0.0281995	0.212579	UP
Rpusd2	0.690768	0.028231	0.212585	UP
Gnaq	0.304622	0.0282325	0.212585	UP
Ndst2	0.400034	0.0282945	0.212701	UP
Kif1bp	-0.465363	0.0282958	0.212701	DOWN
Bbs2	-0.56528	0.0282959	0.212701	DOWN
Il6	2.22071	0.0283866	0.213262	UP
Fadd	-0.479478	0.0284565	0.213554	DOWN
Ufsp1	-0.583024	0.0284578	0.213554	DOWN
Kcna6	3.72321	0.02848		UP
Atad2b	0.332328	0.028549	0.214031	UP
Dazap1	0.245806	0.0285566	0.214031	UP
Brip1	-0.843218	0.0285697	0.214031	DOWN
Fan1	-0.518595	0.0286166	0.214261	DOWN
Gatad2a	0.397779	0.0287478	0.215122	UP
Lysmd3	0.521964	0.0288057	0.215434	UP
Alg11	0.339086	0.0288449	0.215575	UP
Baiap2	0.745308	0.0288571	0.215575	UP
Cadm2	1.74963	0.0288608		UP
Tmem107	-1.71098	0.028924	0.215953	DOWN
Usp42	0.427823	0.0289476	0.215983	UP
Ces2c	1.60341	0.0289632	0.215983	UP
Nudt3	-0.34923	0.028979	0.215983	DOWN
Rpl8	0.239524	0.0289933	0.215983	UP
Phactr4	0.331775	0.0290487	0.216159	UP
Tango6	-0.46828	0.0290494	0.216159	DOWN
Foxo6	-1.30832	0.0290596		DOWN
Usp25	0.348566	0.0290711	0.216199	UP
Styk1	2.53047	0.0291094		UP
N4bp2l2	0.359164	0.0291485	0.216653	UP
Itih1	-2.66557	0.0291774	0.216667	DOWN
Arap1	-0.68317	0.029183	0.216667	DOWN
Aplnr	-1.52535	0.0292139	0.216769	DOWN
Trpc4ap	-0.210182	0.0292295	0.216769	DOWN
Bmpr2	0.253376	0.0292493	0.216795	UP
Atxn1	-0.435595	0.0292658	0.216796	DOWN
Lta4h	-0.314927	0.0292846	0.216814	DOWN
Gm4737	5.89461	0.0293749	0.217133	UP
Arl6ip5	0.358388	0.0293882	0.217133	UP
Axin1	0.257012	0.0294001	0.217133	UP
Clec4a2	1.25629	0.0294038	0.217133	UP
Itm2a	-0.505088	0.0294095	0.217133	DOWN
Epm2aip1	0.353139	0.0294454	0.217192	UP
Phax	0.306604	0.0294503	0.217192	UP
Faim	0.661457	0.0295139	0.21754	UP
Lzts3	-0.72035	0.0295717	0.217806	DOWN
Hoxb4	-1.63136	0.0295835	0.217806	DOWN
Lztr1	-0.383717	0.0296096	0.217806	DOWN
Birc5	1.63062	0.0296157	0.217806	UP
Zpr1	0.403985	0.0296672	0.218063	UP
Lars	0.250677	0.0297167	0.218307	UP
Mapk9	-0.246805	0.0298066	0.218816	DOWN
Slc9a3r1	0.867314	0.0298191	0.218816	UP
Mtf1	-0.339852	0.0298647	0.21903	DOWN
Plscr1	0.988744	0.0298982	0.219154	UP
Ccl21a	-1.06019	0.029959	0.219479	DOWN
Rfxank	-0.461813	0.0299985	0.219646	DOWN
Thy1	-0.858506	0.0300809	0.220124	DOWN
Arih2	0.217205	0.0300969	0.220124	UP
Nfkbia	0.589407	0.030164	0.220487	UP
Kbtbd13	-0.773211	0.0301868	0.220487	DOWN
Mfn1	-0.183146	0.0301965	0.220487	DOWN
Wnt2	2.27221	0.0301973		UP
Katnb1	-0.510136	0.03022	0.220538	DOWN
Pcid2	-0.422365	0.0302471	0.220614	DOWN
Cldn23	2.52684	0.0302727		UP
Inpp4b	0.613678	0.0303171	0.221001	UP
Tnip3	2.86917	0.0303318		UP
Eaf1	0.342173	0.0303335	0.221001	UP
Cfap100	2.60459	0.0303774		UP
Trappc12	-0.27213	0.0304044	0.221084	DOWN
Hilpda	0.95513	0.0304203	0.221084	UP
Cbll1	0.332234	0.0304281	0.221084	UP
Shpk	0.702307	0.0304302	0.221084	UP
Fbxo28	0.25425	0.0304319	0.221084	UP
Phka1	-0.361397	0.0304449	0.221084	DOWN
Gria4	-2.57241	0.0305129		DOWN
Ttc7	0.783287	0.0305165	0.221219	UP
Cbx1	-0.754883	0.0305215	0.221219	DOWN
Tmem43	0.601945	0.0305328	0.221219	UP
Zcwpw1	-2.13934	0.0305376	0.221219	DOWN
Zranb1	0.30632	0.0305469	0.221219	UP
Ccdc61	-0.913142	0.0306246	0.221583	DOWN
Zfp850	0.913333	0.0306305	0.221583	UP
Rfc3	-0.874392	0.0306489	0.221595	DOWN
Rabggta	-0.597545	0.0307461	0.222018	DOWN
Ung	-0.608433	0.0307531	0.222018	DOWN
Glt28d2	-0.584734	0.0307577	0.222018	DOWN
Slc39a10	0.809546	0.0307836	0.22208	UP
Spdya	0.958728	0.0307997	0.22208	UP
Fam13b	0.599532	0.0308214	0.222087	UP
Tead4	0.979973	0.0308343	0.222087	UP
Cdc42se1	0.428654	0.0308831	0.222318	UP
Igf2bp2	1.89396	0.0309117	0.222403	UP
Tmem98	-0.915969	0.0309678	0.222686	DOWN
Arhgef12	0.328558	0.0310545	0.223154	UP
Frzb	-0.860732	0.0310665	0.223154	DOWN
Il21r	2.17136	0.0310836		UP
Sppl2a	-0.318919	0.0311848	0.223687	DOWN
Per3	-1.10333	0.0311887	0.223687	DOWN
Tsc22d2	0.486784	0.0312052	0.223687	UP
Sart3	-0.481592	0.0312414	0.223687	DOWN
Msn	0.693029	0.0312601	0.223687	UP
Prpf38a	0.299128	0.0312619	0.223687	UP
Pars2	-0.506125	0.0312699	0.223687	DOWN
Casp3	-0.64621	0.0312757	0.223687	DOWN
Kif13a	-0.304735	0.031337	0.224005	DOWN
Sdccag8	-0.622988	0.0313619	0.224062	DOWN
Med15	0.266037	0.0314208	0.224293	UP
Mcm3ap	-0.321495	0.031428	0.224293	DOWN
Kdelc2	-0.462907	0.0314674	0.224453	DOWN
Hdac9	-0.783685	0.0315444	0.224881	DOWN
Cebpb	0.654355	0.0316106	0.225232	UP
Slc2a12	-0.72892	0.0316624	0.22548	DOWN
Dffa	-0.257514	0.0316851	0.22552	DOWN
Zfp330	0.371122	0.0317113	0.225586	UP
Faf1	-0.270454	0.0317901	0.226025	DOWN
Gm3636	2.07848	0.0318521	0.22628	UP
Tmub1	-0.471555	0.0318757	0.22628	DOWN
Zfp36	0.714736	0.0318772	0.22628	UP
Gid8	-0.222172	0.0319923	0.226721	DOWN
Ehmt2	-0.371128	0.031998	0.226721	DOWN
Col6a5	-2.7885	0.0319984	0.226721	DOWN
Ripk2	-0.794168	0.0320199	0.226721	DOWN
Mb21d2	0.375498	0.0320376	0.226721	UP
Rpl34	0.286357	0.0320472	0.226721	UP
Adal	-0.387758	0.032059	0.226721	DOWN
Dym	-0.330895	0.0321072	0.226941	DOWN
B3gnt5	1.93065	0.0321453		UP
Tbrg1	0.547026	0.0321924	0.227422	UP
Selp	1.31018	0.032211	0.227432	UP
Dnah1	2.53693	0.0322358		UP
Flot2	-0.430129	0.0323041	0.227919	DOWN
Spast	-0.239237	0.0323142	0.227919	DOWN
Fzd7	0.666247	0.0323361	0.227951	UP
Cpsf7	0.293627	0.0323927	0.228229	UP
Endov	-0.624539	0.0324156	0.228269	DOWN
Nom1	0.234572	0.0324383	0.228308	UP
Ppp1r14b	0.429332	0.0325076	0.228674	UP
Anxa4	0.341893	0.0325731	0.228847	UP
Vwa7	-0.717216	0.0325997	0.228847	DOWN
Camk2a	-0.510647	0.0326091	0.228847	DOWN
Arhgap35	0.314473	0.0326223	0.228847	UP
1110002E22Rik	0.892254	0.0326275	0.228847	UP
Camk2d	0.354391	0.0326357	0.228847	UP
Stt3a	0.44371	0.0326569	0.228875	UP
Nek6	0.76993	0.0327202	0.229047	UP
Man1a2	0.4752	0.0327414	0.229047	UP
2410002F23Rik	0.603427	0.0327487	0.229047	UP
Lyplal1	-0.898757	0.0327623	0.229047	DOWN
Rbfox2	-0.347871	0.0327758	0.229047	DOWN
Mlkl	0.90161	0.0327852	0.229047	UP
Tnfsf13b	-2.78166	0.0328146		DOWN
Galns	0.467255	0.0328365	0.229213	UP
Mfsd4b3	-0.829486	0.0328435	0.229213	DOWN
Pex5l	1.68416	0.0329185		UP
Igfbp5	-0.820759	0.032942	0.22978	DOWN
Fars2	-0.40097	0.0329696	0.229851	DOWN
Vmn1r175	2.02137	0.0329995		UP
Pex11a	0.528212	0.0330569	0.230285	UP
Zswim8	0.388066	0.0330716	0.230285	UP
Dlgap4	0.31452	0.0330839	0.230285	UP
Olfr18	3.57561	0.033111		UP
Ccdc166	-1.56177	0.0331651	0.230729	DOWN
Sbk2	-0.802749	0.0332093	0.230915	DOWN
Havcr2	1.71315	0.0332246		UP
Pum2	0.215651	0.0332884	0.231253	UP
Vmn1r65	-1.22465	0.0332928	0.231253	DOWN
Chka	0.88852	0.0333231	0.231343	UP
Dync2h1	0.631435	0.0333482	0.231396	UP
Ctps	0.54129	0.0333727	0.231445	UP
Ddx24	0.313641	0.0334057	0.231482	UP
Hps4	-0.580447	0.0334342	0.231482	DOWN
Tbx6	-1.62185	0.0334382		DOWN
Slco2a1	0.624859	0.0334462	0.231482	UP
Drc3	-1.23088	0.0334479	0.231482	DOWN
Zfand2b	-0.512219	0.0334854	0.231485	DOWN
Pcdhgb6	-0.968875	0.0334906	0.231485	DOWN
Ssc5d	-0.752544	0.0335008	0.231485	DOWN
Txnl1	0.251651	0.0335297	0.231565	UP
Ncf1	0.917184	0.0335594	0.231598	UP
Serpine1	1.44369	0.0336147	0.231598	UP
[truncated: 19,839 more rows]

## Sheet: Muscle (6h)
Gene name	L2FC	P-VALUE	P-ADJ	DIRECTION
Rnf186	-24.0857	1.48195e-26	2.35645e-22	DOWN
Wfdc15b	-23.7467	1.22125e-12	9.70951e-09	DOWN
Prom2	-16.7683	5.53431e-12	2.93337e-08	DOWN
Lipc	15.2552	1.15139e-10	4.57707e-07	UP
Fgf12	-23.2118	4.96057e-10	1.49441e-06	DOWN
Adamdec1	-15.6434	6.44565e-10	1.49441e-06	DOWN
Defb1	-14.0943	6.57876e-10	1.49441e-06	DOWN
Cldn14	-15.061	2.41721e-09	4.80451e-06	DOWN
Rasef	-13.3028	8.94891e-09	1.58107e-05	DOWN
9330182L06Rik	-15.0452	1.4609e-07	0.000232298	DOWN
Xlr4a	-14.8501	5.23507e-07	0.000756753	DOWN
Ildr1	-14.6284	1.2491e-06	0.00165516	DOWN
Mindy3	-5.25791	3.04015e-06	0.00350533	DOWN
Mrpl57	-1.31091	3.08626e-06	0.00350533	DOWN
Cish	-2.844	6.97449e-06	0.00739343	DOWN
Slc19a2	0.909357	1.85361e-05	0.0184214	UP
Rbm4b	1.54224	5.06764e-05	0.0474003	UP
Tmem68	-1.41061	6.96938e-05	0.0615667	DOWN
Fam177a	-8.58862	9.12824e-05	0.0755374	DOWN
Klhl36	-3.03066	9.50097e-05	0.0755374	DOWN
Pirb	-5.56247	0.000132001	0.09995	DOWN
Klb	4.59697	0.000141835	0.102514	UP
Gal3st4	-17.6778	0.000190029	0.131376	DOWN
Uckl1	-1.39471	0.000221204	0.146557	DOWN
Olfr1028	4.4379	0.000261756	0.166487	UP
Gm14327	1.54262	0.000279147	0.17072	UP
Gm45837	-15.4882	0.000296864	0.174831	DOWN
Gm12184	5.04443	0.000393749	0.220729	UP
Aatk	-2.5613	0.000402563	0.220729	DOWN
Arid5a	-1.35253	0.000444586	0.235645	DOWN
Ros1	-24.5086	0.000482595	0.24754	DOWN
Nipsnap1	3.77038	0.000601856	0.294298	UP
Shkbp1	-1.76251	0.000610768	0.294298	DOWN
Lss	-4.90874	0.000637806	0.298287	DOWN
Cwc22	0.819237	0.000673467	0.305966	UP
Mup19	6.88226	0.0007483	0.33052	UP
L3hypdh	2.05786	0.00085276	0.346017	UP
Scand1	-1.55762	0.000874452	0.346017	DOWN
Aspg	3.91833	0.000886491	0.346017	UP
Tada1	-0.919963	0.000887073	0.346017	DOWN
Jak3	-1.14692	0.000922434	0.346017	DOWN
Rfx5	-5.59395	0.000929419	0.346017	DOWN
Med25	-0.577201	0.000935712	0.346017	DOWN
Myo19	4.54675	0.00100707	0.363941	UP
Cacna1g	-1.42475	0.0010952	0.386996	DOWN
Col6a6	2.62102	0.00116159	0.39796	UP
Nadsyn1	-4.47656	0.00118951	0.39796	DOWN
Abcc8	-2.52283	0.00120131	0.39796	DOWN
Prickle4	4.0568	0.00125179	0.406219	UP
Mup20	4.01445	0.00132868	0.422547	UP
Ascc2	0.437713	0.00153368	0.468778	UP
Mthfs	1.90593	0.00156264	0.468778	UP
Erg28	-1.31998	0.00157181	0.468778	DOWN
Ndufa10	-0.693234	0.00159198	0.468778	DOWN
Nsl1	3.65267	0.00165025	0.477104	UP
Gga1	-0.955003	0.001713	0.485552	DOWN
Ndufaf8	-0.961511	0.00176264	0.485552	DOWN
4930486L24Rik	-5.25253	0.00177108	0.485552	DOWN
Ppp1r35	-1.67683	0.00204297	0.550598	DOWN
Ffar4	2.05787	0.00233072	0.608048	UP
Zfp217	0.718676	0.00233262	0.608048	UP
Pik3cb	-1.70382	0.0026125	0.65249	DOWN
Fam149a	1.02466	0.00262356	0.65249	UP
Zxdc	0.472643	0.00262912	0.65249	UP
Mdm1	1.10066	0.00266725	0.65249	UP
Idnk	0.734872	0.00281874	0.679102	UP
Rrad	-2.1874	0.00298521	0.708475	DOWN
Pde9a	2.28847	0.00305134	0.713519	UP
Akt1s1	-0.502416	0.00314486	0.724731	DOWN
Adam23	-4.70453	0.00335208	0.761449	DOWN
Mbd6	-0.681248	0.00355162	0.795413	DOWN
Hist1h4h	-1.15608	0.00364149	0.804213	DOWN
Egfl8	-2.54508	0.00376274	0.819608	DOWN
Map3k11	-0.606577	0.00389631	0.836986	DOWN
Lrp3	-1.03327	0.00395901	0.836986	DOWN
Ski	-1.35667	0.00402783	0.836986	DOWN
Naa60	-2.95718	0.00406573	0.836986	DOWN
Gm47283	-1.89212	0.00417863	0.836986	DOWN
Ccdc85b	-1.16829	0.00422443	0.836986	DOWN
Usp21	-0.641065	0.00428336	0.836986	DOWN
Hist2h2aa2	-1.03283	0.00429089	0.836986	DOWN
Zfand1	0.546187	0.00431626	0.836986	UP
Hic1	-1.57634	0.00448162	0.840779	DOWN
Mgat3	-1.77796	0.00448569	0.840779	DOWN
Galnt2	-1.84304	0.00449445	0.840779	DOWN
Slc12a9	-0.872751	0.00458249	0.847281	DOWN
Prx	-1.47618	0.00476518	0.870558	DOWN
Rbm12b2	-1.44377	0.00481788	0.870558	DOWN
G3bp2	0.33742	0.00512771	0.916132	UP
Crebzf	-0.879128	0.00537361	0.9391	DOWN
Ptov1	-0.744676	0.00537439	0.9391	DOWN
C6	3.25159	0.00544452	0.941014	UP
Nup85	0.360628	0.00557904	0.953896	UP
Tbck	-0.508122	0.00578357	0.971742	DOWN
Cutal	-3.84171	0.00590792	0.971742	DOWN
Swt1	0.717885	0.00591371	0.971742	UP
Slc4a2	-0.457057	0.00592786	0.971742	DOWN
Vps29	0.518766	0.00602366	0.975669	UP
Rhof	1.22736	0.00617867	0.975669	UP
Cdkal1	0.557243	0.00624872	0.975669	UP
Cntrob	4.39325	0.0063042	0.975669	UP
Rundc3b	-3.71115	0.00630821	0.975669	DOWN
Stk24	0.467028	0.00635552	0.975669	UP
Gas2l3	-1.61911	0.00644208	0.975669	DOWN
Parp2	0.700523	0.00644269	0.975669	UP
Slc25a37	0.895758	0.00676426	1	UP
Kdm2b	-0.820319	0.00682746	1	DOWN
Fcgr3	1.68466	0.00691432	1	UP
Adcy6	-0.739718	0.00695084	1	DOWN
Kdsr	0.585	0.00699608	1	UP
Ces3a	3.77746	0.00700997	1	UP
Hmgxb4	2.94891	0.00709584	1	UP
Gbp5	2.43226	0.00711488	1	UP
Fign	1.88597	0.00722654	1	UP
Zfp64	-0.68083	0.00761409	1	DOWN
Tcf3	-0.650837	0.00774233	1	DOWN
Gga2	-1.56394	0.00783743	1	DOWN
Ercc5	0.506708	0.00800323	1	UP
Stambp	0.498548	0.00805652	1	UP
Gm5431	3.17063	0.00812447	1	UP
Dnajb13	3.41725	0.00832109	1	UP
Scaf1	-0.426894	0.00834675	1	DOWN
Mup3	3.13256	0.00841778	1	UP
Rps16	-1.09415	0.00849226	1	DOWN
Pias4	-0.668164	0.0086112	1	DOWN
Havcr2	-3.55108	0.00869473	1	DOWN
Erich1	-0.902428	0.00880969	1	DOWN
Cxcl16	-1.95504	0.008931	1	DOWN
Mgat5	0.826717	0.00905183	1	UP
Gm6793	4.88883	0.00928209	1	UP
Rnaseh2c	-0.749129	0.00930866	1	DOWN
Ikzf1	2.14697	0.00930934	1	UP
Sema3a	1.14492	0.00966669	1	UP
Spon2	-4.1086	0.00968786	1	DOWN
Fbxo4	0.728278	0.00969449	1	UP
Gpn3	-0.494358	0.00980138	1	DOWN
Wdr19	-1.42912	0.010013	1	DOWN
Snw1	0.280046	0.010223	1	UP
Bub1b	1.7368	0.0102378	1	UP
Lrat	-3.7058	0.0103684	1	DOWN
Myo1g	3.59817	0.0103705	1	UP
I830077J02Rik	-1.98559	0.0104225	1	DOWN
Casp6	0.698775	0.0105075	1	UP
Dazap1	-0.321135	0.0105818	1	DOWN
Itgb4	-1.36399	0.0106197	1	DOWN
Uimc1	0.511363	0.0108153	1	UP
Brd3	-0.377726	0.0109059	1	DOWN
Ptger1	-3.03027	0.0109397	1	DOWN
Zyg11a	2.26263	0.0111215	1	UP
Asb8	0.325497	0.0114425	1	UP
Tnfsfm13	-1.07631	0.0114631	1	DOWN
Myef2	-0.904477	0.0116955	1	DOWN
Ap5z1	-0.888837	0.0117189	1	DOWN
Mfsd11	0.734879	0.0117468	1	UP
Plekha7	-1.2772	0.0120658	1	DOWN
Ssh1	-0.65522	0.0120964	1	DOWN
Ccdc158	-3.55256	0.0121276	1	DOWN
Zfp526	-0.854574	0.0121349	1	DOWN
Dlx6	-2.87347	0.0122312	1	DOWN
Nsun6	0.800199	0.0123044	1	UP
Gm13889	-1.35838	0.0124262	1	DOWN
Slc17a7	3.81843	0.012452	1	UP
Rfxap	-0.629542	0.0127502	1	DOWN
Rnasel	1.102	0.0127871	1	UP
Zfp335	-0.495945	0.0128955	1	DOWN
Ptk2b	-1.59408	0.0129246	1	DOWN
Otud5	-0.602361	0.0129279	1	DOWN
Trappc6a	-0.893209	0.0130518	1	DOWN
Pllp	-1.76164	0.0130957	1	DOWN
Gpr157	0.700196	0.013111	1	UP
Tpt1	-0.540131	0.0131797	1	DOWN
Sox10	-1.83342	0.0133098	1	DOWN
Usf1	-0.496993	0.0134089	1	DOWN
Ppp1r12c	-0.418751	0.0134167	1	DOWN
Zfp568	-0.710765	0.013464	1	DOWN
Ptgds	3.89735	0.0134742	1	UP
Chd6	-0.503154	0.013486	1	DOWN
Iqce	1.72032	0.0134988	1	UP
Sipa1l3	-1.87742	0.0136205	1	DOWN
Spns3	3.98895	0.0136568	1	UP
Vwa1	-0.821515	0.0136847	1	DOWN
Mfsd13a	3.14204	0.0137111	1	UP
Naa35	0.326181	0.0138891	1	UP
Pde3b	0.922245	0.0139665	1	UP
Cntf	-1.32625	0.0139989	1	DOWN
Stat2	-0.737297	0.0140564	1	DOWN
Coro2b	0.748562	0.0140806	1	UP
Irak4	0.733155	0.0141094	1	UP
Serpina3k	2.45211	0.0141437	1	UP
Rce1	1.18128	0.0141652	1	UP
Gm20425	-5.51745	0.0145004	1	DOWN
Pigyl	-0.597671	0.0145018	1	DOWN
Mid1	-0.71764	0.0145452	1	DOWN
Fam102a	-1.1783	0.0147251	1	DOWN
Syce2	-3.22376	0.0147633	1	DOWN
Cklf	2.07682	0.0147697	1	UP
Proca1	1.88407	0.0148243	1	UP
Nfasc	-1.88522	0.0149006	1	DOWN
Tesc	-3.38683	0.0149665	1	DOWN
Lsm2	-0.969688	0.0149823	1	DOWN
Sdccag8	0.758833	0.0153582	1	UP
Aldh8a1	2.04691	0.0153832	1	UP
Tmem104	-0.857269	0.0156689	1	DOWN
Ahr	-0.873132	0.0157802	1	DOWN
Spire2	-4.08425	0.0159756	1	DOWN
Ccdc122	-1.38459	0.0161589	1	DOWN
Gm10762	-0.673887	0.0161668	1	DOWN
Rilp	-1.31276	0.0162566	1	DOWN
Prdm15	-0.976172	0.0163428	1	DOWN
Mup15	4.91695	0.0164109	1	UP
Vmn2r1	-1.57626	0.0164336	1	DOWN
Ugt2b1	3.21283	0.0165584	1	UP
Stx5a	0.664944	0.0166993	1	UP
Npas1	-3.83679	0.0167571	1	DOWN
Gm20547	5.16634	0.0168121	1	UP
Zfp189	0.883021	0.0168674	1	UP
Kif26a	-1.13342	0.0169433	1	DOWN
Cd247	2.32725	0.0170191	1	UP
Slc35f1	-1.35995	0.0170717	1	DOWN
Elovl3	3.1302	0.01717	1	UP
Dixdc1	-1.00996	0.0172568	1	DOWN
Ctcfl	2.98137	0.0172803	1	UP
Atp6v1h	0.393815	0.0173477	1	UP
Ccdc43	0.277307	0.017593	1	UP
Kdm4a	0.479343	0.0177678	1	UP
Mrpl24	0.266635	0.0178101	1	UP
Slc1a4	-1.39277	0.0179947	1	DOWN
Olfr1156	1.15442	0.0180139	1	UP
Cadps2	1.64754	0.0180362	1	UP
Snip1	0.475577	0.0180716	1	UP
Ppdpf	-0.648267	0.0181581	1	DOWN
Snap29	0.38252	0.0182248	1	UP
Eif4ebp1	-0.648364	0.0183276	1	DOWN
Chkb	-1.17519	0.0184046	1	DOWN
Mbp	-1.31197	0.0186718	1	DOWN
Gm33543	5.02039	0.018768	1	UP
P2rx3	-3.12499	0.0189078	1	DOWN
Hcn1	-2.77881	0.0189427	1	DOWN
Ermard	-0.619348	0.0190385	1	DOWN
Xcr1	3.02171	0.0193077	1	UP
Mpg	0.917024	0.0193251	1	UP
Ccdc9	-0.329574	0.0193828	1	DOWN
Vmn1r16	3.40836	0.0195301	1	UP
C1qtnf4	-1.83196	0.0197327	1	DOWN
Kank3	-0.898049	0.0197475	1	DOWN
Plekha4	-1.32162	0.0198176	1	DOWN
Map2k3	0.375502	0.0199671	1	UP
Cryl1	0.794255	0.0201417	1	UP
Pomc	3.03245	0.0201718	1	UP
Irf2bp1	-0.574464	0.0202906	1	DOWN
Mettl8	1.93	0.0203516	1	UP
Frat1	0.921232	0.0204105	1	UP
Wdr17	-3.55125	0.0205402	1	DOWN
Snca	-1.93388	0.0205665	1	DOWN
Cdh19	-1.1388	0.0206429	1	DOWN
Gm14419	-1.24209	0.020781	1	DOWN
Nr1h2	-0.402995	0.020796	1	DOWN
Rmi1	-0.45194	0.0208998	1	DOWN
Fgg	2.20033	0.0212033	1	UP
Fcgr4	2.34699	0.0212587	1	UP
Acsm1	2.90522	0.0212719	1	UP
Ppp1r13l	-0.764597	0.0212977	1	DOWN
Gm2897	-4.20098	0.0213353	1	DOWN
A930004D18Rik	-1.71454	0.021557	1	DOWN
Tollip	0.231105	0.0215738	1	UP
Tor2a	-0.765656	0.0216096	1	DOWN
Fndc4	-1.60118	0.0217217	1	DOWN
Naa16	1.09353	0.0217535	1	UP
Arhgap23	-0.752297	0.0218254	1	DOWN
Ccm2l	-5.00726	0.0218305	1	DOWN
Junb	-0.978816	0.021862	1	DOWN
Sult1e1	3.23924	0.0218935	1	UP
Nck1	-0.359401	0.0219737	1	DOWN
4930503L19Rik	-2.61035	0.0221556	1	DOWN
Olfr1295	3.32437	0.0223681	1	UP
Mycbp	0.424449	0.0226357	1	UP
Lingo4	1.65981	0.0227266	1	UP
Rbm47	1.47731	0.0229015	1	UP
Mrpl21	0.365488	0.0229473	1	UP
Tap2	1.35478	0.0232027	1	UP
Upk1a	-3.8298	0.0232132	1	DOWN
Phf1	-0.415565	0.0234301	1	DOWN
Rexo1	-0.39621	0.0235232	1	DOWN
Apba3	-0.468299	0.0235887	1	DOWN
Pgam5	0.259551	0.0238015	1	UP
Shb	-1.45839	0.0238245	1	DOWN
Tmem86b	0.849697	0.0238448	1	UP
Dnajc7	0.279433	0.0238491	1	UP
Ubald1	-0.464226	0.0241614	1	DOWN
Olfr1328	-3.18323	0.02418	1	DOWN
Ppargc1a	1.04629	0.0242179	1	UP
Hmcn2	-4.03001	0.0243617	1	DOWN
Slc9a5	-2.5048	0.0244397	1	DOWN
Fam78a	1.53946	0.0244773	1	UP
Necap2	-0.45625	0.0244904	1	DOWN
Nupr1l	2.76456	0.0245094	1	UP
Gjb1	-3.02022	0.0245136	1	DOWN
Usp3	-1.12356	0.0246132	1	DOWN
B4galt7	-0.469447	0.0247194	1	DOWN
Ppia	-1.39999	0.0247938	1	DOWN
1190002N15Rik	-0.726276	0.0248386	1	DOWN
Parp4	0.538663	0.0250293	1	UP
Gprin1	-3.39279	0.0251185	1	DOWN
Grcc10	-0.846001	0.0251598	1	DOWN
Chn1	0.721065	0.025188	1	UP
Frmd6	-0.578177	0.0251969	1	DOWN
Lrrc40	1.10391	0.0252302	1	UP
Galm	0.765543	0.0252562	1	UP
Wdr70	0.26176	0.0252948	1	UP
Galk1	-0.922031	0.0253926	1	DOWN
Bzw1	0.261769	0.0254333	1	UP
Lrch1	0.58824	0.0255332	1	UP
Zfp444	-0.817741	0.0256711	1	DOWN
Hp	0.90685	0.0256958	1	UP
Ifit1bl1	-2.96698	0.0260996	1	DOWN
Slc25a14	1.79938	0.0263713	1	UP
Tk2	1.17751	0.0264012	1	UP
Lrrc55	-3.19148	0.0266506	1	DOWN
Nudt17	1.75187	0.0266621	1	UP
Mup7	2.78129	0.0266846	1	UP
Zfp428	-0.786694	0.0268382	1	DOWN
Ybey	-0.654106	0.0270196	1	DOWN
Slc25a23	-0.451872	0.0271769	1	DOWN
Slc25a25	1.22749	0.0271781	1	UP
Gdi2	0.205169	0.0274816	1	UP
Gmfg	1.40484	0.0275555	1	UP
Cadm4	-0.83174	0.027643	1	DOWN
Bdkrb1	2.34179	0.0276925	1	UP
Shpk	-1.00699	0.0278507	1	DOWN
Tlr9	-3.19681	0.0279013	1	DOWN
Phf11d	-1.06232	0.0279879	1	DOWN
Zfp865	-0.687161	0.0280259	1	DOWN
Glmp	0.533439	0.0280766	1	UP
Deaf1	0.891112	0.028112	1	UP
Slc44a3	-2.96635	0.0282485	1	DOWN
Exoc6b	0.280536	0.0284743	1	UP
Arhgef37	1.24607	0.0285317	1	UP
Mogs	-0.797045	0.0286222	1	DOWN
Mkrn3	-2.87703	0.0287701	1	DOWN
Lsm11	-0.654022	0.0287772	1	DOWN
Zfp239	-3.19613	0.0288402	1	DOWN
Kank4	-1.37484	0.0290334	1	DOWN
Rhbdd2	-1.12505	0.0291088	1	DOWN
Colca2	2.33072	0.0291861	1	UP
Ubox5	0.497772	0.0291889	1	UP
Noct	0.455068	0.0292395	1	UP
Akr1c6	3.49333	0.0292521	1	UP
Ccdc89	-3.20765	0.0293279	1	DOWN
Arhgef19	-1.58251	0.0293583	1	DOWN
Lmbrd1	0.317197	0.0293584	1	UP
Zfp219	-0.581754	0.0293812	1	DOWN
Rrnad1	2.72829	0.0293969	1	UP
Tlr6	1.24269	0.0296481	1	UP
Tcf23	-1.35756	0.0297518	1	DOWN
Gm36368	2.04762	0.0297846	1	UP
Gm8206	2.87844	0.0298146	1	UP
Slc2a9	2.22083	0.0300125	1	UP
1110008P14Rik	-0.683955	0.0300273	1	DOWN
Mapk8ip1	-0.862792	0.0301976	1	DOWN
Atoh8	-1.09933	0.0303702	1	DOWN
Kat2a	-1.45016	0.0304939	1	DOWN
Bbs2	0.572097	0.030738	1	UP
Mpdu1	0.718661	0.0308968	1	UP
Hdac8	0.639232	0.0309442	1	UP
Slx4	-2.20236	0.0314054	1	DOWN
Aqp11	1.29511	0.0317608	1	UP
Slc25a17	0.483305	0.0317632	1	UP
Chtf18	-2.51389	0.0317853	1	DOWN
Epc1	-0.308363	0.0318684	1	DOWN
St14	3.51581	0.0319084	1	UP
Serpina1c	2.05233	0.0322873	1	UP
Rpl39	0.279007	0.0323051	1	UP
Mkrn1	0.357032	0.0325123	1	UP
Fbxo15	-3.19674	0.0327076	1	DOWN
Gm8797	-2.61726	0.0328152	1	DOWN
Ece2	3.40626	0.0330694	1	UP
Mup21	2.97872	0.0331991	1	UP
Vmn1r184	2.98371	0.0333808	1	UP
Lsm1	-0.441996	0.0334384	1	DOWN
[truncated: 21,459 more rows]

## Sheet: Adipose (24h)
Gene name	L2FC	P-VALUE	P-ADJ	DIRECTION
[truncated: 21,838 more rows]

[truncated: 1 more sheets: Adipose (6h)]
