# Supplementary material for: Integrative transcriptomic analysis of tissue-specific metabolic crosstalk after myocardial infarction
Source: eLife journal article supplement (doi:10.7554/elife.66921), 2021-05-10
Supplement: supp [file elife-66921-supp-v1.zip › elife_poa_e66921_Supplementary_file_7.xlsx]

## Sheet: Input for mouse model ChowDiet
Nutrients	gram/100 gr	gram/day	g/mol	mmol	EXCHANGE RXN ID	EQUATION	UB	LB
Crude Protein	16.4	Consume 4.5 gram per day (15g/100g body weight for a 30 gram mouse)
Aspartate	1	0.045	133.11	0.338066	intestine_EX_1	<=> aspartate[s]	0.338066	0
Glutamate	3.3	0.1485	147.129	1.00932	intestine_EX_2	<=> glutamate[s]	1.00932	0
Alanine	0.9	0.0405	89.0932	0.45458	intestine_EX_3	<=> alanine[s]	0.45458	0
Glycine	0.7	0.0315	75.0666	0.419627	intestine_EX_4	<=> glycine[s]	0.419627	0
Threonine	0.6	0.027	119.119	0.226664	intestine_EX_5	=> threonine[s]	0.226664	0
Proline	1.5	0.0675	115.13	0.586291	intestine_EX_6	<=> proline[s]	0.586291	0
Serine	0.8	0.036	105.093	0.342555	intestine_EX_7	<=> serine[s]	0.342555	0
Leucine	1.9	0.0855	131.173	0.651811	intestine_EX_8	=> leucine[s]	0.651811	0
Isoleucine	0.7	0.0315	131.173	0.240141	intestine_EX_9	=> isoleucine[s]	0.240141	0
Valine	0.8	0.036	117.146	0.307308	intestine_EX_10	=> valine[s]	0.307308	0
Phenylalanine	0.9	0.0405	165.189	0.245174	intestine_EX_11	=> phenylalanine[s]	0.245174	0
Tyrosine	0.5	0.0225	181.189	0.12418	intestine_EX_12	<=> tyrosine[s]	0.12418	0
Methionine	0.3	0.0135	149.211	0.0904757	intestine_EX_13	=> methionine[s]	0.0904757	0
Cystine	0.3	0.0135	240.3	0.0561797	intestine_EX_14	<=> cystine[s]	0.0561797	0
Lysine	0.8	0.036	146.188	0.246259	intestine_EX_15	=> lysine[s]	0.246259	0
Histidine	0.4	0.018	155.155	0.116013	intestine_EX_16	=> histidine[s]	0.116013	0
Arginine	0.8	0.036	174.201	0.206658	intestine_EX_17	<=> arginine[s]	0.206658	0
Tryptophan	0.2	0.009	204.225	0.044069	intestine_EX_18	=> tryptophan[s]	0.044069	0
Fat	4
Palmitate	0.5	0.0225	256.43	0.0877432	intestine_EX_19	=> palmitate[c]	0.0877432	0
Stearate	0.1	0.0045	284.484	0.0158181	intestine_EX_20	=> stearate[s]	0.0158181	0
Oleate	0.7	0.0315	282.468	0.111517	intestine_EX_21	=> oleate[s]	0.111517	0
Linoleate	2	0.09	280.452	0.320911	intestine_EX_22	=> linoleate[s]	0.320911	0
Linoleneate	0.1	0.0045	278.43	0.0161621	intestine_EX_23	=> linolenate[s]	0.0161621	0
Cholesterol	0	0	386.654	0	intestine_EX_24	<=> cholesterol[s]	0	0
Others	0.6	0.027	300	0.09	intestine_EX_25	<=> NEFA blood pool in[s]	0.09	0
Carbohydrate	48.5
Starch	48.5	2.1825	1801.52	1.21148	intestine_EX_26	<=> starch structure 1[s]	1.21148	0
VITAMINS
Vitamin A	-	-	-	-	intestine_EX_27	<=> retinoate[s]	0.0001	0
Vitamin D3	-	-	-	-	intestine_EX_28	<=> vitamin D3[s]	0.0001	0
Vitamin E	-	-	-	-	intestine_EX_29	<=> alpha-tocotrienol[s]	0.0001	0
Vitamin K	-	-	-	-	intestine_EX_30	=> vitamin K[c]	0.0001	0
Vitamin B1	-	-	-	-	intestine_EX_31	=> thiamin[s]	0.0001	0
Vitamin B2	-	-	-	-	intestine_EX_32	<=> riboflavin[s]	0.0001	0
Niacin	-	-	-	-	intestine_EX_33	<=> nicotinamide[s]	0.0001	0
Vitamin B6	-	-	-	-	intestine_EX_34	<=> pyridoxine[s]	0.0001	0
Panthothenic acid	-	-	-	-	intestine_EX_35	<=> pantothenate[s]	0.0001	0
Vitamin B12	-	-	-	-	-	-	-	-
Biotin	-	-	-	-	intestine_EX_36	<=> biotin[s]	0.0001	0
Folic acid	-	-	-	-	intestine_EX_37	<=> folate[s]	0.0001	0
Choline	-	-	-	-	intestine_EX_38	<=> choline[s]	0.0001	0
MINERALS
Calcium	-	-	-	-	intestine_EX_39	<=> Ca2+[s]	1000	0
Phosphorus	-	-	-	-	intestine_EX_40	<=> Pi[s]	1000	0
Phosphorus (Non Phytate)	-	-	-	-	-	-	-	-
Sodium	-	-	-	-	intestine_EX_41	<=> Na+[s]	1000	0
Potassium	-	-	-	-	intestine_EX_42	<=> K+[s]	1000	0
Chloride	-	-	-	-	intestine_EX_43	<=> chloride[s]	1000	0
Magnesium	-	-	-	-	intestine_EX_44	<=> Mg2+[s]	1000	0
Zinc	-	-	-	-	intestine_EX_45	<=> zinc[s]	1000	0
Manganese	-	-	-	-	-	-	-	-
Copper	-	-	-	-	intestine_EX_46	<=> Cu2+[s]	1000	0
Iodine	-	-	-	-	intestine_EX_47	<=> iodine[c]	1000	0
Iron	-	-	-	-	intestine_EX_48	<=> Fe2+[s]	1000	0
Selenium	-	-	-	-	-	-	-	-
Others
Water	-	-	-	-	intestine_EX_49	=> H2O[s]	1000	0

## Sheet: Energy Expenditure
Tissues	REEM (kcal/kg/day)	% of body weight	body weight (g)	REEM (kcal/day)	REEM (mmol ATP/day)	Tissue specific REEM RXN ID	UB	LB
Liver	1747.3	6.2	30	3.25	262.518	m1_Resting_energy_expenditure	10000	262.518
Muscle	78.9	34.23	30	0.81	65.446	m2_Resting_energy_expenditure	10000	65.446
Adipose	100	10.33	30	0.31	25.032	m3_Resting_energy_expenditure	10000	25.032
GI tract	52.8	8.83	30	0.14	11.298	m4_Resting_energy_expenditure	10000	11.298
Heart	1352.9	0.57	30	0.23	18.687	m5_Resting_energy_expenditure	10000	18.687
Others	-	-	-	1.5	121.163	Energy2others	10000	121.163

## Sheet: RMetD2 Results (FBA)
Rxns	Eqns	Flux_SHAM	Flux_MI	FluxTotal	fluxFCs	FluxChanged	Subsystems	DEGs
'm1_HMR_4394'	'm1_ATP[m1_c] + m1_glucose[m1_c] => m1_ADP[m1_c] + m1_glucose-6-phosphate[m1_c]'	0	0	0	NaN	NaN	'm1_Glycolysis / Gluconeogenesis'	'm1_Adpgk(lgFC:0.12775FDR:0.96306) or m1_Gck(lgFC:-0.49366FDR:0.74686) or m1_Hk1(lgFC:-0.13604FDR:0.99256) or m1_Hk2(lgFC:-0.74271FDR:0.48207) or m1_Hk3(lgFC:-1.4714FDR:0.61669)'
'm1_HMR_4521'	'm1_glucose-6-phosphate[m1_r] + m1_H2O[m1_r] => m1_glucose[m1_r] + m1_Pi[m1_r]'	1.02562	1.04552	2.07115	1.13047	1.15943	'm1_Glycolysis / Gluconeogenesis'	'm1_G6pc(lgFC:0.51196FDR:0.91113) or m1_G6pc3(lgFC:0.43788FDR:0.37093)'
'm1_HMR_4381'	'm1_glucose-6-phosphate[m1_c] <=> m1_fructose-6-phosphate[m1_c]'	-1.01204	-1.00398	2.01601	0.99204	-1.00398	'm1_Glycolysis / Gluconeogenesis'	'm1_Gpi1(lgFC:-0.11405FDR:0.89527)'
'm1_HMR_4379'	'm1_ATP[m1_c] + m1_fructose-6-phosphate[m1_c] => m1_ADP[m1_c] + m1_fructose-1,6-bisphosphate[m1_c]'	1	0	1	NaN	6.46483e+06	'm1_Glycolysis / Gluconeogenesis'	'm1_1810043G02Rik(lgFC:-0.12649FDR:0.95616) or m1_Pfkl(lgFC:-0.44029FDR:0.37676) or m1_Pfkm(lgFC:22.5046FDR:1.6085e-27) or m1_Pfkp(lgFC:-1.1853FDR:0.17038)'
'm1_HMR_4301'	'm1_fructose-6-phosphate[m1_c] + m1_UTP[m1_c] => m1_fructose-1,6-bisphosphate[m1_c] + m1_UDP[m1_c]'	4.34568	4.17367	8.51935	1.48765e+06	1.48765e+06	'm1_Glycolysis / Gluconeogenesis'	'm1_1810043G02Rik(lgFC:-0.12649FDR:0.95616) or m1_Pfkl(lgFC:-0.44029FDR:0.37676) or m1_Pfkm(lgFC:22.5046FDR:1.6085e-27) or m1_Pfkp(lgFC:-1.1853FDR:0.17038)'
'm1_HMR_4377'	'm1_fructose-1,6-bisphosphate[m1_c] + m1_H2O[m1_c] => m1_fructose-6-phosphate[m1_c] + m1_Pi[m1_c]'	1	0	1	NaN	3.39029	'm1_Glycolysis / Gluconeogenesis'	'm1_Fbp1(lgFC:0.15737FDR:1) or m1_Fbp2(lgFC:2.827FDR:0.21578)'
'm1_HMR_4375'	'm1_fructose-1,6-bisphosphate[m1_c] <=> m1_DHAP[m1_c] + m1_GAP[m1_c]'	4.34568	4.17367	8.51935	0.998591	4.33955	'm1_Glycolysis / Gluconeogenesis'	'm1_Aldoa(lgFC:0.01694FDR:1) or m1_Aldob(lgFC:0.27821FDR:0.98475) or m1_Aldoc(lgFC:-0.48849FDR:0.97399)'
'm1_HMR_4391'	'm1_DHAP[m1_c] <=> m1_GAP[m1_c]'	4.32273	4.17367	8.49639	1	4.32273	'm1_Glycolysis / Gluconeogenesis'	'm1_Tpi1(lgFC:0.040814FDR:1)'
'm1_HMR_4373'	'm1_GAP[m1_c] + m1_NAD+[m1_c] + m1_Pi[m1_c] <=> m1_1,3-bisphospho-D-glycerate[m1_c] + m1_H+[m1_c] + m1_NADH[m1_c]'	8.66841	8.74704	17.4154	1.00907	8.74704	'm1_Glycolysis / Gluconeogenesis'	'm1_Gapdh(lgFC:0.024914FDR:1) or m1_Gapdhs(lgFC:0.37618FDR:0.9391)'
'm1_HMR_4368'	'm1_1,3-bisphospho-D-glycerate[m1_c] + m1_ADP[m1_c] <=> m1_3-phospho-D-glycerate[m1_c] + m1_ATP[m1_c]'	8.66841	8.74704	17.4154	0.974879	8.45064	'm1_Glycolysis / Gluconeogenesis'	'm1_Mia3(lgFC:-0.23784FDR:0.66865) or m1_Pgk1(lgFC:0.04694FDR:0.99644)'
'm1_HMR_4370'	'm1_1,3-bisphospho-D-glycerate[m1_c] + m1_H2O[m1_c] => m1_3-phospho-D-glycerate[m1_c] + m1_Pi[m1_c]'	0	0	0	NaN	NaN	'm1_Glycolysis / Gluconeogenesis'	'm1_Acyp1(lgFC:-0.14597FDR:0.92085) or m1_Acyp2(lgFC:-0.15399FDR:0.99013)'
'm1_HMR_4371'	'm1_1,3-bisphospho-D-glycerate[m1_c] => m1_2,3-bisphospho-D-glycerate[m1_c]'	0	0	0	NaN	NaN	'm1_Glycolysis / Gluconeogenesis'	'm1_Bpgm(lgFC:0.085447FDR:0.97959) or m1_Pgam1(lgFC:0.01891FDR:1) or m1_Pgam2(lgFC:-0.13124FDR:1)'
'm1_HMR_4372'	'm1_2,3-bisphospho-D-glycerate[m1_c] + m1_H2O[m1_c] => m1_3-phospho-D-glycerate[m1_c] + m1_Pi[m1_c]'	0	0	0	NaN	NaN	'm1_Glycolysis / Gluconeogenesis'	'm1_Bpgm(lgFC:0.085447FDR:0.97959)'
'm1_HMR_4365'	'm1_3-phospho-D-glycerate[m1_c] <=> m1_2-phospho-D-glycerate[m1_c]'	8.66841	8.672	17.3404	1.00042	8.672	'm1_Glycolysis / Gluconeogenesis'	'm1_Bpgm(lgFC:0.085447FDR:0.97959) or m1_Pgam1(lgFC:0.01891FDR:1) or m1_Pgam2(lgFC:-0.13124FDR:1)'
'm1_HMR_4363'	'm1_2-phospho-D-glycerate[m1_c] <=> m1_H2O[m1_c] + m1_PEP[m1_c]'	8.66841	8.672	17.3404	1.34243	11.6367	'm1_Glycolysis / Gluconeogenesis'	'm1_Eno2(lgFC:1.5396FDR:0.65923) or m1_Eno3(lgFC:0.23818FDR:0.80522)'
'm1_HMR_4358'	'm1_ADP[m1_c] + m1_PEP[m1_c] => m1_ATP[m1_c] + m1_pyruvate[m1_c]'	4.29389	3.45203	7.74592	0.803941	6.92664	'm1_Glycolysis / Gluconeogenesis'	'm1_Pklr(lgFC:-0.38127FDR:1) or m1_Pkm(lgFC:-0.7323FDR:0.014919)'
'm1_HMR_4210'	'm1_PEP[m1_c] + m1_UDP[m1_c] => m1_pyruvate[m1_c] + m1_UTP[m1_c]'	4.35753	3.5032	7.86073	0.803941	0.0190636	'm1_Glycolysis / Gluconeogenesis'	'm1_Pklr(lgFC:-0.38127FDR:1) or m1_Pkm(lgFC:-0.7323FDR:0.014919)'
'm1_HMR_4193'	'm1_CDP[m1_c] + m1_PEP[m1_c] => m1_CTP[m1_c] + m1_pyruvate[m1_c]'	0.0169833	0.0136535	0.0306368	NaN	0.0136535	'm1_Glycolysis / Gluconeogenesis'	'm1_Pklr(lgFC:-0.38127FDR:1) or m1_Pkm(lgFC:-0.7323FDR:0.014919)'
'm1_HMR_4171'	'm1_GDP[m1_c] + m1_PEP[m1_c] => m1_GTP[m1_c] + m1_pyruvate[m1_c]'	0	0	0	0.803941	0.00953181	'm1_Glycolysis / Gluconeogenesis'	'm1_Pklr(lgFC:-0.38127FDR:1) or m1_Pkm(lgFC:-0.7323FDR:0.014919)'
'm1_HMR_4421'	'm1_dADP[m1_c] + m1_PEP[m1_c] => m1_dATP[m1_c] + m1_pyruvate[m1_c]'	0	0	0	NaN	0	'm1_Glycolysis / Gluconeogenesis'	'm1_Pklr(lgFC:-0.38127FDR:1) or m1_Pkm(lgFC:-0.7323FDR:0.014919)'
'm1_HMR_4573'	'm1_dGDP[m1_c] + m1_PEP[m1_c] => m1_dGTP[m1_c] + m1_pyruvate[m1_c]'	0	0	0	NaN	0	'm1_Glycolysis / Gluconeogenesis'	'm1_Pklr(lgFC:-0.38127FDR:1) or m1_Pkm(lgFC:-0.7323FDR:0.014919)'
'm1_HMR_6627'	'm1_dTDP[m1_c] + m1_PEP[m1_c] => m1_dTTP[m1_c] + m1_pyruvate[m1_c]'	0	1.70312	1.70312	NaN	0	'm1_Glycolysis / Gluconeogenesis'	'm1_Pklr(lgFC:-0.38127FDR:1) or m1_Pkm(lgFC:-0.7323FDR:0.014919)'
'm1_HMR_4362'	'm1_ATP[m1_c] + m1_H2O[m1_c] + m1_pyruvate[m1_c] => m1_AMP[m1_c] + m1_PEP[m1_c] + m1_Pi[m1_c]'	0	0	0	NaN	NaN	'm1_Glycolysis / Gluconeogenesis'	''
'm1_HMR_4388'	'm1_H+[m1_c] + m1_NADH[m1_c] + m1_pyruvate[m1_c] <=> m1_L-lactate[m1_c] + m1_NAD+[m1_c]'	-2.73891	-2.73623	5.47515	0.99902	-2.81024	'm1_Glycolysis / Gluconeogenesis'	'm1_Htt(lgFC:-0.085968FDR:0.96613) or m1_Ldhb(lgFC:0.00079359FDR:1)'
'm1_HMR_4280'	'm1_H+[m1_m] + m1_NADH[m1_m] + m1_pyruvate[m1_m] => m1_L-lactate[m1_m] + m1_NAD+[m1_m]'	0	0.275821	0.275821	NaN	NaN	'm1_Pyruvate metabolism'	'm1_Ldha(lgFC:0.35865FDR:0.63023)'
'm1_HMR_4137'	'm1_CoA[m1_m] + m1_NAD+[m1_m] + m1_pyruvate[m1_m] => m1_acetyl-CoA[m1_m] + m1_CO2[m1_m] + m1_H+[m1_m] + m1_NADH[m1_m]'	15.1728	15.3808	30.5536	1.01371	15.2962	'm1_Glycolysis / Gluconeogenesis'	'm1_Dlat(lgFC:-0.0065961FDR:1) or m1_Dld(lgFC:0.17181FDR:0.86538) or m1_Pdha1(lgFC:0.18289FDR:0.79852) or m1_Pdhb(lgFC:-0.05162FDR:1) or m1_Pdhx(lgFC:0.19811FDR:0.83486)'
'm1_HMR_3905'	'm1_ethanol[m1_c] + m1_NAD+[m1_c] => m1_acetaldehyde[m1_c] + m1_H+[m1_c] + m1_NADH[m1_c]'	0	0	0	NaN	NaN	'm1_Glycolysis / Gluconeogenesis'	'm1_Adh1(lgFC:-0.71411FDR:0.44374) or m1_Adh4(lgFC:-0.57187FDR:0.3751) or m1_Adh5(lgFC:-0.021378FDR:1) or m1_Adh7(lgFC:0.0061505FDR:1) or m1_Adhfe1(lgFC:0.17131FDR:0.97231) or m1_Zadh2(lgFC:0.061001FDR:0.9879)'
'm1_HMR_3907'	'm1_ethanol[m1_c] + m1_NADP+[m1_c] => m1_acetaldehyde[m1_c] + m1_H+[m1_c] + m1_NADPH[m1_c]'	0	0	0	NaN	NaN	'm1_Glycolysis / Gluconeogenesis'	'm1_Akr1a1(lgFC:-0.09256FDR:0.95799)'
'm1_HMR_8360'	'm1_ethanol[m1_p] + m1_H2O2[m1_p] => m1_acetaldehyde[m1_p] + 2 m1_H2O[m1_p]'	0	0	0	NaN	NaN	'm1_Glycolysis / Gluconeogenesis'	'm1_Cat(lgFC:0.090213FDR:1)'
'm1_HMR_4097'	'm1_acetate[m1_c] + m1_ATP[m1_c] + m1_CoA[m1_c] => m1_acetyl-CoA[m1_c] + m1_AMP[m1_c] + m1_PPi[m1_c]'	0	0	0	NaN	0	'm1_Glycolysis / Gluconeogenesis'	'm1_Acss2(lgFC:-0.87472FDR:0.16284)'
'm1_HMR_4099'	'm1_acetate[m1_m] + m1_ATP[m1_m] + m1_CoA[m1_m] => m1_acetyl-CoA[m1_m] + m1_AMP[m1_m] + m1_PPi[m1_m]'	0.0366655	0	0.0366655	1.49089	0.0546643	'm1_Glycolysis / Gluconeogenesis'	'm1_Acss1(lgFC:-0.67372FDR:0.86693) or m1_Acss3(lgFC:1.103FDR:0.10155)'
'm1_HMR_4133'	'm1_acetate[m1_c] + m1_ATP[m1_c] => m1_acetyl adenylate[m1_c] + m1_PPi[m1_c]'	0	0	0	NaN	0	'm1_Glycolysis / Gluconeogenesis'	'm1_Acss2(lgFC:-0.87472FDR:0.16284)'
'm1_HMR_9840'	'm1_acetate[m1_m] + m1_ATP[m1_m] => m1_acetyl adenylate[m1_m] + m1_PPi[m1_m]'	1	0.00609822	1.0061	NaN	1.49089	'm1_Glycolysis / Gluconeogenesis'	'm1_Acss1(lgFC:-0.67372FDR:0.86693) or m1_Acss3(lgFC:1.103FDR:0.10155)'
'm1_HMR_4108'	'm1_acetyl adenylate[m1_c] + m1_CoA[m1_c] => m1_acetyl-CoA[m1_c] + m1_AMP[m1_c]'	0	0	0	NaN	0	'm1_Glycolysis / Gluconeogenesis'	'm1_Acss2(lgFC:-0.87472FDR:0.16284)'
'm1_HMR_9839'	'm1_acetyl adenylate[m1_m] + m1_CoA[m1_m] => m1_acetyl-CoA[m1_m] + m1_AMP[m1_m]'	1	0.00609822	1.0061	NaN	1.49089	'm1_Glycolysis / Gluconeogenesis'	'm1_Acss1(lgFC:-0.67372FDR:0.86693) or m1_Acss3(lgFC:1.103FDR:0.10155)'
'm1_HMR_4283'	'm1_acetaldehyde[m1_c] + m1_H2O[m1_c] + m1_NADP+[m1_c] <=> m1_acetate[m1_c] + m1_H+[m1_c] + m1_NADPH[m1_c]'	1	0.00609822	1.0061	1.20652	1.20652	'm1_Glycolysis / Gluconeogenesis'	'm1_Aldh1a3(lgFC:1.087FDR:0.44812) or m1_Aldh3b1(lgFC:-0.15805FDR:0.99096)'
'm1_HMR_8357'	'm1_acetaldehyde[m1_m] + m1_H2O[m1_m] + m1_NAD+[m1_m] => m1_acetate[m1_m] + m1_H+[m1_m] + m1_NADH[m1_m]'	0.0366655	0	0.0366655	0.983228	0.0360506	'm1_Glycolysis / Gluconeogenesis'	'm1_Aldh1b1(lgFC:-0.28921FDR:0.73037) or m1_Aldh2(lgFC:-0.029657FDR:1) or m1_Aldh3a2(lgFC:-0.10108FDR:1) or m1_Aldh7a1(lgFC:-0.19043FDR:0.71271) or m1_Aldh9a1(lgFC:0.08386FDR:0.98923)'
'm1_HMR_4360'	'm1_H2O[m1_c] + m1_methylglyoxal[m1_c] + m1_NADP+[m1_c] => m1_H+[m1_c] + m1_NADPH[m1_c] + m1_pyruvate[m1_c]'	0	0	0	NaN	NaN	'm1_Glycolysis / Gluconeogenesis'	'm1_Zadh2(lgFC:0.061001FDR:0.9879)'
'm1_HMR_6410'	'm1_lipoamide[m1_m] + m1_pyruvate[m1_m] => m1_CO2[m1_m] + m1_S-acetyldihydrolipoamide[m1_m]'	0	0.126222	0.126222	NaN	NaN	'm1_Glycolysis / Gluconeogenesis'	'm1_Pdha1(lgFC:0.18289FDR:0.79852) or m1_Pdhb(lgFC:-0.05162FDR:1)'
'm1_HMR_6412'	'm1_CoA[m1_m] + m1_S-acetyldihydrolipoamide[m1_m] => m1_acetyl-CoA[m1_m] + m1_dihydrolipoamide[m1_m]'	0	0.126222	0.126222	NaN	NaN	'm1_Glycolysis / Gluconeogenesis'	'm1_Dlat(lgFC:-0.0065961FDR:1)'
'm1_HMR_4396'	'm1_glucose-1-phosphate[m1_c] <=> m1_glucose-6-phosphate[m1_c]'	0	0	0	NaN	NaN	'm1_Glycolysis / Gluconeogenesis'	'm1_Pgm1(lgFC:0.015044FDR:1) or m1_Pgm2(lgFC:0.18973FDR:0.91489) or m1_Pgm5(lgFC:-1.1113FDR:0.44812)'
'm1_HMR_8652'	'm1_carbamoyl-phosphate[m1_r] + m1_glucose[m1_r] => m1_CO2[m1_r] + m1_glucose-6-phosphate[m1_r] + m1_NH3[m1_r]'	0	0	0	NaN	NaN	'm1_Glycolysis / Gluconeogenesis'	'm1_G6pc(lgFC:0.51196FDR:0.91113) or m1_G6pc3(lgFC:0.43788FDR:0.37093)'
'm1_HMR_7745'	'm1_beta-D-glucose[m1_c] <=> m1_glucose[m1_c]'	0	0	0	NaN	NaN	'm1_Glycolysis / Gluconeogenesis'	'm1_Galm(lgFC:-0.3995FDR:0.49625)'
'm1_HMR_7746'	'm1_ATP[m1_c] + m1_beta-D-glucose[m1_c] => m1_ADP[m1_c] + m1_beta-D-glucose-6-phosphate[m1_c]'	0	0	0	NaN	NaN	'm1_Glycolysis / Gluconeogenesis'	'm1_Gck(lgFC:-0.49366FDR:0.74686) or m1_Hk1(lgFC:-0.13604FDR:0.99256) or m1_Hk2(lgFC:-0.74271FDR:0.48207) or m1_Hk3(lgFC:-1.4714FDR:0.61669)'
'm1_HMR_7747'	'm1_ADP[m1_c] + m1_beta-D-glucose[m1_c] => m1_AMP[m1_c] + m1_beta-D-glucose-6-phosphate[m1_c]'	0	0	0	NaN	NaN	'm1_Glycolysis / Gluconeogenesis'	'm1_Adpgk(lgFC:0.12775FDR:0.96306)'
'm1_HMR_7748'	'm1_beta-D-glucose-6-phosphate[m1_c] <=> m1_glucose-6-phosphate[m1_c]'	0	0.168396	0.168396	NaN	NaN	'm1_Glycolysis / Gluconeogenesis'	'm1_Gpi1(lgFC:-0.11405FDR:0.89527)'
'm1_HMR_7749'	'm1_beta-D-glucose-6-phosphate[m1_c] <=> m1_fructose-6-phosphate[m1_c]'	0	-0.168396	0.168396	NaN	NaN	'm1_Glycolysis / Gluconeogenesis'	'm1_Gpi1(lgFC:-0.11405FDR:0.89527)'
'm1_HMR_4101'	'm1_GTP[m1_c] + m1_OAA[m1_c] => m1_CO2[m1_c] + m1_GDP[m1_c] + m1_PEP[m1_c]'	0	0	0	NaN	NaN	'm1_Pyruvate metabolism'	'm1_Pck1(lgFC:0.1963FDR:1)'
'm1_HMR_4103'	'm1_GTP[m1_m] + m1_OAA[m1_m] => m1_CO2[m1_m] + m1_GDP[m1_m] + m1_PEP[m1_m]'	0	0	0	NaN	NaN	'm1_Pyruvate metabolism'	'm1_Pck2(lgFC:-0.51519FDR:0.70234)'
'm1_HMR_3989'	'm1_H2O[m1_s] + m1_maltose[m1_s] => 2 m1_glucose[m1_s]'	1.2115	1.20155	2.41305	0.841254	1.01918	'm1_Starch and sucrose metabolism'	'm1_Capn3(lgFC:-1.2076FDR:0.28259) or m1_Gaa(lgFC:-0.22917FDR:0.47235) or m1_Ganc(lgFC:0.15317FDR:0.92821)'
'm1_HMR_4122'	'm1_H2O[m1_c] + 2 m1_NAD+[m1_c] + m1_UDP-glucose[m1_c] => 2 m1_H+[m1_c] + 2 m1_NADH[m1_c] + m1_UDP-glucuronate[m1_c]'	0	0	0	NaN	NaN	'm1_Starch and sucrose metabolism'	'm1_Ugdh(lgFC:-0.27408FDR:0.78632)'
'm1_HMR_4837'	'm1_H2O[m1_s] + m1_trehalose[m1_s] => 2 m1_glucose[m1_s]'	1	0	1	NaN	2.2094	'm1_Starch and sucrose metabolism'	'm1_Treh(lgFC:1.7935FDR:0.50968)'
'm1_HMR_5395'	'm1_glycogenin[m1_c] + 8 m1_UDP-glucose[m1_c] => m1_glycogenin G8[m1_c] + 8 m1_UDP[m1_c]'	0	0	0	NaN	NaN	'm1_Starch and sucrose metabolism'	'm1_Gyg(lgFC:-0.15739FDR:0.94867)'
'm1_HMR_5396'	'm1_glycogenin G8[m1_c] + 3 m1_UDP-glucose[m1_c] => m1_glycogenin G11[m1_c] + 3 m1_UDP[m1_c]'	0	0	0	NaN	NaN	'm1_Starch and sucrose metabolism'	'm1_Gyg(lgFC:-0.15739FDR:0.94867) or m1_Gys1(lgFC:-0.36826FDR:0.77907) or m1_Gys2(lgFC:-0.61427FDR:0.82636)'
'm1_HMR_9727'	'm1_UDP-glucose[m1_c] => m1_UDP[m1_c] + m1_glycogen[m1_c]'	0	0	0	NaN	NaN	'm1_Starch and sucrose metabolism'	'm1_Gys1(lgFC:-0.36826FDR:0.77907) or m1_Gys2(lgFC:-0.61427FDR:0.82636) or m1_Ppp1r3b(lgFC:0.42739FDR:0.85864) or m1_Ppp1r3c(lgFC:-0.43322FDR:0.90072)'
'm1_HMR_5397'	'm1_glycogenin G11[m1_c] => m1_glycogenin G4G7[m1_c]'	0	0	0	NaN	0	'm1_Starch and sucrose metabolism'	'm1_Gbe1(lgFC:-0.52306FDR:0.36035)'
'm1_HMR_5398'	'm1_glycogenin G4G7[m1_c] + 3 m1_Pi[m1_c] => 3 m1_glucose-1-phosphate[m1_c] + m1_glycogenin G4G4[m1_c]'	0	0	0	NaN	NaN	'm1_Starch and sucrose metabolism'	'm1_Pygb(lgFC:-0.70918FDR:0.19375) or m1_Pygl(lgFC:-0.40735FDR:0.54104) or m1_Pygm(lgFC:-0.35401FDR:0.99096)'
'm1_HMR_5399'	'm1_glycogenin G4G4[m1_c] => m1_glycogenin G7G1[m1_c]'	0	0	0	NaN	NaN	'm1_Starch and sucrose metabolism'	'm1_Agl(lgFC:-0.30477FDR:0.5147)'
'm1_HMR_5400'	'm1_glycogenin G7G1[m1_c] + m1_H2O[m1_c] => m1_glucose[m1_c] + m1_glycogenin G7[m1_c]'	0	0	0	NaN	NaN	'm1_Starch and sucrose metabolism'	'm1_Agl(lgFC:-0.30477FDR:0.5147)'
'm1_HMR_5401'	'm1_glycogenin G7[m1_c] + 7 m1_Pi[m1_c] => 7 m1_glucose-1-phosphate[m1_c] + m1_glycogenin[m1_c]'	0	0	0	NaN	NaN	'm1_Starch and sucrose metabolism'	'm1_Pygb(lgFC:-0.70918FDR:0.19375) or m1_Pygl(lgFC:-0.40735FDR:0.54104) or m1_Pygm(lgFC:-0.35401FDR:0.99096)'
'm1_HMR_8568'	'm1_H2O[m1_c] + m1_maltodecaose[m1_c] => m1_fructose[m1_c] + m1_maltononaose[m1_c]'	0	0	0	NaN	NaN	'm1_Starch and sucrose metabolism'	'm1_Amy1(lgFC:0.31257FDR:0.80509)'
'm1_HMR_8569'	'm1_H2O[m1_s] + m1_maltodecaose[m1_s] => m1_glucose[m1_s] + m1_maltononaose[m1_s]'	0	0	0	NaN	NaN	'm1_Starch and sucrose metabolism'	'm1_Amy1(lgFC:0.31257FDR:0.80509)'
'm1_HMR_8570'	'2 m1_H2O[m1_c] + m1_maltononaose[m1_c] => 2 m1_fructose[m1_c] + m1_maltoheptaose[m1_c]'	0	0	0	NaN	NaN	'm1_Starch and sucrose metabolism'	'm1_Amy1(lgFC:0.31257FDR:0.80509)'
'm1_HMR_8571'	'2 m1_H2O[m1_s] + m1_maltononaose[m1_s] => 2 m1_glucose[m1_s] + m1_maltoheptaose[m1_s]'	0	0	0	NaN	NaN	'm1_Starch and sucrose metabolism'	'm1_Amy1(lgFC:0.31257FDR:0.80509)'
'm1_HMR_8572'	'm1_H2O[m1_c] + m1_maltoheptaose[m1_c] => m1_fructose[m1_c] + m1_maltohexaose[m1_c]'	0	0	0	NaN	NaN	'm1_Starch and sucrose metabolism'	'm1_Amy1(lgFC:0.31257FDR:0.80509)'
'm1_HMR_8573'	'm1_H2O[m1_s] + m1_maltoheptaose[m1_s] => m1_glucose[m1_s] + m1_maltohexaose[m1_s]'	0	0	0	NaN	NaN	'm1_Starch and sucrose metabolism'	'm1_Amy1(lgFC:0.31257FDR:0.80509)'
'm1_HMR_8574'	'm1_H2O[m1_c] + m1_maltohexaose[m1_c] => m1_fructose[m1_c] + m1_maltopentaose[m1_c]'	0	0	0	NaN	NaN	'm1_Starch and sucrose metabolism'	'm1_Amy1(lgFC:0.31257FDR:0.80509)'
'm1_HMR_8575'	'm1_H2O[m1_s] + m1_maltohexaose[m1_s] => m1_glucose[m1_s] + m1_maltopentaose[m1_s]'	0	0	0	NaN	NaN	'm1_Starch and sucrose metabolism'	'm1_Amy1(lgFC:0.31257FDR:0.80509)'
'm1_HMR_8576'	'm1_H2O[m1_c] + m1_maltopentaose[m1_c] => m1_fructose[m1_c] + m1_maltotetraose[m1_c]'	0	0	0	NaN	NaN	'm1_Starch and sucrose metabolism'	'm1_Amy1(lgFC:0.31257FDR:0.80509)'
'm1_HMR_8577'	'm1_H2O[m1_s] + m1_maltopentaose[m1_s] => m1_glucose[m1_s] + m1_maltotetraose[m1_s]'	0	0	0	NaN	NaN	'm1_Starch and sucrose metabolism'	'm1_Amy1(lgFC:0.31257FDR:0.80509)'
'm1_HMR_8578'	'm1_H2O[m1_c] + m1_maltotetraose[m1_c] => m1_fructose[m1_c] + m1_maltotriose[m1_c]'	0	0	0	NaN	NaN	'm1_Starch and sucrose metabolism'	'm1_Amy1(lgFC:0.31257FDR:0.80509)'
'm1_HMR_8579'	'm1_H2O[m1_s] + m1_maltotetraose[m1_s] => m1_glucose[m1_s] + m1_maltotriose[m1_s]'	0	0	0	NaN	NaN	'm1_Starch and sucrose metabolism'	'm1_Amy1(lgFC:0.31257FDR:0.80509)'
'm1_HMR_8581'	'm1_H2O[m1_s] + m1_maltotriose[m1_s] => m1_glucose[m1_s] + m1_maltose[m1_s]'	0	0	0	NaN	NaN	'm1_Starch and sucrose metabolism'	'm1_Amy1(lgFC:0.31257FDR:0.80509)'
'm1_HMR_8591'	'm1_H2O[m1_c] + m1_maltotriose[m1_c] => m1_glucose[m1_c] + m1_maltose[m1_c]'	0	0	0	NaN	NaN	'm1_Starch and sucrose metabolism'	'm1_Ganc(lgFC:0.15317FDR:0.92821)'
'm1_HMR_8592'	'm1_H2O[m1_l] + m1_maltotriose[m1_l] => m1_glucose[m1_l] + m1_maltose[m1_l]'	0	0	0	NaN	NaN	'm1_Starch and sucrose metabolism'	'm1_Gaa(lgFC:-0.22917FDR:0.47235)'
'm1_HMR_8580'	'm1_H2O[m1_c] + m1_maltotriose[m1_c] => m1_fructose[m1_c] + m1_maltose[m1_c]'	0	0	0	NaN	NaN	'm1_Starch and sucrose metabolism'	'm1_Amy1(lgFC:0.31257FDR:0.80509)'
'm1_HMR_8582'	'm1_H2O[m1_c] + m1_maltose[m1_c] => 2 m1_fructose[m1_c]'	0	0	0	NaN	NaN	'm1_Starch and sucrose metabolism'	'm1_Amy1(lgFC:0.31257FDR:0.80509)'
'm1_HMR_8587'	'm1_H2O[m1_c] + m1_maltose[m1_c] => 2 m1_glucose[m1_c]'	0	0	0	NaN	NaN	'm1_Starch and sucrose metabolism'	'm1_Ganc(lgFC:0.15317FDR:0.92821)'
'm1_HMR_8589'	'm1_H2O[m1_l] + m1_maltose[m1_l] => 2 m1_glucose[m1_l]'	0	0	0	NaN	NaN	'm1_Starch and sucrose metabolism'	'm1_Gaa(lgFC:-0.22917FDR:0.47235)'
'm1_HMR_8584'	'm1_H2O[m1_s] + m1_starch structure 2[m1_s] => m1_glucose[m1_s] + m1_maltose[m1_s]'	1.2115	1.2115	2.423	NaN	NaN	'm1_Starch and sucrose metabolism'	''
'm1_HMR_3944'	'm1_glucose-1-phosphate[m1_c] + m1_UTP[m1_c] => m1_PPi[m1_c] + m1_UDP-glucose[m1_c]'	0	0	0	NaN	NaN	'm1_Galactose metabolism'	'm1_Ugp2(lgFC:-0.22263FDR:0.80337)'
'm1_HMR_4128'	'm1_UDP-galactose[m1_c] <=> m1_UDP-glucose[m1_c]'	0	0	0	NaN	NaN	'm1_Galactose metabolism'	'm1_Gale(lgFC:0.11466FDR:1)'
'm1_HMR_4130'	'm1_ATP[m1_c] + m1_galactose[m1_c] => m1_ADP[m1_c] + m1_alpha-D-galactose-1-phosphate[m1_c]'	0	0	0	NaN	NaN	'm1_Galactose metabolism'	'm1_Galk1(lgFC:0.12908FDR:0.95176) or m1_Galk2(lgFC:-0.33487FDR:0.38193)'
'm1_HMR_4131'	'm1_glucose-1-phosphate[m1_c] + m1_UDP-galactose[m1_c] <=> m1_alpha-D-galactose-1-phosphate[m1_c] + m1_UDP-glucose[m1_c]'	0	0	0	NaN	NaN	'm1_Galactose metabolism'	'm1_Galt(lgFC:-0.19712FDR:0.82872)'
'm1_HMR_4132'	'm1_galactose-1-phosphate[m1_c] + m1_UDP-glucose[m1_c] => m1_glucose-1-phosphate[m1_c] + m1_UDP-galactose[m1_c]'	0	0	0	NaN	NaN	'm1_Galactose metabolism'	'm1_Galt(lgFC:-0.19712FDR:0.82872)'
'm1_HMR_4303'	'm1_H2O[m1_s] + m1_sucrose[m1_s] => m1_fructose[m1_s] + m1_glucose[m1_s]'	0	0	0	NaN	NaN	'm1_Galactose metabolism'	'm1_Gaa(lgFC:-0.22917FDR:0.47235) or m1_Ganc(lgFC:0.15317FDR:0.92821)'
'm1_HMR_4414'	'm1_ATP[m1_c] + m1_galactose[m1_c] => m1_ADP[m1_c] + m1_galactose-1-phosphate[m1_c]'	0	0	0	NaN	NaN	'm1_Galactose metabolism'	'm1_Galk1(lgFC:0.12908FDR:0.95176) or m1_Galk2(lgFC:-0.33487FDR:0.38193)'
'm1_HMR_4415'	'm1_H2O[m1_s] + m1_lactose[m1_s] => m1_galactose[m1_s] + m1_glucose[m1_s]'	0	0	0	NaN	NaN	'm1_Galactose metabolism'	'm1_Glb1(lgFC:-0.30261FDR:0.80209) or m1_Glb1l(lgFC:-2.4376FDR:0.79794)'
'm1_HMR_4416'	'm1_galactosylglycerol[m1_s] + m1_H2O[m1_s] => m1_galactose[m1_s] + m1_glycerol[m1_s]'	0	0	0	NaN	NaN	'm1_Galactose metabolism'	'm1_Gla(lgFC:-0.15626FDR:0.96126) or m1_Glb1(lgFC:-0.30261FDR:0.80209)'
'm1_HMR_4831'	'm1_lactose[m1_s] + m1_NAD+[m1_s] => m1_3-ketolactose[m1_s] + m1_H+[m1_s] + m1_NADH[m1_s]'	0	0	0	NaN	NaN	'm1_Galactose metabolism'	''
'm1_HMR_4832'	'm1_3-ketolactose[m1_s] + m1_H2O[m1_s] => m1_3-keto-beta-D-galactose[m1_s] + m1_glucose[m1_s]'	0	0	0	NaN	NaN	'm1_Galactose metabolism'	'm1_Glb1(lgFC:-0.30261FDR:0.80209) or m1_Glb1l(lgFC:-2.4376FDR:0.79794)'
'm1_HMR_7674'	'm1_glucose[m1_g] + m1_UDP-galactose[m1_g] => m1_lactose[m1_g] + m1_UDP[m1_g]'	0	0	0	NaN	NaN	'm1_Galactose metabolism'	'm1_B4galt1(lgFC:0.30246FDR:0.69923) or m1_B4galt2(lgFC:-1.5645FDR:0.50968)'
'm1_HMR_8761'	'm1_ATP[m1_c] + m1_D-tagatose[m1_c] => m1_ADP[m1_c] + m1_D-tagatose-6-phosphate[m1_c]'	0	0	0	NaN	NaN	'm1_Galactose metabolism'	'm1_Khk(lgFC:-0.23364FDR:0.86427)'
'm1_HMR_8762'	'm1_D-tagatose-6-phosphate[m1_c] <=> m1_DHAP[m1_c] + m1_glyceraldehyde[m1_c]'	0	0	0	NaN	NaN	'm1_Galactose metabolism'	'm1_Aldoa(lgFC:0.01694FDR:1) or m1_Aldob(lgFC:0.27821FDR:0.98475) or m1_Aldoc(lgFC:-0.48849FDR:0.97399)'
'm1_HMR_8764'	'm1_H2O[m1_l] + m1_lactose[m1_l] => m1_galactose[m1_l] + m1_glucose[m1_l]'	0	0	0	NaN	NaN	'm1_Galactose metabolism'	''
'm1_HMR_8767'	'm1_alpha-D-galactose-1-phosphate[m1_c] + m1_UTP[m1_c] => m1_PPi[m1_c] + m1_UDP-galactose[m1_c]'	0	0	0	NaN	NaN	'm1_Galactose metabolism'	'm1_Galt(lgFC:-0.19712FDR:0.82872)'
'm1_HMR_0454'	'm1_ATP[m1_c] + m1_glyceraldehyde[m1_c] => m1_ADP[m1_c] + m1_GAP[m1_c]'	0	0	0	NaN	NaN	'm1_Fructose and Mannose metabolism'	''
'm1_HMR_4297'	'm1_ATP[m1_c] + m1_fructose-6-phosphate[m1_c] => m1_ADP[m1_c] + m1_fructose-2,6-bisphosphate[m1_c]'	0	0	0	NaN	NaN	'm1_Fructose and mannose metabolism'	'm1_Pfkfb1(lgFC:0.19556FDR:0.9488) or m1_Pfkfb2(lgFC:0.44627FDR:0.61106) or m1_Pfkfb3(lgFC:-1.0542FDR:0.44374) or m1_Pfkfb4(lgFC:-0.081524FDR:1)'
'm1_HMR_4315'	'm1_D-glucitol[m1_c] + m1_NAD+[m1_c] <=> m1_fructose[m1_c] + m1_H+[m1_c] + m1_NADH[m1_c]'	5.35771	4.54664	9.90435	NaN	5.12854	'm1_Fructose and mannose metabolism'	'm1_Sord(lgFC:-0.23659FDR:0.71719)'
'm1_HMR_4316'	'm1_glucose[m1_c] + m1_H+[m1_c] + m1_NADPH[m1_c] => m1_D-glucitol[m1_c] + m1_NADP+[m1_c]'	0	0	0	NaN	NaN	'm1_Fructose and mannose metabolism'	'm1_Akr1b3(lgFC:-0.17747FDR:0.81499) or m1_Akr1b8(lgFC:-0.41868FDR:0.81814)'
'm1_HMR_4319'	'm1_ATP[m1_c] + m1_fructose[m1_c] => m1_ADP[m1_c] + m1_fructose-6-phosphate[m1_c]'	5.35771	4.54664	9.90435	NaN	4.54664	'm1_Fructose and mannose metabolism'	'm1_Hk1(lgFC:-0.13604FDR:0.99256) or m1_Hk2(lgFC:-0.74271FDR:0.48207) or m1_Hk3(lgFC:-1.4714FDR:0.61669)'
'm1_HMR_4383'	'm1_fructose-6-phosphate[m1_c] <=> m1_mannose-6-phosphate[m1_c]'	0	0	0	NaN	NaN	'm1_Fructose and mannose metabolism'	'm1_Mpi(lgFC:0.19001FDR:0.76582)'
'm1_HMR_4385'	'm1_mannose-6-phosphate[m1_c] => m1_mannose-1-phosphate[m1_c]'	0	0	0	NaN	NaN	'm1_Fructose and mannose metabolism'	'm1_Pmm1(lgFC:-0.13266FDR:0.97773) or m1_Pmm2(lgFC:-0.13062FDR:0.75774)'
'm1_HMR_4386'	'm1_GDP[m1_c] + m1_mannose-1-phosphate[m1_c] => m1_GDP-mannose[m1_c] + m1_Pi[m1_c]'	0	0	0	NaN	NaN	'm1_Fructose and mannose metabolism'	'm1_Gmppa(lgFC:0.27941FDR:0.71531) or m1_Gmppb(lgFC:0.60625FDR:0.63602) or m1_Rnf123(lgFC:-0.24098FDR:0.5292)'
'm1_HMR_4387'	'm1_GTP[m1_c] + m1_mannose-1-phosphate[m1_c] => m1_GDP-mannose[m1_c] + m1_PPi[m1_c]'	0	0	0	NaN	NaN	'm1_Fructose and mannose metabolism'	'm1_Gmppa(lgFC:0.27941FDR:0.71531) or m1_Gmppb(lgFC:0.60625FDR:0.63602)'
'm1_HMR_4399'	'm1_GDP-mannose[m1_c] => m1_GDP-4-dehydro-6-deoxy-D-mannose[m1_c] + m1_H2O[m1_c]'	0	0	0	NaN	NaN	'm1_Fructose and mannose metabolism'	'm1_Gmds(lgFC:0.18005FDR:0.93017)'
'm1_HMR_4400'	'm1_GDP-4-dehydro-6-deoxy-D-mannose[m1_c] + m1_H+[m1_c] + m1_NADH[m1_c] => m1_GDP-L-fucose[m1_c] + m1_NAD+[m1_c]'	0	0	0	NaN	NaN	'm1_Fructose and mannose metabolism'	''
'm1_HMR_4401'	'm1_GDP-L-fucose[m1_c] + m1_PPi[m1_c] <=> m1_GTP[m1_c] + m1_L-fucose-1-phosphate[m1_c]'	0	0	0	NaN	NaN	'm1_Fructose and mannose metabolism'	''
'm1_HMR_4402'	'm1_6-deoxy-L-galactose[m1_c] + m1_ATP[m1_c] <=> m1_ADP[m1_c] + m1_L-fucose-1-phosphate[m1_c]'	0	0	0	NaN	NaN	'm1_Fructose and mannose metabolism'	'm1_Fuk(lgFC:-0.10872FDR:1)'
'm1_HMR_4490'	'm1_ATP[m1_c] + m1_mannose[m1_c] => m1_ADP[m1_c] + m1_mannose-6-phosphate[m1_c]'	0	0	0	NaN	NaN	'm1_Fructose and Mannose metabolism'	'm1_Hk1(lgFC:-0.13604FDR:0.99256) or m1_Hk2(lgFC:-0.74271FDR:0.48207) or m1_Hk3(lgFC:-1.4714FDR:0.61669)'
'm1_HMR_4706'	'm1_fructose-2,6-bisphosphate[m1_c] + m1_H2O[m1_c] => m1_fructose-6-phosphate[m1_c] + m1_Pi[m1_c]'	0	0	0	NaN	NaN	'm1_Fructose and Mannose metabolism'	'm1_Pfkfb1(lgFC:0.19556FDR:0.9488) or m1_Pfkfb2(lgFC:0.44627FDR:0.61106) or m1_Pfkfb3(lgFC:-1.0542FDR:0.44374) or m1_Pfkfb4(lgFC:-0.081524FDR:1)'
'm1_HMR_8768'	'm1_GDP-4-dehydro-6-deoxy-D-mannose[m1_c] + m1_H+[m1_c] + m1_NADPH[m1_c] => m1_GDP-L-fucose[m1_c] + m1_NADP+[m1_c]'	0	0	0	NaN	NaN	'm1_Fructose and Mannose metabolism'	''
'm1_HMR_4590'	'm1_H+[m1_c] + m1_L-xylulose[m1_c] + m1_NADPH[m1_c] => m1_NADP+[m1_c] + m1_xylitol[m1_c]'	0	0	0	NaN	NaN	'm1_Pentose and glucuronate interconversions'	'm1_Dcxr(lgFC:0.097864FDR:0.99096)'
'm1_HMR_4591'	'm1_NAD+[m1_c] + m1_xylitol[m1_c] => m1_H+[m1_c] + m1_L-xylulose[m1_c] + m1_NADH[m1_c]'	0	0	0	NaN	NaN	'm1_Pentose and glucuronate interconversions'	'm1_Mecr(lgFC:-0.14819FDR:0.92217) or m1_Pecr(lgFC:-0.072944FDR:0.99256)'
'm1_HMR_4592'	'm1_D-xylose[m1_c] + m1_H+[m1_c] + m1_NADPH[m1_c] <=> m1_NADP+[m1_c] + m1_xylitol[m1_c]'	0	0	0	NaN	NaN	'm1_Pentose and glucuronate interconversions'	'm1_Akr1b3(lgFC:-0.17747FDR:0.81499) or m1_Akr1b8(lgFC:-0.41868FDR:0.81814)'
'm1_HMR_4593'	'm1_NAD+[m1_c] + m1_xylitol[m1_c] => m1_D-xylulose[m1_c] + m1_H+[m1_c] + m1_NADH[m1_c]'	0	0	0	NaN	NaN	'm1_Pentose and glucuronate interconversions'	''
'm1_HMR_4595'	'm1_ADP[m1_c] + m1_D-xylulose-5-phosphate[m1_c] <=> m1_ATP[m1_c] + m1_D-xylulose[m1_c]'	0	0	0	NaN	NaN	'm1_Pentose and glucuronate interconversions'	'm1_Xylb(lgFC:-0.2752FDR:1)'
'm1_HMR_8341'	'm1_H+[m1_c] + m1_L-arabinose[m1_c] + m1_NADPH[m1_c] => m1_L-arabitol[m1_c] + m1_NADP+[m1_c]'	0	0	0	NaN	NaN	'm1_Pentose and glucuronate interconversions'	'm1_Akr1a1(lgFC:-0.09256FDR:0.95799) or m1_Akr1b3(lgFC:-0.17747FDR:0.81499) or m1_Akr7a5(lgFC:-0.12134FDR:0.99186)'
'm1_HMR_8342'	'm1_H+[m1_c] + m1_L-xylulose[m1_c] + m1_NADH[m1_c] <=> m1_L-arabitol[m1_c] + m1_NAD+[m1_c]'	0	0	0	NaN	NaN	'm1_Pentose and glucuronate interconversions'	''
'm1_HMR_8352'	'm1_L-gulonate[m1_c] + m1_NAD+[m1_c] => m1_3-dehydro-L-gulonate[m1_c] + m1_H+[m1_c] + m1_NADH[m1_c]'	0	0	0	NaN	NaN	'm1_Pentose and glucuronate interconversions'	''
'm1_HMR_8353'	'm1_3-dehydro-L-gulonate[m1_c] => m1_CO2[m1_c] + m1_L-xylulose[m1_c]'	0	0	0	NaN	NaN	'm1_Pentose and glucuronate interconversions'	''
'm1_HMR_8726'	'm1_ATP[m1_c] + m1_D-ribulose[m1_c] => m1_ADP[m1_c] + m1_ribulose-5-phosphate[m1_c]'	0	0	0	NaN	NaN	'm1_Pentose and glucuronate interconversions'	'm1_Rbks(lgFC:0.014762FDR:1)'
'm1_HMR_8727'	'm1_H2O[m1_c] + m1_UDP-glucuronate[m1_c] => m1_D-glucuronate 1-phosphate[m1_c] + m1_UMP[m1_c]'	0	0	0	NaN	NaN	'm1_Pentose and glucuronate interconversions'	'm1_Alg5(lgFC:-0.10277FDR:0.88843)'
'm1_HMR_8728'	'm1_D-glucuronate 1-phosphate[m1_c] + m1_H2O[m1_c] => m1_glucuronate[m1_c] + m1_Pi[m1_c]'	0	0	0	NaN	NaN	'm1_Pentose and glucuronate interconversions'	''
'm1_HMR_8729'	'm1_H2O[m1_c] + m1_UDP-glucuronate[m1_c] => m1_glucuronate[m1_c] + m1_UDP[m1_c]'	0	0	0	NaN	NaN	'm1_Pentose and glucuronate interconversions'	'm1_Uxs1(lgFC:0.097037FDR:1)'
'm1_HMR_6537'	'm1_glucuronate[m1_c] + m1_H+[m1_c] + m1_NADPH[m1_c] => m1_L-gulonate[m1_c] + m1_NADP+[m1_c]'	0	0	0	NaN	NaN	'm1_Pentose and glucuronate interconversions'	'm1_Akr1a1(lgFC:-0.09256FDR:0.95799)'
'm1_HMR_1568'	'm1_acetaldehyde[m1_c] + m1_H2O[m1_c] + m1_NAD+[m1_c] => m1_acetate[m1_c] + m1_H+[m1_c] + m1_NADH[m1_c]'	1	0	1	NaN	1.20652	'm1_Pyruvate metabolism'	'm1_Aldh1a3(lgFC:1.087FDR:0.44812) or m1_Aldh3b1(lgFC:-0.15805FDR:0.99096)'
'm1_HMR_3853'	'm1_GSH[m1_c] + m1_methylglyoxal[m1_c] => m1_(R)-S-lactoylglutathione[m1_c]'	0	0	0	NaN	NaN	'm1_Pyruvate metabolism'	'm1_Glo1(lgFC:-0.072057FDR:0.98012) or m1_Glod4(lgFC:-0.20108FDR:0.60505)'
'm1_HMR_3854'	'm1_H+[m1_c] + m1_methylglyoxal[m1_c] + m1_NADH[m1_c] => m1_lactaldehyde[m1_c] + m1_NAD+[m1_c]'	0	0	0	NaN	NaN	'm1_Pyruvate metabolism'	'm1_Akr1b3(lgFC:-0.17747FDR:0.81499) or m1_Akr1b8(lgFC:-0.41868FDR:0.81814)'
'm1_HMR_3855'	'm1_H+[m1_c] + m1_lactaldehyde[m1_c] + m1_NADPH[m1_c] => m1_NADP+[m1_c] + m1_propane-1,2-diol[m1_c]'	0	0	0	NaN	NaN	'm1_Pyruvate metabolism'	'm1_Akr1b3(lgFC:-0.17747FDR:0.81499) or m1_Akr1b8(lgFC:-0.41868FDR:0.81814)'
'm1_HMR_3857'	'm1_(R)-S-lactoylglutathione[m1_c] + m1_H2O[m1_c] => m1_D-lactate[m1_c] + m1_GSH[m1_c]'	0	0	0	NaN	NaN	'm1_Pyruvate metabolism'	'm1_Hagh(lgFC:-0.20005FDR:0.6039) or m1_Haghl(lgFC:0.019233FDR:1)'
'm1_HMR_8511'	'm1_(R)-S-lactoylglutathione[m1_m] + m1_H2O[m1_m] => m1_D-lactate[m1_m] + m1_GSH[m1_m]'	0	0	0	NaN	NaN	'm1_Pyruvate metabolism'	'm1_Hagh(lgFC:-0.20005FDR:0.6039) or m1_Haghl(lgFC:0.019233FDR:1)'
'm1_HMR_3859'	'm1_D-lactate[m1_c] + 2 m1_ferricytochrome C[m1_m] => 2 m1_ferrocytochrome C[m1_m] + 2 m1_H+[m1_c] + m1_pyruvate[m1_c]'	0	0	0	NaN	NaN	'm1_Pyruvate metabolism'	'm1_Ldhd(lgFC:0.080092FDR:1)'
'm1_HMR_4087'	'm1_malate[m1_m] + m1_NAD+[m1_m] => m1_CO2[m1_m] + m1_H+[m1_m] + m1_NADH[m1_m] + m1_pyruvate[m1_m]'	1.46057	0.299023	1.75959	NaN	1.22666	'm1_Pyruvate metabolism'	'm1_Me2(lgFC:-0.55352FDR:0.61075) or m1_Me3(lgFC:0.029863FDR:1)'
'm1_HMR_4089'	'm1_malate[m1_c] + m1_NADP+[m1_c] => m1_CO2[m1_c] + m1_H+[m1_c] + m1_NADPH[m1_c] + m1_pyruvate[m1_c]'	0	0.214005	0.214005	NaN	NaN	'm1_Pyruvate metabolism'	'm1_Me1(lgFC:-0.045992FDR:1)'
'm1_HMR_4091'	'm1_malate[m1_m] + m1_NADP+[m1_m] => m1_CO2[m1_m] + m1_H+[m1_m] + m1_NADPH[m1_m] + m1_pyruvate[m1_m]'	0.00479549	0	0.00479549	NaN	NaN	'm1_Pyruvate metabolism'	'm1_Me2(lgFC:-0.55352FDR:0.61075) or m1_Me3(lgFC:0.029863FDR:1)'
'm1_HMR_4093'	'm1_acetyl-CoA[m1_c] + m1_H2O[m1_c] => m1_acetate[m1_c] + m1_CoA[m1_c]'	0	0	0	NaN	NaN	'm1_Pyruvate metabolism'	'm1_Acot12(lgFC:0.37815FDR:0.51718)'
'm1_HMR_4095'	'm1_acetyl-CoA[m1_m] + m1_H2O[m1_m] => m1_acetate[m1_m] + m1_CoA[m1_m]'	0	0	0	NaN	NaN	'm1_Pyruvate metabolism'	'm1_Acot12(lgFC:0.37815FDR:0.51718)'
'm1_HMR_4143'	'm1_ATP[m1_m] + m1_H+[m1_m] + m1_HCO3-[m1_m] + m1_pyruvate[m1_m] => m1_ADP[m1_m] + m1_OAA[m1_m] + m1_Pi[m1_m]'	0	0	0	NaN	NaN	'm1_Pyruvate metabolism'	'm1_Pcx(lgFC:0.16175FDR:0.98086)'
'm1_HMR_8497'	'm1_H+[m1_c] + m1_methylglyoxal[m1_c] + m1_NADPH[m1_c] => m1_hydroxyacetone[m1_c] + m1_NADP+[m1_c]'	0	0	0	NaN	NaN	'm1_Pyruvate metabolism'	'm1_Akr1a1(lgFC:-0.09256FDR:0.95799) or m1_Akr1b3(lgFC:-0.17747FDR:0.81499) or m1_Akr7a5(lgFC:-0.12134FDR:0.99186)'
'm1_HMR_8498'	'm1_acetone[m1_c] + m1_H+[m1_c] + m1_NADPH[m1_c] + m1_O2[m1_c] => m1_H2O[m1_c] + m1_hydroxyacetone[m1_c] + m1_NADP+[m1_c]'	0	0	0	NaN	NaN	'm1_Pyruvate metabolism'	'm1_Cyp2e1(lgFC:0.26455FDR:0.98278)'
'm1_HMR_8499'	'm1_H+[m1_c] + m1_hydroxyacetone[m1_c] + m1_NADPH[m1_c] + m1_O2[m1_c] => 2 m1_H2O[m1_c] + m1_methylglyoxal[m1_c] + m1_NADP+[m1_c]'	0	0	0	NaN	NaN	'm1_Pyruvate metabolism'	'm1_Cyp2e1(lgFC:0.26455FDR:0.98278)'
'm1_HMR_8500'	'm1_H+[m1_c] + m1_hydroxyacetone[m1_c] + m1_NADPH[m1_c] => m1_NADP+[m1_c] + m1_propane-1,2-diol[m1_c]'	0	0	0	NaN	NaN	'm1_Pyruvate metabolism'	'm1_Akr1a1(lgFC:-0.09256FDR:0.95799) or m1_Akr1b3(lgFC:-0.17747FDR:0.81499) or m1_Akr7a5(lgFC:-0.12134FDR:0.99186)'
'm1_HMR_8501'	'm1_H+[m1_c] + m1_methylglyoxal[m1_c] + m1_NADPH[m1_c] => m1_D-lactaldehyde[m1_c] + m1_NADP+[m1_c]'	0	0	0	NaN	NaN	'm1_Pyruvate metabolism'	'm1_Grhpr(lgFC:0.020029FDR:1)'
'm1_HMR_8502'	'm1_D-lactaldehyde[m1_c] + m1_GSH[m1_c] + m1_NAD+[m1_c] => m1_(R)-S-lactoylglutathione[m1_c] + m1_H+[m1_c] + m1_NADH[m1_c]'	0	0	0	NaN	NaN	'm1_Pyruvate metabolism'	'm1_Adh1(lgFC:-0.71411FDR:0.44374) or m1_Adh4(lgFC:-0.57187FDR:0.3751) or m1_Adh5(lgFC:-0.021378FDR:1) or m1_Adh7(lgFC:0.0061505FDR:1) or m1_Adhfe1(lgFC:0.17131FDR:0.97231)'
'm1_HMR_8503'	'm1_H2O[m1_c] + m1_lactaldehyde[m1_c] + m1_NAD+[m1_c] => m1_H+[m1_c] + m1_L-lactate[m1_c] + m1_NADH[m1_c]'	0	0	0	NaN	NaN	'm1_Pyruvate metabolism'	'm1_Aldh1a3(lgFC:1.087FDR:0.44812) or m1_Aldh3a2(lgFC:-0.10108FDR:1) or m1_Aldh3b1(lgFC:-0.15805FDR:0.99096) or m1_Aldh7a1(lgFC:-0.19043FDR:0.71271) or m1_Aldh9a1(lgFC:0.08386FDR:0.98923)'
'm1_HMR_8504'	'm1_D-lactaldehyde[m1_c] + m1_H2O[m1_c] + m1_NAD+[m1_c] => m1_D-lactate[m1_c] + m1_H+[m1_c] + m1_NADH[m1_c]'	0	0	0	NaN	NaN	'm1_Pyruvate metabolism'	'm1_Aldh1b1(lgFC:-0.28921FDR:0.73037) or m1_Aldh2(lgFC:-0.029657FDR:1) or m1_Aldh3a2(lgFC:-0.10108FDR:1) or m1_Aldh7a1(lgFC:-0.19043FDR:0.71271) or m1_Aldh9a1(lgFC:0.08386FDR:0.98923)'
'm1_HMR_8506'	'm1_H2O[m1_m] + m1_lactaldehyde[m1_m] + m1_NAD+[m1_m] => m1_H+[m1_m] + m1_L-lactate[m1_m] + m1_NADH[m1_m]'	0	0	0	NaN	NaN	'm1_Pyruvate metabolism'	'm1_Aldh1b1(lgFC:-0.28921FDR:0.73037) or m1_Aldh2(lgFC:-0.029657FDR:1) or m1_Aldh3a2(lgFC:-0.10108FDR:1) or m1_Aldh7a1(lgFC:-0.19043FDR:0.71271) or m1_Aldh9a1(lgFC:0.08386FDR:0.98923)'
'm1_HMR_8507'	'm1_NAD+[m1_c] + m1_propane-1,2-diol[m1_c] => m1_D-lactaldehyde[m1_c] + m1_H+[m1_c] + m1_NADH[m1_c]'	0	0	0	NaN	NaN	'm1_Pyruvate metabolism'	'm1_Adh1(lgFC:-0.71411FDR:0.44374) or m1_Adh4(lgFC:-0.57187FDR:0.3751) or m1_Adh5(lgFC:-0.021378FDR:1) or m1_Adh7(lgFC:0.0061505FDR:1) or m1_Adhfe1(lgFC:0.17131FDR:0.97231) or m1_Zadh2(lgFC:0.061001FDR:0.9879)'
'm1_HMR_8508'	'm1_NAD+[m1_c] + m1_propane-1,2-diol[m1_c] => m1_H+[m1_c] + m1_lactaldehyde[m1_c] + m1_NADH[m1_c]'	0	0	0	NaN	NaN	'm1_Pyruvate metabolism'	'm1_Adh1(lgFC:-0.71411FDR:0.44374) or m1_Adh4(lgFC:-0.57187FDR:0.3751) or m1_Adh5(lgFC:-0.021378FDR:1) or m1_Adh7(lgFC:0.0061505FDR:1) or m1_Adhfe1(lgFC:0.17131FDR:0.97231) or m1_Zadh2(lgFC:0.061001FDR:0.9879)'
'm1_HMR_8509'	'm1_D-lactaldehyde[m1_c] + m1_H+[m1_c] + m1_NADPH[m1_c] => m1_NADP+[m1_c] + m1_propane-1,2-diol[m1_c]'	0	0	0	NaN	NaN	'm1_Pyruvate metabolism'	'm1_Akr1a1(lgFC:-0.09256FDR:0.95799) or m1_Akr1b3(lgFC:-0.17747FDR:0.81499) or m1_Akr7a5(lgFC:-0.12134FDR:0.99186)'
'm1_HMR_8512'	'm1_D-lactate[m1_c] + m1_NAD+[m1_c] => m1_H+[m1_c] + m1_NADH[m1_c] + m1_pyruvate[m1_c]'	0	0	0	NaN	NaN	'm1_Pyruvate metabolism'	'm1_Ldhd(lgFC:0.080092FDR:1)'
'm1_HMR_8516'	'm1_DHAP[m1_c] => m1_methylglyoxal[m1_c] + m1_Pi[m1_c]'	0	0	0	NaN	NaN	'm1_Pyruvate metabolism'	'm1_Auh(lgFC:-0.015321FDR:1)'
'm1_HMR_8517'	'm1_GAP[m1_c] => m1_methylglyoxal[m1_c] + m1_Pi[m1_c]'	0	0	0	NaN	NaN	'm1_Pyruvate metabolism'	''
'm1_HMR_0153'	'm1_AMP[m1_c] + m1_PPi[m1_c] + m1_propanoyl-CoA[m1_c] <=> m1_ATP[m1_c] + m1_CoA[m1_c] + m1_propanoate[m1_c]'	1	1.20039	2.20039	NaN	1.20039	'm1_Propanoate metabolism'	'm1_Acss1(lgFC:-0.67372FDR:0.86693) or m1_Acss2(lgFC:-0.87472FDR:0.16284) or m1_Acss3(lgFC:1.103FDR:0.10155)'
'm1_HMR_3797'	'm1_AMP[m1_m] + m1_PPi[m1_m] + m1_propanoyl-CoA[m1_m] <=> m1_ATP[m1_m] + m1_CoA[m1_m] + m1_propanoate[m1_m]'	1	1.20039	2.20039	NaN	1.20039	'm1_Propanoate metabolism'	'm1_Acss1(lgFC:-0.67372FDR:0.86693) or m1_Acss2(lgFC:-0.87472FDR:0.16284) or m1_Acss3(lgFC:1.103FDR:0.10155)'
'm1_HMR_3212'	'm1_FAD[m1_m] + m1_propanoyl-CoA[m1_m] <=> m1_acrylyl-CoA[m1_m] + m1_FADH2[m1_m]'	0	-0.124931	0.124931	NaN	NaN	'm1_Propanoate metabolism'	'm1_Acad10(lgFC:-0.067452FDR:1) or m1_Acad11(lgFC:0.26159FDR:0.76893) or m1_Acad8(lgFC:0.098579FDR:0.92085) or m1_Acad9(lgFC:0.0092517FDR:1) or m1_Acadm(lgFC:0.62614FDR:0.22355) or m1_Acads(lgFC:0.09156FDR:0.98922) or m1_Acadsb(lgFC:-0.24846FDR:0.81679)'
'm1_HMR_3800'	'm1_2-oxobutyrate[m1_m] + m1_CoA[m1_m] + m1_NAD+[m1_m] => m1_CO2[m1_m] + m1_H+[m1_m] + m1_NADH[m1_m] + m1_propanoyl-CoA[m1_m]'	0.294715	0.296083	0.590798	NaN	NaN	'm1_Propanoate metabolism'	''
'm1_HMR_4105'	'm1_malonyl-CoA[m1_c] => m1_acetyl-CoA[m1_c] + m1_CO2[m1_c]'	0	0	0	NaN	NaN	'm1_Propanoate metabolism'	'm1_Mlycd(lgFC:0.13029FDR:0.92592)'
'm1_HMR_4106'	'm1_malonyl-CoA[m1_m] => m1_acetyl-CoA[m1_m] + m1_CO2[m1_m]'	0	0	0	NaN	NaN	'm1_Propanoate metabolism'	'm1_Mlycd(lgFC:0.13029FDR:0.92592)'
'm1_HMR_4107'	'm1_malonyl-CoA[m1_p] => m1_acetyl-CoA[m1_p] + m1_CO2[m1_p]'	0	0	0	NaN	NaN	'm1_Propanoate metabolism'	'm1_Mlycd(lgFC:0.13029FDR:0.92592)'
'm1_HMR_4282'	'm1_3-oxopropanoate[m1_m] + m1_CoA[m1_m] + m1_NAD+[m1_m] => m1_acetyl-CoA[m1_m] + m1_CO2[m1_m] + m1_H+[m1_m] + m1_NADH[m1_m]'	0.626914	0.627055	1.25397	NaN	0.627055	'm1_Propanoate metabolism'	'm1_Aldh6a1(lgFC:0.07587FDR:0.99582)'
'm1_HMR_4331'	'm1_AMP[m1_c] + m1_propanoyl-CoA[m1_c] <=> m1_CoA[m1_c] + m1_propinol adenylate[m1_c]'	1	-1.20039	2.20039	NaN	1.20039	'm1_Propanoate metabolism'	'm1_Acss1(lgFC:-0.67372FDR:0.86693) or m1_Acss2(lgFC:-0.87472FDR:0.16284) or m1_Acss3(lgFC:1.103FDR:0.10155)'
'm1_HMR_3796'	'm1_AMP[m1_m] + m1_propanoyl-CoA[m1_m] <=> m1_CoA[m1_m] + m1_propinol adenylate[m1_m]'	1	-1.20039	2.20039	NaN	1.20039	'm1_Valine, leucine, and isoleucine metabolism'	'm1_Acss1(lgFC:-0.67372FDR:0.86693) or m1_Acss2(lgFC:-0.87472FDR:0.16284) or m1_Acss3(lgFC:1.103FDR:0.10155)'
'm1_HMR_4459'	'm1_ATP[m1_c] + m1_propanoate[m1_c] <=> m1_PPi[m1_c] + m1_propinol adenylate[m1_c]'	1	1.20039	2.20039	NaN	1.20039	'm1_Propanoate metabolism'	'm1_Acss1(lgFC:-0.67372FDR:0.86693) or m1_Acss2(lgFC:-0.87472FDR:0.16284) or m1_Acss3(lgFC:1.103FDR:0.10155)'
'm1_HMR_4460'	'm1_ATP[m1_m] + m1_propanoate[m1_m] <=> m1_PPi[m1_m] + m1_propinol adenylate[m1_m]'	1	1.20039	2.20039	NaN	1.20039	'm1_Propanoate metabolism'	'm1_Acss1(lgFC:-0.67372FDR:0.86693) or m1_Acss2(lgFC:-0.87472FDR:0.16284) or m1_Acss3(lgFC:1.103FDR:0.10155)'
'm1_HMR_4464'	'm1_acetoacetate[m1_m] => m1_acetone[m1_m] + m1_CO2[m1_m]'	0	0	0	NaN	NaN	'm1_Propanoate metabolism'	''
'm1_HMR_8078'	'm1_H2O[m1_c] + m1_OAA[m1_c] + m1_propanoyl-CoA[m1_c] => m1_2-methylcitrate[m1_c] + m1_CoA[m1_c]'	0	0	0	NaN	NaN	'm1_Propanoate metabolism'	''
'm1_HMR_9803'	'm1_H+[m1_m] + m1_malonyl-CoA[m1_m] + m1_NADPH[m1_m] => m1_H2O[m1_m] + m1_NADP+[m1_m] + m1_3-oxopropionyl-CoA[m1_m]'	0	0	0	NaN	NaN	'm1_Propanoate metabolism'	''
'm1_HMR_9804'	'm1_H+[m1_m] + m1_NADPH[m1_m] + m1_3-oxopropionyl-CoA[m1_m] => m1_3-hydroxypropionyl-CoA[m1_m] + m1_NADP+[m1_m]'	0	0	0	NaN	NaN	'm1_Propanoate metabolism'	'm1_Adh5(lgFC:-0.021378FDR:1) or m1_Akr1b8(lgFC:-0.41868FDR:0.81814) or m1_Akr1c6(lgFC:-0.47079FDR:0.98475) or m1_Bdh2(lgFC:-0.87355FDR:0.6101) or m1_Cbr4(lgFC:0.13947FDR:0.88385) or m1_Ctbp1(lgFC:-0.084127FDR:0.89809) or m1_H2-Ke6(lgFC:-0.22721FDR:0.80509) or m1_Hsd17b11(lgFC:0.13077FDR:0.92394) or m1_Hsd3b7(lgFC:-0.27162FDR:0.77118) or m1_Htatip2(lgFC:-0.0002324FDR:1) or m1_Rdh10(lgFC:-0.28298F…
'm1_HMR_4741'	'm1_3-hydroxypropionyl-CoA[m1_m] + m1_H2O[m1_m] => m1_CoA[m1_m] + m1_hydracrylate[m1_m]'	0.296083	0.296083	0.592166	NaN	0.296083	'm1_Propanoate metabolism'	'm1_Hibch(lgFC:0.047432FDR:1)'
'm1_HMR_4497'	'm1_hydracrylate[m1_m] + m1_NAD+[m1_m] => m1_3-oxopropanoate[m1_m] + m1_H+[m1_m] + m1_NADH[m1_m]'	0.296083	0.296083	0.592166	NaN	0.299266	'm1_Propanoate metabolism'	'm1_Dhcr24(lgFC:0.19463FDR:0.92557)'
'm1_HMR_0718'	'm1_AKG[m1_c] + m1_FADH2[m1_c] => m1_2-hydroxyglutarate[m1_c] + m1_FAD[m1_c]'	0	0	0	NaN	NaN	'm1_Butanoate metabolism'	'm1_L2hgdh(lgFC:-0.1289FDR:0.90712)'
'm1_HMR_0719'	'm1_AKG[m1_c] + m1_H+[m1_c] + m1_NADH[m1_c] => m1_2-hydroxyglutarate[m1_c] + m1_NAD+[m1_c]'	0	0	0	NaN	NaN	'm1_Butanoate metabolism'	'm1_Phgdh(lgFC:-0.73187FDR:0.9391)'
'm1_HMR_1434'	'm1_acetoacetyl-CoA[m1_c] + m1_CoA[m1_c] <=> 2 m1_acetyl-CoA[m1_c]'	0.00956057	2.38702e-09	0.00956057	NaN	0.00861395	'm1_Butanoate metabolism'	'm1_Acat2(lgFC:-0.38538FDR:0.57763)'
'm1_HMR_1436'	'm1_acetoacetate[m1_c] + m1_ATP[m1_c] + m1_CoA[m1_c] => m1_acetoacetyl-CoA[m1_c] + m1_AMP[m1_c] + m1_PPi[m1_c]'	0.00956057	2.38702e-09	0.00956057	NaN	0.00935738	'm1_Butanoate metabolism'	'm1_Aacs(lgFC:-0.29315FDR:0.88442)'
'm1_HMR_3163'	'm1_butyryl-CoA[m1_m] + m1_FAD[m1_m] => m1_crotonyl-CoA[m1_m] + m1_FADH2[m1_m]'	0.00782443	0.00934848	0.0171729	1.0636	0.00832207	'm1_Butanoate metabolism'	'm1_Acad10(lgFC:-0.067452FDR:1) or m1_Acad11(lgFC:0.26159FDR:0.76893) or m1_Acad8(lgFC:0.098579FDR:0.92085) or m1_Acad9(lgFC:0.0092517FDR:1) or m1_Acadm(lgFC:0.62614FDR:0.22355) or m1_Acads(lgFC:0.09156FDR:0.98922) or m1_Acadsb(lgFC:-0.24846FDR:0.81679)'
'm1_HMR_4461'	'm1_(R)-3-hydroxybutanoate[m1_m] + m1_NAD+[m1_m] <=> m1_acetoacetate[m1_m] + m1_H+[m1_m] + m1_NADH[m1_m]'	2.15411	1.83711	3.99122	0.893564	1.92484	'm1_Butanoate metabolism'	'm1_Bdh1(lgFC:-0.41771FDR:0.85767) or m1_Bdh2(lgFC:-0.87355FDR:0.6101)'
'm1_HMR_4604'	'm1_acetoacetyl-CoA[m1_p] + m1_acetyl-CoA[m1_p] + m1_H2O[m1_p] => m1_CoA[m1_p] + m1_HMG-CoA[m1_p]'	1	0	1	NaN	1.35892	'm1_Butanoate metabolism'	'm1_Hmgcs1(lgFC:0.37722FDR:0.70973) or m1_Hmgcs2(lgFC:0.91084FDR:0.28296)'
'm1_HMR_5351'	'm1_2-hydroxybutyrate[m1_c] + m1_NAD+[m1_c] <=> m1_2-oxobutyrate[m1_c] + m1_H+[m1_c] + m1_NADH[m1_c]'	0.291164	0.296083	0.587246	0.99902	0.290879	'm1_Butanoate metabolism'	'm1_Htt(lgFC:-0.085968FDR:0.96613) or m1_Ldhb(lgFC:0.00079359FDR:1)'
'm1_HMR_4052'	'm1_ATP[m1_c] + m1_ribose-5-phosphate[m1_c] => m1_AMP[m1_c] + m1_PRPP[m1_c]'	0	0	0	NaN	NaN	'm1_Pentose phosphate pathway'	'm1_Prps1(lgFC:0.0051878FDR:1) or m1_Prps2(lgFC:-0.49138FDR:0.51334)'
'm1_HMR_4304'	'm1_glucose-6-phosphate[m1_r] + m1_NADP+[m1_r] => m1_glucono-1,5-lactone-6-phosphate[m1_r] + m1_H+[m1_r] + m1_NADPH[m1_r]'	0	0	0	NaN	NaN	'm1_Pentose phosphate pathway'	'm1_G6pdx(lgFC:-0.41733FDR:0.69923)'
'm1_HMR_4306'	'm1_glucose-6-phosphate[m1_c] + m1_NADP+[m1_c] => m1_glucono-1,5-lactone-6-phosphate[m1_c] + m1_H+[m1_c] + m1_NADPH[m1_c]'	0	0.12685	0.12685	NaN	NaN	'm1_Pentose phosphate pathway'	'm1_G6pdx(lgFC:-0.41733FDR:0.69923)'
'm1_HMR_4623'	'm1_glucono-1,5-lactone-6-phosphate[m1_r] + m1_H2O[m1_r] => m1_6-phospho-D-gluconate[m1_r]'	0	0	0	NaN	NaN	'm1_Pentose phosphate pathway'	'm1_H6pd(lgFC:-0.28563FDR:0.73964) or m1_Pgls(lgFC:0.061281FDR:1)'
'm1_HMR_4625'	'm1_glucono-1,5-lactone-6-phosphate[m1_c] + m1_H2O[m1_c] => m1_6-phospho-D-gluconate[m1_c]'	0	0.12685	0.12685	NaN	NaN	'm1_Pentose phosphate pathway'	'm1_H6pd(lgFC:-0.28563FDR:0.73964) or m1_Pgls(lgFC:0.061281FDR:1)'
'm1_HMR_4473'	'm1_6-phospho-D-gluconate[m1_r] + m1_NADP+[m1_r] => m1_CO2[m1_r] + m1_H+[m1_r] + m1_NADPH[m1_r] + m1_ribulose-5-phosphate[m1_r]'	0	0	0	NaN	NaN	'm1_Pentose phosphate pathway'	'm1_Pgd(lgFC:-0.24524FDR:0.78747)'
'm1_HMR_4474'	'm1_6-phospho-D-gluconate[m1_c] + m1_NADP+[m1_c] => m1_CO2[m1_c] + m1_H+[m1_c] + m1_NADPH[m1_c] + m1_ribulose-5-phosphate[m1_c]'	0	0.12685	0.12685	NaN	NaN	'm1_Pentose phosphate pathway'	'm1_Pgd(lgFC:-0.24524FDR:0.78747)'
'm1_HMR_4350'	'm1_ADP[m1_c] + m1_ribose-5-phosphate[m1_c] <=> m1_ATP[m1_c] + m1_ribose[m1_c]'	0	0	0	NaN	NaN	'm1_Pentose phosphate pathway'	'm1_Rbks(lgFC:0.014762FDR:1)'
'm1_HMR_4351'	'm1_ribose-5-phosphate[m1_r] <=> m1_ribulose-5-phosphate[m1_r]'	0	0	0	NaN	-2.60296e-13	'm1_Pentose phosphate pathway'	'm1_Rpia(lgFC:0.054926FDR:1)'
'm1_HMR_4352'	'm1_ribose-5-phosphate[m1_c] <=> m1_ribulose-5-phosphate[m1_c]'	0	0.672553	0.672553	1	NaN	'm1_Pentose phosphate pathway'	'm1_Rpia(lgFC:0.054926FDR:1)'
'm1_HMR_4354'	'm1_ribose-1-phosphate[m1_c] <=> m1_ribose-5-phosphate[m1_c]'	0	1.07225	1.07225	1.00598	-3.92779e-13	'm1_Pentose phosphate pathway'	'm1_Pgm1(lgFC:0.015044FDR:1) or m1_Pgm2(lgFC:0.18973FDR:0.91489)'
'm1_HMR_4398'	'm1_2-deoxy-D-ribose-5-phosphate[m1_c] <=> m1_acetaldehyde[m1_c] + m1_GAP[m1_c]'	0	0	0	0.965246	NaN	'm1_Pentose phosphate pathway'	'm1_Dera(lgFC:-0.19908FDR:0.73037)'
'm1_HMR_4404'	'm1_D-xylulose-5-phosphate[m1_c] + m1_erythrose-4-phosphate[m1_c] <=> m1_fructose-6-phosphate[m1_c] + m1_GAP[m1_c]'	0	0.399702	0.399702	0.755974	-9.83884e-14	'm1_Pentose phosphate pathway'	'm1_Tkt(lgFC:-0.80649FDR:0.43015)'
'm1_HMR_4477'	'm1_D-xylulose-5-phosphate[m1_c] <=> m1_ribulose-5-phosphate[m1_c]'	0	-0.799403	0.799403	1	2.60296e-13	'm1_Pentose phosphate pathway'	'm1_Rpe(lgFC:-0.0044135FDR:1)'
'm1_HMR_4501'	'm1_D-xylulose-5-phosphate[m1_c] + m1_ribose-5-phosphate[m1_c] <=> m1_GAP[m1_c] + m1_sedoheptulose-7-phosphate[m1_c]'	0	0.399702	0.399702	0.755974	-9.83884e-14	'm1_Pentose phosphate pathway'	'm1_Tkt(lgFC:-0.80649FDR:0.43015)'
'm1_HMR_4565'	'm1_GAP[m1_c] + m1_sedoheptulose-7-phosphate[m1_c] <=> m1_erythrose-4-phosphate[m1_c] + m1_fructose-6-phosphate[m1_c]'	0	0.399702	0.399702	0.957087	-1.24563e-13	'm1_Pentose phosphate pathway'	'm1_Taldo1(lgFC:-0.22645FDR:0.70459)'
'm1_HMR_4710'	'm1_2-deoxy-D-ribose-1-phosphate[m1_c] <=> m1_2-deoxy-D-ribose-5-phosphate[m1_c]'	0	0	0	1	NaN	'm1_Pentose phosphate pathway'	'm1_Pgm1(lgFC:0.015044FDR:1)'
'm1_HMR_4841'	'm1_NAD+[m1_c] + m1_ribitol[m1_c] => m1_H+[m1_c] + m1_NADH[m1_c] + m1_ribose[m1_c]'	1	0	1	NaN	1.20652	'm1_Pentose phosphate pathway'	'm1_Aldh1a3(lgFC:1.087FDR:0.44812) or m1_Aldh3b1(lgFC:-0.15805FDR:0.99096)'
'm1_HMR_8074'	'm1_ATP[m1_c] + m1_deoxyribose[m1_c] => m1_2-deoxy-D-ribose-5-phosphate[m1_c] + m1_ADP[m1_c]'	0	0	0	NaN	NaN	'm1_Pentose phosphate pathway'	'm1_Rbks(lgFC:0.014762FDR:1)'
'm1_HMR_3998'	'm1_ADP[m1_c] + m1_H2O[m1_c] => m1_AMP[m1_c] + m1_Pi[m1_c]'	0	0	0	NaN	NaN	'm1_Purine metabolism'	'm1_Cant1(lgFC:0.00054726FDR:1) or m1_Entpd1(lgFC:-0.65711FDR:0.33817) or m1_Entpd2(lgFC:-0.53541FDR:0.56275) or m1_Entpd4(lgFC:-0.065582FDR:1) or m1_Entpd5(lgFC:0.037161FDR:1) or m1_Entpd6(lgFC:-0.091637FDR:0.9879) or m1_Entpd8(lgFC:-0.18924FDR:1)'
'm1_HMR_4000'	'm1_ATP[m1_c] => m1_cAMP[m1_c] + m1_PPi[m1_c]'	0	0	0	NaN	NaN	'm1_Purine metabolism'	'm1_Adcy1(lgFC:0.085777FDR:1) or m1_Adcy2(lgFC:-1.9792FDR:0.42377) or m1_Adcy3(lgFC:-0.92227FDR:0.59457) or m1_Adcy4(lgFC:-0.28899FDR:0.94209) or m1_Adcy6(lgFC:-0.13158FDR:0.96912) or m1_Adcy7(lgFC:-0.0073523FDR:1) or m1_Adcy8(lgFC:1.643FDR:0.85087) or m1_Adcy9(lgFC:-0.29409FDR:0.78747) or m1_Gucy2c(lgFC:-0.79672FDR:0.79935) or m1_Npr1(lgFC:-0.32176FDR:0.78588) or m1_Npr2(lgFC:-0.25431FDR:0.80657…
'm1_HMR_4002'	'2 m1_ADP[m1_c] <=> m1_AMP[m1_c] + m1_ATP[m1_c]'	0	-0.00624324	0.00624324	0.972854	-0.177964	'm1_Purine metabolism'	'm1_Ak1(lgFC:0.14462FDR:1) or m1_Ak2(lgFC:-0.27901FDR:0.77344) or m1_Ak3(lgFC:0.11458FDR:0.90055) or m1_Ak4(lgFC:-0.41776FDR:0.61171) or m1_Ak7(lgFC:-0.68945FDR:0.98292)'
'm1_HMR_4004'	'2 m1_ADP[m1_m] <=> m1_AMP[m1_m] + m1_ATP[m1_m]'	-0.0366655	-0.0356702	0.0723358	NaN	-0.0356702	'm1_Purine metabolism'	'm1_Ak1(lgFC:0.14462FDR:1) or m1_Ak2(lgFC:-0.27901FDR:0.77344) or m1_Ak3(lgFC:0.11458FDR:0.90055) or m1_Ak4(lgFC:-0.41776FDR:0.61171) or m1_Ak7(lgFC:-0.68945FDR:0.98292)'
'm1_HMR_4010'	'm1_AMP[m1_c] + m1_H2O[m1_c] => m1_adenosine[m1_c] + m1_Pi[m1_c]'	0	0	0	NaN	NaN	'm1_Purine metabolism'	'm1_Acpp(lgFC:0.19062FDR:1) or m1_Nt5c(lgFC:-0.24491FDR:0.7274) or m1_Nt5c2(lgFC:-0.044429FDR:1) or m1_Nt5c3(lgFC:-0.090043FDR:0.97516) or m1_Nt5c3b(lgFC:-0.096755FDR:0.99096) or m1_Nt5e(lgFC:0.66281FDR:0.38059) or m1_Nt5m(lgFC:-0.059078FDR:1)'
'm1_HMR_4081'	'm1_AMP[m1_s] + m1_H2O[m1_s] => m1_adenosine[m1_s] + m1_Pi[m1_s]'	0	0	0	NaN	NaN	'm1_Purine metabolism'	'm1_Acpp(lgFC:0.19062FDR:1) or m1_Nt5c(lgFC:-0.24491FDR:0.7274) or m1_Nt5c2(lgFC:-0.044429FDR:1) or m1_Nt5c3(lgFC:-0.090043FDR:0.97516) or m1_Nt5c3b(lgFC:-0.096755FDR:0.99096) or m1_Nt5e(lgFC:0.66281FDR:0.38059) or m1_Nt5m(lgFC:-0.059078FDR:1)'
'm1_HMR_4082'	'm1_AMP[m1_m] + m1_H2O[m1_m] => m1_adenosine[m1_m] + m1_Pi[m1_m]'	0	0	0	NaN	NaN	'm1_Purine metabolism'	'm1_Acpp(lgFC:0.19062FDR:1) or m1_Nt5c(lgFC:-0.24491FDR:0.7274) or m1_Nt5c2(lgFC:-0.044429FDR:1) or m1_Nt5c3(lgFC:-0.090043FDR:0.97516) or m1_Nt5c3b(lgFC:-0.096755FDR:0.99096) or m1_Nt5e(lgFC:0.66281FDR:0.38059) or m1_Nt5m(lgFC:-0.059078FDR:1)'
'm1_HMR_4012'	'm1_adenosine[m1_c] + m1_ATP[m1_c] => m1_ADP[m1_c] + m1_AMP[m1_c]'	0.00088172	0	0.00088172	1.03578	0.000913271	'm1_Purine metabolism'	'm1_Adk(lgFC:0.28296FDR:0.54224) or m1_Dck(lgFC:-0.29032FDR:0.84845)'
'm1_HMR_4014'	'm1_cAMP[m1_c] + m1_H2O[m1_c] => m1_AMP[m1_c]'	0	0	0	NaN	NaN	'm1_Purine metabolism'	'm1_Il18bp(lgFC:-0.18634FDR:0.80433) or m1_Pde10a(lgFC:0.78062FDR:0.99256) or m1_Pde11a(lgFC:0.56874FDR:0.99146) or m1_Pde1a(lgFC:0.11798FDR:1) or m1_Pde1b(lgFC:0.058016FDR:1) or m1_Pde1c(lgFC:-0.70656FDR:0.86538) or m1_Pde2a(lgFC:-0.28354FDR:1) or m1_Pde3a(lgFC:0.22374FDR:0.93252) or m1_Pde3b(lgFC:0.19386FDR:0.93546) or m1_Pde4a(lgFC:-0.61109FDR:0.64269) or m1_Pde4b(lgFC:-0.4381FDR:0.82017) or m…
'm1_HMR_4020'	'm1_ADP[m1_c] + m1_GDP[m1_c] <=> m1_ATP[m1_c] + m1_GMP[m1_c]'	0	0	0	NaN	NaN	'm1_Purine metabolism'	'm1_Guk1(lgFC:0.30215FDR:0.55721)'
'm1_HMR_4022'	'm1_GTP[m1_c] => m1_cGMP[m1_c] + m1_PPi[m1_c]'	0	0	0	NaN	NaN	'm1_Purine metabolism'	'm1_Adcy1(lgFC:0.085777FDR:1) or m1_Adcy2(lgFC:-1.9792FDR:0.42377) or m1_Adcy3(lgFC:-0.92227FDR:0.59457) or m1_Adcy4(lgFC:-0.28899FDR:0.94209) or m1_Adcy6(lgFC:-0.13158FDR:0.96912) or m1_Adcy7(lgFC:-0.0073523FDR:1) or m1_Adcy8(lgFC:1.643FDR:0.85087) or m1_Adcy9(lgFC:-0.29409FDR:0.78747) or m1_Gucy2c(lgFC:-0.79672FDR:0.79935) or m1_Npr1(lgFC:-0.32176FDR:0.78588) or m1_Npr2(lgFC:-0.25431FDR:0.80657…
'm1_HMR_4038'	'm1_FAICAR[m1_c] <=> m1_H2O[m1_c] + m1_IMP[m1_c]'	0	0	0	NaN	NaN	'm1_Purine metabolism'	'm1_Atic(lgFC:-0.13021FDR:0.76764)'
'm1_HMR_4040'	'm1_H2O[m1_c] + m1_IMP[m1_c] + m1_NAD+[m1_c] => m1_H+[m1_c] + m1_NADH[m1_c] + m1_xanthosine-5-phosphate[m1_c]'	0	0	0	0.975936	NaN	'm1_Purine metabolism'	'm1_Impdh1(lgFC:-0.03584FDR:1) or m1_Impdh2(lgFC:-0.17688FDR:0.5829)'
'm1_HMR_4042'	'm1_aspartate[m1_c] + m1_GTP[m1_c] + m1_IMP[m1_c] => m1_adenylosuccinate[m1_c] + m1_GDP[m1_c] + m1_Pi[m1_c]'	0	0	0	NaN	NaN	'm1_Purine metabolism'	'm1_Adss(lgFC:0.074512FDR:0.96138) or m1_Adssl1(lgFC:-0.22326FDR:0.56519)'
'm1_HMR_4046'	'm1_ATP[m1_c] + m1_glutamine[m1_c] + m1_H2O[m1_c] + m1_xanthosine-5-phosphate[m1_c] => m1_AMP[m1_c] + m1_glutamate[m1_c] + m1_GMP[m1_c] + m1_PPi[m1_c]'	1	0	1	NaN	1.21746	'm1_Purine metabolism'	'm1_Gmps(lgFC:0.31771FDR:0.11729)'
'm1_HMR_4048'	'm1_cGMP[m1_c] + m1_H2O[m1_c] => m1_GMP[m1_c]'	0	0	0	NaN	NaN	'm1_Purine metabolism'	'm1_Il18bp(lgFC:-0.18634FDR:0.80433) or m1_Pde10a(lgFC:0.78062FDR:0.99256) or m1_Pde11a(lgFC:0.56874FDR:0.99146) or m1_Pde1a(lgFC:0.11798FDR:1) or m1_Pde1b(lgFC:0.058016FDR:1) or m1_Pde1c(lgFC:-0.70656FDR:0.86538) or m1_Pde2a(lgFC:-0.28354FDR:1) or m1_Pde3a(lgFC:0.22374FDR:0.93252) or m1_Pde3b(lgFC:0.19386FDR:0.93546) or m1_Pde4a(lgFC:-0.61109FDR:0.64269) or m1_Pde4b(lgFC:-0.4381FDR:0.82017) or m…
'm1_HMR_4080'	'm1_AMP[m1_c] + m1_H2O[m1_c] => m1_IMP[m1_c] + m1_NH3[m1_c]'	0	0	0	NaN	NaN	'm1_Purine metabolism'	'm1_Ampd2(lgFC:-0.17437FDR:0.95235) or m1_Ampd3(lgFC:0.60452FDR:0.76956)'
'm1_HMR_4085'	'm1_AMP[m1_c] + m1_PPi[m1_c] <=> m1_adenine[m1_c] + m1_PRPP[m1_c]'	0	0.00311121	0.00311121	NaN	NaN	'm1_Purine metabolism'	'm1_Aprt(lgFC:0.26645FDR:0.76893)'
'm1_HMR_4134'	'm1_GDP[m1_s] + m1_H2O[m1_s] => m1_GMP[m1_s] + m1_Pi[m1_s]'	0	0	0	NaN	NaN	'm1_Purine metabolism'	'm1_Cant1(lgFC:0.00054726FDR:1) or m1_Entpd1(lgFC:-0.65711FDR:0.33817) or m1_Entpd2(lgFC:-0.53541FDR:0.56275) or m1_Entpd4(lgFC:-0.065582FDR:1) or m1_Entpd5(lgFC:0.037161FDR:1) or m1_Entpd6(lgFC:-0.091637FDR:0.9879) or m1_Entpd8(lgFC:-0.18924FDR:1)'
'm1_HMR_4168'	'm1_GTP[m1_c] + m1_H2O[m1_c] => m1_GMP[m1_c] + m1_PPi[m1_c]'	0	0	0	NaN	NaN	'm1_Purine metabolism'	'm1_Itpa(lgFC:0.31896FDR:0.28205)'
'm1_HMR_4290'	'm1_H2O[m1_s] + m1_ITP[m1_s] => m1_IDP[m1_s] + m1_Pi[m1_s]'	0	0	0	NaN	NaN	'm1_Purine metabolism'	'm1_Entpd1(lgFC:-0.65711FDR:0.33817) or m1_Entpd8(lgFC:-0.18924FDR:1)'
'm1_HMR_4406'	'm1_glutamine[m1_c] + m1_H2O[m1_c] + m1_PRPP[m1_c] => m1_5-phosphoribosylamine[m1_c] + m1_glutamate[m1_c] + m1_PPi[m1_c]'	0	0	0	NaN	NaN	'm1_Purine metabolism'	'm1_Ppat(lgFC:-0.31635FDR:0.78995)'
'm1_HMR_4412'	'm1_AMP[m1_c] + m1_fumarate[m1_c] <=> m1_adenylosuccinate[m1_c]'	0	0	0	NaN	NaN	'm1_Purine metabolism'	'm1_Adsl(lgFC:-0.22896FDR:0.84671) or m1_Tnrc6b(lgFC:0.10411FDR:0.90774)'
'm1_HMR_4417'	'm1_H2O[m1_c] + m1_IMP[m1_c] => m1_inosine[m1_c] + m1_Pi[m1_c]'	0	0	0	NaN	NaN	'm1_Purine metabolism'	'm1_Acpp(lgFC:0.19062FDR:1) or m1_Nt5c(lgFC:-0.24491FDR:0.7274) or m1_Nt5c2(lgFC:-0.044429FDR:1) or m1_Nt5c3(lgFC:-0.090043FDR:0.97516) or m1_Nt5c3b(lgFC:-0.096755FDR:0.99096) or m1_Nt5e(lgFC:0.66281FDR:0.38059) or m1_Nt5m(lgFC:-0.059078FDR:1)'
'm1_HMR_4418'	'm1_IMP[m1_c] + m1_PPi[m1_c] <=> m1_hypoxanthine[m1_c] + m1_PRPP[m1_c]'	1	0	1	1.42157	1.42157	'm1_Purine metabolism'	'm1_Hprt(lgFC:0.51625FDR:0.020125)'
'm1_HMR_4419'	'm1_GMP[m1_c] + m1_H+[m1_c] + m1_NADPH[m1_c] => m1_IMP[m1_c] + m1_NADP+[m1_c] + m1_NH3[m1_c]'	0	0	0	NaN	0	'm1_Purine metabolism'	'm1_Gmpr(lgFC:-1.5748FDR:0.12001) or m1_Gmpr2(lgFC:-0.17526FDR:0.70028)'
'm1_HMR_4449'	'm1_GMP[m1_c] + m1_H2O[m1_c] => m1_guanosine[m1_c] + m1_Pi[m1_c]'	0	0	0	NaN	NaN	'm1_Purine metabolism'	'm1_Acpp(lgFC:0.19062FDR:1) or m1_Nt5c(lgFC:-0.24491FDR:0.7274) or m1_Nt5c2(lgFC:-0.044429FDR:1) or m1_Nt5c3(lgFC:-0.090043FDR:0.97516) or m1_Nt5c3b(lgFC:-0.096755FDR:0.99096) or m1_Nt5e(lgFC:0.66281FDR:0.38059) or m1_Nt5m(lgFC:-0.059078FDR:1)'
'm1_HMR_4450'	'm1_GMP[m1_s] + m1_H2O[m1_s] => m1_guanosine[m1_s] + m1_Pi[m1_s]'	0	0	0	NaN	NaN	'm1_Purine metabolism'	'm1_Acpp(lgFC:0.19062FDR:1) or m1_Nt5c(lgFC:-0.24491FDR:0.7274) or m1_Nt5c2(lgFC:-0.044429FDR:1) or m1_Nt5c3(lgFC:-0.090043FDR:0.97516) or m1_Nt5c3b(lgFC:-0.096755FDR:0.99096) or m1_Nt5e(lgFC:0.66281FDR:0.38059) or m1_Nt5m(lgFC:-0.059078FDR:1)'
'm1_HMR_4452'	'm1_GMP[m1_c] + m1_PPi[m1_c] <=> m1_guanine[m1_c] + m1_PRPP[m1_c]'	2.74003e-13	0	2.74003e-13	NaN	1.42157	'm1_Purine metabolism'	'm1_Hprt(lgFC:0.51625FDR:0.020125)'
'm1_HMR_4453'	'm1_ATP[m1_c] + m1_NH3[m1_c] + m1_xanthosine-5-phosphate[m1_c] => m1_AMP[m1_c] + m1_GMP[m1_c] + m1_PPi[m1_c]'	2.74003e-13	0	2.74003e-13	NaN	1.21746	'm1_Purine metabolism'	'm1_Gmps(lgFC:0.31771FDR:0.11729)'
'm1_HMR_4480'	'm1_ADP[m1_c] + m1_dADP[m1_c] <=> m1_ATP[m1_c] + m1_dAMP[m1_c]'	0	0	0	NaN	NaN	'm1_Purine metabolism'	'm1_Acad8(lgFC:0.098579FDR:0.92085) or m1_Acad9(lgFC:0.0092517FDR:1) or m1_Acadm(lgFC:0.62614FDR:0.22355) or m1_Acadvl(lgFC:0.25756FDR:0.76893) or m1_Acox3(lgFC:-0.12847FDR:0.99096) or m1_Ak1(lgFC:0.14462FDR:1) or m1_Ak2(lgFC:-0.27901FDR:0.77344) or m1_Ak3(lgFC:0.11458FDR:0.90055) or m1_Ak4(lgFC:-0.41776FDR:0.61171) or m1_Ak7(lgFC:-0.68945FDR:0.98292)'
'm1_HMR_4481'	'm1_adenosine[m1_c] + m1_H2O[m1_c] => m1_inosine[m1_c] + m1_NH3[m1_c]'	0	0	0	NaN	NaN	'm1_Purine metabolism'	'm1_Ada(lgFC:-0.55239FDR:0.8001)'
'm1_HMR_4482'	'm1_adenosine[m1_s] + m1_H2O[m1_s] => m1_inosine[m1_s] + m1_NH3[m1_s]'	0	0	0	NaN	NaN	'm1_Purine metabolism'	'm1_Ada(lgFC:-0.55239FDR:0.8001)'
'm1_HMR_4486'	'm1_glucose[m1_c] + m1_ITP[m1_c] => m1_glucose-6-phosphate[m1_c] + m1_IDP[m1_c]'	0	0	0	NaN	NaN	'm1_Purine metabolism'	'm1_Hk1(lgFC:-0.13604FDR:0.99256) or m1_Hk2(lgFC:-0.74271FDR:0.48207) or m1_Hk3(lgFC:-1.4714FDR:0.61669)'
'm1_HMR_4487'	'm1_dATP[m1_c] + m1_glucose[m1_c] => m1_dADP[m1_c] + m1_glucose-6-phosphate[m1_c]'	0	0	0	NaN	NaN	'm1_Purine metabolism'	'm1_Hk1(lgFC:-0.13604FDR:0.99256) or m1_Hk2(lgFC:-0.74271FDR:0.48207) or m1_Hk3(lgFC:-1.4714FDR:0.61669)'
'm1_HMR_4488'	'm1_fructose[m1_c] + m1_ITP[m1_c] => m1_fructose-6-phosphate[m1_c] + m1_IDP[m1_c]'	0	0	0	NaN	NaN	'm1_Purine metabolism'	'm1_Hk1(lgFC:-0.13604FDR:0.99256) or m1_Hk2(lgFC:-0.74271FDR:0.48207) or m1_Hk3(lgFC:-1.4714FDR:0.61669)'
'm1_HMR_4489'	'm1_dATP[m1_c] + m1_fructose[m1_c] => m1_dADP[m1_c] + m1_fructose-6-phosphate[m1_c]'	0	0	0	NaN	NaN	'm1_Purine metabolism'	'm1_Hk1(lgFC:-0.13604FDR:0.99256) or m1_Hk2(lgFC:-0.74271FDR:0.48207) or m1_Hk3(lgFC:-1.4714FDR:0.61669)'
'm1_HMR_4492'	'm1_ITP[m1_c] + m1_mannose[m1_c] => m1_IDP[m1_c] + m1_mannose-6-phosphate[m1_c]'	0	0	0	NaN	NaN	'm1_Purine metabolism'	'm1_Hk1(lgFC:-0.13604FDR:0.99256) or m1_Hk2(lgFC:-0.74271FDR:0.48207) or m1_Hk3(lgFC:-1.4714FDR:0.61669)'
'm1_HMR_4493'	'm1_dATP[m1_c] + m1_mannose[m1_c] => m1_dADP[m1_c] + m1_mannose-6-phosphate[m1_c]'	0	0	0	NaN	NaN	'm1_Purine metabolism'	'm1_Hk1(lgFC:-0.13604FDR:0.99256) or m1_Hk2(lgFC:-0.74271FDR:0.48207) or m1_Hk3(lgFC:-1.4714FDR:0.61669)'
'm1_HMR_4495'	'm1_glucosamine[m1_c] + m1_ITP[m1_c] => m1_glucosamine-6-phosphate[m1_c] + m1_IDP[m1_c]'	0	0	0	NaN	NaN	'm1_Purine metabolism'	'm1_Hk1(lgFC:-0.13604FDR:0.99256) or m1_Hk2(lgFC:-0.74271FDR:0.48207) or m1_Hk3(lgFC:-1.4714FDR:0.61669)'
'm1_HMR_4496'	'm1_dATP[m1_c] + m1_glucosamine[m1_c] => m1_dADP[m1_c] + m1_glucosamine-6-phosphate[m1_c]'	0	0	0	NaN	NaN	'm1_Purine metabolism'	'm1_Hk1(lgFC:-0.13604FDR:0.99256) or m1_Hk2(lgFC:-0.74271FDR:0.48207) or m1_Hk3(lgFC:-1.4714FDR:0.61669)'
'm1_HMR_4518'	'm1_guanine[m1_c] + m1_H2O[m1_c] => m1_NH3[m1_c] + m1_xanthine[m1_c]'	0	0	0	NaN	NaN	'm1_Purine metabolism'	'm1_Gda(lgFC:-0.16248FDR:0.95524)'
'm1_HMR_4519'	'm1_H2O[m1_c] + m1_hypoxanthine[m1_c] + m1_NAD+[m1_c] => m1_H+[m1_c] + m1_NADH[m1_c] + m1_xanthine[m1_c]'	0	0	0	NaN	-3.90444e-13	'm1_Purine metabolism'	''
'm1_HMR_4520'	'm1_H2O[m1_c] + m1_hypoxanthine[m1_c] + m1_O2[m1_c] => m1_H2O2[m1_c] + m1_xanthine[m1_c]'	0	0	0	NaN	NaN	'm1_Purine metabolism'	''
'm1_HMR_4574'	'm1_inosine[m1_c] + m1_Pi[m1_c] <=> m1_hypoxanthine[m1_c] + m1_ribose-1-phosphate[m1_c]'	0	1.06064	1.06064	1.03371	-4.03604e-13	'm1_Purine metabolism'	'm1_Pnp(lgFC:0.21237FDR:0.78747)'
'm1_HMR_4600'	'm1_ATP[m1_c] + m1_deoxyguanosine[m1_c] => m1_ADP[m1_c] + m1_dGMP[m1_c]'	0	0	0	NaN	NaN	'm1_Purine metabolism'	'm1_Dguok(lgFC:-0.0081051FDR:1)'
'm1_HMR_4602'	'm1_dGMP[m1_c] + m1_H2O[m1_c] => m1_deoxyguanosine[m1_c] + m1_Pi[m1_c]'	0	0	0	NaN	NaN	'm1_Purine metabolism'	'm1_Acpp(lgFC:0.19062FDR:1) or m1_Nt5c(lgFC:-0.24491FDR:0.7274) or m1_Nt5c2(lgFC:-0.044429FDR:1) or m1_Nt5c3(lgFC:-0.090043FDR:0.97516) or m1_Nt5c3b(lgFC:-0.096755FDR:0.99096) or m1_Nt5e(lgFC:0.66281FDR:0.38059) or m1_Nt5m(lgFC:-0.059078FDR:1)'
'm1_HMR_4603'	'm1_2-deoxy-D-ribose-1-phosphate[m1_c] + m1_guanine[m1_c] <=> m1_deoxyguanosine[m1_c] + m1_Pi[m1_c]'	0	0	0	1.02103	NaN	'm1_Purine metabolism'	'm1_Pnp(lgFC:0.21237FDR:0.78747) or m1_Tymp(lgFC:0.24669FDR:0.95515)'
'm1_HMR_4611'	'm1_ATP[m1_c] + m1_thioredoxin[m1_c] => m1_dATP[m1_c] + m1_H2O[m1_c] + m1_oxidized thioredoxin[m1_c]'	0	0	0	NaN	NaN	'm1_Purine metabolism'	'm1_Rrm1(lgFC:-0.22412FDR:0.74699) or m1_Rrm2(lgFC:0.32191FDR:0.88747) or m1_Rrm2b(lgFC:-0.10506FDR:0.97019) or m1_Txn1(lgFC:-0.29546FDR:0.26076)'
'm1_HMR_4612'	'm1_ADP[m1_c] + m1_thioredoxin[m1_c] => m1_dADP[m1_c] + m1_H2O[m1_c] + m1_oxidized thioredoxin[m1_c]'	0	0	0	NaN	NaN	'm1_Purine metabolism'	'm1_Rrm1(lgFC:-0.22412FDR:0.74699) or m1_Rrm2(lgFC:0.32191FDR:0.88747) or m1_Rrm2b(lgFC:-0.10506FDR:0.97019) or m1_Txn1(lgFC:-0.29546FDR:0.26076)'
'm1_HMR_4614'	'm1_GTP[m1_c] + m1_thioredoxin[m1_c] => m1_dGTP[m1_c] + m1_H2O[m1_c] + m1_oxidized thioredoxin[m1_c]'	0	0	0	NaN	NaN	'm1_Purine metabolism'	'm1_Rrm1(lgFC:-0.22412FDR:0.74699) or m1_Rrm2(lgFC:0.32191FDR:0.88747) or m1_Rrm2b(lgFC:-0.10506FDR:0.97019) or m1_Txn1(lgFC:-0.29546FDR:0.26076)'
'm1_HMR_4615'	'm1_GDP[m1_c] + m1_thioredoxin[m1_c] => m1_dGDP[m1_c] + m1_H2O[m1_c] + m1_oxidized thioredoxin[m1_c]'	0	0	0	NaN	NaN	'm1_Purine metabolism'	'm1_Rrm1(lgFC:-0.22412FDR:0.74699) or m1_Rrm2(lgFC:0.32191FDR:0.88747) or m1_Rrm2b(lgFC:-0.10506FDR:0.97019) or m1_Txn1(lgFC:-0.29546FDR:0.26076)'
'm1_HMR_4617'	'm1_CTP[m1_c] + m1_thioredoxin[m1_c] => m1_dCTP[m1_c] + m1_H2O[m1_c] + m1_oxidized thioredoxin[m1_c]'	0	0	0	NaN	NaN	'm1_Purine metabolism'	'm1_Rrm1(lgFC:-0.22412FDR:0.74699) or m1_Rrm2(lgFC:0.32191FDR:0.88747) or m1_Rrm2b(lgFC:-0.10506FDR:0.97019) or m1_Txn1(lgFC:-0.29546FDR:0.26076)'
'm1_HMR_4618'	'm1_thioredoxin[m1_c] + m1_UTP[m1_c] => m1_dUTP[m1_c] + m1_H2O[m1_c] + m1_oxidized thioredoxin[m1_c]'	0	0	0	NaN	NaN	'm1_Purine metabolism'	'm1_Rrm1(lgFC:-0.22412FDR:0.74699) or m1_Rrm2(lgFC:0.32191FDR:0.88747) or m1_Rrm2b(lgFC:-0.10506FDR:0.97019) or m1_Txn1(lgFC:-0.29546FDR:0.26076)'
'm1_HMR_4619'	'm1_CDP[m1_c] + m1_thioredoxin[m1_c] => m1_dCDP[m1_c] + m1_H2O[m1_c] + m1_oxidized thioredoxin[m1_c]'	0	0	0	NaN	NaN	'm1_Purine metabolism'	'm1_Rrm1(lgFC:-0.22412FDR:0.74699) or m1_Rrm2(lgFC:0.32191FDR:0.88747) or m1_Rrm2b(lgFC:-0.10506FDR:0.97019) or m1_Txn1(lgFC:-0.29546FDR:0.26076)'
'm1_HMR_4621'	'm1_thioredoxin[m1_c] + m1_UDP[m1_c] => m1_dUDP[m1_c] + m1_H2O[m1_c] + m1_oxidized thioredoxin[m1_c]'	0	0	0	NaN	NaN	'm1_Purine metabolism'	'm1_Rrm1(lgFC:-0.22412FDR:0.74699) or m1_Rrm2(lgFC:0.32191FDR:0.88747) or m1_Rrm2b(lgFC:-0.10506FDR:0.97019) or m1_Txn1(lgFC:-0.29546FDR:0.26076)'
'm1_HMR_4632'	'm1_dAMP[m1_c] + m1_H2O[m1_c] => m1_deoxyadenosine[m1_c] + m1_Pi[m1_c]'	0	0	0	NaN	NaN	'm1_Purine metabolism'	'm1_Acpp(lgFC:0.19062FDR:1) or m1_Nt5c(lgFC:-0.24491FDR:0.7274) or m1_Nt5c2(lgFC:-0.044429FDR:1) or m1_Nt5c3(lgFC:-0.090043FDR:0.97516) or m1_Nt5c3b(lgFC:-0.096755FDR:0.99096) or m1_Nt5e(lgFC:0.66281FDR:0.38059) or m1_Nt5m(lgFC:-0.059078FDR:1)'
'm1_HMR_4646'	'm1_H2O[m1_c] + m1_NAD+[m1_c] + m1_xanthine[m1_c] => m1_H+[m1_c] + m1_NADH[m1_c] + m1_urate[m1_c]'	-2.74003e-13	0	2.74003e-13	1	-3.90444e-13	'm1_Purine metabolism'	''
'm1_HMR_4648'	'm1_H2O[m1_p] + m1_NAD+[m1_p] + m1_xanthine[m1_p] => m1_H+[m1_p] + m1_NADH[m1_p] + m1_urate[m1_p]'	0	0	0	NaN	NaN	'm1_Purine metabolism'	''
'm1_HMR_4649'	'm1_H2O[m1_c] + m1_O2[m1_c] + m1_xanthine[m1_c] => m1_H2O2[m1_c] + m1_urate[m1_c]'	0	0	0	NaN	NaN	'm1_Purine metabolism'	''
'm1_HMR_4650'	'm1_H2O[m1_p] + m1_O2[m1_p] + m1_xanthine[m1_p] => m1_H2O2[m1_p] + m1_urate[m1_p]'	0	0	0	NaN	NaN	'm1_Purine metabolism'	''
'm1_HMR_4651'	'm1_guanosine[m1_c] + m1_Pi[m1_c] <=> m1_guanine[m1_c] + m1_ribose-1-phosphate[m1_c]'	0	2.70235e-13	2.70235e-13	NaN	NaN	'm1_Purine metabolism'	'm1_Pnp(lgFC:0.21237FDR:0.78747)'
'm1_HMR_4663'	'm1_Pi[m1_c] + m1_xanthosine[m1_c] <=> m1_ribose-1-phosphate[m1_c] + m1_xanthine[m1_c]'	0	0	0	NaN	NaN	'm1_Purine metabolism'	'm1_Pnp(lgFC:0.21237FDR:0.78747)'
'm1_HMR_4664'	'm1_PRPP[m1_c] + m1_xanthine[m1_c] => m1_PPi[m1_c] + m1_xanthosine-5-phosphate[m1_c]'	2.74003e-13	0	2.74003e-13	NaN	NaN	'm1_Purine metabolism'	''
'm1_HMR_4694'	'm1_deoxyadenosine[m1_c] + m1_H2O[m1_c] => m1_deoxyinosine[m1_c] + m1_NH3[m1_c]'	0	0	0	NaN	NaN	'm1_Purine metabolism'	'm1_Ada(lgFC:-0.55239FDR:0.8001)'
'm1_HMR_4695'	'm1_2-deoxy-D-ribose-1-phosphate[m1_c] + m1_adenine[m1_c] <=> m1_deoxyadenosine[m1_c] + m1_Pi[m1_c]'	0	0	0	NaN	NaN	'm1_Purine metabolism'	'm1_Pnp(lgFC:0.21237FDR:0.78747) or m1_Tymp(lgFC:0.24669FDR:0.95515)'
'm1_HMR_4705'	'm1_H2O[m1_c] + m1_xanthosine-5-phosphate[m1_c] => m1_Pi[m1_c] + m1_xanthosine[m1_c]'	0	0	0	NaN	NaN	'm1_Purine metabolism'	'm1_Acpp(lgFC:0.19062FDR:1) or m1_Nt5c(lgFC:-0.24491FDR:0.7274) or m1_Nt5c2(lgFC:-0.044429FDR:1) or m1_Nt5c3(lgFC:-0.090043FDR:0.97516) or m1_Nt5c3b(lgFC:-0.096755FDR:0.99096) or m1_Nt5e(lgFC:0.66281FDR:0.38059) or m1_Nt5m(lgFC:-0.059078FDR:1)'
'm1_HMR_4709'	'm1_2-deoxy-D-ribose-1-phosphate[m1_c] + m1_hypoxanthine[m1_c] <=> m1_deoxyinosine[m1_c] + m1_Pi[m1_c]'	0	0	0	NaN	NaN	'm1_Purine metabolism'	'm1_Pnp(lgFC:0.21237FDR:0.78747) or m1_Tymp(lgFC:0.24669FDR:0.95515)'
'm1_HMR_4799'	'm1_5-phosphoribosylamine[m1_c] + m1_ATP[m1_c] + m1_glycine[m1_c] => m1_ADP[m1_c] + m1_GAR[m1_c] + m1_Pi[m1_c]'	0	0	0	NaN	0	'm1_Purine metabolism'	'm1_Gart(lgFC:-0.51812FDR:0.44374)'
'm1_HMR_4802'	'm1_5-phosphoribosylformylglycinamidine[m1_c] + m1_ATP[m1_c] => m1_ADP[m1_c] + m1_AIR[m1_c] + m1_Pi[m1_c]'	0	0	0	NaN	0	'm1_Purine metabolism'	'm1_Gart(lgFC:-0.51812FDR:0.44374)'
'm1_HMR_4804'	'm1_5-phosphoribosyl-4-carboxy-5-aminoimidazole[m1_c] <=> m1_AIR[m1_c] + m1_CO2[m1_c]'	0	0	0	NaN	0	'm1_Purine metabolism'	'm1_Paics(lgFC:-0.33389FDR:0.050645)'
'm1_HMR_4808'	'm1_ATP[m1_c] + m1_glutamine[m1_c] + m1_H2O[m1_c] + m1_N-formyl-GAR[m1_c] => m1_5-phosphoribosylformylglycinamidine[m1_c] + m1_ADP[m1_c] + m1_glutamate[m1_c] + m1_Pi[m1_c]'	0	0	0	NaN	NaN	'm1_Purine metabolism'	'm1_Pfas(lgFC:0.1203FDR:0.99201)'
'm1_HMR_4810'	'm1_5-phosphoribosyl-4-carboxy-5-aminoimidazole[m1_c] + m1_aspartate[m1_c] + m1_ATP[m1_c] => m1_ADP[m1_c] + m1_Pi[m1_c] + m1_SAICAR[m1_c]'	0	0	0	NaN	0	'm1_Purine metabolism'	'm1_Paics(lgFC:-0.33389FDR:0.050645)'
'm1_HMR_4812'	'm1_AICAR[m1_c] + m1_fumarate[m1_c] <=> m1_SAICAR[m1_c]'	0	0	0	NaN	NaN	'm1_Purine metabolism'	'm1_Adsl(lgFC:-0.22896FDR:0.84671) or m1_Tnrc6b(lgFC:0.10411FDR:0.90774)'
'm1_HMR_4814'	'm1_10-formyl-THF[m1_c] + m1_AICAR[m1_c] <=> m1_FAICAR[m1_c] + m1_THF[m1_c]'	0	0	0	NaN	NaN	'm1_Purine metabolism'	'm1_Atic(lgFC:-0.13021FDR:0.76764)'
'm1_HMR_5301'	'm1_GTP[m1_c] + m1_uridine[m1_c] => m1_GDP[m1_c] + m1_UMP[m1_c]'	0.0118564	0	0.0118564	1.00344	0.0118971	'm1_Purine metabolism'	'm1_Uck1(lgFC:0.22281FDR:0.87549) or m1_Uck2(lgFC:-0.19846FDR:0.91841) or m1_Uckl1(lgFC:0.01002FDR:1)'
'm1_HMR_5353'	'm1_ADP[m1_c] + m1_dGDP[m1_c] <=> m1_ATP[m1_c] + m1_dGMP[m1_c]'	0	0	0	NaN	NaN	'm1_Purine metabolism'	'm1_Guk1(lgFC:0.30215FDR:0.55721)'
'm1_HMR_6601'	'm1_allantoate[m1_c] + m1_H2O[m1_c] => m1_urea[m1_c] + m1_ureidoglycolate[m1_c]'	0	0	0	NaN	NaN	'm1_Purine metabolism'	''
'm1_HMR_6602'	'm1_H2O2[m1_c] + m1_urate[m1_c] <=> m1_alloxan[m1_c] + m1_urea[m1_c]'	0	0	0	NaN	-3.8384e-13	'm1_Purine metabolism'	'm1_Prdx6(lgFC:-0.17512FDR:0.82761) or m1_Pxdn(lgFC:-0.36541FDR:0.93689)'
'm1_HMR_6603'	'm1_H2O2[m1_s] + m1_urate[m1_s] <=> m1_alloxan[m1_s] + m1_urea[m1_s]'	0	0	0	NaN	3.8384e-13	'm1_Purine metabolism'	'm1_Prdx6(lgFC:-0.17512FDR:0.82761) or m1_Pxdn(lgFC:-0.36541FDR:0.93689)'
'm1_HMR_6605'	'm1_H2O[m1_c] + m1_urate radical[m1_c] <=> m1_hydroxide[m1_c] + m1_urate[m1_c]'	0	0	0	NaN	NaN	'm1_Purine metabolism'	''
'm1_HMR_6606'	'm1_ascorbate[m1_c] + m1_urate radical[m1_c] <=> m1_monodehydroascorbate[m1_c] + m1_urate[m1_c]'	0	0	0	NaN	NaN	'm1_Purine metabolism'	''
'm1_HMR_6607'	'm1_H2O[m1_c] + m1_urate radical[m1_c] <=> m1_hydroxyl radical[m1_c] + m1_urate[m1_c]'	0	0	0	NaN	NaN	'm1_Purine metabolism'	''
'm1_HMR_6609'	'm1_allantoin[m1_c] + m1_H2O[m1_c] <=> m1_allantoate[m1_c]'	0	0	0	NaN	NaN	'm1_Purine metabolism'	''
'm1_HMR_6610'	'm1_5-hydroxyisourate[m1_c] + m1_H2O[m1_c] => m1_allantoin[m1_c] + m1_CO2[m1_c]'	0	0	0	NaN	NaN	'm1_Purine metabolism'	''
'm1_HMR_6611'	'm1_H2O[m1_c] + m1_O2[m1_c] + m1_urate[m1_c] => m1_5-hydroxyisourate[m1_c] + m1_H2O2[m1_c]'	0	0	0	NaN	NaN	'm1_Purine metabolism'	''
'm1_HMR_7144'	'm1_ADP-ribose[m1_c] + m1_H2O[m1_c] => m1_AMP[m1_c] + m1_ribose-5-phosphate[m1_c]'	0	0	0	NaN	NaN	'm1_Purine metabolism'	'm1_Nudt5(lgFC:0.19454FDR:0.76893)'
'm1_HMR_8755'	'm1_H2O[m1_p] + m1_hypoxanthine[m1_p] + m1_O2[m1_p] => m1_H2O2[m1_p] + m1_xanthine[m1_p]'	0	0	0	NaN	NaN	'm1_Purine metabolism'	''
'm1_HMR_9797'	'm1_adenine[m1_c] + m1_H2O[m1_c] => m1_hypoxanthine[m1_c] + m1_NH3[m1_c]'	0	0	0	NaN	NaN	'm1_Purine metabolism'	''
'm1_HMR_4016'	'm1_ADP[m1_c] + m1_GTP[m1_c] <=> m1_ATP[m1_c] + m1_GDP[m1_c]'	0	0	0	NaN	NaN	'm1_Purine metabolism'	'm1_Nme1(lgFC:-0.097998FDR:0.93886) or m1_Nme2(lgFC:0.036844FDR:1) or m1_Nme3(lgFC:-0.55194FDR:0.39641) or m1_Nme4(lgFC:-0.093277FDR:1) or m1_Nme6(lgFC:-0.30301FDR:0.7942) or m1_Nme7(lgFC:-0.095366FDR:0.99256)'
'm1_HMR_4018'	'm1_ADP[m1_m] + m1_GTP[m1_m] <=> m1_ATP[m1_m] + m1_GDP[m1_m]'	0	0	0	NaN	NaN	'm1_Purine metabolism'	'm1_Nme1(lgFC:-0.097998FDR:0.93886) or m1_Nme2(lgFC:0.036844FDR:1) or m1_Nme3(lgFC:-0.55194FDR:0.39641) or m1_Nme4(lgFC:-0.093277FDR:1) or m1_Nme6(lgFC:-0.30301FDR:0.7942) or m1_Nme7(lgFC:-0.095366FDR:0.99256)'
'm1_HMR_4044'	'm1_ADP[m1_c] + m1_dATP[m1_c] <=> m1_ATP[m1_c] + m1_dADP[m1_c]'	0	0	0	NaN	NaN	'm1_Purine metabolism'	'm1_Nme1(lgFC:-0.097998FDR:0.93886) or m1_Nme2(lgFC:0.036844FDR:1) or m1_Nme3(lgFC:-0.55194FDR:0.39641) or m1_Nme4(lgFC:-0.093277FDR:1) or m1_Nme6(lgFC:-0.30301FDR:0.7942) or m1_Nme7(lgFC:-0.095366FDR:0.99256)'
'm1_HMR_4291'	'm1_ADP[m1_c] + m1_ITP[m1_c] <=> m1_ATP[m1_c] + m1_IDP[m1_c]'	0	0	0	NaN	NaN	'm1_Purine metabolism'	'm1_Nme1(lgFC:-0.097998FDR:0.93886) or m1_Nme2(lgFC:0.036844FDR:1) or m1_Nme3(lgFC:-0.55194FDR:0.39641) or m1_Nme4(lgFC:-0.093277FDR:1) or m1_Nme6(lgFC:-0.30301FDR:0.7942) or m1_Nme7(lgFC:-0.095366FDR:0.99256)'
'm1_HMR_4420'	'm1_ADP[m1_m] + m1_dATP[m1_m] <=> m1_ATP[m1_m] + m1_dADP[m1_m]'	0	0.00321366	0.00321366	NaN	NaN	'm1_Purine metabolism'	'm1_Nme1(lgFC:-0.097998FDR:0.93886) or m1_Nme2(lgFC:0.036844FDR:1) or m1_Nme3(lgFC:-0.55194FDR:0.39641) or m1_Nme4(lgFC:-0.093277FDR:1) or m1_Nme6(lgFC:-0.30301FDR:0.7942) or m1_Nme7(lgFC:-0.095366FDR:0.99256)'
'm1_HMR_4570'	'm1_ADP[m1_c] + m1_dGTP[m1_c] <=> m1_ATP[m1_c] + m1_dGDP[m1_c]'	0	0	0	NaN	NaN	'm1_Purine metabolism'	'm1_Nme1(lgFC:-0.097998FDR:0.93886) or m1_Nme2(lgFC:0.036844FDR:1) or m1_Nme3(lgFC:-0.55194FDR:0.39641) or m1_Nme4(lgFC:-0.093277FDR:1) or m1_Nme6(lgFC:-0.30301FDR:0.7942) or m1_Nme7(lgFC:-0.095366FDR:0.99256)'
'm1_HMR_4572'	'm1_ADP[m1_m] + m1_dGTP[m1_m] <=> m1_ATP[m1_m] + m1_dGDP[m1_m]'	0	0	0	NaN	NaN	'm1_Purine metabolism'	'm1_Nme1(lgFC:-0.097998FDR:0.93886) or m1_Nme2(lgFC:0.036844FDR:1) or m1_Nme3(lgFC:-0.55194FDR:0.39641) or m1_Nme4(lgFC:-0.093277FDR:1) or m1_Nme6(lgFC:-0.30301FDR:0.7942) or m1_Nme7(lgFC:-0.095366FDR:0.99256)'
'm1_HMR_4006'	'm1_ADP[m1_c] + m1_UTP[m1_c] <=> m1_ATP[m1_c] + m1_UDP[m1_c]'	0	0	0	NaN	NaN	'm1_Pyrimidine metabolism'	'm1_Nme1(lgFC:-0.097998FDR:0.93886) or m1_Nme2(lgFC:0.036844FDR:1) or m1_Nme3(lgFC:-0.55194FDR:0.39641) or m1_Nme4(lgFC:-0.093277FDR:1) or m1_Nme6(lgFC:-0.30301FDR:0.7942) or m1_Nme7(lgFC:-0.095366FDR:0.99256)'
'm1_HMR_4028'	'm1_ADP[m1_c] + m1_CTP[m1_c] <=> m1_ATP[m1_c] + m1_CDP[m1_c]'	0	0	0	NaN	NaN	'm1_Pyrimidine metabolism'	'm1_Nme1(lgFC:-0.097998FDR:0.93886) or m1_Nme2(lgFC:0.036844FDR:1) or m1_Nme3(lgFC:-0.55194FDR:0.39641) or m1_Nme4(lgFC:-0.093277FDR:1) or m1_Nme6(lgFC:-0.30301FDR:0.7942) or m1_Nme7(lgFC:-0.095366FDR:0.99256)'
'm1_HMR_4030'	'm1_ADP[m1_m] + m1_CTP[m1_m] <=> m1_ATP[m1_m] + m1_CDP[m1_m]'	0	0	0	NaN	NaN	'm1_Pyrimidine metabolism'	'm1_Nme1(lgFC:-0.097998FDR:0.93886) or m1_Nme2(lgFC:0.036844FDR:1) or m1_Nme3(lgFC:-0.55194FDR:0.39641) or m1_Nme4(lgFC:-0.093277FDR:1) or m1_Nme6(lgFC:-0.30301FDR:0.7942) or m1_Nme7(lgFC:-0.095366FDR:0.99256)'
'm1_HMR_4670'	'm1_ADP[m1_c] + m1_dCTP[m1_c] <=> m1_ATP[m1_c] + m1_dCDP[m1_c]'	0	0	0	NaN	NaN	'm1_Pyrimidine metabolism'	'm1_Nme1(lgFC:-0.097998FDR:0.93886) or m1_Nme2(lgFC:0.036844FDR:1) or m1_Nme3(lgFC:-0.55194FDR:0.39641) or m1_Nme4(lgFC:-0.093277FDR:1) or m1_Nme6(lgFC:-0.30301FDR:0.7942) or m1_Nme7(lgFC:-0.095366FDR:0.99256)'
'm1_HMR_4673'	'm1_ADP[m1_c] + m1_dUTP[m1_c] <=> m1_ATP[m1_c] + m1_dUDP[m1_c]'	0	0	0	NaN	NaN	'm1_Pyrimidine metabolism'	'm1_Nme1(lgFC:-0.097998FDR:0.93886) or m1_Nme2(lgFC:0.036844FDR:1) or m1_Nme3(lgFC:-0.55194FDR:0.39641) or m1_Nme4(lgFC:-0.093277FDR:1) or m1_Nme6(lgFC:-0.30301FDR:0.7942) or m1_Nme7(lgFC:-0.095366FDR:0.99256)'
'm1_HMR_4675'	'm1_ATP[m1_m] + m1_dUDP[m1_m] <=> m1_ADP[m1_m] + m1_dUTP[m1_m]'	0	0	0	NaN	NaN	'm1_Pyrimidine metabolism'	'm1_Nme1(lgFC:-0.097998FDR:0.93886) or m1_Nme2(lgFC:0.036844FDR:1) or m1_Nme3(lgFC:-0.55194FDR:0.39641) or m1_Nme4(lgFC:-0.093277FDR:1) or m1_Nme6(lgFC:-0.30301FDR:0.7942) or m1_Nme7(lgFC:-0.095366FDR:0.99256)'
'm1_HMR_6614'	'm1_dADP[m1_c] + m1_dTTP[m1_c] <=> m1_dATP[m1_c] + m1_dTDP[m1_c]'	0	-16.0098	16.0098	NaN	NaN	'm1_Pyrimidine metabolism'	'm1_Nme1(lgFC:-0.097998FDR:0.93886) or m1_Nme2(lgFC:0.036844FDR:1) or m1_Nme3(lgFC:-0.55194FDR:0.39641) or m1_Nme4(lgFC:-0.093277FDR:1) or m1_Nme6(lgFC:-0.30301FDR:0.7942) or m1_Nme7(lgFC:-0.095366FDR:0.99256)'
'm1_HMR_6615'	'm1_dADP[m1_m] + m1_dTTP[m1_m] <=> m1_dATP[m1_m] + m1_dTDP[m1_m]'	0	0	0	NaN	NaN	'm1_Pyrimidine metabolism'	'm1_Nme1(lgFC:-0.097998FDR:0.93886) or m1_Nme2(lgFC:0.036844FDR:1) or m1_Nme3(lgFC:-0.55194FDR:0.39641) or m1_Nme4(lgFC:-0.093277FDR:1) or m1_Nme6(lgFC:-0.30301FDR:0.7942) or m1_Nme7(lgFC:-0.095366FDR:0.99256)'
'm1_HMR_6616'	'm1_dADP[m1_n] + m1_dTTP[m1_n] <=> m1_dATP[m1_n] + m1_dTDP[m1_n]'	0	0	0	NaN	NaN	'm1_Pyrimidine metabolism'	'm1_Nme1(lgFC:-0.097998FDR:0.93886) or m1_Nme2(lgFC:0.036844FDR:1) or m1_Nme3(lgFC:-0.55194FDR:0.39641) or m1_Nme4(lgFC:-0.093277FDR:1) or m1_Nme6(lgFC:-0.30301FDR:0.7942) or m1_Nme7(lgFC:-0.095366FDR:0.99256)'
'm1_HMR_4635'	'm1_ADP[m1_c] + m1_dTTP[m1_c] <=> m1_ATP[m1_c] + m1_dTDP[m1_c]'	0	0	0	NaN	NaN	'm1_Nucleotide metabolism'	'm1_Nme1(lgFC:-0.097998FDR:0.93886) or m1_Nme2(lgFC:0.036844FDR:1) or m1_Nme3(lgFC:-0.55194FDR:0.39641) or m1_Nme4(lgFC:-0.093277FDR:1) or m1_Nme6(lgFC:-0.30301FDR:0.7942) or m1_Nme7(lgFC:-0.095366FDR:0.99256)'
'm1_HMR_3793'	'm1_2-methyl-3-oxopropanoate[m1_m] + m1_alanine[m1_m] <=> m1_D-3-amino-isobutanoate[m1_m] + m1_pyruvate[m1_m]'	0	1.28272	1.28272	NaN	NaN	'm1_Pyrimidine metabolism'	'm1_Agxt2(lgFC:0.18349FDR:0.95006)'
'm1_HMR_3931'	'm1_H+[m1_c] + m1_NADPH[m1_c] + m1_oxidized thioredoxin[m1_c] => m1_NADP+[m1_c] + m1_thioredoxin[m1_c]'	0	0	0	NaN	NaN	'm1_Pyrimidine metabolism'	'm1_Txnrd1(lgFC:-0.075994FDR:0.97204) or m1_Txnrd2(lgFC:-0.037219FDR:1) or m1_Txnrd3(lgFC:-0.13103FDR:0.92145)'
'm1_HMR_3969'	'm1_ITP[m1_c] + m1_uridine[m1_c] => m1_IDP[m1_c] + m1_UMP[m1_c]'	0	0	0	NaN	NaN	'm1_Pyrimidine metabolism'	'm1_Uck1(lgFC:0.22281FDR:0.87549) or m1_Uck2(lgFC:-0.19846FDR:0.91841)'
'm1_HMR_3970'	'm1_H2O[m1_c] + m1_UMP[m1_c] => m1_Pi[m1_c] + m1_uridine[m1_c]'	0	0	0	NaN	NaN	'm1_Pyrimidine metabolism'	'm1_Nt5c3(lgFC:-0.090043FDR:0.97516)'
'm1_HMR_4008'	'm1_ADP[m1_c] + m1_UDP[m1_c] <=> m1_ATP[m1_c] + m1_UMP[m1_c]'	0	0	0	1.07116	NaN	'm1_Pyrimidine metabolism'	'm1_Cmpk1(lgFC:0.22743FDR:0.58323)'
'm1_HMR_4032'	'm1_ATP[m1_c] + m1_NH3[m1_c] + m1_UTP[m1_c] => m1_ADP[m1_c] + m1_CTP[m1_c] + m1_Pi[m1_c]'	1	0	1	NaN	1.54256	'm1_Pyrimidine metabolism'	'm1_Ctps(lgFC:1.0731FDR:0.0067911) or m1_Ctps2(lgFC:-0.14954FDR:0.88496)'
'm1_HMR_4034'	'2 m1_ATP[m1_c] + m1_glutamine[m1_c] + m1_H+[m1_c] + m1_H2O[m1_c] + m1_HCO3-[m1_c] => 2 m1_ADP[m1_c] + m1_carbamoyl-phosphate[m1_c] + m1_glutamate[m1_c] + m1_Pi[m1_c]'	0	0	0	NaN	NaN	'm1_Pyrimidine metabolism'	'm1_Cad(lgFC:0.08336FDR:1)'
'm1_HMR_4036'	'm1_orotidine-5-phosphate[m1_c] => m1_CO2[m1_c] + m1_UMP[m1_c]'	0	0	0	NaN	NaN	'm1_Pyrimidine metabolism'	'm1_Umps(lgFC:-0.32963FDR:0.72532)'
'm1_HMR_4050'	'm1_N-carbamoyl-L-aspartate[m1_c] + m1_Pi[m1_c] <=> m1_aspartate[m1_c] + m1_carbamoyl-phosphate[m1_c]'	0	0	0	NaN	NaN	'm1_Pyrimidine metabolism'	'm1_Cad(lgFC:0.08336FDR:1)'
'm1_HMR_4056'	'm1_dTMP[m1_c] + m1_H2O[m1_c] => m1_Pi[m1_c] + m1_thymidine[m1_c]'	0	0	0	NaN	NaN	'm1_Pyrimidine metabolism'	'm1_Acpp(lgFC:0.19062FDR:1) or m1_Nt5c(lgFC:-0.24491FDR:0.7274) or m1_Nt5c2(lgFC:-0.044429FDR:1) or m1_Nt5c3(lgFC:-0.090043FDR:0.97516) or m1_Nt5c3b(lgFC:-0.096755FDR:0.99096) or m1_Nt5e(lgFC:0.66281FDR:0.38059) or m1_Nt5m(lgFC:-0.059078FDR:1)'
'm1_HMR_4059'	'm1_H2O[m1_r] + m1_UDP[m1_r] => m1_Pi[m1_r] + m1_UMP[m1_r]'	0	0	0	NaN	NaN	'm1_Pyrimidine metabolism'	'm1_Cant1(lgFC:0.00054726FDR:1) or m1_Entpd1(lgFC:-0.65711FDR:0.33817) or m1_Entpd2(lgFC:-0.53541FDR:0.56275) or m1_Entpd4(lgFC:-0.065582FDR:1) or m1_Entpd5(lgFC:0.037161FDR:1) or m1_Entpd6(lgFC:-0.091637FDR:0.9879) or m1_Entpd8(lgFC:-0.18924FDR:1)'
'm1_HMR_4060'	'm1_H2O[m1_s] + m1_UDP[m1_s] => m1_Pi[m1_s] + m1_UMP[m1_s]'	0	0	0	NaN	NaN	'm1_Pyrimidine metabolism'	'm1_Cant1(lgFC:0.00054726FDR:1) or m1_Entpd1(lgFC:-0.65711FDR:0.33817) or m1_Entpd2(lgFC:-0.53541FDR:0.56275) or m1_Entpd4(lgFC:-0.065582FDR:1) or m1_Entpd5(lgFC:0.037161FDR:1) or m1_Entpd6(lgFC:-0.091637FDR:0.9879) or m1_Entpd8(lgFC:-0.18924FDR:1)'
'm1_HMR_4127'	'm1_H2O[m1_c] + m1_UDP-glucose[m1_c] => m1_glucose-1-phosphate[m1_c] + m1_UMP[m1_c]'	0	0	0	NaN	NaN	'm1_Pyrimidine metabolism'	'm1_Enpp3(lgFC:-0.14063FDR:0.98278) or m1_Nudt14(lgFC:0.0077391FDR:1)'
'm1_HMR_4177'	'm1_CMP[m1_c] + m1_H2O[m1_c] => m1_cytidine[m1_c] + m1_Pi[m1_c]'	0	0	0	NaN	NaN	'm1_Pyrimidine metabolism'	'm1_Acpp(lgFC:0.19062FDR:1) or m1_Nt5c(lgFC:-0.24491FDR:0.7274) or m1_Nt5c2(lgFC:-0.044429FDR:1) or m1_Nt5c3(lgFC:-0.090043FDR:0.97516) or m1_Nt5c3b(lgFC:-0.096755FDR:0.99096) or m1_Nt5e(lgFC:0.66281FDR:0.38059) or m1_Nt5m(lgFC:-0.059078FDR:1)'
'm1_HMR_4179'	'm1_CMP[m1_s] + m1_H2O[m1_s] => m1_cytidine[m1_s] + m1_Pi[m1_s]'	0	0	0	NaN	NaN	'm1_Pyrimidine metabolism'	'm1_Acpp(lgFC:0.19062FDR:1) or m1_Nt5c(lgFC:-0.24491FDR:0.7274) or m1_Nt5c2(lgFC:-0.044429FDR:1) or m1_Nt5c3(lgFC:-0.090043FDR:0.97516) or m1_Nt5c3b(lgFC:-0.096755FDR:0.99096) or m1_Nt5e(lgFC:0.66281FDR:0.38059) or m1_Nt5m(lgFC:-0.059078FDR:1)'
'm1_HMR_4182'	'm1_cytidine[m1_c] + m1_GTP[m1_c] => m1_CMP[m1_c] + m1_GDP[m1_c]'	0	0	0	NaN	NaN	'm1_Pyrimidine metabolism'	'm1_Fam20b(lgFC:0.1655FDR:0.84186)'
'm1_HMR_4183'	'm1_CDP[m1_s] + m1_H2O[m1_s] => m1_CMP[m1_s] + m1_Pi[m1_s]'	0	0	0	NaN	NaN	'm1_Pyrimidine metabolism'	'm1_Entpd1(lgFC:-0.65711FDR:0.33817) or m1_Entpd8(lgFC:-0.18924FDR:1)'
'm1_HMR_4192'	'm1_CTP[m1_s] + m1_H2O[m1_s] => m1_CDP[m1_s] + m1_Pi[m1_s]'	0	0	0	NaN	NaN	'm1_Pyrimidine metabolism'	'm1_Entpd1(lgFC:-0.65711FDR:0.33817) or m1_Entpd8(lgFC:-0.18924FDR:1)'
'm1_HMR_4194'	'm1_ATP[m1_c] + m1_glutamine[m1_c] + m1_H2O[m1_c] + m1_UTP[m1_c] => m1_ADP[m1_c] + m1_CTP[m1_c] + m1_glutamate[m1_c] + m1_Pi[m1_c]'	1	0	1	NaN	1.54256	'm1_Pyrimidine metabolism'	'm1_Ctps(lgFC:1.0731FDR:0.0067911) or m1_Ctps2(lgFC:-0.14954FDR:0.88496)'
'm1_HMR_4211'	'm1_H2O[m1_c] + m1_UTP[m1_c] => m1_PPi[m1_c] + m1_UMP[m1_c]'	0	0	0	NaN	NaN	'm1_Pyrimidine metabolism'	'm1_Itpa(lgFC:0.31896FDR:0.28205)'
'm1_HMR_4343'	'm1_PRPP[m1_c] + m1_uracil[m1_c] => m1_PPi[m1_c] + m1_UMP[m1_c]'	0	0.00311121	0.00311121	NaN	NaN	'm1_Pyrimidine metabolism'	''
'm1_HMR_4345'	'm1_5,6-Dihydrouracil[m1_c] + m1_NADP+[m1_c] <=> m1_H+[m1_c] + m1_NADPH[m1_c] + m1_uracil[m1_c]'	0	0	0	NaN	-3.91112e-13	'm1_Pyrimidine metabolism'	'm1_Dpyd(lgFC:0.12267FDR:0.99096)'
'm1_HMR_4346'	'm1_5,6-Dihydrouracil[m1_c] + m1_H2O[m1_c] => m1_3-ureidopropionate[m1_c]'	0	0	0	NaN	3.65962e-13	'm1_Pyrimidine metabolism'	'm1_Dpys(lgFC:0.05777FDR:1) or m1_Dpysl2(lgFC:0.030554FDR:1) or m1_Dpysl3(lgFC:-0.74397FDR:0.52679)'
'm1_HMR_4472'	'm1_H+[m1_c] + m1_NADPH[m1_c] + m1_thymine[m1_c] <=> m1_dihydrothymine[m1_c] + m1_NADP+[m1_c]'	0	0	0	NaN	NaN	'm1_Pyrimidine metabolism'	'm1_Dpyd(lgFC:0.12267FDR:0.99096)'
'm1_HMR_4484'	'm1_dTMP[m1_m] + m1_H2O[m1_m] => m1_Pi[m1_m] + m1_thymidine[m1_m]'	0	0	0	NaN	NaN	'm1_Pyrimidine metabolism'	'm1_Acpp(lgFC:0.19062FDR:1) or m1_Nt5c(lgFC:-0.24491FDR:0.7274) or m1_Nt5c2(lgFC:-0.044429FDR:1) or m1_Nt5c3(lgFC:-0.090043FDR:0.97516) or m1_Nt5c3b(lgFC:-0.096755FDR:0.99096) or m1_Nt5e(lgFC:0.66281FDR:0.38059) or m1_Nt5m(lgFC:-0.059078FDR:1)'
'm1_HMR_4485'	'm1_2-deoxy-D-ribose-1-phosphate[m1_c] + m1_thymine[m1_c] <=> m1_Pi[m1_c] + m1_thymidine[m1_c]'	0	0	0	NaN	NaN	'm1_Pyrimidine metabolism'	'm1_Pnp(lgFC:0.21237FDR:0.78747) or m1_Tymp(lgFC:0.24669FDR:0.95515)'
'm1_HMR_4510'	'm1_dCMP[m1_c] + m1_H2O[m1_c] => m1_deoxycytidine[m1_c] + m1_Pi[m1_c]'	0	0	0	NaN	NaN	'm1_Pyrimidine metabolism'	'm1_Acpp(lgFC:0.19062FDR:1) or m1_Nt5c(lgFC:-0.24491FDR:0.7274) or m1_Nt5c2(lgFC:-0.044429FDR:1) or m1_Nt5c3(lgFC:-0.090043FDR:0.97516) or m1_Nt5c3b(lgFC:-0.096755FDR:0.99096) or m1_Nt5e(lgFC:0.66281FDR:0.38059) or m1_Nt5m(lgFC:-0.059078FDR:1)'
'm1_HMR_4512'	'm1_ADP[m1_c] + m1_dCDP[m1_c] <=> m1_ATP[m1_c] + m1_dCMP[m1_c]'	0	0	0	NaN	NaN	'm1_Pyrimidine metabolism'	'm1_Cmpk1(lgFC:0.22743FDR:0.58323)'
'm1_HMR_4513'	'm1_ATP[m1_c] + m1_deoxycytidine[m1_c] => m1_ADP[m1_c] + m1_dCMP[m1_c]'	0	0	0	NaN	NaN	'm1_Pyrimidine metabolism'	'm1_Dck(lgFC:-0.29032FDR:0.84845)'
'm1_HMR_4514'	'm1_deoxycytidine[m1_c] + m1_H2O[m1_c] => m1_deoxyuridine[m1_c] + m1_NH3[m1_c]'	1	0	1	NaN	1.3434	'm1_Pyrimidine metabolism'	'm1_Cda(lgFC:1.1128FDR:0.70464)'
'm1_HMR_4577'	'm1_orotidine-5-phosphate[m1_c] + m1_PPi[m1_c] <=> m1_orotate[m1_c] + m1_PRPP[m1_c]'	0	0	0	NaN	NaN	'm1_Pyrimidine metabolism'	'm1_Umps(lgFC:-0.32963FDR:0.72532)'
'm1_HMR_4579'	'm1_Pi[m1_c] + m1_uridine[m1_c] <=> m1_ribose-1-phosphate[m1_c] + m1_uracil[m1_c]'	0	0.011613	0.011613	NaN	3.78269e-13	'm1_Pyrimidine metabolism'	'm1_Upp1(lgFC:-0.47978FDR:0.91605) or m1_Upp2(lgFC:-0.88859FDR:0.91221)'
'm1_HMR_4580'	'm1_cytidine[m1_c] + m1_H2O[m1_c] => m1_NH3[m1_c] + m1_uridine[m1_c]'	1	0	1	NaN	1.3434	'm1_Pyrimidine metabolism'	'm1_Cda(lgFC:1.1128FDR:0.70464)'
'm1_HMR_4608'	'm1_(S)-dihydroorotate[m1_c] + m1_H2O[m1_c] <=> m1_N-carbamoyl-L-aspartate[m1_c]'	0	0	0	NaN	NaN	'm1_Pyrimidine metabolism'	'm1_Cad(lgFC:0.08336FDR:1)'
'm1_HMR_4575'	'm1_(S)-dihydroorotate[m1_c] + m1_ubiquinone[m1_m] <=> m1_orotate[m1_c] + m1_ubiquinol[m1_m]'	0	0	0	NaN	NaN	'm1_Transport, mitochondrial'	'm1_Dhodh(lgFC:-0.19231FDR:0.8342)'
'm1_HMR_4637'	'm1_ADP[m1_c] + m1_dTDP[m1_c] <=> m1_ATP[m1_c] + m1_dTMP[m1_c]'	0	-0.00321366	0.00321366	NaN	NaN	'm1_Pyrimidine metabolism'	'm1_Dtymk(lgFC:-0.13167FDR:0.83651)'
'm1_HMR_4642'	'm1_dUMP[m1_c] + m1_H2O[m1_c] => m1_deoxyuridine[m1_c] + m1_Pi[m1_c]'	0	0	0	NaN	NaN	'm1_Pyrimidine metabolism'	'm1_Nt5c(lgFC:-0.24491FDR:0.7274) or m1_Nt5m(lgFC:-0.059078FDR:1)'
'm1_HMR_4643'	'm1_dUTP[m1_m] + m1_H2O[m1_m] => m1_dUMP[m1_m] + m1_PPi[m1_m]'	0	0	0	NaN	NaN	'm1_Pyrimidine metabolism'	'm1_Dut(lgFC:-0.43255FDR:0.47235) or m1_Itpa(lgFC:0.31896FDR:0.28205)'
'm1_HMR_4644'	'm1_5,10-methylene-THF[m1_c] + m1_dUMP[m1_c] <=> m1_dihydrofolate[m1_c] + m1_dTMP[m1_c]'	0	0	0	NaN	NaN	'm1_Pyrimidine metabolism'	'm1_Tyms(lgFC:0.16692FDR:0.96781)'
'm1_HMR_4672'	'm1_dCTP[m1_c] + m1_H2O[m1_c] => m1_dUTP[m1_c] + m1_NH3[m1_c]'	0	0	0	NaN	NaN	'm1_Pyrimidine metabolism'	''
'm1_HMR_4676'	'm1_cytidine[m1_c] + m1_dUTP[m1_c] => m1_CMP[m1_c] + m1_dUDP[m1_c]'	0	0	0	NaN	NaN	'm1_Pyrimidine metabolism'	'm1_Uck1(lgFC:0.22281FDR:0.87549) or m1_Uck2(lgFC:-0.19846FDR:0.91841) or m1_Uckl1(lgFC:0.01002FDR:1)'
'm1_HMR_4736'	'm1_dihydrothymine[m1_c] + m1_H2O[m1_c] => m1_3-ureidoisobutyrate[m1_c]'	0	0	0	NaN	NaN	'm1_Pyrimidine metabolism'	'm1_Dpys(lgFC:0.05777FDR:1)'
'm1_HMR_4819'	'm1_3-ureidoisobutyrate[m1_c] + m1_H2O[m1_c] => m1_CO2[m1_c] + m1_D-3-amino-isobutanoate[m1_c] + m1_NH3[m1_c]'	0	0	0	NaN	NaN	'm1_Pyrimidine metabolism'	'm1_Upb1(lgFC:-0.034428FDR:1)'
'm1_HMR_5299'	'm1_ATP[m1_c] + m1_uridine[m1_c] => m1_ADP[m1_c] + m1_UMP[m1_c]'	0	0	0	NaN	NaN	'm1_Pyrimidine metabolism'	'm1_Uck1(lgFC:0.22281FDR:0.87549) or m1_Uck2(lgFC:-0.19846FDR:0.91841) or m1_Uckl1(lgFC:0.01002FDR:1)'
'm1_HMR_5352'	'm1_dUTP[m1_c] + m1_uridine[m1_c] => m1_dUDP[m1_c] + m1_UMP[m1_c]'	0	0	0	NaN	NaN	'm1_Pyrimidine metabolism'	'm1_Uck1(lgFC:0.22281FDR:0.87549) or m1_Uck2(lgFC:-0.19846FDR:0.91841) or m1_Uckl1(lgFC:0.01002FDR:1)'
'm1_HMR_5415'	'm1_ADP[m1_m] + m1_mitothioredoxin[m1_m] => m1_dADP[m1_m] + m1_H2O[m1_m] + m1_mitooxidized thioredoxin[m1_m]'	0	0	0	NaN	NaN	'm1_Pyrimidine metabolism'	'm1_Rrm1(lgFC:-0.22412FDR:0.74699) or m1_Rrm2(lgFC:0.32191FDR:0.88747) or m1_Rrm2b(lgFC:-0.10506FDR:0.97019) or m1_Txn1(lgFC:-0.29546FDR:0.26076)'
'm1_HMR_5417'	'm1_H+[m1_m] + m1_mitooxidized thioredoxin[m1_m] + m1_NADPH[m1_m] => m1_mitothioredoxin[m1_m] + m1_NADP+[m1_m]'	0	0	0	NaN	NaN	'm1_Pyrimidine metabolism'	'm1_Txnrd1(lgFC:-0.075994FDR:0.97204) or m1_Txnrd2(lgFC:-0.037219FDR:1) or m1_Txnrd3(lgFC:-0.13103FDR:0.92145)'
'm1_HMR_6612'	'm1_dADP[m1_m] + m1_dTDP[m1_m] <=> m1_dATP[m1_m] + m1_dTMP[m1_m]'	0	0.00321366	0.00321366	NaN	NaN	'm1_Pyrimidine metabolism'	'm1_Dtymk(lgFC:-0.13167FDR:0.83651)'
'm1_HMR_6621'	'm1_thioredoxin[m1_m] + m1_UTP[m1_m] => m1_dUTP[m1_m] + m1_H2O[m1_m] + m1_oxidized thioredoxin[m1_m]'	0	0	0	NaN	NaN	'm1_Pyrimidine metabolism'	'm1_Rrm1(lgFC:-0.22412FDR:0.74699) or m1_Rrm2(lgFC:0.32191FDR:0.88747) or m1_Rrm2b(lgFC:-0.10506FDR:0.97019) or m1_Txn1(lgFC:-0.29546FDR:0.26076)'
'm1_HMR_6622'	'm1_thioredoxin[m1_n] + m1_UTP[m1_n] => m1_dUTP[m1_n] + m1_H2O[m1_n] + m1_oxidized thioredoxin[m1_n]'	0	0	0	NaN	NaN	'm1_Pyrimidine metabolism'	'm1_Rrm1(lgFC:-0.22412FDR:0.74699) or m1_Rrm2(lgFC:0.32191FDR:0.88747) or m1_Rrm2b(lgFC:-0.10506FDR:0.97019) or m1_Txn1(lgFC:-0.29546FDR:0.26076)'
'm1_HMR_6623'	'm1_deoxyuridine[m1_c] + m1_dGTP[m1_c] => m1_dGDP[m1_c] + m1_dUMP[m1_c]'	0	0	0	NaN	NaN	'm1_Pyrimidine metabolism'	'm1_Tk1(lgFC:-0.78943FDR:0.69349)'
'm1_HMR_6624'	'm1_deoxyuridine[m1_m] + m1_dGTP[m1_m] => m1_dGDP[m1_m] + m1_dUMP[m1_m]'	0	0	0	NaN	NaN	'm1_Pyrimidine metabolism'	'm1_Tk2(lgFC:0.1823FDR:0.99096)'
'm1_HMR_7744'	'm1_H2O[m1_c] + m1_pseudouridine-5-phosphate[m1_c] <=> m1_ribose-5-phosphate[m1_c] + m1_uracil[m1_c]'	0	0	0	NaN	NaN	'm1_Pyrimidine metabolism'	''
'm1_HMR_8072'	'm1_2-deoxy-D-ribose-1-phosphate[m1_c] + m1_H2O[m1_c] => m1_deoxyribose[m1_c] + m1_Pi[m1_c]'	0	0	0	NaN	NaN	'm1_Pyrimidine metabolism'	''
'm1_HMR_8637'	'm1_cytosine[m1_c] + m1_H2O[m1_c] => m1_NH3[m1_c] + m1_uracil[m1_c]'	0	0	0	NaN	NaN	'm1_Pyrimidine metabolism'	''
'm1_HMR_3965'	'm1_dUDP[m1_c] + m1_H2O[m1_c] => m1_dUMP[m1_c] + m1_Pi[m1_c]'	0	0	0	NaN	NaN	'm1_Nucleotide metabolism'	'm1_Dut(lgFC:-0.43255FDR:0.47235)'
'm1_HMR_3966'	'm1_ATP[m1_m] + m1_H2O[m1_m] => m1_AMP[m1_m] + m1_PPi[m1_m]'	0	0	0	NaN	NaN	'm1_Nucleotide metabolism'	'm1_Itpa(lgFC:0.31896FDR:0.28205)'
'm1_HMR_3967'	'm1_CDP[m1_c] + m1_GDP[m1_c] <=> m1_CMP[m1_c] + m1_GTP[m1_c]'	0	-16.6484	16.6484	NaN	NaN	'm1_Nucleotide metabolism'	'm1_Cmpk1(lgFC:0.22743FDR:0.58323)'
'm1_HMR_3968'	'm1_ADP[m1_c] + m1_dUDP[m1_c] <=> m1_ATP[m1_c] + m1_dUMP[m1_c]'	0	0	0	NaN	NaN	'm1_Nucleotide metabolism'	'm1_Dtymk(lgFC:-0.13167FDR:0.83651)'
'm1_HMR_3999'	'm1_ADP[m1_s] + m1_H2O[m1_s] => m1_AMP[m1_s] + m1_Pi[m1_s]'	0	0	0	NaN	NaN	'm1_Nucleotide metabolism'	'm1_Entpd1(lgFC:-0.65711FDR:0.33817) or m1_Entpd8(lgFC:-0.18924FDR:1)'
'm1_HMR_4024'	'm1_ADP[m1_c] + m1_CDP[m1_c] <=> m1_ATP[m1_c] + m1_CMP[m1_c]'	-0.0169833	-0.0181918	0.0351751	NaN	-0.0181918	'm1_Nucleotide metabolism'	'm1_Cmpk1(lgFC:0.22743FDR:0.58323)'
'm1_HMR_4026'	'm1_ADP[m1_m] + m1_CDP[m1_m] <=> m1_ATP[m1_m] + m1_CMP[m1_m]'	0	0	0	NaN	NaN	'm1_Nucleotide metabolism'	'm1_Cmpk2(lgFC:0.23193FDR:0.94928)'
'm1_HMR_4054'	'm1_ATP[m1_c] + m1_thymidine[m1_c] => m1_ADP[m1_c] + m1_dTMP[m1_c]'	0	0	0	NaN	NaN	'm1_Nucleotide metabolism'	'm1_Tk1(lgFC:-0.78943FDR:0.69349)'
'm1_HMR_4061'	'm1_H2O[m1_s] + m1_UTP[m1_s] => m1_Pi[m1_s] + m1_UDP[m1_s]'	0	0	0	NaN	NaN	'm1_Nucleotide metabolism'	'm1_Entpd1(lgFC:-0.65711FDR:0.33817) or m1_Entpd8(lgFC:-0.18924FDR:1)'
'm1_HMR_4083'	'm1_adenosine[m1_m] + m1_ATP[m1_m] => m1_ADP[m1_m] + m1_AMP[m1_m]'	0	0.00321366	0.00321366	NaN	NaN	'm1_Nucleotide metabolism'	''
'm1_HMR_4136'	'm1_GTP[m1_s] + m1_H2O[m1_s] => m1_GDP[m1_s] + m1_Pi[m1_s]'	0	0	0	NaN	NaN	'm1_Nucleotide metabolism'	'm1_Cant1(lgFC:0.00054726FDR:1) or m1_Dnm1(lgFC:-0.39598FDR:1) or m1_Dnm3(lgFC:-0.55033FDR:0.84751) or m1_Eef1a1(lgFC:0.029223FDR:1) or m1_Eef1a2(lgFC:1.1458FDR:0.88496) or m1_Eef2(lgFC:-0.086727FDR:0.9391) or m1_Entpd1(lgFC:-0.65711FDR:0.33817) or m1_Entpd2(lgFC:-0.53541FDR:0.56275) or m1_Entpd4(lgFC:-0.065582FDR:1) or m1_Entpd5(lgFC:0.037161FDR:1) or m1_Entpd6(lgFC:-0.091637FDR:0.9879) or m1_En…
'm1_HMR_4180'	'm1_ATP[m1_c] + m1_cytidine[m1_c] => m1_ADP[m1_c] + m1_CMP[m1_c]'	0	0	0	NaN	NaN	'm1_Nucleotide metabolism'	'm1_Uck1(lgFC:0.22281FDR:0.87549) or m1_Uck2(lgFC:-0.19846FDR:0.91841) or m1_Uckl1(lgFC:0.01002FDR:1)'
'm1_HMR_4185'	'm1_ATP[m1_c] + m1_sulfate[m1_c] => m1_adenylyl sulfate[m1_c] + m1_PPi[m1_c]'	0	0	0	NaN	NaN	'm1_Nucleotide metabolism'	'm1_Papss1(lgFC:-0.17739FDR:0.94969) or m1_Papss2(lgFC:-0.73477FDR:0.25723)'
'm1_HMR_4186'	'm1_adenylyl sulfate[m1_c] + m1_ATP[m1_c] => m1_ADP[m1_c] + m1_PAPS[m1_c]'	0	0	0	NaN	NaN	'm1_Nucleotide metabolism'	'm1_Papss1(lgFC:-0.17739FDR:0.94969) or m1_Papss2(lgFC:-0.73477FDR:0.25723)'
'm1_HMR_4342'	'm1_H2O[m1_s] + m1_IDP[m1_s] => m1_IMP[m1_s] + m1_Pi[m1_s]'	0	0	0	NaN	NaN	'm1_Nucleotide metabolism'	'm1_Cant1(lgFC:0.00054726FDR:1) or m1_Entpd1(lgFC:-0.65711FDR:0.33817) or m1_Entpd2(lgFC:-0.53541FDR:0.56275) or m1_Entpd4(lgFC:-0.065582FDR:1) or m1_Entpd5(lgFC:0.037161FDR:1) or m1_Entpd6(lgFC:-0.091637FDR:0.9879) or m1_Entpd8(lgFC:-0.18924FDR:1)'
'm1_HMR_4483'	'm1_ATP[m1_m] + m1_thymidine[m1_m] => m1_ADP[m1_m] + m1_dTMP[m1_m]'	0	0	0	NaN	NaN	'm1_Nucleotide metabolism'	'm1_Tk2(lgFC:0.1823FDR:0.99096)'
'm1_HMR_4507'	'm1_dCMP[m1_c] + m1_H2O[m1_c] => m1_dUMP[m1_c] + m1_NH3[m1_c]'	0	0	0	NaN	NaN	'm1_Nucleotide metabolism'	''
'm1_HMR_4516'	'm1_dCDP[m1_c] + m1_H2O[m1_c] => m1_dCMP[m1_c] + m1_Pi[m1_c]'	0	0	0	NaN	NaN	'm1_Nucleotide metabolism'	''
'm1_HMR_4601'	'm1_ATP[m1_m] + m1_deoxyguanosine[m1_m] => m1_ADP[m1_m] + m1_dGMP[m1_m]'	0	0	0	NaN	NaN	'm1_Nucleotide metabolism'	'm1_Dguok(lgFC:-0.0081051FDR:1)'
'm1_HMR_4633'	'm1_ATP[m1_c] + m1_deoxyadenosine[m1_c] => m1_ADP[m1_c] + m1_dAMP[m1_c]'	0	0	0	NaN	NaN	'm1_Nucleotide metabolism'	'm1_Ada(lgFC:-0.55239FDR:0.8001)'
'm1_HMR_4640'	'm1_ATP[m1_m] + m1_dUMP[m1_m] => m1_ADP[m1_m] + m1_dUDP[m1_m]'	0	0	0	NaN	NaN	'm1_Nucleotide metabolism'	'm1_Dtymk(lgFC:-0.13167FDR:0.83651)'
'm1_HMR_4641'	'm1_ATP[m1_c] + m1_deoxyuridine[m1_c] => m1_ADP[m1_c] + m1_dUMP[m1_c]'	0	0	0	NaN	NaN	'm1_Nucleotide metabolism'	'm1_Tk1(lgFC:-0.78943FDR:0.69349)'
'm1_HMR_4680'	'm1_2-deoxy-D-ribose-1-phosphate[m1_c] + m1_uracil[m1_c] <=> m1_deoxyuridine[m1_c] + m1_Pi[m1_c]'	0	0	0	NaN	NaN	'm1_Nucleotide metabolism'	'm1_Upp1(lgFC:-0.47978FDR:0.91605) or m1_Upp2(lgFC:-0.88859FDR:0.91221)'
'm1_HMR_4806'	'm1_10-formyl-THF[m1_c] + m1_GAR[m1_c] => m1_N-formyl-GAR[m1_c] + m1_THF[m1_c]'	0	0	0	NaN	0	'm1_Nucleotide metabolism'	'm1_Gart(lgFC:-0.51812FDR:0.44374)'
'm1_HMR_5394'	'm1_guanosine[m1_c] + m1_H2O[m1_c] => m1_NH3[m1_c] + m1_xanthosine[m1_c]'	0	0	0	NaN	NaN	'm1_Nucleotide metabolism'	''
'm1_HMR_6625'	'm1_ATP[m1_m] + m1_deoxyuridine[m1_m] => m1_ADP[m1_m] + m1_dUMP[m1_m]'	0	0	0	NaN	NaN	'm1_Nucleotide metabolism'	'm1_Tk2(lgFC:0.1823FDR:0.99096)'
'm1_HMR_6626'	'm1_dUMP[m1_m] + m1_H2O[m1_m] => m1_deoxyuridine[m1_m] + m1_Pi[m1_m]'	0	0	0	NaN	NaN	'm1_Nucleotide metabolism'	'm1_Nt5c(lgFC:-0.24491FDR:0.7274) or m1_Nt5m(lgFC:-0.059078FDR:1)'
'm1_HMR_7160'	'0.3 m1_dATP[m1_c] + 0.2 m1_dCTP[m1_c] + 0.2 m1_dGTP[m1_c] + 0.3 m1_dTTP[m1_c] => m1_DNA[m1_c] + m1_PPi[m1_c]'	0	0	0	NaN	NaN	'm1_Nucleotide metabolism'	'm1_Mybbp1a(lgFC:0.011279FDR:1) or m1_Pola1(lgFC:-0.46357FDR:0.62036) or m1_Pola2(lgFC:-0.37439FDR:0.72055) or m1_Polb(lgFC:-0.11864FDR:0.95524) or m1_Pold2(lgFC:-0.12749FDR:0.93923) or m1_Pold3(lgFC:-0.37552FDR:0.43635) or m1_Pole2(lgFC:-0.70477FDR:0.87842) or m1_Poli(lgFC:-0.60031FDR:0.55541)'
'm1_HMR_7161'	'0.18 m1_ATP[m1_c] + 0.3 m1_CTP[m1_c] + 0.34 m1_GTP[m1_c] + 0.18 m1_UTP[m1_c] => m1_PPi[m1_c] + m1_RNA[m1_c]'	0	0	0	NaN	NaN	'm1_Nucleotide metabolism'	'm1_Mtpap(lgFC:0.16672FDR:0.95003) or m1_Papolg(lgFC:-0.0045192FDR:1) or m1_Polr1a(lgFC:0.47569FDR:0.54162) or m1_Polr1c(lgFC:-0.25905FDR:0.44374) or m1_Polr1d(lgFC:-0.15857FDR:0.56826) or m1_Polr1e(lgFC:0.287FDR:0.79368) or m1_Polr2a(lgFC:-0.015098FDR:1) or m1_Polr2b(lgFC:-0.09368FDR:0.71887) or m1_Polr2e(lgFC:-0.16052FDR:0.73042) or m1_Polr2g(lgFC:-0.13654FDR:0.90055) or m1_Polr2h(lgFC:-0.23597…
'm1_HMR_7162'	'0.18 m1_ADP[m1_c] + 0.3 m1_CDP[m1_c] + 0.34 m1_GDP[m1_c] + 0.18 m1_UDP[m1_c] => m1_Pi[m1_c] + m1_RNA[m1_c]'	0	0	0	NaN	NaN	'm1_Nucleotide metabolism'	'm1_Pnpt1(lgFC:-0.189FDR:0.73902)'
'm1_HMR_7163'	'm1_DNA[m1_c] + m1_H2O[m1_c] => 0.3 m1_dAMP[m1_c] + 0.2 m1_dCMP[m1_c] + 0.2 m1_dGMP[m1_c] + 0.3 m1_dTMP[m1_c]'	0	0	0	NaN	0	'm1_Nucleotide metabolism'	'm1_Rad1(lgFC:-0.62584FDR:0.39371)'
'm1_HMR_7164'	'm1_H2O[m1_c] + m1_RNA[m1_c] => 0.18 m1_AMP[m1_c] + 0.3 m1_CMP[m1_c] + 0.34 m1_GMP[m1_c] + 0.18 m1_UMP[m1_c]'	0	0	0	NaN	0	'm1_Nucleotide metabolism'	'm1_Rad1(lgFC:-0.62584FDR:0.39371)'
'm1_HMR_7713'	'm1_AMP[m1_l] + m1_H2O[m1_l] => m1_adenosine[m1_l] + m1_Pi[m1_l]'	1	0	1	NaN	1.36122	'm1_Nucleotide metabolism'	'm1_Nt5e(lgFC:0.66281FDR:0.38059)'
'm1_HMR_7716'	'm1_H2O[m1_l] + m1_UMP[m1_l] => m1_Pi[m1_l] + m1_uridine[m1_l]'	1	0	1	NaN	1.36122	'm1_Nucleotide metabolism'	'm1_Nt5e(lgFC:0.66281FDR:0.38059)'
'm1_HMR_7717'	'm1_H2O[m1_m] + m1_UMP[m1_m] => m1_Pi[m1_m] + m1_uridine[m1_m]'	0	0	0	NaN	NaN	'm1_Nucleotide metabolism'	'm1_Nt5m(lgFC:-0.059078FDR:1)'
'm1_HMR_7721'	'm1_CMP[m1_l] + m1_H2O[m1_l] => m1_cytidine[m1_l] + m1_Pi[m1_l]'	1	0	1	NaN	1.36122	'm1_Nucleotide metabolism'	'm1_Nt5e(lgFC:0.66281FDR:0.38059)'
'm1_HMR_7725'	'm1_dTMP[m1_l] + m1_H2O[m1_l] => m1_Pi[m1_l] + m1_thymidine[m1_l]'	0	0	0	NaN	NaN	'm1_Nucleotide metabolism'	'm1_Nt5c(lgFC:-0.24491FDR:0.7274)'
'm1_HMR_7728'	'm1_GMP[m1_l] + m1_H2O[m1_l] => m1_guanosine[m1_l] + m1_Pi[m1_l]'	1	0	1	NaN	1.36122	'm1_Nucleotide metabolism'	'm1_Nt5e(lgFC:0.66281FDR:0.38059)'
'm1_HMR_7800'	'm1_ADP[m1_c] + m1_GDP[m1_c] <=> m1_AMP[m1_c] + m1_GTP[m1_c]'	-0.18293	0	0.18293	NaN	NaN	'm1_Nucleotide metabolism'	''
'm1_HMR_7801'	'm1_ADP[m1_m] + m1_GDP[m1_m] <=> m1_AMP[m1_m] + m1_GTP[m1_m]'	0	0.0263584	0.0263584	1.00822	NaN	'm1_Nucleotide metabolism'	'm1_Ak3(lgFC:0.11458FDR:0.90055)'
'm1_HMR_7802'	'2 m1_dADP[m1_c] <=> m1_dAMP[m1_c] + m1_dATP[m1_c]'	0	0	0	NaN	NaN	'm1_Nucleotide metabolism'	''
'm1_HMR_9850'	'm1_H2O[m1_n] + m1_UppppU[m1_n] => m1_UMP[m1_n] + m1_UTP[m1_n]'	0	0	0	NaN	NaN	'm1_Nucleotide metabolism'	'm1_Nudt2(lgFC:-0.14027FDR:0.85065)'
'm1_HMR_7863'	'm1_CDP[m1_c] + m1_UDP[m1_c] <=> m1_CTP[m1_c] + m1_UMP[m1_c]'	0	0	0	NaN	NaN	'm1_Nucleotide metabolism'	'm1_Cmpk1(lgFC:0.22743FDR:0.58323)'
'm1_HMR_7864'	'm1_CDP[m1_n] + m1_UDP[m1_n] <=> m1_CTP[m1_n] + m1_UMP[m1_n]'	0	0	0	NaN	NaN	'm1_Nucleotide metabolism'	'm1_Cmpk1(lgFC:0.22743FDR:0.58323)'
'm1_HMR_7865'	'2 m1_UDP[m1_c] <=> m1_UMP[m1_c] + m1_UTP[m1_c]'	0	0.67358	0.67358	NaN	-0.0127001	'm1_Nucleotide metabolism'	'm1_Cmpk1(lgFC:0.22743FDR:0.58323)'
'm1_HMR_7866'	'2 m1_UDP[m1_n] <=> m1_UMP[m1_n] + m1_UTP[m1_n]'	0	0	0	NaN	NaN	'm1_Nucleotide metabolism'	'm1_Cmpk1(lgFC:0.22743FDR:0.58323)'
'm1_HMR_7867'	'm1_GDP[m1_c] + m1_UDP[m1_c] <=> m1_GTP[m1_c] + m1_UMP[m1_c]'	-0.0118564	-0.0127001	0.0245564	NaN	NaN	'm1_Nucleotide metabolism'	'm1_Cmpk1(lgFC:0.22743FDR:0.58323)'
'm1_HMR_7868'	'm1_GDP[m1_n] + m1_UDP[m1_n] <=> m1_GTP[m1_n] + m1_UMP[m1_n]'	0	0	0	NaN	NaN	'm1_Nucleotide metabolism'	'm1_Cmpk1(lgFC:0.22743FDR:0.58323)'
'm1_HMR_7869'	'm1_dADP[m1_c] + m1_UDP[m1_c] <=> m1_dATP[m1_c] + m1_UMP[m1_c]'	0	16.0098	16.0098	NaN	NaN	'm1_Nucleotide metabolism'	'm1_Cmpk1(lgFC:0.22743FDR:0.58323)'
'm1_HMR_7870'	'm1_dADP[m1_n] + m1_UDP[m1_n] <=> m1_dATP[m1_n] + m1_UMP[m1_n]'	0	0	0	NaN	NaN	'm1_Nucleotide metabolism'	'm1_Cmpk1(lgFC:0.22743FDR:0.58323)'
'm1_HMR_7871'	'm1_dCDP[m1_c] + m1_UDP[m1_c] <=> m1_dCTP[m1_c] + m1_UMP[m1_c]'	0	0	0	NaN	NaN	'm1_Nucleotide metabolism'	'm1_Cmpk1(lgFC:0.22743FDR:0.58323)'
'm1_HMR_7872'	'm1_dCDP[m1_n] + m1_UDP[m1_n] <=> m1_dCTP[m1_n] + m1_UMP[m1_n]'	0	0	0	NaN	NaN	'm1_Nucleotide metabolism'	'm1_Cmpk1(lgFC:0.22743FDR:0.58323)'
'm1_HMR_7873'	'm1_dGDP[m1_c] + m1_UDP[m1_c] <=> m1_dGTP[m1_c] + m1_UMP[m1_c]'	0	-16.6738	16.6738	NaN	NaN	'm1_Nucleotide metabolism'	'm1_Cmpk1(lgFC:0.22743FDR:0.58323)'
'm1_HMR_7874'	'm1_dGDP[m1_n] + m1_UDP[m1_n] <=> m1_dGTP[m1_n] + m1_UMP[m1_n]'	0	0	0	NaN	NaN	'm1_Nucleotide metabolism'	'm1_Cmpk1(lgFC:0.22743FDR:0.58323)'
'm1_HMR_7875'	'm1_ADP[m1_m] + m1_UDP[m1_m] <=> m1_ATP[m1_m] + m1_UMP[m1_m]'	0	0	0	NaN	NaN	'm1_Nucleotide metabolism'	'm1_Cmpk2(lgFC:0.23193FDR:0.94928)'
'm1_HMR_7876'	'm1_ADP[m1_n] + m1_UDP[m1_n] <=> m1_ATP[m1_n] + m1_UMP[m1_n]'	0	0	0	NaN	NaN	'm1_Nucleotide metabolism'	'm1_Cmpk1(lgFC:0.22743FDR:0.58323)'
'm1_HMR_7878'	'm1_ADP[m1_c] + m1_dITP[m1_c] <=> m1_ATP[m1_c] + m1_dIDP[m1_c]'	0	17.7129	17.7129	NaN	NaN	'm1_Nucleotide metabolism'	'm1_Nme1(lgFC:-0.097998FDR:0.93886) or m1_Nme2(lgFC:0.036844FDR:1) or m1_Nme3(lgFC:-0.55194FDR:0.39641) or m1_Nme4(lgFC:-0.093277FDR:1) or m1_Nme6(lgFC:-0.30301FDR:0.7942) or m1_Nme7(lgFC:-0.095366FDR:0.99256)'
'm1_HMR_7879'	'm1_dITP[m1_c] + m1_H+[m1_c] + m1_H2O[m1_c] => m1_dIMP[m1_c] + m1_PPi[m1_c]'	0	0	0	NaN	NaN	'm1_Nucleotide metabolism'	'm1_Itpa(lgFC:0.31896FDR:0.28205)'
'm1_HMR_7880'	'm1_dIMP[m1_c] + m1_H2O[m1_c] => m1_deoxyinosine[m1_c] + m1_H+[m1_c] + m1_Pi[m1_c]'	0	0	0	NaN	NaN	'm1_Nucleotide metabolism'	'm1_Nt5c(lgFC:-0.24491FDR:0.7274)'
'm1_HMR_7881'	'm1_ADP[m1_n] + m1_dITP[m1_n] <=> m1_ATP[m1_n] + m1_dIDP[m1_n]'	0	-17.7129	17.7129	NaN	NaN	'm1_Nucleotide metabolism'	'm1_Nme1(lgFC:-0.097998FDR:0.93886) or m1_Nme2(lgFC:0.036844FDR:1)'
'm1_HMR_7882'	'm1_ADP[m1_n] + m1_GTP[m1_n] <=> m1_ATP[m1_n] + m1_GDP[m1_n]'	0	0	0	NaN	NaN	'm1_Nucleotide metabolism'	'm1_Nme1(lgFC:-0.097998FDR:0.93886) or m1_Nme2(lgFC:0.036844FDR:1)'
'm1_HMR_7883'	'm1_ADP[m1_m] + m1_UTP[m1_m] <=> m1_ATP[m1_m] + m1_UDP[m1_m]'	0	0	0	NaN	NaN	'm1_Nucleotide metabolism'	'm1_Nme4(lgFC:-0.093277FDR:1)'
'm1_HMR_7884'	'm1_ADP[m1_n] + m1_UTP[m1_n] <=> m1_ATP[m1_n] + m1_UDP[m1_n]'	0	0	0	NaN	NaN	'm1_Nucleotide metabolism'	'm1_Nme1(lgFC:-0.097998FDR:0.93886) or m1_Nme2(lgFC:0.036844FDR:1)'
'm1_HMR_7885'	'm1_ADP[m1_n] + m1_CTP[m1_n] <=> m1_ATP[m1_n] + m1_CDP[m1_n]'	0	0	0	NaN	NaN	'm1_Nucleotide metabolism'	'm1_Nme1(lgFC:-0.097998FDR:0.93886) or m1_Nme2(lgFC:0.036844FDR:1)'
'm1_HMR_7886'	'm1_ADP[m1_m] + m1_dTTP[m1_m] <=> m1_ATP[m1_m] + m1_dTDP[m1_m]'	0	0	0	NaN	NaN	'm1_Nucleotide metabolism'	'm1_Nme4(lgFC:-0.093277FDR:1)'
'm1_HMR_7887'	'm1_ADP[m1_n] + m1_dTTP[m1_n] <=> m1_ATP[m1_n] + m1_dTDP[m1_n]'	0	17.7129	17.7129	NaN	NaN	'm1_Nucleotide metabolism'	'm1_Nme1(lgFC:-0.097998FDR:0.93886) or m1_Nme2(lgFC:0.036844FDR:1)'
'm1_HMR_7888'	'm1_ADP[m1_n] + m1_dGTP[m1_n] <=> m1_ATP[m1_n] + m1_dGDP[m1_n]'	0	0	0	NaN	NaN	'm1_Nucleotide metabolism'	'm1_Nme1(lgFC:-0.097998FDR:0.93886) or m1_Nme2(lgFC:0.036844FDR:1)'
'm1_HMR_7889'	'm1_ADP[m1_n] + m1_dUTP[m1_n] <=> m1_ATP[m1_n] + m1_dUDP[m1_n]'	0	0	0	NaN	NaN	'm1_Nucleotide metabolism'	'm1_Nme1(lgFC:-0.097998FDR:0.93886) or m1_Nme2(lgFC:0.036844FDR:1)'
'm1_HMR_7890'	'm1_ADP[m1_m] + m1_dCTP[m1_m] <=> m1_ATP[m1_m] + m1_dCDP[m1_m]'	0	0	0	NaN	NaN	'm1_Nucleotide metabolism'	'm1_Nme4(lgFC:-0.093277FDR:1)'
'm1_HMR_7891'	'm1_ADP[m1_n] + m1_dCTP[m1_n] <=> m1_ATP[m1_n] + m1_dCDP[m1_n]'	0	0	0	NaN	NaN	'm1_Nucleotide metabolism'	'm1_Nme1(lgFC:-0.097998FDR:0.93886) or m1_Nme2(lgFC:0.036844FDR:1)'
'm1_HMR_7892'	'm1_ADP[m1_n] + m1_dATP[m1_n] <=> m1_ATP[m1_n] + m1_dADP[m1_n]'	0	0	0	NaN	NaN	'm1_Nucleotide metabolism'	'm1_Nme1(lgFC:-0.097998FDR:0.93886) or m1_Nme2(lgFC:0.036844FDR:1)'
'm1_HMR_7893'	'm1_ADP[m1_n] + m1_ITP[m1_n] <=> m1_ATP[m1_n] + m1_IDP[m1_n]'	0	0	0	NaN	NaN	'm1_Nucleotide metabolism'	'm1_Nme1(lgFC:-0.097998FDR:0.93886) or m1_Nme2(lgFC:0.036844FDR:1)'
'm1_HMR_8083'	'm1_cGMP[m1_n] + m1_H2O[m1_n] => m1_GMP[m1_n]'	0	0	0	NaN	NaN	'm1_Nucleotide metabolism'	'm1_Il18bp(lgFC:-0.18634FDR:0.80433) or m1_Pde10a(lgFC:0.78062FDR:0.99256) or m1_Pde11a(lgFC:0.56874FDR:0.99146) or m1_Pde1a(lgFC:0.11798FDR:1) or m1_Pde1b(lgFC:0.058016FDR:1) or m1_Pde1c(lgFC:-0.70656FDR:0.86538) or m1_Pde2a(lgFC:-0.28354FDR:1) or m1_Pde3a(lgFC:0.22374FDR:0.93252) or m1_Pde3b(lgFC:0.19386FDR:0.93546) or m1_Pde4a(lgFC:-0.61109FDR:0.64269) or m1_Pde4b(lgFC:-0.4381FDR:0.82017) or m…
'm1_HMR_8085'	'm1_cGMP[m1_g] + m1_H2O[m1_g] => m1_GMP[m1_g]'	0	0	0	NaN	NaN	'm1_Nucleotide metabolism'	'm1_Il18bp(lgFC:-0.18634FDR:0.80433) or m1_Pde10a(lgFC:0.78062FDR:0.99256) or m1_Pde11a(lgFC:0.56874FDR:0.99146) or m1_Pde1a(lgFC:0.11798FDR:1) or m1_Pde1b(lgFC:0.058016FDR:1) or m1_Pde1c(lgFC:-0.70656FDR:0.86538) or m1_Pde2a(lgFC:-0.28354FDR:1) or m1_Pde3a(lgFC:0.22374FDR:0.93252) or m1_Pde3b(lgFC:0.19386FDR:0.93546) or m1_Pde4a(lgFC:-0.61109FDR:0.64269) or m1_Pde4b(lgFC:-0.4381FDR:0.82017) or m…
'm1_HMR_8087'	'm1_cAMP[m1_g] + m1_H2O[m1_g] => m1_AMP[m1_g]'	0	0	0	NaN	NaN	'm1_Nucleotide metabolism'	'm1_Il18bp(lgFC:-0.18634FDR:0.80433) or m1_Pde10a(lgFC:0.78062FDR:0.99256) or m1_Pde11a(lgFC:0.56874FDR:0.99146) or m1_Pde1a(lgFC:0.11798FDR:1) or m1_Pde1b(lgFC:0.058016FDR:1) or m1_Pde1c(lgFC:-0.70656FDR:0.86538) or m1_Pde2a(lgFC:-0.28354FDR:1) or m1_Pde3a(lgFC:0.22374FDR:0.93252) or m1_Pde3b(lgFC:0.19386FDR:0.93546) or m1_Pde4a(lgFC:-0.61109FDR:0.64269) or m1_Pde4b(lgFC:-0.4381FDR:0.82017) or m…
'm1_HMR_8443'	'm1_ADP-glucose[m1_c] + m1_H2O[m1_c] => m1_AMP[m1_c] + m1_glucose-1-phosphate[m1_c]'	0	0	0	NaN	NaN	'm1_Nucleotide metabolism'	'm1_Nudt5(lgFC:0.19454FDR:0.76893)'
'm1_HMR_8444'	'm1_ADP-mannose[m1_c] + m1_H2O[m1_c] => m1_AMP[m1_c] + m1_mannose-1-phosphate[m1_c]'	0	0	0	NaN	NaN	'm1_Nucleotide metabolism'	'm1_Nudt5(lgFC:0.19454FDR:0.76893)'
'm1_HMR_8446'	'm1_cytidine[m1_n] + m1_H2O[m1_n] => m1_NH3[m1_n] + m1_uridine[m1_n]'	0	0	0	NaN	NaN	'm1_Nucleotide metabolism'	''
'm1_HMR_8448'	'm1_CDP[m1_c] + m1_dGDP[m1_c] <=> m1_CMP[m1_c] + m1_dGTP[m1_c]'	0	16.6738	16.6738	NaN	NaN	'm1_Nucleotide metabolism'	'm1_Cmpk1(lgFC:0.22743FDR:0.58323)'
'm1_HMR_8449'	'm1_CDP[m1_n] + m1_dGDP[m1_n] <=> m1_CMP[m1_n] + m1_dGTP[m1_n]'	0	0	0	NaN	NaN	'm1_Nucleotide metabolism'	'm1_Cmpk1(lgFC:0.22743FDR:0.58323)'
'm1_HMR_8450'	'm1_dCDP[m1_c] + m1_dGDP[m1_c] <=> m1_dCMP[m1_c] + m1_dGTP[m1_c]'	0	0	0	NaN	NaN	'm1_Nucleotide metabolism'	'm1_Cmpk1(lgFC:0.22743FDR:0.58323)'
'm1_HMR_8451'	'm1_dCDP[m1_n] + m1_dGDP[m1_n] <=> m1_dCMP[m1_n] + m1_dGTP[m1_n]'	0	0	0	NaN	NaN	'm1_Nucleotide metabolism'	'm1_Cmpk1(lgFC:0.22743FDR:0.58323)'
'm1_HMR_8452'	'2 m1_dCDP[m1_c] <=> m1_dCMP[m1_c] + m1_dCTP[m1_c]'	0	0	0	NaN	NaN	'm1_Nucleotide metabolism'	'm1_Cmpk1(lgFC:0.22743FDR:0.58323)'
'm1_HMR_8453'	'2 m1_dCDP[m1_n] <=> m1_dCMP[m1_n] + m1_dCTP[m1_n]'	0	0	0	NaN	NaN	'm1_Nucleotide metabolism'	'm1_Cmpk1(lgFC:0.22743FDR:0.58323)'
'm1_HMR_8454'	'm1_dADP[m1_c] + m1_dCDP[m1_c] <=> m1_dATP[m1_c] + m1_dCMP[m1_c]'	0	0	0	NaN	NaN	'm1_Nucleotide metabolism'	'm1_Cmpk1(lgFC:0.22743FDR:0.58323)'
'm1_HMR_8455'	'm1_dADP[m1_n] + m1_dCDP[m1_n] <=> m1_dATP[m1_n] + m1_dCMP[m1_n]'	0	0	0	NaN	NaN	'm1_Nucleotide metabolism'	'm1_Cmpk1(lgFC:0.22743FDR:0.58323)'
'm1_HMR_8456'	'm1_dCDP[m1_c] + m1_UDP[m1_c] <=> m1_dCMP[m1_c] + m1_UTP[m1_c]'	0	0	0	NaN	NaN	'm1_Nucleotide metabolism'	'm1_Cmpk1(lgFC:0.22743FDR:0.58323)'
'm1_HMR_8457'	'm1_dCDP[m1_n] + m1_UDP[m1_n] <=> m1_dCMP[m1_n] + m1_UTP[m1_n]'	0	0	0	NaN	NaN	'm1_Nucleotide metabolism'	'm1_Cmpk1(lgFC:0.22743FDR:0.58323)'
'm1_HMR_8458'	'm1_ADP[m1_n] + m1_CDP[m1_n] <=> m1_ATP[m1_n] + m1_CMP[m1_n]'	0	0	0	NaN	NaN	'm1_Nucleotide metabolism'	'm1_Cmpk1(lgFC:0.22743FDR:0.58323)'
'm1_HMR_8459'	'm1_ADP[m1_n] + m1_dCDP[m1_n] <=> m1_ATP[m1_n] + m1_dCMP[m1_n]'	0	0	0	NaN	NaN	'm1_Nucleotide metabolism'	'm1_Cmpk1(lgFC:0.22743FDR:0.58323)'
'm1_HMR_8460'	'm1_CDP[m1_n] + m1_dCDP[m1_n] <=> m1_CTP[m1_n] + m1_dCMP[m1_n]'	0	0	0	NaN	NaN	'm1_Nucleotide metabolism'	'm1_Cmpk1(lgFC:0.22743FDR:0.58323)'
'm1_HMR_8461'	'm1_dCDP[m1_c] + m1_GDP[m1_c] <=> m1_dCMP[m1_c] + m1_GTP[m1_c]'	0	0	0	NaN	NaN	'm1_Nucleotide metabolism'	''
'm1_HMR_8462'	'm1_dCDP[m1_n] + m1_GDP[m1_n] <=> m1_dCMP[m1_n] + m1_GTP[m1_n]'	0	0	0	NaN	NaN	'm1_Nucleotide metabolism'	'm1_Cmpk1(lgFC:0.22743FDR:0.58323)'
'm1_HMR_8463'	'm1_CDP[m1_c] + m1_dCDP[m1_c] <=> m1_CTP[m1_c] + m1_dCMP[m1_c]'	0	0	0	NaN	NaN	'm1_Nucleotide metabolism'	'm1_Cmpk1(lgFC:0.22743FDR:0.58323)'
'm1_HMR_8464'	'm1_CDP[m1_n] + m1_GDP[m1_n] <=> m1_CMP[m1_n] + m1_GTP[m1_n]'	0	0	0	NaN	NaN	'm1_Nucleotide metabolism'	'm1_Cmpk1(lgFC:0.22743FDR:0.58323)'
'm1_HMR_8465'	'2 m1_CDP[m1_c] <=> m1_CMP[m1_c] + m1_CTP[m1_c]'	0	-0.0104181	0.0104181	NaN	NaN	'm1_Nucleotide metabolism'	'm1_Cmpk1(lgFC:0.22743FDR:0.58323)'
'm1_HMR_8466'	'2 m1_CDP[m1_n] <=> m1_CMP[m1_n] + m1_CTP[m1_n]'	0	0	0	NaN	NaN	'm1_Nucleotide metabolism'	'm1_Cmpk1(lgFC:0.22743FDR:0.58323)'
'm1_HMR_8467'	'm1_CDP[m1_c] + m1_UDP[m1_c] <=> m1_CMP[m1_c] + m1_UTP[m1_c]'	0	0	0	NaN	NaN	'm1_Nucleotide metabolism'	'm1_Cmpk1(lgFC:0.22743FDR:0.58323)'
'm1_HMR_8468'	'm1_CDP[m1_n] + m1_UDP[m1_n] <=> m1_CMP[m1_n] + m1_UTP[m1_n]'	0	0	0	NaN	NaN	'm1_Nucleotide metabolism'	'm1_Cmpk1(lgFC:0.22743FDR:0.58323)'
'm1_HMR_8469'	'm1_CDP[m1_c] + m1_dADP[m1_c] <=> m1_CMP[m1_c] + m1_dATP[m1_c]'	0	0	0	NaN	NaN	'm1_Nucleotide metabolism'	'm1_Cmpk1(lgFC:0.22743FDR:0.58323)'
'm1_HMR_8470'	'm1_CDP[m1_n] + m1_dADP[m1_n] <=> m1_CMP[m1_n] + m1_dATP[m1_n]'	0	0	0	NaN	NaN	'm1_Nucleotide metabolism'	'm1_Cmpk1(lgFC:0.22743FDR:0.58323)'
'm1_HMR_8471'	'm1_CDP[m1_c] + m1_dCDP[m1_c] <=> m1_CMP[m1_c] + m1_dCTP[m1_c]'	0	0	0	NaN	NaN	'm1_Nucleotide metabolism'	'm1_Cmpk1(lgFC:0.22743FDR:0.58323)'
'm1_HMR_8472'	'm1_CDP[m1_n] + m1_dCDP[m1_n] <=> m1_CMP[m1_n] + m1_dCTP[m1_n]'	0	0	0	NaN	NaN	'm1_Nucleotide metabolism'	'm1_Cmpk1(lgFC:0.22743FDR:0.58323)'
'm1_HMR_8473'	'm1_deoxyadenosine[m1_s] + m1_H2O[m1_s] => m1_deoxyinosine[m1_s] + m1_NH3[m1_s]'	0	0	0	NaN	NaN	'm1_Nucleotide metabolism'	'm1_Ada(lgFC:-0.55239FDR:0.8001)'
'm1_HMR_8474'	'm1_ATP[m1_s] + 2 m1_H2O[m1_s] => m1_AMP[m1_s] + 2 m1_Pi[m1_s]'	0	0	0	NaN	NaN	'm1_Nucleotide metabolism'	'm1_Cant1(lgFC:0.00054726FDR:1) or m1_Entpd1(lgFC:-0.65711FDR:0.33817) or m1_Entpd2(lgFC:-0.53541FDR:0.56275) or m1_Entpd4(lgFC:-0.065582FDR:1) or m1_Entpd5(lgFC:0.037161FDR:1) or m1_Entpd6(lgFC:-0.091637FDR:0.9879) or m1_Entpd8(lgFC:-0.18924FDR:1)'
'm1_HMR_8478'	'm1_ADP[m1_n] + m1_dCMP[m1_n] <=> m1_ATP[m1_n] + m1_deoxycytidine[m1_n]'	0	0	0	NaN	NaN	'm1_Nucleotide metabolism'	'm1_Dck(lgFC:-0.29032FDR:0.84845)'
'm1_HMR_8479'	'm1_dCMP[m1_n] + m1_UDP[m1_n] <=> m1_deoxycytidine[m1_n] + m1_UTP[m1_n]'	0	0	0	NaN	NaN	'm1_Nucleotide metabolism'	'm1_Dck(lgFC:-0.29032FDR:0.84845)'
'm1_HMR_8480'	'm1_deoxycytidine[m1_n] + m1_H2O[m1_n] => m1_deoxyuridine[m1_n] + m1_NH3[m1_n]'	0	0	0	NaN	NaN	'm1_Nucleotide metabolism'	''
'm1_HMR_8481'	'm1_dADP[m1_m] + m1_dGDP[m1_m] <=> m1_dATP[m1_m] + m1_dGMP[m1_m]'	0	0	0	NaN	NaN	'm1_Nucleotide metabolism'	''
'm1_HMR_8482'	'm1_H+[m1_m] + m1_NADPH[m1_m] + m1_oxidized thioredoxin[m1_m] => m1_NADP+[m1_m] + m1_thioredoxin[m1_m]'	0	0	0	NaN	NaN	'm1_Nucleotide metabolism'	'm1_Txnrd1(lgFC:-0.075994FDR:0.97204) or m1_Txnrd2(lgFC:-0.037219FDR:1) or m1_Txnrd3(lgFC:-0.13103FDR:0.92145)'
'm1_HMR_8483'	'm1_dUTP[m1_n] + m1_H2O[m1_n] => m1_dUMP[m1_n] + m1_PPi[m1_n]'	0	0	0	NaN	NaN	'm1_Nucleotide metabolism'	'm1_Dut(lgFC:-0.43255FDR:0.47235)'
'm1_HMR_8485'	'm1_H2O[m1_g] + m1_UDP[m1_g] => m1_Pi[m1_g] + m1_UMP[m1_g]'	0	0	0	NaN	NaN	'm1_Nucleotide metabolism'	'm1_Cant1(lgFC:0.00054726FDR:1) or m1_Entpd4(lgFC:-0.065582FDR:1) or m1_Entpd6(lgFC:-0.091637FDR:0.9879)'
'm1_HMR_8486'	'm1_adenosine[m1_c] + m1_Pi[m1_c] <=> m1_adenine[m1_c] + m1_ribose-1-phosphate[m1_c]'	0	0	0	NaN	-4.0397e-13	'm1_Nucleotide metabolism'	'm1_Pnp(lgFC:0.21237FDR:0.78747)'
'm1_HMR_8487'	'm1_H2O[m1_s] + m1_UMP[m1_s] => m1_Pi[m1_s] + m1_uridine[m1_s]'	0	0	0	NaN	NaN	'm1_Nucleotide metabolism'	'm1_Nt5c3(lgFC:-0.090043FDR:0.97516) or m1_Nt5e(lgFC:0.66281FDR:0.38059)'
'm1_HMR_8488'	'm1_H2O[m1_c] + m1_XTP[m1_c] => m1_PPi[m1_c] + m1_xanthosine-5-phosphate[m1_c]'	0	0	0	NaN	NaN	'm1_Nucleotide metabolism'	'm1_Itpa(lgFC:0.31896FDR:0.28205)'
'm1_HMR_8489'	'm1_H2O[m1_c] + m1_ITP[m1_c] => m1_IMP[m1_c] + m1_PPi[m1_c]'	0	0	0	NaN	NaN	'm1_Nucleotide metabolism'	'm1_Itpa(lgFC:0.31896FDR:0.28205)'
'm1_HMR_3802'	'm1_glutamate[m1_m] + m1_H2O[m1_m] + m1_NAD+[m1_m] <=> m1_AKG[m1_m] + m1_H+[m1_m] + m1_NADH[m1_m] + m1_NH3[m1_m]'	4.32166	4.32166	8.64332	1	4.16405	'm1_Alanine, aspartate and glutamate metabolism'	'm1_Glud1(lgFC:-0.04078FDR:1)'
'm1_HMR_3804'	'm1_AKG[m1_m] + m1_H+[m1_m] + m1_NADPH[m1_m] + m1_NH3[m1_m] <=> m1_glutamate[m1_m] + m1_H2O[m1_m] + m1_NADP+[m1_m]'	0	-0.515775	0.515775	1	NaN	'm1_Alanine, aspartate and glutamate metabolism'	'm1_Glud1(lgFC:-0.04078FDR:1)'
'm1_HMR_3811'	'm1_aspartate[m1_c] + m1_ATP[m1_c] + m1_citrulline[m1_c] => m1_AMP[m1_c] + m1_argininosuccinate[m1_c] + m1_PPi[m1_c]'	0	0	0	NaN	NaN	'm1_Alanine, aspartate and glutamate metabolism'	'm1_Ass1(lgFC:-0.16173FDR:0.99256)'
'm1_HMR_3813'	'm1_arginine[m1_c] + m1_fumarate[m1_c] <=> m1_argininosuccinate[m1_c]'	1	0	1	NaN	1.20973	'm1_Alanine, aspartate and glutamate metabolism'	'm1_Asl(lgFC:0.47953FDR:0.57659) or m1_Crcp(lgFC:0.39243FDR:0.19222)'
'm1_HMR_3822'	'm1_1-pyrroline-5-carboxylate[m1_m] + 2 m1_H2O[m1_m] + m1_NAD+[m1_m] => m1_glutamate[m1_m] + m1_H+[m1_m] + m1_NADH[m1_m]'	0.38451	0.377725	0.762236	0.787553	0.461804	'm1_Alanine, aspartate and glutamate metabolism'	'm1_Aldh4a1(lgFC:-0.4877FDR:0.25935)'
'm1_HMR_3827'	'm1_AKG[m1_m] + m1_aspartate[m1_m] <=> m1_glutamate[m1_m] + m1_OAA[m1_m]'	-0.180154	-0.18217	0.362323	1.01119	-0.18217	'm1_Alanine, aspartate and glutamate metabolism'	'm1_Got2(lgFC:0.26533FDR:0.94457)'
'm1_HMR_3829'	'm1_AKG[m1_c] + m1_aspartate[m1_c] <=> m1_glutamate[m1_c] + m1_OAA[m1_c]'	0	-1.57413	1.57413	1.00219	NaN	'm1_Alanine, aspartate and glutamate metabolism'	'm1_Got1(lgFC:0.17494FDR:0.98301)'
'm1_HMR_3831'	'm1_aspartate[m1_c] => m1_fumarate[m1_c] + m1_NH3[m1_c]'	0	0	0	NaN	NaN	'm1_Alanine, aspartate and glutamate metabolism'	'm1_Fh1(lgFC:-0.054318FDR:1)'
'm1_HMR_3862'	'm1_asparagine[m1_m] + m1_H2O[m1_m] => m1_aspartate[m1_m] + m1_NH3[m1_m]'	0.000121243	0	0.000121243	NaN	0.000119024	'm1_Alanine, aspartate and glutamate metabolism'	'm1_Aspg(lgFC:-0.36224FDR:0.67603) or m1_Asrgl1(lgFC:0.16635FDR:0.71092)'
'm1_HMR_3865'	'm1_3-sulfinoalanine[m1_m] + m1_AKG[m1_m] => m1_3-sulfinylpyruvic acid[m1_m] + m1_glutamate[m1_m]'	0.180275	0.180275	0.36055	1.01119	0.182292	'm1_Alanine, aspartate and glutamate metabolism'	'm1_Got2(lgFC:0.26533FDR:0.94457)'
'm1_HMR_3873'	'2 m1_ATP[m1_m] + m1_CO2[m1_m] + m1_H2O[m1_m] + m1_NH3[m1_m] => 2 m1_ADP[m1_m] + m1_carbamoyl-phosphate[m1_m] + m1_Pi[m1_m]'	0	0	0	NaN	NaN	'm1_Alanine, aspartate and glutamate metabolism'	'm1_Cps1(lgFC:0.098308FDR:1)'
'm1_HMR_8654'	'2 m1_ATP[m1_m] + m1_H+[m1_m] + m1_HCO3-[m1_m] + m1_NH3[m1_m] => 2 m1_ADP[m1_m] + m1_carbamoyl-phosphate[m1_m] + m1_Pi[m1_m]'	0	0	0	NaN	NaN	'm1_Alanine, aspartate and glutamate metabolism'	'm1_Cps1(lgFC:0.098308FDR:1)'
'm1_HMR_3890'	'm1_ATP[m1_c] + m1_glutamate[m1_c] + m1_NH3[m1_c] => m1_ADP[m1_c] + m1_glutamine[m1_c] + m1_Pi[m1_c]'	0	0	0	NaN	NaN	'm1_Alanine, aspartate and glutamate metabolism'	'm1_Glul(lgFC:-0.073736FDR:1)'
'm1_HMR_3892'	'm1_glutamine[m1_m] + m1_H2O[m1_m] => m1_glutamate[m1_m] + m1_NH3[m1_m]'	0	0	0	NaN	NaN	'm1_Alanine, aspartate and glutamate metabolism'	'm1_Gls(lgFC:0.0039533FDR:1)'
'm1_HMR_9802'	'm1_glutamine[m1_c] + m1_H2O[m1_c] => m1_glutamate[m1_c] + m1_NH3[m1_c]'	0	0	0	NaN	0	'm1_Alanine, aspartate and glutamate metabolism'	'm1_Gls2(lgFC:-0.78594FDR:0.47079)'
'm1_HMR_3899'	'm1_AKG[m1_c] + m1_alanine[m1_c] <=> m1_glutamate[m1_c] + m1_pyruvate[m1_c]'	-0.371785	-0.371785	0.743569	1	-0.486601	'm1_Alanine, aspartate and glutamate metabolism'	''
'm1_HMR_3903'	'm1_aspartate[m1_c] + m1_ATP[m1_c] + m1_glutamine[m1_c] + m1_H2O[m1_c] => m1_AMP[m1_c] + m1_asparagine[m1_c] + m1_glutamate[m1_c] + m1_PPi[m1_c]'	0	0	0	0.9933	NaN	'm1_Alanine, aspartate and glutamate metabolism'	'm1_Asns(lgFC:-0.27395FDR:0.96126)'
'm1_HMR_4109'	'm1_AKG[m1_m] + m1_alanine[m1_m] <=> m1_glutamate[m1_m] + m1_pyruvate[m1_m]'	2.31133	2.59012	4.90146	1.12062	2.71879	'm1_Alanine, aspartate and glutamate metabolism'	'm1_Gpt2(lgFC:0.49623FDR:0.70618)'
'm1_HMR_4114'	'm1_2-oxoglutaramate[m1_c] + m1_H2O[m1_c] => m1_AKG[m1_c] + m1_NH3[m1_c]'	0	0	0	NaN	NaN	'm1_Alanine, aspartate and glutamate metabolism'	''
'm1_HMR_4115'	'm1_2-oxoglutaramate[m1_m] + m1_H2O[m1_m] => m1_AKG[m1_m] + m1_NH3[m1_m]'	0	0	0	NaN	NaN	'm1_Alanine, aspartate and glutamate metabolism'	''
'm1_HMR_4172'	'm1_asparagine[m1_c] + m1_H2O[m1_c] => m1_aspartate[m1_c] + m1_NH3[m1_c]'	0	0	0	NaN	NaN	'm1_Alanine, aspartate and glutamate metabolism'	'm1_Aspg(lgFC:-0.36224FDR:0.67603) or m1_Asrgl1(lgFC:0.16635FDR:0.71092)'
'm1_HMR_4196'	'm1_glutamine[m1_c] + m1_pyruvate[m1_c] => m1_2-oxoglutaramate[m1_c] + m1_alanine[m1_c]'	0	0	0	NaN	NaN	'm1_Alanine, aspartate and glutamate metabolism'	''
'm1_HMR_4197'	'm1_glutamine[m1_m] + m1_pyruvate[m1_m] => m1_2-oxoglutaramate[m1_m] + m1_alanine[m1_m]'	0	0	0	NaN	NaN	'm1_Alanine, aspartate and glutamate metabolism'	'm1_Aadat(lgFC:0.42555FDR:0.73193)'
'm1_HMR_4285'	'm1_H2O[m1_m] + m1_NAD+[m1_m] + m1_succinate semialdehyde[m1_m] => m1_H+[m1_m] + m1_NADH[m1_m] + m1_succinate[m1_m]'	0	0	0	NaN	NaN	'm1_Glutamate and glutamine metabolism'	'm1_Aldh5a1(lgFC:0.042286FDR:1)'
'm1_HMR_4690'	'm1_glutamate[m1_c] => m1_4-aminobutyrate[m1_c] + m1_CO2[m1_c]'	0	0	0	NaN	NaN	'm1_Alanine, aspartate and glutamate metabolism'	''
'm1_HMR_4693'	'm1_4-aminobutyrate[m1_m] + m1_AKG[m1_m] <=> m1_glutamate[m1_m] + m1_succinate semialdehyde[m1_m]'	0	0	0	NaN	NaN	'm1_Alanine, aspartate and glutamate metabolism'	'm1_Abat(lgFC:0.25529FDR:0.74379)'
'm1_HMR_6780'	'm1_AKG[m1_m] + m1_tyrosine[m1_m] => m1_4-hydroxyphenylpyruvate[m1_m] + m1_glutamate[m1_m]'	0	0	0	NaN	NaN	'm1_Alanine, aspartate and glutamate metabolism'	'm1_Got2(lgFC:0.26533FDR:0.94457) or m1_Tat(lgFC:0.1225FDR:1)'
'm1_HMR_6968'	'm1_CoA[m1_m] + m1_N-acetyl-L-asparagine[m1_m] <=> m1_acetyl-CoA[m1_m] + m1_asparagine[m1_m]'	0	0	0	NaN	NaN	'm1_Alanine, aspartate and glutamate metabolism'	'm1_Nags(lgFC:-0.0895FDR:0.98278)'
'm1_HMR_6969'	'm1_H2O[m1_c] + m1_N-acetyl-L-asparagine[m1_c] <=> m1_acetate[m1_c] + m1_asparagine[m1_c]'	0	0	0	NaN	NaN	'm1_Alanine, aspartate and glutamate metabolism'	'm1_Acy3(lgFC:-0.29954FDR:0.63569) or m1_Aspa(lgFC:-0.2776FDR:0.9104)'
'm1_HMR_9868'	'm1_(S)-2-aminobutanoate[m1_c] + m1_ATP[m1_c] + m1_glutamate[m1_c] => m1_ADP[m1_c] + m1_gamma-L-glutamyl-L-alpha-aminobutyrate[m1_c] + m1_Pi[m1_c]'	0	0	0	NaN	NaN	'm1_Alanine, aspartate and glutamate metabolism'	'm1_Gclc(lgFC:-0.37271FDR:0.37779) or m1_Gclm(lgFC:-0.041275FDR:1)'
'm1_HMR_6971'	'm1_gamma-L-glutamyl-L-alpha-aminobutyrate[m1_c] => m1_(S)-2-aminobutanoate[m1_c] + m1_5-oxoproline[m1_c]'	0	0	0	NaN	NaN	'm1_Alanine, aspartate and glutamate metabolism'	'm1_Ggct(lgFC:0.10869FDR:1)'
'm1_HMR_9867'	'm1_ATP[m1_c] + m1_glutamate[m1_c] + m1_GSH[m1_c] => m1_ADP[m1_c] + m1_gamma-glutamylglutathione[m1_c] + m1_Pi[m1_c]'	0	0	0	NaN	NaN	'm1_Alanine, aspartate and glutamate metabolism'	'm1_Gclc(lgFC:-0.37271FDR:0.37779) or m1_Gclm(lgFC:-0.041275FDR:1)'
'm1_HMR_6972'	'm1_gamma-glutamylglutathione[m1_c] => m1_5-oxoproline[m1_c] + m1_GSH[m1_c]'	0	0	0	NaN	NaN	'm1_Alanine, aspartate and glutamate metabolism'	'm1_Ggct(lgFC:0.10869FDR:1)'
'm1_HMR_7641'	'm1_D-aspartate[m1_p] + m1_H2O[m1_p] + m1_O2[m1_p] => m1_H2O2[m1_p] + m1_NH3[m1_p] + m1_OAA[m1_p]'	0	0	0	NaN	NaN	'm1_Alanine, aspartate and glutamate metabolism'	'm1_Ddo(lgFC:0.023428FDR:1)'
'm1_HMR_7642'	'm1_D-alanine[m1_c] => m1_alanine[m1_c]'	0	3.24847	3.24847	NaN	NaN	'm1_Alanine, aspartate and glutamate metabolism'	''
'm1_HMR_8626'	'm1_acetyl-CoA[m1_m] + m1_aspartate[m1_m] => m1_CoA[m1_m] + m1_N-acetyl-L-aspartate[m1_m]'	0	0	0	NaN	NaN	'm1_Alanine, aspartate and glutamate metabolism'	''
'm1_HMR_8628'	'm1_H2O[m1_c] + m1_N-acetyl-L-aspartate[m1_c] => m1_acetate[m1_c] + m1_aspartate[m1_c]'	0	0	0	NaN	NaN	'm1_Alanine, aspartate and glutamate metabolism'	'm1_Acy3(lgFC:-0.29954FDR:0.63569) or m1_Aspa(lgFC:-0.2776FDR:0.9104)'
'm1_HMR_3806'	'm1_H2O[m1_m] + m1_L-glutamate 5-semialdehyde[m1_m] + m1_NAD+[m1_m] => m1_glutamate[m1_m] + m1_H+[m1_m] + m1_NADH[m1_m]'	0.206751	0.206843	0.413594	0.787553	0.162827	'm1_Arginine and proline metabolism'	'm1_Aldh4a1(lgFC:-0.4877FDR:0.25935)'
'm1_HMR_3807'	'm1_AKG[m1_m] + m1_ornithine[m1_m] <=> m1_glutamate[m1_m] + m1_L-glutamate 5-semialdehyde[m1_m]'	0.206751	0.206843	0.413594	1.00045	0.206843	'm1_Arginine and proline metabolism'	'm1_Oat(lgFC:0.069454FDR:0.99096)'
'm1_HMR_3809'	'm1_citrulline[m1_m] + m1_Pi[m1_m] <=> m1_carbamoyl-phosphate[m1_m] + m1_ornithine[m1_m]'	0	0	0	NaN	NaN	'm1_Arginine and proline metabolism'	'm1_Otc(lgFC:-0.44287FDR:0.91221)'
'm1_HMR_3816'	'm1_arginine[m1_c] + m1_H2O[m1_c] => m1_ornithine[m1_c] + m1_urea[m1_c]'	0	0	0	NaN	NaN	'm1_Arginine and proline metabolism'	'm1_Arg1(lgFC:0.41544FDR:0.86617) or m1_Arg2(lgFC:0.16346FDR:1)'
'm1_HMR_3819'	'm1_1-pyrroline-5-carboxylate[m1_c] + m1_H2O[m1_c] <=> m1_L-glutamate 5-semialdehyde[m1_c]'	0	0	0	NaN	0	'm1_Arginine and proline metabolism'	'm1_Aldh4a1(lgFC:-0.4877FDR:0.25935)'
'm1_HMR_3820'	'm1_1-pyrroline-5-carboxylate[m1_m] + m1_H2O[m1_m] <=> m1_L-glutamate 5-semialdehyde[m1_m]'	0	0	0	NaN	0	'm1_Arginine and proline metabolism'	'm1_Aldh4a1(lgFC:-0.4877FDR:0.25935)'
'm1_HMR_3832'	'm1_arginine[m1_c] + m1_H2O[m1_c] => m1_citrulline[m1_c] + m1_NH3[m1_c]'	0	0	0	NaN	NaN	'm1_Arginine and proline metabolism'	''
'm1_HMR_3833'	'm1_1-pyrroline-5-carboxylate[m1_c] + m1_H+[m1_c] + m1_NADPH[m1_c] => m1_NADP+[m1_c] + m1_proline[m1_c]'	0	0	0	NaN	NaN	'm1_Arginine and proline metabolism'	'm1_Pycr1(lgFC:-0.86466FDR:0.59858) or m1_Pycr2(lgFC:0.41766FDR:0.58932)'
'm1_HMR_3835'	'm1_1-pyrroline-5-carboxylate[m1_c] + m1_H+[m1_c] + m1_NADH[m1_c] => m1_NAD+[m1_c] + m1_proline[m1_c]'	0	0	0	NaN	NaN	'm1_Arginine and proline metabolism'	'm1_Pycr1(lgFC:-0.86466FDR:0.59858) or m1_Pycr2(lgFC:0.41766FDR:0.58932)'
'm1_HMR_3837'	'm1_1-pyrroline-5-carboxylate[m1_m] + m1_H+[m1_m] + m1_NADH[m1_m] => m1_NAD+[m1_m] + m1_proline[m1_m]'	0	0	0	NaN	NaN	'm1_Arginine and proline metabolism'	'm1_Pycr1(lgFC:-0.86466FDR:0.59858) or m1_Pycr2(lgFC:0.41766FDR:0.58932)'
'm1_HMR_3838'	'm1_1-pyrroline-5-carboxylate[m1_m] + m1_ubiquinol[m1_m] <=> m1_proline[m1_m] + m1_ubiquinone[m1_m]'	-0.38451	-0.377725	0.762236	0.982355	-0.576032	'm1_Arginine and proline metabolism'	'm1_Prodh(lgFC:-0.017649FDR:1) or m1_Prodh2(lgFC:-0.23315FDR:0.76351)'
'm1_HMR_3895'	'm1_ATP[m1_m] + m1_glutamate[m1_m] => m1_ADP[m1_m] + m1_glutamyl-5-phosphate[m1_m]'	0	0	0	NaN	NaN	'm1_Arginine and proline metabolism'	'm1_Aldh18a1(lgFC:-0.42826FDR:0.804)'
'm1_HMR_3897'	'm1_glutamyl-5-phosphate[m1_m] + m1_H+[m1_m] + m1_NADPH[m1_m] => m1_L-glutamate 5-semialdehyde[m1_m] + m1_NADP+[m1_m] + m1_Pi[m1_m]'	0	0	0	NaN	NaN	'm1_Arginine and proline metabolism'	'm1_Aldh18a1(lgFC:-0.42826FDR:0.804)'
'm1_HMR_3956'	'm1_CO2[m1_m] + m1_H2O[m1_m] => m1_H+[m1_m] + m1_HCO3-[m1_m]'	0.0088825	0.0083423	0.0172248	0.939183	0.0083423	'm1_Arginine and proline metabolism'	'm1_Car5a(lgFC:-0.41282FDR:0.51121) or m1_Car5b(lgFC:0.019504FDR:1)'
'm1_HMR_3993'	'm1_H+[m1_c] + 2 m1_N-(omega)-hydroxyarginine[m1_c] + m1_NADPH[m1_c] + 2 m1_O2[m1_c] => 2 m1_citrulline[m1_c] + 2 m1_H2O[m1_c] + m1_NADP+[m1_c] + 2 m1_NO[m1_c]'	0	0	0	NaN	NaN	'm1_Arginine and proline metabolism'	'm1_Nos1(lgFC:0.38029FDR:0.99146) or m1_Nos2(lgFC:-1.4898FDR:0.77693) or m1_Nos3(lgFC:0.19098FDR:0.98053)'
'm1_HMR_4073'	'm1_H+[m1_c] + m1_SAM[m1_c] => m1_CO2[m1_c] + m1_S-adenosylmethioninamine[m1_c]'	0	0	0	NaN	NaN	'm1_Arginine and proline metabolism'	'm1_Amd1(lgFC:-0.09316FDR:0.99146)'
'm1_HMR_4075'	'm1_putrescine[m1_c] + m1_S-adenosylmethioninamine[m1_c] => m1_5-methylthioadenosine[m1_c] + m1_H+[m1_c] + m1_spermidine[m1_c]'	0	0	0	NaN	NaN	'm1_Arginine and proline metabolism'	'm1_Srm(lgFC:0.019565FDR:1)'
'm1_HMR_4077'	'm1_S-adenosylmethioninamine[m1_c] + m1_spermidine[m1_c] => m1_5-methylthioadenosine[m1_c] + m1_H+[m1_c] + m1_spermine[m1_c]'	0	0	0	NaN	NaN	'm1_Arginine and proline metabolism'	'm1_Sms(lgFC:-0.073029FDR:1) or m1_Srm(lgFC:0.019565FDR:1)'
'm1_HMR_4190'	'm1_arginine[m1_c] + m1_H+[m1_c] + m1_NADPH[m1_c] + m1_O2[m1_c] <=> m1_H2O[m1_c] + m1_N-(omega)-hydroxyarginine[m1_c] + m1_NADP+[m1_c]'	0	0	0	NaN	NaN	'm1_Arginine and proline metabolism'	'm1_Nos1(lgFC:0.38029FDR:0.99146) or m1_Nos2(lgFC:-1.4898FDR:0.77693) or m1_Nos3(lgFC:0.19098FDR:0.98053)'
'm1_HMR_4191'	'm1_arginine[m1_m] => m1_agmatine[m1_m] + m1_CO2[m1_m]'	0	0	0	NaN	NaN	'm1_Arginine and proline metabolism'	''
'm1_HMR_4212'	'm1_ornithine[m1_c] => m1_CO2[m1_c] + m1_putrescine[m1_c]'	0	0	0	NaN	NaN	'm1_Arginine and proline metabolism'	'm1_Odc1(lgFC:0.34638FDR:0.53168)'
'm1_HMR_4422'	'm1_ornithine[m1_s] => m1_CO2[m1_s] + m1_putrescine[m1_s]'	0	0	0	NaN	NaN	'm1_Arginine and proline metabolism'	'm1_Odc1(lgFC:0.34638FDR:0.53168)'
'm1_HMR_4423'	'm1_H2O[m1_s] + m1_O2[m1_s] + m1_putrescine[m1_s] => m1_4-aminobutanal[m1_s] + m1_H2O2[m1_s] + m1_NH3[m1_s]'	0	0	0	NaN	NaN	'm1_Arginine and proline metabolism'	'm1_Aoc2(lgFC:0.73402FDR:0.61336) or m1_Aoc3(lgFC:-0.59812FDR:0.92597)'
'm1_HMR_4424'	'm1_agmatine[m1_m] + m1_H2O[m1_m] => m1_putrescine[m1_m] + m1_urea[m1_m]'	0	0	0	NaN	NaN	'm1_Arginine and proline metabolism'	'm1_Agmat(lgFC:0.16832FDR:0.88915)'
'm1_HMR_4583'	'm1_creatine[m1_c] + m1_SAH[m1_c] <=> m1_guanidinoacetate[m1_c] + m1_SAM[m1_c]'	0.000908334	0.000781249	0.00168958	NaN	0.000781249	'm1_Arginine and proline metabolism'	'm1_Gamt(lgFC:-0.7576FDR:0.65752)'
'm1_HMR_4606'	'm1_4-aminobutyrate[m1_c] + m1_ATP[m1_c] + m1_histidine[m1_c] => m1_AMP[m1_c] + m1_homocarnosine[m1_c] + m1_PPi[m1_c]'	0	0	0	NaN	NaN	'm1_Arginine and proline metabolism'	'm1_Carns1(lgFC:0.073566FDR:1)'
'm1_HMR_4607'	'm1_H2O[m1_c] + m1_homocarnosine[m1_c] => m1_4-aminobutyrate[m1_c] + m1_histidine[m1_c]'	0	0	0	NaN	NaN	'm1_Arginine and proline metabolism'	'm1_Cndp2(lgFC:-0.14031FDR:0.99096)'
'm1_HMR_4776'	'm1_AKG[m1_c] + m1_O2[m1_c] + m1_proline[m1_c] => m1_CO2[m1_c] + m1_succinate[m1_c] + m1_trans-4-hydroxy-L-proline[m1_c]'	0	0	0	NaN	NaN	'm1_Arginine and proline metabolism'	'm1_P4ha1(lgFC:-0.20282FDR:0.88442)'
'm1_HMR_4777'	'm1_AKG[m1_m] + m1_O2[m1_m] + m1_proline[m1_m] => m1_CO2[m1_m] + m1_succinate[m1_m] + m1_trans-4-hydroxy-L-proline[m1_m]'	0	0	0	NaN	NaN	'm1_Arginine and proline metabolism'	'm1_P4ha1(lgFC:-0.20282FDR:0.88442)'
'm1_HMR_4778'	'm1_NAD+[m1_c] + m1_trans-4-hydroxy-L-proline[m1_c] => m1_H+[m1_c] + m1_L-1-pyrroline-3-hydroxy-5-carboxylate[m1_c] + m1_NADH[m1_c]'	0	0	0	NaN	NaN	'm1_Arginine and proline metabolism'	'm1_Pycr1(lgFC:-0.86466FDR:0.59858) or m1_Pycr2(lgFC:0.41766FDR:0.58932)'
'm1_HMR_4779'	'm1_NAD+[m1_m] + m1_trans-4-hydroxy-L-proline[m1_m] => m1_H+[m1_m] + m1_L-1-pyrroline-3-hydroxy-5-carboxylate[m1_m] + m1_NADH[m1_m]'	0	0	0	NaN	NaN	'm1_Arginine and proline metabolism'	'm1_Pycr1(lgFC:-0.86466FDR:0.59858) or m1_Pycr2(lgFC:0.41766FDR:0.58932)'
'm1_HMR_4780'	'm1_NADP+[m1_c] + m1_trans-4-hydroxy-L-proline[m1_c] <=> m1_H+[m1_c] + m1_L-1-pyrroline-3-hydroxy-5-carboxylate[m1_c] + m1_NADPH[m1_c]'	0	0	0	NaN	NaN	'm1_Arginine and proline metabolism'	'm1_Pycr1(lgFC:-0.86466FDR:0.59858) or m1_Pycr2(lgFC:0.41766FDR:0.58932)'
'm1_HMR_4781'	'm1_NADP+[m1_m] + m1_trans-4-hydroxy-L-proline[m1_m] <=> m1_H+[m1_m] + m1_L-1-pyrroline-3-hydroxy-5-carboxylate[m1_m] + m1_NADPH[m1_m]'	0	0	0	NaN	NaN	'm1_Arginine and proline metabolism'	'm1_Pycr1(lgFC:-0.86466FDR:0.59858) or m1_Pycr2(lgFC:0.41766FDR:0.58932)'
'm1_HMR_4782'	'2 m1_H+[m1_c] + m1_O2[m1_c] + m1_trans-4-hydroxy-L-proline[m1_c] => 2 m1_H2O[m1_c] + m1_L-1-pyrroline-3-hydroxy-5-carboxylate[m1_c]'	0	0	0	NaN	NaN	'm1_Arginine and proline metabolism'	''
'm1_HMR_4783'	'2 m1_H+[m1_m] + m1_O2[m1_m] + m1_trans-4-hydroxy-L-proline[m1_m] => 2 m1_H2O[m1_m] + m1_L-1-pyrroline-3-hydroxy-5-carboxylate[m1_m]'	0	0	0	NaN	NaN	'm1_Arginine and proline metabolism'	''
'm1_HMR_4784'	'2 m1_H2O[m1_m] + m1_L-1-pyrroline-3-hydroxy-5-carboxylate[m1_m] + m1_NAD+[m1_m] => m1_H+[m1_m] + m1_L-erythro-4-hydroxyglutamate[m1_m] + m1_NADH[m1_m]'	0	0	0	NaN	0	'm1_Arginine and proline metabolism'	'm1_Aldh4a1(lgFC:-0.4877FDR:0.25935)'
'm1_HMR_4786'	'm1_AKG[m1_m] + m1_L-erythro-4-hydroxyglutamate[m1_m] => m1_4-hydroxy-2-oxoglutarate[m1_m] + m1_glutamate[m1_m]'	0	0	0	NaN	NaN	'm1_Arginine and proline metabolism'	'm1_Got1(lgFC:0.17494FDR:0.98301) or m1_Got2(lgFC:0.26533FDR:0.94457)'
'm1_HMR_4787'	'm1_4-hydroxy-2-oxoglutarate[m1_m] => m1_glyoxalate[m1_m] + m1_pyruvate[m1_m]'	0	0	0	NaN	NaN	'm1_Arginine and proline metabolism'	'm1_Hoga1(lgFC:0.085746FDR:1)'
'm1_HMR_5384'	'm1_5-methylthioadenosine[m1_c] + m1_Pi[m1_c] => m1_adenine[m1_c] + m1_methylthioribose-1p[m1_c]'	0	0	0	NaN	NaN	'm1_Arginine and proline metabolism'	'm1_Mtap(lgFC:0.21641FDR:0.46493)'
'm1_HMR_6929'	'm1_CoA[m1_c] + m1_N1-acetylspermine[m1_c] <=> m1_acetyl-CoA[m1_c] + m1_spermine[m1_c]'	0	0	0	NaN	NaN	'm1_Arginine and proline metabolism'	'm1_Sat1(lgFC:-0.27199FDR:0.80657) or m1_Sat2(lgFC:0.26162FDR:0.67459)'
'm1_HMR_6930'	'm1_CoA[m1_p] + m1_N1-acetylspermine[m1_p] <=> m1_acetyl-CoA[m1_p] + m1_spermine[m1_p]'	0	0	0	NaN	NaN	'm1_Arginine and proline metabolism'	'm1_Sat1(lgFC:-0.27199FDR:0.80657) or m1_Sat2(lgFC:0.26162FDR:0.67459)'
'm1_HMR_6931'	'm1_H2O[m1_c] + m1_O2[m1_c] + m1_spermine[m1_c] => m1_H2O2[m1_c] + m1_NH3[m1_c] + m1_spermine monoaldehyde[m1_c]'	0	0	0	NaN	NaN	'm1_Arginine and proline metabolism'	'm1_Aoc2(lgFC:0.73402FDR:0.61336) or m1_Aoc3(lgFC:-0.59812FDR:0.92597)'
'm1_HMR_6932'	'm1_H2O[m1_s] + m1_O2[m1_s] + m1_spermine[m1_s] => m1_H2O2[m1_s] + m1_NH3[m1_s] + m1_spermine monoaldehyde[m1_s]'	0	0	0	NaN	NaN	'm1_Arginine and proline metabolism'	'm1_Aoc2(lgFC:0.73402FDR:0.61336) or m1_Aoc3(lgFC:-0.59812FDR:0.92597)'
'm1_HMR_6933'	'm1_H2O[m1_p] + m1_O2[m1_p] + m1_spermine[m1_p] => m1_H2O2[m1_p] + m1_NH3[m1_p] + m1_spermine monoaldehyde[m1_p]'	0	0	0	NaN	NaN	'm1_Arginine and proline metabolism'	'm1_Aoc2(lgFC:0.73402FDR:0.61336) or m1_Aoc3(lgFC:-0.59812FDR:0.92597)'
'm1_HMR_6934'	'm1_H2O[m1_c] + m1_O2[m1_c] + m1_spermine monoaldehyde[m1_c] => m1_H2O2[m1_c] + m1_NH3[m1_c] + m1_spermine dialdehyde[m1_c]'	0	0	0	NaN	NaN	'm1_Arginine and proline metabolism'	'm1_Aoc2(lgFC:0.73402FDR:0.61336) or m1_Aoc3(lgFC:-0.59812FDR:0.92597)'
'm1_HMR_6935'	'm1_H2O[m1_s] + m1_O2[m1_s] + m1_spermine monoaldehyde[m1_s] => m1_H2O2[m1_s] + m1_NH3[m1_s] + m1_spermine dialdehyde[m1_s]'	0	0	0	NaN	NaN	'm1_Arginine and proline metabolism'	'm1_Aoc2(lgFC:0.73402FDR:0.61336) or m1_Aoc3(lgFC:-0.59812FDR:0.92597)'
'm1_HMR_6936'	'm1_H2O[m1_p] + m1_O2[m1_p] + m1_spermine monoaldehyde[m1_p] => m1_H2O2[m1_p] + m1_NH3[m1_p] + m1_spermine dialdehyde[m1_p]'	0	0	0	NaN	NaN	'm1_Arginine and proline metabolism'	'm1_Aoc2(lgFC:0.73402FDR:0.61336) or m1_Aoc3(lgFC:-0.59812FDR:0.92597)'
'm1_HMR_6938'	'm1_CoA[m1_c] + m1_N1-acetylspermidine[m1_c] <=> m1_acetyl-CoA[m1_c] + m1_spermidine[m1_c]'	0	0	0	NaN	NaN	'm1_Arginine and proline metabolism'	'm1_Sat1(lgFC:-0.27199FDR:0.80657) or m1_Sat2(lgFC:0.26162FDR:0.67459)'
'm1_HMR_6939'	'm1_CoA[m1_p] + m1_N1-acetylspermidine[m1_p] <=> m1_acetyl-CoA[m1_p] + m1_spermidine[m1_p]'	0	0	0	NaN	NaN	'm1_Arginine and proline metabolism'	'm1_Sat1(lgFC:-0.27199FDR:0.80657) or m1_Sat2(lgFC:0.26162FDR:0.67459)'
'm1_HMR_6941'	'm1_H2O[m1_c] + m1_O2[m1_c] + m1_spermidine[m1_c] => m1_H2O2[m1_c] + m1_NH3[m1_c] + m1_spermidine monoaldehyde 1[m1_c]'	0	0	0	NaN	NaN	'm1_Arginine and proline metabolism'	'm1_Aoc2(lgFC:0.73402FDR:0.61336) or m1_Aoc3(lgFC:-0.59812FDR:0.92597)'
'm1_HMR_6942'	'm1_H2O[m1_s] + m1_O2[m1_s] + m1_spermidine[m1_s] => m1_H2O2[m1_s] + m1_NH3[m1_s] + m1_spermidine monoaldehyde 1[m1_s]'	0	0	0	NaN	NaN	'm1_Arginine and proline metabolism'	'm1_Aoc2(lgFC:0.73402FDR:0.61336) or m1_Aoc3(lgFC:-0.59812FDR:0.92597)'
'm1_HMR_6943'	'm1_H2O[m1_p] + m1_O2[m1_p] + m1_spermidine[m1_p] => m1_H2O2[m1_p] + m1_NH3[m1_p] + m1_spermidine monoaldehyde 1[m1_p]'	0	0	0	NaN	NaN	'm1_Arginine and proline metabolism'	'm1_Aoc2(lgFC:0.73402FDR:0.61336) or m1_Aoc3(lgFC:-0.59812FDR:0.92597)'
'm1_HMR_6944'	'm1_H2O[m1_c] + m1_O2[m1_c] + m1_spermidine[m1_c] => m1_H2O2[m1_c] + m1_NH3[m1_c] + m1_spermidine monoaldehyde 2[m1_c]'	0	0	0	NaN	NaN	'm1_Arginine and proline metabolism'	'm1_Aoc2(lgFC:0.73402FDR:0.61336) or m1_Aoc3(lgFC:-0.59812FDR:0.92597)'
'm1_HMR_6945'	'm1_H2O[m1_s] + m1_O2[m1_s] + m1_spermidine[m1_s] => m1_H2O2[m1_s] + m1_NH3[m1_s] + m1_spermidine monoaldehyde 2[m1_s]'	0	0	0	NaN	NaN	'm1_Arginine and proline metabolism'	'm1_Aoc2(lgFC:0.73402FDR:0.61336) or m1_Aoc3(lgFC:-0.59812FDR:0.92597)'
'm1_HMR_6946'	'm1_H2O[m1_p] + m1_O2[m1_p] + m1_spermidine[m1_p] => m1_H2O2[m1_p] + m1_NH3[m1_p] + m1_spermidine monoaldehyde 2[m1_p]'	0	0	0	NaN	NaN	'm1_Arginine and proline metabolism'	'm1_Aoc2(lgFC:0.73402FDR:0.61336) or m1_Aoc3(lgFC:-0.59812FDR:0.92597)'
'm1_HMR_6947'	'm1_H2O[m1_c] + m1_O2[m1_c] + m1_spermidine monoaldehyde 1[m1_c] => m1_H2O2[m1_c] + m1_NH3[m1_c] + m1_spermidine dialdehyde[m1_c]'	0	0	0	NaN	NaN	'm1_Arginine and proline metabolism'	'm1_Aoc2(lgFC:0.73402FDR:0.61336) or m1_Aoc3(lgFC:-0.59812FDR:0.92597)'
'm1_HMR_6948'	'm1_H2O[m1_s] + m1_O2[m1_s] + m1_spermidine monoaldehyde 1[m1_s] => m1_H2O2[m1_s] + m1_NH3[m1_s] + m1_spermidine dialdehyde[m1_s]'	0	0	0	NaN	NaN	'm1_Arginine and proline metabolism'	'm1_Aoc2(lgFC:0.73402FDR:0.61336) or m1_Aoc3(lgFC:-0.59812FDR:0.92597)'
'm1_HMR_6949'	'm1_H2O[m1_p] + m1_O2[m1_p] + m1_spermidine monoaldehyde 1[m1_p] => m1_H2O2[m1_p] + m1_NH3[m1_p] + m1_spermidine dialdehyde[m1_p]'	0	0	0	NaN	NaN	'm1_Arginine and proline metabolism'	'm1_Aoc2(lgFC:0.73402FDR:0.61336) or m1_Aoc3(lgFC:-0.59812FDR:0.92597)'
'm1_HMR_6950'	'm1_H2O[m1_c] + m1_O2[m1_c] + m1_spermidine monoaldehyde 2[m1_c] => m1_H2O2[m1_c] + m1_NH3[m1_c] + m1_spermidine dialdehyde[m1_c]'	0	0	0	NaN	NaN	'm1_Arginine and proline metabolism'	'm1_Aoc2(lgFC:0.73402FDR:0.61336) or m1_Aoc3(lgFC:-0.59812FDR:0.92597)'
'm1_HMR_6951'	'm1_H2O[m1_s] + m1_O2[m1_s] + m1_spermidine monoaldehyde 2[m1_s] => m1_H2O2[m1_s] + m1_NH3[m1_s] + m1_spermidine dialdehyde[m1_s]'	0	0	0	NaN	NaN	'm1_Arginine and proline metabolism'	'm1_Aoc2(lgFC:0.73402FDR:0.61336) or m1_Aoc3(lgFC:-0.59812FDR:0.92597)'
'm1_HMR_6952'	'm1_H2O[m1_p] + m1_O2[m1_p] + m1_spermidine monoaldehyde 2[m1_p] => m1_H2O2[m1_p] + m1_NH3[m1_p] + m1_spermidine dialdehyde[m1_p]'	0	0	0	NaN	NaN	'm1_Arginine and proline metabolism'	'm1_Aoc2(lgFC:0.73402FDR:0.61336) or m1_Aoc3(lgFC:-0.59812FDR:0.92597)'
'm1_HMR_6953'	'm1_H2O[m1_c] + m1_NAD+[m1_c] + m1_spermidine monoaldehyde 1[m1_c] => m1_H+[m1_c] + m1_NADH[m1_c] + m1_putreanine[m1_c]'	0	0	0	NaN	NaN	'm1_Arginine and proline metabolism'	'm1_Aldh8a1(lgFC:-0.16071FDR:0.70472) or m1_Far1(lgFC:0.031899FDR:1) or m1_Far2(lgFC:0.67384FDR:0.6832)'
'm1_HMR_6954'	'm1_H2O[m1_c] + m1_NAD+[m1_c] + m1_spermidine monoaldehyde 2[m1_c] => m1_H+[m1_c] + m1_isoputreanine[m1_c] + m1_NADH[m1_c]'	0	0	0	NaN	NaN	'm1_Arginine and proline metabolism'	'm1_Aldh8a1(lgFC:-0.16071FDR:0.70472) or m1_Far1(lgFC:0.031899FDR:1) or m1_Far2(lgFC:0.67384FDR:0.6832)'
'm1_HMR_6956'	'm1_CoA[m1_c] + m1_N1,N12-diacetylspermine[m1_c] <=> m1_acetyl-CoA[m1_c] + m1_N1-acetylspermine[m1_c]'	0	0	0	NaN	NaN	'm1_Arginine and proline metabolism'	''
'm1_HMR_6957'	'm1_CoA[m1_p] + m1_N1,N12-diacetylspermine[m1_p] <=> m1_acetyl-CoA[m1_p] + m1_N1-acetylspermine[m1_p]'	0	0	0	NaN	NaN	'm1_Arginine and proline metabolism'	''
'm1_HMR_6958'	'm1_H2O[m1_c] + m1_N1-acetylspermine[m1_c] + m1_O2[m1_c] => m1_acetamidopropanal[m1_c] + m1_H2O2[m1_c] + m1_spermidine[m1_c]'	0	0	0	NaN	0	'm1_Arginine and proline metabolism'	'm1_Paox(lgFC:-0.7364FDR:0.073321) or m1_Smox(lgFC:-0.017602FDR:1)'
'm1_HMR_6959'	'm1_H2O[m1_p] + m1_N1-acetylspermine[m1_p] + m1_O2[m1_p] => m1_acetamidopropanal[m1_p] + m1_H2O2[m1_p] + m1_spermidine[m1_p]'	0	0	0	NaN	0	'm1_Arginine and proline metabolism'	'm1_Paox(lgFC:-0.7364FDR:0.073321) or m1_Smox(lgFC:-0.017602FDR:1)'
'm1_HMR_6961'	'm1_H2O[m1_c] + m1_N1-acetylspermidine[m1_c] + m1_O2[m1_c] => m1_acetamidopropanal[m1_c] + m1_H2O2[m1_c] + m1_putrescine[m1_c]'	0	0	0	NaN	0	'm1_Arginine and proline metabolism'	'm1_Paox(lgFC:-0.7364FDR:0.073321) or m1_Smox(lgFC:-0.017602FDR:1)'
'm1_HMR_6962'	'm1_H2O[m1_p] + m1_N1-acetylspermidine[m1_p] + m1_O2[m1_p] => m1_acetamidopropanal[m1_p] + m1_H2O2[m1_p] + m1_putrescine[m1_p]'	0	0	0	NaN	0	'm1_Arginine and proline metabolism'	'm1_Paox(lgFC:-0.7364FDR:0.073321) or m1_Smox(lgFC:-0.017602FDR:1)'
'm1_HMR_6963'	'm1_H2O[m1_c] + m1_N1,N12-diacetylspermine[m1_c] + m1_O2[m1_c] => m1_acetamidopropanal[m1_c] + m1_H2O2[m1_c] + m1_N1-acetylspermidine[m1_c]'	0	0	0	NaN	0	'm1_Arginine and proline metabolism'	'm1_Paox(lgFC:-0.7364FDR:0.073321) or m1_Smox(lgFC:-0.017602FDR:1)'
'm1_HMR_6964'	'm1_H2O[m1_p] + m1_N1,N12-diacetylspermine[m1_p] + m1_O2[m1_p] => m1_acetamidopropanal[m1_p] + m1_H2O2[m1_p] + m1_N1-acetylspermidine[m1_p]'	0	0	0	NaN	0	'm1_Arginine and proline metabolism'	'm1_Paox(lgFC:-0.7364FDR:0.073321) or m1_Smox(lgFC:-0.017602FDR:1)'
'm1_HMR_6965'	'm1_NAD+[m1_c] + m1_spermidine[m1_c] => m1_dehydrospermidine[m1_c] + m1_H+[m1_c] + m1_NADH[m1_c]'	0	0	0	NaN	NaN	'm1_Arginine and proline metabolism'	'm1_Dhps(lgFC:0.15614FDR:0.88604)'
'm1_HMR_6966'	'm1_1,3-diaminopropane[m1_c] + m1_1-pyrroline[m1_c] <=> m1_dehydrospermidine[m1_c]'	0	0	0	NaN	NaN	'm1_Arginine and proline metabolism'	'm1_Dhps(lgFC:0.15614FDR:0.88604)'
'm1_HMR_6955'	'm1_1-pyrroline[m1_c] + m1_H2O[m1_c] <=> m1_4-aminobutanal[m1_c]'	0	0	0	NaN	NaN	'm1_Arginine and proline metabolism'	''
'm1_HMR_6967'	'm1_1,3-diaminopropane[m1_c] + m1_deoxyhypusine[m1_c] <=> m1_lysine[m1_c] + m1_spermidine[m1_c]'	0	0	0	NaN	NaN	'm1_Arginine and proline metabolism'	'm1_Dhps(lgFC:0.15614FDR:0.88604)'
'm1_HMR_6973'	'm1_H2O[m1_c] + m1_NAD+[m1_c] + m1_spermine monoaldehyde[m1_c] => m1_H+[m1_c] + m1_NADH[m1_c] + m1_spermic acid 1[m1_c]'	0	0	0	NaN	NaN	'm1_Arginine and proline metabolism'	'm1_Aldh8a1(lgFC:-0.16071FDR:0.70472) or m1_Far1(lgFC:0.031899FDR:1) or m1_Far2(lgFC:0.67384FDR:0.6832)'
'm1_HMR_8096'	'm1_H2O[m1_m] + m1_L-1-pyrroline-3-hydroxy-5-carboxylate[m1_m] <=> m1_L-4-hydroxyglutamate semialdehyde[m1_m]'	0	0	0	NaN	0	'm1_Arginine and proline metabolism'	'm1_Aldh4a1(lgFC:-0.4877FDR:0.25935)'
'm1_HMR_8097'	'm1_H2O[m1_m] + m1_L-4-hydroxyglutamate semialdehyde[m1_m] + m1_NAD+[m1_m] => m1_H+[m1_m] + m1_L-erythro-4-hydroxyglutamate[m1_m] + m1_NADH[m1_m]'	0	0	0	NaN	0	'm1_Arginine and proline metabolism'	'm1_Aldh4a1(lgFC:-0.4877FDR:0.25935)'
'm1_HMR_8098'	'm1_L-erythro-4-hydroxyglutamate[m1_m] + m1_OAA[m1_m] => m1_4-hydroxy-2-oxoglutarate[m1_m] + m1_aspartate[m1_m]'	0	0	0	NaN	NaN	'm1_Arginine and proline metabolism'	'm1_Got2(lgFC:0.26533FDR:0.94457)'
'm1_HMR_8416'	'm1_acetyl-CoA[m1_m] + m1_glutamate[m1_m] => m1_CoA[m1_m] + m1_N-acetyl-L-glutamate[m1_m]'	0	0	0	NaN	NaN	'm1_Arginine and proline metabolism'	'm1_Nags(lgFC:-0.0895FDR:0.98278)'
'm1_HMR_8425'	'm1_H2O[m1_c] + m1_N-acetylornithine[m1_c] <=> m1_acetate[m1_c] + m1_ornithine[m1_c]'	0	0	0	NaN	0	'm1_Arginine and proline metabolism'	'm1_Acy1(lgFC:-0.53202FDR:0.40886)'
'm1_HMR_8426'	'm1_arginine[m1_m] + m1_H2O[m1_m] => m1_ornithine[m1_m] + m1_urea[m1_m]'	0.206751	0.20666	0.413411	1.02233	0.211367	'm1_Arginine and proline metabolism'	'm1_Arg1(lgFC:0.41544FDR:0.86617) or m1_Arg2(lgFC:0.16346FDR:1)'
'm1_HMR_8427'	'm1_ADP[m1_m] + m1_creatine-phosphate[m1_m] + 2 m1_H+[m1_m] <=> m1_ATP[m1_m] + m1_creatine[m1_m]'	1	0	1	NaN	1.4851	'm1_Arginine and proline metabolism'	'm1_Ckb(lgFC:-0.48934FDR:0.62782) or m1_Ckm(lgFC:0.91318FDR:0.91724) or m1_Ckmt2(lgFC:2.0797FDR:0.53853)'
'm1_HMR_8431'	'm1_creatine-phosphate[m1_c] + 2 m1_H+[m1_c] => m1_creatinine[m1_c] + m1_Pi[m1_c]'	0	0	0	NaN	NaN	'm1_Arginine and proline metabolism'	''
'm1_HMR_8432'	'm1_FAD[m1_m] + m1_sarcosine[m1_m] + m1_THF[m1_m] => m1_5,10-methylene-THF[m1_m] + m1_FADH2[m1_m] + m1_glycine[m1_m]'	0.0643485	0.0906735	0.155022	0.997652	0.0641974	'm1_Arginine and proline metabolism'	'm1_Sardh(lgFC:-0.13165FDR:0.97308)'
'm1_HMR_8603'	'm1_acetyl-CoA[m1_c] + m1_putrescine[m1_c] => m1_CoA[m1_c] + m1_N-acetylputrescine[m1_c]'	0	0	0	NaN	NaN	'm1_Arginine and proline metabolism'	'm1_Sat1(lgFC:-0.27199FDR:0.80657) or m1_Sat2(lgFC:0.26162FDR:0.67459)'
'm1_HMR_8604'	'm1_H2O[m1_c] + m1_N-acetylputrescine[m1_c] + m1_O2[m1_c] => m1_H2O2[m1_c] + m1_N4-acetylaminobutanal[m1_c] + m1_NH3[m1_c]'	0	0	0	NaN	NaN	'm1_Arginine and proline metabolism'	'm1_Aoc2(lgFC:0.73402FDR:0.61336) or m1_Aoc3(lgFC:-0.59812FDR:0.92597) or m1_Maoa(lgFC:-0.0064235FDR:1) or m1_Maob(lgFC:-0.2131FDR:0.84186)'
'm1_HMR_8605'	'm1_H2O[m1_c] + m1_N4-acetylaminobutanal[m1_c] + m1_NAD+[m1_c] => m1_4-acetamidobutanoate[m1_c] + m1_H+[m1_c] + m1_NADH[m1_c]'	0	0	0	NaN	NaN	'm1_Arginine and proline metabolism'	'm1_Aldh1b1(lgFC:-0.28921FDR:0.73037) or m1_Aldh2(lgFC:-0.029657FDR:1) or m1_Aldh3a2(lgFC:-0.10108FDR:1) or m1_Aldh7a1(lgFC:-0.19043FDR:0.71271) or m1_Aldh9a1(lgFC:0.08386FDR:0.98923)'
'm1_HMR_8606'	'm1_H2O[m1_c] + m1_O2[m1_c] + m1_putrescine[m1_c] => m1_4-aminobutanal[m1_c] + m1_H2O2[m1_c] + m1_NH3[m1_c]'	1	0	1	NaN	1.25645	'm1_Arginine and proline metabolism'	'm1_Aoc2(lgFC:0.73402FDR:0.61336)'
'm1_HMR_8607'	'm1_4-methylthio-2-oxobutanoic acid[m1_c] + m1_glutamine[m1_c] + 2 m1_H+[m1_c] => m1_glutamate[m1_c] + m1_methionine[m1_c]'	0	0.62207	0.62207	NaN	NaN	'm1_Arginine and proline metabolism'	''
'm1_HMR_8608'	'm1_D-proline[m1_c] + m1_O2[m1_c] => m1_1-pyrroline-2-carboxylate[m1_c] + m1_H2O2[m1_c]'	0	0	0	NaN	NaN	'm1_Arginine and proline metabolism'	''
'm1_HMR_8609'	'm1_1-pyrroline-5-carboxylate[m1_m] + m1_H+[m1_m] + m1_NADPH[m1_m] => m1_NADP+[m1_m] + m1_proline[m1_m]'	0	0	0	NaN	NaN	'm1_Arginine and proline metabolism'	'm1_Pycr1(lgFC:-0.86466FDR:0.59858) or m1_Pycr2(lgFC:0.41766FDR:0.58932)'
'm1_HMR_8610'	'm1_FAD[m1_c] + m1_proline[m1_c] => m1_1-pyrroline-5-carboxylate[m1_c] + m1_FADH2[m1_c]'	0	0	0	NaN	NaN	'm1_Arginine and proline metabolism'	'm1_Prodh2(lgFC:-0.23315FDR:0.76351)'
'm1_HMR_8611'	'm1_FAD[m1_m] + m1_proline[m1_m] => m1_1-pyrroline-5-carboxylate[m1_m] + m1_FADH2[m1_m]'	0	0	0	NaN	NaN	'm1_Arginine and proline metabolism'	'm1_Prodh(lgFC:-0.017649FDR:1) or m1_Prodh2(lgFC:-0.23315FDR:0.76351)'
'm1_HMR_0457'	'm1_ATP[m1_c] + m1_glycerate[m1_c] => m1_3-phospho-D-glycerate[m1_c] + m1_ADP[m1_c]'	0	0	0	NaN	NaN	'm1_Glycine, serine and threonine metabolism'	'm1_Glyctk(lgFC:0.042365FDR:1)'
'm1_HMR_0460'	'm1_ATP[m1_m] + m1_glycerate[m1_m] => m1_3-phospho-D-glycerate[m1_m] + m1_ADP[m1_m]'	0	0	0	NaN	NaN	'm1_Glycine, serine and threonine metabolism'	'm1_Glyctk(lgFC:0.042365FDR:1)'
'm1_HMR_3750'	'm1_CoA[m1_m] + m1_isobutyrylglycine[m1_m] <=> m1_glycine[m1_m] + m1_isobutyryl-CoA[m1_m]'	0	0	0	NaN	NaN	'm1_Glycine, serine and threonine metabolism'	'm1_Glyat(lgFC:-0.11684FDR:1)'
'm1_HMR_3752'	'm1_FADH2[m1_m] + m1_methacrylyl-CoA[m1_m] <=> m1_FAD[m1_m] + m1_isobutyryl-CoA[m1_m]'	0	0.00323431	0.00323431	NaN	NaN	'm1_Glycine, serine and threonine metabolism'	'm1_Acadsb(lgFC:-0.24846FDR:0.81679)'
'm1_HMR_3770'	'm1_3-methylcrotonyl-CoA[m1_m] + m1_FADH2[m1_m] <=> m1_FAD[m1_m] + m1_isovaleryl-CoA[m1_m]'	0	0.117272	0.117272	NaN	NaN	'm1_Glycine, serine and threonine metabolism'	'm1_Acadsb(lgFC:-0.24846FDR:0.81679)'
'm1_HMR_3771'	'm1_CoA[m1_m] + m1_isovalerylglycine[m1_m] <=> m1_glycine[m1_m] + m1_isovaleryl-CoA[m1_m]'	0	0	0	NaN	NaN	'm1_Glycine, serine and threonine metabolism'	'm1_Glyat(lgFC:-0.11684FDR:1)'
'm1_HMR_3772'	'm1_3-methylcrotonoylglycine[m1_m] + m1_CoA[m1_m] <=> m1_3-methylcrotonyl-CoA[m1_m] + m1_glycine[m1_m]'	0	0	0	NaN	NaN	'm1_Glycine, serine and threonine metabolism'	'm1_Glyat(lgFC:-0.11684FDR:1)'
'm1_HMR_3782'	'm1_2-methylbutyryl-CoA[m1_m] + m1_glycine[m1_m] <=> m1_2-methylbutyrylglycine[m1_m] + m1_CoA[m1_m]'	0	0	0	NaN	NaN	'm1_Glycine, serine and threonine metabolism'	'm1_Glyat(lgFC:-0.11684FDR:1)'
'm1_HMR_3784'	'm1_2-methylbutyryl-CoA[m1_m] + m1_FAD[m1_m] <=> m1_FADH2[m1_m] + m1_tiglyl-CoA[m1_m]'	0	-0.000140422	0.000140422	NaN	NaN	'm1_Glycine, serine and threonine metabolism'	'm1_Acadsb(lgFC:-0.24846FDR:0.81679)'
'm1_HMR_3794'	'm1_CoA[m1_m] + m1_N-acetyl-L-alanine[m1_m] <=> m1_acetyl-CoA[m1_m] + m1_alanine[m1_m]'	0	0	0	NaN	NaN	'm1_Glycine, serine and threonine metabolism'	'm1_Nags(lgFC:-0.0895FDR:0.98278)'
'm1_HMR_3839'	'm1_3-phospho-D-glycerate[m1_c] + m1_NAD+[m1_c] <=> m1_3-phosphonooxypyruvate[m1_c] + m1_H+[m1_c] + m1_NADH[m1_c]'	0	0.0750334	0.0750334	NaN	NaN	'm1_Glycine, serine and threonine metabolism'	'm1_Phgdh(lgFC:-0.73187FDR:0.9391) or m1_Ubac2(lgFC:-0.048501FDR:0.99186)'
'm1_HMR_3841'	'm1_3-phosphonooxypyruvate[m1_c] + m1_glutamate[m1_c] <=> m1_3-phosphoserine[m1_c] + m1_AKG[m1_c]'	0	0.0750334	0.0750334	NaN	NaN	'm1_Glycine, serine and threonine metabolism'	'm1_Psat1(lgFC:0.64744FDR:0.81197)'
'm1_HMR_3843'	'm1_3-phosphoserine[m1_c] + m1_H2O[m1_c] => m1_Pi[m1_c] + m1_serine[m1_c]'	0	0.0750334	0.0750334	NaN	NaN	'm1_Glycine, serine and threonine metabolism'	'm1_Psph(lgFC:-0.016607FDR:1)'
'm1_HMR_3845'	'm1_serine[m1_c] + m1_THF[m1_c] <=> m1_5,10-methylene-THF[m1_c] + m1_glycine[m1_c] + m1_H2O[m1_c]'	-0.186222	-0.186452	0.372674	1.00124	-0.186112	'm1_Glycine, serine and threonine metabolism'	'm1_Shmt1(lgFC:0.12848FDR:0.98671)'
'm1_HMR_3847'	'm1_CoA[m1_m] + m1_L-2-amino-3-oxobutanoic acid[m1_m] <=> m1_acetyl-CoA[m1_m] + m1_glycine[m1_m]'	0	0	0	NaN	NaN	'm1_Glycine, serine and threonine metabolism'	''
'm1_HMR_3849'	'm1_H2O[m1_p] + m1_O2[m1_p] + m1_sarcosine[m1_p] => m1_formaldehyde[m1_p] + m1_glycine[m1_p] + m1_H2O2[m1_p]'	0	0	0	NaN	NaN	'm1_Glycine, serine and threonine metabolism'	'm1_Pipox(lgFC:-0.10391FDR:1) or m1_Sardh(lgFC:-0.13165FDR:0.97308)'
'm1_HMR_3852'	'm1_aminoacetone[m1_c] + m1_H2O[m1_c] + m1_O2[m1_c] => m1_H2O2[m1_c] + m1_methylglyoxal[m1_c] + m1_NH3[m1_c]'	0	0	0	NaN	NaN	'm1_Glycine, serine and threonine metabolism'	'm1_Aoc3(lgFC:-0.59812FDR:0.92597)'
'm1_HMR_3856'	'm1_H+[m1_c] + m1_methylglyoxal[m1_c] + m1_NADH[m1_c] => m1_D-lactaldehyde[m1_c] + m1_NAD+[m1_c]'	0	0	0	NaN	NaN	'm1_Glycine, serine and threonine metabolism'	'm1_Grhpr(lgFC:0.020029FDR:1)'
'm1_HMR_3860'	'm1_L-2-amino-3-oxobutanoic acid[m1_m] => m1_aminoacetone[m1_m] + m1_CO2[m1_m]'	0	0	0	NaN	NaN	'm1_Glycine, serine and threonine metabolism'	''
'm1_HMR_3883'	'm1_serine[m1_c] => m1_NH3[m1_c] + m1_pyruvate[m1_c]'	0	0	0	NaN	NaN	'm1_Glycine, serine and threonine metabolism'	'm1_Sds(lgFC:-0.31696FDR:0.94923) or m1_Sdsl(lgFC:0.71154FDR:0.3111) or m1_Srr(lgFC:-0.1676FDR:0.81499)'
'm1_HMR_3901'	'm1_glycine[m1_c] + m1_SAM[m1_c] => m1_SAH[m1_c] + m1_sarcosine[m1_c]'	0	0.000876341	0.000876341	1	NaN	'm1_Glycine, serine and threonine metabolism'	'm1_Gnmt(lgFC:0.10906FDR:1)'
'm1_HMR_3939'	'm1_glycine[m1_m] + m1_succinyl-CoA[m1_m] => m1_2-amino-3-oxoadipate[m1_m] + m1_CoA[m1_m]'	0	0	0	NaN	NaN	'm1_Glycine, serine and threonine metabolism'	'm1_Alas1(lgFC:0.50966FDR:0.66865) or m1_Alas2(lgFC:-0.8179FDR:0.4929)'
'm1_HMR_3974'	'm1_dehydroalanine[m1_c] + m1_H2O[m1_c] => m1_NH3[m1_c] + m1_pyruvate[m1_c]'	0	0	0	NaN	NaN	'm1_Glycine, serine and threonine metabolism'	'm1_Sds(lgFC:-0.31696FDR:0.94923) or m1_Sdsl(lgFC:0.71154FDR:0.3111) or m1_Srr(lgFC:-0.1676FDR:0.81499)'
'm1_HMR_4198'	'm1_pyruvate[m1_m] + m1_serine[m1_m] => m1_alanine[m1_m] + m1_hydroxypyruvate[m1_m]'	0	0	0	NaN	0	'm1_Glycine, serine and threonine metabolism'	'm1_Agxt(lgFC:-0.49299FDR:0.21814)'
'm1_HMR_4467'	'm1_pyruvate[m1_p] + m1_serine[m1_p] => m1_alanine[m1_p] + m1_hydroxypyruvate[m1_p]'	0	0	0	NaN	0	'm1_Glycine, serine and threonine metabolism'	'm1_Agxt(lgFC:-0.49299FDR:0.21814)'
'm1_HMR_4199'	'm1_H2O[m1_c] + m1_N-acetyl-L-alanine[m1_c] <=> m1_acetate[m1_c] + m1_alanine[m1_c]'	0	0	0	NaN	0	'm1_Glycine, serine and threonine metabolism'	'm1_Acy1(lgFC:-0.53202FDR:0.40886)'
'm1_HMR_4200'	'm1_serine[m1_c] => m1_dehydroalanine[m1_c] + m1_H2O[m1_c]'	0	0	0	NaN	NaN	'm1_Glycine, serine and threonine metabolism'	'm1_Sds(lgFC:-0.31696FDR:0.94923) or m1_Sdsl(lgFC:0.71154FDR:0.3111) or m1_Srr(lgFC:-0.1676FDR:0.81499)'
'm1_HMR_4284'	'm1_threonine[m1_c] => m1_acetaldehyde[m1_c] + m1_glycine[m1_c]'	0	0	0	NaN	NaN	'm1_Glycine, serine and threonine metabolism'	''
'm1_HMR_4348'	'm1_threonine[m1_c] => m1_2-oxobutyrate[m1_c] + m1_NH3[m1_c]'	0.0026698	0	0.0026698	1.2146	0.00324274	'm1_Glycine, serine and threonine metabolism'	'm1_Sds(lgFC:-0.31696FDR:0.94923) or m1_Sdsl(lgFC:0.71154FDR:0.3111)'
'm1_HMR_4466'	'm1_hydroxypyruvate[m1_c] => m1_2-hydroxy-3-oxopropanoate[m1_c]'	0	0	0	NaN	NaN	'm1_Glycine, serine and threonine metabolism'	''
'm1_HMR_4582'	'm1_arginine[m1_c] + m1_glycine[m1_c] <=> m1_guanidinoacetate[m1_c] + m1_ornithine[m1_c]'	-0.000908334	-0.000781249	0.00168958	NaN	-0.00077104	'm1_Glycine, serine and threonine metabolism'	'm1_Gatm(lgFC:-0.66764FDR:0.592)'
'm1_HMR_4584'	'm1_ATP[m1_c] + m1_creatine[m1_c] <=> m1_ADP[m1_c] + m1_creatine-phosphate[m1_c] + 2 m1_H+[m1_c]'	1	0	1	NaN	1.4851	'm1_Glycine, serine and threonine metabolism'	'm1_Ckb(lgFC:-0.48934FDR:0.62782) or m1_Ckm(lgFC:0.91318FDR:0.91724) or m1_Ckmt2(lgFC:2.0797FDR:0.53853)'
'm1_HMR_4696'	'm1_choline[m1_c] + m1_NAD+[m1_c] => m1_betaine_aldehyde[m1_c] + m1_H+[m1_c] + m1_NADH[m1_c]'	0	0.000102454	0.000102454	1	NaN	'm1_Glycine, serine and threonine metabolism'	'm1_Chdh(lgFC:-0.076485FDR:1)'
'm1_HMR_4697'	'm1_betaine_aldehyde[m1_c] + m1_H2O[m1_c] + m1_NAD+[m1_c] => m1_betaine[m1_c] + 2 m1_H+[m1_c] + m1_NADH[m1_c]'	0	0.000102454	0.000102454	0.964475	NaN	'm1_Glycine, serine and threonine metabolism'	'm1_Aldh7a1(lgFC:-0.19043FDR:0.71271)'
'm1_HMR_4699'	'm1_betaine[m1_c] + m1_homocysteine[m1_c] => m1_dimethylglycine[m1_c] + m1_methionine[m1_c]'	1	0.000102454	1.0001	1.5678	1.5678	'm1_Glycine, serine and threonine metabolism'	'm1_Bhmt(lgFC:1.3958FDR:0.49904) or m1_Bhmt2(lgFC:0.4928FDR:0.21814)'
'm1_HMR_4700'	'm1_dimethylglycine[m1_c] + m1_H2O[m1_c] + m1_NAD+[m1_c] => m1_formaldehyde[m1_c] + m1_H+[m1_c] + m1_NADH[m1_c] + m1_sarcosine[m1_c]'	0	0.000102454	0.000102454	1.12836	NaN	'm1_Glycine, serine and threonine metabolism'	'm1_Dmgdh(lgFC:0.58722FDR:0.74449)'
'm1_HMR_4742'	'm1_glycine[m1_m] + m1_succinyl-CoA[m1_m] => m1_5-aminolevulinate[m1_m] + m1_CO2[m1_m] + m1_CoA[m1_m]'	0	0	0	NaN	NaN	'm1_Glycine, serine and threonine metabolism'	'm1_Alas1(lgFC:0.50966FDR:0.66865) or m1_Alas2(lgFC:-0.8179FDR:0.4929)'
'm1_HMR_4788'	'm1_alanine[m1_m] + m1_glyoxalate[m1_m] => m1_glycine[m1_m] + m1_pyruvate[m1_m]'	0	0	0	NaN	NaN	'm1_Glycine, serine and threonine metabolism'	'm1_Agxt(lgFC:-0.49299FDR:0.21814) or m1_Agxt2(lgFC:0.18349FDR:0.95006)'
'm1_HMR_4789'	'm1_glycine[m1_p] + m1_H2O[m1_p] + m1_O2[m1_p] => m1_glyoxalate[m1_p] + m1_H2O2[m1_p] + m1_NH3[m1_p]'	0	0	0	NaN	NaN	'm1_Glycine, serine and threonine metabolism'	''
'm1_HMR_4791'	'm1_alanine[m1_p] + m1_glyoxalate[m1_p] => m1_glycine[m1_p] + m1_pyruvate[m1_p]'	0	0	0	NaN	0	'm1_Glycine, serine and threonine metabolism'	'm1_Agxt(lgFC:-0.49299FDR:0.21814)'
'm1_HMR_4792'	'm1_5,10-methylene-THF[m1_m] + m1_glycine[m1_m] + m1_H2O[m1_m] <=> m1_serine[m1_m] + m1_THF[m1_m]'	0	-0.0112373	0.0112373	NaN	NaN	'm1_Glycine, serine and threonine metabolism'	'm1_Shmt2(lgFC:-0.20703FDR:0.82017)'
'm1_HMR_5392'	'5 m1_ATP[m1_c] + 5 m1_glutamate[m1_c] + m1_THF[m1_c] => 5 m1_ADP[m1_c] + 5 m1_Pi[m1_c] + m1_THF-hexaglutamate[m1_c]'	0	0	0	NaN	NaN	'm1_Glycine, serine and threonine metabolism'	'm1_Fpgs(lgFC:0.46087FDR:0.62744)'
'm1_HMR_5393'	'5 m1_H2O[m1_c] + m1_THF-hexaglutamate[m1_c] => 5 m1_glutamate[m1_c] + m1_THF[m1_c]'	0	0	0	NaN	NaN	'm1_Glycine, serine and threonine metabolism'	'm1_Ggh(lgFC:-0.094818FDR:0.99109)'
'm1_HMR_6409'	'm1_dihydrolipoamide[m1_m] + m1_NAD+[m1_m] => m1_H+[m1_m] + m1_lipoamide[m1_m] + m1_NADH[m1_m]'	0	0.126222	0.126222	NaN	NaN	'm1_Glycine, serine and threonine metabolism'	'm1_Amt(lgFC:0.18369FDR:0.98278) or m1_Dld(lgFC:0.17181FDR:0.86538) or m1_Gcsh(lgFC:-0.23328FDR:0.55257) or m1_Gldc(lgFC:0.54509FDR:0.45546)'
'm1_HMR_7702'	'm1_glyoxalate[m1_c] + m1_H+[m1_c] + m1_NADPH[m1_c] => m1_glycolate[m1_c] + m1_NADP+[m1_c]'	0	0	0	NaN	NaN	'm1_Glycine, serine and threonine metabolism'	'm1_Grhpr(lgFC:0.020029FDR:1)'
'm1_HMR_7703'	'm1_glycolate[m1_c] + m1_O2[m1_c] => m1_glyoxalate[m1_c] + m1_H2O2[m1_c]'	0	0	0	NaN	NaN	'm1_Glycine, serine and threonine metabolism'	'm1_Hao1(lgFC:0.087952FDR:0.96032)'
'm1_HMR_8433'	'm1_glycine[m1_m] + m1_lipoamide[m1_m] => m1_CO2[m1_m] + m1_S-aminomethyldihydrolipoamide[m1_m]'	0	0	0	NaN	NaN	'm1_Glycine, serine and threonine metabolism'	'm1_Amt(lgFC:0.18369FDR:0.98278) or m1_Dld(lgFC:0.17181FDR:0.86538) or m1_Gcsh(lgFC:-0.23328FDR:0.55257) or m1_Gldc(lgFC:0.54509FDR:0.45546)'
'm1_HMR_8434'	'm1_S-aminomethyldihydrolipoamide[m1_m] + m1_THF[m1_m] => m1_5,10-methylene-THF[m1_m] + m1_dihydrolipoamide[m1_m] + m1_NH3[m1_m]'	0	0	0	NaN	NaN	'm1_Glycine, serine and threonine metabolism'	'm1_Amt(lgFC:0.18369FDR:0.98278) or m1_Dld(lgFC:0.17181FDR:0.86538) or m1_Gcsh(lgFC:-0.23328FDR:0.55257) or m1_Gldc(lgFC:0.54509FDR:0.45546)'
'm1_HMR_8435'	'm1_glycine[m1_m] + m1_lipoylprotein[m1_m] => m1_CO2[m1_m] + m1_S-aminomethyldihydrolipoylprotein[m1_m]'	0	0	0	NaN	NaN	'm1_Glycine, serine and threonine metabolism'	'm1_Amt(lgFC:0.18369FDR:0.98278) or m1_Dld(lgFC:0.17181FDR:0.86538) or m1_Gcsh(lgFC:-0.23328FDR:0.55257) or m1_Gldc(lgFC:0.54509FDR:0.45546)'
'm1_HMR_8436'	'm1_S-aminomethyldihydrolipoylprotein[m1_m] + m1_THF[m1_m] => m1_5,10-methylene-THF[m1_m] + m1_dihydrolipoylprotein[m1_m] + m1_NH3[m1_m]'	0	0	0	NaN	NaN	'm1_Glycine, serine and threonine metabolism'	'm1_Amt(lgFC:0.18369FDR:0.98278) or m1_Dld(lgFC:0.17181FDR:0.86538) or m1_Gcsh(lgFC:-0.23328FDR:0.55257) or m1_Gldc(lgFC:0.54509FDR:0.45546)'
'm1_HMR_8437'	'm1_dihydrolipoylprotein[m1_m] + m1_NAD+[m1_m] => m1_H+[m1_m] + m1_lipoylprotein[m1_m] + m1_NADH[m1_m]'	0	0	0	NaN	NaN	'm1_Glycine, serine and threonine metabolism'	'm1_Amt(lgFC:0.18369FDR:0.98278) or m1_Dld(lgFC:0.17181FDR:0.86538) or m1_Gcsh(lgFC:-0.23328FDR:0.55257) or m1_Gldc(lgFC:0.54509FDR:0.45546)'
'm1_HMR_8439'	'm1_dimethylglycine[m1_m] + m1_FAD[m1_m] + m1_H2O[m1_m] => m1_FADH2[m1_m] + m1_formaldehyde[m1_m] + m1_sarcosine[m1_m]'	0	0	0	NaN	NaN	'm1_Glycine, serine and threonine metabolism'	'm1_Dmgdh(lgFC:0.58722FDR:0.74449)'
'm1_HMR_8440'	'm1_betaine_aldehyde[m1_m] + m1_H2O[m1_m] + m1_NAD+[m1_m] => m1_betaine[m1_m] + 2 m1_H+[m1_m] + m1_NADH[m1_m]'	0	0	0	NaN	NaN	'm1_Glycine, serine and threonine metabolism'	'm1_Aldh7a1(lgFC:-0.19043FDR:0.71271)'
'm1_HMR_8441'	'm1_choline[m1_m] + m1_FAD[m1_m] => m1_betaine_aldehyde[m1_m] + m1_FADH2[m1_m]'	0	0	0	NaN	NaN	'm1_Glycine, serine and threonine metabolism'	'm1_Chdh(lgFC:-0.076485FDR:1)'
'm1_HMR_8442'	'm1_2-oxobutyrate[m1_c] + m1_CoA[m1_c] + m1_NAD+[m1_c] => m1_CO2[m1_c] + m1_H+[m1_c] + m1_NADH[m1_c] + m1_propanoyl-CoA[m1_c]'	0	0	0	NaN	NaN	'm1_Glycine, serine and threonine metabolism'	''
'm1_HMR_9718'	'm1_ATP[m1_c] + m1_homoserine[m1_c] => m1_ADP[m1_c] + m1_O-phospho-L-homoserine[m1_c]'	0	0	0	NaN	NaN	'm1_Glycine, serine and threonine metabolism'	''
'm1_HMR_9486'	'm1_H2O[m1_c] + m1_O-phospho-L-homoserine[m1_c] => m1_Pi[m1_c] + m1_threonine[m1_c]'	0	0	0	NaN	NaN	'm1_Glycine, serine and threonine metabolism'	''
'm1_HMR_4426'	'm1_acetylcarnosine[m1_c] + m1_CoA[m1_c] <=> m1_acetyl-CoA[m1_c] + m1_carnosine[m1_c]'	0	0	0	NaN	NaN	'm1_Histidine metabolism'	'm1_Naa10(lgFC:-0.14473FDR:0.8027) or m1_Naa15(lgFC:0.16229FDR:0.52638) or m1_Naa60(lgFC:-0.53338FDR:0.93864)'
'm1_HMR_4428'	'm1_histidine[m1_c] => m1_CO2[m1_c] + m1_histamine[m1_c]'	1	0	1	NaN	1.42223	'm1_Histidine metabolism'	'm1_Ddc(lgFC:0.3309FDR:0.90719) or m1_Hdc(lgFC:1.188FDR:0.35814)'
'm1_HMR_4429'	'm1_histamine[m1_c] + m1_SAM[m1_c] => m1_N-methylhistamine[m1_c] + m1_SAH[m1_c]'	0	0	0	NaN	NaN	'm1_Histidine metabolism'	'm1_Hnmt(lgFC:0.030198FDR:1)'
'm1_HMR_4430'	'm1_H2O[m1_c] + m1_N-methylhistamine[m1_c] + m1_O2[m1_c] => m1_H2O2[m1_c] + m1_methylimidazole-acetaldehyde[m1_c] + m1_NH3[m1_c]'	0	0	0	NaN	NaN	'm1_Histidine metabolism'	'm1_Aoc2(lgFC:0.73402FDR:0.61336) or m1_Aoc3(lgFC:-0.59812FDR:0.92597) or m1_Maoa(lgFC:-0.0064235FDR:1) or m1_Maob(lgFC:-0.2131FDR:0.84186)'
'm1_HMR_4431'	'm1_H2O[m1_c] + m1_methylimidazole-acetaldehyde[m1_c] + m1_NAD+[m1_c] => m1_H+[m1_c] + m1_methylimidazoleacetic acid[m1_c] + m1_NADH[m1_c]'	1	0	1	NaN	1.20652	'm1_Histidine metabolism'	'm1_Aldh1a3(lgFC:1.087FDR:0.44812) or m1_Aldh3b1(lgFC:-0.15805FDR:0.99096)'
'm1_HMR_4437'	'm1_histidine[m1_c] => m1_NH3[m1_c] + m1_urocanate[m1_c]'	0.00131543	8.73857e-13	0.00131543	1	0.00131543	'm1_Histidine metabolism'	'm1_Hal(lgFC:0.1246FDR:1)'
'm1_HMR_4658'	'm1_5-formiminotetrahydrofolate[m1_c] + m1_glutamate[m1_c] <=> m1_N-formimino-L-glutamate[m1_c] + m1_THF[m1_c]'	-0.00131543	-8.73857e-13	0.00131543	1	-0.00131543	'm1_Histidine metabolism'	'm1_Ftcd(lgFC:-0.050965FDR:1)'
'm1_HMR_4660'	'm1_4-imidazolone-5-propanoate[m1_c] + m1_H2O[m1_c] => m1_N-formimino-L-glutamate[m1_c]'	0.00131543	8.73857e-13	0.00131543	0.959859	0.00126263	'm1_Histidine metabolism'	'm1_Amdhd1(lgFC:-0.27361FDR:0.76764)'
'm1_HMR_4712'	'm1_H2O[m1_c] + m1_urocanate[m1_c] => m1_4-imidazolone-5-propanoate[m1_c]'	0.00131543	8.73857e-13	0.00131543	0.99945	0.00131471	'm1_Histidine metabolism'	'm1_Uroc1(lgFC:-0.20365FDR:0.99582)'
'm1_HMR_5337'	'm1_GSH[m1_c] + m1_urocanate[m1_c] => m1_S-[2-carboxy-1-(1H-imidazol-4-yl)ethyl]glutathione[m1_c]'	0	0	0	NaN	NaN	'm1_Histidine metabolism'	'm1_Cox10(lgFC:-0.0814FDR:0.98278) or m1_Dhdds(lgFC:-0.26171FDR:0.72314) or m1_Trmt12(lgFC:0.38389FDR:0.42209)'
'm1_HMR_5336'	'2 m1_H+[m1_c] + m1_H2O[m1_c] + m1_S-[2-carboxy-1-(1H-imidazol-4-yl)ethyl]glutathione[m1_c] => m1_glutamate[m1_c] + m1_glycine[m1_c] + m1_S-[2-carboxy-1-(1H-imidazol-4-yl)ethyl]-L-cysteine[m1_c]'	0	0	0	NaN	NaN	'm1_Histidine metabolism'	'm1_Acy3(lgFC:-0.29954FDR:0.63569) or m1_Macrod1(lgFC:-0.3913FDR:0.56151) or m1_Naaa(lgFC:-0.13065FDR:0.99096) or m1_Oard1(lgFC:-0.16948FDR:0.75533) or m1_Sirt1(lgFC:0.35027FDR:0.91533) or m1_Sirt2(lgFC:0.084521FDR:0.7822) or m1_Sirt3(lgFC:-0.21228FDR:0.70019) or m1_Sirt5(lgFC:0.30655FDR:0.39403) or m1_Wdyhv1(lgFC:-0.27016FDR:0.66006)'
'm1_HMR_5338'	'm1_acetyl-CoA[m1_c] + m1_S-[2-carboxy-1-(1H-imidazol-4-yl)ethyl]-L-cysteine[m1_c] => m1_CoA[m1_c] + m1_N-acetyl-S-[2-carboxy-1-(1-h-imidazol-4-yl)ethyl]-L-cysteine[m1_c]'	0	0	0	NaN	NaN	'm1_Histidine metabolism'	'm1_Elovl1(lgFC:-0.019495FDR:1) or m1_Elovl2(lgFC:-0.24874FDR:1) or m1_Elovl3(lgFC:0.03881FDR:1) or m1_Elovl5(lgFC:0.21665FDR:0.80405) or m1_Elovl6(lgFC:-0.12175FDR:1) or m1_Elovl7(lgFC:0.00021996FDR:1)'
'm1_HMR_5339'	'm1_H2O[m1_c] + m1_N-acetyl-S-[2-carboxy-1-(1-h-imidazol-4-yl)ethyl]-L-cysteine[m1_c] => m1_acetate[m1_c] + m1_S-[2-carboxy-1-(1H-imidazol-4-yl)ethyl]-L-cysteine[m1_c]'	0	0	0	NaN	NaN	'm1_Histidine metabolism'	'm1_Acy3(lgFC:-0.29954FDR:0.63569) or m1_Macrod1(lgFC:-0.3913FDR:0.56151) or m1_Naaa(lgFC:-0.13065FDR:0.99096) or m1_Oard1(lgFC:-0.16948FDR:0.75533) or m1_Sirt1(lgFC:0.35027FDR:0.91533) or m1_Sirt2(lgFC:0.084521FDR:0.7822) or m1_Sirt3(lgFC:-0.21228FDR:0.70019) or m1_Sirt5(lgFC:0.30655FDR:0.39403) or m1_Wdyhv1(lgFC:-0.27016FDR:0.66006)'
'm1_HMR_5340'	'm1_H+[m1_c] + m1_H2O[m1_c] + m1_S-[2-carboxy-1-(1H-imidazol-4-yl)ethyl]-L-cysteine[m1_c] => m1_NH4+[m1_c] + m1_S-[2-carboxy-1-(1H-imidazol-4-yl)ethyl]-3-thiolactate[m1_c]'	0	0	0	NaN	NaN	'm1_Histidine metabolism'	'm1_Acy3(lgFC:-0.29954FDR:0.63569) or m1_Macrod1(lgFC:-0.3913FDR:0.56151) or m1_Naaa(lgFC:-0.13065FDR:0.99096) or m1_Oard1(lgFC:-0.16948FDR:0.75533) or m1_Sirt1(lgFC:0.35027FDR:0.91533) or m1_Sirt2(lgFC:0.084521FDR:0.7822) or m1_Sirt3(lgFC:-0.21228FDR:0.70019) or m1_Sirt5(lgFC:0.30655FDR:0.39403) or m1_Wdyhv1(lgFC:-0.27016FDR:0.66006)'
'm1_HMR_8783'	'm1_H2O[m1_c] + m1_histamine[m1_c] + m1_O2[m1_c] => m1_H2O2[m1_c] + m1_imidazole-4-acetaldehyde[m1_c] + m1_NH3[m1_c]'	0	0	0	NaN	NaN	'm1_Histidine metabolism'	'm1_Aoc2(lgFC:0.73402FDR:0.61336) or m1_Aoc3(lgFC:-0.59812FDR:0.92597)'
'm1_HMR_8784'	'm1_H2O[m1_c] + m1_imidazole-4-acetaldehyde[m1_c] + m1_NAD+[m1_c] => m1_H+[m1_c] + m1_imidazole-4-acetate[m1_c] + m1_NADH[m1_c]'	0	0	0	NaN	NaN	'm1_Histidine metabolism'	'm1_Aldh1b1(lgFC:-0.28921FDR:0.73037) or m1_Aldh2(lgFC:-0.029657FDR:1) or m1_Aldh3a2(lgFC:-0.10108FDR:1) or m1_Aldh7a1(lgFC:-0.19043FDR:0.71271) or m1_Aldh9a1(lgFC:0.08386FDR:0.98923)'
'm1_HMR_8786'	'm1_H2O[m1_m] + m1_imidazole-4-acetaldehyde[m1_m] + m1_NAD+[m1_m] => m1_H+[m1_m] + m1_imidazole-4-acetate[m1_m] + m1_NADH[m1_m]'	0	0	0	NaN	NaN	'm1_Histidine metabolism'	'm1_Aldh1b1(lgFC:-0.28921FDR:0.73037) or m1_Aldh2(lgFC:-0.029657FDR:1) or m1_Aldh7a1(lgFC:-0.19043FDR:0.71271)'
'm1_HMR_4239'	'm1_2-oxoadipate[m1_m] + m1_CoA[m1_m] + m1_NAD+[m1_m] => m1_CO2[m1_m] + m1_glutaryl-CoA[m1_m] + m1_H+[m1_m] + m1_NADH[m1_m]'	0.00586622	0	0.00586622	1.0294	0.00603872	'm1_Lysine metabolism'	'm1_Dhtkd1(lgFC:0.30996FDR:0.68671) or m1_Dld(lgFC:0.17181FDR:0.86538) or m1_Dlst(lgFC:0.088818FDR:0.99096) or m1_Ogdh(lgFC:0.05342FDR:0.9961) or m1_Ogdhl(lgFC:0.70021FDR:0.9051) or m1_Pdhx(lgFC:0.19811FDR:0.83486)'
'm1_HMR_4241'	'm1_histone-N6-methyl-L-lysine[m1_n] + m1_SAH[m1_n] <=> m1_histone-L-lysine[m1_n] + m1_SAM[m1_n]'	0	0	0	NaN	NaN	'm1_Lysine metabolism'	'm1_Dot1l(lgFC:0.45975FDR:0.33578) or m1_Ezh1(lgFC:-0.11049FDR:0.92717) or m1_Kmt2a(lgFC:-0.12302FDR:0.93595) or m1_Kmt2e(lgFC:0.11609FDR:0.9051) or m1_Setd1a(lgFC:0.13469FDR:0.85144) or m1_Setd1b(lgFC:-0.33949FDR:0.39426) or m1_Setdb2(lgFC:-1.3533FDR:0.23876) or m1_Smyd3(lgFC:0.55151FDR:0.56743) or m1_Suv39h2(lgFC:0.45998FDR:0.91841)'
'm1_HMR_4288'	'm1_AKG[m1_m] + m1_H+[m1_m] + m1_lysine[m1_m] + m1_NADPH[m1_m] => m1_H2O[m1_m] + m1_NADP+[m1_m] + m1_saccharopine[m1_m]'	0.00479549	0	0.00479549	1	0.00479549	'm1_Lysine metabolism'	'm1_Aass(lgFC:0.16802FDR:1)'
'm1_HMR_4597'	'm1_2-oxoadipate[m1_m] + m1_glutamate[m1_m] <=> m1_AKG[m1_m] + m1_L-2-aminoadipate[m1_m]'	-0.00479549	0	0.00479549	1.09197	-0.00523654	'm1_Lysine metabolism'	'm1_Aadat(lgFC:0.42555FDR:0.73193)'
'm1_HMR_4599'	'm1_2-oxoadipate[m1_m] + m1_lipoamide[m1_m] => m1_CO2[m1_m] + m1_S-glutaryldihydrolipoamide[m1_m]'	0	0	0	NaN	NaN	'm1_Lysine metabolism'	'm1_Dhtkd1(lgFC:0.30996FDR:0.68671) or m1_Ogdh(lgFC:0.05342FDR:0.9961) or m1_Ogdhl(lgFC:0.70021FDR:0.9051)'
'm1_HMR_4667'	'm1_H2O[m1_m] + m1_NAD+[m1_m] + m1_saccharopine[m1_m] => m1_2-aminoadipate 6-semialdehyde[m1_m] + m1_glutamate[m1_m] + m1_H+[m1_m] + m1_NADH[m1_m]'	0.00479549	0	0.00479549	1.00044	0.00479762	'm1_Lysine metabolism'	'm1_Aass(lgFC:0.16802FDR:1) or m1_Sccpdh(lgFC:0.13513FDR:0.99096)'
'm1_HMR_4737'	'm1_2-aminoadipate 6-semialdehyde[m1_c] + m1_H2O[m1_c] + m1_NAD+[m1_c] => m1_H+[m1_c] + m1_L-2-aminoadipate[m1_c] + m1_NADH[m1_c]'	0	0	0	NaN	NaN	'm1_Lysine metabolism'	'm1_Aldh7a1(lgFC:-0.19043FDR:0.71271)'
'm1_HMR_4739'	'm1_2-aminoadipate 6-semialdehyde[m1_m] + m1_H2O[m1_m] + m1_NAD+[m1_m] => m1_H+[m1_m] + m1_L-2-aminoadipate[m1_m] + m1_NADH[m1_m]'	0.00479549	0	0.00479549	0.964475	0.00462513	'm1_Lysine metabolism'	'm1_Aldh7a1(lgFC:-0.19043FDR:0.71271)'
'm1_HMR_4740'	'm1_1-piperideine-6-carboxylate[m1_c] + m1_H2O[m1_c] <=> m1_2-aminoadipate 6-semialdehyde[m1_c]'	0	0	0	NaN	NaN	'm1_Lysine metabolism'	'm1_Moxd1(lgFC:-0.83635FDR:0.81576)'
'm1_HMR_6415'	'm1_CoA[m1_m] + m1_S-glutaryldihydrolipoamide[m1_m] => m1_dihydrolipoamide[m1_m] + m1_glutaryl-CoA[m1_m]'	0	0	0	NaN	NaN	'm1_Lysine metabolism'	'm1_Dlst(lgFC:0.088818FDR:0.99096)'
'm1_HMR_6974'	'm1_lysine[m1_c] => m1_[protein]-L-lysine[m1_c] + m1_H2O[m1_c]'	0	0	0	NaN	NaN	'm1_Lysine metabolism'	''
'm1_HMR_6975'	'm1_[protein]-L-lysine[m1_c] + m1_SAM[m1_c] => m1_[protein]-N6-methyl-L-lysine[m1_c] + m1_SAH[m1_c]'	0	0	0	NaN	NaN	'm1_Lysine metabolism'	'm1_Dot1l(lgFC:0.45975FDR:0.33578) or m1_Kmt2a(lgFC:-0.12302FDR:0.93595) or m1_Kmt2e(lgFC:0.11609FDR:0.9051) or m1_Setd1a(lgFC:0.13469FDR:0.85144) or m1_Setd1b(lgFC:-0.33949FDR:0.39426) or m1_Setdb2(lgFC:-1.3533FDR:0.23876) or m1_Smyd3(lgFC:0.55151FDR:0.56743) or m1_Suv39h2(lgFC:0.45998FDR:0.91841)'
'm1_HMR_6976'	'm1_[protein]-N6-methyl-L-lysine[m1_c] + m1_SAM[m1_c] => m1_[protein]-N6,N6-dimethyl-L-lysine[m1_c] + m1_SAH[m1_c]'	0	0	0	NaN	NaN	'm1_Lysine metabolism'	'm1_Dot1l(lgFC:0.45975FDR:0.33578) or m1_Kmt2a(lgFC:-0.12302FDR:0.93595) or m1_Kmt2e(lgFC:0.11609FDR:0.9051) or m1_Setd1a(lgFC:0.13469FDR:0.85144) or m1_Setd1b(lgFC:-0.33949FDR:0.39426) or m1_Setdb2(lgFC:-1.3533FDR:0.23876) or m1_Smyd3(lgFC:0.55151FDR:0.56743) or m1_Suv39h2(lgFC:0.45998FDR:0.91841)'
'm1_HMR_6977'	'm1_[protein]-N6,N6-dimethyl-L-lysine[m1_c] + m1_H+[m1_c] + m1_SAM[m1_c] => m1_[protein]-N6,N6,N6-trimethyl-L-lysine[m1_c] + m1_SAH[m1_c]'	0	0	0	NaN	NaN	'm1_Lysine metabolism'	'm1_Dot1l(lgFC:0.45975FDR:0.33578) or m1_Kmt2a(lgFC:-0.12302FDR:0.93595) or m1_Kmt2e(lgFC:0.11609FDR:0.9051) or m1_Setd1a(lgFC:0.13469FDR:0.85144) or m1_Setd1b(lgFC:-0.33949FDR:0.39426) or m1_Setdb2(lgFC:-1.3533FDR:0.23876) or m1_Smyd3(lgFC:0.55151FDR:0.56743) or m1_Suv39h2(lgFC:0.45998FDR:0.91841)'
'm1_HMR_6978'	'm1_[protein]-N6,N6,N6-trimethyl-L-lysine[m1_c] + m1_H2O[m1_c] => 2 m1_H+[m1_c] + m1_N6,N6,N6-trimethyl-L-lysine[m1_c]'	0	0	0	NaN	NaN	'm1_Lysine metabolism'	'm1_Spcs1(lgFC:-0.13434FDR:0.67714) or m1_Spcs2(lgFC:0.30565FDR:0.64616) or m1_Spcs3(lgFC:0.096047FDR:0.99256)'
'm1_HMR_6979'	'm1_AKG[m1_c] + m1_N6,N6,N6-trimethyl-L-lysine[m1_c] + m1_O2[m1_c] => m1_3-hydroxy-N6,N6,N6-trimethyl-L-lysine[m1_c] + m1_CO2[m1_c] + m1_succinate[m1_c]'	0	0	0	NaN	NaN	'm1_Lysine metabolism'	''
'm1_HMR_6980'	'm1_3-hydroxy-N6,N6,N6-trimethyl-L-lysine[m1_c] + m1_H+[m1_c] => m1_4-trimethylammoniobutanal[m1_c] + m1_glycine[m1_c]'	0	0	0	NaN	NaN	'm1_Lysine metabolism'	'm1_Shmt2(lgFC:-0.20703FDR:0.82017)'
'm1_HMR_6981'	'm1_4-trimethylammoniobutanal[m1_c] + m1_H2O[m1_c] + m1_NAD+[m1_c] => m1_gamma-butyrobetaine[m1_c] + 2 m1_H+[m1_c] + m1_NADH[m1_c]'	0	0	0	NaN	NaN	'm1_Lysine metabolism'	'm1_Aldh9a1(lgFC:0.08386FDR:0.98923)'
'm1_HMR_6982'	'm1_AKG[m1_c] + m1_gamma-butyrobetaine[m1_c] + m1_O2[m1_c] => m1_CO2[m1_c] + m1_L-carnitine[m1_c] + m1_succinate[m1_c]'	0	0	0	NaN	NaN	'm1_Lysine metabolism'	'm1_Bbox1(lgFC:0.056999FDR:1)'
'm1_HMR_6983'	'm1_[protein]-L-lysine[m1_c] + m1_AKG[m1_c] + 2 m1_H+[m1_c] + m1_O2[m1_c] => m1_CO2[m1_c] + m1_H2O[m1_c] + m1_procollagen-5-hydroxy-L-lysine[m1_c] + m1_succinate[m1_c]'	0	0	0	NaN	NaN	'm1_Lysine metabolism'	'm1_Cercam(lgFC:1.274FDR:0.56818) or m1_Plod2(lgFC:-0.5221FDR:0.82854) or m1_Plod3(lgFC:-0.25237FDR:0.78747)'
'm1_HMR_6984'	'm1_procollagen-5-hydroxy-L-lysine[m1_c] + m1_UDP-galactose[m1_c] => m1_5-(D-galactosyloxy)-L-lysine-procollagen[m1_c] + m1_UDP[m1_c]'	0	0	0	NaN	0	'm1_Lysine metabolism'	'm1_Colgalt2(lgFC:-2.0928FDR:0.00099306) or m1_Plod3(lgFC:-0.25237FDR:0.78747)'
'm1_HMR_6985'	'm1_5-(D-galactosyloxy)-L-lysine-procollagen[m1_c] + m1_UDP-glucose[m1_c] => m1_1,2-D-glucosyl-5-D-(galactosyloxy)-L-lysine-procollagen[m1_c] + m1_UDP[m1_c]'	0	0	0	NaN	NaN	'm1_Lysine metabolism'	'm1_Plod3(lgFC:-0.25237FDR:0.78747)'
'm1_HMR_8017'	'm1_H2O[m1_p] + m1_lysine[m1_p] + m1_O2[m1_p] => m1_6-amino-2-oxohexanoate[m1_p] + m1_H2O2[m1_p] + m1_NH3[m1_p]'	0	0	0	NaN	NaN	'm1_Lysine metabolism'	''
'm1_HMR_8018'	'm1_6-amino-2-oxohexanoate[m1_p] => m1_delta1-piperideine-2-carboxylate[m1_p] + m1_H2O[m1_p]'	0	0	0	NaN	NaN	'm1_Lysine metabolism'	''
'm1_HMR_8019'	'm1_delta1-piperideine-2-carboxylate[m1_p] + m1_H+[m1_p] + m1_NADH[m1_p] => m1_L-pipecolate[m1_p] + m1_NAD+[m1_p]'	0	0	0	NaN	NaN	'm1_Lysine metabolism'	''
'm1_HMR_8021'	'm1_L-pipecolate[m1_p] + m1_O2[m1_p] => m1_1-piperideine-6-carboxylate[m1_p] + m1_H2O2[m1_p]'	0	0	0	NaN	NaN	'm1_Lysine metabolism'	'm1_Pipox(lgFC:-0.10391FDR:1)'
'm1_HMR_8025'	'm1_[protein]-L-lysine[m1_n] + m1_SAM[m1_n] => m1_histone-N6-methyl-L-lysine[m1_n] + m1_SAH[m1_n]'	0	0	0	NaN	NaN	'm1_Lysine metabolism'	'm1_Dot1l(lgFC:0.45975FDR:0.33578) or m1_Ezh1(lgFC:-0.11049FDR:0.92717) or m1_Kmt2a(lgFC:-0.12302FDR:0.93595) or m1_Kmt2e(lgFC:0.11609FDR:0.9051) or m1_Setd1a(lgFC:0.13469FDR:0.85144) or m1_Setd1b(lgFC:-0.33949FDR:0.39426) or m1_Setdb2(lgFC:-1.3533FDR:0.23876) or m1_Suv39h2(lgFC:0.45998FDR:0.91841)'
'm1_HMR_8026'	'm1_histone-N6-methyl-L-lysine[m1_n] + m1_SAM[m1_n] => m1_[protein]-N6,N6-dimethyl-L-lysine[m1_n] + m1_SAH[m1_n]'	0	0	0	NaN	NaN	'm1_Lysine metabolism'	'm1_Dot1l(lgFC:0.45975FDR:0.33578) or m1_Ezh1(lgFC:-0.11049FDR:0.92717) or m1_Kmt2a(lgFC:-0.12302FDR:0.93595) or m1_Kmt2e(lgFC:0.11609FDR:0.9051) or m1_Setd1a(lgFC:0.13469FDR:0.85144) or m1_Setd1b(lgFC:-0.33949FDR:0.39426) or m1_Setdb2(lgFC:-1.3533FDR:0.23876) or m1_Suv39h2(lgFC:0.45998FDR:0.91841)'
'm1_HMR_8027'	'm1_[protein]-N6,N6-dimethyl-L-lysine[m1_n] + m1_SAM[m1_n] => m1_[protein]-N6,N6,N6-trimethyl-L-lysine[m1_n] + m1_SAH[m1_n]'	0	0	0	NaN	NaN	'm1_Lysine metabolism'	'm1_Dot1l(lgFC:0.45975FDR:0.33578) or m1_Ezh1(lgFC:-0.11049FDR:0.92717) or m1_Kmt2a(lgFC:-0.12302FDR:0.93595) or m1_Kmt2e(lgFC:0.11609FDR:0.9051) or m1_Setd1a(lgFC:0.13469FDR:0.85144) or m1_Setd1b(lgFC:-0.33949FDR:0.39426) or m1_Setdb2(lgFC:-1.3533FDR:0.23876) or m1_Suv39h2(lgFC:0.45998FDR:0.91841)'
'm1_HMR_8029'	'm1_[protein]-N6,N6,N6-trimethyl-L-lysine[m1_r] + m1_H2O[m1_r] => m1_H+[m1_r] + m1_N6,N6,N6-trimethyl-L-lysine[m1_r] + m1_peptide sans lysine[m1_r]'	0	0	0	NaN	NaN	'm1_Lysine metabolism'	'm1_Spcs1(lgFC:-0.13434FDR:0.67714) or m1_Spcs2(lgFC:0.30565FDR:0.64616) or m1_Spcs3(lgFC:0.096047FDR:0.99256)'
'm1_HMR_9832'	'm1_ATP[m1_c] + m1_L-2-aminoadipate[m1_c] => m1_PPi[m1_c] + m1_L-2-aminoadipate-adenylate[m1_c]'	0	0	0	NaN	NaN	'm1_Lysine metabolism'	''
'm1_HMR_9833'	'm1_L-2-aminoadipate-adenylate[m1_c] + m1_holo-lys2[m1_c] => m1_AMP[m1_c] + m1_alpha-aminoadipoyl-S-acyl[m1_c]'	0	0	0	NaN	NaN	'm1_Lysine metabolism'	''
'm1_HMR_9834'	'm1_H+[m1_c] + m1_NADPH[m1_c] + m1_alpha-aminoadipoyl-S-acyl[m1_c] => m1_2-aminoadipate 6-semialdehyde[m1_c] + m1_NADP+[m1_c] + m1_holo-lys2[m1_c]'	0	0	0	NaN	NaN	'm1_Lysine metabolism'	''
'm1_HMR_3164'	'm1_crotonyl-CoA[m1_m] + m1_H2O[m1_m] => m1_(S)-3-hydroxybutyryl-CoA[m1_m]'	0.0136907	0.00934848	0.0230391	1.10307	0.0151018	'm1_Tryptophan metabolism'	'm1_Echs1(lgFC:0.052418FDR:1) or m1_Hadha(lgFC:0.41971FDR:0.3895)'
'm1_HMR_3166'	'm1_(S)-3-hydroxybutyryl-CoA[m1_m] + m1_NAD+[m1_m] => m1_acetoacetyl-CoA[m1_m] + m1_H+[m1_m] + m1_NADH[m1_m]'	0.0136907	0.00934848	0.0230391	1.24911	0.0171011	'm1_Tryptophan metabolism'	'm1_Hadh(lgFC:0.047722FDR:1) or m1_Hadha(lgFC:0.41971FDR:0.3895) or m1_Hsd17b10(lgFC:0.71774FDR:0.16044)'
'm1_HMR_3885'	'm1_acetoacetyl-CoA[m1_m] + m1_CoA[m1_m] <=> 2 m1_acetyl-CoA[m1_m]'	2.40219	2.13919	4.54138	1.71653	4.32051	'm1_Tryptophan metabolism'	'm1_Acat1(lgFC:0.79181FDR:0.020125)'
'm1_HMR_4250'	'm1_2-amino-3-carboxymuconate semialdehyde[m1_c] => m1_H2O[m1_c] + m1_quinolinate[m1_c]'	0	0	0	NaN	NaN	'm1_Tryptophan metabolism'	''
'm1_HMR_8091'	'm1_3-hydroxy-L-kynurenine[m1_c] => m1_3-hydroxykynurenamine[m1_c] + m1_CO2[m1_c]'	0	0	0	NaN	NaN	'm1_Tryptophan metabolism'	'm1_Ddc(lgFC:0.3309FDR:0.90719)'
'm1_HMR_8092'	'm1_3-hydroxykynurenamine[m1_c] + m1_O2[m1_c] => m1_4,8-dihydroxyquinoline[m1_c] + m1_H2O2[m1_c] + m1_NH3[m1_c]'	0	0	0	NaN	NaN	'm1_Tryptophan metabolism'	'm1_Maoa(lgFC:-0.0064235FDR:1) or m1_Maob(lgFC:-0.2131FDR:0.84186)'
'm1_HMR_8563'	'm1_H2O[m1_m] + m1_indole-3-acetaldehyde[m1_m] + m1_NAD+[m1_m] => m1_H+[m1_m] + m1_indoleacetate[m1_m] + m1_NADH[m1_m]'	0	0	0	NaN	NaN	'm1_Tryptophan metabolism'	'm1_Aldh1b1(lgFC:-0.28921FDR:0.73037) or m1_Aldh2(lgFC:-0.029657FDR:1) or m1_Aldh7a1(lgFC:-0.19043FDR:0.71271)'
'm1_HMR_8564'	'm1_AKG[m1_c] + m1_kynurenine[m1_c] => m1_4-(2-aminophenyl)-2,4-dioxobutanoate[m1_c] + m1_glutamate[m1_c]'	0	0	0	NaN	NaN	'm1_Tryptophan metabolism'	'm1_Aadat(lgFC:0.42555FDR:0.73193)'
'm1_HMR_8565'	'm1_4-(2-aminophenyl)-2,4-dioxobutanoate[m1_c] => m1_4-hydroxy-2-quinolinecarboxylic acid[m1_c] + m1_H2O[m1_c]'	0	0	0	NaN	NaN	'm1_Tryptophan metabolism'	''
'm1_HMR_8566'	'm1_H+[m1_c] + m1_melatonin[m1_c] + m1_NADPH[m1_c] + m1_O2[m1_c] => m1_6-hydroxymelatonin[m1_c] + m1_H2O[m1_c] + m1_NADP+[m1_c]'	0	0	0	NaN	0	'm1_Tryptophan metabolism'	'm1_Cyp1a1(lgFC:-1.1604FDR:0.74916) or m1_Cyp1a2(lgFC:-1.617FDR:0.39369) or m1_Cyp1b1(lgFC:-0.18097FDR:0.99256)'
'm1_HMR_3935'	'm1_formaldehyde[m1_c] + m1_GSH[m1_c] <=> m1_hydroxymethylglutathione[m1_c]'	1	0	1	NaN	1.20023	'm1_Tyrosine metabolism'	'm1_Hmgcl(lgFC:0.35216FDR:0.27576)'
'm1_HMR_4681'	'm1_phenylalanine[m1_c] => m1_CO2[m1_c] + m1_phenethylamine[m1_c]'	0	0	0	NaN	NaN	'm1_Tyrosine metabolism'	'm1_Ddc(lgFC:0.3309FDR:0.90719)'
'm1_HMR_4682'	'm1_H2O[m1_c] + m1_O2[m1_c] + m1_phenethylamine[m1_c] => m1_H2O2[m1_c] + m1_NH3[m1_c] + m1_phenylacetaldehyde[m1_c]'	0	0	0	NaN	NaN	'm1_Tyrosine metabolism'	'm1_Aoc2(lgFC:0.73402FDR:0.61336) or m1_Aoc3(lgFC:-0.59812FDR:0.92597) or m1_Maoa(lgFC:-0.0064235FDR:1) or m1_Maob(lgFC:-0.2131FDR:0.84186)'
'm1_HMR_4683'	'm1_H2O[m1_c] + m1_NAD+[m1_c] + m1_phenylacetaldehyde[m1_c] => m1_H+[m1_c] + m1_NADH[m1_c] + m1_phenylacetate[m1_c]'	1	0.655931	1.65593	NaN	1.20652	'm1_Tyrosine metabolism'	'm1_Aldh1a3(lgFC:1.087FDR:0.44812) or m1_Aldh3b1(lgFC:-0.15805FDR:0.99096)'
'm1_HMR_4685'	'm1_H2O[m1_m] + m1_NAD+[m1_m] + m1_phenylacetaldehyde[m1_m] => m1_H+[m1_m] + m1_NADH[m1_m] + m1_phenylacetate[m1_m]'	1	1.20652	2.20652	NaN	1.20652	'm1_Tyrosine metabolism'	'm1_Aldh1a3(lgFC:1.087FDR:0.44812) or m1_Aldh3b1(lgFC:-0.15805FDR:0.99096)'
'm1_HMR_4686'	'm1_H+[m1_c] + m1_NADPH[m1_c] + m1_phenylacetate[m1_c] => m1_H2O[m1_c] + m1_NADP+[m1_c] + m1_phenylacetaldehyde[m1_c]'	1	0.655931	1.65593	NaN	1.20652	'm1_Tyrosine metabolism'	'm1_Aldh1a3(lgFC:1.087FDR:0.44812) or m1_Aldh3b1(lgFC:-0.15805FDR:0.99096)'
'm1_HMR_4687'	'm1_H+[m1_m] + m1_NADPH[m1_m] + m1_phenylacetate[m1_m] => m1_H2O[m1_m] + m1_NADP+[m1_m] + m1_phenylacetaldehyde[m1_m]'	1	1.20652	2.20652	NaN	1.20652	'm1_Tyrosine metabolism'	'm1_Aldh1a3(lgFC:1.087FDR:0.44812) or m1_Aldh3b1(lgFC:-0.15805FDR:0.99096)'
'm1_HMR_4702'	'm1_homogentisate[m1_c] + m1_NADPH[m1_c] + m1_O2[m1_c] => m1_CO2[m1_c] + m1_gentisate aldehyde[m1_c] + m1_H+[m1_c] + m1_H2O[m1_c] + m1_NADP+[m1_c]'	0	0	0	NaN	NaN	'm1_Tyrosine metabolism'	''
'm1_HMR_4703'	'm1_gentisate aldehyde[m1_c] + m1_H2O[m1_c] + m1_NAD+[m1_c] => m1_2,5-dihydroxybenzoate[m1_c] + m1_H+[m1_c] + m1_NADH[m1_c]'	0	0	0	NaN	NaN	'm1_Tyrosine metabolism'	'm1_Aox1(lgFC:-0.44547FDR:0.61894)'
'm1_HMR_4704'	'm1_gentisate aldehyde[m1_c] + m1_H2O[m1_c] + m1_O2[m1_c] => m1_2,5-dihydroxybenzoate[m1_c] + m1_H2O2[m1_c]'	0	0	0	NaN	NaN	'm1_Tyrosine metabolism'	'm1_Aox1(lgFC:-0.44547FDR:0.61894)'
'm1_HMR_6988'	'2 m1_H+[m1_c] + m1_H2O2[m1_c] + 2 m1_iodide[m1_c] => 2 m1_H2O[m1_c] + m1_iodine[m1_c]'	0	0	0	NaN	NaN	'm1_Tyrosine metabolism'	''
'm1_HMR_7689'	'm1_dopamine[m1_c] + m1_PAPS[m1_c] => m1_dopamine-3-O-sulfate[m1_c] + m1_PAP[m1_c]'	0	0	0	NaN	NaN	'm1_Tyrosine metabolism'	''
'm1_HMR_8094'	'm1_noradrenaline[m1_c] + m1_PAPS[m1_c] => m1_norepinephrine sulfate[m1_c] + m1_PAP[m1_c]'	0	0	0	NaN	NaN	'm1_Tyrosine metabolism'	''
'm1_HMR_8529'	'm1_H2O[m1_c] + m1_methylamine[m1_c] + m1_O2[m1_c] => m1_formaldehyde[m1_c] + m1_H2O2[m1_c] + m1_NH3[m1_c]'	0	0	0	NaN	NaN	'm1_Tyrosine metabolism'	'm1_Aoc2(lgFC:0.73402FDR:0.61336) or m1_Aoc3(lgFC:-0.59812FDR:0.92597)'
'm1_HMR_8530'	'm1_formaldehyde[m1_c] + m1_GSH[m1_c] + m1_NAD+[m1_c] => m1_formylglutathione[m1_c] + m1_H+[m1_c] + m1_NADH[m1_c]'	0	0	0	NaN	NaN	'm1_Tyrosine metabolism'	'm1_Adh1(lgFC:-0.71411FDR:0.44374) or m1_Adh4(lgFC:-0.57187FDR:0.3751) or m1_Adh5(lgFC:-0.021378FDR:1) or m1_Adh7(lgFC:0.0061505FDR:1) or m1_Adhfe1(lgFC:0.17131FDR:0.97231)'
'm1_HMR_8533'	'2 m1_2-carboxy-2,3-dihydro-5,6-dihydroxyindole[m1_c] + m1_O2[m1_c] => 2 m1_H2O[m1_c] + 2 m1_L-dopachrome[m1_c]'	0	0	0	NaN	NaN	'm1_Tyrosine metabolism'	''
'm1_HMR_8534'	'm1_PAPS[m1_c] + m1_triiodothyronine[m1_c] => m1_3,5,3-triiodothyronine-4-sulfate[m1_c] + m1_PAP[m1_c]'	0	0	0	NaN	NaN	'm1_Tyrosine metabolism'	''
'm1_HMR_8535'	'm1_PAPS[m1_c] + m1_tyramine[m1_c] => m1_PAP[m1_c] + m1_tyramine-O-sulfate[m1_c]'	0	0	0	NaN	NaN	'm1_Tyrosine metabolism'	''
'm1_HMR_8537'	'm1_O2[m1_c] + m1_tetrahydrobiopterin[m1_c] + m1_tyrosine[m1_c] => m1_4alpha-hydroxytetrahydrobiopterin[m1_c] + m1_L-dopa[m1_c]'	0	0	0	NaN	NaN	'm1_Tyrosine metabolism'	''
'm1_HMR_8541'	'm1_O2[m1_c] + 2 m1_tyrosine[m1_c] => 2 m1_L-dopa[m1_c]'	0	0	0	NaN	NaN	'm1_Tyrosine metabolism'	''
'm1_HMR_8542'	'2 m1_L-dopa[m1_c] + m1_O2[m1_c] => 2 m1_H2O[m1_c] + 2 m1_L-dopaquinone[m1_c]'	0	0	0	NaN	NaN	'm1_Tyrosine metabolism'	''
'm1_HMR_8543'	'm1_3-iodo-L-tyrosine[m1_c] + m1_iodine[m1_c] => m1_3,5-diiodo-L-tyrosine[m1_c] + m1_H+[m1_c] + m1_iodide[m1_c]'	0	0	0	NaN	NaN	'm1_Tyrosine metabolism'	''
'm1_HMR_8544'	'm1_iodine[m1_c] + m1_tyrosine[m1_c] => m1_3-iodo-L-tyrosine[m1_c] + m1_H+[m1_c] + m1_iodide[m1_c]'	0	0	0	NaN	NaN	'm1_Tyrosine metabolism'	''
'm1_HMR_8630'	'2 m1_4-coumarate[m1_c] + m1_O2[m1_c] => 2 m1_caffeate[m1_c]'	0	0	0	NaN	NaN	'm1_Tyrosine metabolism'	''
'm1_HMR_8540'	'm1_5,6-dihydroxyindole-2-carboxylate[m1_c] + m1_O2[m1_c] + m1_indole-5,6-quinone[m1_c] => m1_H2O[m1_c] + m1_eumelanin[m1_c]'	0	0	0	NaN	NaN	'm1_Tyrosine metabolism'	''
'm1_HMR_9733'	'm1_L-dopachrome[m1_c] => m1_CO2[m1_c] + m1_5,6-dihydroxyindole[m1_c]'	0	0	0	NaN	NaN	'm1_Tyrosine metabolism'	''
'm1_HMR_9734'	'm1_O2[m1_c] + 2 m1_5,6-dihydroxyindole[m1_c] => 2 m1_H2O[m1_c] + 2 m1_indole-5,6-quinone[m1_c]'	0	0	0	NaN	NaN	'm1_Tyrosine metabolism'	''
'm1_HMR_3206'	'm1_2-methylacetoacetyl-CoA[m1_m] + m1_CoA[m1_m] => m1_acetyl-CoA[m1_m] + m1_propanoyl-CoA[m1_m]'	0.000142436	0	0.000142436	1.19519	0.000170238	'm1_Valine, leucine, and isoleucine metabolism'	'm1_Acaa2(lgFC:-0.018306FDR:1) or m1_Hadhb(lgFC:0.55657FDR:0.17074)'
'm1_HMR_3208'	'm1_ATP[m1_m] + m1_H+[m1_m] + m1_HCO3-[m1_m] + m1_propanoyl-CoA[m1_m] => m1_ADP[m1_m] + m1_methylmalonyl-CoA[m1_m] + m1_Pi[m1_m]'	0	0	0	1	NaN	'm1_Valine, leucine, and isoleucine metabolism'	'm1_Pcca(lgFC:-0.033206FDR:1) or m1_Pccb(lgFC:0.0030586FDR:1)'
'm1_HMR_3211'	'm1_propanoyl-CoA[m1_m] + m1_ubiquinone[m1_m] => m1_acrylyl-CoA[m1_m] + m1_ubiquinol[m1_m]'	0.296083	0.421014	0.717097	NaN	0.421014	'm1_Valine, leucine, and isoleucine metabolism'	'm1_Acadm(lgFC:0.62614FDR:0.22355)'
'm1_HMR_3213'	'm1_methylmalonyl-CoA[m1_m] => m1_(R)-methylmalonyl-CoA[m1_m]'	0	0	0	0.969439	NaN	'm1_Valine, leucine, and isoleucine metabolism'	'm1_Mcee(lgFC:-0.18813FDR:0.75003)'
'm1_HMR_3215'	'm1_(R)-methylmalonyl-CoA[m1_m] => m1_succinyl-CoA[m1_m]'	0.0032807	0	0.0032807	1	0.0032807	'm1_Valine, leucine, and isoleucine metabolism'	''
'm1_HMR_3747'	'm1_AKG[m1_c] + m1_valine[m1_c] <=> m1_3-methyl-2-oxobutyrate[m1_c] + m1_glutamate[m1_c]'	0.0032807	0	0.0032807	1	0.0032807	'm1_Valine, leucine, and isoleucine metabolism'	''
'm1_HMR_3744'	'm1_AKG[m1_m] + m1_valine[m1_m] <=> m1_3-methyl-2-oxobutyrate[m1_m] + m1_glutamate[m1_m]'	0	0	0	NaN	NaN	'm1_Valine, leucine, and isoleucine metabolism'	'm1_Bcat2(lgFC:0.1284FDR:0.99096)'
'm1_HMR_3757'	'm1_3-hydroxyisobutyrate[m1_m] + m1_NAD+[m1_m] => m1_2-methyl-3-oxopropanoate[m1_m] + m1_H+[m1_m] + m1_NADH[m1_m]'	0.0032807	0	0.0032807	1.14126	0.00374411	'm1_Valine, leucine, and isoleucine metabolism'	'm1_Hadh(lgFC:0.047722FDR:1) or m1_Hibadh(lgFC:-0.34931FDR:0.45398) or m1_Hsd17b10(lgFC:0.71774FDR:0.16044)'
'm1_HMR_3761'	'm1_2-methyl-3-oxopropanoate[m1_m] + m1_CoA[m1_m] + m1_NAD+[m1_m] => m1_(R)-methylmalonyl-CoA[m1_m] + m1_H+[m1_m] + m1_NADH[m1_m]'	0.0032807	0	0.0032807	1.00023	0.00328144	'm1_Valine, leucine, and isoleucine metabolism'	'm1_Aldh6a1(lgFC:0.07587FDR:0.99582)'
'm1_HMR_3777'	'm1_AKG[m1_c] + m1_isoleucine[m1_c] <=> m1_2-oxo-3-methylvalerate[m1_c] + m1_glutamate[m1_c]'	0.000142436	0	0.000142436	1	0.000142436	'm1_Valine, leucine, and isoleucine metabolism'	''
'm1_HMR_3778'	'm1_AKG[m1_m] + m1_isoleucine[m1_m] <=> m1_2-oxo-3-methylvalerate[m1_m] + m1_glutamate[m1_m]'	0	0	0	NaN	NaN	'm1_Valine, leucine, and isoleucine metabolism'	'm1_Bcat2(lgFC:0.1284FDR:0.99096)'
'm1_HMR_3795'	'm1_2-methyl-3-oxopropanoate[m1_m] + m1_CoA[m1_m] + m1_NAD+[m1_m] => m1_CO2[m1_m] + m1_H+[m1_m] + m1_NADH[m1_m] + m1_propanoyl-CoA[m1_m]'	0	0	0	NaN	NaN	'm1_Valine, leucine, and isoleucine metabolism'	'm1_Aldh6a1(lgFC:0.07587FDR:0.99582)'
'm1_HMR_4797'	'm1_2-methyl-3-oxopropanoate[m1_c] + m1_H2O[m1_c] + m1_NAD+[m1_c] => m1_H+[m1_c] + m1_methylmalonate[m1_c] + m1_NADH[m1_c]'	0	0	0	NaN	NaN	'm1_Valine, leucine, and isoleucine metabolism'	'm1_Aldh1b1(lgFC:-0.28921FDR:0.73037) or m1_Aldh2(lgFC:-0.029657FDR:1) or m1_Aldh3a2(lgFC:-0.10108FDR:1) or m1_Aldh7a1(lgFC:-0.19043FDR:0.71271) or m1_Aldh9a1(lgFC:0.08386FDR:0.98923)'
'm1_HMR_6417'	'm1_CoA[m1_m] + m1_S-(2-methylpropanoyl)-dihydrolipoamide[m1_m] <=> m1_dihydrolipoamide[m1_m] + m1_isobutyryl-CoA[m1_m]'	0	0	0	NaN	NaN	'm1_Valine, leucine, and isoleucine metabolism'	'm1_Dbt(lgFC:-0.11642FDR:0.98278)'
'm1_HMR_6419'	'm1_2-oxo-3-methylvalerate[m1_m] + m1_lipoamide[m1_m] => m1_CO2[m1_m] + m1_S-(2-methylbutanoyl)-dihydrolipoamide[m1_m]'	0	0	0	NaN	NaN	'm1_Valine, leucine, and isoleucine metabolism'	'm1_Bckdha(lgFC:0.039637FDR:1) or m1_Bckdhb(lgFC:-0.16996FDR:0.90744)'
'm1_HMR_6420'	'm1_CoA[m1_m] + m1_S-(2-methylbutanoyl)-dihydrolipoamide[m1_m] => m1_2-methylbutyryl-CoA[m1_m] + m1_dihydrolipoamide[m1_m]'	0	0	0	NaN	NaN	'm1_Valine, leucine, and isoleucine metabolism'	'm1_Dbt(lgFC:-0.11642FDR:0.98278)'
'm1_HMR_6421'	'm1_4-methyl-2-oxopentanoate[m1_m] + m1_lipoamide[m1_m] => m1_CO2[m1_m] + m1_S-(3-methylbutanoyl)-dihydrolipoamide[m1_m]'	0	0	0	NaN	NaN	'm1_Valine, leucine, and isoleucine metabolism'	'm1_Bckdha(lgFC:0.039637FDR:1) or m1_Bckdhb(lgFC:-0.16996FDR:0.90744)'
'm1_HMR_6422'	'm1_CoA[m1_m] + m1_S-(3-methylbutanoyl)-dihydrolipoamide[m1_m] => m1_dihydrolipoamide[m1_m] + m1_isovaleryl-CoA[m1_m]'	0	0	0	NaN	NaN	'm1_Valine, leucine, and isoleucine metabolism'	'm1_Dbt(lgFC:-0.11642FDR:0.98278)'
'm1_HMR_6923'	'm1_AKG[m1_c] + m1_leucine[m1_c] <=> m1_4-methyl-2-oxopentanoate[m1_c] + m1_glutamate[m1_c]'	0.0088825	0	0.0088825	1	0.0088825	'm1_Valine, leucine, and isoleucine metabolism'	''
'm1_HMR_3765'	'm1_AKG[m1_m] + m1_leucine[m1_m] <=> m1_4-methyl-2-oxopentanoate[m1_m] + m1_glutamate[m1_m]'	0	0	0	NaN	NaN	'm1_Valine, leucine, and isoleucine metabolism'	'm1_Bcat2(lgFC:0.1284FDR:0.99096)'
'm1_HMR_8088'	'm1_2-methyl-3-oxopropanoate[m1_m] + m1_glutamate[m1_m] <=> m1_AKG[m1_m] + m1_L-3-amino-isobutanoate[m1_m]'	0	0	0	NaN	NaN	'm1_Valine, leucine, and isoleucine metabolism'	'm1_Abat(lgFC:0.25529FDR:0.74379)'
'm1_HMR_8787'	'm1_methylmalonyl-CoA[m1_m] => m1_CO2[m1_m] + m1_propanoyl-CoA[m1_m]'	0	0	0	NaN	NaN	'm1_Valine, leucine, and isoleucine metabolism'	'm1_Mlycd(lgFC:0.13029FDR:0.92592)'
'm1_HMR_3743'	'm1_CoA[m1_m] + m1_N-arachidonoylglycine[m1_m] <=> m1_arachidonyl-CoA[m1_m] + m1_glycine[m1_m]'	0	0	0	NaN	NaN	'm1_Phenylalanine, tyrosine and tryptophan biosynthesis'	'm1_Glyat(lgFC:-0.11684FDR:1)'
'm1_HMR_3940'	'm1_O2[m1_c] + m1_phenylalanine[m1_c] + m1_tetrahydrobiopterin[m1_c] => m1_dihydrobiopterin[m1_c] + m1_H2O[m1_c] + m1_tyrosine[m1_c]'	0.00179005	0	0.00179005	1	0.00179005	'm1_Phenylalanine, tyrosine and tryptophan biosynthesis'	'm1_Pah(lgFC:-0.17098FDR:1)'
'm1_HMR_4214'	'm1_O2[m1_c] + m1_tryptophan[m1_c] => m1_L-formylkynurenine[m1_c]'	0.00107073	0	0.00107073	1	0.00107073	'm1_Phenylalanine, tyrosine and tryptophan biosynthesis'	'm1_Tdo2(lgFC:0.23274FDR:1)'
'm1_HMR_4216'	'm1_H2O[m1_c] + m1_L-formylkynurenine[m1_c] => m1_formate[m1_c] + m1_kynurenine[m1_c]'	0.00107073	0	0.00107073	1	0.00107073	'm1_Phenylalanine, tyrosine and tryptophan biosynthesis'	'm1_Afmid(lgFC:-0.14937FDR:1)'
'm1_HMR_4218'	'm1_H2O[m1_c] + m1_L-formylkynurenine[m1_c] => m1_alanine[m1_c] + m1_formylanthranilate[m1_c]'	0	0	0	NaN	NaN	'm1_Phenylalanine, tyrosine and tryptophan biosynthesis'	'm1_Kynu(lgFC:0.058454FDR:1)'
'm1_HMR_4219'	'm1_formylanthranilate[m1_c] + m1_H2O[m1_c] => m1_anthranilate[m1_c] + m1_formate[m1_c]'	0	0	0	NaN	NaN	'm1_Phenylalanine, tyrosine and tryptophan biosynthesis'	'm1_Afmid(lgFC:-0.14937FDR:1)'
'm1_HMR_4220'	'm1_H+[m1_c] + m1_kynurenine[m1_c] + m1_NADPH[m1_c] + m1_O2[m1_c] => m1_3-hydroxy-L-kynurenine[m1_c] + m1_H2O[m1_c] + m1_NADP+[m1_c]'	0	0	0	NaN	NaN	'm1_Phenylalanine, tyrosine and tryptophan biosynthesis'	'm1_Kmo(lgFC:-0.051235FDR:1)'
'm1_HMR_4222'	'm1_AKG[m1_c] + m1_kynurenine[m1_c] <=> m1_4-hydroxy-2-quinolinecarboxylic acid[m1_c] + m1_glutamate[m1_c] + m1_H2O[m1_c]'	0	0	0	NaN	NaN	'm1_Phenylalanine, tyrosine and tryptophan biosynthesis'	'm1_Aadat(lgFC:0.42555FDR:0.73193)'
'm1_HMR_4224'	'm1_H2O[m1_c] + m1_kynurenine[m1_c] => m1_alanine[m1_c] + m1_anthranilate[m1_c]'	0.00107073	0	0.00107073	1	0.00107073	'm1_Phenylalanine, tyrosine and tryptophan biosynthesis'	'm1_Kynu(lgFC:0.058454FDR:1)'
'm1_HMR_9866'	'm1_anthranilate[m1_c] + m1_FADH2[m1_c] + m1_O2[m1_c] <=> m1_3-hydroxyanthranilate[m1_c] + m1_FAD[m1_c] + m1_H2O[m1_c]'	0.00107073	0	0.00107073	NaN	NaN	'm1_Phenylalanine, tyrosine and tryptophan biosynthesis'	''
'm1_HMR_4225'	'm1_3-hydroxy-L-kynurenine[m1_c] + m1_H2O[m1_c] => m1_3-hydroxyanthranilate[m1_c] + m1_alanine[m1_c]'	0	0	0	NaN	NaN	'm1_Phenylalanine, tyrosine and tryptophan biosynthesis'	'm1_Kynu(lgFC:0.058454FDR:1)'
'm1_HMR_4227'	'2 m1_3-hydroxyanthranilate[m1_c] + 4 m1_O2[m1_c] => m1_cinnavalininate[m1_c] + 2 m1_H+[m1_c] + 2 m1_H2O2[m1_c] + 2 m1_O2-[m1_c]'	0	0	0	NaN	NaN	'm1_Phenylalanine, tyrosine and tryptophan biosynthesis'	'm1_Cat(lgFC:0.090213FDR:1)'
'm1_HMR_4231'	'm1_2-amino-3-carboxymuconate semialdehyde[m1_c] => m1_2-aminomuconate semialdehyde[m1_c] + m1_CO2[m1_c]'	0.00107073	0	0.00107073	0.912097	0.000976609	'm1_Phenylalanine, tyrosine and tryptophan biosynthesis'	'm1_Acmsd(lgFC:-0.59018FDR:0.73818)'
'm1_HMR_4232'	'm1_2-aminomuconate semialdehyde[m1_c] <=> m1_H2O[m1_c] + m1_picolinic acid[m1_c]'	0	0	0	NaN	NaN	'm1_Phenylalanine, tyrosine and tryptophan biosynthesis'	''
'm1_HMR_4233'	'm1_2-aminomuconate semialdehyde[m1_c] + m1_H2O[m1_c] + m1_NAD+[m1_c] => m1_2-aminomuconate[m1_c] + m1_H+[m1_c] + m1_NADH[m1_c]'	0.00107073	0	0.00107073	NaN	NaN	'm1_Phenylalanine, tyrosine and tryptophan biosynthesis'	''
'm1_HMR_4235'	'm1_2-aminomuconate[m1_c] + m1_H+[m1_c] + m1_H2O[m1_c] + m1_NADPH[m1_c] => m1_2-oxoadipate[m1_c] + m1_NADP+[m1_c] + m1_NH3[m1_c]'	0.00107073	0	0.00107073	NaN	NaN	'm1_Phenylalanine, tyrosine and tryptophan biosynthesis'	''
'm1_HMR_4242'	'm1_glutaryl-CoA[m1_m] + m1_ubiquinone[m1_m] => m1_CO2[m1_m] + m1_crotonyl-CoA[m1_m] + m1_ubiquinol[m1_m]'	0.00586622	0	0.00586622	0.999667	0.00586427	'm1_Phenylalanine, tyrosine and tryptophan biosynthesis'	'm1_Gcdh(lgFC:-0.05744FDR:0.99146)'
'm1_HMR_4243'	'm1_FAD[m1_m] + m1_glutaryl-CoA[m1_m] => m1_CO2[m1_m] + m1_crotonyl-CoA[m1_m] + m1_FADH2[m1_m]'	0	0	0	NaN	NaN	'm1_Phenylalanine, tyrosine and tryptophan biosynthesis'	'm1_Gcdh(lgFC:-0.05744FDR:0.99146)'
'm1_HMR_4244'	'm1_3-hydroxy-L-kynurenine[m1_c] + m1_AKG[m1_c] => m1_4-(2-amino-3-hydroxyphenyl)-2,4-dioxobutanoate[m1_c] + m1_glutamate[m1_c]'	0	0	0	NaN	NaN	'm1_Phenylalanine, tyrosine and tryptophan biosynthesis'	'm1_Aadat(lgFC:0.42555FDR:0.73193)'
'm1_HMR_4245'	'm1_4-(2-amino-3-hydroxyphenyl)-2,4-dioxobutanoate[m1_c] => m1_H2O[m1_c] + m1_xanthurenate[m1_c]'	0	0	0	NaN	NaN	'm1_Phenylalanine, tyrosine and tryptophan biosynthesis'	''
'm1_HMR_4246'	'm1_3-hydroxy-L-kynurenine[m1_c] + m1_AKG[m1_c] => m1_glutamate[m1_c] + m1_H2O[m1_c] + m1_xanthurenate[m1_c]'	0	0	0	NaN	NaN	'm1_Phenylalanine, tyrosine and tryptophan biosynthesis'	'm1_Aadat(lgFC:0.42555FDR:0.73193)'
'm1_HMR_6707'	'm1_tryptophan[m1_c] => m1_CO2[m1_c] + m1_tryptamine[m1_c]'	0	0	0	NaN	NaN	'm1_Phenylalanine, tyrosine and tryptophan biosynthesis'	'm1_Ddc(lgFC:0.3309FDR:0.90719)'
'm1_HMR_6709'	'm1_beta-carboline[m1_c] + 2 m1_H+[m1_c] + m1_H2O[m1_c] <=> m1_tryptophan[m1_c]'	0	0	0	NaN	NaN	'm1_Phenylalanine, tyrosine and tryptophan biosynthesis'	''
'm1_HMR_6710'	'm1_beta-carboline[m1_c] + m1_SAM[m1_c] => m1_harman[m1_c] + m1_SAH[m1_c]'	0	0	0	NaN	NaN	'm1_Phenylalanine, tyrosine and tryptophan biosynthesis'	'm1_Alkbh8(lgFC:0.054544FDR:0.99243) or m1_Carm1(lgFC:-0.075007FDR:0.99529) or m1_Comtd1(lgFC:-0.82036FDR:0.4914) or m1_Coq5(lgFC:-0.21325FDR:0.64031) or m1_Ftsj1(lgFC:-0.056651FDR:0.99644) or m1_Hemk1(lgFC:-0.15263FDR:0.98475) or m1_Lcmt2(lgFC:0.25712FDR:0.62776) or m1_Mepce(lgFC:-0.10766FDR:0.89682) or m1_Mettl13(lgFC:-0.34414FDR:0.70471) or m1_Mettl15(lgFC:0.20679FDR:0.91333) or m1_Mettl16(lgF…
'm1_HMR_6711'	'm1_SAM[m1_c] + m1_tryptamine[m1_c] => m1_N-methyltryptamine[m1_c] + m1_SAH[m1_c]'	0	0	0	NaN	0	'm1_Phenylalanine, tyrosine and tryptophan biosynthesis'	'm1_Inmt(lgFC:-1.8447FDR:0.031433)'
'm1_HMR_6713'	'm1_H2O[m1_c] + m1_O2[m1_c] + m1_tryptamine[m1_c] => m1_H2O2[m1_c] + m1_indole-3-acetaldehyde[m1_c] + m1_NH3[m1_c]'	0	0	0	NaN	NaN	'm1_Phenylalanine, tyrosine and tryptophan biosynthesis'	'm1_Maoa(lgFC:-0.0064235FDR:1) or m1_Maob(lgFC:-0.2131FDR:0.84186)'
'm1_HMR_6714'	'm1_H2O[m1_c] + m1_indole-3-acetaldehyde[m1_c] + m1_NAD+[m1_c] => m1_H+[m1_c] + m1_indoleacetate[m1_c] + m1_NADH[m1_c]'	0	0	0	NaN	NaN	'm1_Phenylalanine, tyrosine and tryptophan biosynthesis'	'm1_Aldh1b1(lgFC:-0.28921FDR:0.73037) or m1_Aldh2(lgFC:-0.029657FDR:1) or m1_Aldh3a2(lgFC:-0.10108FDR:1) or m1_Aldh7a1(lgFC:-0.19043FDR:0.71271) or m1_Aldh9a1(lgFC:0.08386FDR:0.98923)'
'm1_HMR_6715'	'm1_indoleacetate[m1_c] + m1_SAM[m1_c] => m1_methyl-indole-3-acetate[m1_c] + m1_SAH[m1_c]'	0	0	0	NaN	0	'm1_Phenylalanine, tyrosine and tryptophan biosynthesis'	'm1_Comt(lgFC:-0.73343FDR:0.25162)'
'm1_HMR_6716'	'm1_5-hydroxy-L-tryptophan[m1_c] + m1_O2[m1_c] => m1_5-hydroxy-N-formylkynurenine[m1_c]'	0	0	0	NaN	NaN	'm1_Phenylalanine, tyrosine and tryptophan biosynthesis'	''
'm1_HMR_6717'	'm1_5-hydroxy-N-formylkynurenine[m1_c] + m1_H2O[m1_c] => m1_5-hydroxykynurenine[m1_c] + m1_formate[m1_c]'	0	0	0	NaN	NaN	'm1_Phenylalanine, tyrosine and tryptophan biosynthesis'	'm1_Afmid(lgFC:-0.14937FDR:1)'
'm1_HMR_6718'	'm1_5-hydroxykynurenine[m1_c] => m1_5-hydroxykynurenamine[m1_c] + m1_CO2[m1_c]'	0	0	0	NaN	NaN	'm1_Phenylalanine, tyrosine and tryptophan biosynthesis'	'm1_Ddc(lgFC:0.3309FDR:0.90719)'
'm1_HMR_6719'	'm1_5-hydroxykynurenamine[m1_c] + m1_O2[m1_c] => m1_4,6-dihydroxyquinoline[m1_c] + m1_H2O2[m1_c] + m1_NH3[m1_c]'	0	0	0	NaN	NaN	'm1_Phenylalanine, tyrosine and tryptophan biosynthesis'	'm1_Maoa(lgFC:-0.0064235FDR:1) or m1_Maob(lgFC:-0.2131FDR:0.84186)'
'm1_HMR_6720'	'2 m1_H+[m1_c] + m1_kynurenine[m1_c] + m1_UDP-glucuronate[m1_c] => m1_3-hydroxykynurenine-O-beta-D-glucoside[m1_c] + m1_UDP[m1_c]'	0	0	0	NaN	NaN	'm1_Phenylalanine, tyrosine and tryptophan biosynthesis'	''
'm1_HMR_6721'	'm1_3-hydroxykynurenine-O-beta-D-glucoside[m1_c] + m1_H+[m1_c] + m1_NADH[m1_c] => m1_4-(2-amino-3-hydroxyphenyl)-4-oxobutanoic acid-O-glucoside[m1_c] + m1_NAD+[m1_c] + m1_NH3[m1_c]'	0	0	0	NaN	NaN	'm1_Phenylalanine, tyrosine and tryptophan biosynthesis'	''
'm1_HMR_6723'	'm1_3-hydroxykynurenine-O-beta-D-glucoside[m1_c] + m1_GSH[m1_c] => m1_glutathionyl-3-hydroxykynurenine glucoside[m1_c] + m1_H2O[m1_c]'	0	0	0	NaN	NaN	'm1_Phenylalanine, tyrosine and tryptophan biosynthesis'	'm1_Gm3776(lgFC:0.69634FDR:0.93702) or m1_Gsta1(lgFC:1.043FDR:0.9051) or m1_Gsta2(lgFC:-0.70672FDR:0.64616) or m1_Gsta3(lgFC:-0.58913FDR:0.58625) or m1_Gstk1(lgFC:0.027269FDR:1) or m1_Gstm1(lgFC:-0.73607FDR:0.035023) or m1_Gstm2(lgFC:-0.31553FDR:0.80509) or m1_Gstm4(lgFC:-0.54065FDR:0.15386) or m1_Gstm5(lgFC:0.12224FDR:0.99096) or m1_Gsto1(lgFC:-0.23FDR:0.86176) or m1_Gsto2(lgFC:0.2068FDR:1) or m…
'm1_HMR_6725'	'm1_AKG[m1_c] + m1_phenylalanine[m1_c] <=> m1_glutamate[m1_c] + m1_phenylpyruvate[m1_c]'	0	0	0	NaN	NaN	'm1_Phenylalanine, tyrosine and tryptophan biosynthesis'	'm1_Got1(lgFC:0.17494FDR:0.98301) or m1_Got2(lgFC:0.26533FDR:0.94457) or m1_Tat(lgFC:0.1225FDR:1)'
'm1_HMR_6726'	'm1_O2[m1_c] + m1_phenylpyruvate[m1_c] => m1_2-hydroxyphenylacetate[m1_c] + m1_CO2[m1_c]'	0	0	0	NaN	NaN	'm1_Phenylalanine, tyrosine and tryptophan biosynthesis'	'm1_Hpd(lgFC:-0.028105FDR:1)'
'm1_HMR_6727'	'm1_phenylpyruvate[m1_c] => m1_2-hydroxy-3-phenylpropenoate[m1_c]'	0	0	0	NaN	NaN	'm1_Phenylalanine, tyrosine and tryptophan biosynthesis'	'm1_Mif(lgFC:-0.13672FDR:0.93562)'
'm1_HMR_6728'	'm1_O2[m1_c] + m1_tetrahydrobiopterin[m1_c] + m1_tyrosine[m1_c] => m1_dihydrobiopterin[m1_c] + m1_H2O[m1_c] + m1_L-dopa[m1_c]'	0	0	0	NaN	NaN	'm1_Phenylalanine, tyrosine and tryptophan biosynthesis'	''
'm1_HMR_6729'	'2 m1_H+[m1_c] + m1_O2[m1_c] + m1_tyrosine[m1_c] => m1_H2O[m1_c] + m1_L-dopa[m1_c]'	0	0	0	NaN	NaN	'm1_Phenylalanine, tyrosine and tryptophan biosynthesis'	''
'm1_HMR_6730'	'm1_L-dopa[m1_c] + m1_SAM[m1_c] => m1_3-O-methyldopa[m1_c] + m1_SAH[m1_c]'	0	0	0	NaN	0	'm1_Phenylalanine, tyrosine and tryptophan biosynthesis'	'm1_Comt(lgFC:-0.73343FDR:0.25162)'
'm1_HMR_6731'	'm1_L-dopa[m1_c] => m1_CO2[m1_c] + m1_dopamine[m1_c]'	0	0	0	NaN	NaN	'm1_Phenylalanine, tyrosine and tryptophan biosynthesis'	'm1_Ddc(lgFC:0.3309FDR:0.90719)'
'm1_HMR_6734'	'm1_H2O[m1_c] + m1_salsolinol[m1_c] <=> m1_acetaldehyde[m1_c] + m1_dopamine[m1_c]'	0	0	0	NaN	NaN	'm1_Phenylalanine, tyrosine and tryptophan biosynthesis'	''
'm1_HMR_6735'	'm1_salsolinol[m1_c] + m1_SAM[m1_c] => m1_SAH[m1_c] + m1_salsoline[m1_c]'	0	0	0	NaN	0	'm1_Phenylalanine, tyrosine and tryptophan biosynthesis'	'm1_Comt(lgFC:-0.73343FDR:0.25162)'
'm1_HMR_6736'	'm1_salsolinol[m1_c] + m1_SAM[m1_c] => m1_N-methylsalsolinol[m1_c] + m1_SAH[m1_c]'	0	0	0	NaN	0	'm1_Phenylalanine, tyrosine and tryptophan biosynthesis'	'm1_Comt(lgFC:-0.73343FDR:0.25162)'
'm1_HMR_6738'	'm1_H2O[m1_c] + m1_salsolinol-1-carboxylate[m1_c] <=> m1_dopamine[m1_c] + m1_pyruvate[m1_c]'	0	0	0	NaN	NaN	'm1_Phenylalanine, tyrosine and tryptophan biosynthesis'	''
'm1_HMR_6740'	'm1_salsolinol-1-carboxylate[m1_c] => m1_1,2-dehydrosalsolinol[m1_c] + m1_CO2[m1_c] + 2 m1_H+[m1_c]'	0	0	0	NaN	NaN	'm1_Phenylalanine, tyrosine and tryptophan biosynthesis'	'm1_Ddc(lgFC:0.3309FDR:0.90719)'
'm1_HMR_6741'	'm1_ascorbate[m1_c] + m1_dopamine[m1_c] + m1_O2[m1_c] => m1_dehydroascorbic acid[m1_c] + m1_H2O[m1_c] + m1_noradrenaline[m1_c]'	0	0	0	NaN	NaN	'm1_Phenylalanine, tyrosine and tryptophan biosynthesis'	''
'm1_HMR_6742'	'm1_4,6,7-trihydroxy-1,2,3,4-tetrahydroisoquinoline[m1_c] + m1_H2O[m1_c] <=> m1_formaldehyde[m1_c] + m1_noradrenaline[m1_c]'	0	0	0	NaN	NaN	'm1_Phenylalanine, tyrosine and tryptophan biosynthesis'	''
'm1_HMR_6743'	'm1_noradrenaline[m1_c] + m1_SAM[m1_c] => m1_adrenaline[m1_c] + m1_SAH[m1_c]'	0	0	0	NaN	NaN	'm1_Phenylalanine, tyrosine and tryptophan biosynthesis'	''
'm1_HMR_6745'	'm1_adrenaline[m1_c] + m1_H2O[m1_c] + m1_O2[m1_c] => m1_3,4-dihydroxymandelaldehyde[m1_c] + m1_H2O2[m1_c] + m1_methylamine[m1_c]'	0	0	0	NaN	NaN	'm1_Phenylalanine, tyrosine and tryptophan biosynthesis'	'm1_Maoa(lgFC:-0.0064235FDR:1) or m1_Maob(lgFC:-0.2131FDR:0.84186)'
'm1_HMR_6746'	'm1_adrenaline[m1_c] + m1_SAM[m1_c] => m1_L-metanephrine[m1_c] + m1_SAH[m1_c]'	0	0	0	NaN	0	'm1_Phenylalanine, tyrosine and tryptophan biosynthesis'	'm1_Comt(lgFC:-0.73343FDR:0.25162)'
'm1_HMR_6747'	'm1_H2O[m1_c] + m1_L-metanephrine[m1_c] + m1_O2[m1_c] => m1_3-methoxy-4-hydroxyphenylglycolaldehyde[m1_c] + m1_H2O2[m1_c] + m1_methylamine[m1_c]'	0	0	0	NaN	NaN	'm1_Phenylalanine, tyrosine and tryptophan biosynthesis'	'm1_Maoa(lgFC:-0.0064235FDR:1) or m1_Maob(lgFC:-0.2131FDR:0.84186)'
'm1_HMR_6748'	'm1_3-methoxy-4-hydroxyphenylglycolaldehyde[m1_c] + m1_H2O[m1_c] + m1_NAD+[m1_c] => m1_H+[m1_c] + m1_NADH[m1_c] + m1_vanillylmandelate[m1_c]'	1	0	1	NaN	1.20652	'm1_Phenylalanine, tyrosine and tryptophan biosynthesis'	'm1_Aldh1a3(lgFC:1.087FDR:0.44812) or m1_Aldh3b1(lgFC:-0.15805FDR:0.99096)'
'm1_HMR_6749'	'm1_3-methoxy-4-hydroxyphenylglycolaldehyde[m1_c] + m1_H2O[m1_c] + m1_NADP+[m1_c] <=> m1_H+[m1_c] + m1_NADPH[m1_c] + m1_vanillylmandelate[m1_c]'	1	0	1	NaN	1.20652	'm1_Phenylalanine, tyrosine and tryptophan biosynthesis'	'm1_Aldh1a3(lgFC:1.087FDR:0.44812) or m1_Aldh3b1(lgFC:-0.15805FDR:0.99096)'
'm1_HMR_6750'	'm1_noradrenaline[m1_c] + m1_SAM[m1_c] => m1_normetanephrine[m1_c] + m1_SAH[m1_c]'	0	0	0	NaN	0	'm1_Phenylalanine, tyrosine and tryptophan biosynthesis'	'm1_Comt(lgFC:-0.73343FDR:0.25162)'
'm1_HMR_6751'	'm1_H2O[m1_c] + m1_normetanephrine[m1_c] + m1_O2[m1_c] => m1_3-methoxy-4-hydroxyphenylglycolaldehyde[m1_c] + m1_H2O2[m1_c] + m1_NH3[m1_c]'	0	0	0	NaN	NaN	'm1_Phenylalanine, tyrosine and tryptophan biosynthesis'	'm1_Maoa(lgFC:-0.0064235FDR:1) or m1_Maob(lgFC:-0.2131FDR:0.84186)'
'm1_HMR_6752'	'm1_H2O[m1_c] + m1_noradrenaline[m1_c] + m1_O2[m1_c] => m1_3,4-dihydroxymandelaldehyde[m1_c] + m1_H2O2[m1_c] + m1_NH3[m1_c]'	0	0	0	NaN	NaN	'm1_Phenylalanine, tyrosine and tryptophan biosynthesis'	'm1_Maoa(lgFC:-0.0064235FDR:1) or m1_Maob(lgFC:-0.2131FDR:0.84186)'
'm1_HMR_6753'	'm1_3,4-dihydroxymandelaldehyde[m1_c] + m1_H2O[m1_c] + m1_NAD+[m1_c] => m1_3,4-dihydroxymandelate[m1_c] + m1_H+[m1_c] + m1_NADH[m1_c]'	1	0	1	NaN	1.20652	'm1_Phenylalanine, tyrosine and tryptophan biosynthesis'	'm1_Aldh1a3(lgFC:1.087FDR:0.44812) or m1_Aldh3b1(lgFC:-0.15805FDR:0.99096)'
'm1_HMR_6754'	'm1_3,4-dihydroxymandelaldehyde[m1_c] + m1_H2O[m1_c] + m1_NADP+[m1_c] <=> m1_3,4-dihydroxymandelate[m1_c] + m1_H+[m1_c] + m1_NADPH[m1_c]'	1	0	1	NaN	1.20652	'm1_Phenylalanine, tyrosine and tryptophan biosynthesis'	'm1_Aldh1a3(lgFC:1.087FDR:0.44812) or m1_Aldh3b1(lgFC:-0.15805FDR:0.99096)'
'm1_HMR_6755'	'm1_3,4-dihydroxymandelate[m1_c] + m1_SAM[m1_c] <=> m1_SAH[m1_c] + m1_vanillylmandelate[m1_c]'	0	0	0	NaN	0	'm1_Phenylalanine, tyrosine and tryptophan biosynthesis'	'm1_Comt(lgFC:-0.73343FDR:0.25162)'
'm1_HMR_6756'	'm1_3,4-dihydroxymandelaldehyde[m1_c] + m1_H+[m1_c] + m1_NADH[m1_c] <=> m1_3,4-dihydroxyphenylethyleneglycol[m1_c] + m1_NAD+[m1_c]'	0	0	0	NaN	NaN	'm1_Phenylalanine, tyrosine and tryptophan biosynthesis'	'm1_Adh1(lgFC:-0.71411FDR:0.44374) or m1_Adh4(lgFC:-0.57187FDR:0.3751) or m1_Adh5(lgFC:-0.021378FDR:1) or m1_Adh7(lgFC:0.0061505FDR:1) or m1_Adhfe1(lgFC:0.17131FDR:0.97231)'
'm1_HMR_6758'	'm1_dopamine[m1_c] + m1_H2O[m1_c] + m1_O2[m1_c] => m1_3,4-dihydroxyphenylacetaldehyde[m1_c] + m1_H2O2[m1_c] + m1_NH3[m1_c]'	0	0	0	NaN	NaN	'm1_Phenylalanine, tyrosine and tryptophan biosynthesis'	'm1_Aoc2(lgFC:0.73402FDR:0.61336) or m1_Aoc3(lgFC:-0.59812FDR:0.92597) or m1_Maoa(lgFC:-0.0064235FDR:1) or m1_Maob(lgFC:-0.2131FDR:0.84186)'
'm1_HMR_6760'	'm1_3,4-dihydroxyphenylacetaldehyde[m1_c] + m1_H2O[m1_c] + m1_NAD+[m1_c] => m1_3,4-dihydroxyphenylacetate[m1_c] + m1_H+[m1_c] + m1_NADH[m1_c]'	1	0	1	NaN	1.20652	'm1_Phenylalanine, tyrosine and tryptophan biosynthesis'	'm1_Aldh1a3(lgFC:1.087FDR:0.44812) or m1_Aldh3b1(lgFC:-0.15805FDR:0.99096)'
'm1_HMR_6761'	'm1_3,4-dihydroxyphenylacetaldehyde[m1_c] + m1_H2O[m1_c] + m1_NADP+[m1_c] <=> m1_3,4-dihydroxyphenylacetate[m1_c] + m1_H+[m1_c] + m1_NADPH[m1_c]'	1	0	1	NaN	1.20652	'm1_Phenylalanine, tyrosine and tryptophan biosynthesis'	'm1_Aldh1a3(lgFC:1.087FDR:0.44812) or m1_Aldh3b1(lgFC:-0.15805FDR:0.99096)'
'm1_HMR_6762'	'm1_3,4-dihydroxyphenylacetate[m1_c] + m1_SAM[m1_c] => m1_homovanillate[m1_c] + m1_SAH[m1_c]'	0	0	0	NaN	0	'm1_Phenylalanine, tyrosine and tryptophan biosynthesis'	'm1_Comt(lgFC:-0.73343FDR:0.25162)'
'm1_HMR_6763'	'm1_dopamine[m1_c] + m1_SAM[m1_c] => m1_3-methoxytyramine[m1_c] + m1_SAH[m1_c]'	0	0	0	NaN	0	'm1_Phenylalanine, tyrosine and tryptophan biosynthesis'	'm1_Comt(lgFC:-0.73343FDR:0.25162)'
'm1_HMR_6764'	'm1_3-methoxytyramine[m1_c] + m1_H2O[m1_c] + m1_O2[m1_c] => m1_3-methoxy-4-hydroxyphenylacetaldehyde[m1_c] + m1_H2O2[m1_c] + m1_NH3[m1_c]'	0	0	0	NaN	NaN	'm1_Phenylalanine, tyrosine and tryptophan biosynthesis'	'm1_Maoa(lgFC:-0.0064235FDR:1) or m1_Maob(lgFC:-0.2131FDR:0.84186)'
'm1_HMR_6765'	'm1_3-methoxytyramine[m1_c] + m1_acetaldehyde[m1_c] <=> m1_H2O[m1_c] + m1_N-methylsalsolinol[m1_c]'	0	0	0	NaN	NaN	'm1_Phenylalanine, tyrosine and tryptophan biosynthesis'	''
'm1_HMR_6766'	'm1_3-methoxy-4-hydroxyphenylacetaldehyde[m1_c] + m1_H2O[m1_c] + m1_NAD+[m1_c] => m1_H+[m1_c] + m1_homovanillate[m1_c] + m1_NADH[m1_c]'	1	0	1	NaN	1.20652	'm1_Phenylalanine, tyrosine and tryptophan biosynthesis'	'm1_Aldh1a3(lgFC:1.087FDR:0.44812) or m1_Aldh3b1(lgFC:-0.15805FDR:0.99096)'
'm1_HMR_6767'	'm1_3-methoxy-4-hydroxyphenylacetaldehyde[m1_c] + m1_H2O[m1_c] + m1_NADP+[m1_c] <=> m1_H+[m1_c] + m1_homovanillate[m1_c] + m1_NADPH[m1_c]'	1	0	1	NaN	1.20652	'm1_Phenylalanine, tyrosine and tryptophan biosynthesis'	'm1_Aldh1a3(lgFC:1.087FDR:0.44812) or m1_Aldh3b1(lgFC:-0.15805FDR:0.99096)'
'm1_HMR_6768'	'm1_AKG[m1_c] + m1_tyrosine[m1_c] => m1_4-hydroxyphenylpyruvate[m1_c] + m1_glutamate[m1_c]'	0.235061	0.235061	0.470123	1.00446	0.351438	'm1_Phenylalanine, tyrosine and tryptophan biosynthesis'	'm1_Got1(lgFC:0.17494FDR:0.98301) or m1_Got2(lgFC:0.26533FDR:0.94457) or m1_Tat(lgFC:0.1225FDR:1)'
'm1_HMR_6770'	'm1_H2O[m1_c] + m1_O2[m1_c] + m1_tyrosine[m1_c] => m1_4-hydroxyphenylpyruvate[m1_c] + m1_H2O2[m1_c] + m1_NH3[m1_c]'	0	0	0	NaN	NaN	'm1_Phenylalanine, tyrosine and tryptophan biosynthesis'	''
'm1_HMR_6771'	'm1_4-hydroxyphenylpyruvate[m1_c] => m1_2-hydroxy-3-(4-hydroxyphenyl)propenoate[m1_c]'	0	0	0	NaN	NaN	'm1_Phenylalanine, tyrosine and tryptophan biosynthesis'	'm1_Mif(lgFC:-0.13672FDR:0.93562)'
'm1_HMR_6772'	'm1_4-hydroxyphenylpyruvate[m1_c] + m1_O2[m1_c] => m1_CO2[m1_c] + m1_homogentisate[m1_c]'	0.235061	0.235061	0.470123	1	0.349878	'm1_Phenylalanine, tyrosine and tryptophan biosynthesis'	'm1_Hpd(lgFC:-0.028105FDR:1)'
'm1_HMR_6774'	'm1_homogentisate[m1_c] + m1_O2[m1_c] => m1_4-maleylacetoacetate[m1_c]'	0.235061	0.235061	0.470123	0.998431	0.349329	'm1_Phenylalanine, tyrosine and tryptophan biosynthesis'	'm1_Hgd(lgFC:-0.30896FDR:0.99186)'
'm1_HMR_6776'	'm1_4-maleylacetoacetate[m1_c] => m1_fumarylacetoacetate[m1_c]'	0.235061	0.235061	0.470123	1.00107	0.350252	'm1_Phenylalanine, tyrosine and tryptophan biosynthesis'	'm1_Gstz1(lgFC:0.11609FDR:0.98722)'
'm1_HMR_6778'	'm1_fumarylacetoacetate[m1_c] + m1_H2O[m1_c] => m1_acetoacetate[m1_c] + m1_fumarate[m1_c]'	0.235061	0.235061	0.470123	0.988753	0.345943	'm1_Phenylalanine, tyrosine and tryptophan biosynthesis'	'm1_Fah(lgFC:-0.18621FDR:0.90712)'
'm1_HMR_6782'	'm1_4-hydroxyphenylpyruvate[m1_c] + m1_H+[m1_c] + m1_NADH[m1_c] => m1_4-hydroxyphenyllactate[m1_c] + m1_NAD+[m1_c]'	0	0	0	NaN	NaN	'm1_Phenylalanine, tyrosine and tryptophan biosynthesis'	''
'm1_HMR_6783'	'm1_4-hydroxyphenyllactate[m1_c] + m1_H2O[m1_c] => m1_4-coumarate[m1_c] + 4 m1_H+[m1_c]'	0	0	0	NaN	NaN	'm1_Phenylalanine, tyrosine and tryptophan biosynthesis'	''
'm1_HMR_6784'	'm1_4-coumarate[m1_c] + m1_ATP[m1_c] + m1_CoA[m1_c] => m1_4-coumaroyl-CoA[m1_c] + m1_AMP[m1_c] + m1_PPi[m1_c]'	0	0	0	NaN	NaN	'm1_Phenylalanine, tyrosine and tryptophan biosynthesis'	''
'm1_HMR_6785'	'm1_4-coumaroyl-CoA[m1_c] + m1_CoA[m1_c] + m1_H2O[m1_c] + m1_NAD+[m1_c] => m1_4-hydroxybenzoyl-CoA[m1_c] + m1_acetyl-CoA[m1_c] + m1_H+[m1_c] + m1_NADH[m1_c]'	0	0	0	NaN	NaN	'm1_Phenylalanine, tyrosine and tryptophan biosynthesis'	''
'm1_HMR_6786'	'm1_4-hydroxybenzoyl-CoA[m1_c] + m1_H2O[m1_c] => m1_4-hydroxybenzoate[m1_c] + m1_CoA[m1_c]'	0	0	0	NaN	NaN	'm1_Phenylalanine, tyrosine and tryptophan biosynthesis'	''
'm1_HMR_6787'	'm1_tyrosine[m1_c] => m1_CO2[m1_c] + m1_tyramine[m1_c]'	0	0	0	NaN	NaN	'm1_Phenylalanine, tyrosine and tryptophan biosynthesis'	'm1_Ddc(lgFC:0.3309FDR:0.90719)'
'm1_HMR_6788'	'm1_SAM[m1_c] + m1_tyramine[m1_c] => m1_N-methyltyramine[m1_c] + m1_SAH[m1_c]'	0	0	0	NaN	0	'm1_Phenylalanine, tyrosine and tryptophan biosynthesis'	'm1_Comt(lgFC:-0.73343FDR:0.25162) or m1_Inmt(lgFC:-1.8447FDR:0.031433)'
'm1_HMR_6789'	'm1_H2O[m1_c] + m1_O2[m1_c] + m1_tyramine[m1_c] => m1_4-hydroxyphenylacetaldehyde[m1_c] + m1_H2O2[m1_c] + m1_NH3[m1_c]'	0	0	0	NaN	NaN	'm1_Phenylalanine, tyrosine and tryptophan biosynthesis'	'm1_Aoc2(lgFC:0.73402FDR:0.61336) or m1_Aoc3(lgFC:-0.59812FDR:0.92597) or m1_Maoa(lgFC:-0.0064235FDR:1) or m1_Maob(lgFC:-0.2131FDR:0.84186)'
'm1_HMR_6790'	'm1_4-hydroxyphenylacetaldehyde[m1_c] + m1_H2O[m1_c] + m1_NAD+[m1_c] => m1_4-hydroxyphenylacetate[m1_c] + m1_H+[m1_c] + m1_NADH[m1_c]'	1	0	1	NaN	1.20652	'm1_Phenylalanine, tyrosine and tryptophan biosynthesis'	'm1_Aldh1a3(lgFC:1.087FDR:0.44812) or m1_Aldh3b1(lgFC:-0.15805FDR:0.99096)'
'm1_HMR_6791'	'm1_4-hydroxyphenylacetaldehyde[m1_c] + m1_H2O[m1_c] + m1_NADP+[m1_c] <=> m1_4-hydroxyphenylacetate[m1_c] + m1_H+[m1_c] + m1_NADPH[m1_c]'	1	0	1	NaN	1.20652	'm1_Phenylalanine, tyrosine and tryptophan biosynthesis'	'm1_Aldh1a3(lgFC:1.087FDR:0.44812) or m1_Aldh3b1(lgFC:-0.15805FDR:0.99096)'
'm1_HMR_6798'	'm1_triiodothyronine[m1_c] + m1_UDP-glucuronate[m1_c] => m1_3,5,3-triiodo-L-thyronine-beta-D-glucuronoside[m1_c] + m1_UDP[m1_c]'	0	0	0	NaN	NaN	'm1_Phenylalanine, tyrosine and tryptophan biosynthesis'	'm1_Ugt1a1(lgFC:-0.17454FDR:1) or m1_Ugt1a5(lgFC:-0.46827FDR:0.78747) or m1_Ugt1a6a(lgFC:-0.19486FDR:0.99096) or m1_Ugt1a7c(lgFC:-0.01247FDR:1) or m1_Ugt2a3(lgFC:-0.23824FDR:0.93211) or m1_Ugt2b1(lgFC:-0.81985FDR:0.56842) or m1_Ugt2b34(lgFC:-0.37425FDR:0.99096) or m1_Ugt2b35(lgFC:-0.16759FDR:0.95481) or m1_Ugt2b38(lgFC:-0.61324FDR:0.88496)'
'm1_HMR_6799'	'm1_triiodothyronine[m1_r] + m1_UDP-glucuronate[m1_r] => m1_3,5,3-triiodo-L-thyronine-beta-D-glucuronoside[m1_r] + m1_UDP[m1_r]'	0	0	0	NaN	NaN	'm1_Phenylalanine, tyrosine and tryptophan biosynthesis'	'm1_Ugt1a1(lgFC:-0.17454FDR:1) or m1_Ugt1a5(lgFC:-0.46827FDR:0.78747) or m1_Ugt1a6a(lgFC:-0.19486FDR:0.99096) or m1_Ugt1a7c(lgFC:-0.01247FDR:1) or m1_Ugt2a3(lgFC:-0.23824FDR:0.93211) or m1_Ugt2b1(lgFC:-0.81985FDR:0.56842) or m1_Ugt2b34(lgFC:-0.37425FDR:0.99096) or m1_Ugt2b35(lgFC:-0.16759FDR:0.95481) or m1_Ugt2b38(lgFC:-0.61324FDR:0.88496)'
'm1_HMR_6800'	'm1_thyroxine[m1_c] + m1_UDP-glucuronate[m1_c] => m1_3,5,3,5-tetraiodo-L-thyronine-beta-D-glucuronoside[m1_c] + m1_UDP[m1_c]'	0	0	0	NaN	NaN	'm1_Phenylalanine, tyrosine and tryptophan biosynthesis'	'm1_Ugt1a1(lgFC:-0.17454FDR:1) or m1_Ugt1a5(lgFC:-0.46827FDR:0.78747) or m1_Ugt1a6a(lgFC:-0.19486FDR:0.99096) or m1_Ugt1a7c(lgFC:-0.01247FDR:1) or m1_Ugt2a3(lgFC:-0.23824FDR:0.93211) or m1_Ugt2b1(lgFC:-0.81985FDR:0.56842) or m1_Ugt2b34(lgFC:-0.37425FDR:0.99096) or m1_Ugt2b35(lgFC:-0.16759FDR:0.95481) or m1_Ugt2b38(lgFC:-0.61324FDR:0.88496)'
'm1_HMR_6801'	'm1_thyroxine[m1_r] + m1_UDP-glucuronate[m1_r] => m1_3,5,3,5-tetraiodo-L-thyronine-beta-D-glucuronoside[m1_r] + m1_UDP[m1_r]'	0	0	0	NaN	NaN	'm1_Phenylalanine, tyrosine and tryptophan biosynthesis'	'm1_Ugt1a1(lgFC:-0.17454FDR:1) or m1_Ugt1a5(lgFC:-0.46827FDR:0.78747) or m1_Ugt1a6a(lgFC:-0.19486FDR:0.99096) or m1_Ugt1a7c(lgFC:-0.01247FDR:1) or m1_Ugt2a3(lgFC:-0.23824FDR:0.93211) or m1_Ugt2b1(lgFC:-0.81985FDR:0.56842) or m1_Ugt2b34(lgFC:-0.37425FDR:0.99096) or m1_Ugt2b35(lgFC:-0.16759FDR:0.95481) or m1_Ugt2b38(lgFC:-0.61324FDR:0.88496)'
'm1_HMR_6802'	'm1_N-methyltyramine[m1_c] + m1_SAM[m1_c] => m1_hordenine[m1_c] + m1_SAH[m1_c]'	0	0	0	NaN	NaN	'm1_Phenylalanine, tyrosine and tryptophan biosynthesis'	''
'm1_HMR_6803'	'm1_hordenine[m1_c] + m1_O2[m1_c] => m1_H2O[m1_c] + m1_N,N-dimethyldopaminequinone[m1_c]'	0	0	0	NaN	NaN	'm1_Phenylalanine, tyrosine and tryptophan biosynthesis'	''
'm1_HMR_6806'	'2 m1_H+[m1_c] + m1_N,N-dimethylindoliumolate[m1_c] <=> m1_N,N-dimethyldopaminequinone[m1_c]'	0	0	0	NaN	NaN	'm1_Phenylalanine, tyrosine and tryptophan biosynthesis'	''
'm1_HMR_6808'	'm1_dopamine[m1_c] + m1_H2O2[m1_c] <=> m1_dopamine-O-quinone[m1_c] + 2 m1_H2O[m1_c]'	0	0	0	NaN	NaN	'm1_Phenylalanine, tyrosine and tryptophan biosynthesis'	'm1_Prdx6(lgFC:-0.17512FDR:0.82761) or m1_Pxdn(lgFC:-0.36541FDR:0.93689)'
'm1_HMR_6811'	'm1_dopamine-O-quinone[m1_c] + m1_GSH[m1_c] => m1_5-S-glutathionyl-dopamine[m1_c]'	0	0	0	NaN	NaN	'm1_Phenylalanine, tyrosine and tryptophan biosynthesis'	'm1_Gm3776(lgFC:0.69634FDR:0.93702) or m1_Gsta1(lgFC:1.043FDR:0.9051) or m1_Gsta2(lgFC:-0.70672FDR:0.64616) or m1_Gsta3(lgFC:-0.58913FDR:0.58625) or m1_Gstk1(lgFC:0.027269FDR:1) or m1_Gstm1(lgFC:-0.73607FDR:0.035023) or m1_Gstm2(lgFC:-0.31553FDR:0.80509) or m1_Gstm4(lgFC:-0.54065FDR:0.15386) or m1_Gstm5(lgFC:0.12224FDR:0.99096) or m1_Gsto1(lgFC:-0.23FDR:0.86176) or m1_Gsto2(lgFC:0.2068FDR:1) or m…
'm1_HMR_6813'	'm1_dopaminochrome[m1_c] + 2 m1_H+[m1_c] + m1_H2O[m1_c] <=> m1_dopamine-O-quinone[m1_c] + m1_H2O2[m1_c]'	0	0	0	NaN	NaN	'm1_Phenylalanine, tyrosine and tryptophan biosynthesis'	'm1_Prdx6(lgFC:-0.17512FDR:0.82761)'
'm1_HMR_6814'	'm1_dopaminochrome[m1_c] + m1_NADPH[m1_c] => m1_aminochrome-O-semiquinone[m1_c] + m1_NADP+[m1_c]'	0	0	0	NaN	NaN	'm1_Phenylalanine, tyrosine and tryptophan biosynthesis'	'm1_Cryz(lgFC:-0.065698FDR:1)'
'm1_HMR_6815'	'm1_dopaminochrome[m1_c] + m1_GSH[m1_c] => m1_5-S-glutathionyl-aminochrome reduced[m1_c]'	0	0	0	NaN	NaN	'm1_Phenylalanine, tyrosine and tryptophan biosynthesis'	'm1_Gm3776(lgFC:0.69634FDR:0.93702) or m1_Gsta1(lgFC:1.043FDR:0.9051) or m1_Gsta2(lgFC:-0.70672FDR:0.64616) or m1_Gsta3(lgFC:-0.58913FDR:0.58625) or m1_Gstk1(lgFC:0.027269FDR:1) or m1_Gstm1(lgFC:-0.73607FDR:0.035023) or m1_Gstm2(lgFC:-0.31553FDR:0.80509) or m1_Gstm4(lgFC:-0.54065FDR:0.15386) or m1_Gstm5(lgFC:0.12224FDR:0.99096) or m1_Gsto1(lgFC:-0.23FDR:0.86176) or m1_Gsto2(lgFC:0.2068FDR:1) or m…
'm1_HMR_6817'	'm1_dopaminochrome[m1_c] + m1_H+[m1_c] + m1_NADPH[m1_c] => m1_leukoaminochrome[m1_c] + m1_NADP+[m1_c]'	0	0	0	NaN	NaN	'm1_Phenylalanine, tyrosine and tryptophan biosynthesis'	'm1_Cryz(lgFC:-0.065698FDR:1)'
'm1_HMR_6818'	'm1_adrenaline[m1_c] => m1_adrenochrome[m1_c] + 4 m1_H+[m1_c]'	0	0	0	NaN	NaN	'm1_Phenylalanine, tyrosine and tryptophan biosynthesis'	''
'm1_HMR_6819'	'm1_adrenochrome[m1_c] + m1_NADPH[m1_c] => m1_adrenochrome-O-semiquinone[m1_c] + m1_NADP+[m1_c]'	0	0	0	NaN	NaN	'm1_Phenylalanine, tyrosine and tryptophan biosynthesis'	'm1_Cryz(lgFC:-0.065698FDR:1)'
'm1_HMR_6820'	'm1_adrenochrome[m1_c] + m1_GSH[m1_c] => m1_5-S-glutathionyl-adrenochrome hydroquinone[m1_c]'	0	0	0	NaN	NaN	'm1_Phenylalanine, tyrosine and tryptophan biosynthesis'	'm1_Gm3776(lgFC:0.69634FDR:0.93702) or m1_Gsta1(lgFC:1.043FDR:0.9051) or m1_Gsta2(lgFC:-0.70672FDR:0.64616) or m1_Gsta3(lgFC:-0.58913FDR:0.58625) or m1_Gstk1(lgFC:0.027269FDR:1) or m1_Gstm1(lgFC:-0.73607FDR:0.035023) or m1_Gstm2(lgFC:-0.31553FDR:0.80509) or m1_Gstm4(lgFC:-0.54065FDR:0.15386) or m1_Gstm5(lgFC:0.12224FDR:0.99096) or m1_Gsto1(lgFC:-0.23FDR:0.86176) or m1_Gsto2(lgFC:0.2068FDR:1) or m…
'm1_HMR_6822'	'm1_noradrenaline[m1_c] => 4 m1_H+[m1_c] + m1_noradrenochrome[m1_c]'	0	0	0	NaN	NaN	'm1_Phenylalanine, tyrosine and tryptophan biosynthesis'	''
'm1_HMR_6823'	'm1_NADPH[m1_c] + m1_noradrenochrome[m1_c] => m1_NADP+[m1_c] + m1_noradrenochrome-O-semiquinone[m1_c]'	0	0	0	NaN	NaN	'm1_Phenylalanine, tyrosine and tryptophan biosynthesis'	'm1_Cryz(lgFC:-0.065698FDR:1)'
'm1_HMR_6824'	'm1_GSH[m1_c] + m1_noradrenochrome[m1_c] => m1_5-S-glutathionyl-noradrenochrome hydroquinone[m1_c]'	0	0	0	NaN	NaN	'm1_Phenylalanine, tyrosine and tryptophan biosynthesis'	'm1_Gm3776(lgFC:0.69634FDR:0.93702) or m1_Gsta1(lgFC:1.043FDR:0.9051) or m1_Gsta2(lgFC:-0.70672FDR:0.64616) or m1_Gsta3(lgFC:-0.58913FDR:0.58625) or m1_Gstk1(lgFC:0.027269FDR:1) or m1_Gstm1(lgFC:-0.73607FDR:0.035023) or m1_Gstm2(lgFC:-0.31553FDR:0.80509) or m1_Gstm4(lgFC:-0.54065FDR:0.15386) or m1_Gstm5(lgFC:0.12224FDR:0.99096) or m1_Gsto1(lgFC:-0.23FDR:0.86176) or m1_Gsto2(lgFC:0.2068FDR:1) or m…
'm1_HMR_6826'	'm1_NADPH[m1_c] + m1_triiodothyronine[m1_c] => m1_3,3-diiodo-L-thyronine[m1_c] + m1_iodide[m1_c] + m1_NADP+[m1_c]'	0	0	0	NaN	NaN	'm1_Phenylalanine, tyrosine and tryptophan biosynthesis'	'm1_Dio1(lgFC:0.42658FDR:0.98923) or m1_Dio2(lgFC:-0.58541FDR:0.99096)'
'm1_HMR_6827'	'm1_NADPH[m1_r] + m1_triiodothyronine[m1_r] => m1_3,3-diiodo-L-thyronine[m1_r] + m1_iodide[m1_r] + m1_NADP+[m1_r]'	0	0	0	NaN	NaN	'm1_Phenylalanine, tyrosine and tryptophan biosynthesis'	'm1_Dio1(lgFC:0.42658FDR:0.98923) or m1_Dio2(lgFC:-0.58541FDR:0.99096)'
'm1_HMR_6828'	'm1_3,3-diiodo-L-thyronine[m1_c] + m1_UDP-glucuronate[m1_c] => m1_3,3-diiodo-L-thyronine-beta-D-glucuronoside[m1_c] + m1_UDP[m1_c]'	0	0	0	NaN	NaN	'm1_Phenylalanine, tyrosine and tryptophan biosynthesis'	'm1_Ugt1a1(lgFC:-0.17454FDR:1) or m1_Ugt1a5(lgFC:-0.46827FDR:0.78747) or m1_Ugt1a6a(lgFC:-0.19486FDR:0.99096) or m1_Ugt1a7c(lgFC:-0.01247FDR:1) or m1_Ugt2a3(lgFC:-0.23824FDR:0.93211) or m1_Ugt2b1(lgFC:-0.81985FDR:0.56842) or m1_Ugt2b34(lgFC:-0.37425FDR:0.99096) or m1_Ugt2b35(lgFC:-0.16759FDR:0.95481) or m1_Ugt2b38(lgFC:-0.61324FDR:0.88496)'
'm1_HMR_6829'	'm1_3,3-diiodo-L-thyronine[m1_c] + m1_PAPS[m1_c] => m1_3,3-diiodo-L-thyronine-4-O-sulfate[m1_c] + m1_PAP[m1_c]'	0	0	0	NaN	NaN	'm1_Phenylalanine, tyrosine and tryptophan biosynthesis'	'm1_Chst2(lgFC:-0.83546FDR:0.49838) or m1_Chst4(lgFC:-0.86132FDR:0.92557) or m1_Chst7(lgFC:-0.69026FDR:0.76893) or m1_Gal3st3(lgFC:1.6994FDR:0.76551) or m1_Gal3st4(lgFC:-18.3629FDR:0.00133) or m1_Hs2st1(lgFC:0.25247FDR:0.33002) or m1_Ndst1(lgFC:-0.21203FDR:0.73249) or m1_Ndst2(lgFC:0.057343FDR:0.99096) or m1_Sult1b1(lgFC:0.68373FDR:0.26715) or m1_Sult1c2(lgFC:-1.2205FDR:0.82195)'
'm1_HMR_6830'	'm1_3,3-diiodo-L-thyronine[m1_r] + m1_UDP-glucuronate[m1_r] => m1_3,3-diiodo-L-thyronine-beta-D-glucuronoside[m1_r] + m1_UDP[m1_r]'	0	0	0	NaN	NaN	'm1_Phenylalanine, tyrosine and tryptophan biosynthesis'	'm1_Ugt1a1(lgFC:-0.17454FDR:1) or m1_Ugt1a5(lgFC:-0.46827FDR:0.78747) or m1_Ugt1a6a(lgFC:-0.19486FDR:0.99096) or m1_Ugt1a7c(lgFC:-0.01247FDR:1) or m1_Ugt2a3(lgFC:-0.23824FDR:0.93211) or m1_Ugt2b1(lgFC:-0.81985FDR:0.56842) or m1_Ugt2b34(lgFC:-0.37425FDR:0.99096) or m1_Ugt2b35(lgFC:-0.16759FDR:0.95481) or m1_Ugt2b38(lgFC:-0.61324FDR:0.88496)'
'm1_HMR_6831'	'm1_3,3-diiodo-L-thyronine-4-O-sulfate[m1_c] + m1_H2O[m1_c] => m1_3,3-diiodo-L-thyronine[m1_c] + m1_sulfate[m1_c]'	0	0	0	NaN	NaN	'm1_Phenylalanine, tyrosine and tryptophan biosynthesis'	''
'm1_HMR_6834'	'm1_NADPH[m1_c] + m1_reverse triiodthyronine[m1_c] <=> m1_3,3-diiodo-L-thyronine[m1_c] + m1_iodide[m1_c] + m1_NADP+[m1_c]'	0	0	0	NaN	NaN	'm1_Phenylalanine, tyrosine and tryptophan biosynthesis'	'm1_Dio1(lgFC:0.42658FDR:0.98923) or m1_Dio2(lgFC:-0.58541FDR:0.99096)'
'm1_HMR_6835'	'm1_NADPH[m1_r] + m1_reverse triiodthyronine[m1_r] <=> m1_3,3-diiodo-L-thyronine[m1_r] + m1_iodide[m1_r] + m1_NADP+[m1_r]'	0	0	0	NaN	NaN	'm1_Phenylalanine, tyrosine and tryptophan biosynthesis'	'm1_Dio1(lgFC:0.42658FDR:0.98923) or m1_Dio2(lgFC:-0.58541FDR:0.99096)'
'm1_HMR_6836'	'm1_reverse triiodthyronine[m1_c] + m1_UDP-glucuronate[m1_c] => m1_3,3,5-triiodo-L-thyronine-beta-D-glucuronoside[m1_c] + m1_UDP[m1_c]'	0	0	0	NaN	NaN	'm1_Phenylalanine, tyrosine and tryptophan biosynthesis'	'm1_Ugt1a1(lgFC:-0.17454FDR:1) or m1_Ugt1a5(lgFC:-0.46827FDR:0.78747) or m1_Ugt1a6a(lgFC:-0.19486FDR:0.99096) or m1_Ugt1a7c(lgFC:-0.01247FDR:1) or m1_Ugt2a3(lgFC:-0.23824FDR:0.93211) or m1_Ugt2b1(lgFC:-0.81985FDR:0.56842) or m1_Ugt2b34(lgFC:-0.37425FDR:0.99096) or m1_Ugt2b35(lgFC:-0.16759FDR:0.95481) or m1_Ugt2b38(lgFC:-0.61324FDR:0.88496)'
'm1_HMR_6837'	'm1_reverse triiodthyronine[m1_r] + m1_UDP-glucuronate[m1_r] => m1_3,3,5-triiodo-L-thyronine-beta-D-glucuronoside[m1_r] + m1_UDP[m1_r]'	0	0	0	NaN	NaN	'm1_Phenylalanine, tyrosine and tryptophan biosynthesis'	'm1_Ugt1a1(lgFC:-0.17454FDR:1) or m1_Ugt1a5(lgFC:-0.46827FDR:0.78747) or m1_Ugt1a6a(lgFC:-0.19486FDR:0.99096) or m1_Ugt1a7c(lgFC:-0.01247FDR:1) or m1_Ugt2a3(lgFC:-0.23824FDR:0.93211) or m1_Ugt2b1(lgFC:-0.81985FDR:0.56842) or m1_Ugt2b34(lgFC:-0.37425FDR:0.99096) or m1_Ugt2b35(lgFC:-0.16759FDR:0.95481) or m1_Ugt2b38(lgFC:-0.61324FDR:0.88496)'
'm1_HMR_6838'	'm1_PAPS[m1_c] + m1_reverse triiodthyronine[m1_c] => m1_3,5,3-triiodothyronine-4-sulfate[m1_c] + m1_PAP[m1_c]'	0	0	0	NaN	NaN	'm1_Phenylalanine, tyrosine and tryptophan biosynthesis'	'm1_Sult1b1(lgFC:0.68373FDR:0.26715) or m1_Sult1c2(lgFC:-1.2205FDR:0.82195)'
'm1_HMR_6839'	'm1_3,5,3-triiodothyronine-4-sulfate[m1_c] + m1_H2O[m1_c] => m1_reverse triiodthyronine[m1_c] + m1_sulfate[m1_c]'	0	0	0	NaN	NaN	'm1_Phenylalanine, tyrosine and tryptophan biosynthesis'	''
'm1_HMR_6840'	'm1_NADPH[m1_c] + m1_triiodothyronine[m1_c] <=> m1_3,5-diiodo-L-thyronine[m1_c] + m1_iodide[m1_c] + m1_NADP+[m1_c]'	0	0	0	NaN	NaN	'm1_Phenylalanine, tyrosine and tryptophan biosynthesis'	'm1_Dio1(lgFC:0.42658FDR:0.98923) or m1_Dio2(lgFC:-0.58541FDR:0.99096)'
'm1_HMR_6841'	'm1_NADPH[m1_r] + m1_triiodothyronine[m1_r] <=> m1_3,5-diiodo-L-thyronine[m1_r] + m1_iodide[m1_r] + m1_NADP+[m1_r]'	0	0	0	NaN	NaN	'm1_Phenylalanine, tyrosine and tryptophan biosynthesis'	'm1_Dio1(lgFC:0.42658FDR:0.98923) or m1_Dio2(lgFC:-0.58541FDR:0.99096)'
'm1_HMR_6842'	'm1_3,5-diiodo-L-thyronine[m1_c] + m1_UDP-glucuronate[m1_c] => m1_3,5-diiodo-L-thyronine-beta-D-glucuronoside[m1_c] + m1_UDP[m1_c]'	0	0	0	NaN	NaN	'm1_Phenylalanine, tyrosine and tryptophan biosynthesis'	'm1_Ugt1a1(lgFC:-0.17454FDR:1) or m1_Ugt1a5(lgFC:-0.46827FDR:0.78747) or m1_Ugt1a6a(lgFC:-0.19486FDR:0.99096) or m1_Ugt1a7c(lgFC:-0.01247FDR:1) or m1_Ugt2a3(lgFC:-0.23824FDR:0.93211) or m1_Ugt2b1(lgFC:-0.81985FDR:0.56842) or m1_Ugt2b34(lgFC:-0.37425FDR:0.99096) or m1_Ugt2b35(lgFC:-0.16759FDR:0.95481) or m1_Ugt2b38(lgFC:-0.61324FDR:0.88496)'
'm1_HMR_6843'	'm1_3,5-diiodo-L-thyronine[m1_r] + m1_UDP-glucuronate[m1_r] => m1_3,5-diiodo-L-thyronine-beta-D-glucuronoside[m1_r] + m1_UDP[m1_r]'	0	0	0	NaN	NaN	'm1_Phenylalanine, tyrosine and tryptophan biosynthesis'	'm1_Ugt1a1(lgFC:-0.17454FDR:1) or m1_Ugt1a5(lgFC:-0.46827FDR:0.78747) or m1_Ugt1a6a(lgFC:-0.19486FDR:0.99096) or m1_Ugt1a7c(lgFC:-0.01247FDR:1) or m1_Ugt2a3(lgFC:-0.23824FDR:0.93211) or m1_Ugt2b1(lgFC:-0.81985FDR:0.56842) or m1_Ugt2b34(lgFC:-0.37425FDR:0.99096) or m1_Ugt2b35(lgFC:-0.16759FDR:0.95481) or m1_Ugt2b38(lgFC:-0.61324FDR:0.88496)'
'm1_HMR_6844'	'm1_3,5-diiodo-L-thyronine[m1_c] + m1_PAPS[m1_c] => m1_3,5-diiodo-L-thyronine-4-O-sulfate[m1_c] + m1_PAP[m1_c]'	0	0	0	NaN	NaN	'm1_Phenylalanine, tyrosine and tryptophan biosynthesis'	'm1_Sult1b1(lgFC:0.68373FDR:0.26715) or m1_Sult1c2(lgFC:-1.2205FDR:0.82195)'
'm1_HMR_6845'	'm1_3,5-diiodo-L-thyronine-4-O-sulfate[m1_c] + m1_H2O[m1_c] => m1_3,5-diiodo-L-thyronine[m1_c] + m1_sulfate[m1_c]'	0	0	0	NaN	NaN	'm1_Phenylalanine, tyrosine and tryptophan biosynthesis'	''
'm1_HMR_6849'	'm1_3,5-diiodo-L-thyronine[m1_r] + m1_NADPH[m1_r] <=> m1_3-monoiodo-L-thyronine[m1_r] + m1_iodide[m1_r] + m1_NADP+[m1_r]'	0	0	0	NaN	NaN	'm1_Phenylalanine, tyrosine and tryptophan biosynthesis'	'm1_Dio1(lgFC:0.42658FDR:0.98923) or m1_Dio2(lgFC:-0.58541FDR:0.99096)'
'm1_HMR_6850'	'm1_3-monoiodo-L-thyronine[m1_c] + m1_PAPS[m1_c] => m1_3-monoiodo-L-thyronine-4-O-sulfate[m1_c] + m1_PAP[m1_c]'	0	0	0	NaN	NaN	'm1_Phenylalanine, tyrosine and tryptophan biosynthesis'	'm1_Sult1b1(lgFC:0.68373FDR:0.26715) or m1_Sult1c2(lgFC:-1.2205FDR:0.82195)'
'm1_HMR_6851'	'm1_3-monoiodo-L-thyronine-4-O-sulfate[m1_c] + m1_H2O[m1_c] => m1_3-monoiodo-L-thyronine[m1_c] + m1_sulfate[m1_c]'	0	0	0	NaN	NaN	'm1_Phenylalanine, tyrosine and tryptophan biosynthesis'	''
'm1_HMR_6854'	'm1_NADPH[m1_c] + m1_thyroxine[m1_c] <=> m1_iodide[m1_c] + m1_NADP+[m1_c] + m1_triiodothyronine[m1_c]'	0	0	0	NaN	NaN	'm1_Phenylalanine, tyrosine and tryptophan biosynthesis'	'm1_Dio1(lgFC:0.42658FDR:0.98923) or m1_Dio2(lgFC:-0.58541FDR:0.99096)'
'm1_HMR_6855'	'm1_NADPH[m1_r] + m1_thyroxine[m1_r] <=> m1_iodide[m1_r] + m1_NADP+[m1_r] + m1_triiodothyronine[m1_r]'	0	0	0	NaN	NaN	'm1_Phenylalanine, tyrosine and tryptophan biosynthesis'	'm1_Dio1(lgFC:0.42658FDR:0.98923) or m1_Dio2(lgFC:-0.58541FDR:0.99096)'
'm1_HMR_6874'	'm1_O2[m1_c] + m1_tyrosine[m1_c] => m1_H2O[m1_c] + m1_L-dopaquinone[m1_c]'	0	0	0	NaN	NaN	'm1_Phenylalanine, tyrosine and tryptophan biosynthesis'	''
'm1_HMR_6875'	'm1_2-carboxy-2,3-dihydro-5,6-dihydroxyindole[m1_c] <=> m1_L-dopaquinone[m1_c]'	0	0	0	NaN	NaN	'm1_Phenylalanine, tyrosine and tryptophan biosynthesis'	''
'm1_HMR_6876'	'm1_2-carboxy-2,3-dihydro-5,6-dihydroxyindole[m1_c] + m1_L-dopaquinone[m1_c] <=> m1_L-dopa[m1_c] + m1_L-dopachrome[m1_c]'	0	0	0	NaN	NaN	'm1_Phenylalanine, tyrosine and tryptophan biosynthesis'	''
'm1_HMR_6877'	'm1_5-S-cysteinyldopa[m1_c] <=> m1_cysteine[m1_c] + m1_L-dopaquinone[m1_c]'	0	0	0	NaN	NaN	'm1_Phenylalanine, tyrosine and tryptophan biosynthesis'	''
'm1_HMR_6879'	'm1_1,4-benzothiazine-O-quinonimine[m1_c] + m1_H2O[m1_c] <=> m1_5-(S-L-cysteinyl)-dopaquinone[m1_c]'	0	0	0	NaN	NaN	'm1_Phenylalanine, tyrosine and tryptophan biosynthesis'	''
'm1_HMR_6880'	'm1_1,4-benzothiazine-O-quinonimine[m1_c] + m1_5-S-cysteinyldopa[m1_c] <=> m1_3,4-dihydro-1,4-benzothiazine-3-carboxylate[m1_c] + m1_5-(S-L-cysteinyl)-dopaquinone[m1_c]'	0	0	0	NaN	NaN	'm1_Phenylalanine, tyrosine and tryptophan biosynthesis'	''
'm1_HMR_6881'	'm1_3,4-dihydro-1,4-benzothiazine-3-carboxylate[m1_c] => m1_benzothiazine[m1_c] + m1_CO2[m1_c] + 2 m1_H+[m1_c]'	0	0	0	NaN	NaN	'm1_Phenylalanine, tyrosine and tryptophan biosynthesis'	''
'm1_HMR_6882'	'm1_3,5-dihydroxy-3,4-dihydro-1,4-benzothiazine[m1_c] <=> m1_benzothiazine[m1_c] + m1_H2O[m1_c]'	0	0	0	NaN	NaN	'm1_Phenylalanine, tyrosine and tryptophan biosynthesis'	''
'm1_HMR_6883'	'm1_GSH[m1_c] + m1_L-dopaquinone[m1_c] => m1_5-S-glutathionyl-L-dopa[m1_c]'	0	0	0	NaN	NaN	'm1_Phenylalanine, tyrosine and tryptophan biosynthesis'	'm1_Gm3776(lgFC:0.69634FDR:0.93702) or m1_Gsta1(lgFC:1.043FDR:0.9051) or m1_Gsta2(lgFC:-0.70672FDR:0.64616) or m1_Gsta3(lgFC:-0.58913FDR:0.58625) or m1_Gstk1(lgFC:0.027269FDR:1) or m1_Gstm1(lgFC:-0.73607FDR:0.035023) or m1_Gstm2(lgFC:-0.31553FDR:0.80509) or m1_Gstm4(lgFC:-0.54065FDR:0.15386) or m1_Gstm5(lgFC:0.12224FDR:0.99096) or m1_Gsto1(lgFC:-0.23FDR:0.86176) or m1_Gsto2(lgFC:0.2068FDR:1) or m…
'm1_HMR_6885'	'm1_L-dopachrome[m1_c] + m1_NADPH[m1_c] => m1_dopachrome-O-semiquinone[m1_c] + m1_NADP+[m1_c]'	0	0	0	NaN	NaN	'm1_Phenylalanine, tyrosine and tryptophan biosynthesis'	'm1_Cryz(lgFC:-0.065698FDR:1)'
'm1_HMR_6886'	'm1_GSH[m1_c] + m1_L-dopachrome[m1_c] => m1_5-S-glutathionyl-dopachrome hydroquinone[m1_c]'	0	0	0	NaN	NaN	'm1_Phenylalanine, tyrosine and tryptophan biosynthesis'	'm1_Gm3776(lgFC:0.69634FDR:0.93702) or m1_Gsta1(lgFC:1.043FDR:0.9051) or m1_Gsta2(lgFC:-0.70672FDR:0.64616) or m1_Gsta3(lgFC:-0.58913FDR:0.58625) or m1_Gstk1(lgFC:0.027269FDR:1) or m1_Gstm1(lgFC:-0.73607FDR:0.035023) or m1_Gstm2(lgFC:-0.31553FDR:0.80509) or m1_Gstm4(lgFC:-0.54065FDR:0.15386) or m1_Gstm5(lgFC:0.12224FDR:0.99096) or m1_Gsto1(lgFC:-0.23FDR:0.86176) or m1_Gsto2(lgFC:0.2068FDR:1) or m…
'm1_HMR_6888'	'm1_L-dopachrome[m1_c] => m1_5,6-dihydroxyindole-2-carboxylate[m1_c]'	0	0	0	NaN	NaN	'm1_Phenylalanine, tyrosine and tryptophan biosynthesis'	'm1_Dct(lgFC:-0.42824FDR:0.86581)'
'm1_HMR_6889'	'm1_5,6-dihydroxyindole-2-carboxylate[m1_c] + m1_O2[m1_c] => m1_5,6-indolequinone-2-carboxylate[m1_c] + m1_H2O2[m1_c]'	0	0	0	NaN	NaN	'm1_Phenylalanine, tyrosine and tryptophan biosynthesis'	''
'm1_HMR_7628'	'm1_O2[m1_c] + m1_phenylalanine[m1_c] => m1_2-phenylacetamide[m1_c] + m1_CO2[m1_c] + m1_H2O[m1_c]'	0	0	0	NaN	NaN	'm1_Phenylalanine, tyrosine and tryptophan biosynthesis'	'm1_Prdx6(lgFC:-0.17512FDR:0.82761) or m1_Pxdn(lgFC:-0.36541FDR:0.93689)'
'm1_HMR_7756'	'm1_2-phenylacetamide[m1_c] + m1_H2O[m1_c] => m1_NH3[m1_c] + m1_phenylacetate[m1_c]'	0	0	0	NaN	NaN	'm1_Phenylalanine, tyrosine and tryptophan biosynthesis'	''
'm1_HMR_8539'	'm1_O2[m1_c] + m1_phenylalanine[m1_c] + m1_tetrahydrobiopterin[m1_c] => m1_4alpha-hydroxytetrahydrobiopterin[m1_c] + m1_tyrosine[m1_c]'	0	0	0	NaN	NaN	'm1_Phenylalanine, tyrosine and tryptophan biosynthesis'	'm1_Pah(lgFC:-0.17098FDR:1)'
'm1_HMR_8794'	'm1_ATP[m1_c] + m1_CoA[m1_c] + m1_phenylacetate[m1_c] => m1_AMP[m1_c] + m1_phenylacetyl-CoA[m1_c] + m1_PPi[m1_c]'	0	0	0	NaN	NaN	'm1_Phenylalanine, tyrosine and tryptophan biosynthesis'	''
'm1_HMR_8795'	'm1_glutamine[m1_c] + m1_phenylacetyl-CoA[m1_c] => m1_CoA[m1_c] + m1_phenylacetylglutamine[m1_c]'	0	0	0	NaN	NaN	'm1_Phenylalanine, tyrosine and tryptophan biosynthesis'	''
'm1_HMR_8796'	'm1_glycine[m1_c] + m1_phenylacetyl-CoA[m1_c] => m1_CoA[m1_c] + m1_phenylacetylglycine[m1_c]'	0	0	0	NaN	NaN	'm1_Phenylalanine, tyrosine and tryptophan biosynthesis'	'm1_Glyat(lgFC:-0.11684FDR:1)'
'm1_HMR_3875'	'm1_ATP[m1_c] + m1_H2O[m1_c] + m1_methionine[m1_c] => m1_Pi[m1_c] + m1_PPi[m1_c] + m1_SAM[m1_c]'	0.00088172	0.000102454	0.000984174	1.09529	0.000965736	'm1_Cysteine and methionine metabolism'	'm1_Mat1a(lgFC:0.97666FDR:0.71092) or m1_Mat2a(lgFC:0.1194FDR:0.92979) or m1_Mat2b(lgFC:-0.0093659FDR:1)'
'm1_HMR_3877'	'm1_H2O[m1_c] + m1_SAH[m1_c] => m1_adenosine[m1_c] + m1_homocysteine[m1_c]'	0.00088172	0.000102454	0.000984174	1.0118	0.000892126	'm1_Cysteine and methionine metabolism'	'm1_Ahcy(lgFC:0.16977FDR:0.83812) or m1_Ahcyl1(lgFC:-0.018677FDR:1) or m1_Ahcyl2(lgFC:0.25505FDR:0.92145)'
'm1_HMR_3879'	'm1_homocysteine[m1_c] + m1_serine[m1_c] => m1_H2O[m1_c] + m1_L-cystathionine[m1_c]'	0.00088172	0	0.00088172	0.974137	0.000858916	'm1_Cysteine and methionine metabolism'	'm1_Cbs(lgFC:-0.32487FDR:0.87173)'
'm1_HMR_3881'	'm1_H2O[m1_c] + m1_L-cystathionine[m1_c] => m1_2-oxobutyrate[m1_c] + m1_cysteine[m1_c] + m1_NH3[m1_c]'	0.00088172	0	0.00088172	1	0.00088172	'm1_Cysteine and methionine metabolism'	'm1_Cth(lgFC:-0.072465FDR:1)'
'm1_HMR_3912'	'm1_AKG[m1_c] + m1_cysteine[m1_c] <=> m1_glutamate[m1_c] + m1_mercaptopyruvate[m1_c]'	0.180275	0.180288	0.360563	NaN	0.181481	'm1_Cysteine and methionine metabolism'	'm1_Got1(lgFC:0.17494FDR:0.98301) or m1_Got2(lgFC:0.26533FDR:0.94457)'
'm1_HMR_3917'	'm1_5-methyl-THF[m1_c] + m1_homocysteine[m1_c] => m1_methionine[m1_c] + m1_THF[m1_c]'	0	0	0	NaN	NaN	'm1_Cysteine and methionine metabolism'	'm1_Mtr(lgFC:-0.27685FDR:0.46803)'
'm1_HMR_3919'	'm1_H2O[m1_c] + m1_N-acetylmethionine[m1_c] <=> m1_acetate[m1_c] + m1_methionine[m1_c]'	0	0	0	NaN	0	'm1_Cysteine and methionine metabolism'	'm1_Acy1(lgFC:-0.53202FDR:0.40886)'
'm1_HMR_3920'	'm1_H2O[m1_c] + m1_homocysteine-thiolactone[m1_c] <=> m1_homocysteine[m1_c]'	0	0	0	NaN	NaN	'm1_Cysteine and methionine metabolism'	'm1_Pon1(lgFC:-0.1379FDR:1) or m1_Pon2(lgFC:0.01566FDR:1) or m1_Pon3(lgFC:-0.18452FDR:0.91818)'
'm1_HMR_3922'	'm1_CoA[m1_m] + m1_N-acetyl-L-cystathionine[m1_m] <=> m1_acetyl-CoA[m1_m] + m1_L-cystathionine[m1_m]'	0	0	0	NaN	NaN	'm1_Cysteine and methionine metabolism'	'm1_Nags(lgFC:-0.0895FDR:0.98278)'
'm1_HMR_3928'	'm1_mercaptopyruvate[m1_c] + m1_sulfite[m1_c] => m1_H2S2O3[m1_c] + m1_pyruvate[m1_c]'	0.180275	0.180288	0.360563	NaN	0.180288	'm1_Cysteine and methionine metabolism'	'm1_Mpst(lgFC:0.076735FDR:0.99731)'
'm1_HMR_3995'	'm1_cystine[m1_c] + m1_H+[m1_c] + m1_NADPH[m1_c] => 2 m1_cysteine[m1_c] + m1_NADP+[m1_c]'	0	0	0	NaN	NaN	'm1_Cysteine and methionine metabolism'	'm1_Txnrd1(lgFC:-0.075994FDR:0.97204) or m1_Txnrd2(lgFC:-0.037219FDR:1) or m1_Txnrd3(lgFC:-0.13103FDR:0.92145)'
'm1_HMR_3996'	'm1_cystine[m1_c] + m1_H+[m1_c] + m1_NADH[m1_c] => 2 m1_cysteine[m1_c] + m1_NAD+[m1_c]'	0.05618	0.05618	0.11236	NaN	NaN	'm1_Cysteine and methionine metabolism'	''
'm1_HMR_4072'	'm1_DNA[m1_c] + m1_SAM[m1_c] => m1_DNA-5-methylcytosine[m1_c] + m1_H+[m1_c] + m1_SAH[m1_c]'	0	0	0	NaN	NaN	'm1_Cysteine and methionine metabolism'	'm1_Dnmt3a(lgFC:0.12688FDR:0.86143) or m1_Trdmt1(lgFC:0.4145FDR:0.54566)'
'm1_HMR_4189'	'm1_H2O[m1_m] + m1_O2[m1_m] + m1_sulfite[m1_m] => m1_H2O2[m1_m] + m1_sulfate[m1_m]'	0	0	0	NaN	NaN	'm1_Cysteine and methionine metabolism'	'm1_Suox(lgFC:0.25421FDR:0.9152)'
'm1_HMR_4302'	'm1_cysteine[m1_c] + m1_H2O[m1_c] => m1_H2S[m1_c] + m1_NH3[m1_c] + m1_pyruvate[m1_c]'	0	0	0	NaN	NaN	'm1_Cysteine and methionine metabolism'	'm1_Cth(lgFC:-0.072465FDR:1)'
'm1_HMR_4323'	'm1_H2S[m1_c] + m1_serine[m1_c] => m1_cysteine[m1_c] + m1_H2O[m1_c]'	0.180275	0	0.180275	NaN	0.175612	'm1_Cysteine and methionine metabolism'	'm1_Cbs(lgFC:-0.32487FDR:0.87173)'
'm1_HMR_5381'	'm1_PAPS[m1_c] + m1_thioredoxin[m1_c] => m1_oxidized thioredoxin[m1_c] + m1_PAP[m1_c] + m1_sulfite[m1_c]'	0	0	0	NaN	NaN	'm1_Cysteine and methionine metabolism'	''
'm1_HMR_5385'	'm1_methylthioribose-1p[m1_c] => m1_S-methyl-5-thio-D-ribulose-1-phosphate[m1_c]'	0	0	0	NaN	NaN	'm1_Cysteine and methionine metabolism'	'm1_Mri1(lgFC:0.15476FDR:0.89464)'
'm1_HMR_5386'	'm1_S-methyl-5-thio-D-ribulose-1-phosphate[m1_c] => m1_2,3-diketo-5-methylthiopentyl-1-phosphate[m1_c] + m1_H2O[m1_c]'	0	0	0	NaN	NaN	'm1_Cysteine and methionine metabolism'	'm1_Apip(lgFC:0.070636FDR:0.99096)'
'm1_HMR_5387'	'm1_2,3-diketo-5-methylthiopentyl-1-phosphate[m1_c] + m1_H2O[m1_c] => m1_1,2-dihydroxy-5-(methylthio)pent-1-en-3-one[m1_c] + m1_Pi[m1_c]'	0	0	0	NaN	NaN	'm1_Cysteine and methionine metabolism'	'm1_Enoph1(lgFC:-0.18591FDR:0.92597)'
'm1_HMR_5388'	'm1_1,2-dihydroxy-5-(methylthio)pent-1-en-3-one[m1_c] + m1_O2[m1_c] => m1_3-(methylthio)propionic acid[m1_c] + m1_CO[m1_c] + m1_formate[m1_c]'	0	0	0	NaN	NaN	'm1_Cysteine and methionine metabolism'	'm1_Adi1(lgFC:-0.17042FDR:0.93007)'
'm1_HMR_5389'	'm1_1,2-dihydroxy-5-(methylthio)pent-1-en-3-one[m1_c] + m1_O2[m1_c] => m1_4-methylthio-2-oxobutanoic acid[m1_c] + m1_formate[m1_c]'	0	0	0	NaN	NaN	'm1_Cysteine and methionine metabolism'	'm1_Adi1(lgFC:-0.17042FDR:0.93007)'
'm1_HMR_5390'	'm1_H2O[m1_c] + m1_methionine[m1_c] + m1_O2[m1_c] => m1_4-methylthio-2-oxobutanoic acid[m1_c] + m1_H2O2[m1_c] + m1_NH3[m1_c]'	0	0.62207	0.62207	NaN	NaN	'm1_Cysteine and methionine metabolism'	''
'm1_HMR_5391'	'm1_4-methylthio-2-oxobutanoic acid[m1_c] + m1_glutamate[m1_c] => m1_AKG[m1_c] + m1_methionine[m1_c]'	0	0	0	NaN	NaN	'm1_Cysteine and methionine metabolism'	'm1_Tat(lgFC:0.1225FDR:1)'
'm1_HMR_5418'	'm1_CoA[m1_m] + m1_N-acetylmethionine[m1_m] <=> m1_acetyl-CoA[m1_m] + m1_methionine[m1_m]'	0	0	0	NaN	NaN	'm1_Cysteine and methionine metabolism'	'm1_Nags(lgFC:-0.0895FDR:0.98278)'
'm1_HMR_5419'	'm1_CoA[m1_m] + m1_N-acetyl-L-cysteine[m1_m] <=> m1_acetyl-CoA[m1_m] + m1_cysteine[m1_m]'	0	0	0	NaN	NaN	'm1_Cysteine and methionine metabolism'	'm1_Nags(lgFC:-0.0895FDR:0.98278)'
'm1_HMR_6515'	'm1_mercaptopyruvate[m1_c] + m1_sulfite[m1_c] => m1_pyruvate[m1_c] + m1_thiosulfate[m1_c]'	0	0	0	NaN	NaN	'm1_Cysteine and methionine metabolism'	'm1_Mpst(lgFC:0.076735FDR:0.99731)'
'm1_HMR_6518'	'm1_hydrogen-cyanide[m1_c] + m1_mercaptopyruvate[m1_c] => m1_pyruvate[m1_c] + m1_thiocyanate[m1_c]'	0	0	0	NaN	NaN	'm1_Cysteine and methionine metabolism'	'm1_Mpst(lgFC:0.076735FDR:0.99731)'
'm1_HMR_6519'	'm1_3-mercaptolactate[m1_c] + m1_NAD+[m1_c] <=> m1_H+[m1_c] + m1_mercaptopyruvate[m1_c] + m1_NADH[m1_c]'	0	0	0	NaN	NaN	'm1_Cysteine and methionine metabolism'	'm1_Htt(lgFC:-0.085968FDR:0.96613) or m1_Ldhb(lgFC:0.00079359FDR:1)'
'm1_HMR_6520'	'm1_hydrogen-cyanide[m1_m] + m1_thiosulfate[m1_m] => m1_sulfite[m1_m] + m1_thiocyanate[m1_m]'	0	0	0	NaN	NaN	'm1_Cysteine and methionine metabolism'	'm1_Mpst(lgFC:0.076735FDR:0.99731)'
'm1_HMR_8062'	'm1_dehydroalanine[m1_c] + m1_H+[m1_c] + m1_NADPH[m1_c] + m1_PAPS[m1_c] => m1_L-cysteate[m1_c] + m1_NADP+[m1_c] + m1_PAP[m1_c]'	0	0	0	NaN	NaN	'm1_Cysteine and methionine metabolism'	''
'm1_HMR_8066'	'm1_3-sulfopyruvate[m1_c] + m1_glutamate[m1_c] <=> m1_AKG[m1_c] + m1_L-cysteate[m1_c]'	0	0	0	NaN	NaN	'm1_Cysteine and methionine metabolism'	'm1_Got1(lgFC:0.17494FDR:0.98301) or m1_Got2(lgFC:0.26533FDR:0.94457)'
'm1_HMR_8067'	'm1_3-sulfopyruvate[m1_m] + m1_glutamate[m1_m] <=> m1_AKG[m1_m] + m1_L-cysteate[m1_m]'	0	0	0	NaN	NaN	'm1_Cysteine and methionine metabolism'	'm1_Got2(lgFC:0.26533FDR:0.94457)'
'm1_HMR_8068'	'm1_(S)-3-sulfolactate[m1_c] + m1_NAD+[m1_c] <=> m1_3-sulfopyruvate[m1_c] + m1_H+[m1_c] + m1_NADH[m1_c]'	0	0	0	NaN	NaN	'm1_Cysteine and methionine metabolism'	'm1_Mdh1(lgFC:-0.066553FDR:1)'
'm1_HMR_8069'	'm1_(S)-3-sulfolactate[m1_m] + m1_NAD+[m1_m] <=> m1_3-sulfopyruvate[m1_m] + m1_H+[m1_m] + m1_NADH[m1_m]'	0	0	0	NaN	NaN	'm1_Cysteine and methionine metabolism'	'm1_Mdh2(lgFC:0.033792FDR:1)'
'm1_HMR_8641'	'm1_DNA[m1_n] + m1_SAM[m1_n] => m1_DNA-5-methylcytosine[m1_n] + m1_H+[m1_n] + m1_SAH[m1_n]'	0	0	0	NaN	NaN	'm1_Cysteine and methionine metabolism'	'm1_Dnmt3a(lgFC:0.12688FDR:0.86143) or m1_Trdmt1(lgFC:0.4145FDR:0.54566)'
'm1_HMR_8682'	'm1_cystine[m1_c] + 2 m1_GSH[m1_c] => 2 m1_cysteine[m1_c] + m1_GSSG[m1_c]'	0	0	0	NaN	NaN	'm1_Cysteine and methionine metabolism'	''
'm1_HMR_8684'	'm1_AKG[m1_m] + m1_cysteine[m1_m] <=> m1_glutamate[m1_m] + m1_mercaptopyruvate[m1_m]'	0	0	0	NaN	NaN	'm1_Cysteine and methionine metabolism'	'm1_Got2(lgFC:0.26533FDR:0.94457)'
'm1_HMR_9869'	'm1_mercaptopyruvate[m1_m] + m1_sulfite[m1_m] => m1_pyruvate[m1_m] + m1_thiosulfate[m1_m]'	0	0	0	NaN	NaN	'm1_Cysteine and methionine metabolism'	'm1_Mpst(lgFC:0.076735FDR:0.99731)'
'm1_HMR_8685'	'm1_3-mercaptolactate[m1_c] + m1_cysteine[m1_c] + m1_NAD+[m1_c] => m1_3-mercaptolactate-cysteine-disulfide[m1_c] + m1_H+[m1_c] + m1_NADH[m1_c]'	0	0	0	NaN	NaN	'm1_Cysteine and methionine metabolism'	''
'm1_HMR_4118'	'm1_GSSG[m1_c] + m1_H+[m1_c] + m1_NADPH[m1_c] => 2 m1_GSH[m1_c] + m1_NADP+[m1_c]'	0	0	0	NaN	NaN	'm1_Alanine, aspartate and glutamate metabolism'	'm1_Gsr(lgFC:0.10483FDR:0.86617)'
'm1_HMR_3870'	'm1_GSSG[m1_m] + m1_H+[m1_m] + m1_NADPH[m1_m] => 2 m1_GSH[m1_m] + m1_NADP+[m1_m]'	0	0	0	NaN	NaN	'm1_Alanine, aspartate and glutamate metabolism'	'm1_Gsr(lgFC:0.10483FDR:0.86617)'
'm1_HMR_4116'	'2 m1_GSH[m1_c] + m1_H2O2[m1_c] => m1_GSSG[m1_c] + 2 m1_H2O[m1_c]'	0	0	0	NaN	NaN	'm1_Glutathione metabolism'	'm1_Gpx1(lgFC:-0.35526FDR:0.67819) or m1_Gpx3(lgFC:0.6378FDR:0.32149) or m1_Gpx4(lgFC:-0.19532FDR:0.80509) or m1_Gpx6(lgFC:-0.1231FDR:1) or m1_Gpx7(lgFC:-0.12106FDR:0.99256) or m1_Prdx1(lgFC:-0.16455FDR:0.71142) or m1_Prdx2(lgFC:-0.12646FDR:0.77744) or m1_Prdx3(lgFC:0.016775FDR:1) or m1_Prdx6(lgFC:-0.17512FDR:0.82761)'
'm1_HMR_4120'	'2 m1_GSH[m1_s] + m1_H2O2[m1_s] => m1_GSSG[m1_s] + 2 m1_H2O[m1_s]'	0	0	0	NaN	NaN	'm1_Glutathione metabolism'	'm1_Gpx1(lgFC:-0.35526FDR:0.67819) or m1_Gpx3(lgFC:0.6378FDR:0.32149) or m1_Gpx4(lgFC:-0.19532FDR:0.80509) or m1_Gpx6(lgFC:-0.1231FDR:1) or m1_Gpx7(lgFC:-0.12106FDR:0.99256) or m1_Prdx1(lgFC:-0.16455FDR:0.71142) or m1_Prdx2(lgFC:-0.12646FDR:0.77744) or m1_Prdx3(lgFC:0.016775FDR:1) or m1_Prdx6(lgFC:-0.17512FDR:0.82761)'
'm1_HMR_4121'	'2 m1_GSH[m1_m] + m1_H2O2[m1_m] => m1_GSSG[m1_m] + 2 m1_H2O[m1_m]'	0	0	0	NaN	NaN	'm1_Glutathione metabolism'	'm1_Gpx1(lgFC:-0.35526FDR:0.67819) or m1_Gpx3(lgFC:0.6378FDR:0.32149) or m1_Gpx4(lgFC:-0.19532FDR:0.80509) or m1_Gpx6(lgFC:-0.1231FDR:1) or m1_Gpx7(lgFC:-0.12106FDR:0.99256) or m1_Prdx1(lgFC:-0.16455FDR:0.71142) or m1_Prdx2(lgFC:-0.12646FDR:0.77744) or m1_Prdx3(lgFC:0.016775FDR:1) or m1_Prdx6(lgFC:-0.17512FDR:0.82761)'
'm1_HMR_3889'	'm1_5-oxoproline[m1_c] + m1_ATP[m1_c] + 2 m1_H2O[m1_c] => m1_ADP[m1_c] + m1_glutamate[m1_c] + m1_Pi[m1_c]'	0	0	0	NaN	NaN	'm1_Glutathione metabolism'	'm1_Oplah(lgFC:0.22541FDR:0.91221)'
'm1_HMR_3933'	'm1_hydroxymethylglutathione[m1_c] + m1_NAD+[m1_c] => m1_formylglutathione[m1_c] + m1_H+[m1_c] + m1_NADH[m1_c]'	0	0	0	NaN	NaN	'm1_Glutathione metabolism'	'm1_Adh5(lgFC:-0.021378FDR:1)'
'm1_HMR_3937'	'm1_formylglutathione[m1_c] + m1_H2O[m1_c] => m1_formate[m1_c] + m1_GSH[m1_c]'	0	0	0	NaN	NaN	'm1_Glutathione metabolism'	'm1_Esd(lgFC:-0.1622FDR:0.68416)'
'm1_HMR_4175'	'm1_GSH[m1_c] + m1_H2O[m1_c] => m1_cys-gly[m1_c] + m1_glutamate[m1_c]'	0	0	0	NaN	NaN	'm1_Glutathione metabolism'	'm1_Ggt1(lgFC:-0.65445FDR:1) or m1_Ggt5(lgFC:0.34707FDR:0.96864) or m1_Ggt6(lgFC:-0.12192FDR:0.99256) or m1_Ggt7(lgFC:0.87617FDR:0.91533)'
'm1_HMR_4176'	'm1_GSH[m1_s] + m1_H2O[m1_s] => m1_cys-gly[m1_s] + m1_glutamate[m1_s]'	0	0	0	NaN	NaN	'm1_Glutathione metabolism'	'm1_Ggt1(lgFC:-0.65445FDR:1) or m1_Ggt5(lgFC:0.34707FDR:0.96864) or m1_Ggt6(lgFC:-0.12192FDR:0.99256) or m1_Ggt7(lgFC:0.87617FDR:0.91533)'
'm1_HMR_4326'	'm1_ATP[m1_c] + m1_gamma-glutamyl-cysteine[m1_c] + m1_glycine[m1_c] => m1_ADP[m1_c] + m1_GSH[m1_c] + m1_Pi[m1_c]'	0	0	0	NaN	NaN	'm1_Glutathione metabolism'	'm1_Gss(lgFC:0.083068FDR:0.95452)'
'm1_HMR_4324'	'm1_ATP[m1_c] + m1_cysteine[m1_c] + m1_glutamate[m1_c] => m1_ADP[m1_c] + m1_gamma-glutamyl-cysteine[m1_c] + m1_Pi[m1_c]'	0	0	0	NaN	NaN	'm1_Glutathione metabolism'	'm1_Gclc(lgFC:-0.37271FDR:0.37779) or m1_Gclm(lgFC:-0.041275FDR:1)'
'm1_HMR_4708'	'm1_gamma-glutamyl-cysteine[m1_c] => m1_5-oxoproline[m1_c] + m1_cysteine[m1_c]'	0	0	0	NaN	NaN	'm1_Glutathione metabolism'	'm1_Ggct(lgFC:0.10869FDR:1)'
'm1_HMR_4328'	'm1_cys-gly[m1_c] + m1_H2O[m1_c] => m1_cysteine[m1_c] + m1_glycine[m1_c]'	0	0	0	NaN	NaN	'm1_Glutathione metabolism'	'm1_Anpep(lgFC:-0.13335FDR:0.98278) or m1_Lap3(lgFC:-0.24396FDR:0.95003) or m1_Npepps(lgFC:-0.1312FDR:0.87173)'
'm1_HMR_4329'	'm1_cys-gly[m1_s] + m1_H2O[m1_s] => m1_cysteine[m1_s] + m1_glycine[m1_s]'	0	0	0	NaN	NaN	'm1_Glutathione metabolism'	'm1_Anpep(lgFC:-0.13335FDR:0.98278) or m1_Lap3(lgFC:-0.24396FDR:0.95003) or m1_Npepps(lgFC:-0.1312FDR:0.87173)'
'm1_HMR_4937'	'm1_alanine[m1_c] + m1_GSH[m1_c] => m1_cys-gly[m1_c] + m1_gamma-L-glutamyl-L-alanine[m1_c]'	0	0	0	NaN	NaN	'm1_Glycine, serine and threonine metabolism'	'm1_Ggt1(lgFC:-0.65445FDR:1) or m1_Ggt5(lgFC:0.34707FDR:0.96864) or m1_Ggt6(lgFC:-0.12192FDR:0.99256) or m1_Ggt7(lgFC:0.87617FDR:0.91533)'
'm1_HMR_8770'	'm1_gamma-L-glutamyl-L-alanine[m1_c] => m1_5-oxoproline[m1_c] + m1_alanine[m1_c]'	0	0	0	NaN	NaN	'm1_Glutathione metabolism'	'm1_Ggct(lgFC:0.10869FDR:1)'
'm1_HMR_8769'	'm1_alanine[m1_s] + m1_GSH[m1_s] => m1_(5-L-glutamyl)-L-amino acid[m1_s] + m1_cys-gly[m1_s]'	0	0	0	NaN	NaN	'm1_Glutathione metabolism'	'm1_Ggt1(lgFC:-0.65445FDR:1) or m1_Ggt5(lgFC:0.34707FDR:0.96864) or m1_Ggt6(lgFC:-0.12192FDR:0.99256) or m1_Ggt7(lgFC:0.87617FDR:0.91533)'
'm1_HMR_8771'	'm1_ATP[m1_c] + m1_GSH[m1_c] + m1_H2O[m1_c] => m1_ADP[m1_c] + m1_GSH[m1_m] + m1_Pi[m1_c]'	0	0	0	NaN	NaN	'm1_Glutathione metabolism'	''
'm1_HMR_4078'	'm1_H2O[m1_c] + m1_O2[m1_c] + m1_spermine[m1_c] => m1_3-amino-propanal[m1_c] + m1_H2O2[m1_c] + m1_spermidine[m1_c]'	0	0	0	NaN	NaN	'm1_beta-Alanine metabolism'	''
'm1_HMR_4174'	'm1_aspartate[m1_c] => m1_beta-alanine[m1_c] + m1_CO2[m1_c]'	0.330831	0	0.330831	NaN	NaN	'm1_beta-Alanine metabolism'	''
'm1_HMR_4330'	'm1_3-oxopropanoate[m1_m] + m1_glutamate[m1_m] <=> m1_AKG[m1_m] + m1_beta-alanine[m1_m]'	-0.330831	-0.330973	0.661804	NaN	-0.347239	'm1_beta-Alanine metabolism'	'm1_Abat(lgFC:0.25529FDR:0.74379)'
'm1_HMR_4347'	'm1_3-ureidopropionate[m1_c] + m1_H2O[m1_c] => m1_beta-alanine[m1_c] + m1_CO2[m1_c] + m1_NH3[m1_c]'	0	0	0	NaN	3.90799e-13	'm1_beta-Alanine metabolism'	'm1_Upb1(lgFC:-0.034428FDR:1)'
'm1_HMR_4425'	'm1_ATP[m1_c] + m1_beta-alanine[m1_c] + m1_histidine[m1_c] => m1_AMP[m1_c] + m1_carnosine[m1_c] + m1_PPi[m1_c]'	0	0	0	NaN	NaN	'm1_beta-Alanine metabolism'	'm1_Carns1(lgFC:0.073566FDR:1)'
'm1_HMR_4427'	'm1_carnosine[m1_c] + m1_H2O[m1_c] => m1_beta-alanine[m1_c] + m1_histidine[m1_c]'	0	0	0	NaN	NaN	'm1_beta-Alanine metabolism'	'm1_Cndp2(lgFC:-0.14031FDR:0.99096)'
'm1_HMR_4689'	'm1_4-aminobutanal[m1_c] + m1_H2O[m1_c] + m1_NAD+[m1_c] => m1_4-aminobutyrate[m1_c] + m1_H+[m1_c] + m1_NADH[m1_c]'	0	0	0	NaN	NaN	'm1_beta-Alanine metabolism'	'm1_Aldh9a1(lgFC:0.08386FDR:0.98923)'
'm1_HMR_4735'	'm1_acrylyl-CoA[m1_m] + m1_H2O[m1_m] => m1_3-hydroxypropionyl-CoA[m1_m]'	0.296083	0.296083	0.592166	NaN	0.3266	'm1_beta-Alanine metabolism'	'm1_Echs1(lgFC:0.052418FDR:1) or m1_Hadha(lgFC:0.41971FDR:0.3895)'
'm1_HMR_7991'	'm1_H2O[m1_c] + m1_O2[m1_c] + m1_spermidine[m1_c] => m1_1,3-diaminopropane[m1_c] + m1_4-aminobutanal[m1_c] + m1_H2O2[m1_c]'	0	0	0	NaN	NaN	'm1_beta-Alanine metabolism'	''
'm1_HMR_7992'	'm1_1,3-diaminopropane[m1_c] + m1_H2O[m1_c] + m1_O2[m1_c] => m1_3-amino-propanal[m1_c] + m1_H2O2[m1_c] + m1_NH3[m1_c]'	0	0	0	NaN	NaN	'm1_beta-Alanine metabolism'	'm1_Aoc2(lgFC:0.73402FDR:0.61336) or m1_Aoc3(lgFC:-0.59812FDR:0.92597)'
'm1_HMR_7993'	'm1_3-amino-propanal[m1_c] + m1_H2O[m1_c] + m1_NAD+[m1_c] => m1_beta-alanine[m1_c] + m1_H+[m1_c] + m1_NADH[m1_c]'	0	0	0	NaN	NaN	'm1_beta-Alanine metabolism'	'm1_Aldh1b1(lgFC:-0.28921FDR:0.73037) or m1_Aldh2(lgFC:-0.029657FDR:1) or m1_Aldh3a2(lgFC:-0.10108FDR:1) or m1_Aldh7a1(lgFC:-0.19043FDR:0.71271) or m1_Aldh9a1(lgFC:0.08386FDR:0.98923)'
'm1_HMR_7128'	'm1_ATP[m1_c] + m1_selenate[m1_c] => m1_adenylylselenate[m1_c] + m1_PPi[m1_c]'	0	0	0	NaN	NaN	'm1_Other amino acid'	'm1_Papss1(lgFC:-0.17739FDR:0.94969) or m1_Papss2(lgFC:-0.73477FDR:0.25723)'
'm1_HMR_7129'	'm1_adenylylselenate[m1_c] + m1_ATP[m1_c] => m1_3-phosphoadenylylselenate[m1_c] + m1_ADP[m1_c]'	0	0	0	NaN	NaN	'm1_Other amino acid'	'm1_Papss1(lgFC:-0.17739FDR:0.94969) or m1_Papss2(lgFC:-0.73477FDR:0.25723)'
'm1_HMR_7130'	'm1_3-phosphoadenylylselenate[m1_c] + m1_NADPH[m1_c] => m1_H+[m1_c] + m1_NADP+[m1_c] + m1_PAP[m1_c] + m1_selenite[m1_c]'	0	0	0	NaN	NaN	'm1_Other amino acid'	''
'm1_HMR_7131'	'5 m1_H+[m1_c] + 3 m1_NADPH[m1_c] + m1_selenite[m1_c] => 3 m1_H2O[m1_c] + 3 m1_NADP+[m1_c] + m1_selenide[m1_c]'	0	0	0	NaN	NaN	'm1_Other amino acid'	'm1_Txnrd1(lgFC:-0.075994FDR:0.97204) or m1_Txnrd2(lgFC:-0.037219FDR:1) or m1_Txnrd3(lgFC:-0.13103FDR:0.92145)'
'm1_HMR_7132'	'm1_ATP[m1_c] + m1_H2O[m1_c] + m1_selenide[m1_c] => m1_AMP[m1_c] + m1_Pi[m1_c] + m1_selenophosphate[m1_c]'	0	0	0	NaN	NaN	'm1_Other amino acid'	'm1_Sephs1(lgFC:0.26252FDR:0.35036) or m1_Sephs2(lgFC:-0.11747FDR:0.96032)'
'm1_HMR_7133'	'm1_alanine[m1_c] + m1_pyridoxal-phosphate[m1_c] + m1_selenide[m1_c] <=> m1_pyridoxine-phosphate[m1_c] + m1_selenocysteine[m1_c]'	0	0	0	NaN	NaN	'm1_Other amino acid'	'm1_Scly(lgFC:-0.13569FDR:0.81109)'
'm1_HMR_7134'	'm1_H2O[m1_c] + m1_selenocystathionine[m1_c] <=> m1_2-oxobutyrate[m1_c] + m1_NH3[m1_c] + m1_selenocysteine[m1_c]'	0	0	0	NaN	NaN	'm1_Other amino acid'	'm1_Cth(lgFC:-0.072465FDR:1)'
'm1_HMR_7135'	'm1_H2O[m1_c] + m1_selenocystathionine[m1_c] => m1_selenohomocysteine[m1_c] + m1_serine[m1_c]'	0	0	0	NaN	NaN	'm1_Other amino acid'	'm1_Cbs(lgFC:-0.32487FDR:0.87173)'
'm1_HMR_7136'	'm1_H2O[m1_c] + m1_se-adenosyl-L-selenohomocysteine[m1_c] <=> m1_adenosine[m1_c] + m1_selenohomocysteine[m1_c]'	0	0	0	NaN	NaN	'm1_Other amino acid'	'm1_Ahcy(lgFC:0.16977FDR:0.83812) or m1_Ahcyl1(lgFC:-0.018677FDR:1) or m1_Ahcyl2(lgFC:0.25505FDR:0.92145)'
'm1_HMR_7137'	'm1_H2O[m1_c] + m1_selenomethionine[m1_c] <=> m1_2-oxobutyrate[m1_c] + m1_methaneselenol[m1_c] + m1_NH3[m1_c]'	0	0	0	NaN	NaN	'm1_Other amino acid'	'm1_Cth(lgFC:-0.072465FDR:1)'
'm1_HMR_7138'	'm1_H+[m1_c] + m1_NADPH[m1_c] + m1_O2[m1_c] + m1_selenomethionine[m1_c] => m1_H2O[m1_c] + m1_NADP+[m1_c] + m1_selenomethionine-se-oxide[m1_c]'	0	0	0	NaN	NaN	'm1_Other amino acid'	'm1_Fmo1(lgFC:0.15008FDR:0.97449) or m1_Fmo2(lgFC:0.30943FDR:0.93864) or m1_Fmo3(lgFC:-1.4566FDR:0.73682) or m1_Fmo4(lgFC:0.10883FDR:1) or m1_Fmo5(lgFC:-0.35693FDR:0.78747)'
'm1_HMR_7139'	'm1_ATP[m1_c] + m1_H+[m1_c] + m1_H2O[m1_c] + m1_selenomethionine[m1_c] <=> m1_Pi[m1_c] + m1_PPi[m1_c] + m1_se-adenosylselenomethionine[m1_c]'	0	0	0	NaN	NaN	'm1_Other amino acid'	'm1_Mat1a(lgFC:0.97666FDR:0.71092) or m1_Mat2a(lgFC:0.1194FDR:0.92979) or m1_Mat2b(lgFC:-0.0093659FDR:1)'
'm1_HMR_7140'	'm1_SAH[m1_c] + m1_se-methyl-L-selenocysteine[m1_c] <=> m1_SAM[m1_c] + m1_selenocysteine[m1_c]'	0	0	0	NaN	NaN	'm1_Other amino acid'	''
'm1_HMR_7141'	'm1_H2O[m1_c] + m1_se-methyl-L-selenocysteine[m1_c] => m1_methaneselenol[m1_c] + m1_NH3[m1_c] + m1_pyruvate[m1_c]'	0	0	0	NaN	NaN	'm1_Other amino acid'	'm1_Scly(lgFC:-0.13569FDR:0.81109)'
'm1_HMR_7647'	'm1_D-alanine[m1_p] + m1_H2O[m1_p] + m1_O2[m1_p] => m1_H2O2[m1_p] + m1_NH3[m1_p] + m1_pyruvate[m1_p]'	0	0	0	NaN	NaN	'm1_Other amino acid'	''
'm1_HMR_8640'	'm1_DNA[m1_n] + m1_se-adenosylselenomethionine[m1_n] => m1_DNA-5-methylcytosine[m1_n] + m1_H+[m1_n] + m1_se-adenosyl-L-selenohomocysteine[m1_n]'	0	0	0	NaN	NaN	'm1_Other amino acid'	'm1_Dnmt3a(lgFC:0.12688FDR:0.86143) or m1_Trdmt1(lgFC:0.4145FDR:0.54566)'
'm1_HMR_8689'	'm1_D-arginine[m1_p] + m1_H2O[m1_p] + m1_O2[m1_p] => m1_5-guanidino-2-oxopentanoate[m1_p] + m1_H2O2[m1_p] + m1_NH3[m1_p]'	0	0	0	NaN	NaN	'm1_Other amino acid'	''
'm1_HMR_8690'	'm1_D-ornithine[m1_p] + m1_H2O[m1_p] + m1_O2[m1_p] => m1_5-amino-2-oxopentanoic acid[m1_p] + m1_H2O2[m1_p] + m1_NH3[m1_p]'	0	0	0	NaN	NaN	'm1_Other amino acid'	''
'm1_HMR_3748'	'm1_3-methyl-2-oxobutyrate[m1_m] + m1_CoA[m1_m] + m1_NAD+[m1_m] => m1_CO2[m1_m] + m1_H+[m1_m] + m1_isobutyryl-CoA[m1_m] + m1_NADH[m1_m]'	0.0032807	0	0.0032807	0.994857	0.00326382	'm1_Valine, leucine, and isoleucine metabolism'	'm1_Bckdha(lgFC:0.039637FDR:1) or m1_Bckdhb(lgFC:-0.16996FDR:0.90744)'
'm1_HMR_3751'	'm1_isobutyryl-CoA[m1_m] + m1_ubiquinone[m1_m] => m1_methacrylyl-CoA[m1_m] + m1_ubiquinol[m1_m]'	0.0032807	0.00323431	0.00651501	0.985861	0.00323431	'm1_Valine, leucine, and isoleucine metabolism'	'm1_Acads(lgFC:0.09156FDR:0.98922) or m1_Acadsb(lgFC:-0.24846FDR:0.81679)'
'm1_HMR_3753'	'm1_H2O[m1_m] + m1_methacrylyl-CoA[m1_m] => m1_3-hydroxyisobutyryl-CoA[m1_m]'	0.0032807	0	0.0032807	1.10307	0.00361884	'm1_Valine, leucine, and isoleucine metabolism'	'm1_Echs1(lgFC:0.052418FDR:1) or m1_Hadha(lgFC:0.41971FDR:0.3895)'
'm1_HMR_3755'	'm1_3-hydroxyisobutyryl-CoA[m1_m] + m1_H2O[m1_m] => m1_3-hydroxyisobutyrate[m1_m] + m1_CoA[m1_m]'	0.0032807	0	0.0032807	1	0.0032807	'm1_Valine, leucine, and isoleucine metabolism'	'm1_Hibch(lgFC:0.047432FDR:1)'
'm1_HMR_3759'	'm1_2-methyl-3-oxopropanoate[m1_m] + m1_H2O[m1_m] + m1_NAD+[m1_m] => m1_H+[m1_m] + m1_methylmalonate[m1_m] + m1_NADH[m1_m]'	0	0	0	NaN	NaN	'm1_Valine, leucine, and isoleucine metabolism'	'm1_Aldh1b1(lgFC:-0.28921FDR:0.73037) or m1_Aldh2(lgFC:-0.029657FDR:1) or m1_Aldh3a2(lgFC:-0.10108FDR:1) or m1_Aldh7a1(lgFC:-0.19043FDR:0.71271) or m1_Aldh9a1(lgFC:0.08386FDR:0.98923) or m1_Aox1(lgFC:-0.44547FDR:0.61894)'
'm1_HMR_3763'	'm1_CoA[m1_m] + m1_methylmalonate[m1_m] => m1_(R)-methylmalonyl-CoA[m1_m] + m1_H2O[m1_m]'	0	0	0	NaN	NaN	'm1_Valine, leucine, and isoleucine metabolism'	'm1_Aldh6a1(lgFC:0.07587FDR:0.99582)'
'm1_HMR_3767'	'm1_4-methyl-2-oxopentanoate[m1_m] + m1_CoA[m1_m] + m1_NAD+[m1_m] => m1_CO2[m1_m] + m1_H+[m1_m] + m1_isovaleryl-CoA[m1_m] + m1_NADH[m1_m]'	0.0088825	0	0.0088825	0.994857	0.00883682	'm1_Valine, leucine, and isoleucine metabolism'	'm1_Bckdha(lgFC:0.039637FDR:1) or m1_Bckdhb(lgFC:-0.16996FDR:0.90744)'
'm1_HMR_3769'	'm1_3-methylcrotonyl-CoA[m1_m] + m1_ubiquinol[m1_m] <=> m1_isovaleryl-CoA[m1_m] + m1_ubiquinone[m1_m]'	-0.0088825	-0.117272	0.126154	0.97125	-0.00862713	'm1_Valine, leucine, and isoleucine metabolism'	'm1_Ivd(lgFC:-0.23443FDR:0.80831)'
'm1_HMR_3773'	'm1_3-methylcrotonyl-CoA[m1_m] + m1_ATP[m1_m] + m1_H+[m1_m] + m1_HCO3-[m1_m] => m1_3-methylglutaconyl-CoA[m1_m] + m1_ADP[m1_m] + m1_Pi[m1_m]'	0.0088825	0	0.0088825	0.986242	0.00876029	'm1_Valine, leucine, and isoleucine metabolism'	'm1_Mccc1(lgFC:-0.22169FDR:0.87708) or m1_Mccc2(lgFC:-0.16077FDR:0.9051)'
'm1_HMR_3775'	'm1_3-methylglutaconyl-CoA[m1_m] + m1_H2O[m1_m] <=> m1_HMG-CoA[m1_m]'	0.0088825	0	0.0088825	1	0.0088825	'm1_Valine, leucine, and isoleucine metabolism'	'm1_Auh(lgFC:-0.015321FDR:1)'
'm1_HMR_3780'	'm1_2-oxo-3-methylvalerate[m1_m] + m1_CoA[m1_m] + m1_NAD+[m1_m] => m1_2-methylbutyryl-CoA[m1_m] + m1_CO2[m1_m] + m1_H+[m1_m] + m1_NADH[m1_m]'	0.000142436	0	0.000142436	0.994857	0.000141703	'm1_Valine, leucine, and isoleucine metabolism'	'm1_Bckdha(lgFC:0.039637FDR:1) or m1_Bckdhb(lgFC:-0.16996FDR:0.90744)'
'm1_HMR_3783'	'm1_2-methylbutyryl-CoA[m1_m] + m1_ubiquinone[m1_m] <=> m1_tiglyl-CoA[m1_m] + m1_ubiquinol[m1_m]'	0.000142436	0.000140422	0.000282857	0.985861	0.000140422	'm1_Valine, leucine, and isoleucine metabolism'	'm1_Acads(lgFC:0.09156FDR:0.98922) or m1_Acadsb(lgFC:-0.24846FDR:0.81679)'
'm1_HMR_3785'	'm1_H2O[m1_m] + m1_tiglyl-CoA[m1_m] => m1_(S)-3-hydroxy-2-methylbutyryl-CoA[m1_m]'	0.000142436	0	0.000142436	1.10307	0.000157116	'm1_Valine, leucine, and isoleucine metabolism'	'm1_Echs1(lgFC:0.052418FDR:1) or m1_Hadha(lgFC:0.41971FDR:0.3895)'
'm1_HMR_3790'	'm1_2-methyl-3-oxopropanoate[m1_c] + m1_H2O[m1_c] + m1_O2[m1_c] => m1_H2O2[m1_c] + m1_methylmalonate[m1_c]'	0	0	0	NaN	NaN	'm1_Valine, leucine, and isoleucine metabolism'	'm1_Aox1(lgFC:-0.44547FDR:0.61894)'
'm1_HMR_3792'	'm1_2-methyl-3-oxopropanoate[m1_m] + m1_glutamate[m1_m] <=> m1_AKG[m1_m] + m1_D-3-amino-isobutanoate[m1_m]'	0	-1.28272	1.28272	NaN	NaN	'm1_Valine, leucine, and isoleucine metabolism'	'm1_Abat(lgFC:0.25529FDR:0.74379) or m1_Agxt2(lgFC:0.18349FDR:0.95006)'
'm1_HMR_3823'	'm1_(S)-3-hydroxy-2-methylbutyryl-CoA[m1_m] + m1_NAD+[m1_m] => m1_2-methylacetoacetyl-CoA[m1_m] + m1_H+[m1_m] + m1_NADH[m1_m]'	0.000142436	0	0.000142436	1.27059	0.000180977	'm1_Valine, leucine, and isoleucine metabolism'	'm1_Hadh(lgFC:0.047722FDR:1) or m1_Hsd17b10(lgFC:0.71774FDR:0.16044)'
'm1_HMR_6416'	'm1_3-methyl-2-oxobutyrate[m1_m] + m1_lipoamide[m1_m] => m1_CO2[m1_m] + m1_S-(2-methylpropanoyl)-dihydrolipoamide[m1_m]'	0	0	0	NaN	NaN	'm1_Valine, leucine, and isoleucine metabolism'	'm1_Bckdha(lgFC:0.039637FDR:1) or m1_Bckdhb(lgFC:-0.16996FDR:0.90744)'
'm1_HMR_3986'	'2 m1_chitin-component[m1_s] + m1_H2O[m1_s] => m1_chitobiose[m1_s]'	0	0	0	NaN	NaN	'm1_Amino sugar and nucleotide sugar metabolism'	''
'm1_HMR_3988'	'm1_chitobiose[m1_l] + m1_H2O[m1_l] => 2 m1_N-acetylglucosamine[m1_l]'	0	0	0	NaN	NaN	'm1_Amino sugar and nucleotide sugar metabolism'	'm1_Hexa(lgFC:-0.26348FDR:0.42295) or m1_Hexb(lgFC:-0.33583FDR:0.57088)'
'm1_HMR_4124'	'm1_UDP-glucuronate[m1_r] => m1_CO2[m1_r] + m1_UDP-xylose[m1_r]'	0	0	0	NaN	NaN	'm1_Amino sugar and nucleotide sugar metabolism'	'm1_Uxs1(lgFC:0.097037FDR:1)'
'm1_HMR_4158'	'm1_N-acetylglucosamine-1-phosphate[m1_c] + m1_UTP[m1_c] => m1_PPi[m1_c] + m1_UDP-N-acetylglucosamine[m1_c]'	0	0	0	NaN	NaN	'm1_Amino sugar and nucleotide sugar metabolism'	'm1_Uap1(lgFC:0.11553FDR:0.98278) or m1_Uap1l1(lgFC:-0.35917FDR:0.85698)'
'm1_HMR_4159'	'm1_UDP-N-acetyl-D-galactosamine[m1_c] <=> m1_UDP-N-acetylglucosamine[m1_c]'	0	0	0	NaN	NaN	'm1_Amino sugar and nucleotide sugar metabolism'	'm1_Gale(lgFC:0.11466FDR:1)'
'm1_HMR_4299'	'm1_glucosamine-6-phosphate[m1_c] + m1_H2O[m1_c] => m1_fructose-6-phosphate[m1_c] + m1_NH3[m1_c]'	0	0	0	NaN	NaN	'm1_Amino sugar and nucleotide sugar metabolism'	'm1_Gnpda1(lgFC:-0.054918FDR:1) or m1_Gnpda2(lgFC:-0.16392FDR:0.93923)'
'm1_HMR_4300'	'm1_fructose-6-phosphate[m1_c] + m1_glutamine[m1_c] => m1_glucosamine-6-phosphate[m1_c] + m1_glutamate[m1_c]'	0	0	0	NaN	NaN	'm1_Amino sugar and nucleotide sugar metabolism'	'm1_Gfpt1(lgFC:0.18775FDR:0.879) or m1_Gfpt2(lgFC:-0.4268FDR:0.94869)'
'm1_HMR_4494'	'm1_ATP[m1_c] + m1_glucosamine[m1_c] => m1_ADP[m1_c] + m1_glucosamine-6-phosphate[m1_c]'	0	0	0	NaN	NaN	'm1_Amino sugar and nucleotide sugar metabolism'	'm1_Gck(lgFC:-0.49366FDR:0.74686) or m1_Hk1(lgFC:-0.13604FDR:0.99256) or m1_Hk2(lgFC:-0.74271FDR:0.48207) or m1_Hk3(lgFC:-1.4714FDR:0.61669)'
'm1_HMR_4524'	'm1_ATP[m1_c] + m1_N-acetylglucosamine[m1_c] => m1_ADP[m1_c] + m1_N-acetylglucosamine-6-phosphate[m1_c]'	0	0	0	NaN	NaN	'm1_Amino sugar and nucleotide sugar metabolism'	'm1_Nagk(lgFC:-0.18174FDR:0.90072)'
'm1_HMR_4525'	'm1_H2O[m1_r] + m1_UDP-N-acetylglucosamine[m1_r] => m1_N-acetyl-D-mannosamine[m1_r] + m1_UDP[m1_r]'	0	0	0	NaN	NaN	'm1_Amino sugar and nucleotide sugar metabolism'	'm1_Gne(lgFC:-0.45032FDR:0.53841)'
'm1_HMR_4526'	'm1_H2O[m1_c] + m1_UDP-N-acetylglucosamine[m1_c] => m1_N-acetyl-D-mannosamine[m1_c] + m1_UDP[m1_c]'	0	0	0	NaN	NaN	'm1_Amino sugar and nucleotide sugar metabolism'	'm1_Gne(lgFC:-0.45032FDR:0.53841)'
'm1_HMR_4527'	'm1_N-acetyl-D-mannosamine[m1_c] <=> m1_N-acetylglucosamine[m1_c]'	0	0	0	NaN	NaN	'm1_Amino sugar and nucleotide sugar metabolism'	'm1_Renbp(lgFC:-0.60208FDR:0.67364)'
'm1_HMR_4528'	'm1_ATP[m1_c] + m1_N-acetyl-D-mannosamine[m1_c] => m1_ADP[m1_c] + m1_N-acetylmannosamine-6-phosphate[m1_c]'	0	0	0	NaN	NaN	'm1_Amino sugar and nucleotide sugar metabolism'	'm1_Gne(lgFC:-0.45032FDR:0.53841)'
'm1_HMR_4529'	'm1_H2O[m1_c] + m1_N-acetylmannosamine-6-phosphate[m1_c] + m1_PEP[m1_c] => m1_N-acetylneuraminate-9-phosphate[m1_c] + m1_Pi[m1_c]'	0	0	0	NaN	NaN	'm1_Amino sugar and nucleotide sugar metabolism'	'm1_Nans(lgFC:-0.13648FDR:1)'
'm1_HMR_4530'	'm1_H2O[m1_c] + m1_N-acetylneuraminate-9-phosphate[m1_c] => m1_N-acetylneuraminate[m1_c] + m1_Pi[m1_c]'	0	0	0	NaN	0	'm1_Amino sugar and nucleotide sugar metabolism'	'm1_Nanp(lgFC:-1.8313FDR:0.56842)'
'm1_HMR_4531'	'm1_H+[m1_c] + m1_N-acetylneuraminate[m1_c] + m1_NADH[m1_c] + m1_O2[m1_c] => m1_H2O[m1_c] + m1_NAD+[m1_c] + m1_neungc[m1_c]'	0	0	0	NaN	NaN	'm1_Amino sugar and nucleotide sugar metabolism'	''
'm1_HMR_4532'	'm1_CTP[m1_c] + m1_neungc[m1_c] => m1_CMP-neuNGc[m1_c] + m1_PPi[m1_c]'	0	0	0	NaN	NaN	'm1_Amino sugar and nucleotide sugar metabolism'	'm1_Cmas(lgFC:0.063934FDR:0.91744)'
'm1_HMR_4533'	'm1_CMP-neuNGc[m1_c] + m1_H2O[m1_c] + m1_NAD+[m1_c] => m1_CMP-N-acetylneuraminate[m1_c] + m1_H+[m1_c] + m1_NADH[m1_c] + m1_O2[m1_c]'	0	0	0	NaN	NaN	'm1_Amino sugar and nucleotide sugar metabolism'	''
'm1_HMR_4536'	'm1_CTP[m1_n] + m1_N-acetylneuraminate[m1_n] => m1_CMP-N-acetylneuraminate[m1_n] + m1_PPi[m1_n]'	0	0	0	NaN	NaN	'm1_Amino sugar and nucleotide sugar metabolism'	'm1_Cmas(lgFC:0.063934FDR:0.91744)'
'm1_HMR_4628'	'm1_acetyl-CoA[m1_c] + m1_glucosamine-6-phosphate[m1_c] => m1_CoA[m1_c] + m1_N-acetylglucosamine-6-phosphate[m1_c]'	0	0	0	NaN	NaN	'm1_Amino sugar and nucleotide sugar metabolism'	'm1_Gnpnat1(lgFC:-0.10075FDR:0.95003)'
'm1_HMR_4629'	'm1_H2O[m1_c] + m1_N-acetylglucosamine-6-phosphate[m1_c] => m1_acetate[m1_c] + m1_glucosamine-6-phosphate[m1_c]'	0	0	0	NaN	NaN	'm1_Amino sugar and nucleotide sugar metabolism'	'm1_Amdhd2(lgFC:-0.1853FDR:0.87364)'
'm1_HMR_4631'	'm1_N-acetylglucosamine-6-phosphate[m1_c] => m1_N-acetylglucosamine-1-phosphate[m1_c]'	0	0	0	NaN	NaN	'm1_Amino sugar and nucleotide sugar metabolism'	'm1_Pgm3(lgFC:0.46869FDR:0.75966)'
'm1_HMR_7696'	'm1_dTTP[m1_c] + m1_glucose-1-phosphate[m1_c] => m1_dTDP-glucose[m1_c] + m1_PPi[m1_c]'	0	0	0	NaN	NaN	'm1_Amino sugar and nucleotide sugar metabolism'	''
'm1_HMR_7697'	'm1_dTDP-glucose[m1_c] => m1_4,6-dideoxy-4-oxo-dTDP-D-glucose[m1_c] + m1_H2O[m1_c]'	0	0	0	NaN	NaN	'm1_Amino sugar and nucleotide sugar metabolism'	'm1_Tgds(lgFC:-0.29966FDR:0.49847)'
'm1_HMR_7698'	'm1_dTDP-galactose[m1_c] <=> m1_dTDP-glucose[m1_c]'	0	0	0	NaN	NaN	'm1_Amino sugar and nucleotide sugar metabolism'	'm1_Gale(lgFC:0.11466FDR:1)'
'm1_HMR_8366'	'm1_ATP[m1_c] + m1_N-acetylgalactosamine[m1_c] => m1_ADP[m1_c] + m1_N-acetylgalactosamine-1-phosphate[m1_c]'	0	0	0	NaN	NaN	'm1_Amino sugar and nucleotide sugar metabolism'	''
'm1_HMR_8367'	'm1_ITP[m1_c] + m1_N-acetylgalactosamine[m1_c] => m1_IDP[m1_c] + m1_N-acetylgalactosamine-1-phosphate[m1_c]'	0	0	0	NaN	NaN	'm1_Amino sugar and nucleotide sugar metabolism'	''
'm1_HMR_8368'	'm1_N-acetylgalactosamine-1-phosphate[m1_c] + m1_UTP[m1_c] => m1_PPi[m1_c] + m1_UDP-N-acetyl-D-galactosamine[m1_c]'	0	0	0	NaN	NaN	'm1_Amino sugar and nucleotide sugar metabolism'	''
'm1_HMR_8371'	'm1_H2O[m1_c] + m1_mannose-6-phosphate[m1_c] + m1_PEP[m1_c] => m1_3-deoxy-D-glycero-D-galacto-2-nonulosonic acid-9-phosphate[m1_c] + m1_Pi[m1_c]'	0	0	0	NaN	NaN	'm1_Amino sugar and nucleotide sugar metabolism'	'm1_Nans(lgFC:-0.13648FDR:1)'
'm1_HMR_8372'	'm1_3-deoxy-D-glycero-D-galacto-2-nonulosonic acid-9-phosphate[m1_c] + m1_H2O[m1_c] => m1_3-deoxy-D-glycero-D-galacto-2-nonulosonic acid[m1_c] + m1_Pi[m1_c]'	0	0	0	NaN	NaN	'm1_Amino sugar and nucleotide sugar metabolism'	''
'm1_HMR_8373'	'm1_N-acetyl-D-mannosamine[m1_c] + m1_pyruvate[m1_c] <=> m1_N-acetylneuraminate[m1_c]'	0	0	0	NaN	NaN	'm1_Amino sugar and nucleotide sugar metabolism'	''
'm1_HMR_8375'	'm1_chitin-component[m1_c] + m1_H2O[m1_c] => m1_N-acetylglucosamine[m1_c]'	1	0	1	NaN	1.3727	'm1_Amino sugar and nucleotide sugar metabolism'	'm1_Mansc1(lgFC:0.70517FDR:0.40873)'
'm1_HMR_8376'	'm1_chitin-component[m1_s] + m1_H2O[m1_s] => m1_N-acetylglucosamine[m1_s]'	0	0	0	NaN	NaN	'm1_Amino sugar and nucleotide sugar metabolism'	''
'm1_HMR_8377'	'm1_CTP[m1_c] + m1_N-acetylneuraminate[m1_c] => m1_CMP-N-acetylneuraminate[m1_c] + m1_PPi[m1_c]'	0	0	0	NaN	NaN	'm1_Amino sugar and nucleotide sugar metabolism'	'm1_Cmas(lgFC:0.063934FDR:0.91744)'
'm1_HMR_8672'	'm1_UDP-glucuronate[m1_g] => m1_CO2[m1_g] + m1_UDP-xylose[m1_g]'	0	0	0	NaN	NaN	'm1_Amino sugar and nucleotide sugar metabolism'	'm1_Uxs1(lgFC:0.097037FDR:1)'
'm1_HMR_8674'	'm1_4,6-dideoxy-4-oxo-dTDP-D-glucose[m1_c] => m1_dTDP-4-dehydro-6-deoxy-L-mannose[m1_c]'	0	0	0	NaN	NaN	'm1_Amino sugar and nucleotide sugar metabolism'	''
'm1_HMR_8675'	'm1_dTDP-4-dehydro-6-deoxy-L-mannose[m1_c] + m1_H+[m1_c] + m1_NADPH[m1_c] => m1_dTDP-6-deoxy-L-mannose[m1_c] + m1_NADP+[m1_c]'	0	0	0	NaN	NaN	'm1_Amino sugar and nucleotide sugar metabolism'	''
'm1_HMR_5130'	'm1_ATP[m1_c] + m1_tRNA(tyr)[m1_c] + m1_tyrosine[m1_c] => m1_AMP[m1_c] + m1_L-tyrosyl-tRNA(tyr)[m1_c] + m1_PPi[m1_c]'	0	0	0	NaN	NaN	'm1_Aminoacyl-tRNA biosynthesis'	'm1_Yars(lgFC:0.029674FDR:1) or m1_Yars2(lgFC:0.005943FDR:1)'
'm1_HMR_5131'	'm1_alanine[m1_c] + m1_ATP[m1_c] + m1_tRNA(ala)[m1_c] => m1_AMP[m1_c] + m1_L-alanyl-tRNA(ala)[m1_c] + m1_PPi[m1_c]'	0	0	0	NaN	NaN	'm1_Aminoacyl-tRNA biosynthesis'	'm1_Aars(lgFC:0.0099727FDR:1)'
'm1_HMR_5132'	'm1_arginine[m1_c] + m1_ATP[m1_c] + m1_tRNA(arg)[m1_c] => m1_AMP[m1_c] + m1_L-arginyl-tRNA(arg)[m1_c] + m1_PPi[m1_c]'	0	0	0	NaN	NaN	'm1_Aminoacyl-tRNA biosynthesis'	'm1_Rars2(lgFC:0.21797FDR:0.89108)'
'm1_HMR_5133'	'm1_asparagine[m1_c] + m1_ATP[m1_c] + m1_tRNA(asn)[m1_c] => m1_AMP[m1_c] + m1_L-asparaginyl-tRNA(asn)[m1_c] + m1_PPi[m1_c]'	0	0	0	NaN	NaN	'm1_Aminoacyl-tRNA biosynthesis'	'm1_Nars(lgFC:-0.016398FDR:1) or m1_Nars2(lgFC:0.10556FDR:0.90269)'
'm1_HMR_5134'	'm1_aspartate[m1_c] + m1_ATP[m1_c] + m1_tRNA(asp)[m1_c] => m1_AMP[m1_c] + m1_L-aspartyl-tRNA(asp)[m1_c] + m1_PPi[m1_c]'	0	0	0	NaN	NaN	'm1_Aminoacyl-tRNA biosynthesis'	'm1_Dars(lgFC:-0.058268FDR:0.93252) or m1_Dars2(lgFC:-0.24425FDR:0.92125)'
'm1_HMR_5135'	'm1_ATP[m1_c] + m1_cysteine[m1_c] + m1_tRNA(cys)[m1_c] => m1_AMP[m1_c] + m1_L-cysteinyl-tRNA(cys)[m1_c] + m1_PPi[m1_c]'	0	0	0	NaN	NaN	'm1_Aminoacyl-tRNA biosynthesis'	'm1_Cars2(lgFC:-0.44046FDR:0.46803)'
'm1_HMR_5136'	'm1_ATP[m1_c] + m1_glutamine[m1_c] + m1_tRNA(gln)[m1_c] => m1_AMP[m1_c] + m1_L-glutaminyl-tRNA(gln)[m1_c] + m1_PPi[m1_c]'	0	0	0	NaN	NaN	'm1_Aminoacyl-tRNA biosynthesis'	'm1_Qars(lgFC:0.23534FDR:0.94867)'
'm1_HMR_5137'	'm1_ATP[m1_c] + m1_glutamate[m1_c] + m1_tRNA(glu)[m1_c] => m1_AMP[m1_c] + m1_L-glutamyl-tRNA(glu)[m1_c] + m1_PPi[m1_c]'	0	0	0	NaN	NaN	'm1_Aminoacyl-tRNA biosynthesis'	'm1_Ears2(lgFC:0.11833FDR:0.99045) or m1_Eprs(lgFC:-0.013359FDR:1)'
'm1_HMR_5138'	'm1_ATP[m1_c] + m1_glycine[m1_c] + m1_tRNA(gly)[m1_c] => m1_AMP[m1_c] + m1_glycyl-tRNA(gly)[m1_c] + m1_PPi[m1_c]'	0	0	0	NaN	NaN	'm1_Aminoacyl-tRNA biosynthesis'	'm1_Gars(lgFC:0.071145FDR:0.97279)'
'm1_HMR_5139'	'm1_ATP[m1_c] + m1_histidine[m1_c] + m1_tRNA(his)[m1_c] => m1_AMP[m1_c] + m1_L-histidyl-tRNA(his)[m1_c] + m1_PPi[m1_c]'	0	0	0	NaN	NaN	'm1_Aminoacyl-tRNA biosynthesis'	'm1_Hars(lgFC:-0.02116FDR:1) or m1_Hars2(lgFC:-0.058813FDR:0.97436)'
'm1_HMR_5140'	'm1_ATP[m1_c] + m1_isoleucine[m1_c] + m1_tRNA(ile)[m1_c] => m1_AMP[m1_c] + m1_L-isoleucyl-tRNA(ile)[m1_c] + m1_PPi[m1_c]'	0	0	0	NaN	NaN	'm1_Aminoacyl-tRNA biosynthesis'	'm1_Iars(lgFC:0.075397FDR:0.9445) or m1_Iars2(lgFC:0.23828FDR:0.51766)'
'm1_HMR_5141'	'm1_ATP[m1_c] + m1_leucine[m1_c] + m1_tRNA(leu)[m1_c] => m1_AMP[m1_c] + m1_L-leucyl-tRNA(leu)[m1_c] + m1_PPi[m1_c]'	0	0	0	NaN	NaN	'm1_Aminoacyl-tRNA biosynthesis'	'm1_Lars(lgFC:0.26792FDR:0.24036) or m1_Lars2(lgFC:-0.40078FDR:0.76389)'
'm1_HMR_5142'	'm1_ATP[m1_c] + m1_lysine[m1_c] + m1_tRNA(lys)[m1_c] => m1_AMP[m1_c] + m1_L-lysyl-tRNA(lys)[m1_c] + m1_PPi[m1_c]'	0	0	0	NaN	NaN	'm1_Aminoacyl-tRNA biosynthesis'	'm1_Kars(lgFC:-0.2401FDR:0.16284)'
'm1_HMR_5143'	'm1_ATP[m1_c] + m1_methionine[m1_c] + m1_tRNA(met)[m1_c] => m1_AMP[m1_c] + m1_L-methionyl-tRNA(met)[m1_c] + m1_PPi[m1_c]'	0	0	0	NaN	NaN	'm1_Aminoacyl-tRNA biosynthesis'	'm1_Mars(lgFC:-0.071306FDR:0.97619) or m1_Mars2(lgFC:0.49525FDR:0.16036)'
'm1_HMR_5145'	'm1_ATP[m1_c] + m1_phenylalanine[m1_c] + m1_tRNA(phe)[m1_c] => m1_AMP[m1_c] + m1_L-phenylalanyl-tRNA(phe)[m1_c] + m1_PPi[m1_c]'	0	0	0	NaN	0	'm1_Aminoacyl-tRNA biosynthesis'	'm1_Fars2(lgFC:-0.59239FDR:0.044285)'
'm1_HMR_5146'	'm1_ATP[m1_c] + m1_proline[m1_c] + m1_tRNA(pro)[m1_c] => m1_AMP[m1_c] + m1_L-prolyl-tRNA(pro)[m1_c] + m1_PPi[m1_c]'	0	0	0	NaN	NaN	'm1_Aminoacyl-tRNA biosynthesis'	'm1_Eprs(lgFC:-0.013359FDR:1) or m1_Pars2(lgFC:0.060158FDR:1)'
'm1_HMR_5147'	'm1_ATP[m1_c] + m1_serine[m1_c] + m1_tRNA(ser)[m1_c] => m1_AMP[m1_c] + m1_L-seryl-tRNA(ser)[m1_c] + m1_PPi[m1_c]'	0	0	0	NaN	NaN	'm1_Aminoacyl-tRNA biosynthesis'	'm1_Sars2(lgFC:-0.19747FDR:0.78072)'
'm1_HMR_5148'	'm1_ATP[m1_c] + m1_threonine[m1_c] + m1_tRNA(thr)[m1_c] => m1_AMP[m1_c] + m1_L-threonyl-tRNA(thr)[m1_c] + m1_PPi[m1_c]'	0	0	0	NaN	NaN	'm1_Aminoacyl-tRNA biosynthesis'	'm1_Tars(lgFC:0.083461FDR:0.95659) or m1_Tars2(lgFC:-0.49699FDR:0.0081167)'
'm1_HMR_5149'	'm1_ATP[m1_c] + m1_tRNA(trp)[m1_c] + m1_tryptophan[m1_c] => m1_AMP[m1_c] + m1_L-tryptophanyl-tRNA(trp)[m1_c] + m1_PPi[m1_c]'	0	0	0	NaN	NaN	'm1_Aminoacyl-tRNA biosynthesis'	'm1_Wars(lgFC:-0.073544FDR:1)'
'm1_HMR_5150'	'm1_ATP[m1_c] + m1_tRNA(val)[m1_c] + m1_valine[m1_c] => m1_AMP[m1_c] + m1_L-valyl-tRNA(val)[m1_c] + m1_PPi[m1_c]'	0	0	0	NaN	NaN	'm1_Aminoacyl-tRNA biosynthesis'	'm1_Vars(lgFC:-0.27986FDR:0.90455) or m1_Vars2(lgFC:-1.1071FDR:0.43751)'
'm1_HMR_7171'	'm1_CMP-N-acetylneuraminate[m1_g] + m1_T-antigen[m1_g] => m1_CMP[m1_g] + m1_sialyl-T antigen[m1_g]'	0	0	0	NaN	NaN	'm1_O-glycan metabolism'	'm1_St3gal1(lgFC:-0.030176FDR:1) or m1_St3gal2(lgFC:0.30539FDR:0.96752)'
'm1_HMR_7172'	'm1_CMP-N-acetylneuraminate[m1_g] + m1_sialyl-T antigen[m1_g] => m1_CMP[m1_g] + m1_disialyl-T antigen[m1_g]'	0	0	0	NaN	NaN	'm1_O-glycan metabolism'	''
'm1_HMR_7174'	'm1_Tn-antigen[m1_g] + m1_UDP-N-acetylglucosamine[m1_g] => m1_core 3[m1_g] + m1_UDP[m1_g]'	0	0	0	NaN	NaN	'm1_O-glycan metabolism'	''
'm1_HMR_7175'	'm1_core 3[m1_g] + m1_UDP-N-acetylglucosamine[m1_g] => m1_core 4[m1_g] + m1_UDP[m1_g]'	0	0	0	NaN	NaN	'm1_O-glycan metabolism'	''
'm1_HMR_7180'	'm1_Tn-antigen[m1_g] + m1_UDP-N-acetylglucosamine[m1_g] => m1_G00031[m1_g] + m1_UDP[m1_g]'	0	0	0	NaN	NaN	'm1_O-glycan metabolism'	'm1_Gcnt1(lgFC:0.68084FDR:0.86538) or m1_Gcnt4(lgFC:-0.077871FDR:1)'
'm1_HMR_7181'	'm1_G00031[m1_g] + m1_UDP-galactose[m1_g] => m1_G00032[m1_g] + m1_UDP[m1_g]'	0	0	0	NaN	NaN	'm1_O-glycan metabolism'	'm1_B4galt5(lgFC:-0.47226FDR:0.58054)'
'm1_HMR_7183'	'm1_CMP-N-acetylneuraminate[m1_g] + m1_Tn-antigen[m1_g] => m1_CMP[m1_g] + m1_sialyl-Tn antigen[m1_g]'	0	0	0	NaN	NaN	'm1_O-glycan metabolism'	''
'm1_HMR_7197'	'm1_serine[m1_c] => m1_[protein]-L-serine[m1_c] + m1_H2O[m1_c]'	0	0	0	NaN	NaN	'm1_O-glycan metabolism'	''
'm1_HMR_7436'	'm1_[protein]-L-serine[m1_g] + m1_UDP-N-acetyl-D-galactosamine[m1_g] => m1_Tn-antigen[m1_g] + m1_UDP[m1_g]'	0	0	0	NaN	NaN	'm1_O-glycan metabolism'	'm1_Galnt1(lgFC:0.13943FDR:0.69347) or m1_Galnt11(lgFC:-0.30668FDR:0.35036) or m1_Galnt15(lgFC:-0.092352FDR:1) or m1_Galnt18(lgFC:-0.14686FDR:0.99186) or m1_Galnt2(lgFC:-0.28809FDR:0.97369)'
'm1_HMR_7438'	'm1_Tn-antigen[m1_g] + m1_UDP-galactose[m1_g] => m1_T-antigen[m1_g] + m1_UDP[m1_g]'	0	0	0	NaN	NaN	'm1_O-glycan metabolism'	'm1_C1galt1(lgFC:0.15673FDR:0.86551) or m1_C1galt1c1(lgFC:-0.12056FDR:0.86118)'
'm1_HMR_7440'	'm1_T-antigen[m1_g] + m1_UDP-N-acetylglucosamine[m1_g] => m1_core 2[m1_g] + m1_UDP[m1_g]'	0	0	0	NaN	NaN	'm1_O-glycan metabolism'	'm1_Gcnt1(lgFC:0.68084FDR:0.86538) or m1_Gcnt4(lgFC:-0.077871FDR:1)'
'm1_HMR_8255'	'm1_core 2[m1_g] + m1_UDP-N-acetylglucosamine[m1_g] => m1_glcnac-alpha-1,4-core 2[m1_g] + m1_UDP[m1_g]'	0	0	0	NaN	NaN	'm1_O-glycan metabolism'	''
'm1_HMR_8256'	'm1_Tn-antigen[m1_g] + m1_UDP-N-acetyl-D-galactosamine[m1_g] => m1_core 5[m1_g] + m1_UDP[m1_g]'	0	0	0	NaN	NaN	'm1_O-glycan metabolism'	''
'm1_HMR_8257'	'm1_Tn-antigen[m1_g] + m1_UDP-N-acetylglucosamine[m1_g] => m1_core 6[m1_g] + m1_UDP[m1_g]'	0	0	0	NaN	NaN	'm1_O-glycan metabolism'	'm1_Gcnt1(lgFC:0.68084FDR:0.86538)'
'm1_HMR_8258'	'm1_core 6[m1_g] + m1_UDP-galactose[m1_g] => m1_F1alpha[m1_g] + m1_UDP[m1_g]'	0	0	0	NaN	NaN	'm1_O-glycan metabolism'	''
'm1_HMR_8260'	'm1_Tn-antigen[m1_g] + m1_UDP-N-acetyl-D-galactosamine[m1_g] => m1_core 7[m1_g] + m1_UDP[m1_g]'	0	0	0	NaN	NaN	'm1_O-glycan metabolism'	''
'm1_HMR_8261'	'm1_Tn-antigen[m1_g] + m1_UDP-galactose[m1_g] => m1_core 8[m1_g] + m1_UDP[m1_g]'	0	0	0	NaN	NaN	'm1_O-glycan metabolism'	''
'm1_HMR_1532'	'm1_PPi[m1_c] + m1_trans,trans,cis-geranyl-geranyl-pp[m1_c] <=> m1_dimethylallyl-PP[m1_c] + m1_farnesyl-PP[m1_c]'	0	0	0	NaN	NaN	'm1_N-glycan metabolism'	'm1_Fdps(lgFC:-0.09064FDR:1) or m1_Ggps1(lgFC:0.30361FDR:0.31664)'
'm1_HMR_7254'	'm1_isopentenyl-pPP[m1_c] + 17.6 m1_trans,trans,cis-geranyl-geranyl-pp[m1_c] => 0.1 m1_dehydrodolichol-diphosphate[m1_c] + 17.6 m1_PPi[m1_c]'	0	0	0	NaN	NaN	'm1_N-glycan metabolism'	'm1_Dhdds(lgFC:-0.26171FDR:0.72314)'
'm1_HMR_7255'	'm1_dehydrodolichol-diphosphate[m1_c] => m1_dolichyl-diphosphate[m1_c]'	0	0	0	NaN	NaN	'm1_N-glycan metabolism'	''
'm1_HMR_7256'	'm1_dolichyl-diphosphate[m1_c] + m1_H2O[m1_c] => m1_dolichyl-phosphate[m1_c] + m1_Pi[m1_c]'	0	0	0	NaN	NaN	'm1_N-glycan metabolism'	'm1_Dolpp1(lgFC:-0.062753FDR:1)'
'm1_HMR_7258'	'm1_dehydrodolichol-diphosphate[m1_c] + m1_H2O[m1_c] => m1_dehydrodolichol-phosphate[m1_c] + m1_Pi[m1_c]'	0	0	0	NaN	NaN	'm1_N-glycan metabolism'	''
'm1_HMR_7259'	'm1_dehydrodolichol-phosphate[m1_c] + m1_H2O[m1_c] => m1_dehydrodolichol[m1_c] + m1_Pi[m1_c]'	0	0	0	NaN	NaN	'm1_N-glycan metabolism'	''
'm1_HMR_7260'	'm1_dehydrodolichol[m1_c] + m1_H+[m1_c] + m1_NADPH[m1_c] => m1_dolichol[m1_c] + m1_NADP+[m1_c]'	0	0	0	NaN	NaN	'm1_N-glycan metabolism'	''
'm1_HMR_7261'	'm1_dolichyl-phosphate[m1_r] + m1_H2O[m1_r] => m1_dolichol[m1_r] + m1_Pi[m1_r]'	0	0	0	NaN	NaN	'm1_N-glycan metabolism'	''
'm1_HMR_7263'	'm1_CTP[m1_c] + m1_dolichol[m1_c] => m1_CDP[m1_c] + m1_dolichyl-phosphate[m1_c]'	0	0	0	NaN	NaN	'm1_N-glycan metabolism'	'm1_Dolk(lgFC:0.090078FDR:0.99146)'
'm1_HMR_7264'	'm1_dolichyl-phosphate[m1_c] + m1_UDP-N-acetylglucosamine[m1_c] => m1_N-acetyl-D-glucosaminyldiphosphodolichol[m1_c] + m1_UMP[m1_c]'	0	0	0	NaN	NaN	'm1_N-glycan metabolism'	'm1_Dpagt1(lgFC:-0.022015FDR:1)'
'm1_HMR_7265'	'm1_N-acetyl-D-glucosaminyldiphosphodolichol[m1_c] + m1_UDP-N-acetylglucosamine[m1_c] => m1_N,N-chitobiosyldiphosphodolichol[m1_c] + m1_UDP[m1_c]'	0	0	0	NaN	NaN	'm1_N-glycan metabolism'	'm1_Alg14(lgFC:-0.22806FDR:0.6017)'
'm1_HMR_7266'	'm1_GDP-mannose[m1_c] + m1_N,N-chitobiosyldiphosphodolichol[m1_c] => m1_beta-D-mannosyldiacetylchitobiosyldiphosphodolichol[m1_c] + m1_GDP[m1_c]'	0	0	0	NaN	NaN	'm1_N-glycan metabolism'	'm1_Alg1(lgFC:-0.14592FDR:0.77035)'
'm1_HMR_7267'	'm1_beta-D-mannosyldiacetylchitobiosyldiphosphodolichol[m1_c] + m1_GDP-mannose[m1_c] => m1_alpha-D-mannosyl-beta-D-mannosyl-diacetylchitobiosyldiphosphodolichol[m1_c] + m1_GDP[m1_c]'	0	0	0	NaN	NaN	'm1_N-glycan metabolism'	'm1_Alg2(lgFC:0.1948FDR:0.78747)'
'm1_HMR_7268'	'm1_alpha-D-mannosyl-beta-D-mannosyl-diacetylchitobiosyldiphosphodolichol[m1_c] + m1_GDP-mannose[m1_c] => m1_G00005[m1_c] + m1_GDP[m1_c]'	0	0	0	NaN	NaN	'm1_N-glycan metabolism'	'm1_Alg2(lgFC:0.1948FDR:0.78747)'
'm1_HMR_7269'	'm1_G00005[m1_c] + m1_GDP-mannose[m1_c] => m1_G10526[m1_c] + m1_GDP[m1_c]'	0	0	0	NaN	NaN	'm1_N-glycan metabolism'	'm1_Alg11(lgFC:0.05767FDR:0.97243)'
'm1_HMR_7270'	'm1_G10526[m1_c] + m1_GDP-mannose[m1_c] => m1_G00006[m1_c] + m1_GDP[m1_c]'	0	0	0	NaN	NaN	'm1_N-glycan metabolism'	'm1_Alg11(lgFC:0.05767FDR:0.97243)'
'm1_HMR_7271'	'm1_dolichyl-phosphate[m1_c] + m1_GDP-mannose[m1_c] => m1_dolichyl-phosphate-D-mannose[m1_c] + m1_GDP[m1_c]'	0	0	0	NaN	NaN	'm1_N-glycan metabolism'	'm1_Dpm1(lgFC:0.1338FDR:0.99848) or m1_Dpm3(lgFC:-0.28348FDR:0.74333)'
'm1_HMR_7274'	'm1_dolichyl-phosphate-D-mannose[m1_r] + m1_G00006[m1_r] => m1_dolichyl-phosphate[m1_r] + m1_G10595[m1_r]'	0	0	0	NaN	NaN	'm1_N-glycan metabolism'	'm1_Alg3(lgFC:-0.14771FDR:0.96186)'
'm1_HMR_7275'	'm1_dolichyl-phosphate-D-mannose[m1_r] + m1_G10595[m1_r] => m1_dolichyl-phosphate[m1_r] + m1_G10596[m1_r]'	0	0	0	NaN	NaN	'm1_N-glycan metabolism'	'm1_Alg9(lgFC:0.035269FDR:1)'
'm1_HMR_7276'	'm1_dolichyl-phosphate-D-mannose[m1_r] + m1_G10596[m1_r] => m1_dolichyl-phosphate[m1_r] + m1_G10597[m1_r]'	0	0	0	NaN	NaN	'm1_N-glycan metabolism'	'm1_Alg12(lgFC:0.19511FDR:0.93584)'
'm1_HMR_7277'	'm1_dolichyl-phosphate-D-mannose[m1_r] + m1_G10597[m1_r] => m1_dolichyl-phosphate[m1_r] + m1_G00007[m1_r]'	0	0	0	NaN	NaN	'm1_N-glycan metabolism'	'm1_Alg9(lgFC:0.035269FDR:1)'
'm1_HMR_7278'	'm1_dolichyl-phosphate[m1_r] + m1_UDP-glucose[m1_r] => m1_dolichyl-D-glucosyl-phosphate[m1_r] + m1_UDP[m1_r]'	0	0	0	NaN	NaN	'm1_N-glycan metabolism'	'm1_Alg5(lgFC:-0.10277FDR:0.88843)'
'm1_HMR_7279'	'm1_dolichyl-D-glucosyl-phosphate[m1_r] + m1_G00007[m1_r] => m1_dolichyl-phosphate[m1_r] + m1_G10598[m1_r]'	0	0	0	NaN	NaN	'm1_N-glycan metabolism'	'm1_Alg6(lgFC:-0.034439FDR:1)'
'm1_HMR_7280'	'm1_dolichyl-D-glucosyl-phosphate[m1_r] + m1_G10598[m1_r] => m1_dolichyl-phosphate[m1_r] + m1_G10599[m1_r]'	0	0	0	NaN	NaN	'm1_N-glycan metabolism'	'm1_Alg8(lgFC:-0.20272FDR:0.91444)'
'm1_HMR_7281'	'm1_dolichyl-D-glucosyl-phosphate[m1_r] + m1_G10599[m1_r] => m1_(Glc)3 (GlcNAc)2 (Man)9 (PP-Dol)1[m1_r] + m1_dolichyl-phosphate[m1_r]'	0	0	0	NaN	NaN	'm1_N-glycan metabolism'	''
'm1_HMR_7285'	'm1_(Glc)3 (GlcNAc)2 (Man)9 (PP-Dol)1[m1_r] + m1_[protein]-L-asparagine[m1_r] => m1_(alpha-D-Glucosyl)3-(alpha-D-mannosyl)8-beta-D-mannosyl-diacetylchitobiosyl-L-asparagine (protein)[m1_r] + m1_dolichyl-diphosphate[m1_r]'	0	0	0	NaN	NaN	'm1_N-glycan metabolism'	'm1_Dad1(lgFC:0.020981FDR:1) or m1_Ddost(lgFC:0.072281FDR:1) or m1_Rpn1(lgFC:0.25173FDR:0.78411) or m1_Rpn2(lgFC:0.19029FDR:0.90055) or m1_Stt3a(lgFC:0.10247FDR:0.96386) or m1_Stt3b(lgFC:0.51325FDR:0.050558) or m1_Tusc3(lgFC:-0.10736FDR:1)'
'm1_HMR_7286'	'm1_(alpha-D-Glucosyl)3-(alpha-D-mannosyl)8-beta-D-mannosyl-diacetylchitobiosyl-L-asparagine (protein)[m1_r] + m1_H2O[m1_r] => m1_(alpha-D-Glucosyl)2-(alpha-D-mannosyl)8-beta-D-mannosyl-diacetylchitobiosyl-L-asparagine (protein)[m1_r] + m1_glucose[m1_r]'	0	0	0	NaN	NaN	'm1_N-glycan metabolism'	'm1_Mogs(lgFC:-0.4151FDR:0.61075)'
'm1_HMR_7287'	'm1_(alpha-D-Glucosyl)2-(alpha-D-mannosyl)8-beta-D-mannosyl-diacetylchitobiosyl-L-asparagine (protein)[m1_r] + m1_H2O[m1_r] => m1_(alpha-D-Glucosyl)-(alpha-D-mannosyl)8-beta-D-mannosyl-diacetylchitobiosyl-L-asparagine (protein)[m1_r] + m1_glucose[m1_r]'	0	0	0	NaN	NaN	'm1_N-glycan metabolism'	'm1_Ganab(lgFC:-0.059558FDR:0.96662)'
'm1_HMR_7288'	'm1_(alpha-D-Glucosyl)-(alpha-D-mannosyl)8-beta-D-mannosyl-diacetylchitobiosyl-L-asparagine (protein)[m1_r] + m1_H2O[m1_r] => m1_glucosyl-(alpha-D-mannosyl)7-beta-D-mannosyl-diacetylchitobiosyl-L-asparagine, isoform C (protein)[m1_r] + m1_mannose[m1_r]'	0	0	0	NaN	NaN	'm1_N-glycan metabolism'	''
'm1_HMR_7289'	'm1_(alpha-D-Glucosyl)-(alpha-D-mannosyl)8-beta-D-mannosyl-diacetylchitobiosyl-L-asparagine (protein)[m1_r] + m1_H2O[m1_r] => m1_glucosyl-(alpha-D-mannosyl)7-beta-D-mannosyl-diacetylchitobiosyl-L-asparagine, isoform B (protein)[m1_r] + m1_mannose[m1_r]'	0	0	0	NaN	NaN	'm1_N-glycan metabolism'	'm1_Man1a(lgFC:-0.23911FDR:0.96974) or m1_Man1a2(lgFC:0.12563FDR:0.94164) or m1_Man1b1(lgFC:-0.24747FDR:0.1805) or m1_Man1c1(lgFC:-0.37789FDR:0.80209)'
'm1_HMR_7290'	'm1_(alpha-D-Glucosyl)-(alpha-D-mannosyl)8-beta-D-mannosyl-diacetylchitobiosyl-L-asparagine (protein)[m1_r] + m1_H2O[m1_r] => m1_(alpha-D-mannosyl)8-beta-D-mannosyl-diacetylchitobiosyl-L-asparagine (protein)[m1_r] + m1_glucose[m1_r]'	0	0	0	NaN	NaN	'm1_N-glycan metabolism'	''
'm1_HMR_7291'	'm1_glucosyl-(alpha-D-mannosyl)7-beta-D-mannosyl-diacetylchitobiosyl-L-asparagine, isoform C (protein)[m1_r] + m1_H2O[m1_r] => m1_glucosyl-(alpha-D-mannosyl)6-beta-D-mannosyl-diacetylchitobiosyl-L-asparagine (protein)[m1_r] + m1_mannose[m1_r]'	0	0	0	NaN	NaN	'm1_N-glycan metabolism'	'm1_Man1a(lgFC:-0.23911FDR:0.96974) or m1_Man1a2(lgFC:0.12563FDR:0.94164) or m1_Man1b1(lgFC:-0.24747FDR:0.1805) or m1_Man1c1(lgFC:-0.37789FDR:0.80209)'
'm1_HMR_7292'	'm1_glucosyl-(alpha-D-mannosyl)7-beta-D-mannosyl-diacetylchitobiosyl-L-asparagine, isoform B (protein)[m1_r] + m1_H2O[m1_r] => m1_glucosyl-(alpha-D-mannosyl)6-beta-D-mannosyl-diacetylchitobiosyl-L-asparagine (protein)[m1_r] + m1_mannose[m1_r]'	0	0	0	NaN	NaN	'm1_N-glycan metabolism'	''
'm1_HMR_7293'	'm1_(alpha-D-mannosyl)8-beta-D-mannosyl-diacetylchitobiosyl-L-asparagine (protein)[m1_r] + m1_H2O[m1_r] => m1_(alpha-D-mannosyl)7-beta-D-mannosyl-diacetylchitobiosyl-L-asparagine, isoform B (protein)[m1_r] + m1_mannose[m1_r]'	0	0	0	NaN	NaN	'm1_N-glycan metabolism'	'm1_Man1a(lgFC:-0.23911FDR:0.96974) or m1_Man1a2(lgFC:0.12563FDR:0.94164) or m1_Man1b1(lgFC:-0.24747FDR:0.1805) or m1_Man1c1(lgFC:-0.37789FDR:0.80209)'
'm1_HMR_7294'	'm1_glucosyl-(alpha-D-mannosyl)6-beta-D-mannosyl-diacetylchitobiosyl-L-asparagine (protein)[m1_r] => m1_glucosyl-(alpha-D-mannosyl)6-beta-D-mannosyl-diacetylchitobiosyl-L-asparagine (protein)[m1_g]'	0	0	0	NaN	NaN	'm1_N-glycan metabolism'	''
'm1_HMR_7295'	'm1_(alpha-D-Glucosyl)3-(alpha-D-mannosyl)8-beta-D-mannosyl-diacetylchitobiosyl-L-asparagine (protein)[m1_r] => m1_(alpha-D-Glucosyl)3-(alpha-D-mannosyl)8-beta-D-mannosyl-diacetylchitobiosyl-L-asparagine (protein)[m1_g]'	0	0	0	NaN	NaN	'm1_N-glycan metabolism'	''
'm1_HMR_7296'	'm1_(alpha-D-Glucosyl)2-(alpha-D-mannosyl)8-beta-D-mannosyl-diacetylchitobiosyl-L-asparagine (protein)[m1_r] => m1_(alpha-D-Glucosyl)2-(alpha-D-mannosyl)8-beta-D-mannosyl-diacetylchitobiosyl-L-asparagine (protein)[m1_g]'	0	0	0	NaN	NaN	'm1_N-glycan metabolism'	''
'm1_HMR_7297'	'm1_(alpha-D-Glucosyl)-(alpha-D-mannosyl)8-beta-D-mannosyl-diacetylchitobiosyl-L-asparagine (protein)[m1_r] => m1_(alpha-D-Glucosyl)-(alpha-D-mannosyl)8-beta-D-mannosyl-diacetylchitobiosyl-L-asparagine (protein)[m1_g]'	0	0	0	NaN	NaN	'm1_N-glycan metabolism'	''
'm1_HMR_7298'	'm1_glucosyl-(alpha-D-mannosyl)7-beta-D-mannosyl-diacetylchitobiosyl-L-asparagine, isoform B (protein)[m1_r] => m1_glucosyl-(alpha-D-mannosyl)7-beta-D-mannosyl-diacetylchitobiosyl-L-asparagine, isoform B (protein)[m1_g]'	0	0	0	NaN	NaN	'm1_N-glycan metabolism'	''
'm1_HMR_7299'	'm1_glucosyl-(alpha-D-mannosyl)7-beta-D-mannosyl-diacetylchitobiosyl-L-asparagine, isoform C (protein)[m1_r] => m1_glucosyl-(alpha-D-mannosyl)7-beta-D-mannosyl-diacetylchitobiosyl-L-asparagine, isoform C (protein)[m1_g]'	0	0	0	NaN	NaN	'm1_N-glycan metabolism'	''
'm1_HMR_7300'	'm1_(alpha-D-mannosyl)7-beta-D-mannosyl-diacetylchitobiosyl-L-asparagine, isoform B (protein)[m1_r] => m1_(alpha-D-mannosyl)7-beta-D-mannosyl-diacetylchitobiosyl-L-asparagine, isoform B (protein)[m1_g]'	0	0	0	NaN	NaN	'm1_N-glycan metabolism'	''
'm1_HMR_7301'	'm1_(alpha-D-Glucosyl)3-(alpha-D-mannosyl)8-beta-D-mannosyl-diacetylchitobiosyl-L-asparagine (protein)[m1_g] + 4 m1_H2O[m1_g] => m1_(alpha-D-mannosyl)7-beta-D-mannosyl-diacetylchitobiosyl-L-asparagine, isoform A (protein)[m1_g] + 3 m1_glucose[m1_g] + m1_mannose[m1_g]'	0	0	0	NaN	NaN	'm1_N-glycan metabolism'	''
'm1_HMR_7302'	'm1_(alpha-D-Glucosyl)2-(alpha-D-mannosyl)8-beta-D-mannosyl-diacetylchitobiosyl-L-asparagine (protein)[m1_g] + 3 m1_H2O[m1_g] => m1_(alpha-D-mannosyl)7-beta-D-mannosyl-diacetylchitobiosyl-L-asparagine, isoform A (protein)[m1_g] + 2 m1_glucose[m1_g] + m1_mannose[m1_g]'	0	0	0	NaN	NaN	'm1_N-glycan metabolism'	''
'm1_HMR_7303'	'm1_(alpha-D-Glucosyl)-(alpha-D-mannosyl)8-beta-D-mannosyl-diacetylchitobiosyl-L-asparagine (protein)[m1_g] + 2 m1_H2O[m1_g] => m1_(alpha-D-mannosyl)7-beta-D-mannosyl-diacetylchitobiosyl-L-asparagine, isoform A (protein)[m1_g] + m1_glucose[m1_g] + m1_mannose[m1_g]'	0	0	0	NaN	NaN	'm1_N-glycan metabolism'	''
'm1_HMR_7304'	'm1_glucosyl-(alpha-D-mannosyl)7-beta-D-mannosyl-diacetylchitobiosyl-L-asparagine, isoform C (protein)[m1_g] + 2 m1_H2O[m1_g] => m1_(alpha-D-mannosyl)6-beta-D-mannosyl-diacetylchitobiosyl-L-asparagine (protein) (C)[m1_g] + m1_glucose[m1_g] + m1_mannose[m1_g]'	0	0	0	NaN	NaN	'm1_N-glycan metabolism'	''
'm1_HMR_7305'	'm1_glucosyl-(alpha-D-mannosyl)7-beta-D-mannosyl-diacetylchitobiosyl-L-asparagine, isoform B (protein)[m1_g] + 2 m1_H2O[m1_g] => m1_(alpha-D-mannosyl)6-beta-D-mannosyl-diacetylchitobiosyl-L-asparagine (protein) (B2)[m1_g] + m1_glucose[m1_g] + m1_mannose[m1_g]'	0	0	0	NaN	NaN	'm1_N-glycan metabolism'	''
'm1_HMR_7306'	'm1_glucosyl-(alpha-D-mannosyl)6-beta-D-mannosyl-diacetylchitobiosyl-L-asparagine (protein)[m1_g] + 2 m1_H2O[m1_g] => m1_(alpha-D-mannosyl)5-beta-D-mannosyl-diacetylchitobiosyl-L-asparagine (protein) (B1)[m1_g] + m1_glucose[m1_g] + m1_mannose[m1_g]'	0	0	0	NaN	NaN	'm1_N-glycan metabolism'	''
'm1_HMR_7308'	'm1_(alpha-D-mannosyl)8-beta-D-mannosyl-diacetylchitobiosyl-L-asparagine (protein)[m1_g] + m1_H2O[m1_g] => m1_(alpha-D-mannosyl)7-beta-D-mannosyl-diacetylchitobiosyl-L-asparagine, isoform A (protein)[m1_g] + m1_mannose[m1_g]'	0	0	0	NaN	NaN	'm1_N-glycan metabolism'	'm1_Man1a(lgFC:-0.23911FDR:0.96974) or m1_Man1a2(lgFC:0.12563FDR:0.94164) or m1_Man1b1(lgFC:-0.24747FDR:0.1805) or m1_Man1c1(lgFC:-0.37789FDR:0.80209)'
'm1_HMR_7309'	'm1_(alpha-D-mannosyl)8-beta-D-mannosyl-diacetylchitobiosyl-L-asparagine (protein)[m1_g] + m1_H2O[m1_g] => m1_(alpha-D-mannosyl)7-beta-D-mannosyl-diacetylchitobiosyl-L-asparagine, isoform C (protein)[m1_g] + m1_mannose[m1_g]'	0	0	0	NaN	NaN	'm1_N-glycan metabolism'	'm1_Man1a(lgFC:-0.23911FDR:0.96974) or m1_Man1a2(lgFC:0.12563FDR:0.94164) or m1_Man1b1(lgFC:-0.24747FDR:0.1805) or m1_Man1c1(lgFC:-0.37789FDR:0.80209)'
'm1_HMR_7310'	'm1_(alpha-D-mannosyl)7-beta-D-mannosyl-diacetylchitobiosyl-L-asparagine, isoform A (protein)[m1_g] + m1_H2O[m1_g] => m1_(alpha-D-mannosyl)6-beta-D-mannosyl-diacetylchitobiosyl-L-asparagine (protein) (A)[m1_g] + m1_mannose[m1_g]'	0	0	0	NaN	NaN	'm1_N-glycan metabolism'	'm1_Man1a(lgFC:-0.23911FDR:0.96974) or m1_Man1a2(lgFC:0.12563FDR:0.94164) or m1_Man1b1(lgFC:-0.24747FDR:0.1805) or m1_Man1c1(lgFC:-0.37789FDR:0.80209)'
'm1_HMR_7311'	'm1_(alpha-D-mannosyl)7-beta-D-mannosyl-diacetylchitobiosyl-L-asparagine, isoform B (protein)[m1_g] + m1_H2O[m1_g] => m1_(alpha-D-mannosyl)6-beta-D-mannosyl-diacetylchitobiosyl-L-asparagine (protein) (B1)[m1_g] + m1_mannose[m1_g]'	0	0	0	NaN	NaN	'm1_N-glycan metabolism'	'm1_Man1a(lgFC:-0.23911FDR:0.96974) or m1_Man1a2(lgFC:0.12563FDR:0.94164) or m1_Man1b1(lgFC:-0.24747FDR:0.1805) or m1_Man1c1(lgFC:-0.37789FDR:0.80209)'
'm1_HMR_7312'	'm1_(alpha-D-mannosyl)7-beta-D-mannosyl-diacetylchitobiosyl-L-asparagine, isoform B (protein)[m1_g] + m1_H2O[m1_g] => m1_(alpha-D-mannosyl)6-beta-D-mannosyl-diacetylchitobiosyl-L-asparagine (protein) (B2)[m1_g] + m1_mannose[m1_g]'	0	0	0	NaN	NaN	'm1_N-glycan metabolism'	'm1_Man1a(lgFC:-0.23911FDR:0.96974) or m1_Man1a2(lgFC:0.12563FDR:0.94164) or m1_Man1b1(lgFC:-0.24747FDR:0.1805) or m1_Man1c1(lgFC:-0.37789FDR:0.80209)'
'm1_HMR_7313'	'm1_(alpha-D-mannosyl)7-beta-D-mannosyl-diacetylchitobiosyl-L-asparagine, isoform A (protein)[m1_g] + m1_H2O[m1_g] => m1_(alpha-D-mannosyl)6-beta-D-mannosyl-diacetylchitobiosyl-L-asparagine (protein) (C)[m1_g] + m1_mannose[m1_g]'	0	0	0	NaN	NaN	'm1_N-glycan metabolism'	'm1_Man1a(lgFC:-0.23911FDR:0.96974) or m1_Man1a2(lgFC:0.12563FDR:0.94164) or m1_Man1b1(lgFC:-0.24747FDR:0.1805) or m1_Man1c1(lgFC:-0.37789FDR:0.80209)'
'm1_HMR_7314'	'm1_(alpha-D-mannosyl)7-beta-D-mannosyl-diacetylchitobiosyl-L-asparagine, isoform C (protein)[m1_g] + m1_H2O[m1_g] => m1_(alpha-D-mannosyl)6-beta-D-mannosyl-diacetylchitobiosyl-L-asparagine (protein) (C)[m1_g] + m1_mannose[m1_g]'	0	0	0	NaN	NaN	'm1_N-glycan metabolism'	'm1_Man1a(lgFC:-0.23911FDR:0.96974) or m1_Man1a2(lgFC:0.12563FDR:0.94164) or m1_Man1b1(lgFC:-0.24747FDR:0.1805) or m1_Man1c1(lgFC:-0.37789FDR:0.80209)'
'm1_HMR_7315'	'm1_(alpha-D-mannosyl)6-beta-D-mannosyl-diacetylchitobiosyl-L-asparagine (protein) (A)[m1_g] + m1_H2O[m1_g] => m1_(alpha-D-mannosyl)5-beta-D-mannosyl-diacetylchitobiosyl-L-asparagine (protein) (C)[m1_g] + m1_mannose[m1_g]'	0	0	0	NaN	NaN	'm1_N-glycan metabolism'	'm1_Man1a(lgFC:-0.23911FDR:0.96974) or m1_Man1a2(lgFC:0.12563FDR:0.94164) or m1_Man1b1(lgFC:-0.24747FDR:0.1805) or m1_Man1c1(lgFC:-0.37789FDR:0.80209)'
'm1_HMR_7316'	'm1_(alpha-D-mannosyl)6-beta-D-mannosyl-diacetylchitobiosyl-L-asparagine (protein) (B1)[m1_g] + m1_H2O[m1_g] => m1_(alpha-D-mannosyl)5-beta-D-mannosyl-diacetylchitobiosyl-L-asparagine (protein) (B1)[m1_g] + m1_mannose[m1_g]'	0	0	0	NaN	NaN	'm1_N-glycan metabolism'	'm1_Man1a(lgFC:-0.23911FDR:0.96974) or m1_Man1a2(lgFC:0.12563FDR:0.94164) or m1_Man1b1(lgFC:-0.24747FDR:0.1805) or m1_Man1c1(lgFC:-0.37789FDR:0.80209)'
'm1_HMR_7317'	'm1_(alpha-D-mannosyl)6-beta-D-mannosyl-diacetylchitobiosyl-L-asparagine (protein) (B2)[m1_g] + m1_H2O[m1_g] => m1_(alpha-D-mannosyl)5-beta-D-mannosyl-diacetylchitobiosyl-L-asparagine (protein) (B1)[m1_g] + m1_mannose[m1_g]'	0	0	0	NaN	NaN	'm1_N-glycan metabolism'	'm1_Man1a(lgFC:-0.23911FDR:0.96974) or m1_Man1a2(lgFC:0.12563FDR:0.94164) or m1_Man1b1(lgFC:-0.24747FDR:0.1805) or m1_Man1c1(lgFC:-0.37789FDR:0.80209)'
'm1_HMR_7318'	'm1_(alpha-D-mannosyl)6-beta-D-mannosyl-diacetylchitobiosyl-L-asparagine (protein) (B2)[m1_g] + m1_H2O[m1_g] => m1_(alpha-D-mannosyl)5-beta-D-mannosyl-diacetylchitobiosyl-L-asparagine (protein) (B2)[m1_g] + m1_mannose[m1_g]'	0	0	0	NaN	NaN	'm1_N-glycan metabolism'	'm1_Man1a(lgFC:-0.23911FDR:0.96974) or m1_Man1a2(lgFC:0.12563FDR:0.94164) or m1_Man1b1(lgFC:-0.24747FDR:0.1805) or m1_Man1c1(lgFC:-0.37789FDR:0.80209)'
'm1_HMR_7319'	'm1_(alpha-D-mannosyl)6-beta-D-mannosyl-diacetylchitobiosyl-L-asparagine (protein) (C)[m1_g] + m1_H2O[m1_g] => m1_(alpha-D-mannosyl)5-beta-D-mannosyl-diacetylchitobiosyl-L-asparagine (protein) (C)[m1_g] + m1_mannose[m1_g]'	0	0	0	NaN	NaN	'm1_N-glycan metabolism'	'm1_Man1a(lgFC:-0.23911FDR:0.96974) or m1_Man1a2(lgFC:0.12563FDR:0.94164) or m1_Man1b1(lgFC:-0.24747FDR:0.1805) or m1_Man1c1(lgFC:-0.37789FDR:0.80209)'
'm1_HMR_7320'	'm1_(alpha-D-mannosyl)5-beta-D-mannosyl-diacetylchitobiosyl-L-asparagine (protein) (C)[m1_g] + m1_H2O[m1_g] => m1_(alpha-D-mannosyl)4-beta-D-mannosyl-diacetylchitobiosyl-L-asparagine (protein)[m1_g] + m1_mannose[m1_g]'	0	0	0	NaN	NaN	'm1_N-glycan metabolism'	'm1_Man1a(lgFC:-0.23911FDR:0.96974) or m1_Man1a2(lgFC:0.12563FDR:0.94164) or m1_Man1b1(lgFC:-0.24747FDR:0.1805) or m1_Man1c1(lgFC:-0.37789FDR:0.80209)'
'm1_HMR_7321'	'm1_(alpha-D-mannosyl)5-beta-D-mannosyl-diacetylchitobiosyl-L-asparagine (protein) (B1)[m1_g] + m1_H2O[m1_g] => m1_(alpha-D-mannosyl)4-beta-D-mannosyl-diacetylchitobiosyl-L-asparagine (protein)[m1_g] + m1_mannose[m1_g]'	0	0	0	NaN	NaN	'm1_N-glycan metabolism'	'm1_Man1a(lgFC:-0.23911FDR:0.96974) or m1_Man1a2(lgFC:0.12563FDR:0.94164) or m1_Man1b1(lgFC:-0.24747FDR:0.1805) or m1_Man1c1(lgFC:-0.37789FDR:0.80209)'
'm1_HMR_7322'	'm1_(alpha-D-mannosyl)5-beta-D-mannosyl-diacetylchitobiosyl-L-asparagine (protein) (B2)[m1_g] + m1_H2O[m1_g] => m1_(alpha-D-mannosyl)4-beta-D-mannosyl-diacetylchitobiosyl-L-asparagine (protein)[m1_g] + m1_mannose[m1_g]'	0	0	0	NaN	NaN	'm1_N-glycan metabolism'	'm1_Man1a(lgFC:-0.23911FDR:0.96974) or m1_Man1a2(lgFC:0.12563FDR:0.94164) or m1_Man1b1(lgFC:-0.24747FDR:0.1805) or m1_Man1c1(lgFC:-0.37789FDR:0.80209)'
'm1_HMR_7323'	'm1_(alpha-D-mannosyl)4-beta-D-mannosyl-diacetylchitobiosyl-L-asparagine (protein)[m1_g] + m1_UDP-N-acetylglucosamine[m1_g] => m1_nm4masn[m1_g] + m1_UDP[m1_g]'	0	0	0	NaN	NaN	'm1_N-glycan metabolism'	'm1_Mgat1(lgFC:0.0081607FDR:1)'
'm1_HMR_7324'	'2 m1_H2O[m1_g] + m1_nm4masn[m1_g] => 2 m1_mannose[m1_g] + m1_nm2masn[m1_g]'	0	0	0	NaN	NaN	'm1_N-glycan metabolism'	'm1_Man2a1(lgFC:0.18888FDR:0.84751) or m1_Man2a2(lgFC:-0.84719FDR:0.39505)'
'm1_HMR_7325'	'm1_nm2masn[m1_g] + m1_UDP-N-acetylglucosamine[m1_g] => m1_n2m2masn[m1_g] + m1_UDP[m1_g]'	0	0	0	NaN	NaN	'm1_N-glycan metabolism'	'm1_Mgat2(lgFC:0.23893FDR:0.72859)'
'm1_HMR_7326'	'm1_n2m2masn[m1_g] + m1_UDP-N-acetylglucosamine[m1_g] => m1_n2m2nmasn[m1_g] + m1_UDP[m1_g]'	0	0	0	NaN	NaN	'm1_N-glycan metabolism'	'm1_Mgat3(lgFC:-0.011382FDR:1)'
'm1_HMR_7327'	'm1_n2m2masn[m1_g] + m1_UDP-N-acetylglucosamine[m1_g] => m1_G00020[m1_g] + m1_UDP[m1_g]'	0	0	0	NaN	NaN	'm1_N-glycan metabolism'	'm1_Mgat4a(lgFC:-0.63276FDR:0.61474) or m1_Mgat4b(lgFC:-0.21266FDR:0.64292)'
'm1_HMR_7328'	'm1_G00020[m1_g] + m1_UDP-N-acetylglucosamine[m1_g] => m1_G00021[m1_g] + m1_UDP[m1_g]'	0	0	0	NaN	NaN	'm1_N-glycan metabolism'	'm1_Mgat5(lgFC:0.019142FDR:1)'
'm1_HMR_7329'	'm1_G00021[m1_g] + m1_UDP-N-acetylglucosamine[m1_g] => m1_G00022[m1_g] + m1_UDP[m1_g]'	0	0	0	NaN	NaN	'm1_N-glycan metabolism'	''
'm1_HMR_7332'	'm1_GDP-L-fucose[m1_g] + m1_n2m2masn[m1_g] => m1_fn2m2masn[m1_g] + m1_GDP[m1_g]'	0	0	0	NaN	NaN	'm1_N-glycan metabolism'	'm1_Fut8(lgFC:0.034351FDR:1)'
'm1_HMR_7333'	'm1_fn2m2masn[m1_g] + 2 m1_UDP-galactose[m1_g] => m1_l2fn2m2masn[m1_g] + 2 m1_UDP[m1_g]'	0	0	0	NaN	NaN	'm1_N-glycan metabolism'	'm1_B4galt1(lgFC:0.30246FDR:0.69923) or m1_B4galt2(lgFC:-1.5645FDR:0.50968) or m1_B4galt5(lgFC:-0.47226FDR:0.58054)'
'm1_HMR_7334'	'2 m1_CMP-N-acetylneuraminate[m1_g] + m1_l2fn2m2masn[m1_g] => 2 m1_CMP[m1_g] + m1_PA6[m1_g]'	0	0	0	NaN	NaN	'm1_N-glycan metabolism'	'm1_St6gal1(lgFC:-0.46417FDR:0.89654)'
'm1_HMR_7428'	'm1_(alpha-D-mannosyl)2-beta-D-mannosyl-N-acetylglucosamine[m1_l] + 2 m1_H2O[m1_l] => m1_beta-1,4-mannose-N-acetylglucosamine[m1_l] + 2 m1_mannose[m1_l]'	0	0	0	NaN	NaN	'm1_N-glycan metabolism'	'm1_Man2b1(lgFC:-0.29358FDR:0.36383) or m1_Man2c1(lgFC:0.12324FDR:0.97637)'
'm1_HMR_7429'	'm1_beta-1,4-mannose-N-acetylglucosamine[m1_l] + m1_H2O[m1_l] => m1_mannose[m1_l] + m1_N-acetylglucosamine[m1_l]'	0	0	0	NaN	NaN	'm1_N-glycan metabolism'	'm1_Manba(lgFC:-0.088046FDR:0.99096)'
'm1_HMR_7574'	'm1_de-Fuc form of PA6[m1_l] + m1_H2O[m1_l] => m1_[protein]-L-asparagine[m1_l] + m1_de-Fuc form of PA6 (wo peptide linkage)[m1_l]'	0	0	0	NaN	NaN	'm1_N-glycan metabolism'	'm1_Aga(lgFC:-0.27723FDR:0.49838)'
'm1_HMR_7575'	'm1_de-Fuc form of PA6 (wo peptide linkage)[m1_l] + m1_H2O[m1_l] => m1_de-Fuc, GlcNAc removed PA6 (wo peptide linkage)[m1_l] + m1_N-acetylglucosamine[m1_l]'	0	0	0	NaN	NaN	'm1_N-glycan metabolism'	'm1_Engase(lgFC:0.65225FDR:0.92936)'
'm1_HMR_7576'	'm1_de-Fuc, GlcNAc removed PA6 (wo peptide linkage)[m1_l] + 2 m1_H2O[m1_l] => m1_l2n2m2mn[m1_l] + 2 m1_N-acetylneuraminate[m1_l]'	0	0	0	NaN	NaN	'm1_N-glycan metabolism'	'm1_Ctsa(lgFC:-0.045497FDR:0.99096) or m1_Glb1(lgFC:-0.30261FDR:0.80209) or m1_Neu1(lgFC:-0.21735FDR:0.78673) or m1_Neu2(lgFC:0.33479FDR:0.9302) or m1_Neu3(lgFC:0.53399FDR:0.43241)'
'm1_HMR_7577'	'2 m1_H2O[m1_l] + m1_l2n2m2mn[m1_l] => 2 m1_galactose[m1_l] + m1_n2m2mn[m1_l]'	0	0	0	NaN	NaN	'm1_N-glycan metabolism'	'm1_Ctsa(lgFC:-0.045497FDR:0.99096) or m1_Galns(lgFC:-0.54413FDR:0.17155) or m1_Glb1(lgFC:-0.30261FDR:0.80209) or m1_Neu1(lgFC:-0.21735FDR:0.78673)'
'm1_HMR_7578'	'2 m1_H2O[m1_l] + m1_n2m2mn[m1_l] => m1_(alpha-D-mannosyl)2-beta-D-mannosyl-N-acetylglucosamine[m1_l] + 2 m1_N-acetylglucosamine[m1_l]'	0	0	0	NaN	NaN	'm1_N-glycan metabolism'	'm1_Hexa(lgFC:-0.26348FDR:0.42295) or m1_Hexb(lgFC:-0.33583FDR:0.57088)'
'm1_HMR_7580'	'm1_H2O[m1_s] + m1_PA6[m1_s] => m1_6-deoxy-L-galactose[m1_s] + m1_de-Fuc form of PA6[m1_s]'	0	0	0	NaN	NaN	'm1_N-glycan metabolism'	'm1_Fuca1(lgFC:0.039061FDR:1) or m1_Fuca2(lgFC:-0.28248FDR:0.87031)'
'm1_HMR_7582'	'm1_H2O[m1_l] + m1_PA6[m1_l] => m1_6-deoxy-L-galactose[m1_l] + m1_de-Fuc form of PA6[m1_l]'	0	0	0	NaN	NaN	'm1_N-glycan metabolism'	'm1_Fuca1(lgFC:0.039061FDR:1) or m1_Fuca2(lgFC:-0.28248FDR:0.87031)'
'm1_HMR_7585'	'm1_H2O[m1_l] + m1_n2m2nmasn[m1_l] => m1_[protein]-L-asparagine[m1_l] + m1_n2m2nm[m1_l]'	0	0	0	NaN	NaN	'm1_N-glycan metabolism'	'm1_Aga(lgFC:-0.27723FDR:0.49838)'
'm1_HMR_7586'	'm1_H2O[m1_l] + m1_n2m2nm[m1_l] => m1_n2m2nmn[m1_l] + m1_N-acetylglucosamine[m1_l]'	0	0	0	NaN	NaN	'm1_N-glycan metabolism'	'm1_Engase(lgFC:0.65225FDR:0.92936)'
'm1_HMR_7587'	'3 m1_H2O[m1_l] + m1_n2m2nmn[m1_l] => m1_(alpha-D-mannosyl)2-beta-D-mannosyl-N-acetylglucosamine[m1_l] + 3 m1_N-acetylglucosamine[m1_l]'	0	0	0	NaN	NaN	'm1_N-glycan metabolism'	'm1_Hexa(lgFC:-0.26348FDR:0.42295) or m1_Hexb(lgFC:-0.33583FDR:0.57088)'
'm1_HMR_8691'	'm1_dolichyl-diphosphate[m1_r] + m1_H2O[m1_r] => m1_dolichyl-phosphate[m1_r] + m1_Pi[m1_r]'	0	0	0	NaN	NaN	'm1_N-glycan metabolism'	'm1_Dolpp1(lgFC:-0.062753FDR:1)'
'm1_HMR_8692'	'm1_dolichyl-D-glucosyl-phosphate[m1_r] + m1_H2O[m1_r] => m1_dolichyl-phosphate[m1_r] + m1_glucose[m1_r]'	0	0	0	NaN	NaN	'm1_N-glycan metabolism'	''
'm1_HMR_8693'	'm1_n2m2masn[m1_g] + m1_UDP-N-acetylglucosamine[m1_g] => m1_n3m2masn[m1_g] + m1_UDP[m1_g]'	0	0	0	NaN	NaN	'm1_N-glycan metabolism'	'm1_Mgat4a(lgFC:-0.63276FDR:0.61474) or m1_Mgat4b(lgFC:-0.21266FDR:0.64292)'
'm1_HMR_8694'	'm1_n3m2masn[m1_g] + m1_UDP-N-acetylglucosamine[m1_g] => m1_n4m2masn[m1_g] + m1_UDP[m1_g]'	0	0	0	NaN	NaN	'm1_N-glycan metabolism'	'm1_Mgat5(lgFC:0.019142FDR:1)'
'm1_HMR_8695'	'm1_n4m2masn[m1_g] + m1_UDP-N-acetylglucosamine[m1_g] => m1_n5m2masn[m1_g] + m1_UDP[m1_g]'	0	0	0	NaN	NaN	'm1_N-glycan metabolism'	''
'm1_HMR_5151'	'1827 m1_ATP[m1_c] + 13 m1_glycyl-tRNA(gly)[m1_c] + 2436 m1_H2O[m1_c] + 63 m1_L-alanyl-tRNA(ala)[m1_c] + 27 m1_L-arginyl-tRNA(arg)[m1_c] + 17 m1_L-asparaginyl-tRNA(asn)[m1_c] + 36 m1_L-aspartyl-tRNA(asp)[m1_c] + 35 m1_L-cysteinyl-tRNA(cys)[m1_c] + 20 m1_L-glutaminyl-tRNA(gln)[m1_c] + 62 m1_L-glutamyl-tRNA(glu)[m1_c] + 16 m1_L-histidyl-tRNA(his)[m1_c] + 9 m1_L-isoleucyl-tRNA(ile)[m1_c] + 64 m1_L-l…	0	0	0	NaN	NaN	'm1_Protein assembly'	''
'm1_HMR_5152'	'1269 m1_ATP[m1_c] + 16 m1_glycyl-tRNA(gly)[m1_c] + 1692 m1_H2O[m1_c] + 34 m1_L-alanyl-tRNA(ala)[m1_c] + 16 m1_L-arginyl-tRNA(arg)[m1_c] + 19 m1_L-asparaginyl-tRNA(asn)[m1_c] + 25 m1_L-aspartyl-tRNA(asp)[m1_c] + 3 m1_L-cysteinyl-tRNA(cys)[m1_c] + 17 m1_L-glutaminyl-tRNA(gln)[m1_c] + 29 m1_L-glutamyl-tRNA(glu)[m1_c] + 9 m1_L-histidyl-tRNA(his)[m1_c] + 20 m1_L-isoleucyl-tRNA(ile)[m1_c] + 59 m1_L-le…	0	0	0	NaN	NaN	'm1_Protein assembly'	''
'm1_HMR_5153'	'1254 m1_ATP[m1_c] + 24 m1_glycyl-tRNA(gly)[m1_c] + 1672 m1_H2O[m1_c] + 26 m1_L-alanyl-tRNA(ala)[m1_c] + 7 m1_L-arginyl-tRNA(arg)[m1_c] + 19 m1_L-asparaginyl-tRNA(asn)[m1_c] + 24 m1_L-aspartyl-tRNA(asp)[m1_c] + 3 m1_L-cysteinyl-tRNA(cys)[m1_c] + 18 m1_L-glutaminyl-tRNA(gln)[m1_c] + 32 m1_L-glutamyl-tRNA(glu)[m1_c] + 13 m1_L-histidyl-tRNA(his)[m1_c] + 20 m1_L-isoleucyl-tRNA(ile)[m1_c] + 51 m1_L-le…	0	0	0	NaN	NaN	'm1_Protein assembly'	''
'm1_HMR_5154'	'13683 m1_ATP[m1_c] + 207 m1_glycyl-tRNA(gly)[m1_c] + 18244 m1_H2O[m1_c] + 275 m1_L-alanyl-tRNA(ala)[m1_c] + 150 m1_L-arginyl-tRNA(arg)[m1_c] + 247 m1_L-asparaginyl-tRNA(asn)[m1_c] + 233 m1_L-aspartyl-tRNA(asp)[m1_c] + 25 m1_L-cysteinyl-tRNA(cys)[m1_c] + 230 m1_L-glutaminyl-tRNA(gln)[m1_c] + 298 m1_L-glutamyl-tRNA(glu)[m1_c] + 115 m1_L-histidyl-tRNA(his)[m1_c] + 285 m1_L-isoleucyl-tRNA(ile)[m1_c]…	0	0	0	NaN	NaN	'm1_Protein assembly'	''
'm1_HMR_5155'	'372 m1_ATP[m1_c] + 6 m1_glycyl-tRNA(gly)[m1_c] + 496 m1_H2O[m1_c] + 11 m1_L-alanyl-tRNA(ala)[m1_c] + 9 m1_L-arginyl-tRNA(arg)[m1_c] + m1_L-asparaginyl-tRNA(asn)[m1_c] + 8 m1_L-aspartyl-tRNA(asp)[m1_c] + 2 m1_L-cysteinyl-tRNA(cys)[m1_c] + 7 m1_L-glutaminyl-tRNA(gln)[m1_c] + 5 m1_L-glutamyl-tRNA(glu)[m1_c] + m1_L-histidyl-tRNA(his)[m1_c] + 4 m1_L-isoleucyl-tRNA(ile)[m1_c] + 20 m1_L-leucyl-tRNA(leu…	0	0	0	NaN	NaN	'm1_Protein assembly'	''
'm1_HMR_5156'	'261 m1_ATP[m1_c] + 3 m1_glycyl-tRNA(gly)[m1_c] + 348 m1_H2O[m1_c] + 3 m1_L-alanyl-tRNA(ala)[m1_c] + m1_L-arginyl-tRNA(arg)[m1_c] + m1_L-asparaginyl-tRNA(asn)[m1_c] + 13 m1_L-aspartyl-tRNA(asp)[m1_c] + m1_L-cysteinyl-tRNA(cys)[m1_c] + 3 m1_L-glutaminyl-tRNA(gln)[m1_c] + 9 m1_L-glutamyl-tRNA(glu)[m1_c] + m1_L-histidyl-tRNA(his)[m1_c] + 8 m1_L-isoleucyl-tRNA(ile)[m1_c] + 10 m1_L-leucyl-tRNA(leu)[m1…	0	0	0	NaN	NaN	'm1_Protein assembly'	''
'm1_HMR_5157'	'249 m1_ATP[m1_c] + 3 m1_glycyl-tRNA(gly)[m1_c] + 332 m1_H2O[m1_c] + 5 m1_L-alanyl-tRNA(ala)[m1_c] + 4 m1_L-arginyl-tRNA(arg)[m1_c] + m1_L-asparaginyl-tRNA(asn)[m1_c] + 4 m1_L-aspartyl-tRNA(asp)[m1_c] + 3 m1_L-glutaminyl-tRNA(gln)[m1_c] + 8 m1_L-glutamyl-tRNA(glu)[m1_c] + 4 m1_L-isoleucyl-tRNA(ile)[m1_c] + 12 m1_L-leucyl-tRNA(leu)[m1_c] + 9 m1_L-lysyl-tRNA(lys)[m1_c] + 2 m1_L-methionyl-tRNA(met)[…	0	0	0	NaN	NaN	'm1_Protein assembly'	''
'm1_HMR_5158'	'303 m1_ATP[m1_c] + 5 m1_glycyl-tRNA(gly)[m1_c] + 404 m1_H2O[m1_c] + 7 m1_L-alanyl-tRNA(ala)[m1_c] + 2 m1_L-arginyl-tRNA(arg)[m1_c] + m1_L-asparaginyl-tRNA(asn)[m1_c] + 4 m1_L-aspartyl-tRNA(asp)[m1_c] + 8 m1_L-glutaminyl-tRNA(gln)[m1_c] + 8 m1_L-glutamyl-tRNA(glu)[m1_c] + m1_L-isoleucyl-tRNA(ile)[m1_c] + 15 m1_L-leucyl-tRNA(leu)[m1_c] + 6 m1_L-lysyl-tRNA(lys)[m1_c] + 3 m1_L-methionyl-tRNA(met)[m1…	0	0	0	NaN	NaN	'm1_Protein assembly'	''
'm1_HMR_5159'	'297 m1_ATP[m1_c] + 3 m1_glycyl-tRNA(gly)[m1_c] + 396 m1_H2O[m1_c] + 15 m1_L-alanyl-tRNA(ala)[m1_c] + 4 m1_L-arginyl-tRNA(arg)[m1_c] + 7 m1_L-aspartyl-tRNA(asp)[m1_c] + 6 m1_L-glutaminyl-tRNA(gln)[m1_c] + 5 m1_L-glutamyl-tRNA(glu)[m1_c] + m1_L-histidyl-tRNA(his)[m1_c] + 11 m1_L-leucyl-tRNA(leu)[m1_c] + 6 m1_L-lysyl-tRNA(lys)[m1_c] + 3 m1_L-methionyl-tRNA(met)[m1_c] + 4 m1_L-phenylalanyl-tRNA(phe)…	0	0	0	NaN	NaN	'm1_Protein assembly'	''
'm1_HMR_5160'	'8022 m1_ATP[m1_c] + 262 m1_glycyl-tRNA(gly)[m1_c] + 10696 m1_H2O[m1_c] + 134 m1_L-alanyl-tRNA(ala)[m1_c] + 134 m1_L-arginyl-tRNA(arg)[m1_c] + 138 m1_L-asparaginyl-tRNA(asn)[m1_c] + 176 m1_L-aspartyl-tRNA(asp)[m1_c] + 48 m1_L-cysteinyl-tRNA(cys)[m1_c] + 110 m1_L-glutaminyl-tRNA(gln)[m1_c] + 186 m1_L-glutamyl-tRNA(glu)[m1_c] + 62 m1_L-histidyl-tRNA(his)[m1_c] + 104 m1_L-isoleucyl-tRNA(ile)[m1_c] +…	0	0	0	NaN	NaN	'm1_Protein assembly'	''
'm1_HMR_5161'	'1218 m1_ATP[m1_c] + 31 m1_glycyl-tRNA(gly)[m1_c] + 1624 m1_H2O[m1_c] + 30 m1_L-alanyl-tRNA(ala)[m1_c] + 9 m1_L-arginyl-tRNA(arg)[m1_c] + 21 m1_L-asparaginyl-tRNA(asn)[m1_c] + 25 m1_L-aspartyl-tRNA(asp)[m1_c] + 12 m1_L-cysteinyl-tRNA(cys)[m1_c] + 17 m1_L-glutaminyl-tRNA(gln)[m1_c] + 25 m1_L-glutamyl-tRNA(glu)[m1_c] + 13 m1_L-histidyl-tRNA(his)[m1_c] + 18 m1_L-isoleucyl-tRNA(ile)[m1_c] + 31 m1_L-l…	0	0	0	NaN	NaN	'm1_Protein assembly'	''
'm1_HMR_5162'	'2430 m1_ATP[m1_c] + 62 m1_glycyl-tRNA(gly)[m1_c] + 3240 m1_H2O[m1_c] + 37 m1_L-alanyl-tRNA(ala)[m1_c] + 42 m1_L-arginyl-tRNA(arg)[m1_c] + 40 m1_L-asparaginyl-tRNA(asn)[m1_c] + 36 m1_L-aspartyl-tRNA(asp)[m1_c] + 48 m1_L-cysteinyl-tRNA(cys)[m1_c] + 31 m1_L-glutaminyl-tRNA(gln)[m1_c] + 56 m1_L-glutamyl-tRNA(glu)[m1_c] + 24 m1_L-histidyl-tRNA(his)[m1_c] + 22 m1_L-isoleucyl-tRNA(ile)[m1_c] + 48 m1_L-…	0	0	0	NaN	NaN	'm1_Protein assembly'	''
'm1_HMR_5163'	'1866 m1_ATP[m1_c] + 49 m1_glycyl-tRNA(gly)[m1_c] + 2488 m1_H2O[m1_c] + 42 m1_L-alanyl-tRNA(ala)[m1_c] + 44 m1_L-arginyl-tRNA(arg)[m1_c] + 25 m1_L-asparaginyl-tRNA(asn)[m1_c] + 35 m1_L-aspartyl-tRNA(asp)[m1_c] + 26 m1_L-cysteinyl-tRNA(cys)[m1_c] + 26 m1_L-glutaminyl-tRNA(gln)[m1_c] + 51 m1_L-glutamyl-tRNA(glu)[m1_c] + 13 m1_L-histidyl-tRNA(his)[m1_c] + 22 m1_L-isoleucyl-tRNA(ile)[m1_c] + 51 m1_L-…	0	0	0	NaN	NaN	'm1_Protein assembly'	''
'm1_HMR_5164'	'2094 m1_ATP[m1_c] + 52 m1_glycyl-tRNA(gly)[m1_c] + 2792 m1_H2O[m1_c] + 61 m1_L-alanyl-tRNA(ala)[m1_c] + 27 m1_L-arginyl-tRNA(arg)[m1_c] + 34 m1_L-asparaginyl-tRNA(asn)[m1_c] + 45 m1_L-aspartyl-tRNA(asp)[m1_c] + 40 m1_L-cysteinyl-tRNA(cys)[m1_c] + 17 m1_L-glutaminyl-tRNA(gln)[m1_c] + 42 m1_L-glutamyl-tRNA(glu)[m1_c] + 19 m1_L-histidyl-tRNA(his)[m1_c] + 15 m1_L-isoleucyl-tRNA(ile)[m1_c] + 65 m1_L-…	0	0	0	NaN	NaN	'm1_Protein assembly'	''
'm1_HMR_5165'	'951 m1_ATP[m1_c] + 18 m1_glycyl-tRNA(gly)[m1_c] + 1268 m1_H2O[m1_c] + 39 m1_L-alanyl-tRNA(ala)[m1_c] + 34 m1_L-arginyl-tRNA(arg)[m1_c] + m1_L-asparaginyl-tRNA(asn)[m1_c] + 11 m1_L-aspartyl-tRNA(asp)[m1_c] + 2 m1_L-cysteinyl-tRNA(cys)[m1_c] + 32 m1_L-glutaminyl-tRNA(gln)[m1_c] + 40 m1_L-glutamyl-tRNA(glu)[m1_c] + 2 m1_L-histidyl-tRNA(his)[m1_c] + 2 m1_L-isoleucyl-tRNA(ile)[m1_c] + 41 m1_L-leucyl-…	0	0	0	NaN	NaN	'm1_Protein assembly'	''
'm1_HMR_5166'	'801 m1_ATP[m1_c] + 11 m1_glycyl-tRNA(gly)[m1_c] + 1068 m1_H2O[m1_c] + 23 m1_L-alanyl-tRNA(ala)[m1_c] + 17 m1_L-arginyl-tRNA(arg)[m1_c] + 5 m1_L-asparaginyl-tRNA(asn)[m1_c] + 16 m1_L-aspartyl-tRNA(asp)[m1_c] + 19 m1_L-glutaminyl-tRNA(gln)[m1_c] + 30 m1_L-glutamyl-tRNA(glu)[m1_c] + 6 m1_L-histidyl-tRNA(his)[m1_c] + 41 m1_L-leucyl-tRNA(leu)[m1_c] + 22 m1_L-lysyl-tRNA(lys)[m1_c] + 4 m1_L-methionyl-t…	0	0	0	NaN	NaN	'm1_Protein assembly'	''
'm1_HMR_5167'	'315 m1_ATP[m1_c] + 5 m1_glycyl-tRNA(gly)[m1_c] + 420 m1_H2O[m1_c] + 8 m1_L-alanyl-tRNA(ala)[m1_c] + 3 m1_L-asparaginyl-tRNA(asn)[m1_c] + 7 m1_L-aspartyl-tRNA(asp)[m1_c] + 5 m1_L-cysteinyl-tRNA(cys)[m1_c] + 5 m1_L-glutaminyl-tRNA(gln)[m1_c] + 10 m1_L-glutamyl-tRNA(glu)[m1_c] + m1_L-histidyl-tRNA(his)[m1_c] + 4 m1_L-isoleucyl-tRNA(ile)[m1_c] + 6 m1_L-leucyl-tRNA(leu)[m1_c] + 12 m1_L-lysyl-tRNA(lys…	0	0	0	NaN	NaN	'm1_Protein assembly'	''
'm1_HMR_5168'	'498 m1_ATP[m1_c] + 10 m1_glycyl-tRNA(gly)[m1_c] + 664 m1_H2O[m1_c] + 11 m1_L-alanyl-tRNA(ala)[m1_c] + 9 m1_L-arginyl-tRNA(arg)[m1_c] + 4 m1_L-asparaginyl-tRNA(asn)[m1_c] + 12 m1_L-aspartyl-tRNA(asp)[m1_c] + 3 m1_L-cysteinyl-tRNA(cys)[m1_c] + 10 m1_L-glutaminyl-tRNA(gln)[m1_c] + 6 m1_L-glutamyl-tRNA(glu)[m1_c] + 3 m1_L-histidyl-tRNA(his)[m1_c] + 9 m1_L-isoleucyl-tRNA(ile)[m1_c] + 15 m1_L-leucyl-t…	0	0	0	NaN	NaN	'm1_Protein assembly'	''
'm1_HMR_5169'	'855 m1_ATP[m1_c] + 21 m1_glycyl-tRNA(gly)[m1_c] + 1140 m1_H2O[m1_c] + 21 m1_L-alanyl-tRNA(ala)[m1_c] + 20 m1_L-arginyl-tRNA(arg)[m1_c] + 11 m1_L-asparaginyl-tRNA(asn)[m1_c] + 10 m1_L-aspartyl-tRNA(asp)[m1_c] + 5 m1_L-cysteinyl-tRNA(cys)[m1_c] + 17 m1_L-glutaminyl-tRNA(gln)[m1_c] + 22 m1_L-glutamyl-tRNA(glu)[m1_c] + 6 m1_L-histidyl-tRNA(his)[m1_c] + 10 m1_L-isoleucyl-tRNA(ile)[m1_c] + 31 m1_L-leu…	0	0	0	NaN	NaN	'm1_Protein assembly'	''
'm1_HMR_5170'	'579 m1_ATP[m1_c] + 13 m1_glycyl-tRNA(gly)[m1_c] + 772 m1_H2O[m1_c] + 10 m1_L-alanyl-tRNA(ala)[m1_c] + 4 m1_L-arginyl-tRNA(arg)[m1_c] + 3 m1_L-asparaginyl-tRNA(asn)[m1_c] + 9 m1_L-aspartyl-tRNA(asp)[m1_c] + 8 m1_L-cysteinyl-tRNA(cys)[m1_c] + 4 m1_L-glutaminyl-tRNA(gln)[m1_c] + 11 m1_L-glutamyl-tRNA(glu)[m1_c] + 3 m1_L-histidyl-tRNA(his)[m1_c] + 12 m1_L-isoleucyl-tRNA(ile)[m1_c] + 28 m1_L-leucyl-t…	0	0	0	NaN	NaN	'm1_Protein assembly'	''
'm1_HMR_5171'	'975 m1_ATP[m1_c] + 28 m1_glycyl-tRNA(gly)[m1_c] + 1300 m1_H2O[m1_c] + 38 m1_L-alanyl-tRNA(ala)[m1_c] + 23 m1_L-arginyl-tRNA(arg)[m1_c] + 5 m1_L-asparaginyl-tRNA(asn)[m1_c] + 14 m1_L-aspartyl-tRNA(asp)[m1_c] + 6 m1_L-cysteinyl-tRNA(cys)[m1_c] + 7 m1_L-glutaminyl-tRNA(gln)[m1_c] + 15 m1_L-glutamyl-tRNA(glu)[m1_c] + 10 m1_L-histidyl-tRNA(his)[m1_c] + 6 m1_L-isoleucyl-tRNA(ile)[m1_c] + 37 m1_L-leucy…	0	0	0	NaN	NaN	'm1_Protein assembly'	''
'm1_HMR_5172'	'1050 m1_ATP[m1_c] + 18 m1_glycyl-tRNA(gly)[m1_c] + 1400 m1_H2O[m1_c] + 22 m1_L-alanyl-tRNA(ala)[m1_c] + 12 m1_L-arginyl-tRNA(arg)[m1_c] + 12 m1_L-asparaginyl-tRNA(asn)[m1_c] + 26 m1_L-aspartyl-tRNA(asp)[m1_c] + 6 m1_L-cysteinyl-tRNA(cys)[m1_c] + 14 m1_L-glutaminyl-tRNA(gln)[m1_c] + 15 m1_L-glutamyl-tRNA(glu)[m1_c] + 9 m1_L-histidyl-tRNA(his)[m1_c] + 12 m1_L-isoleucyl-tRNA(ile)[m1_c] + 39 m1_L-le…	0	0	0	NaN	NaN	'm1_Protein assembly'	''
'm1_HMR_5173'	'1404 m1_ATP[m1_c] + 28 m1_glycyl-tRNA(gly)[m1_c] + 1872 m1_H2O[m1_c] + 31 m1_L-alanyl-tRNA(ala)[m1_c] + 19 m1_L-arginyl-tRNA(arg)[m1_c] + 19 m1_L-asparaginyl-tRNA(asn)[m1_c] + 27 m1_L-aspartyl-tRNA(asp)[m1_c] + 19 m1_L-cysteinyl-tRNA(cys)[m1_c] + 16 m1_L-glutaminyl-tRNA(gln)[m1_c] + 34 m1_L-glutamyl-tRNA(glu)[m1_c] + 13 m1_L-histidyl-tRNA(his)[m1_c] + 29 m1_L-isoleucyl-tRNA(ile)[m1_c] + 47 m1_L-…	0	0	0	NaN	NaN	'm1_Protein assembly'	''
'm1_HMR_7282'	'm1_asparagine[m1_c] => m1_[protein]-L-asparagine[m1_c] + m1_H2O[m1_c]'	0	0	0	NaN	NaN	'm1_Protein modification'	''
'm1_HMR_7617'	'm1_[protein]-L-tyrosine[m1_c] + m1_ATP[m1_c] => m1_[protein]-tyrosine-phosphate[m1_c] + m1_ADP[m1_c]'	0	0	0	NaN	NaN	'm1_Protein modification'	'm1_Abl1(lgFC:-0.15726FDR:0.76582) or m1_Abl2(lgFC:0.21118FDR:0.8154) or m1_Axl(lgFC:-0.42383FDR:0.52798) or m1_Blk(lgFC:-0.40533FDR:0.98278) or m1_Bmx(lgFC:0.77949FDR:0.81358) or m1_Clk1(lgFC:0.13843FDR:0.99146) or m1_Clk3(lgFC:-0.18244FDR:0.67454) or m1_Clk4(lgFC:0.19656FDR:0.69495) or m1_Csf1r(lgFC:-0.60496FDR:0.40598) or m1_Csk(lgFC:-0.23527FDR:0.62782) or m1_Ddr1(lgFC:0.049069FDR:1) or m1_Dy…
'm1_HMR_7618'	'm1_[protein]-tyrosine-phosphate[m1_c] + m1_H2O[m1_c] => m1_[protein]-L-tyrosine[m1_c] + m1_Pi[m1_c]'	0	0	0	NaN	NaN	'm1_Protein modification'	'm1_Acp1(lgFC:-0.12559FDR:0.80509) or m1_Cdc14a(lgFC:0.38157FDR:0.81109) or m1_Cdc25a(lgFC:-0.43208FDR:0.58162) or m1_Dusp1(lgFC:-0.60471FDR:0.64893) or m1_Dusp10(lgFC:-0.053347FDR:1) or m1_Dusp14(lgFC:-0.25042FDR:0.99096) or m1_Dusp16(lgFC:-0.18667FDR:0.80093) or m1_Dusp18(lgFC:-0.89925FDR:0.9201) or m1_Dusp19(lgFC:-0.23826FDR:0.91489) or m1_Dusp22(lgFC:-0.022481FDR:1) or m1_Dusp23(lgFC:0.16743F…
'm1_HMR_9735'	'm1_[protein]-L-citrulline[m1_c] + m1_H2O[m1_c] => m1_citrulline[m1_c]'	0	0	0	NaN	NaN	'm1_Protein modification'	''
'm1_HMR_7621'	'm1_arginine[m1_c] => m1_[protein]-L-arginine[m1_c] + m1_H2O[m1_c]'	0	0	0	NaN	NaN	'm1_Protein modification'	''
'm1_HMR_7622'	'm1_[protein]-L-arginine[m1_c] + m1_H2O[m1_c] => m1_[protein]-L-citrulline[m1_c] + m1_NH3[m1_c]'	0	0	0	NaN	NaN	'm1_Protein modification'	'm1_Padi2(lgFC:0.8454FDR:0.89108)'
'm1_HMR_7624'	'm1_[protein]-omega-N-(ADP-D-ribosyl)-L-arginine[m1_c] + m1_H2O[m1_c] => m1_[protein]-L-arginine[m1_c] + m1_ADP-ribose[m1_c]'	0	0	0	NaN	NaN	'm1_Protein modification'	''
'm1_HMR_7626'	'm1_H2O[m1_c] + m1_N(omega)-(ADP-D-ribosyl)-L-arginine[m1_c] => m1_ADP-ribose[m1_c] + m1_arginine[m1_c]'	0	0	0	NaN	NaN	'm1_Protein modification'	''
'm1_HMR_5258'	'm1_albumin[m1_c] + 304 m1_ATP[m1_c] + 304 m1_H2O[m1_c] => 304 m1_ADP[m1_c] + 63 m1_alanine[m1_c] + 27 m1_arginine[m1_c] + 17 m1_asparagine[m1_c] + 36 m1_aspartate[m1_c] + 35 m1_cysteine[m1_c] + 62 m1_glutamate[m1_c] + 20 m1_glutamine[m1_c] + 13 m1_glycine[m1_c] + 16 m1_histidine[m1_c] + 9 m1_isoleucine[m1_c] + 64 m1_leucine[m1_c] + 60 m1_lysine[m1_c] + 7 m1_methionine[m1_c] + 35 m1_phenylalanine…	0	0	0	NaN	NaN	'm1_Protein degradation'	''
'm1_HMR_5259'	'm1_albumin[m1_l] + 304 m1_ATP[m1_l] + 304 m1_H2O[m1_l] => 304 m1_ADP[m1_l] + 63 m1_alanine[m1_l] + 27 m1_arginine[m1_l] + 17 m1_asparagine[m1_l] + 36 m1_aspartate[m1_l] + 35 m1_cysteine[m1_l] + 62 m1_glutamate[m1_l] + 20 m1_glutamine[m1_l] + 13 m1_glycine[m1_l] + 16 m1_histidine[m1_l] + 9 m1_isoleucine[m1_l] + 64 m1_leucine[m1_l] + 60 m1_lysine[m1_l] + 7 m1_methionine[m1_l] + 35 m1_phenylalanine…	0	0	0	NaN	NaN	'm1_Protein degradation'	'm1_Ctsa(lgFC:-0.045497FDR:0.99096) or m1_Ctsb(lgFC:-0.53977FDR:0.06298) or m1_Ctsc(lgFC:-0.35594FDR:0.74715) or m1_Ctsd(lgFC:-0.13352FDR:0.86921) or m1_Ctsf(lgFC:0.10915FDR:0.95003) or m1_Ctsh(lgFC:-0.31487FDR:0.91744) or m1_Ctsk(lgFC:-0.42819FDR:0.88209) or m1_Ctsl(lgFC:0.35738FDR:0.48755) or m1_Ctso(lgFC:0.061768FDR:1) or m1_Ctsz(lgFC:-0.30768FDR:0.68345) or m1_Tpp1(lgFC:-0.030875FDR:1)'
'm1_HMR_5260'	'm1_antichymotrypsin[m1_c] + 211 m1_ATP[m1_c] + 211 m1_H2O[m1_c] => 211 m1_ADP[m1_c] + 34 m1_alanine[m1_c] + 16 m1_arginine[m1_c] + 19 m1_asparagine[m1_c] + 25 m1_aspartate[m1_c] + 3 m1_cysteine[m1_c] + 29 m1_glutamate[m1_c] + 17 m1_glutamine[m1_c] + 16 m1_glycine[m1_c] + 9 m1_histidine[m1_c] + 20 m1_isoleucine[m1_c] + 59 m1_leucine[m1_c] + 26 m1_lysine[m1_c] + 14 m1_methionine[m1_c] + 25 m1_phen…	0	0	0	NaN	NaN	'm1_Protein degradation'	''
'm1_HMR_5261'	'm1_antichymotrypsin[m1_l] + 211 m1_ATP[m1_l] + 211 m1_H2O[m1_l] => 211 m1_ADP[m1_l] + 34 m1_alanine[m1_l] + 16 m1_arginine[m1_l] + 19 m1_asparagine[m1_l] + 25 m1_aspartate[m1_l] + 3 m1_cysteine[m1_l] + 29 m1_glutamate[m1_l] + 17 m1_glutamine[m1_l] + 16 m1_glycine[m1_l] + 9 m1_histidine[m1_l] + 20 m1_isoleucine[m1_l] + 59 m1_leucine[m1_l] + 26 m1_lysine[m1_l] + 14 m1_methionine[m1_l] + 25 m1_phen…	0	0	0	NaN	NaN	'm1_Protein degradation'	'm1_Ctsa(lgFC:-0.045497FDR:0.99096) or m1_Ctsb(lgFC:-0.53977FDR:0.06298) or m1_Ctsc(lgFC:-0.35594FDR:0.74715) or m1_Ctsd(lgFC:-0.13352FDR:0.86921) or m1_Ctsf(lgFC:0.10915FDR:0.95003) or m1_Ctsh(lgFC:-0.31487FDR:0.91744) or m1_Ctsk(lgFC:-0.42819FDR:0.88209) or m1_Ctsl(lgFC:0.35738FDR:0.48755) or m1_Ctso(lgFC:0.061768FDR:1) or m1_Ctsz(lgFC:-0.30768FDR:0.68345) or m1_Tpp1(lgFC:-0.030875FDR:1)'
'm1_HMR_5262'	'm1_antitrypsin[m1_c] + 209 m1_ATP[m1_c] + 209 m1_H2O[m1_c] => 209 m1_ADP[m1_c] + 26 m1_alanine[m1_c] + 7 m1_arginine[m1_c] + 19 m1_asparagine[m1_c] + 24 m1_aspartate[m1_c] + 3 m1_cysteine[m1_c] + 32 m1_glutamate[m1_c] + 18 m1_glutamine[m1_c] + 24 m1_glycine[m1_c] + 13 m1_histidine[m1_c] + 20 m1_isoleucine[m1_c] + 51 m1_leucine[m1_c] + 34 m1_lysine[m1_c] + 10 m1_methionine[m1_c] + 27 m1_phenylala…	0	0	0	NaN	NaN	'm1_Protein degradation'	''
'm1_HMR_5263'	'm1_antitrypsin[m1_l] + 209 m1_ATP[m1_l] + 209 m1_H2O[m1_l] => 209 m1_ADP[m1_l] + 26 m1_alanine[m1_l] + 7 m1_arginine[m1_l] + 19 m1_asparagine[m1_l] + 24 m1_aspartate[m1_l] + 3 m1_cysteine[m1_l] + 32 m1_glutamate[m1_l] + 18 m1_glutamine[m1_l] + 24 m1_glycine[m1_l] + 13 m1_histidine[m1_l] + 20 m1_isoleucine[m1_l] + 51 m1_leucine[m1_l] + 34 m1_lysine[m1_l] + 10 m1_methionine[m1_l] + 27 m1_phenylala…	0	0	0	NaN	NaN	'm1_Protein degradation'	'm1_Ctsa(lgFC:-0.045497FDR:0.99096) or m1_Ctsb(lgFC:-0.53977FDR:0.06298) or m1_Ctsc(lgFC:-0.35594FDR:0.74715) or m1_Ctsd(lgFC:-0.13352FDR:0.86921) or m1_Ctsf(lgFC:0.10915FDR:0.95003) or m1_Ctsh(lgFC:-0.31487FDR:0.91744) or m1_Ctsk(lgFC:-0.42819FDR:0.88209) or m1_Ctsl(lgFC:0.35738FDR:0.48755) or m1_Ctso(lgFC:0.061768FDR:1) or m1_Ctsz(lgFC:-0.30768FDR:0.68345) or m1_Tpp1(lgFC:-0.030875FDR:1)'
'm1_HMR_5264'	'm1_apoB100[m1_c] + 2280 m1_ATP[m1_c] + 2280 m1_H2O[m1_c] => 2280 m1_ADP[m1_c] + 275 m1_alanine[m1_c] + 150 m1_arginine[m1_c] + 247 m1_asparagine[m1_c] + 233 m1_aspartate[m1_c] + 25 m1_cysteine[m1_c] + 298 m1_glutamate[m1_c] + 230 m1_glutamine[m1_c] + 207 m1_glycine[m1_c] + 115 m1_histidine[m1_c] + 285 m1_isoleucine[m1_c] + 533 m1_leucine[m1_c] + 357 m1_lysine[m1_c] + 79 m1_methionine[m1_c] + 224…	0	0	0	NaN	NaN	'm1_Protein degradation'	''
'm1_HMR_5265'	'm1_apoB100[m1_l] + 2280 m1_ATP[m1_l] + 2280 m1_H2O[m1_l] => 2280 m1_ADP[m1_l] + 275 m1_alanine[m1_l] + 150 m1_arginine[m1_l] + 247 m1_asparagine[m1_l] + 233 m1_aspartate[m1_l] + 25 m1_cysteine[m1_l] + 298 m1_glutamate[m1_l] + 230 m1_glutamine[m1_l] + 207 m1_glycine[m1_l] + 115 m1_histidine[m1_l] + 285 m1_isoleucine[m1_l] + 533 m1_leucine[m1_l] + 357 m1_lysine[m1_l] + 79 m1_methionine[m1_l] + 224…	0	0	0	NaN	NaN	'm1_Protein degradation'	'm1_Ctsa(lgFC:-0.045497FDR:0.99096) or m1_Ctsb(lgFC:-0.53977FDR:0.06298) or m1_Ctsc(lgFC:-0.35594FDR:0.74715) or m1_Ctsd(lgFC:-0.13352FDR:0.86921) or m1_Ctsf(lgFC:0.10915FDR:0.95003) or m1_Ctsh(lgFC:-0.31487FDR:0.91744) or m1_Ctsk(lgFC:-0.42819FDR:0.88209) or m1_Ctsl(lgFC:0.35738FDR:0.48755) or m1_Ctso(lgFC:0.061768FDR:1) or m1_Ctsz(lgFC:-0.30768FDR:0.68345) or m1_Tpp1(lgFC:-0.030875FDR:1)'
'm1_HMR_5266'	'm1_apo-[ACP][m1_c] + 62 m1_ATP[m1_c] + 62 m1_H2O[m1_c] => 62 m1_ADP[m1_c] + 11 m1_alanine[m1_c] + 9 m1_arginine[m1_c] + m1_asparagine[m1_c] + 8 m1_aspartate[m1_c] + 2 m1_cysteine[m1_c] + 5 m1_glutamate[m1_c] + 7 m1_glutamine[m1_c] + 6 m1_glycine[m1_c] + m1_histidine[m1_c] + 4 m1_isoleucine[m1_c] + 20 m1_leucine[m1_c] + 4 m1_lysine[m1_c] + 5 m1_methionine[m1_c] + 3 m1_phenylalanine[m1_c] + 62 m1_…	0	0	0	NaN	NaN	'm1_Protein degradation'	''
'm1_HMR_5267'	'43 m1_ATP[m1_c] + 43 m1_H2O[m1_c] + m1_mitoApo-[ACP][m1_c] => 43 m1_ADP[m1_c] + 3 m1_alanine[m1_c] + m1_arginine[m1_c] + m1_asparagine[m1_c] + 13 m1_aspartate[m1_c] + m1_cysteine[m1_c] + 9 m1_glutamate[m1_c] + 3 m1_glutamine[m1_c] + 3 m1_glycine[m1_c] + m1_histidine[m1_c] + 8 m1_isoleucine[m1_c] + 10 m1_leucine[m1_c] + 7 m1_lysine[m1_c] + 5 m1_methionine[m1_c] + 3 m1_phenylalanine[m1_c] + 43 m1_…	0	0	0	NaN	NaN	'm1_Protein degradation'	''
'm1_HMR_5268'	'm1_apoC1[m1_c] + 41 m1_ATP[m1_c] + 41 m1_H2O[m1_c] => 41 m1_ADP[m1_c] + 5 m1_alanine[m1_c] + 4 m1_arginine[m1_c] + m1_asparagine[m1_c] + 4 m1_aspartate[m1_c] + 8 m1_glutamate[m1_c] + 3 m1_glutamine[m1_c] + 3 m1_glycine[m1_c] + 4 m1_isoleucine[m1_c] + 12 m1_leucine[m1_c] + 9 m1_lysine[m1_c] + 2 m1_methionine[m1_c] + 4 m1_phenylalanine[m1_c] + 41 m1_Pi[m1_c] + 4 m1_proline[m1_c] + 9 m1_serine[m1_c…	0	0	0	NaN	NaN	'm1_Protein degradation'	''
'm1_HMR_5269'	'm1_apoC2[m1_c] + 50 m1_ATP[m1_c] + 50 m1_H2O[m1_c] => 50 m1_ADP[m1_c] + 7 m1_alanine[m1_c] + 2 m1_arginine[m1_c] + m1_asparagine[m1_c] + 4 m1_aspartate[m1_c] + 8 m1_glutamate[m1_c] + 8 m1_glutamine[m1_c] + 5 m1_glycine[m1_c] + m1_isoleucine[m1_c] + 15 m1_leucine[m1_c] + 6 m1_lysine[m1_c] + 3 m1_methionine[m1_c] + 4 m1_phenylalanine[m1_c] + 50 m1_Pi[m1_c] + 5 m1_proline[m1_c] + 9 m1_serine[m1_c] …	0	0	0	NaN	NaN	'm1_Protein degradation'	''
'm1_HMR_5270'	'm1_apoC3[m1_c] + 49 m1_ATP[m1_c] + 49 m1_H2O[m1_c] => 49 m1_ADP[m1_c] + 15 m1_alanine[m1_c] + 4 m1_arginine[m1_c] + 7 m1_aspartate[m1_c] + 5 m1_glutamate[m1_c] + 6 m1_glutamine[m1_c] + 3 m1_glycine[m1_c] + m1_histidine[m1_c] + 11 m1_leucine[m1_c] + 6 m1_lysine[m1_c] + 3 m1_methionine[m1_c] + 4 m1_phenylalanine[m1_c] + 49 m1_Pi[m1_c] + 3 m1_proline[m1_c] + 12 m1_serine[m1_c] + 5 m1_threonine[m1_c…	0	0	0	NaN	NaN	'm1_Protein degradation'	''
'm1_HMR_5271'	'1337 m1_ATP[m1_c] + m1_fibrinogen[m1_c] + 1337 m1_H2O[m1_c] => 1337 m1_ADP[m1_c] + 134 m1_alanine[m1_c] + 134 m1_arginine[m1_c] + 138 m1_asparagine[m1_c] + 176 m1_aspartate[m1_c] + 48 m1_cysteine[m1_c] + 186 m1_glutamate[m1_c] + 110 m1_glutamine[m1_c] + 262 m1_glycine[m1_c] + 62 m1_histidine[m1_c] + 104 m1_isoleucine[m1_c] + 166 m1_leucine[m1_c] + 154 m1_lysine[m1_c] + 48 m1_methionine[m1_c] + 9…	0	0	0	NaN	NaN	'm1_Protein degradation'	''
'm1_HMR_5272'	'1337 m1_ATP[m1_l] + m1_fibrinogen[m1_l] + 1337 m1_H2O[m1_l] => 1337 m1_ADP[m1_l] + 134 m1_alanine[m1_l] + 134 m1_arginine[m1_l] + 138 m1_asparagine[m1_l] + 176 m1_aspartate[m1_l] + 48 m1_cysteine[m1_l] + 186 m1_glutamate[m1_l] + 110 m1_glutamine[m1_l] + 262 m1_glycine[m1_l] + 62 m1_histidine[m1_l] + 104 m1_isoleucine[m1_l] + 166 m1_leucine[m1_l] + 154 m1_lysine[m1_l] + 48 m1_methionine[m1_l] + 9…	0	0	0	NaN	NaN	'm1_Protein degradation'	'm1_Ctsa(lgFC:-0.045497FDR:0.99096) or m1_Ctsb(lgFC:-0.53977FDR:0.06298) or m1_Ctsc(lgFC:-0.35594FDR:0.74715) or m1_Ctsd(lgFC:-0.13352FDR:0.86921) or m1_Ctsf(lgFC:0.10915FDR:0.95003) or m1_Ctsh(lgFC:-0.31487FDR:0.91744) or m1_Ctsk(lgFC:-0.42819FDR:0.88209) or m1_Ctsl(lgFC:0.35738FDR:0.48755) or m1_Ctso(lgFC:0.061768FDR:1) or m1_Ctsz(lgFC:-0.30768FDR:0.68345) or m1_Tpp1(lgFC:-0.030875FDR:1)'
'm1_HMR_5273'	'203 m1_ATP[m1_c] + 203 m1_H2O[m1_c] + m1_haptoglobin[m1_c] => 203 m1_ADP[m1_c] + 30 m1_alanine[m1_c] + 9 m1_arginine[m1_c] + 21 m1_asparagine[m1_c] + 25 m1_aspartate[m1_c] + 12 m1_cysteine[m1_c] + 25 m1_glutamate[m1_c] + 17 m1_glutamine[m1_c] + 31 m1_glycine[m1_c] + 13 m1_histidine[m1_c] + 18 m1_isoleucine[m1_c] + 31 m1_leucine[m1_c] + 35 m1_lysine[m1_c] + 5 m1_methionine[m1_c] + 8 m1_phenylalan…	0	0	0	NaN	NaN	'm1_Protein degradation'	''
'm1_HMR_5274'	'203 m1_ATP[m1_l] + 203 m1_H2O[m1_l] + m1_haptoglobin[m1_l] => 203 m1_ADP[m1_l] + 30 m1_alanine[m1_l] + 9 m1_arginine[m1_l] + 21 m1_asparagine[m1_l] + 25 m1_aspartate[m1_l] + 12 m1_cysteine[m1_l] + 25 m1_glutamate[m1_l] + 17 m1_glutamine[m1_l] + 31 m1_glycine[m1_l] + 13 m1_histidine[m1_l] + 18 m1_isoleucine[m1_l] + 31 m1_leucine[m1_l] + 35 m1_lysine[m1_l] + 5 m1_methionine[m1_l] + 8 m1_phenylalan…	0	0	0	NaN	NaN	'm1_Protein degradation'	'm1_Ctsa(lgFC:-0.045497FDR:0.99096) or m1_Ctsb(lgFC:-0.53977FDR:0.06298) or m1_Ctsc(lgFC:-0.35594FDR:0.74715) or m1_Ctsd(lgFC:-0.13352FDR:0.86921) or m1_Ctsf(lgFC:0.10915FDR:0.95003) or m1_Ctsh(lgFC:-0.31487FDR:0.91744) or m1_Ctsk(lgFC:-0.42819FDR:0.88209) or m1_Ctsl(lgFC:0.35738FDR:0.48755) or m1_Ctso(lgFC:0.061768FDR:1) or m1_Ctsz(lgFC:-0.30768FDR:0.68345) or m1_Tpp1(lgFC:-0.030875FDR:1)'
'm1_HMR_5275'	'405 m1_ATP[m1_c] + 405 m1_H2O[m1_c] + m1_plasminogen[m1_c] => 405 m1_ADP[m1_c] + 37 m1_alanine[m1_c] + 42 m1_arginine[m1_c] + 40 m1_asparagine[m1_c] + 36 m1_aspartate[m1_c] + 48 m1_cysteine[m1_c] + 56 m1_glutamate[m1_c] + 31 m1_glutamine[m1_c] + 62 m1_glycine[m1_c] + 24 m1_histidine[m1_c] + 22 m1_isoleucine[m1_c] + 48 m1_leucine[m1_c] + 49 m1_lysine[m1_c] + 11 m1_methionine[m1_c] + 21 m1_phenyla…	0	0	0	NaN	NaN	'm1_Protein degradation'	''
'm1_HMR_5276'	'405 m1_ATP[m1_l] + 405 m1_H2O[m1_l] + m1_plasminogen[m1_l] => 405 m1_ADP[m1_l] + 37 m1_alanine[m1_l] + 42 m1_arginine[m1_l] + 40 m1_asparagine[m1_l] + 36 m1_aspartate[m1_l] + 48 m1_cysteine[m1_l] + 56 m1_glutamate[m1_l] + 31 m1_glutamine[m1_l] + 62 m1_glycine[m1_l] + 24 m1_histidine[m1_l] + 22 m1_isoleucine[m1_l] + 48 m1_leucine[m1_l] + 49 m1_lysine[m1_l] + 11 m1_methionine[m1_l] + 21 m1_phenyla…	0	0	0	NaN	NaN	'm1_Protein degradation'	'm1_Ctsa(lgFC:-0.045497FDR:0.99096) or m1_Ctsb(lgFC:-0.53977FDR:0.06298) or m1_Ctsc(lgFC:-0.35594FDR:0.74715) or m1_Ctsd(lgFC:-0.13352FDR:0.86921) or m1_Ctsf(lgFC:0.10915FDR:0.95003) or m1_Ctsh(lgFC:-0.31487FDR:0.91744) or m1_Ctsk(lgFC:-0.42819FDR:0.88209) or m1_Ctsl(lgFC:0.35738FDR:0.48755) or m1_Ctso(lgFC:0.061768FDR:1) or m1_Ctsz(lgFC:-0.30768FDR:0.68345) or m1_Tpp1(lgFC:-0.030875FDR:1)'
'm1_HMR_5277'	'311 m1_ATP[m1_c] + 311 m1_H2O[m1_c] + m1_prothrombin[m1_c] => 311 m1_ADP[m1_c] + 42 m1_alanine[m1_c] + 44 m1_arginine[m1_c] + 25 m1_asparagine[m1_c] + 35 m1_aspartate[m1_c] + 26 m1_cysteine[m1_c] + 51 m1_glutamate[m1_c] + 26 m1_glutamine[m1_c] + 49 m1_glycine[m1_c] + 13 m1_histidine[m1_c] + 22 m1_isoleucine[m1_c] + 51 m1_leucine[m1_c] + 29 m1_lysine[m1_c] + 9 m1_methionine[m1_c] + 21 m1_phenylal…	0	0	0	NaN	NaN	'm1_Protein degradation'	''
'm1_HMR_5278'	'311 m1_ATP[m1_l] + 311 m1_H2O[m1_l] + m1_prothrombin[m1_l] => 311 m1_ADP[m1_l] + 42 m1_alanine[m1_l] + 44 m1_arginine[m1_l] + 25 m1_asparagine[m1_l] + 35 m1_aspartate[m1_l] + 26 m1_cysteine[m1_l] + 51 m1_glutamate[m1_l] + 26 m1_glutamine[m1_l] + 49 m1_glycine[m1_l] + 13 m1_histidine[m1_l] + 22 m1_isoleucine[m1_l] + 51 m1_leucine[m1_l] + 29 m1_lysine[m1_l] + 9 m1_methionine[m1_l] + 21 m1_phenylal…	0	0	0	NaN	NaN	'm1_Protein degradation'	'm1_Ctsa(lgFC:-0.045497FDR:0.99096) or m1_Ctsb(lgFC:-0.53977FDR:0.06298) or m1_Ctsc(lgFC:-0.35594FDR:0.74715) or m1_Ctsd(lgFC:-0.13352FDR:0.86921) or m1_Ctsf(lgFC:0.10915FDR:0.95003) or m1_Ctsh(lgFC:-0.31487FDR:0.91744) or m1_Ctsk(lgFC:-0.42819FDR:0.88209) or m1_Ctsl(lgFC:0.35738FDR:0.48755) or m1_Ctso(lgFC:0.061768FDR:1) or m1_Ctsz(lgFC:-0.30768FDR:0.68345) or m1_Tpp1(lgFC:-0.030875FDR:1)'
'm1_HMR_5279'	'm1_[apotransferin][m1_c] + 349 m1_ATP[m1_c] + 349 m1_H2O[m1_c] => 349 m1_ADP[m1_c] + 61 m1_alanine[m1_c] + 27 m1_arginine[m1_c] + 34 m1_asparagine[m1_c] + 45 m1_aspartate[m1_c] + 40 m1_cysteine[m1_c] + 42 m1_glutamate[m1_c] + 17 m1_glutamine[m1_c] + 52 m1_glycine[m1_c] + 19 m1_histidine[m1_c] + 15 m1_isoleucine[m1_c] + 65 m1_leucine[m1_c] + 58 m1_lysine[m1_c] + 10 m1_methionine[m1_c] + 28 m1_phe…	0	0	0	NaN	NaN	'm1_Protein degradation'	''
'm1_HMR_5280'	'm1_[apotransferin][m1_l] + 349 m1_ATP[m1_l] + 349 m1_H2O[m1_l] => 349 m1_ADP[m1_l] + 61 m1_alanine[m1_l] + 27 m1_arginine[m1_l] + 34 m1_asparagine[m1_l] + 45 m1_aspartate[m1_l] + 40 m1_cysteine[m1_l] + 42 m1_glutamate[m1_l] + 17 m1_glutamine[m1_l] + 52 m1_glycine[m1_l] + 19 m1_histidine[m1_l] + 15 m1_isoleucine[m1_l] + 65 m1_leucine[m1_l] + 58 m1_lysine[m1_l] + 10 m1_methionine[m1_l] + 28 m1_phe…	0	0	0	NaN	NaN	'm1_Protein degradation'	'm1_Ctsa(lgFC:-0.045497FDR:0.99096) or m1_Ctsb(lgFC:-0.53977FDR:0.06298) or m1_Ctsc(lgFC:-0.35594FDR:0.74715) or m1_Ctsd(lgFC:-0.13352FDR:0.86921) or m1_Ctsf(lgFC:0.10915FDR:0.95003) or m1_Ctsh(lgFC:-0.31487FDR:0.91744) or m1_Ctsk(lgFC:-0.42819FDR:0.88209) or m1_Ctsl(lgFC:0.35738FDR:0.48755) or m1_Ctso(lgFC:0.061768FDR:1) or m1_Ctsz(lgFC:-0.30768FDR:0.68345) or m1_Tpp1(lgFC:-0.030875FDR:1)'
'm1_HMR_5281'	'm1_apoE[m1_c] + 158 m1_ATP[m1_c] + 158 m1_H2O[m1_c] => 158 m1_ADP[m1_c] + 39 m1_alanine[m1_c] + 34 m1_arginine[m1_c] + m1_asparagine[m1_c] + 11 m1_aspartate[m1_c] + 2 m1_cysteine[m1_c] + 40 m1_glutamate[m1_c] + 32 m1_glutamine[m1_c] + 18 m1_glycine[m1_c] + 2 m1_histidine[m1_c] + 2 m1_isoleucine[m1_c] + 41 m1_leucine[m1_c] + 13 m1_lysine[m1_c] + 8 m1_methionine[m1_c] + 4 m1_phenylalanine[m1_c] + …	0	0	0	NaN	NaN	'm1_Protein degradation'	''
'm1_HMR_5282'	'm1_apoE[m1_l] + 158 m1_ATP[m1_l] + 158 m1_H2O[m1_l] => 158 m1_ADP[m1_l] + 39 m1_alanine[m1_l] + 34 m1_arginine[m1_l] + m1_asparagine[m1_l] + 11 m1_aspartate[m1_l] + 2 m1_cysteine[m1_l] + 40 m1_glutamate[m1_l] + 32 m1_glutamine[m1_l] + 18 m1_glycine[m1_l] + 2 m1_histidine[m1_l] + 2 m1_isoleucine[m1_l] + 41 m1_leucine[m1_l] + 13 m1_lysine[m1_l] + 8 m1_methionine[m1_l] + 4 m1_phenylalanine[m1_l] + …	4.92857e-07	0	4.92857e-07	0.971011	4.78569e-07	'm1_Protein degradation'	'm1_Ctsa(lgFC:-0.045497FDR:0.99096) or m1_Ctsb(lgFC:-0.53977FDR:0.06298) or m1_Ctsc(lgFC:-0.35594FDR:0.74715) or m1_Ctsd(lgFC:-0.13352FDR:0.86921) or m1_Ctsf(lgFC:0.10915FDR:0.95003) or m1_Ctsh(lgFC:-0.31487FDR:0.91744) or m1_Ctsk(lgFC:-0.42819FDR:0.88209) or m1_Ctsl(lgFC:0.35738FDR:0.48755) or m1_Ctso(lgFC:0.061768FDR:1) or m1_Ctsz(lgFC:-0.30768FDR:0.68345) or m1_Tpp1(lgFC:-0.030875FDR:1)'
'm1_HMR_5283'	'm1_apoA1[m1_c] + 133 m1_ATP[m1_c] + 133 m1_H2O[m1_c] => 133 m1_ADP[m1_c] + 23 m1_alanine[m1_c] + 17 m1_arginine[m1_c] + 5 m1_asparagine[m1_c] + 16 m1_aspartate[m1_c] + 30 m1_glutamate[m1_c] + 19 m1_glutamine[m1_c] + 11 m1_glycine[m1_c] + 6 m1_histidine[m1_c] + 41 m1_leucine[m1_c] + 22 m1_lysine[m1_c] + 4 m1_methionine[m1_c] + 8 m1_phenylalanine[m1_c] + 133 m1_Pi[m1_c] + 10 m1_proline[m1_c] + 16 …	0	0	0	NaN	NaN	'm1_Protein degradation'	''
'm1_HMR_5284'	'm1_apoA1[m1_l] + 133 m1_ATP[m1_l] + 133 m1_H2O[m1_l] => 133 m1_ADP[m1_l] + 23 m1_alanine[m1_l] + 17 m1_arginine[m1_l] + 5 m1_asparagine[m1_l] + 16 m1_aspartate[m1_l] + 30 m1_glutamate[m1_l] + 19 m1_glutamine[m1_l] + 11 m1_glycine[m1_l] + 6 m1_histidine[m1_l] + 41 m1_leucine[m1_l] + 22 m1_lysine[m1_l] + 4 m1_methionine[m1_l] + 8 m1_phenylalanine[m1_l] + 133 m1_Pi[m1_l] + 10 m1_proline[m1_l] + 16 …	0.00020971	0	0.00020971	0.971011	0.000203631	'm1_Protein degradation'	'm1_Ctsa(lgFC:-0.045497FDR:0.99096) or m1_Ctsb(lgFC:-0.53977FDR:0.06298) or m1_Ctsc(lgFC:-0.35594FDR:0.74715) or m1_Ctsd(lgFC:-0.13352FDR:0.86921) or m1_Ctsf(lgFC:0.10915FDR:0.95003) or m1_Ctsh(lgFC:-0.31487FDR:0.91744) or m1_Ctsk(lgFC:-0.42819FDR:0.88209) or m1_Ctsl(lgFC:0.35738FDR:0.48755) or m1_Ctso(lgFC:0.061768FDR:1) or m1_Ctsz(lgFC:-0.30768FDR:0.68345) or m1_Tpp1(lgFC:-0.030875FDR:1)'
'm1_HMR_5285'	'142 m1_ATP[m1_l] + 142 m1_H2O[m1_l] + m1_STAR[m1_l] => 142 m1_ADP[m1_l] + 21 m1_alanine[m1_l] + 20 m1_arginine[m1_l] + 11 m1_asparagine[m1_l] + 10 m1_aspartate[m1_l] + 5 m1_cysteine[m1_l] + 22 m1_glutamate[m1_l] + 17 m1_glutamine[m1_l] + 21 m1_glycine[m1_l] + 6 m1_histidine[m1_l] + 10 m1_isoleucine[m1_l] + 31 m1_leucine[m1_l] + 19 m1_lysine[m1_l] + 12 m1_methionine[m1_l] + 6 m1_phenylalanine[m1_…	0	0	0	NaN	NaN	'm1_Protein degradation'	'm1_Ctsa(lgFC:-0.045497FDR:0.99096) or m1_Ctsb(lgFC:-0.53977FDR:0.06298) or m1_Ctsc(lgFC:-0.35594FDR:0.74715) or m1_Ctsd(lgFC:-0.13352FDR:0.86921) or m1_Ctsf(lgFC:0.10915FDR:0.95003) or m1_Ctsh(lgFC:-0.31487FDR:0.91744) or m1_Ctsk(lgFC:-0.42819FDR:0.88209) or m1_Ctsl(lgFC:0.35738FDR:0.48755) or m1_Ctso(lgFC:0.061768FDR:1) or m1_Ctsz(lgFC:-0.30768FDR:0.68345) or m1_Tpp1(lgFC:-0.030875FDR:1)'
'm1_HMR_5286'	'96 m1_ATP[m1_l] + m1_GM2A[m1_l] + 96 m1_H2O[m1_l] => 96 m1_ADP[m1_l] + 10 m1_alanine[m1_l] + 4 m1_arginine[m1_l] + 3 m1_asparagine[m1_l] + 9 m1_aspartate[m1_l] + 8 m1_cysteine[m1_l] + 11 m1_glutamate[m1_l] + 4 m1_glutamine[m1_l] + 13 m1_glycine[m1_l] + 3 m1_histidine[m1_l] + 12 m1_isoleucine[m1_l] + 28 m1_leucine[m1_l] + 11 m1_lysine[m1_l] + 4 m1_methionine[m1_l] + 5 m1_phenylalanine[m1_l] + 96 …	0	0	0	NaN	NaN	'm1_Protein degradation'	'm1_Ctsa(lgFC:-0.045497FDR:0.99096) or m1_Ctsb(lgFC:-0.53977FDR:0.06298) or m1_Ctsc(lgFC:-0.35594FDR:0.74715) or m1_Ctsd(lgFC:-0.13352FDR:0.86921) or m1_Ctsf(lgFC:0.10915FDR:0.95003) or m1_Ctsh(lgFC:-0.31487FDR:0.91744) or m1_Ctsk(lgFC:-0.42819FDR:0.88209) or m1_Ctsl(lgFC:0.35738FDR:0.48755) or m1_Ctso(lgFC:0.061768FDR:1) or m1_Ctsz(lgFC:-0.30768FDR:0.68345) or m1_Tpp1(lgFC:-0.030875FDR:1)'
'm1_HMR_5287'	'm1_apocytochrome-C[m1_l] + 162 m1_ATP[m1_l] + 162 m1_H2O[m1_l] => 162 m1_ADP[m1_l] + 38 m1_alanine[m1_l] + 23 m1_arginine[m1_l] + 5 m1_asparagine[m1_l] + 14 m1_aspartate[m1_l] + 6 m1_cysteine[m1_l] + 15 m1_glutamate[m1_l] + 7 m1_glutamine[m1_l] + 28 m1_glycine[m1_l] + 10 m1_histidine[m1_l] + 6 m1_isoleucine[m1_l] + 37 m1_leucine[m1_l] + 14 m1_lysine[m1_l] + 14 m1_methionine[m1_l] + 10 m1_phenyla…	0	0	0	NaN	NaN	'm1_Protein degradation'	'm1_Ctsa(lgFC:-0.045497FDR:0.99096) or m1_Ctsb(lgFC:-0.53977FDR:0.06298) or m1_Ctsc(lgFC:-0.35594FDR:0.74715) or m1_Ctsd(lgFC:-0.13352FDR:0.86921) or m1_Ctsf(lgFC:0.10915FDR:0.95003) or m1_Ctsh(lgFC:-0.31487FDR:0.91744) or m1_Ctsk(lgFC:-0.42819FDR:0.88209) or m1_Ctsl(lgFC:0.35738FDR:0.48755) or m1_Ctso(lgFC:0.061768FDR:1) or m1_Ctsz(lgFC:-0.30768FDR:0.68345) or m1_Tpp1(lgFC:-0.030875FDR:1)'
'm1_HMR_5288'	'175 m1_ATP[m1_c] + m1_glycogenin[m1_c] + 175 m1_H2O[m1_c] => 175 m1_ADP[m1_c] + 22 m1_alanine[m1_c] + 12 m1_arginine[m1_c] + 12 m1_asparagine[m1_c] + 26 m1_aspartate[m1_c] + 6 m1_cysteine[m1_c] + 15 m1_glutamate[m1_c] + 14 m1_glutamine[m1_c] + 18 m1_glycine[m1_c] + 9 m1_histidine[m1_c] + 12 m1_isoleucine[m1_c] + 39 m1_leucine[m1_c] + 18 m1_lysine[m1_c] + 8 m1_methionine[m1_c] + 20 m1_phenylalani…	0	0	0	NaN	NaN	'm1_Protein degradation'	''
'm1_HMR_5289'	'234 m1_ATP[m1_l] + 234 m1_H2O[m1_l] + m1_PPARA[m1_l] => 234 m1_ADP[m1_l] + 31 m1_alanine[m1_l] + 19 m1_arginine[m1_l] + 19 m1_asparagine[m1_l] + 27 m1_aspartate[m1_l] + 19 m1_cysteine[m1_l] + 34 m1_glutamate[m1_l] + 16 m1_glutamine[m1_l] + 28 m1_glycine[m1_l] + 13 m1_histidine[m1_l] + 29 m1_isoleucine[m1_l] + 47 m1_leucine[m1_l] + 33 m1_lysine[m1_l] + 15 m1_methionine[m1_l] + 22 m1_phenylalanine…	0	0	0	NaN	NaN	'm1_Protein degradation'	'm1_Ctsa(lgFC:-0.045497FDR:0.99096) or m1_Ctsb(lgFC:-0.53977FDR:0.06298) or m1_Ctsc(lgFC:-0.35594FDR:0.74715) or m1_Ctsd(lgFC:-0.13352FDR:0.86921) or m1_Ctsf(lgFC:0.10915FDR:0.95003) or m1_Ctsh(lgFC:-0.31487FDR:0.91744) or m1_Ctsk(lgFC:-0.42819FDR:0.88209) or m1_Ctsl(lgFC:0.35738FDR:0.48755) or m1_Ctso(lgFC:0.061768FDR:1) or m1_Ctsz(lgFC:-0.30768FDR:0.68345) or m1_Tpp1(lgFC:-0.030875FDR:1)'
'm1_HMR_5290'	'm1_apoB48[m1_l] + 2281 m1_ATP[m1_l] + 2281 m1_H2O[m1_l] => 2281 m1_ADP[m1_l] + 276 m1_alanine[m1_l] + 150 m1_arginine[m1_l] + 245 m1_asparagine[m1_l] + 234 m1_aspartate[m1_l] + 24 m1_cysteine[m1_l] + 297 m1_glutamate[m1_l] + 231 m1_glutamine[m1_l] + 207 m1_glycine[m1_l] + 114 m1_histidine[m1_l] + 287 m1_isoleucine[m1_l] + 536 m1_leucine[m1_l] + 356 m1_lysine[m1_l] + 79 m1_methionine[m1_l] + 224 …	4.92857e-07	0	4.92857e-07	0.971011	4.78569e-07	'm1_Protein degradation'	'm1_Ctsa(lgFC:-0.045497FDR:0.99096) or m1_Ctsb(lgFC:-0.53977FDR:0.06298) or m1_Ctsc(lgFC:-0.35594FDR:0.74715) or m1_Ctsd(lgFC:-0.13352FDR:0.86921) or m1_Ctsf(lgFC:0.10915FDR:0.95003) or m1_Ctsh(lgFC:-0.31487FDR:0.91744) or m1_Ctsk(lgFC:-0.42819FDR:0.88209) or m1_Ctsl(lgFC:0.35738FDR:0.48755) or m1_Ctso(lgFC:0.061768FDR:1) or m1_Ctsz(lgFC:-0.30768FDR:0.68345) or m1_Tpp1(lgFC:-0.030875FDR:1)'
'm1_HMR_9817'	'52 m1_ATP[m1_c] + 52 m1_H2O[m1_c] + m1_thioredoxin[m1_c] => 52 m1_ADP[m1_c] + 8 m1_alanine[m1_c] + 3 m1_asparagine[m1_c] + 7 m1_aspartate[m1_c] + 5 m1_cysteine[m1_c] + 10 m1_glutamate[m1_c] + 5 m1_glutamine[m1_c] + 5 m1_glycine[m1_c] + m1_histidine[m1_c] + 4 m1_isoleucine[m1_c] + 6 m1_leucine[m1_c] + 12 m1_lysine[m1_c] + 3 m1_methionine[m1_c] + 9 m1_phenylalanine[m1_c] + 52 m1_Pi[m1_c] + 3 m1_pr…	0	0	0	NaN	NaN	'm1_Protein degradation'	''
'm1_HMR_9818'	'83 m1_ATP[m1_c] + 83 m1_H2O[m1_c] + m1_mitothioredoxin[m1_c] => 83 m1_ADP[m1_c] + 11 m1_alanine[m1_c] + 9 m1_arginine[m1_c] + 4 m1_asparagine[m1_c] + 12 m1_aspartate[m1_c] + 3 m1_cysteine[m1_c] + 6 m1_glutamate[m1_c] + 10 m1_glutamine[m1_c] + 10 m1_glycine[m1_c] + 3 m1_histidine[m1_c] + 9 m1_isoleucine[m1_c] + 15 m1_leucine[m1_c] + 11 m1_lysine[m1_c] + 4 m1_methionine[m1_c] + 6 m1_phenylalanine[…	0	0	0	NaN	NaN	'm1_Protein degradation'	''
'm1_HMR_5407'	'm1_carbonate[m1_s] => m1_CO2[m1_s] + m1_H2O[m1_s]'	0	0	0	NaN	NaN	'm1_Nitrogen metabolism'	'm1_Car1(lgFC:-0.35713FDR:0.94727) or m1_Car13(lgFC:0.00415FDR:1) or m1_Car14(lgFC:0.29297FDR:0.87414) or m1_Car2(lgFC:-0.16333FDR:0.99096) or m1_Car3(lgFC:-1.3574FDR:0.39371) or m1_Car4(lgFC:-1.446FDR:0.77677) or m1_Car5a(lgFC:-0.41282FDR:0.51121) or m1_Car5b(lgFC:0.019504FDR:1) or m1_Car7(lgFC:0.2183FDR:0.99096) or m1_Car8(lgFC:-0.28636FDR:0.71385)'
'm1_HMR_3851'	'm1_3-sulfinylpyruvic acid[m1_c] + m1_H2O[m1_c] => m1_pyruvate[m1_c] + m1_sulfite[m1_c]'	0	0	0	NaN	NaN	'm1_Sulfur metabolism'	''
'm1_HMR_3861'	'm1_3-sulfinoalanine[m1_c] + m1_AKG[m1_c] => m1_3-sulfinylpyruvic acid[m1_c] + m1_glutamate[m1_c]'	0	0	0	NaN	NaN	'm1_Sulfur metabolism'	'm1_Got1(lgFC:0.17494FDR:0.98301)'
'm1_HMR_3866'	'm1_3-sulfinylpyruvic acid[m1_m] + m1_H2O[m1_m] => m1_pyruvate[m1_m] + m1_sulfite[m1_m]'	0.180275	0.180275	0.36055	NaN	NaN	'm1_Sulfur metabolism'	''
'm1_HMR_3915'	'm1_SAM[m1_c] + m1_THF[m1_c] => m1_5-methyl-THF[m1_c] + m1_SAH[m1_c]'	0.00179005	0	0.00179005	1	0.00179005	'm1_Sulfur metabolism'	'm1_Hnmt(lgFC:0.030198FDR:1)'
'm1_HMR_4084'	'm1_H2O[m1_c] + m1_PAP[m1_c] => m1_AMP[m1_c] + m1_Pi[m1_c]'	0	0	0	NaN	NaN	'm1_Sulfur metabolism'	'm1_Bpnt1(lgFC:0.043362FDR:1) or m1_Impad1(lgFC:0.27986FDR:0.2471)'
'm1_HMR_4187'	'm1_H2O[m1_c] + m1_PAPS[m1_c] => m1_adenylyl sulfate[m1_c] + m1_Pi[m1_c]'	0	0	0	NaN	NaN	'm1_Sulfur metabolism'	'm1_Bpnt1(lgFC:0.043362FDR:1) or m1_Impad1(lgFC:0.27986FDR:0.2471)'
'm1_HMR_4701'	'm1_dimethylglycine[m1_c] + m1_SAH[m1_c] => m1_SAM[m1_c] + m1_sarcosine[m1_c]'	0	0	0	NaN	NaN	'm1_Sulfur metabolism'	'm1_Dmgdh(lgFC:0.58722FDR:0.74449) or m1_Sardh(lgFC:-0.13165FDR:0.97308)'
'm1_HMR_4840'	'm1_H2O[m1_c] + m1_H2S2O3[m1_c] => m1_H2S[m1_c] + m1_sulfate[m1_c]'	0.180275	0.180288	0.360563	NaN	NaN	'm1_Sulfur metabolism'	''
'm1_HMR_8662'	'm1_CoA[m1_m] + m1_GTP[m1_m] + m1_itaconate[m1_m] <=> m1_GDP[m1_m] + m1_itaconyl-CoA[m1_m] + m1_Pi[m1_m]'	0	0	0	NaN	NaN	'm1_C5-branched dibasic acid metabolism'	'm1_Sucla2(lgFC:0.089134FDR:0.96686) or m1_Suclg1(lgFC:-0.018246FDR:1) or m1_Suclg2(lgFC:0.11643FDR:0.94457)'
'm1_HMR_8663'	'm1_ADP[m1_m] + m1_itaconyl-CoA[m1_m] + m1_Pi[m1_m] <=> m1_ATP[m1_m] + m1_CoA[m1_m] + m1_itaconate[m1_m]'	0	0	0	NaN	NaN	'm1_C5-branched dibasic acid metabolism'	'm1_Sucla2(lgFC:0.089134FDR:0.96686) or m1_Suclg1(lgFC:-0.018246FDR:1) or m1_Suclg2(lgFC:0.11643FDR:0.94457)'
'm1_HMR_8664'	'm1_(3S)-citramalyl-CoA[m1_m] <=> m1_H2O[m1_m] + m1_itaconyl-CoA[m1_m]'	0	0	0	NaN	NaN	'm1_C5-branched dibasic acid metabolism'	''
'm1_HMR_8665'	'm1_(3S)-citramalyl-CoA[m1_m] <=> m1_H2O[m1_m] + m1_mesaconyl-CoA[m1_m]'	0	0	0	NaN	NaN	'm1_C5-branched dibasic acid metabolism'	''
'm1_HMR_8666'	'm1_(3S)-citramalyl-CoA[m1_m] => m1_acetyl-CoA[m1_m] + m1_pyruvate[m1_m]'	0	0	0	NaN	NaN	'm1_C5-branched dibasic acid metabolism'	''
'm1_HMR_8667'	'm1_ADP[m1_m] + m1_mesaconyl-CoA[m1_m] + m1_Pi[m1_m] <=> m1_ATP[m1_m] + m1_CoA[m1_m] + m1_mesaconate[m1_m]'	0	-16.1621	16.1621	NaN	NaN	'm1_C5-branched dibasic acid metabolism'	'm1_Sucla2(lgFC:0.089134FDR:0.96686) or m1_Suclg1(lgFC:-0.018246FDR:1) or m1_Suclg2(lgFC:0.11643FDR:0.94457)'
'm1_HMR_8668'	'm1_CoA[m1_m] + m1_GTP[m1_m] + m1_mesaconate[m1_m] <=> m1_GDP[m1_m] + m1_mesaconyl-CoA[m1_m] + m1_Pi[m1_m]'	0	-16.1621	16.1621	NaN	NaN	'm1_C5-branched dibasic acid metabolism'	'm1_Sucla2(lgFC:0.089134FDR:0.96686) or m1_Suclg1(lgFC:-0.018246FDR:1) or m1_Suclg2(lgFC:0.11643FDR:0.94457)'
'm1_HMR_8669'	'm1_H2O[m1_m] + m1_mesaconyl-CoA[m1_m] => m1_acetyl-CoA[m1_m] + m1_pyruvate[m1_m]'	0	0	0	NaN	NaN	'm1_C5-branched dibasic acid metabolism'	''
'm1_HMR_3787'	'm1_acetoacetate[m1_m] + m1_succinyl-CoA[m1_m] => m1_acetoacetyl-CoA[m1_m] + m1_succinate[m1_m]'	2.3885	2.12985	4.51834	0.943621	2.36218	'm1_Tricarboxylic acid cycle and glyoxylate/dicarboxylate metabolism'	'm1_Oxct1(lgFC:-0.30963FDR:0.70811)'
'm1_HMR_0710'	'm1_isocitrate[m1_c] + m1_NADP+[m1_c] => m1_AKG[m1_c] + m1_CO2[m1_c] + m1_H+[m1_c] + m1_NADPH[m1_c]'	0.054524	0.0545179	0.109042	0.999887	0.0545179	'm1_Tricarboxylic acid cycle and glyoxylate/dicarboxylate metabolism'	'm1_Idh1(lgFC:-0.094439FDR:0.99644) or m1_Idh2(lgFC:-0.023808FDR:1)'
'm1_HMR_3958'	'm1_isocitrate[m1_m] + m1_NADP+[m1_m] => m1_AKG[m1_m] + m1_CO2[m1_m] + m1_H+[m1_m] + m1_NADPH[m1_m]'	0	0	0	NaN	0.00479495	'm1_Tricarboxylic acid cycle and glyoxylate/dicarboxylate metabolism'	'm1_Idh1(lgFC:-0.094439FDR:0.99644) or m1_Idh2(lgFC:-0.023808FDR:1)'
'm1_HMR_3957'	'm1_isocitrate[m1_m] + m1_NAD+[m1_m] => m1_AKG[m1_m] + m1_CO2[m1_m] + m1_H+[m1_m] + m1_NADH[m1_m]'	20.9916	20.2926	41.2842	NaN	20.4292	'm1_Tricarboxylic acid cycle and glyoxylate/dicarboxylate metabolism'	'm1_Idh3a(lgFC:0.23814FDR:0.79087) or m1_Idh3b(lgFC:-0.37325FDR:0.39713) or m1_Idh3g(lgFC:-0.041866FDR:1)'
'm1_HMR_4111'	'm1_oxalosuccinate[m1_c] => m1_AKG[m1_c] + m1_CO2[m1_c]'	0	0.12761	0.12761	NaN	NaN	'm1_Tricarboxylic acid cycle and glyoxylate/dicarboxylate metabolism'	'm1_Idh1(lgFC:-0.094439FDR:0.99644) or m1_Idh2(lgFC:-0.023808FDR:1)'
'm1_HMR_4112'	'm1_oxalosuccinate[m1_m] => m1_AKG[m1_m] + m1_CO2[m1_m]'	0	0	0	NaN	NaN	'm1_Tricarboxylic acid cycle and glyoxylate/dicarboxylate metabolism'	'm1_Idh1(lgFC:-0.094439FDR:0.99644) or m1_Idh2(lgFC:-0.023808FDR:1)'
'm1_HMR_4113'	'm1_oxalosuccinate[m1_p] => m1_AKG[m1_p] + m1_CO2[m1_p]'	0	0	0	NaN	NaN	'm1_Tricarboxylic acid cycle and glyoxylate/dicarboxylate metabolism'	'm1_Idh1(lgFC:-0.094439FDR:0.99644) or m1_Idh2(lgFC:-0.023808FDR:1)'
'm1_HMR_4139'	'm1_H+[m1_c] + m1_NADH[m1_c] + m1_OAA[m1_c] <=> m1_malate[m1_c] + m1_NAD+[m1_c]'	17.0011	17.0011	34.0022	1	17.0752	'm1_Tricarboxylic acid cycle and glyoxylate/dicarboxylate metabolism'	'm1_Mdh1(lgFC:-0.066553FDR:1)'
'm1_HMR_4141'	'm1_H+[m1_m] + m1_NADH[m1_m] + m1_OAA[m1_m] <=> m1_malate[m1_m] + m1_NAD+[m1_m]'	-38.2276	-39.2321	77.4597	1	-38.4478	'm1_Tricarboxylic acid cycle and glyoxylate/dicarboxylate metabolism'	'm1_Mdh2(lgFC:0.033792FDR:1)'
'm1_HMR_4145'	'm1_acetyl-CoA[m1_m] + m1_H2O[m1_m] + m1_OAA[m1_m] <=> m1_citrate[m1_m] + m1_CoA[m1_m]'	21.0464	20.4747	41.5211	0.972838	20.6169	'm1_Tricarboxylic acid cycle and glyoxylate/dicarboxylate metabolism'	'm1_Cs(lgFC:-0.21651FDR:0.80509)'
'm1_HMR_4147'	'm1_CoA[m1_m] + m1_GTP[m1_m] + m1_succinate[m1_m] <=> m1_GDP[m1_m] + m1_Pi[m1_m] + m1_succinyl-CoA[m1_m]'	-0.206643	-0.472622	0.679264	1.00226	NaN	'm1_Tricarboxylic acid cycle and glyoxylate/dicarboxylate metabolism'	'm1_Sucla2(lgFC:0.089134FDR:0.96686) or m1_Suclg1(lgFC:-0.018246FDR:1) or m1_Suclg2(lgFC:0.11643FDR:0.94457)'
'm1_HMR_4149'	'm1_ATP[m1_c] + m1_citrate[m1_c] + m1_CoA[m1_c] => m1_acetyl-CoA[m1_c] + m1_ADP[m1_c] + m1_OAA[m1_c] + m1_Pi[m1_c]'	0	0	0	NaN	NaN	'm1_Tricarboxylic acid cycle and glyoxylate/dicarboxylate metabolism'	'm1_Acly(lgFC:-0.41284FDR:0.83486)'
'm1_HMR_4152'	'm1_ADP[m1_m] + m1_Pi[m1_m] + m1_succinyl-CoA[m1_m] <=> m1_ATP[m1_m] + m1_CoA[m1_m] + m1_succinate[m1_m]'	19.8617	19.9065	39.7682	1.00226	19.872	'm1_Tricarboxylic acid cycle and glyoxylate/dicarboxylate metabolism'	'm1_Sucla2(lgFC:0.089134FDR:0.96686) or m1_Suclg1(lgFC:-0.018246FDR:1) or m1_Suclg2(lgFC:0.11643FDR:0.94457)'
'm1_HMR_4209'	'm1_AKG[m1_m] + m1_thiamin-PP[m1_m] => m1_3-carboxy-1-hydroxypropyl-ThPP[m1_m] + m1_CO2[m1_m]'	0	0	0	NaN	NaN	'm1_Tricarboxylic acid cycle and glyoxylate/dicarboxylate metabolism'	'm1_Dhtkd1(lgFC:0.30996FDR:0.68671) or m1_Ogdh(lgFC:0.05342FDR:0.9961) or m1_Ogdhl(lgFC:0.70021FDR:0.9051)'
'm1_HMR_4408'	'm1_fumarate[m1_c] + m1_H2O[m1_c] <=> m1_malate[m1_c]'	0	0.052156	0.052156	1	0.0547866	'm1_Tricarboxylic acid cycle and glyoxylate/dicarboxylate metabolism'	'm1_Fh1(lgFC:-0.054318FDR:1)'
'm1_HMR_4410'	'm1_fumarate[m1_m] + m1_H2O[m1_m] <=> m1_malate[m1_m]'	22.6919	22.6919	45.3838	1	22.6256	'm1_Tricarboxylic acid cycle and glyoxylate/dicarboxylate metabolism'	'm1_Fh1(lgFC:-0.054318FDR:1)'
'm1_HMR_4454'	'm1_citrate[m1_c] <=> m1_isocitrate[m1_c]'	0.0547866	0.0494927	0.104279	0.903372	0.0494927	'm1_Tricarboxylic acid cycle and glyoxylate/dicarboxylate metabolism'	'm1_Aco1(lgFC:-0.21438FDR:0.71316) or m1_Ireb2(lgFC:-0.31812FDR:0.22355)'
'm1_HMR_4456'	'm1_citrate[m1_m] <=> m1_isocitrate[m1_m]'	20.9916	20.6019	41.5934	NaN	20.7453	'm1_Tricarboxylic acid cycle and glyoxylate/dicarboxylate metabolism'	'm1_Aco1(lgFC:-0.21438FDR:0.71316) or m1_Aco2(lgFC:0.11886FDR:0.97117)'
'm1_HMR_4458'	'm1_cis-aconitate[m1_m] + m1_H2O[m1_m] <=> m1_citrate[m1_m]'	0	0.176631	0.176631	NaN	NaN	'm1_Tricarboxylic acid cycle and glyoxylate/dicarboxylate metabolism'	'm1_Aco1(lgFC:-0.21438FDR:0.71316) or m1_Aco2(lgFC:0.11886FDR:0.97117)'
'm1_HMR_4465'	'm1_H+[m1_c] + m1_hydroxypyruvate[m1_c] + m1_NADPH[m1_c] => m1_glycerate[m1_c] + m1_NADP+[m1_c]'	0	0	0	NaN	NaN	'm1_Tricarboxylic acid cycle and glyoxylate/dicarboxylate metabolism'	'm1_Grhpr(lgFC:0.020029FDR:1)'
'm1_HMR_4585'	'm1_H+[m1_c] + m1_NADPH[m1_c] + m1_oxalosuccinate[m1_c] <=> m1_isocitrate[m1_c] + m1_NADP+[m1_c]'	0	-0.12761	0.12761	NaN	NaN	'm1_Tricarboxylic acid cycle and glyoxylate/dicarboxylate metabolism'	'm1_Idh1(lgFC:-0.094439FDR:0.99644) or m1_Idh2(lgFC:-0.023808FDR:1)'
'm1_HMR_4586'	'm1_H+[m1_m] + m1_NADPH[m1_m] + m1_oxalosuccinate[m1_m] <=> m1_isocitrate[m1_m] + m1_NADP+[m1_m]'	0	-0.690744	0.690744	NaN	NaN	'm1_Tricarboxylic acid cycle and glyoxylate/dicarboxylate metabolism'	'm1_Idh1(lgFC:-0.094439FDR:0.99644) or m1_Idh2(lgFC:-0.023808FDR:1)'
'm1_HMR_4587'	'm1_H+[m1_p] + m1_NADPH[m1_p] + m1_oxalosuccinate[m1_p] <=> m1_isocitrate[m1_p] + m1_NADP+[m1_p]'	0	0	0	NaN	NaN	'm1_Tricarboxylic acid cycle and glyoxylate/dicarboxylate metabolism'	'm1_Idh1(lgFC:-0.094439FDR:0.99644) or m1_Idh2(lgFC:-0.023808FDR:1)'
'm1_HMR_4588'	'm1_H+[m1_m] + m1_NADH[m1_m] + m1_oxalosuccinate[m1_m] <=> m1_isocitrate[m1_m] + m1_NAD+[m1_m]'	0	0.690744	0.690744	NaN	NaN	'm1_Tricarboxylic acid cycle and glyoxylate/dicarboxylate metabolism'	'm1_Idh1(lgFC:-0.094439FDR:0.99644) or m1_Idh2(lgFC:-0.023808FDR:1)'
'm1_HMR_4589'	'm1_cis-aconitate[m1_m] + m1_H2O[m1_m] <=> m1_isocitrate[m1_m]'	0	-0.176631	0.176631	NaN	NaN	'm1_Tricarboxylic acid cycle and glyoxylate/dicarboxylate metabolism'	'm1_Aco1(lgFC:-0.21438FDR:0.71316) or m1_Aco2(lgFC:0.11886FDR:0.97117)'
'm1_HMR_4652'	'm1_fumarate[m1_m] + m1_ubiquinol[m1_m] <=> m1_succinate[m1_m] + m1_ubiquinone[m1_m]'	-22.4568	-22.0311	44.488	0.981043	-21.9072	'm1_Tricarboxylic acid cycle and glyoxylate/dicarboxylate metabolism'	'm1_Sdha(lgFC:-0.21188FDR:0.72242) or m1_Sdhb(lgFC:-0.23892FDR:0.76764) or m1_Sdhc(lgFC:-0.082991FDR:0.95616) or m1_Sdhd(lgFC:-0.045878FDR:1)'
'm1_HMR_5294'	'm1_citrate[m1_m] => m1_acetate[m1_m] + m1_OAA[m1_m]'	0	0	0	NaN	NaN	'm1_Tricarboxylic acid cycle and glyoxylate/dicarboxylate metabolism'	'm1_Clybl(lgFC:0.079313FDR:1)'
'm1_HMR_5297'	'm1_AKG[m1_m] + m1_CoA[m1_m] + m1_NAD+[m1_m] => m1_CO2[m1_m] + m1_H+[m1_m] + m1_NADH[m1_m] + m1_succinyl-CoA[m1_m]'	22.4536	22.509	44.9625	1.0294	22.9838	'm1_Tricarboxylic acid cycle and glyoxylate/dicarboxylate metabolism'	'm1_Dhtkd1(lgFC:0.30996FDR:0.68671) or m1_Dld(lgFC:0.17181FDR:0.86538) or m1_Dlst(lgFC:0.088818FDR:0.99096) or m1_Ogdh(lgFC:0.05342FDR:0.9961) or m1_Ogdhl(lgFC:0.70021FDR:0.9051) or m1_Pdhx(lgFC:0.19811FDR:0.83486)'
'm1_HMR_6411'	'm1_AKG[m1_m] + m1_lipoamide[m1_m] => m1_CO2[m1_m] + m1_S-succinyldihydrolipoamide[m1_m]'	0	0	0	NaN	NaN	'm1_Tricarboxylic acid cycle and glyoxylate/dicarboxylate metabolism'	'm1_Dhtkd1(lgFC:0.30996FDR:0.68671) or m1_Ogdh(lgFC:0.05342FDR:0.9961) or m1_Ogdhl(lgFC:0.70021FDR:0.9051)'
'm1_HMR_6413'	'm1_3-carboxy-1-hydroxypropyl-ThPP[m1_m] + m1_lipoamide[m1_m] => m1_S-succinyldihydrolipoamide[m1_m] + m1_thiamin-PP[m1_m]'	0	0	0	NaN	NaN	'm1_Tricarboxylic acid cycle and glyoxylate/dicarboxylate metabolism'	'm1_Dhtkd1(lgFC:0.30996FDR:0.68671) or m1_Ogdh(lgFC:0.05342FDR:0.9961) or m1_Ogdhl(lgFC:0.70021FDR:0.9051)'
'm1_HMR_6414'	'm1_CoA[m1_m] + m1_S-succinyldihydrolipoamide[m1_m] <=> m1_dihydrolipoamide[m1_m] + m1_succinyl-CoA[m1_m]'	0	0	0	NaN	NaN	'm1_Tricarboxylic acid cycle and glyoxylate/dicarboxylate metabolism'	'm1_Dlst(lgFC:0.088818FDR:0.99096)'
'm1_HMR_7704'	'm1_glyoxalate[m1_p] + m1_H2O[m1_p] + m1_O2[m1_p] => m1_H2O2[m1_p] + m1_oxalate[m1_p]'	0	0	0	NaN	NaN	'm1_Tricarboxylic acid cycle and glyoxylate/dicarboxylate metabolism'	'm1_Hao1(lgFC:0.087952FDR:0.96032)'
'm1_HMR_7706'	'm1_glycolate[m1_p] + m1_O2[m1_p] => m1_glyoxalate[m1_p] + m1_H2O2[m1_p]'	0	0	0	NaN	NaN	'm1_Tricarboxylic acid cycle and glyoxylate/dicarboxylate metabolism'	'm1_Hao1(lgFC:0.087952FDR:0.96032)'
'm1_HMR_8743'	'm1_FADH2[m1_m] + m1_fumarate[m1_m] <=> m1_FAD[m1_m] + m1_succinate[m1_m]'	0	-0.47787	0.47787	NaN	NaN	'm1_Tricarboxylic acid cycle and glyoxylate/dicarboxylate metabolism'	'm1_Sdha(lgFC:-0.21188FDR:0.72242) or m1_Sdhb(lgFC:-0.23892FDR:0.76764) or m1_Sdhc(lgFC:-0.082991FDR:0.95616) or m1_Sdhd(lgFC:-0.045878FDR:1)'
'm1_HMR_8772'	'm1_ATP[m1_c] + m1_D-xylulose[m1_c] => m1_ADP[m1_c] + m1_D-xylulose-1-phosphate[m1_c]'	0	0	0	NaN	NaN	'm1_Tricarboxylic acid cycle and glyoxylate/dicarboxylate metabolism'	'm1_Khk(lgFC:-0.23364FDR:0.86427)'
'm1_HMR_8773'	'm1_D-xylulose-1-phosphate[m1_c] <=> m1_DHAP[m1_c] + m1_glycolaldehyde[m1_c]'	0	0	0	NaN	NaN	'm1_Tricarboxylic acid cycle and glyoxylate/dicarboxylate metabolism'	'm1_Aldoa(lgFC:0.01694FDR:1) or m1_Aldob(lgFC:0.27821FDR:0.98475) or m1_Aldoc(lgFC:-0.48849FDR:0.97399)'
'm1_HMR_8774'	'm1_hydroxypyruvate[m1_c] => m1_CO2[m1_c] + m1_glycolaldehyde[m1_c]'	0	0	0	NaN	NaN	'm1_Tricarboxylic acid cycle and glyoxylate/dicarboxylate metabolism'	''
'm1_HMR_8775'	'm1_glycolaldehyde[m1_c] + m1_H2O[m1_c] + m1_NAD+[m1_c] => m1_glycolate[m1_c] + m1_H+[m1_c] + m1_NADH[m1_c]'	0	0	0	NaN	NaN	'm1_Tricarboxylic acid cycle and glyoxylate/dicarboxylate metabolism'	'm1_Aldh1a3(lgFC:1.087FDR:0.44812) or m1_Aldh3a2(lgFC:-0.10108FDR:1) or m1_Aldh3b1(lgFC:-0.15805FDR:0.99096) or m1_Aldh7a1(lgFC:-0.19043FDR:0.71271) or m1_Aldh9a1(lgFC:0.08386FDR:0.98923)'
'm1_HMR_8777'	'm1_hydroxypyruvate[m1_m] => m1_CO2[m1_m] + m1_glycolaldehyde[m1_m]'	0	0	0	NaN	NaN	'm1_Tricarboxylic acid cycle and glyoxylate/dicarboxylate metabolism'	''
'm1_HMR_8778'	'm1_glycolaldehyde[m1_m] + m1_H2O[m1_m] + m1_NAD+[m1_m] => m1_glycolate[m1_m] + m1_H+[m1_m] + m1_NADH[m1_m]'	0	0	0	NaN	NaN	'm1_Tricarboxylic acid cycle and glyoxylate/dicarboxylate metabolism'	'm1_Aldh1b1(lgFC:-0.28921FDR:0.73037) or m1_Aldh2(lgFC:-0.029657FDR:1) or m1_Aldh3a2(lgFC:-0.10108FDR:1) or m1_Aldh7a1(lgFC:-0.19043FDR:0.71271) or m1_Aldh9a1(lgFC:0.08386FDR:0.98923)'
'm1_HMR_8779'	'm1_glyoxalate[m1_m] + m1_H+[m1_m] + m1_NADPH[m1_m] => m1_glycolate[m1_m] + m1_NADP+[m1_m]'	0	0	0	NaN	NaN	'm1_Tricarboxylic acid cycle and glyoxylate/dicarboxylate metabolism'	''
'm1_HMR_8780'	'm1_glyoxalate[m1_c] + m1_H2O[m1_c] + m1_NAD+[m1_c] => m1_H+[m1_c] + m1_NADH[m1_c] + m1_oxalate[m1_c]'	0	0	0	NaN	NaN	'm1_Tricarboxylic acid cycle and glyoxylate/dicarboxylate metabolism'	'm1_Htt(lgFC:-0.085968FDR:0.96613) or m1_Ldhb(lgFC:0.00079359FDR:1) or m1_Ldhd(lgFC:0.080092FDR:1)'
'm1_HMR_8781'	'm1_ATP[m1_c] + m1_glycerate[m1_c] => m1_2-phospho-D-glycerate[m1_c] + m1_ADP[m1_c]'	0	0	0	NaN	NaN	'm1_Tricarboxylic acid cycle and glyoxylate/dicarboxylate metabolism'	''
'm1_HMR_8782'	'm1_H+[m1_c] + m1_hydroxypyruvate[m1_c] + m1_NADH[m1_c] => m1_glycerate[m1_c] + m1_NAD+[m1_c]'	0	0	0	NaN	NaN	'm1_Tricarboxylic acid cycle and glyoxylate/dicarboxylate metabolism'	'm1_Grhpr(lgFC:0.020029FDR:1)'
'm1_HMR_3975'	'm1_H2O[m1_r] + m1_PPi[m1_r] => 2 m1_Pi[m1_r]'	0	0	0	1.00657	6.60796e-05	'm1_Oxidative phosphorylation'	'm1_Lhpp(lgFC:0.082283FDR:1) or m1_Ppa1(lgFC:0.21991FDR:0.88034) or m1_Ppa2(lgFC:-0.045483FDR:1)'
'm1_HMR_3977'	'm1_H2O[m1_c] + m1_PPi[m1_c] => 2 m1_Pi[m1_c]'	0.199913	0.0126923	0.212606	1.00657	0.20116	'm1_Oxidative phosphorylation'	'm1_Lhpp(lgFC:0.082283FDR:1) or m1_Ppa1(lgFC:0.21991FDR:0.88034) or m1_Ppa2(lgFC:-0.045483FDR:1)'
'm1_HMR_3979'	'm1_H2O[m1_p] + m1_PPi[m1_p] => 2 m1_Pi[m1_p]'	0	0	0	NaN	NaN	'm1_Oxidative phosphorylation'	'm1_Lhpp(lgFC:0.082283FDR:1) or m1_Ppa1(lgFC:0.21991FDR:0.88034) or m1_Ppa2(lgFC:-0.045483FDR:1)'
'm1_HMR_6911'	'm1_FADH2[m1_m] + m1_ubiquinone[m1_m] <=> m1_FAD[m1_m] + m1_ubiquinol[m1_m]'	0.346175	0.38841	0.734586	1.12201	0.412982	'm1_Oxidative phosphorylation'	'm1_Etfa(lgFC:0.036039FDR:1) or m1_Etfb(lgFC:0.13175FDR:0.94727) or m1_Etfdh(lgFC:0.63198FDR:0.1169) or m1_Sdhc(lgFC:-0.082991FDR:0.95616)'
'm1_HMR_6912'	'm1_H2O[m1_m] + m1_PPi[m1_m] => 2 m1_Pi[m1_m]'	0.0366655	0.00609822	0.0427638	1.00657	0.0369064	'm1_Oxidative phosphorylation'	'm1_Lhpp(lgFC:0.082283FDR:1) or m1_Ppa1(lgFC:0.21991FDR:0.88034) or m1_Ppa2(lgFC:-0.045483FDR:1)'
'm1_HMR_6914'	'4 m1_ferrocytochrome C[m1_m] + 8 m1_H+[m1_m] + m1_O2[m1_m] => 4 m1_ferricytochrome C[m1_m] + 4 m1_H+[m1_c] + 2 m1_H2O[m1_m]'	65.3253	64.7655	130.091	0.996962	65.1858	'm1_Oxidative phosphorylation'	'm1_Cox15(lgFC:0.36736FDR:0.75981) or m1_Cox17(lgFC:0.013889FDR:1) or m1_Cox4i1(lgFC:-0.094515FDR:0.96465) or m1_Cox4i2(lgFC:-0.96124FDR:0.90978) or m1_Cox5a(lgFC:-0.1523FDR:0.88746) or m1_Cox5b(lgFC:0.14221FDR:0.91113) or m1_Cox6a1(lgFC:0.016323FDR:1) or m1_Cox6a2(lgFC:-1.1561FDR:0.88034) or m1_Cox6b1(lgFC:0.12114FDR:0.9104) or m1_Cox6b2(lgFC:1.0348FDR:0.80093) or m1_Cox6c(lgFC:0.075807FDR:0.978…
'm1_HMR_6916'	'm1_ADP[m1_m] + 4 m1_H+[m1_c] + m1_Pi[m1_m] => m1_ATP[m1_m] + 4 m1_H+[m1_m] + m1_H2O[m1_m]'	235.441	233.534	468.975	0.986006	232.384	'm1_Oxidative phosphorylation'	'm1_Atp10a(lgFC:-1.5175FDR:0.21076) or m1_Atp11c(lgFC:0.28473FDR:0.58355) or m1_Atp1a1(lgFC:0.13011FDR:0.97919) or m1_Atp1a2(lgFC:0.069864FDR:1) or m1_Atp1a3(lgFC:-2.0258FDR:0.67603) or m1_Atp1b1(lgFC:-0.32504FDR:0.92145) or m1_Atp1b2(lgFC:1.175FDR:0.42377) or m1_Atp1b3(lgFC:-0.16396FDR:0.6339) or m1_Atp2a1(lgFC:0.56874FDR:0.99146) or m1_Atp2a3(lgFC:-0.7092FDR:0.64977) or m1_Atp2b1(lgFC:0.21364FD…
'm1_HMR_6918'	'2 m1_ferricytochrome C[m1_m] + 2 m1_H+[m1_m] + m1_ubiquinol[m1_m] => 2 m1_ferrocytochrome C[m1_m] + 4 m1_H+[m1_c] + m1_ubiquinone[m1_m]'	130.651	129.531	260.182	0.991954	129.717	'm1_Oxidative phosphorylation'	'm1_Uqcr10(lgFC:-0.23472FDR:0.75675) or m1_Uqcr11(lgFC:-0.19968FDR:0.80657) or m1_Uqcrb(lgFC:0.10835FDR:0.93375) or m1_Uqcrc1(lgFC:-0.16889FDR:0.85336) or m1_Uqcrc2(lgFC:-0.017535FDR:1) or m1_Uqcrfs1(lgFC:0.048571FDR:1) or m1_Uqcrh(lgFC:0.056124FDR:0.99644) or m1_Uqcrq(lgFC:-0.05899FDR:1)'
'm1_HMR_6921'	'5 m1_H+[m1_m] + m1_NADH[m1_m] + m1_ubiquinone[m1_m] => 4 m1_H+[m1_c] + m1_NAD+[m1_m] + m1_ubiquinol[m1_m]'	107.149	106.192	213.341	0.989008	106.013	'm1_Oxidative phosphorylation'	'm1_Ears2(lgFC:0.11833FDR:0.99045) or m1_Ndufa1(lgFC:-0.22774FDR:0.68805) or m1_Ndufa10(lgFC:0.0052709FDR:1) or m1_Ndufa12(lgFC:-0.24065FDR:0.63645) or m1_Ndufa13(lgFC:-0.024213FDR:1) or m1_Ndufa2(lgFC:-0.085056FDR:0.98278) or m1_Ndufa3(lgFC:0.17013FDR:0.81883) or m1_Ndufa4(lgFC:0.11587FDR:0.92145) or m1_Ndufa4l2(lgFC:0.34472FDR:0.89659) or m1_Ndufa5(lgFC:-0.23982FDR:0.67129) or m1_Ndufa8(lgFC:0.…
'm1_HMR_6608'	'm1_hydroxide[m1_c] <=> m1_hydroxyl radical[m1_c]'	0	0	0	NaN	NaN	'm1_ROS detoxification'	''
'm1_HMR_3984'	'2 m1_H2O2[m1_p] => 2 m1_H2O[m1_p] + m1_O2[m1_p]'	0.000502497	0	0.000502497	1	0.000502497	'm1_Miscellaneous'	'm1_Cat(lgFC:0.090213FDR:1)'
'm1_HMR_3960'	'2 m1_H+[m1_c] + 2 m1_O2-[m1_c] => m1_H2O2[m1_c] + m1_O2[m1_c]'	0	0	0	NaN	NaN	'm1_ROS detoxification'	'm1_Sod3(lgFC:-0.44327FDR:0.68503)'
'm1_HMR_8409'	'2 m1_H+[m1_s] + 2 m1_O2-[m1_s] => m1_H2O2[m1_s] + m1_O2[m1_s]'	0	0	0	NaN	NaN	'm1_ROS detoxification'	'm1_Sod3(lgFC:-0.44327FDR:0.68503)'
'm1_HMR_8410'	'2 m1_H+[m1_m] + 2 m1_O2-[m1_m] => m1_H2O2[m1_m] + m1_O2[m1_m]'	0	0	0	NaN	NaN	'm1_ROS detoxification'	''
'm1_HMR_8413'	'2 m1_H+[m1_n] + 2 m1_O2-[m1_n] => m1_H2O2[m1_n] + m1_O2[m1_n]'	0	0	0	NaN	NaN	'm1_ROS detoxification'	''
'm1_HMR_7701'	'm1_H+[m1_c] + m1_NADPH[m1_c] + m1_O2[m1_c] => m1_H2O2[m1_c] + m1_NADP+[m1_c]'	0	0	0	NaN	NaN	'm1_Tyrosine metabolism'	''
'm1_HMR_9838'	'm1_NADPH[m1_c] + m1_O2[m1_c] => m1_H+[m1_c] + m1_NADP+[m1_c] + m1_O2-[m1_c]'	0	0	0	NaN	NaN	'm1_ROS detoxification'	'm1_Cybb(lgFC:-0.53837FDR:0.61894) or m1_Nox4(lgFC:0.24566FDR:1)'
'm1_HMR_4271'	'm1_H+[m1_c] + m1_NADH[m1_m] + m1_NADP+[m1_m] => m1_H+[m1_m] + m1_NAD+[m1_m] + m1_NADPH[m1_m]'	0	0	0	NaN	NaN	'm1_Nicotinate and nicotinamide metabolism'	'm1_Nnt(lgFC:-0.016349FDR:1)'
'm1_HMR_0156'	'm1_AMP[m1_c] + m1_butyryl-CoA[m1_c] + m1_PPi[m1_c] <=> m1_ATP[m1_c] + m1_butyrate[m1_c] + m1_CoA[m1_c]'	0	0	0	NaN	NaN	'm1_Fatty acid activation (cytosolic)'	'm1_Acsm1(lgFC:-0.47537FDR:0.068576) or m1_Acsm2(lgFC:-1.0499FDR:0.44374) or m1_Acsm3(lgFC:0.39859FDR:0.9051) or m1_Acsm5(lgFC:-0.17866FDR:1)'
'm1_HMR_0165'	'm1_AMP[m1_c] + m1_pentanoyl-CoA[m1_c] + m1_PPi[m1_c] <=> m1_ATP[m1_c] + m1_CoA[m1_c] + m1_valeric acid[m1_c]'	0	0	0	NaN	NaN	'm1_Fatty acid activation (cytosolic)'	'm1_Acsm1(lgFC:-0.47537FDR:0.068576) or m1_Acsm2(lgFC:-1.0499FDR:0.44374) or m1_Acsm3(lgFC:0.39859FDR:0.9051) or m1_Acsm5(lgFC:-0.17866FDR:1)'
'm1_HMR_0168'	'm1_AMP[m1_c] + m1_hexanoyl-CoA[m1_c] + m1_PPi[m1_c] <=> m1_ATP[m1_c] + m1_CoA[m1_c] + m1_hexanoic acid[m1_c]'	0	0	0	NaN	NaN	'm1_Fatty acid activation (cytosolic)'	'm1_Acsm1(lgFC:-0.47537FDR:0.068576) or m1_Acsm2(lgFC:-1.0499FDR:0.44374) or m1_Acsm3(lgFC:0.39859FDR:0.9051) or m1_Acsm5(lgFC:-0.17866FDR:1)'
'm1_HMR_0171'	'm1_AMP[m1_c] + m1_heptanoyl-CoA[m1_c] + m1_PPi[m1_c] <=> m1_ATP[m1_c] + m1_CoA[m1_c] + m1_heptylic acid[m1_c]'	0	0	0	NaN	NaN	'm1_Fatty acid activation (cytosolic)'	'm1_Acsm1(lgFC:-0.47537FDR:0.068576) or m1_Acsm2(lgFC:-1.0499FDR:0.44374) or m1_Acsm3(lgFC:0.39859FDR:0.9051) or m1_Acsm5(lgFC:-0.17866FDR:1)'
'm1_HMR_0174'	'm1_AMP[m1_c] + m1_octanoyl-CoA[m1_c] + m1_PPi[m1_c] <=> m1_ATP[m1_c] + m1_CoA[m1_c] + m1_octanoic acid[m1_c]'	0	0	0	NaN	NaN	'm1_Fatty acid activation (cytosolic)'	'm1_Acsm1(lgFC:-0.47537FDR:0.068576) or m1_Acsm2(lgFC:-1.0499FDR:0.44374) or m1_Acsm3(lgFC:0.39859FDR:0.9051) or m1_Acsm5(lgFC:-0.17866FDR:1)'
'm1_HMR_0177'	'm1_AMP[m1_c] + m1_nonanoyl-CoA[m1_c] + m1_PPi[m1_c] <=> m1_ATP[m1_c] + m1_CoA[m1_c] + m1_nonanoic acid[m1_c]'	0	0	0	NaN	NaN	'm1_Fatty acid activation (cytosolic)'	'm1_Acsm1(lgFC:-0.47537FDR:0.068576) or m1_Acsm2(lgFC:-1.0499FDR:0.44374) or m1_Acsm3(lgFC:0.39859FDR:0.9051) or m1_Acsm5(lgFC:-0.17866FDR:1)'
'm1_HMR_0180'	'm1_AMP[m1_c] + m1_decanoyl-CoA[m1_c] + m1_PPi[m1_c] <=> m1_ATP[m1_c] + m1_CoA[m1_c] + m1_decanoic acid[m1_c]'	0	0	0	NaN	NaN	'm1_Fatty acid activation (cytosolic)'	'm1_Acsm1(lgFC:-0.47537FDR:0.068576) or m1_Acsm2(lgFC:-1.0499FDR:0.44374) or m1_Acsm3(lgFC:0.39859FDR:0.9051) or m1_Acsm5(lgFC:-0.17866FDR:1)'
'm1_HMR_0184'	'm1_AMP[m1_c] + m1_PPi[m1_c] + m1_undecanoyl-CoA[m1_c] <=> m1_ATP[m1_c] + m1_CoA[m1_c] + m1_undecylic acid[m1_c]'	0	0	0	NaN	NaN	'm1_Fatty acid activation (cytosolic)'	'm1_Acsm1(lgFC:-0.47537FDR:0.068576) or m1_Acsm2(lgFC:-1.0499FDR:0.44374) or m1_Acsm3(lgFC:0.39859FDR:0.9051) or m1_Acsm5(lgFC:-0.17866FDR:1)'
'm1_HMR_0188'	'm1_AMP[m1_c] + m1_lauroyl-CoA[m1_c] + m1_PPi[m1_c] <=> m1_ATP[m1_c] + m1_CoA[m1_c] + m1_lauric acid[m1_c]'	-0.000327317	-5.65598e-08	0.000327374	0.983176	-0.00032181	'm1_Fatty acid activation (cytosolic)'	'm1_Acsl1(lgFC:0.64998FDR:0.32782) or m1_Acsl3(lgFC:0.32748FDR:0.78747) or m1_Acsl4(lgFC:0.13207FDR:0.95102) or m1_Acsl5(lgFC:-0.25884FDR:0.53644) or m1_Acsl6(lgFC:-1.3583FDR:0.23564) or m1_Slc27a2(lgFC:0.14166FDR:1)'
'm1_HMR_0192'	'm1_AMP[m1_c] + m1_PPi[m1_c] + m1_tridecanoyl-CoA[m1_c] <=> m1_ATP[m1_c] + m1_CoA[m1_c] + m1_tridecylic acid[m1_c]'	-3.03171e-05	-4.04542e-09	3.03211e-05	0.983176	-2.9807e-05	'm1_Fatty acid activation (cytosolic)'	'm1_Acsl1(lgFC:0.64998FDR:0.32782) or m1_Acsl3(lgFC:0.32748FDR:0.78747) or m1_Acsl4(lgFC:0.13207FDR:0.95102) or m1_Acsl5(lgFC:-0.25884FDR:0.53644) or m1_Acsl6(lgFC:-1.3583FDR:0.23564) or m1_Slc27a2(lgFC:0.14166FDR:1)'
'm1_HMR_0196'	'm1_AMP[m1_c] + m1_myristoyl-CoA[m1_c] + m1_PPi[m1_c] <=> m1_ATP[m1_c] + m1_CoA[m1_c] + m1_myristic acid[m1_c]'	-0.00381866	-4.77345e-07	0.00381914	0.983176	-0.00375442	'm1_Fatty acid activation (cytosolic)'	'm1_Acsl1(lgFC:0.64998FDR:0.32782) or m1_Acsl3(lgFC:0.32748FDR:0.78747) or m1_Acsl4(lgFC:0.13207FDR:0.95102) or m1_Acsl5(lgFC:-0.25884FDR:0.53644) or m1_Acsl6(lgFC:-1.3583FDR:0.23564) or m1_Slc27a2(lgFC:0.14166FDR:1)'
'm1_HMR_0200'	'm1_(9E)-tetradecenoic acid[m1_c] + m1_ATP[m1_c] + m1_CoA[m1_c] <=> m1_(9E)-tetradecenoyl-CoA[m1_c] + m1_AMP[m1_c] + m1_PPi[m1_c]'	3.03171e-05	4.04542e-09	3.03211e-05	0.983176	2.9807e-05	'm1_Fatty acid activation (cytosolic)'	'm1_Acsl1(lgFC:0.64998FDR:0.32782) or m1_Acsl3(lgFC:0.32748FDR:0.78747) or m1_Acsl4(lgFC:0.13207FDR:0.95102) or m1_Acsl5(lgFC:-0.25884FDR:0.53644) or m1_Acsl6(lgFC:-1.3583FDR:0.23564) or m1_Slc27a2(lgFC:0.14166FDR:1)'
'm1_HMR_0204'	'm1_(7Z)-tetradecenoic acid[m1_c] + m1_ATP[m1_c] + m1_CoA[m1_c] <=> m1_(7Z)-tetradecenoyl-CoA[m1_c] + m1_AMP[m1_c] + m1_PPi[m1_c]'	3.03171e-05	4.04542e-09	3.03211e-05	0.983176	2.9807e-05	'm1_Fatty acid activation (cytosolic)'	'm1_Acsl1(lgFC:0.64998FDR:0.32782) or m1_Acsl3(lgFC:0.32748FDR:0.78747) or m1_Acsl4(lgFC:0.13207FDR:0.95102) or m1_Acsl5(lgFC:-0.25884FDR:0.53644) or m1_Acsl6(lgFC:-1.3583FDR:0.23564) or m1_Slc27a2(lgFC:0.14166FDR:1)'
'm1_HMR_0209'	'm1_5-tetradecenoyl-CoA[m1_c] + m1_AMP[m1_c] + m1_PPi[m1_c] <=> m1_ATP[m1_c] + m1_CoA[m1_c] + m1_physeteric acid[m1_c]'	-3.03171e-05	-4.04542e-09	3.03211e-05	0.983176	-2.9807e-05	'm1_Fatty acid activation (cytosolic)'	'm1_Acsl1(lgFC:0.64998FDR:0.32782) or m1_Acsl3(lgFC:0.32748FDR:0.78747) or m1_Acsl4(lgFC:0.13207FDR:0.95102) or m1_Acsl5(lgFC:-0.25884FDR:0.53644) or m1_Acsl6(lgFC:-1.3583FDR:0.23564) or m1_Slc27a2(lgFC:0.14166FDR:1)'
'm1_HMR_0213'	'm1_AMP[m1_c] + m1_pentadecanoyl-CoA[m1_c] + m1_PPi[m1_c] <=> m1_ATP[m1_c] + m1_CoA[m1_c] + m1_pentadecylic acid[m1_c]'	-0.000291317	-5.01944e-08	0.000291367	0.983176	-0.000286416	'm1_Fatty acid activation (cytosolic)'	'm1_Acsl1(lgFC:0.64998FDR:0.32782) or m1_Acsl3(lgFC:0.32748FDR:0.78747) or m1_Acsl4(lgFC:0.13207FDR:0.95102) or m1_Acsl5(lgFC:-0.25884FDR:0.53644) or m1_Acsl6(lgFC:-1.3583FDR:0.23564) or m1_Slc27a2(lgFC:0.14166FDR:1)'
'm1_HMR_0217'	'm1_AMP[m1_c] + m1_palmitoyl-CoA[m1_c] + m1_PPi[m1_c] <=> m1_ATP[m1_c] + m1_CoA[m1_c] + m1_palmitate[m1_c]'	-0.0393839	-4.85828e-06	0.0393888	0.983176	-0.0387214	'm1_Fatty acid activation (cytosolic)'	'm1_Acsl1(lgFC:0.64998FDR:0.32782) or m1_Acsl3(lgFC:0.32748FDR:0.78747) or m1_Acsl4(lgFC:0.13207FDR:0.95102) or m1_Acsl5(lgFC:-0.25884FDR:0.53644) or m1_Acsl6(lgFC:-1.3583FDR:0.23564) or m1_Slc27a2(lgFC:0.14166FDR:1)'
'm1_HMR_0226'	'm1_AMP[m1_c] + m1_palmitoleoyl-CoA[m1_c] + m1_PPi[m1_c] <=> m1_ATP[m1_c] + m1_CoA[m1_c] + m1_palmitolate[m1_c]'	-0.00751197	-1.12013e-06	0.00751309	0.983176	-0.00738559	'm1_Fatty acid activation (cytosolic)'	'm1_Acsl1(lgFC:0.64998FDR:0.32782) or m1_Acsl3(lgFC:0.32748FDR:0.78747) or m1_Acsl4(lgFC:0.13207FDR:0.95102) or m1_Acsl5(lgFC:-0.25884FDR:0.53644) or m1_Acsl6(lgFC:-1.3583FDR:0.23564) or m1_Slc27a2(lgFC:0.14166FDR:1)'
'm1_HMR_0233'	'm1_7-hexadecenoyl-CoA[m1_c] + m1_AMP[m1_c] + m1_PPi[m1_c] <=> m1_7-palmitoleic acid[m1_c] + m1_ATP[m1_c] + m1_CoA[m1_c]'	-0.000709838	-4.04542e-09	0.000709842	0.983176	-0.000697896	'm1_Fatty acid activation (cytosolic)'	'm1_Acsl1(lgFC:0.64998FDR:0.32782) or m1_Acsl3(lgFC:0.32748FDR:0.78747) or m1_Acsl4(lgFC:0.13207FDR:0.95102) or m1_Acsl5(lgFC:-0.25884FDR:0.53644) or m1_Acsl6(lgFC:-1.3583FDR:0.23564) or m1_Slc27a2(lgFC:0.14166FDR:1)'
'm1_HMR_0237'	'm1_AMP[m1_c] + m1_heptadecanoyl-CoA[m1_c] + m1_PPi[m1_c] <=> m1_ATP[m1_c] + m1_CoA[m1_c] + m1_margaric acid[m1_c]'	-0.000525317	-9.15694e-08	0.000525409	0.983176	-0.000516479	'm1_Fatty acid activation (cytosolic)'	'm1_Acsl1(lgFC:0.64998FDR:0.32782) or m1_Acsl3(lgFC:0.32748FDR:0.78747) or m1_Acsl4(lgFC:0.13207FDR:0.95102) or m1_Acsl5(lgFC:-0.25884FDR:0.53644) or m1_Acsl6(lgFC:-1.3583FDR:0.23564) or m1_Slc27a2(lgFC:0.14166FDR:1)'
'm1_HMR_0241'	'm1_(10Z)-heptadecenoic acid[m1_c] + m1_ATP[m1_c] + m1_CoA[m1_c] <=> m1_(10Z)-heptadecenoyl-CoA[m1_c] + m1_AMP[m1_c] + m1_PPi[m1_c]'	0.000453317	7.88386e-08	0.000453396	0.983176	0.000445691	'm1_Fatty acid activation (cytosolic)'	'm1_Acsl1(lgFC:0.64998FDR:0.32782) or m1_Acsl3(lgFC:0.32748FDR:0.78747) or m1_Acsl4(lgFC:0.13207FDR:0.95102) or m1_Acsl5(lgFC:-0.25884FDR:0.53644) or m1_Acsl6(lgFC:-1.3583FDR:0.23564) or m1_Slc27a2(lgFC:0.14166FDR:1)'
'm1_HMR_0245'	'm1_9-heptadecenoyl-CoA[m1_c] + m1_AMP[m1_c] + m1_PPi[m1_c] <=> m1_9-heptadecylenic acid[m1_c] + m1_ATP[m1_c] + m1_CoA[m1_c]'	-3.03171e-05	-4.04542e-09	3.03211e-05	0.983176	-2.9807e-05	'm1_Fatty acid activation (cytosolic)'	'm1_Acsl1(lgFC:0.64998FDR:0.32782) or m1_Acsl3(lgFC:0.32748FDR:0.78747) or m1_Acsl4(lgFC:0.13207FDR:0.95102) or m1_Acsl5(lgFC:-0.25884FDR:0.53644) or m1_Acsl6(lgFC:-1.3583FDR:0.23564) or m1_Slc27a2(lgFC:0.14166FDR:1)'
'm1_HMR_0249'	'm1_AMP[m1_c] + m1_PPi[m1_c] + m1_stearoyl-CoA[m1_c] <=> m1_ATP[m1_c] + m1_CoA[m1_c] + m1_stearate[m1_c]'	-0.0171901	-3.96272e-06	0.017194	1.32133	-0.0227138	'm1_Fatty acid activation (cytosolic)'	'm1_Acot2(lgFC:1.72FDR:0.028266) or m1_Acot4(lgFC:0.80531FDR:0.40857) or m1_Acsl1(lgFC:0.64998FDR:0.32782) or m1_Acsl3(lgFC:0.32748FDR:0.78747) or m1_Acsl4(lgFC:0.13207FDR:0.95102) or m1_Acsl5(lgFC:-0.25884FDR:0.53644) or m1_Acsl6(lgFC:-1.3583FDR:0.23564) or m1_Slc27a2(lgFC:0.14166FDR:1)'
'm1_HMR_0255'	'm1_(13Z)-octadecenoic acid[m1_c] + m1_ATP[m1_c] + m1_CoA[m1_c] <=> m1_(13Z)-octadecenoyl-CoA[m1_c] + m1_AMP[m1_c] + m1_PPi[m1_c]'	3.03171e-05	4.04542e-09	3.03211e-05	0.983176	2.9807e-05	'm1_Fatty acid activation (cytosolic)'	'm1_Acsl1(lgFC:0.64998FDR:0.32782) or m1_Acsl3(lgFC:0.32748FDR:0.78747) or m1_Acsl4(lgFC:0.13207FDR:0.95102) or m1_Acsl5(lgFC:-0.25884FDR:0.53644) or m1_Acsl6(lgFC:-1.3583FDR:0.23564) or m1_Slc27a2(lgFC:0.14166FDR:1)'
'm1_HMR_0259'	'm1_AMP[m1_c] + m1_cis-vaccenoyl-CoA[m1_c] + m1_PPi[m1_c] <=> m1_ATP[m1_c] + m1_cis-vaccenic acid[m1_c] + m1_CoA[m1_c]'	-0.00123117	-6.5888e-08	0.00123123	0.983176	-0.00121046	'm1_Fatty acid activation (cytosolic)'	'm1_Acsl1(lgFC:0.64998FDR:0.32782) or m1_Acsl3(lgFC:0.32748FDR:0.78747) or m1_Acsl4(lgFC:0.13207FDR:0.95102) or m1_Acsl5(lgFC:-0.25884FDR:0.53644) or m1_Acsl6(lgFC:-1.3583FDR:0.23564) or m1_Slc27a2(lgFC:0.14166FDR:1)'
'm1_HMR_0263'	'm1_ATP[m1_c] + m1_CoA[m1_c] + m1_oleate[m1_c] => m1_AMP[m1_c] + m1_oleoyl-CoA[m1_c] + m1_PPi[m1_c]'	0.0405045	6.11971e-06	0.0405106	0.983176	0.0398231	'm1_Fatty acid activation (cytosolic)'	'm1_Acsl1(lgFC:0.64998FDR:0.32782) or m1_Acsl3(lgFC:0.32748FDR:0.78747) or m1_Acsl4(lgFC:0.13207FDR:0.95102) or m1_Acsl5(lgFC:-0.25884FDR:0.53644) or m1_Acsl6(lgFC:-1.3583FDR:0.23564) or m1_Slc27a2(lgFC:0.14166FDR:1)'
'm1_HMR_0267'	'm1_(9E)-octadecenoyl-CoA[m1_c] + m1_AMP[m1_c] + m1_PPi[m1_c] <=> m1_ATP[m1_c] + m1_CoA[m1_c] + m1_elaidate[m1_c]'	-3.03171e-05	-4.04542e-09	3.03211e-05	0.983176	-2.9807e-05	'm1_Fatty acid activation (cytosolic)'	'm1_Acsl1(lgFC:0.64998FDR:0.32782) or m1_Acsl3(lgFC:0.32748FDR:0.78747) or m1_Acsl4(lgFC:0.13207FDR:0.95102) or m1_Acsl5(lgFC:-0.25884FDR:0.53644) or m1_Acsl6(lgFC:-1.3583FDR:0.23564) or m1_Slc27a2(lgFC:0.14166FDR:1)'
'm1_HMR_0271'	'm1_(7Z)-octadecenoyl-CoA[m1_c] + m1_AMP[m1_c] + m1_PPi[m1_c] <=> m1_(7Z)-octadecenoic acid[m1_c] + m1_ATP[m1_c] + m1_CoA[m1_c]'	-3.03171e-05	-4.04542e-09	3.03211e-05	0.983176	-2.9807e-05	'm1_Fatty acid activation (cytosolic)'	'm1_Acsl1(lgFC:0.64998FDR:0.32782) or m1_Acsl3(lgFC:0.32748FDR:0.78747) or m1_Acsl4(lgFC:0.13207FDR:0.95102) or m1_Acsl5(lgFC:-0.25884FDR:0.53644) or m1_Acsl6(lgFC:-1.3583FDR:0.23564) or m1_Slc27a2(lgFC:0.14166FDR:1)'
'm1_HMR_0275'	'm1_(6Z,9Z)-octadecadienoic acid[m1_c] + m1_ATP[m1_c] + m1_CoA[m1_c] <=> m1_(6Z,9Z)-octadecadienoyl-CoA[m1_c] + m1_AMP[m1_c] + m1_PPi[m1_c]'	3.03171e-05	4.04542e-09	3.03211e-05	0.983176	2.9807e-05	'm1_Fatty acid activation (cytosolic)'	'm1_Acsl1(lgFC:0.64998FDR:0.32782) or m1_Acsl3(lgFC:0.32748FDR:0.78747) or m1_Acsl4(lgFC:0.13207FDR:0.95102) or m1_Acsl5(lgFC:-0.25884FDR:0.53644) or m1_Acsl6(lgFC:-1.3583FDR:0.23564) or m1_Slc27a2(lgFC:0.14166FDR:1)'
'm1_HMR_0279'	'm1_AMP[m1_c] + m1_nonadecanoyl-CoA[m1_c] + m1_PPi[m1_c] <=> m1_ATP[m1_c] + m1_CoA[m1_c] + m1_nonadecylic acid[m1_c]'	-3.03171e-05	-4.04542e-09	3.03211e-05	0.983176	-2.9807e-05	'm1_Fatty acid activation (cytosolic)'	'm1_Acsl1(lgFC:0.64998FDR:0.32782) or m1_Acsl3(lgFC:0.32748FDR:0.78747) or m1_Acsl4(lgFC:0.13207FDR:0.95102) or m1_Acsl5(lgFC:-0.25884FDR:0.53644) or m1_Acsl6(lgFC:-1.3583FDR:0.23564) or m1_Slc27a2(lgFC:0.14166FDR:1)'
'm1_HMR_0283'	'm1_AMP[m1_c] + m1_eicosanoyl-CoA[m1_c] + m1_PPi[m1_c] <=> m1_ATP[m1_c] + m1_CoA[m1_c] + m1_eicosanoate[m1_c]'	-0.000120317	-1.99589e-08	0.000120337	0.983176	-0.000118293	'm1_Fatty acid activation (cytosolic)'	'm1_Acsl1(lgFC:0.64998FDR:0.32782) or m1_Acsl3(lgFC:0.32748FDR:0.78747) or m1_Acsl4(lgFC:0.13207FDR:0.95102) or m1_Acsl5(lgFC:-0.25884FDR:0.53644) or m1_Acsl6(lgFC:-1.3583FDR:0.23564) or m1_Slc27a2(lgFC:0.14166FDR:1)'
'm1_HMR_0289'	'm1_(13Z)-eicosenoic acid[m1_c] + m1_ATP[m1_c] + m1_CoA[m1_c] <=> m1_(13Z)-eicosenoyl-CoA[m1_c] + m1_AMP[m1_c] + m1_PPi[m1_c]'	3.03171e-05	4.04542e-09	3.03211e-05	0.983176	2.9807e-05	'm1_Fatty acid activation (cytosolic)'	'm1_Acsl1(lgFC:0.64998FDR:0.32782) or m1_Acsl3(lgFC:0.32748FDR:0.78747) or m1_Acsl4(lgFC:0.13207FDR:0.95102) or m1_Acsl5(lgFC:-0.25884FDR:0.53644) or m1_Acsl6(lgFC:-1.3583FDR:0.23564) or m1_Slc27a2(lgFC:0.14166FDR:1)'
'm1_HMR_0293'	'm1_(11Z)-eicosenoyl-CoA[m1_c] + m1_AMP[m1_c] + m1_PPi[m1_c] <=> m1_ATP[m1_c] + m1_cis-gondoic acid[m1_c] + m1_CoA[m1_c]'	-3.03171e-05	-4.04542e-09	3.03211e-05	0.983176	-2.9807e-05	'm1_Fatty acid activation (cytosolic)'	'm1_Acsl1(lgFC:0.64998FDR:0.32782) or m1_Acsl3(lgFC:0.32748FDR:0.78747) or m1_Acsl4(lgFC:0.13207FDR:0.95102) or m1_Acsl5(lgFC:-0.25884FDR:0.53644) or m1_Acsl6(lgFC:-1.3583FDR:0.23564) or m1_Slc27a2(lgFC:0.14166FDR:1)'
'm1_HMR_0297'	'm1_9-eicosenoic acid[m1_c] + m1_ATP[m1_c] + m1_CoA[m1_c] <=> m1_9-eicosenoyl-CoA[m1_c] + m1_AMP[m1_c] + m1_PPi[m1_c]'	3.03171e-05	4.04542e-09	3.03211e-05	0.983176	2.9807e-05	'm1_Fatty acid activation (cytosolic)'	'm1_Acsl1(lgFC:0.64998FDR:0.32782) or m1_Acsl3(lgFC:0.32748FDR:0.78747) or m1_Acsl4(lgFC:0.13207FDR:0.95102) or m1_Acsl5(lgFC:-0.25884FDR:0.53644) or m1_Acsl6(lgFC:-1.3583FDR:0.23564) or m1_Slc27a2(lgFC:0.14166FDR:1)'
'm1_HMR_0301'	'm1_(8Z,11Z)-eicosadienoyl-CoA[m1_c] + m1_AMP[m1_c] + m1_PPi[m1_c] <=> m1_8,11-eicosadienoic acid[m1_c] + m1_ATP[m1_c] + m1_CoA[m1_c]'	-3.03171e-05	-4.04542e-09	3.03211e-05	0.983176	-2.9807e-05	'm1_Fatty acid activation (cytosolic)'	'm1_Acsl1(lgFC:0.64998FDR:0.32782) or m1_Acsl3(lgFC:0.32748FDR:0.78747) or m1_Acsl4(lgFC:0.13207FDR:0.95102) or m1_Acsl5(lgFC:-0.25884FDR:0.53644) or m1_Acsl6(lgFC:-1.3583FDR:0.23564) or m1_Slc27a2(lgFC:0.14166FDR:1)'
'm1_HMR_0305'	'm1_(5Z,8Z,11Z)-eicosatrienoyl-CoA[m1_c] + m1_AMP[m1_c] + m1_PPi[m1_c] <=> m1_ATP[m1_c] + m1_CoA[m1_c] + m1_mead acid[m1_c]'	-6.63171e-05	-1.04108e-08	6.63275e-05	0.983176	-6.52014e-05	'm1_Fatty acid activation (cytosolic)'	'm1_Acsl1(lgFC:0.64998FDR:0.32782) or m1_Acsl3(lgFC:0.32748FDR:0.78747) or m1_Acsl4(lgFC:0.13207FDR:0.95102) or m1_Acsl5(lgFC:-0.25884FDR:0.53644) or m1_Acsl6(lgFC:-1.3583FDR:0.23564) or m1_Slc27a2(lgFC:0.14166FDR:1)'
'm1_HMR_0309'	'm1_AMP[m1_c] + m1_heneicosanoyl-CoA[m1_c] + m1_PPi[m1_c] <=> m1_ATP[m1_c] + m1_CoA[m1_c] + m1_henicosanoic acid[m1_c]'	-3.03171e-05	-4.04542e-09	3.03211e-05	0.983176	-2.9807e-05	'm1_Fatty acid activation (cytosolic)'	'm1_Acsl1(lgFC:0.64998FDR:0.32782) or m1_Acsl3(lgFC:0.32748FDR:0.78747) or m1_Acsl4(lgFC:0.13207FDR:0.95102) or m1_Acsl5(lgFC:-0.25884FDR:0.53644) or m1_Acsl6(lgFC:-1.3583FDR:0.23564) or m1_Slc27a2(lgFC:0.14166FDR:1)'
'm1_HMR_0313'	'm1_AMP[m1_c] + m1_docosanoyl-CoA[m1_c] + m1_PPi[m1_c] <=> m1_ATP[m1_c] + m1_behenic acid[m1_c] + m1_CoA[m1_c]'	-8.43171e-05	-1.35935e-08	8.43307e-05	0.983176	-8.28986e-05	'm1_Fatty acid activation (cytosolic)'	'm1_Acsl1(lgFC:0.64998FDR:0.32782) or m1_Acsl3(lgFC:0.32748FDR:0.78747) or m1_Acsl4(lgFC:0.13207FDR:0.95102) or m1_Acsl5(lgFC:-0.25884FDR:0.53644) or m1_Acsl6(lgFC:-1.3583FDR:0.23564) or m1_Slc27a2(lgFC:0.14166FDR:1)'
'm1_HMR_0319'	'm1_(13Z)-docosenoyl-CoA[m1_c] + m1_AMP[m1_c] + m1_PPi[m1_c] <=> m1_ATP[m1_c] + m1_cis-erucic acid[m1_c] + m1_CoA[m1_c]'	-3.93171e-05	-5.63676e-09	3.93227e-05	0.983176	-3.86556e-05	'm1_Fatty acid activation (cytosolic)'	'm1_Acsl1(lgFC:0.64998FDR:0.32782) or m1_Acsl3(lgFC:0.32748FDR:0.78747) or m1_Acsl4(lgFC:0.13207FDR:0.95102) or m1_Acsl5(lgFC:-0.25884FDR:0.53644) or m1_Acsl6(lgFC:-1.3583FDR:0.23564) or m1_Slc27a2(lgFC:0.14166FDR:1)'
'm1_HMR_0323'	'm1_(11Z)-docosenoyl-CoA[m1_c] + m1_AMP[m1_c] + m1_PPi[m1_c] <=> m1_ATP[m1_c] + m1_cis-cetoleic acid[m1_c] + m1_CoA[m1_c]'	-3.03171e-05	-4.04542e-09	3.03211e-05	0.983176	-2.9807e-05	'm1_Fatty acid activation (cytosolic)'	'm1_Acsl1(lgFC:0.64998FDR:0.32782) or m1_Acsl3(lgFC:0.32748FDR:0.78747) or m1_Acsl4(lgFC:0.13207FDR:0.95102) or m1_Acsl5(lgFC:-0.25884FDR:0.53644) or m1_Acsl6(lgFC:-1.3583FDR:0.23564) or m1_Slc27a2(lgFC:0.14166FDR:1)'
'm1_HMR_0327'	'm1_AMP[m1_c] + m1_PPi[m1_c] + m1_tricosanoyl-CoA[m1_c] <=> m1_ATP[m1_c] + m1_CoA[m1_c] + m1_tricosanoic acid[m1_c]'	-3.93171e-05	-5.63676e-09	3.93227e-05	0.983176	-3.86556e-05	'm1_Fatty acid activation (cytosolic)'	'm1_Acsl1(lgFC:0.64998FDR:0.32782) or m1_Acsl3(lgFC:0.32748FDR:0.78747) or m1_Acsl4(lgFC:0.13207FDR:0.95102) or m1_Acsl5(lgFC:-0.25884FDR:0.53644) or m1_Acsl6(lgFC:-1.3583FDR:0.23564) or m1_Slc27a2(lgFC:0.14166FDR:1)'
'm1_HMR_0331'	'm1_AMP[m1_c] + m1_PPi[m1_c] + m1_tetracosanoyl-CoA[m1_c] <=> m1_ATP[m1_c] + m1_CoA[m1_c] + m1_lignocerate[m1_c]'	-0.000129317	-2.15502e-08	0.000129339	0.983176	-0.000127141	'm1_Fatty acid activation (cytosolic)'	'm1_Acsl1(lgFC:0.64998FDR:0.32782) or m1_Acsl3(lgFC:0.32748FDR:0.78747) or m1_Acsl4(lgFC:0.13207FDR:0.95102) or m1_Acsl5(lgFC:-0.25884FDR:0.53644) or m1_Acsl6(lgFC:-1.3583FDR:0.23564) or m1_Slc27a2(lgFC:0.14166FDR:1)'
'm1_HMR_0337'	'm1_(15Z)-tetracosenoyl-CoA[m1_c] + m1_AMP[m1_c] + m1_PPi[m1_c] <=> m1_ATP[m1_c] + m1_CoA[m1_c] + m1_nervonic acid[m1_c]'	-4.83171e-05	-7.22811e-09	4.83243e-05	0.983176	-4.75042e-05	'm1_Fatty acid activation (cytosolic)'	'm1_Acsl1(lgFC:0.64998FDR:0.32782) or m1_Acsl3(lgFC:0.32748FDR:0.78747) or m1_Acsl4(lgFC:0.13207FDR:0.95102) or m1_Acsl5(lgFC:-0.25884FDR:0.53644) or m1_Acsl6(lgFC:-1.3583FDR:0.23564) or m1_Slc27a2(lgFC:0.14166FDR:1)'
'm1_HMR_0341'	'm1_AMP[m1_c] + m1_hexacosanoyl-CoA[m1_c] + m1_PPi[m1_c] <=> m1_ATP[m1_c] + m1_cerotic acid[m1_c] + m1_CoA[m1_c]'	-6.63171e-05	-1.04108e-08	6.63275e-05	0.983176	-6.52014e-05	'm1_Fatty acid activation (cytosolic)'	'm1_Acsl1(lgFC:0.64998FDR:0.32782) or m1_Acsl3(lgFC:0.32748FDR:0.78747) or m1_Acsl4(lgFC:0.13207FDR:0.95102) or m1_Acsl5(lgFC:-0.25884FDR:0.53644) or m1_Acsl6(lgFC:-1.3583FDR:0.23564) or m1_Slc27a2(lgFC:0.14166FDR:1)'
'm1_HMR_0345'	'm1_AMP[m1_c] + m1_hexacosenoyl-CoA[m1_c] + m1_PPi[m1_c] <=> m1_ATP[m1_c] + m1_CoA[m1_c] + m1_ximenic acid[m1_c]'	-3.03171e-05	-4.04542e-09	3.03211e-05	0.983176	-2.9807e-05	'm1_Fatty acid activation (cytosolic)'	'm1_Acsl1(lgFC:0.64998FDR:0.32782) or m1_Acsl3(lgFC:0.32748FDR:0.78747) or m1_Acsl4(lgFC:0.13207FDR:0.95102) or m1_Acsl5(lgFC:-0.25884FDR:0.53644) or m1_Acsl6(lgFC:-1.3583FDR:0.23564) or m1_Slc27a2(lgFC:0.14166FDR:1)'
'm1_HMR_0349'	'm1_AMP[m1_c] + m1_linolenoyl-CoA[m1_c] + m1_PPi[m1_c] <=> m1_ATP[m1_c] + m1_CoA[m1_c] + m1_linolenate[m1_c]'	-0.000737627	-2.51352e-08	0.000737653	0.983176	-0.000725218	'm1_Fatty acid activation (cytosolic)'	'm1_Acsl1(lgFC:0.64998FDR:0.32782) or m1_Acsl3(lgFC:0.32748FDR:0.78747) or m1_Acsl4(lgFC:0.13207FDR:0.95102) or m1_Acsl5(lgFC:-0.25884FDR:0.53644) or m1_Acsl6(lgFC:-1.3583FDR:0.23564) or m1_Slc27a2(lgFC:0.14166FDR:1)'
'm1_HMR_0353'	'm1_(6Z,9Z,12Z,15Z)-octadecatetraenoyl-CoA[m1_c] + m1_AMP[m1_c] + m1_PPi[m1_c] <=> m1_ATP[m1_c] + m1_CoA[m1_c] + m1_stearidonic acid[m1_c]'	-0.000126089	-1.38617e-08	0.000126103	0.983176	-0.000123968	'm1_Fatty acid activation (cytosolic)'	'm1_Acsl1(lgFC:0.64998FDR:0.32782) or m1_Acsl3(lgFC:0.32748FDR:0.78747) or m1_Acsl4(lgFC:0.13207FDR:0.95102) or m1_Acsl5(lgFC:-0.25884FDR:0.53644) or m1_Acsl6(lgFC:-1.3583FDR:0.23564) or m1_Slc27a2(lgFC:0.14166FDR:1)'
'm1_HMR_0357'	'm1_(8Z,11Z,14Z,17Z)-eicosatetraenoyl-CoA[m1_c] + m1_AMP[m1_c] + m1_PPi[m1_c] <=> m1_ATP[m1_c] + m1_CoA[m1_c] + m1_omega-3-arachidonic acid[m1_c]'	-0.00062536	-8.6993e-08	0.000625447	0.983176	-0.00061484	'm1_Fatty acid activation (cytosolic)'	'm1_Acsl1(lgFC:0.64998FDR:0.32782) or m1_Acsl3(lgFC:0.32748FDR:0.78747) or m1_Acsl4(lgFC:0.13207FDR:0.95102) or m1_Acsl5(lgFC:-0.25884FDR:0.53644) or m1_Acsl6(lgFC:-1.3583FDR:0.23564) or m1_Slc27a2(lgFC:0.14166FDR:1)'
'm1_HMR_0361'	'm1_(5Z,8Z,11Z,14Z,17Z)-eicosapentaenoyl-CoA[m1_c] + m1_AMP[m1_c] + m1_PPi[m1_c] <=> m1_ATP[m1_c] + m1_CoA[m1_c] + m1_EPA[m1_c]'	-0.00107874	-0.00106059	0.00213933	0.983176	-0.00106059	'm1_Fatty acid activation (cytosolic)'	'm1_Acsl1(lgFC:0.64998FDR:0.32782) or m1_Acsl3(lgFC:0.32748FDR:0.78747) or m1_Acsl4(lgFC:0.13207FDR:0.95102) or m1_Acsl5(lgFC:-0.25884FDR:0.53644) or m1_Acsl6(lgFC:-1.3583FDR:0.23564) or m1_Slc27a2(lgFC:0.14166FDR:1)'
'm1_HMR_0365'	'm1_(7Z,10Z,13Z,16Z,19Z)-docosapentaenoyl-CoA[m1_c] + m1_AMP[m1_c] + m1_PPi[m1_c] <=> m1_ATP[m1_c] + m1_CoA[m1_c] + m1_DPA[m1_c]'	-0.000430107	-1.91713e-07	0.000430299	0.983176	-0.000422871	'm1_Fatty acid activation (cytosolic)'	'm1_Acsl1(lgFC:0.64998FDR:0.32782) or m1_Acsl3(lgFC:0.32748FDR:0.78747) or m1_Acsl4(lgFC:0.13207FDR:0.95102) or m1_Acsl5(lgFC:-0.25884FDR:0.53644) or m1_Acsl6(lgFC:-1.3583FDR:0.23564) or m1_Slc27a2(lgFC:0.14166FDR:1)'
'm1_HMR_0369'	'm1_(9Z,12Z,15Z,18Z,21Z)-TPA[m1_c] + m1_ATP[m1_c] + m1_CoA[m1_c] <=> m1_(9Z,12Z,15Z,18Z,21Z)-tetracosapentaenoyl-CoA[m1_c] + m1_AMP[m1_c] + m1_PPi[m1_c]'	3.03171e-05	4.04542e-09	3.03211e-05	0.983176	2.9807e-05	'm1_Fatty acid activation (cytosolic)'	'm1_Acsl1(lgFC:0.64998FDR:0.32782) or m1_Acsl3(lgFC:0.32748FDR:0.78747) or m1_Acsl4(lgFC:0.13207FDR:0.95102) or m1_Acsl5(lgFC:-0.25884FDR:0.53644) or m1_Acsl6(lgFC:-1.3583FDR:0.23564) or m1_Slc27a2(lgFC:0.14166FDR:1)'
'm1_HMR_0373'	'm1_(6Z,9Z,12Z,15Z,18Z,21Z)-THA[m1_c] + m1_ATP[m1_c] + m1_CoA[m1_c] <=> m1_(6Z,9Z,12Z,15Z,18Z,21Z)-tetracosahexaenoyl-CoA[m1_c] + m1_AMP[m1_c] + m1_PPi[m1_c]'	3.03171e-05	4.04542e-09	3.03211e-05	0.983176	2.9807e-05	'm1_Fatty acid activation (cytosolic)'	'm1_Acsl1(lgFC:0.64998FDR:0.32782) or m1_Acsl3(lgFC:0.32748FDR:0.78747) or m1_Acsl4(lgFC:0.13207FDR:0.95102) or m1_Acsl5(lgFC:-0.25884FDR:0.53644) or m1_Acsl6(lgFC:-1.3583FDR:0.23564) or m1_Slc27a2(lgFC:0.14166FDR:1)'
'm1_HMR_0377'	'm1_(4Z,7Z,10Z,13Z,16Z,19Z)-docosahexaenoyl-CoA[m1_c] + m1_AMP[m1_c] + m1_PPi[m1_c] <=> m1_ATP[m1_c] + m1_CoA[m1_c] + m1_DHA[m1_c]'	-0.00209577	-5.3015e-07	0.0020963	0.983176	-0.00206052	'm1_Fatty acid activation (cytosolic)'	'm1_Acsl1(lgFC:0.64998FDR:0.32782) or m1_Acsl3(lgFC:0.32748FDR:0.78747) or m1_Acsl4(lgFC:0.13207FDR:0.95102) or m1_Acsl5(lgFC:-0.25884FDR:0.53644) or m1_Acsl6(lgFC:-1.3583FDR:0.23564) or m1_Slc27a2(lgFC:0.14166FDR:1)'
'm1_HMR_0381'	'm1_(11Z,14Z,17Z)-eicosatrienoic acid[m1_c] + m1_ATP[m1_c] + m1_CoA[m1_c] <=> m1_(11Z,14Z,17Z)-eicosatrienoyl-CoA[m1_c] + m1_AMP[m1_c] + m1_PPi[m1_c]'	0.000165317	2.79156e-08	0.000165345	0.983176	0.000162536	'm1_Fatty acid activation (cytosolic)'	'm1_Acsl1(lgFC:0.64998FDR:0.32782) or m1_Acsl3(lgFC:0.32748FDR:0.78747) or m1_Acsl4(lgFC:0.13207FDR:0.95102) or m1_Acsl5(lgFC:-0.25884FDR:0.53644) or m1_Acsl6(lgFC:-1.3583FDR:0.23564) or m1_Slc27a2(lgFC:0.14166FDR:1)'
'm1_HMR_0385'	'm1_13,16,19-docosatrienoic acid[m1_c] + m1_ATP[m1_c] + m1_CoA[m1_c] <=> m1_13,16,19-docosatrienoyl-CoA[m1_c] + m1_AMP[m1_c] + m1_PPi[m1_c]'	3.03171e-05	4.04542e-09	3.03211e-05	0.983176	2.9807e-05	'm1_Fatty acid activation (cytosolic)'	'm1_Acsl1(lgFC:0.64998FDR:0.32782) or m1_Acsl3(lgFC:0.32748FDR:0.78747) or m1_Acsl4(lgFC:0.13207FDR:0.95102) or m1_Acsl5(lgFC:-0.25884FDR:0.53644) or m1_Acsl6(lgFC:-1.3583FDR:0.23564) or m1_Slc27a2(lgFC:0.14166FDR:1)'
'm1_HMR_0389'	'm1_10,13,16,19-docosatetraenoic acid[m1_c] + m1_ATP[m1_c] + m1_CoA[m1_c] <=> m1_10,13,16,19-docosatetraenoyl-CoA[m1_c] + m1_AMP[m1_c] + m1_PPi[m1_c]'	3.03171e-05	4.04542e-09	3.03211e-05	0.983176	2.9807e-05	'm1_Fatty acid activation (cytosolic)'	'm1_Acsl1(lgFC:0.64998FDR:0.32782) or m1_Acsl3(lgFC:0.32748FDR:0.78747) or m1_Acsl4(lgFC:0.13207FDR:0.95102) or m1_Acsl5(lgFC:-0.25884FDR:0.53644) or m1_Acsl6(lgFC:-1.3583FDR:0.23564) or m1_Slc27a2(lgFC:0.14166FDR:1)'
'm1_HMR_0393'	'm1_12,15,18,21-tetracosatetraenoic acid[m1_c] + m1_ATP[m1_c] + m1_CoA[m1_c] <=> m1_12,15,18,21-tetracosatetraenoyl-CoA[m1_c] + m1_AMP[m1_c] + m1_PPi[m1_c]'	3.03171e-05	4.04542e-09	3.03211e-05	0.983176	2.9807e-05	'm1_Fatty acid activation (cytosolic)'	'm1_Acsl1(lgFC:0.64998FDR:0.32782) or m1_Acsl3(lgFC:0.32748FDR:0.78747) or m1_Acsl4(lgFC:0.13207FDR:0.95102) or m1_Acsl5(lgFC:-0.25884FDR:0.53644) or m1_Acsl6(lgFC:-1.3583FDR:0.23564) or m1_Slc27a2(lgFC:0.14166FDR:1)'
'm1_HMR_0397'	'm1_AMP[m1_c] + m1_linoleoyl-CoA[m1_c] + m1_PPi[m1_c] <=> m1_ATP[m1_c] + m1_CoA[m1_c] + m1_linoleate[m1_c]'	-0.0212216	-1.21673e-06	0.0212228	0.983176	-0.0208646	'm1_Fatty acid activation (cytosolic)'	'm1_Acsl1(lgFC:0.64998FDR:0.32782) or m1_Acsl3(lgFC:0.32748FDR:0.78747) or m1_Acsl4(lgFC:0.13207FDR:0.95102) or m1_Acsl5(lgFC:-0.25884FDR:0.53644) or m1_Acsl6(lgFC:-1.3583FDR:0.23564) or m1_Slc27a2(lgFC:0.14166FDR:1)'
'm1_HMR_0401'	'm1_AMP[m1_c] + m1_gamma-linolenoyl-CoA[m1_c] + m1_PPi[m1_c] <=> m1_ATP[m1_c] + m1_CoA[m1_c] + m1_gamma-linolenate[m1_c]'	-0.000523952	-8.17835e-08	0.000524033	0.983176	-0.000515137	'm1_Fatty acid activation (cytosolic)'	'm1_Acsl1(lgFC:0.64998FDR:0.32782) or m1_Acsl3(lgFC:0.32748FDR:0.78747) or m1_Acsl4(lgFC:0.13207FDR:0.95102) or m1_Acsl5(lgFC:-0.25884FDR:0.53644) or m1_Acsl6(lgFC:-1.3583FDR:0.23564) or m1_Slc27a2(lgFC:0.14166FDR:1)'
'm1_HMR_0405'	'm1_AMP[m1_c] + m1_dihomo-gamma-linolenoyl-CoA[m1_c] + m1_PPi[m1_c] <=> m1_ATP[m1_c] + m1_CoA[m1_c] + m1_dihomo-gamma-linolenate[m1_c]'	-0.00176082	-8.34661e-08	0.00176091	0.983176	-0.0017312	'm1_Fatty acid activation (cytosolic)'	'm1_Acsl1(lgFC:0.64998FDR:0.32782) or m1_Acsl3(lgFC:0.32748FDR:0.78747) or m1_Acsl4(lgFC:0.13207FDR:0.95102) or m1_Acsl5(lgFC:-0.25884FDR:0.53644) or m1_Acsl6(lgFC:-1.3583FDR:0.23564) or m1_Slc27a2(lgFC:0.14166FDR:1)'
'm1_HMR_0409'	'm1_AMP[m1_c] + m1_arachidonyl-CoA[m1_c] + m1_PPi[m1_c] <=> m1_arachidonate[m1_c] + m1_ATP[m1_c] + m1_CoA[m1_c]'	-0.00935123	-1.2021e-06	0.00935244	0.983176	-0.00919391	'm1_Fatty acid activation (cytosolic)'	'm1_Acsl1(lgFC:0.64998FDR:0.32782) or m1_Acsl3(lgFC:0.32748FDR:0.78747) or m1_Acsl4(lgFC:0.13207FDR:0.95102) or m1_Acsl5(lgFC:-0.25884FDR:0.53644) or m1_Acsl6(lgFC:-1.3583FDR:0.23564) or m1_Slc27a2(lgFC:0.14166FDR:1)'
'm1_HMR_0413'	'm1_(7Z,10Z,13Z,16Z)-docosatetraenoyl-CoA[m1_c] + m1_AMP[m1_c] + m1_PPi[m1_c] <=> m1_adrenic acid[m1_c] + m1_ATP[m1_c] + m1_CoA[m1_c]'	-0.000183673	-4.81579e-08	0.000183721	0.983176	-0.000180583	'm1_Fatty acid activation (cytosolic)'	'm1_Acsl1(lgFC:0.64998FDR:0.32782) or m1_Acsl3(lgFC:0.32748FDR:0.78747) or m1_Acsl4(lgFC:0.13207FDR:0.95102) or m1_Acsl5(lgFC:-0.25884FDR:0.53644) or m1_Acsl6(lgFC:-1.3583FDR:0.23564) or m1_Slc27a2(lgFC:0.14166FDR:1)'
'm1_HMR_0417'	'm1_(9Z,12Z,15Z,18Z)-TTA[m1_c] + m1_ATP[m1_c] + m1_CoA[m1_c] <=> m1_(9Z,12Z,15Z,18Z)-tetracosatetraenoyl-CoA[m1_c] + m1_AMP[m1_c] + m1_PPi[m1_c]'	3.03171e-05	4.04542e-09	3.03211e-05	0.983176	2.9807e-05	'm1_Fatty acid activation (cytosolic)'	'm1_Acsl1(lgFC:0.64998FDR:0.32782) or m1_Acsl3(lgFC:0.32748FDR:0.78747) or m1_Acsl4(lgFC:0.13207FDR:0.95102) or m1_Acsl5(lgFC:-0.25884FDR:0.53644) or m1_Acsl6(lgFC:-1.3583FDR:0.23564) or m1_Slc27a2(lgFC:0.14166FDR:1)'
'm1_HMR_0421'	'm1_(6Z,9Z,12Z,15Z,18Z)-TPA[m1_c] + m1_ATP[m1_c] + m1_CoA[m1_c] <=> m1_(6Z,9Z,12Z,15Z,18Z)-tetracosapentaenoyl-CoA[m1_c] + m1_AMP[m1_c] + m1_PPi[m1_c]'	3.03171e-05	4.04542e-09	3.03211e-05	0.983176	2.9807e-05	'm1_Fatty acid activation (cytosolic)'	'm1_Acsl1(lgFC:0.64998FDR:0.32782) or m1_Acsl3(lgFC:0.32748FDR:0.78747) or m1_Acsl4(lgFC:0.13207FDR:0.95102) or m1_Acsl5(lgFC:-0.25884FDR:0.53644) or m1_Acsl6(lgFC:-1.3583FDR:0.23564) or m1_Slc27a2(lgFC:0.14166FDR:1)'
'm1_HMR_0425'	'm1_(4Z,7Z,10Z,13Z,16Z)-DPA[m1_c] + m1_ATP[m1_c] + m1_CoA[m1_c] <=> m1_(4Z,7Z,10Z,13Z,16Z)-docosapentaenoyl-CoA[m1_c] + m1_AMP[m1_c] + m1_PPi[m1_c]'	0.000198967	2.85861e-08	0.000198996	0.983176	0.00019562	'm1_Fatty acid activation (cytosolic)'	'm1_Acsl1(lgFC:0.64998FDR:0.32782) or m1_Acsl3(lgFC:0.32748FDR:0.78747) or m1_Acsl4(lgFC:0.13207FDR:0.95102) or m1_Acsl5(lgFC:-0.25884FDR:0.53644) or m1_Acsl6(lgFC:-1.3583FDR:0.23564) or m1_Slc27a2(lgFC:0.14166FDR:1)'
'm1_HMR_0429'	'm1_(11Z,14Z)-eicosadienoic acid[m1_c] + m1_ATP[m1_c] + m1_CoA[m1_c] <=> m1_(11Z,14Z)-eicosadienoyl-CoA[m1_c] + m1_AMP[m1_c] + m1_PPi[m1_c]'	0.000165317	2.79156e-08	0.000165345	0.983176	0.000162536	'm1_Fatty acid activation (cytosolic)'	'm1_Acsl1(lgFC:0.64998FDR:0.32782) or m1_Acsl3(lgFC:0.32748FDR:0.78747) or m1_Acsl4(lgFC:0.13207FDR:0.95102) or m1_Acsl5(lgFC:-0.25884FDR:0.53644) or m1_Acsl6(lgFC:-1.3583FDR:0.23564) or m1_Slc27a2(lgFC:0.14166FDR:1)'
'm1_HMR_0433'	'm1_(13Z,16Z)-docosadienoic acid[m1_c] + m1_ATP[m1_c] + m1_CoA[m1_c] <=> m1_(13Z,16Z)-docosadienoyl-CoA[m1_c] + m1_AMP[m1_c] + m1_PPi[m1_c]'	3.03171e-05	4.04542e-09	3.03211e-05	0.983176	2.9807e-05	'm1_Fatty acid activation (cytosolic)'	'm1_Acsl1(lgFC:0.64998FDR:0.32782) or m1_Acsl3(lgFC:0.32748FDR:0.78747) or m1_Acsl4(lgFC:0.13207FDR:0.95102) or m1_Acsl5(lgFC:-0.25884FDR:0.53644) or m1_Acsl6(lgFC:-1.3583FDR:0.23564) or m1_Slc27a2(lgFC:0.14166FDR:1)'
'm1_HMR_0437'	'm1_10,13,16-docosatrienoyl-CoA[m1_c] + m1_AMP[m1_c] + m1_PPi[m1_c] <=> m1_10,13,16-docosatriynoic acid[m1_c] + m1_ATP[m1_c] + m1_CoA[m1_c]'	-3.03171e-05	-4.04542e-09	3.03211e-05	0.983176	-2.9807e-05	'm1_Fatty acid activation (cytosolic)'	'm1_Acsl1(lgFC:0.64998FDR:0.32782) or m1_Acsl3(lgFC:0.32748FDR:0.78747) or m1_Acsl4(lgFC:0.13207FDR:0.95102) or m1_Acsl5(lgFC:-0.25884FDR:0.53644) or m1_Acsl6(lgFC:-1.3583FDR:0.23564) or m1_Slc27a2(lgFC:0.14166FDR:1)'
'm1_HMR_2942'	'm1_AMP[m1_r] + m1_lauroyl-CoA[m1_r] + m1_PPi[m1_r] <=> m1_ATP[m1_r] + m1_CoA[m1_r] + m1_lauric acid[m1_r]'	0	0	0	NaN	NaN	'm1_Fatty acid activation (endoplasmic reticular)'	'm1_Acsl1(lgFC:0.64998FDR:0.32782) or m1_Acsl3(lgFC:0.32748FDR:0.78747) or m1_Acsl4(lgFC:0.13207FDR:0.95102) or m1_Acsl5(lgFC:-0.25884FDR:0.53644) or m1_Acsl6(lgFC:-1.3583FDR:0.23564) or m1_Slc27a2(lgFC:0.14166FDR:1)'
'm1_HMR_2943'	'm1_AMP[m1_r] + m1_PPi[m1_r] + m1_tridecanoyl-CoA[m1_r] <=> m1_ATP[m1_r] + m1_CoA[m1_r] + m1_tridecylic acid[m1_r]'	0	0	0	NaN	NaN	'm1_Fatty acid activation (endoplasmic reticular)'	'm1_Acsl1(lgFC:0.64998FDR:0.32782) or m1_Acsl3(lgFC:0.32748FDR:0.78747) or m1_Acsl4(lgFC:0.13207FDR:0.95102) or m1_Acsl5(lgFC:-0.25884FDR:0.53644) or m1_Acsl6(lgFC:-1.3583FDR:0.23564) or m1_Slc27a2(lgFC:0.14166FDR:1)'
'm1_HMR_2944'	'm1_AMP[m1_r] + m1_myristoyl-CoA[m1_r] + m1_PPi[m1_r] <=> m1_ATP[m1_r] + m1_CoA[m1_r] + m1_myristic acid[m1_r]'	0	0	0	NaN	NaN	'm1_Fatty acid activation (endoplasmic reticular)'	'm1_Acsl1(lgFC:0.64998FDR:0.32782) or m1_Acsl3(lgFC:0.32748FDR:0.78747) or m1_Acsl4(lgFC:0.13207FDR:0.95102) or m1_Acsl5(lgFC:-0.25884FDR:0.53644) or m1_Acsl6(lgFC:-1.3583FDR:0.23564) or m1_Slc27a2(lgFC:0.14166FDR:1)'
'm1_HMR_2945'	'm1_5-tetradecenoyl-CoA[m1_r] + m1_AMP[m1_r] + m1_PPi[m1_r] <=> m1_ATP[m1_r] + m1_CoA[m1_r] + m1_physeteric acid[m1_r]'	0	0	0	NaN	NaN	'm1_Fatty acid activation (endoplasmic reticular)'	'm1_Acsl1(lgFC:0.64998FDR:0.32782) or m1_Acsl3(lgFC:0.32748FDR:0.78747) or m1_Acsl4(lgFC:0.13207FDR:0.95102) or m1_Acsl5(lgFC:-0.25884FDR:0.53644) or m1_Acsl6(lgFC:-1.3583FDR:0.23564) or m1_Slc27a2(lgFC:0.14166FDR:1)'
'm1_HMR_2946'	'm1_(9E)-tetradecenoic acid[m1_r] + m1_ATP[m1_r] + m1_CoA[m1_r] <=> m1_(9E)-tetradecenoyl-CoA[m1_r] + m1_AMP[m1_r] + m1_PPi[m1_r]'	0	0	0	NaN	NaN	'm1_Fatty acid activation (endoplasmic reticular)'	'm1_Acsl1(lgFC:0.64998FDR:0.32782) or m1_Acsl3(lgFC:0.32748FDR:0.78747) or m1_Acsl4(lgFC:0.13207FDR:0.95102) or m1_Acsl5(lgFC:-0.25884FDR:0.53644) or m1_Acsl6(lgFC:-1.3583FDR:0.23564) or m1_Slc27a2(lgFC:0.14166FDR:1)'
'm1_HMR_2947'	'm1_(7Z)-tetradecenoic acid[m1_r] + m1_ATP[m1_r] + m1_CoA[m1_r] <=> m1_(7Z)-tetradecenoyl-CoA[m1_r] + m1_AMP[m1_r] + m1_PPi[m1_r]'	0	0	0	NaN	NaN	'm1_Fatty acid activation (endoplasmic reticular)'	'm1_Acsl1(lgFC:0.64998FDR:0.32782) or m1_Acsl3(lgFC:0.32748FDR:0.78747) or m1_Acsl4(lgFC:0.13207FDR:0.95102) or m1_Acsl5(lgFC:-0.25884FDR:0.53644) or m1_Acsl6(lgFC:-1.3583FDR:0.23564) or m1_Slc27a2(lgFC:0.14166FDR:1)'
'm1_HMR_2948'	'm1_AMP[m1_r] + m1_pentadecanoyl-CoA[m1_r] + m1_PPi[m1_r] <=> m1_ATP[m1_r] + m1_CoA[m1_r] + m1_pentadecylic acid[m1_r]'	0	0	0	NaN	NaN	'm1_Fatty acid activation (endoplasmic reticular)'	'm1_Acsl1(lgFC:0.64998FDR:0.32782) or m1_Acsl3(lgFC:0.32748FDR:0.78747) or m1_Acsl4(lgFC:0.13207FDR:0.95102) or m1_Acsl5(lgFC:-0.25884FDR:0.53644) or m1_Acsl6(lgFC:-1.3583FDR:0.23564) or m1_Slc27a2(lgFC:0.14166FDR:1)'
'm1_HMR_2949'	'm1_AMP[m1_r] + m1_palmitoyl-CoA[m1_r] + m1_PPi[m1_r] <=> m1_ATP[m1_r] + m1_CoA[m1_r] + m1_palmitate[m1_r]'	-0.0204939	-0.00933362	0.0298275	0.983176	-0.0201491	'm1_Fatty acid activation (endoplasmic reticular)'	'm1_Acsl1(lgFC:0.64998FDR:0.32782) or m1_Acsl3(lgFC:0.32748FDR:0.78747) or m1_Acsl4(lgFC:0.13207FDR:0.95102) or m1_Acsl5(lgFC:-0.25884FDR:0.53644) or m1_Acsl6(lgFC:-1.3583FDR:0.23564) or m1_Slc27a2(lgFC:0.14166FDR:1)'
'm1_HMR_2951'	'm1_7-hexadecenoyl-CoA[m1_r] + m1_AMP[m1_r] + m1_PPi[m1_r] <=> m1_7-palmitoleic acid[m1_r] + m1_ATP[m1_r] + m1_CoA[m1_r]'	0	0	0	NaN	NaN	'm1_Fatty acid activation (endoplasmic reticular)'	'm1_Acsl1(lgFC:0.64998FDR:0.32782) or m1_Acsl3(lgFC:0.32748FDR:0.78747) or m1_Acsl4(lgFC:0.13207FDR:0.95102) or m1_Acsl5(lgFC:-0.25884FDR:0.53644) or m1_Acsl6(lgFC:-1.3583FDR:0.23564) or m1_Slc27a2(lgFC:0.14166FDR:1)'
'm1_HMR_2952'	'm1_AMP[m1_r] + m1_palmitoleoyl-CoA[m1_r] + m1_PPi[m1_r] <=> m1_ATP[m1_r] + m1_CoA[m1_r] + m1_palmitolate[m1_r]'	0	0	0	NaN	NaN	'm1_Fatty acid activation (endoplasmic reticular)'	'm1_Acsl1(lgFC:0.64998FDR:0.32782) or m1_Acsl3(lgFC:0.32748FDR:0.78747) or m1_Acsl4(lgFC:0.13207FDR:0.95102) or m1_Acsl5(lgFC:-0.25884FDR:0.53644) or m1_Acsl6(lgFC:-1.3583FDR:0.23564) or m1_Slc27a2(lgFC:0.14166FDR:1)'
'm1_HMR_2954'	'm1_AMP[m1_r] + m1_heptadecanoyl-CoA[m1_r] + m1_PPi[m1_r] <=> m1_ATP[m1_r] + m1_CoA[m1_r] + m1_margaric acid[m1_r]'	0	0	0	NaN	NaN	'm1_Fatty acid activation (endoplasmic reticular)'	'm1_Acsl1(lgFC:0.64998FDR:0.32782) or m1_Acsl3(lgFC:0.32748FDR:0.78747) or m1_Acsl4(lgFC:0.13207FDR:0.95102) or m1_Acsl5(lgFC:-0.25884FDR:0.53644) or m1_Acsl6(lgFC:-1.3583FDR:0.23564) or m1_Slc27a2(lgFC:0.14166FDR:1)'
'm1_HMR_2955'	'm1_(10Z)-heptadecenoic acid[m1_r] + m1_ATP[m1_r] + m1_CoA[m1_r] <=> m1_(10Z)-heptadecenoyl-CoA[m1_r] + m1_AMP[m1_r] + m1_PPi[m1_r]'	0	0	0	NaN	NaN	'm1_Fatty acid activation (endoplasmic reticular)'	'm1_Acsl1(lgFC:0.64998FDR:0.32782) or m1_Acsl3(lgFC:0.32748FDR:0.78747) or m1_Acsl4(lgFC:0.13207FDR:0.95102) or m1_Acsl5(lgFC:-0.25884FDR:0.53644) or m1_Acsl6(lgFC:-1.3583FDR:0.23564) or m1_Slc27a2(lgFC:0.14166FDR:1)'
'm1_HMR_2956'	'm1_9-heptadecenoyl-CoA[m1_r] + m1_AMP[m1_r] + m1_PPi[m1_r] <=> m1_9-heptadecylenic acid[m1_r] + m1_ATP[m1_r] + m1_CoA[m1_r]'	0	0	0	NaN	NaN	'm1_Fatty acid activation (endoplasmic reticular)'	'm1_Acsl1(lgFC:0.64998FDR:0.32782) or m1_Acsl3(lgFC:0.32748FDR:0.78747) or m1_Acsl4(lgFC:0.13207FDR:0.95102) or m1_Acsl5(lgFC:-0.25884FDR:0.53644) or m1_Acsl6(lgFC:-1.3583FDR:0.23564) or m1_Slc27a2(lgFC:0.14166FDR:1)'
'm1_HMR_2957'	'm1_AMP[m1_r] + m1_PPi[m1_r] + m1_stearoyl-CoA[m1_r] <=> m1_ATP[m1_r] + m1_CoA[m1_r] + m1_stearate[m1_r]'	1	0	1	NaN	1.32133	'm1_Fatty acid activation (endoplasmic reticular)'	'm1_Acot2(lgFC:1.72FDR:0.028266) or m1_Acot4(lgFC:0.80531FDR:0.40857) or m1_Acsl1(lgFC:0.64998FDR:0.32782) or m1_Acsl3(lgFC:0.32748FDR:0.78747) or m1_Acsl4(lgFC:0.13207FDR:0.95102) or m1_Acsl5(lgFC:-0.25884FDR:0.53644) or m1_Acsl6(lgFC:-1.3583FDR:0.23564) or m1_Slc27a2(lgFC:0.14166FDR:1)'
'm1_HMR_2959'	'm1_ATP[m1_r] + m1_CoA[m1_r] + m1_oleate[m1_r] => m1_AMP[m1_r] + m1_oleoyl-CoA[m1_r] + m1_PPi[m1_r]'	0	0	0	NaN	NaN	'm1_Fatty acid activation (endoplasmic reticular)'	'm1_Acsl1(lgFC:0.64998FDR:0.32782) or m1_Acsl3(lgFC:0.32748FDR:0.78747) or m1_Acsl4(lgFC:0.13207FDR:0.95102) or m1_Acsl5(lgFC:-0.25884FDR:0.53644) or m1_Acsl6(lgFC:-1.3583FDR:0.23564) or m1_Slc27a2(lgFC:0.14166FDR:1)'
'm1_HMR_2961'	'm1_(9E)-octadecenoyl-CoA[m1_r] + m1_AMP[m1_r] + m1_PPi[m1_r] <=> m1_ATP[m1_r] + m1_CoA[m1_r] + m1_elaidate[m1_r]'	0	0	0	NaN	NaN	'm1_Fatty acid activation (endoplasmic reticular)'	'm1_Acsl1(lgFC:0.64998FDR:0.32782) or m1_Acsl3(lgFC:0.32748FDR:0.78747) or m1_Acsl4(lgFC:0.13207FDR:0.95102) or m1_Acsl5(lgFC:-0.25884FDR:0.53644) or m1_Acsl6(lgFC:-1.3583FDR:0.23564) or m1_Slc27a2(lgFC:0.14166FDR:1)'
'm1_HMR_2962'	'm1_(13Z)-octadecenoic acid[m1_r] + m1_ATP[m1_r] + m1_CoA[m1_r] <=> m1_(13Z)-octadecenoyl-CoA[m1_r] + m1_AMP[m1_r] + m1_PPi[m1_r]'	0	0	0	NaN	NaN	'm1_Fatty acid activation (endoplasmic reticular)'	'm1_Acsl1(lgFC:0.64998FDR:0.32782) or m1_Acsl3(lgFC:0.32748FDR:0.78747) or m1_Acsl4(lgFC:0.13207FDR:0.95102) or m1_Acsl5(lgFC:-0.25884FDR:0.53644) or m1_Acsl6(lgFC:-1.3583FDR:0.23564) or m1_Slc27a2(lgFC:0.14166FDR:1)'
'm1_HMR_2963'	'm1_AMP[m1_r] + m1_cis-vaccenoyl-CoA[m1_r] + m1_PPi[m1_r] <=> m1_ATP[m1_r] + m1_cis-vaccenic acid[m1_r] + m1_CoA[m1_r]'	0	0	0	NaN	NaN	'm1_Fatty acid activation (endoplasmic reticular)'	'm1_Acsl1(lgFC:0.64998FDR:0.32782) or m1_Acsl3(lgFC:0.32748FDR:0.78747) or m1_Acsl4(lgFC:0.13207FDR:0.95102) or m1_Acsl5(lgFC:-0.25884FDR:0.53644) or m1_Acsl6(lgFC:-1.3583FDR:0.23564) or m1_Slc27a2(lgFC:0.14166FDR:1)'
'm1_HMR_9853'	'm1_(7Z)-octadecenoyl-CoA[m1_r] + m1_AMP[m1_r] + m1_PPi[m1_r] <=> m1_(7Z)-octadecenoic acid[m1_r] + m1_ATP[m1_r] + m1_CoA[m1_r]'	0	0	0	NaN	NaN	'm1_Fatty acid activation (endoplasmic reticular)'	'm1_Acsl1(lgFC:0.64998FDR:0.32782) or m1_Acsl3(lgFC:0.32748FDR:0.78747) or m1_Acsl4(lgFC:0.13207FDR:0.95102) or m1_Acsl5(lgFC:-0.25884FDR:0.53644) or m1_Acsl6(lgFC:-1.3583FDR:0.23564) or m1_Slc27a2(lgFC:0.14166FDR:1)'
'm1_HMR_2964'	'm1_(6Z,9Z)-octadecadienoic acid[m1_r] + m1_ATP[m1_r] + m1_CoA[m1_r] <=> m1_(6Z,9Z)-octadecadienoyl-CoA[m1_r] + m1_AMP[m1_r] + m1_PPi[m1_r]'	0	0	0	NaN	NaN	'm1_Fatty acid activation (endoplasmic reticular)'	'm1_Acsl1(lgFC:0.64998FDR:0.32782) or m1_Acsl3(lgFC:0.32748FDR:0.78747) or m1_Acsl4(lgFC:0.13207FDR:0.95102) or m1_Acsl5(lgFC:-0.25884FDR:0.53644) or m1_Acsl6(lgFC:-1.3583FDR:0.23564) or m1_Slc27a2(lgFC:0.14166FDR:1)'
'm1_HMR_2965'	'm1_AMP[m1_r] + m1_nonadecanoyl-CoA[m1_r] + m1_PPi[m1_r] <=> m1_ATP[m1_r] + m1_CoA[m1_r] + m1_nonadecylic acid[m1_r]'	0	0	0	NaN	NaN	'm1_Fatty acid activation (endoplasmic reticular)'	'm1_Acsl1(lgFC:0.64998FDR:0.32782) or m1_Acsl3(lgFC:0.32748FDR:0.78747) or m1_Acsl4(lgFC:0.13207FDR:0.95102) or m1_Acsl5(lgFC:-0.25884FDR:0.53644) or m1_Acsl6(lgFC:-1.3583FDR:0.23564) or m1_Slc27a2(lgFC:0.14166FDR:1)'
'm1_HMR_2966'	'm1_AMP[m1_r] + m1_eicosanoyl-CoA[m1_r] + m1_PPi[m1_r] <=> m1_ATP[m1_r] + m1_CoA[m1_r] + m1_eicosanoate[m1_r]'	0	0	0	NaN	NaN	'm1_Fatty acid activation (endoplasmic reticular)'	'm1_Acsl1(lgFC:0.64998FDR:0.32782) or m1_Acsl3(lgFC:0.32748FDR:0.78747) or m1_Acsl4(lgFC:0.13207FDR:0.95102) or m1_Acsl5(lgFC:-0.25884FDR:0.53644) or m1_Acsl6(lgFC:-1.3583FDR:0.23564) or m1_Slc27a2(lgFC:0.14166FDR:1)'
'm1_HMR_2967'	'm1_(11Z)-eicosenoyl-CoA[m1_r] + m1_AMP[m1_r] + m1_PPi[m1_r] <=> m1_ATP[m1_r] + m1_cis-gondoic acid[m1_r] + m1_CoA[m1_r]'	0	0	0	NaN	NaN	'm1_Fatty acid activation (endoplasmic reticular)'	'm1_Acsl1(lgFC:0.64998FDR:0.32782) or m1_Acsl3(lgFC:0.32748FDR:0.78747) or m1_Acsl4(lgFC:0.13207FDR:0.95102) or m1_Acsl5(lgFC:-0.25884FDR:0.53644) or m1_Acsl6(lgFC:-1.3583FDR:0.23564) or m1_Slc27a2(lgFC:0.14166FDR:1)'
'm1_HMR_2968'	'm1_(13Z)-eicosenoic acid[m1_r] + m1_ATP[m1_r] + m1_CoA[m1_r] <=> m1_(13Z)-eicosenoyl-CoA[m1_r] + m1_AMP[m1_r] + m1_PPi[m1_r]'	0	0	0	NaN	NaN	'm1_Fatty acid activation (endoplasmic reticular)'	'm1_Acsl1(lgFC:0.64998FDR:0.32782) or m1_Acsl3(lgFC:0.32748FDR:0.78747) or m1_Acsl4(lgFC:0.13207FDR:0.95102) or m1_Acsl5(lgFC:-0.25884FDR:0.53644) or m1_Acsl6(lgFC:-1.3583FDR:0.23564) or m1_Slc27a2(lgFC:0.14166FDR:1)'
'm1_HMR_2969'	'm1_9-eicosenoic acid[m1_r] + m1_ATP[m1_r] + m1_CoA[m1_r] <=> m1_9-eicosenoyl-CoA[m1_r] + m1_AMP[m1_r] + m1_PPi[m1_r]'	0	0	0	NaN	NaN	'm1_Fatty acid activation (endoplasmic reticular)'	'm1_Acsl1(lgFC:0.64998FDR:0.32782) or m1_Acsl3(lgFC:0.32748FDR:0.78747) or m1_Acsl4(lgFC:0.13207FDR:0.95102) or m1_Acsl5(lgFC:-0.25884FDR:0.53644) or m1_Acsl6(lgFC:-1.3583FDR:0.23564) or m1_Slc27a2(lgFC:0.14166FDR:1)'
'm1_HMR_2970'	'm1_(8Z,11Z)-eicosadienoyl-CoA[m1_r] + m1_AMP[m1_r] + m1_PPi[m1_r] <=> m1_8,11-eicosadienoic acid[m1_r] + m1_ATP[m1_r] + m1_CoA[m1_r]'	0	0	0	NaN	NaN	'm1_Fatty acid activation (endoplasmic reticular)'	'm1_Acsl1(lgFC:0.64998FDR:0.32782) or m1_Acsl3(lgFC:0.32748FDR:0.78747) or m1_Acsl4(lgFC:0.13207FDR:0.95102) or m1_Acsl5(lgFC:-0.25884FDR:0.53644) or m1_Acsl6(lgFC:-1.3583FDR:0.23564) or m1_Slc27a2(lgFC:0.14166FDR:1)'
'm1_HMR_2971'	'm1_(5Z,8Z,11Z)-eicosatrienoyl-CoA[m1_r] + m1_AMP[m1_r] + m1_PPi[m1_r] <=> m1_ATP[m1_r] + m1_CoA[m1_r] + m1_mead acid[m1_r]'	0	0	0	NaN	NaN	'm1_Fatty acid activation (endoplasmic reticular)'	'm1_Acsl1(lgFC:0.64998FDR:0.32782) or m1_Acsl3(lgFC:0.32748FDR:0.78747) or m1_Acsl4(lgFC:0.13207FDR:0.95102) or m1_Acsl5(lgFC:-0.25884FDR:0.53644) or m1_Acsl6(lgFC:-1.3583FDR:0.23564) or m1_Slc27a2(lgFC:0.14166FDR:1)'
'm1_HMR_2972'	'm1_AMP[m1_r] + m1_heneicosanoyl-CoA[m1_r] + m1_PPi[m1_r] <=> m1_ATP[m1_r] + m1_CoA[m1_r] + m1_henicosanoic acid[m1_r]'	0	0	0	NaN	NaN	'm1_Fatty acid activation (endoplasmic reticular)'	'm1_Acsl1(lgFC:0.64998FDR:0.32782) or m1_Acsl3(lgFC:0.32748FDR:0.78747) or m1_Acsl4(lgFC:0.13207FDR:0.95102) or m1_Acsl5(lgFC:-0.25884FDR:0.53644) or m1_Acsl6(lgFC:-1.3583FDR:0.23564) or m1_Slc27a2(lgFC:0.14166FDR:1)'
'm1_HMR_2973'	'm1_AMP[m1_r] + m1_docosanoyl-CoA[m1_r] + m1_PPi[m1_r] <=> m1_ATP[m1_r] + m1_behenic acid[m1_r] + m1_CoA[m1_r]'	0	0	0	NaN	NaN	'm1_Fatty acid activation (endoplasmic reticular)'	'm1_Acsl1(lgFC:0.64998FDR:0.32782) or m1_Acsl3(lgFC:0.32748FDR:0.78747) or m1_Acsl4(lgFC:0.13207FDR:0.95102) or m1_Acsl5(lgFC:-0.25884FDR:0.53644) or m1_Acsl6(lgFC:-1.3583FDR:0.23564) or m1_Slc27a2(lgFC:0.14166FDR:1)'
'm1_HMR_2974'	'm1_(13Z)-docosenoyl-CoA[m1_r] + m1_AMP[m1_r] + m1_PPi[m1_r] <=> m1_ATP[m1_r] + m1_cis-erucic acid[m1_r] + m1_CoA[m1_r]'	0	0	0	NaN	NaN	'm1_Fatty acid activation (endoplasmic reticular)'	'm1_Acsl1(lgFC:0.64998FDR:0.32782) or m1_Acsl3(lgFC:0.32748FDR:0.78747) or m1_Acsl4(lgFC:0.13207FDR:0.95102) or m1_Acsl5(lgFC:-0.25884FDR:0.53644) or m1_Acsl6(lgFC:-1.3583FDR:0.23564) or m1_Slc27a2(lgFC:0.14166FDR:1)'
'm1_HMR_2975'	'm1_(11Z)-docosenoyl-CoA[m1_r] + m1_AMP[m1_r] + m1_PPi[m1_r] <=> m1_ATP[m1_r] + m1_cis-cetoleic acid[m1_r] + m1_CoA[m1_r]'	0	0	0	NaN	NaN	'm1_Fatty acid activation (endoplasmic reticular)'	'm1_Acsl1(lgFC:0.64998FDR:0.32782) or m1_Acsl3(lgFC:0.32748FDR:0.78747) or m1_Acsl4(lgFC:0.13207FDR:0.95102) or m1_Acsl5(lgFC:-0.25884FDR:0.53644) or m1_Acsl6(lgFC:-1.3583FDR:0.23564) or m1_Slc27a2(lgFC:0.14166FDR:1)'
'm1_HMR_2976'	'm1_AMP[m1_r] + m1_PPi[m1_r] + m1_tricosanoyl-CoA[m1_r] <=> m1_ATP[m1_r] + m1_CoA[m1_r] + m1_tricosanoic acid[m1_r]'	0	0	0	NaN	NaN	'm1_Fatty acid activation (endoplasmic reticular)'	'm1_Acsl1(lgFC:0.64998FDR:0.32782) or m1_Acsl3(lgFC:0.32748FDR:0.78747) or m1_Acsl4(lgFC:0.13207FDR:0.95102) or m1_Acsl5(lgFC:-0.25884FDR:0.53644) or m1_Acsl6(lgFC:-1.3583FDR:0.23564) or m1_Slc27a2(lgFC:0.14166FDR:1)'
'm1_HMR_2977'	'm1_AMP[m1_r] + m1_PPi[m1_r] + m1_tetracosanoyl-CoA[m1_r] <=> m1_ATP[m1_r] + m1_CoA[m1_r] + m1_lignocerate[m1_r]'	0	0	0	NaN	NaN	'm1_Fatty acid activation (endoplasmic reticular)'	'm1_Acsl1(lgFC:0.64998FDR:0.32782) or m1_Acsl3(lgFC:0.32748FDR:0.78747) or m1_Acsl4(lgFC:0.13207FDR:0.95102) or m1_Acsl5(lgFC:-0.25884FDR:0.53644) or m1_Acsl6(lgFC:-1.3583FDR:0.23564) or m1_Slc27a2(lgFC:0.14166FDR:1)'
'm1_HMR_2978'	'm1_(15Z)-tetracosenoyl-CoA[m1_r] + m1_AMP[m1_r] + m1_PPi[m1_r] <=> m1_ATP[m1_r] + m1_CoA[m1_r] + m1_nervonic acid[m1_r]'	0	0	0	NaN	NaN	'm1_Fatty acid activation (endoplasmic reticular)'	'm1_Acsl1(lgFC:0.64998FDR:0.32782) or m1_Acsl3(lgFC:0.32748FDR:0.78747) or m1_Acsl4(lgFC:0.13207FDR:0.95102) or m1_Acsl5(lgFC:-0.25884FDR:0.53644) or m1_Acsl6(lgFC:-1.3583FDR:0.23564) or m1_Slc27a2(lgFC:0.14166FDR:1)'
'm1_HMR_2979'	'm1_AMP[m1_r] + m1_hexacosanoyl-CoA[m1_r] + m1_PPi[m1_r] <=> m1_ATP[m1_r] + m1_cerotic acid[m1_r] + m1_CoA[m1_r]'	0	0	0	NaN	NaN	'm1_Fatty acid activation (endoplasmic reticular)'	'm1_Acsl1(lgFC:0.64998FDR:0.32782) or m1_Acsl3(lgFC:0.32748FDR:0.78747) or m1_Acsl4(lgFC:0.13207FDR:0.95102) or m1_Acsl5(lgFC:-0.25884FDR:0.53644) or m1_Acsl6(lgFC:-1.3583FDR:0.23564) or m1_Slc27a2(lgFC:0.14166FDR:1)'
'm1_HMR_2980'	'm1_AMP[m1_r] + m1_hexacosenoyl-CoA[m1_r] + m1_PPi[m1_r] <=> m1_ATP[m1_r] + m1_CoA[m1_r] + m1_ximenic acid[m1_r]'	0	0	0	NaN	NaN	'm1_Fatty acid activation (endoplasmic reticular)'	'm1_Acsl1(lgFC:0.64998FDR:0.32782) or m1_Acsl3(lgFC:0.32748FDR:0.78747) or m1_Acsl4(lgFC:0.13207FDR:0.95102) or m1_Acsl5(lgFC:-0.25884FDR:0.53644) or m1_Acsl6(lgFC:-1.3583FDR:0.23564) or m1_Slc27a2(lgFC:0.14166FDR:1)'
'm1_HMR_9854'	'm1_10,13,16,19-docosatetraenoic acid[m1_r] + m1_ATP[m1_r] + m1_CoA[m1_r] <=> m1_10,13,16,19-docosatetraenoyl-CoA[m1_r] + m1_AMP[m1_r] + m1_PPi[m1_r]'	0	0	0	NaN	NaN	'm1_Fatty acid activation (endoplasmic reticular)'	'm1_Acsl1(lgFC:0.64998FDR:0.32782) or m1_Acsl3(lgFC:0.32748FDR:0.78747) or m1_Acsl4(lgFC:0.13207FDR:0.95102) or m1_Acsl5(lgFC:-0.25884FDR:0.53644) or m1_Acsl6(lgFC:-1.3583FDR:0.23564) or m1_Slc27a2(lgFC:0.14166FDR:1)'
'm1_HMR_9855'	'm1_12,15,18,21-tetracosatetraenoic acid[m1_r] + m1_ATP[m1_r] + m1_CoA[m1_r] <=> m1_12,15,18,21-tetracosatetraenoyl-CoA[m1_r] + m1_AMP[m1_r] + m1_PPi[m1_r]'	0	0	0	NaN	NaN	'm1_Fatty acid activation (endoplasmic reticular)'	'm1_Acsl1(lgFC:0.64998FDR:0.32782) or m1_Acsl3(lgFC:0.32748FDR:0.78747) or m1_Acsl4(lgFC:0.13207FDR:0.95102) or m1_Acsl5(lgFC:-0.25884FDR:0.53644) or m1_Acsl6(lgFC:-1.3583FDR:0.23564) or m1_Slc27a2(lgFC:0.14166FDR:1)'
'm1_HMR_2981'	'm1_AMP[m1_r] + m1_linolenoyl-CoA[m1_r] + m1_PPi[m1_r] <=> m1_ATP[m1_r] + m1_CoA[m1_r] + m1_linolenate[m1_r]'	0	0	0	NaN	NaN	'm1_Fatty acid activation (endoplasmic reticular)'	'm1_Acsl1(lgFC:0.64998FDR:0.32782) or m1_Acsl3(lgFC:0.32748FDR:0.78747) or m1_Acsl4(lgFC:0.13207FDR:0.95102) or m1_Acsl5(lgFC:-0.25884FDR:0.53644) or m1_Acsl6(lgFC:-1.3583FDR:0.23564) or m1_Slc27a2(lgFC:0.14166FDR:1)'
'm1_HMR_2982'	'm1_(6Z,9Z,12Z,15Z)-octadecatetraenoyl-CoA[m1_r] + m1_AMP[m1_r] + m1_PPi[m1_r] <=> m1_ATP[m1_r] + m1_CoA[m1_r] + m1_stearidonic acid[m1_r]'	0	0	0	NaN	NaN	'm1_Fatty acid activation (endoplasmic reticular)'	'm1_Acsl1(lgFC:0.64998FDR:0.32782) or m1_Acsl3(lgFC:0.32748FDR:0.78747) or m1_Acsl4(lgFC:0.13207FDR:0.95102) or m1_Acsl5(lgFC:-0.25884FDR:0.53644) or m1_Acsl6(lgFC:-1.3583FDR:0.23564) or m1_Slc27a2(lgFC:0.14166FDR:1)'
'm1_HMR_2983'	'm1_(8Z,11Z,14Z,17Z)-eicosatetraenoyl-CoA[m1_r] + m1_AMP[m1_r] + m1_PPi[m1_r] <=> m1_ATP[m1_r] + m1_CoA[m1_r] + m1_omega-3-arachidonic acid[m1_r]'	0	0	0	NaN	NaN	'm1_Fatty acid activation (endoplasmic reticular)'	'm1_Acsl1(lgFC:0.64998FDR:0.32782) or m1_Acsl3(lgFC:0.32748FDR:0.78747) or m1_Acsl4(lgFC:0.13207FDR:0.95102) or m1_Acsl5(lgFC:-0.25884FDR:0.53644) or m1_Acsl6(lgFC:-1.3583FDR:0.23564) or m1_Slc27a2(lgFC:0.14166FDR:1)'
'm1_HMR_2984'	'm1_(5Z,8Z,11Z,14Z,17Z)-eicosapentaenoyl-CoA[m1_r] + m1_AMP[m1_r] + m1_PPi[m1_r] <=> m1_ATP[m1_r] + m1_CoA[m1_r] + m1_EPA[m1_r]'	0	0.00106042	0.00106042	NaN	NaN	'm1_Fatty acid activation (endoplasmic reticular)'	'm1_Acsl1(lgFC:0.64998FDR:0.32782) or m1_Acsl3(lgFC:0.32748FDR:0.78747) or m1_Acsl4(lgFC:0.13207FDR:0.95102) or m1_Acsl5(lgFC:-0.25884FDR:0.53644) or m1_Acsl6(lgFC:-1.3583FDR:0.23564) or m1_Slc27a2(lgFC:0.14166FDR:1)'
'm1_HMR_2985'	'm1_(7Z,10Z,13Z,16Z,19Z)-docosapentaenoyl-CoA[m1_r] + m1_AMP[m1_r] + m1_PPi[m1_r] <=> m1_ATP[m1_r] + m1_CoA[m1_r] + m1_DPA[m1_r]'	0	0	0	NaN	NaN	'm1_Fatty acid activation (endoplasmic reticular)'	'm1_Acsl1(lgFC:0.64998FDR:0.32782) or m1_Acsl3(lgFC:0.32748FDR:0.78747) or m1_Acsl4(lgFC:0.13207FDR:0.95102) or m1_Acsl5(lgFC:-0.25884FDR:0.53644) or m1_Acsl6(lgFC:-1.3583FDR:0.23564) or m1_Slc27a2(lgFC:0.14166FDR:1)'
'm1_HMR_2986'	'm1_(9Z,12Z,15Z,18Z,21Z)-TPA[m1_r] + m1_ATP[m1_r] + m1_CoA[m1_r] <=> m1_(9Z,12Z,15Z,18Z,21Z)-tetracosapentaenoyl-CoA[m1_r] + m1_AMP[m1_r] + m1_PPi[m1_r]'	0	0	0	NaN	NaN	'm1_Fatty acid activation (endoplasmic reticular)'	'm1_Acsl1(lgFC:0.64998FDR:0.32782) or m1_Acsl3(lgFC:0.32748FDR:0.78747) or m1_Acsl4(lgFC:0.13207FDR:0.95102) or m1_Acsl5(lgFC:-0.25884FDR:0.53644) or m1_Acsl6(lgFC:-1.3583FDR:0.23564) or m1_Slc27a2(lgFC:0.14166FDR:1)'
'm1_HMR_2987'	'm1_(6Z,9Z,12Z,15Z,18Z,21Z)-THA[m1_r] + m1_ATP[m1_r] + m1_CoA[m1_r] <=> m1_(6Z,9Z,12Z,15Z,18Z,21Z)-tetracosahexaenoyl-CoA[m1_r] + m1_AMP[m1_r] + m1_PPi[m1_r]'	0	0	0	NaN	NaN	'm1_Fatty acid activation (endoplasmic reticular)'	'm1_Acsl1(lgFC:0.64998FDR:0.32782) or m1_Acsl3(lgFC:0.32748FDR:0.78747) or m1_Acsl4(lgFC:0.13207FDR:0.95102) or m1_Acsl5(lgFC:-0.25884FDR:0.53644) or m1_Acsl6(lgFC:-1.3583FDR:0.23564) or m1_Slc27a2(lgFC:0.14166FDR:1)'
'm1_HMR_2988'	'm1_(4Z,7Z,10Z,13Z,16Z,19Z)-docosahexaenoyl-CoA[m1_r] + m1_AMP[m1_r] + m1_PPi[m1_r] <=> m1_ATP[m1_r] + m1_CoA[m1_r] + m1_DHA[m1_r]'	0	0	0	NaN	NaN	'm1_Fatty acid activation (endoplasmic reticular)'	'm1_Acsl1(lgFC:0.64998FDR:0.32782) or m1_Acsl3(lgFC:0.32748FDR:0.78747) or m1_Acsl4(lgFC:0.13207FDR:0.95102) or m1_Acsl5(lgFC:-0.25884FDR:0.53644) or m1_Acsl6(lgFC:-1.3583FDR:0.23564) or m1_Slc27a2(lgFC:0.14166FDR:1)'
'm1_HMR_2989'	'm1_(11Z,14Z,17Z)-eicosatrienoic acid[m1_r] + m1_ATP[m1_r] + m1_CoA[m1_r] <=> m1_(11Z,14Z,17Z)-eicosatrienoyl-CoA[m1_r] + m1_AMP[m1_r] + m1_PPi[m1_r]'	0	0	0	NaN	NaN	'm1_Fatty acid activation (endoplasmic reticular)'	'm1_Acsl1(lgFC:0.64998FDR:0.32782) or m1_Acsl3(lgFC:0.32748FDR:0.78747) or m1_Acsl4(lgFC:0.13207FDR:0.95102) or m1_Acsl5(lgFC:-0.25884FDR:0.53644) or m1_Acsl6(lgFC:-1.3583FDR:0.23564) or m1_Slc27a2(lgFC:0.14166FDR:1)'
'm1_HMR_2990'	'm1_13,16,19-docosatrienoic acid[m1_r] + m1_ATP[m1_r] + m1_CoA[m1_r] <=> m1_13,16,19-docosatrienoyl-CoA[m1_r] + m1_AMP[m1_r] + m1_PPi[m1_r]'	0	0	0	NaN	NaN	'm1_Fatty acid activation (endoplasmic reticular)'	'm1_Acsl1(lgFC:0.64998FDR:0.32782) or m1_Acsl3(lgFC:0.32748FDR:0.78747) or m1_Acsl4(lgFC:0.13207FDR:0.95102) or m1_Acsl5(lgFC:-0.25884FDR:0.53644) or m1_Acsl6(lgFC:-1.3583FDR:0.23564) or m1_Slc27a2(lgFC:0.14166FDR:1)'
'm1_HMR_2991'	'm1_AMP[m1_r] + m1_linoleoyl-CoA[m1_r] + m1_PPi[m1_r] <=> m1_ATP[m1_r] + m1_CoA[m1_r] + m1_linoleate[m1_r]'	0	0	0	NaN	NaN	'm1_Fatty acid activation (endoplasmic reticular)'	'm1_Acsl1(lgFC:0.64998FDR:0.32782) or m1_Acsl3(lgFC:0.32748FDR:0.78747) or m1_Acsl4(lgFC:0.13207FDR:0.95102) or m1_Acsl5(lgFC:-0.25884FDR:0.53644) or m1_Acsl6(lgFC:-1.3583FDR:0.23564) or m1_Slc27a2(lgFC:0.14166FDR:1)'
'm1_HMR_2992'	'm1_AMP[m1_r] + m1_gamma-linolenoyl-CoA[m1_r] + m1_PPi[m1_r] <=> m1_ATP[m1_r] + m1_CoA[m1_r] + m1_gamma-linolenate[m1_r]'	0	0	0	NaN	NaN	'm1_Fatty acid activation (endoplasmic reticular)'	'm1_Acsl1(lgFC:0.64998FDR:0.32782) or m1_Acsl3(lgFC:0.32748FDR:0.78747) or m1_Acsl4(lgFC:0.13207FDR:0.95102) or m1_Acsl5(lgFC:-0.25884FDR:0.53644) or m1_Acsl6(lgFC:-1.3583FDR:0.23564) or m1_Slc27a2(lgFC:0.14166FDR:1)'
'm1_HMR_2994'	'm1_AMP[m1_r] + m1_dihomo-gamma-linolenoyl-CoA[m1_r] + m1_PPi[m1_r] <=> m1_ATP[m1_r] + m1_CoA[m1_r] + m1_dihomo-gamma-linolenate[m1_r]'	0	0	0	NaN	NaN	'm1_Fatty acid activation (endoplasmic reticular)'	'm1_Acsl1(lgFC:0.64998FDR:0.32782) or m1_Acsl3(lgFC:0.32748FDR:0.78747) or m1_Acsl4(lgFC:0.13207FDR:0.95102) or m1_Acsl5(lgFC:-0.25884FDR:0.53644) or m1_Acsl6(lgFC:-1.3583FDR:0.23564) or m1_Slc27a2(lgFC:0.14166FDR:1)'
'm1_HMR_2996'	'm1_AMP[m1_r] + m1_arachidonyl-CoA[m1_r] + m1_PPi[m1_r] <=> m1_arachidonate[m1_r] + m1_ATP[m1_r] + m1_CoA[m1_r]'	0	0	0	NaN	NaN	'm1_Fatty acid activation (endoplasmic reticular)'	'm1_Acsl1(lgFC:0.64998FDR:0.32782) or m1_Acsl3(lgFC:0.32748FDR:0.78747) or m1_Acsl4(lgFC:0.13207FDR:0.95102) or m1_Acsl5(lgFC:-0.25884FDR:0.53644) or m1_Acsl6(lgFC:-1.3583FDR:0.23564) or m1_Slc27a2(lgFC:0.14166FDR:1)'
'm1_HMR_2998'	'm1_(7Z,10Z,13Z,16Z)-docosatetraenoyl-CoA[m1_r] + m1_AMP[m1_r] + m1_PPi[m1_r] <=> m1_adrenic acid[m1_r] + m1_ATP[m1_r] + m1_CoA[m1_r]'	0	0	0	NaN	NaN	'm1_Fatty acid activation (endoplasmic reticular)'	'm1_Acsl1(lgFC:0.64998FDR:0.32782) or m1_Acsl3(lgFC:0.32748FDR:0.78747) or m1_Acsl4(lgFC:0.13207FDR:0.95102) or m1_Acsl5(lgFC:-0.25884FDR:0.53644) or m1_Acsl6(lgFC:-1.3583FDR:0.23564) or m1_Slc27a2(lgFC:0.14166FDR:1)'
'm1_HMR_2999'	'm1_(9Z,12Z,15Z,18Z)-TTA[m1_r] + m1_ATP[m1_r] + m1_CoA[m1_r] <=> m1_(9Z,12Z,15Z,18Z)-tetracosatetraenoyl-CoA[m1_r] + m1_AMP[m1_r] + m1_PPi[m1_r]'	0	0	0	NaN	NaN	'm1_Fatty acid activation (endoplasmic reticular)'	'm1_Acsl1(lgFC:0.64998FDR:0.32782) or m1_Acsl3(lgFC:0.32748FDR:0.78747) or m1_Acsl4(lgFC:0.13207FDR:0.95102) or m1_Acsl5(lgFC:-0.25884FDR:0.53644) or m1_Acsl6(lgFC:-1.3583FDR:0.23564) or m1_Slc27a2(lgFC:0.14166FDR:1)'
'm1_HMR_3000'	'm1_(6Z,9Z,12Z,15Z,18Z)-TPA[m1_r] + m1_ATP[m1_r] + m1_CoA[m1_r] <=> m1_(6Z,9Z,12Z,15Z,18Z)-tetracosapentaenoyl-CoA[m1_r] + m1_AMP[m1_r] + m1_PPi[m1_r]'	0	0	0	NaN	NaN	'm1_Fatty acid activation (endoplasmic reticular)'	'm1_Acsl1(lgFC:0.64998FDR:0.32782) or m1_Acsl3(lgFC:0.32748FDR:0.78747) or m1_Acsl4(lgFC:0.13207FDR:0.95102) or m1_Acsl5(lgFC:-0.25884FDR:0.53644) or m1_Acsl6(lgFC:-1.3583FDR:0.23564) or m1_Slc27a2(lgFC:0.14166FDR:1)'
'm1_HMR_3001'	'm1_(4Z,7Z,10Z,13Z,16Z)-DPA[m1_r] + m1_ATP[m1_r] + m1_CoA[m1_r] <=> m1_(4Z,7Z,10Z,13Z,16Z)-docosapentaenoyl-CoA[m1_r] + m1_AMP[m1_r] + m1_PPi[m1_r]'	0	0	0	NaN	NaN	'm1_Fatty acid activation (endoplasmic reticular)'	'm1_Acsl1(lgFC:0.64998FDR:0.32782) or m1_Acsl3(lgFC:0.32748FDR:0.78747) or m1_Acsl4(lgFC:0.13207FDR:0.95102) or m1_Acsl5(lgFC:-0.25884FDR:0.53644) or m1_Acsl6(lgFC:-1.3583FDR:0.23564) or m1_Slc27a2(lgFC:0.14166FDR:1)'
'm1_HMR_3002'	'm1_(11Z,14Z)-eicosadienoic acid[m1_r] + m1_ATP[m1_r] + m1_CoA[m1_r] <=> m1_(11Z,14Z)-eicosadienoyl-CoA[m1_r] + m1_AMP[m1_r] + m1_PPi[m1_r]'	0	0	0	NaN	NaN	'm1_Fatty acid activation (endoplasmic reticular)'	'm1_Acsl1(lgFC:0.64998FDR:0.32782) or m1_Acsl3(lgFC:0.32748FDR:0.78747) or m1_Acsl4(lgFC:0.13207FDR:0.95102) or m1_Acsl5(lgFC:-0.25884FDR:0.53644) or m1_Acsl6(lgFC:-1.3583FDR:0.23564) or m1_Slc27a2(lgFC:0.14166FDR:1)'
'm1_HMR_3003'	'm1_(13Z,16Z)-docosadienoic acid[m1_r] + m1_ATP[m1_r] + m1_CoA[m1_r] <=> m1_(13Z,16Z)-docosadienoyl-CoA[m1_r] + m1_AMP[m1_r] + m1_PPi[m1_r]'	0	0	0	NaN	NaN	'm1_Fatty acid activation (endoplasmic reticular)'	'm1_Acsl1(lgFC:0.64998FDR:0.32782) or m1_Acsl3(lgFC:0.32748FDR:0.78747) or m1_Acsl4(lgFC:0.13207FDR:0.95102) or m1_Acsl5(lgFC:-0.25884FDR:0.53644) or m1_Acsl6(lgFC:-1.3583FDR:0.23564) or m1_Slc27a2(lgFC:0.14166FDR:1)'
'm1_HMR_9856'	'm1_10,13,16-docosatrienoyl-CoA[m1_r] + m1_AMP[m1_r] + m1_PPi[m1_r] <=> m1_10,13,16-docosatriynoic acid[m1_r] + m1_ATP[m1_r] + m1_CoA[m1_r]'	0	0	0	NaN	NaN	'm1_Fatty acid activation (endoplasmic reticular)'	'm1_Acsl1(lgFC:0.64998FDR:0.32782) or m1_Acsl3(lgFC:0.32748FDR:0.78747) or m1_Acsl4(lgFC:0.13207FDR:0.95102) or m1_Acsl5(lgFC:-0.25884FDR:0.53644) or m1_Acsl6(lgFC:-1.3583FDR:0.23564) or m1_Slc27a2(lgFC:0.14166FDR:1)'
'm1_HMR_2152'	'm1_acetyl-[ACP][m1_c] + m1_malonyl-[ACP][m1_c] => m1_[ACP][m1_c] + m1_acetoacetyl-[ACP][m1_c] + m1_CO2[m1_c]'	0	0	0	NaN	NaN	'm1_Fatty acid biosynthesis (even-chain)'	'm1_Fasn(lgFC:-0.026542FDR:1) or m1_Oxsm(lgFC:0.17369FDR:0.73951)'
'm1_HMR_2153'	'm1_acetoacetyl-[ACP][m1_c] + m1_H+[m1_c] + m1_NADPH[m1_c] => m1_(R)-3-hydroxybutanoyl-[ACP][m1_c] + m1_NADP+[m1_c]'	0	0	0	NaN	NaN	'm1_Fatty acid biosynthesis (even-chain)'	'm1_Fasn(lgFC:-0.026542FDR:1)'
'm1_HMR_2154'	'm1_(R)-3-hydroxybutanoyl-[ACP][m1_c] => m1_but-2-enoyl-[ACP][m1_c] + m1_H2O[m1_c]'	0	0	0	NaN	NaN	'm1_Fatty acid biosynthesis (even-chain)'	'm1_Fasn(lgFC:-0.026542FDR:1)'
'm1_HMR_2155'	'm1_but-2-enoyl-[ACP][m1_c] + m1_H+[m1_c] + m1_NADPH[m1_c] => m1_butyryl-[ACP][m1_c] + m1_NADP+[m1_c]'	0	0	0	NaN	NaN	'm1_Fatty acid biosynthesis (even-chain)'	'm1_Fasn(lgFC:-0.026542FDR:1) or m1_Mecr(lgFC:-0.14819FDR:0.92217) or m1_Pecr(lgFC:-0.072944FDR:0.99256)'
'm1_HMR_2156'	'm1_butyryl-[ACP][m1_c] + m1_malonyl-[ACP][m1_c] => m1_[ACP][m1_c] + m1_3-oxohexanoyl-[ACP][m1_c] + m1_CO2[m1_c]'	0	0	0	NaN	NaN	'm1_Fatty acid biosynthesis (even-chain)'	'm1_Fasn(lgFC:-0.026542FDR:1) or m1_Oxsm(lgFC:0.17369FDR:0.73951)'
'm1_HMR_2157'	'm1_3-oxohexanoyl-[ACP][m1_c] + m1_H+[m1_c] + m1_NADPH[m1_c] => m1_D-3-hydroxyhexanoyl-[ACP][m1_c] + m1_NADP+[m1_c]'	0	0	0	NaN	NaN	'm1_Fatty acid biosynthesis (even-chain)'	'm1_Fasn(lgFC:-0.026542FDR:1)'
'm1_HMR_2158'	'm1_D-3-hydroxyhexanoyl-[ACP][m1_c] => m1_(2E)-hexenoyl-[ACP][m1_c] + m1_H2O[m1_c]'	0	0	0	NaN	NaN	'm1_Fatty acid biosynthesis (even-chain)'	'm1_Fasn(lgFC:-0.026542FDR:1)'
'm1_HMR_2159'	'm1_(2E)-hexenoyl-[ACP][m1_c] + m1_H+[m1_c] + m1_NADPH[m1_c] => m1_hexanoyl-[ACP][m1_c] + m1_NADP+[m1_c]'	0	0	0	NaN	NaN	'm1_Fatty acid biosynthesis (even-chain)'	'm1_Fasn(lgFC:-0.026542FDR:1)'
'm1_HMR_2160'	'm1_hexanoyl-[ACP][m1_c] + m1_malonyl-[ACP][m1_c] => m1_[ACP][m1_c] + m1_3-oxooctanoyl-[ACP][m1_c] + m1_CO2[m1_c]'	0	0	0	NaN	NaN	'm1_Fatty acid biosynthesis (even-chain)'	'm1_Fasn(lgFC:-0.026542FDR:1) or m1_Oxsm(lgFC:0.17369FDR:0.73951)'
'm1_HMR_2161'	'm1_3-oxooctanoyl-[ACP][m1_c] + m1_H+[m1_c] + m1_NADPH[m1_c] => m1_(R)-3-hydroxyoctanoyl-[ACP][m1_c] + m1_NADP+[m1_c]'	0	0	0	NaN	NaN	'm1_Fatty acid biosynthesis (even-chain)'	'm1_Fasn(lgFC:-0.026542FDR:1)'
'm1_HMR_2162'	'm1_(R)-3-hydroxyoctanoyl-[ACP][m1_c] => m1_(2E)-octenoyl-[ACP][m1_c] + m1_H2O[m1_c]'	0	0	0	NaN	NaN	'm1_Fatty acid biosynthesis (even-chain)'	'm1_Fasn(lgFC:-0.026542FDR:1)'
'm1_HMR_2163'	'm1_(2E)-octenoyl-[ACP][m1_c] + m1_H+[m1_c] + m1_NADPH[m1_c] => m1_NADP+[m1_c] + m1_octanoyl-[ACP][m1_c]'	0	0	0	NaN	NaN	'm1_Fatty acid biosynthesis (even-chain)'	'm1_Fasn(lgFC:-0.026542FDR:1)'
'm1_HMR_2164'	'm1_malonyl-[ACP][m1_c] + m1_octanoyl-[ACP][m1_c] => m1_[ACP][m1_c] + m1_3-oxodecanoyl-[ACP][m1_c] + m1_CO2[m1_c]'	0	0	0	NaN	NaN	'm1_Fatty acid biosynthesis (even-chain)'	'm1_Fasn(lgFC:-0.026542FDR:1) or m1_Oxsm(lgFC:0.17369FDR:0.73951)'
'm1_HMR_2165'	'm1_3-oxodecanoyl-[ACP][m1_c] + m1_H+[m1_c] + m1_NADPH[m1_c] => m1_(R)-3-hydroxydecanoyl-[ACP][m1_c] + m1_NADP+[m1_c]'	0	0	0	NaN	NaN	'm1_Fatty acid biosynthesis (even-chain)'	'm1_Fasn(lgFC:-0.026542FDR:1)'
'm1_HMR_2166'	'm1_(R)-3-hydroxydecanoyl-[ACP][m1_c] => m1_(2E)-decenoyl-[ACP][m1_c] + m1_H2O[m1_c]'	0	0	0	NaN	NaN	'm1_Fatty acid biosynthesis (even-chain)'	'm1_Fasn(lgFC:-0.026542FDR:1)'
'm1_HMR_2167'	'm1_(2E)-decenoyl-[ACP][m1_c] + m1_H+[m1_c] + m1_NADPH[m1_c] => m1_decanoyl-[ACP][m1_c] + m1_NADP+[m1_c]'	0	0	0	NaN	NaN	'm1_Fatty acid biosynthesis (even-chain)'	'm1_Fasn(lgFC:-0.026542FDR:1)'
'm1_HMR_2168'	'm1_decanoyl-[ACP][m1_c] + m1_malonyl-[ACP][m1_c] => m1_[ACP][m1_c] + m1_3-oxododecanoyl-[ACP][m1_c] + m1_CO2[m1_c]'	0	0	0	NaN	NaN	'm1_Fatty acid biosynthesis (even-chain)'	'm1_Fasn(lgFC:-0.026542FDR:1) or m1_Oxsm(lgFC:0.17369FDR:0.73951)'
[truncated: 18,381 more rows]
