# Supplementary material for: Integrative transcriptomic analysis of tissue-specific metabolic crosstalk after myocardial infarction
Source: eLife journal article supplement (doi:10.7554/elife.66921), 2021-05-10
Supplement: supp [file elife-66921-supp-v1.zip › elife_poa_e66921_Supplementary_file_8.xlsx]

## Sheet: GSE104187
Differential Expression Analysis						Functional Analysis: GO BP					Functional Analysis: KEGG Pathways
Gene name	L2FC	P-VALUE	P-ADJ	DIRECTION		Name	# of Genes	P-Adj	Direction		Name	# of Genes	P-Adj	Direction
Chil3	5.91392	4.29789e-64	6.83321e-60	UP		positive regulation of acute inflammatory response (GO:0002675)	15	0	UP		Citrate cycle (TCA cycle)	32	0	DOWN
Serpine1	5.01302	1.36102e-47	1.08194e-43	UP		cellular response to cytokine stimulus (GO:0071345)	406	0	UP		Valine, leucine and isoleucine degradation	54	0	DOWN
Arg1	6.60757	1.10104e-40	5.83512e-37	UP		mitochondrial respiratory chain complex I assembly (GO:0032981)	62	0	DOWN		Alzheimer disease	165	0	DOWN
Tnc	4.32022	3.73419e-39	1.48425e-35	UP		protein ubiquitination (GO:0016567)	482	0	DOWN		Olfactory transduction	1104	0	UP
Srgn	3.90005	1.80613e-38	5.74312e-35	UP		neutrophil chemotaxis (GO:0030593)	38	0	UP		Thermogenesis	214	0	DOWN
Il6	7.98767	1.8485e-37	4.89823e-34	UP		translational elongation (GO:0006414)	102	0	DOWN		Huntington disease	183	0	DOWN
Angptl4	4.60098	1.46257e-34	3.32192e-31	UP		translational termination (GO:0006415)	95	0	DOWN		Non-alcoholic fatty liver disease (NAFLD)	143	0	DOWN
Ptgs2	5.75758	8.13481e-34	1.61669e-30	UP		mitochondrial translational termination (GO:0070126)	88	0	DOWN		Cytokine-cytokine receptor interaction	279	0	UP
Prg4	4.42229	1.44065e-33	2.54498e-30	UP		response to lipopolysaccharide (GO:0032496)	136	0	UP		Ribosome	129	0	DOWN
Slc7a11	5.63711	1.52526e-31	2.42502e-28	UP		mitochondrial transport (GO:0006839)	127	0	DOWN		Oxidative phosphorylation	118	0	DOWN
Asb2	-3.64373	3.0176e-31	4.36153e-28	DOWN		cellular respiration (GO:0045333)	56	0	DOWN		Parkinson disease	127	0	DOWN
Ccr1	3.90987	6.95995e-30	9.22135e-27	UP		mitochondrial respiratory chain complex assembly (GO:0033108)	95	0	DOWN		IL-17 signaling pathway	87	0	UP
Cd177	5.71539	1.84361e-28	2.25473e-25	UP		positive regulation of leukocyte chemotaxis (GO:0002690)	52	0	UP		Propanoate metabolism	30	0	DOWN
Hmox1	3.79275	2.56191e-28	2.90941e-25	UP		mitochondrial respiratory chain complex I biogenesis (GO:0097031)	62	0	DOWN		Peroxisome	83	3.0582e-14	DOWN
Cxcl1	5.84276	1.40532e-27	1.48955e-24	UP		mitochondrial ATP synthesis coupled electron transport (GO:0042775)	82	0	DOWN		TNF signaling pathway	109	1.5138e-13	UP
Cxcl5	5.90903	1.73236e-27	1.72142e-24	UP		mitochondrial translation (GO:0032543)	106	0	DOWN		Hematopoietic cell lineage	90	3.6331e-13	UP
AA467197	6.28015	4.9934e-27	4.67e-24	UP		fatty acid catabolic process (GO:0009062)	60	0	DOWN		Cardiac muscle contraction	74	5.8309e-13	DOWN
Usp53	3.38101	2.12427e-26	1.78743e-23	UP		fatty acid beta-oxidation (GO:0006635)	49	0	DOWN		Pyruvate metabolism	38	5.8378e-12	DOWN
Cxcl2	8.94019	2.13606e-26	1.78743e-23	UP		cytokine-mediated signaling pathway (GO:0019221)	552	0	UP		Lysosome	124	1.5662e-11	DOWN
Slfn1	4.42853	2.26126e-25	1.79759e-22	UP		neutrophil migration (GO:1990266)	43	0	UP		Neuroactive ligand-receptor interaction	344	6.225e-11	UP
Il1rn	5.23257	9.03112e-25	6.83742e-22	UP		mitochondrial gene expression (GO:0140053)	45	0	DOWN		Retrograde endocannabinoid signaling	138	7.52e-10	DOWN
Lcn2	3.76492	1.03175e-24	7.4563e-22	UP		mitochondrial translational elongation (GO:0070125)	87	0	DOWN		Systemic lupus erythematosus	135	1.3567e-09	DOWN
Il18rap	5.44035	1.0891e-24	7.47843e-22	UP		chemokine-mediated signaling pathway (GO:0070098)	35	0	UP		Malaria	47	1.1469e-08	UP
Cd44	3.2122	1.12889e-24	7.47843e-22	UP		response to molecule of bacterial origin (GO:0002237)	86	0	UP		Alcoholism	192	6.8094e-08	DOWN
Slfn4	4.32029	1.54452e-24	9.82254e-22	UP		translation (GO:0006412)	222	0	DOWN		NF-kappa B signaling pathway	95	1.6673e-07	UP
Cxcr2	3.60288	2.13296e-24	1.30431e-21	UP		protein targeting to mitochondrion (GO:0006626)	50	0	DOWN		Chemokine signaling pathway	185	1.6789e-07	UP
Il1b	4.67657	3.61234e-24	2.12713e-21	UP		mitochondrion organization (GO:0007005)	154	0	DOWN		Cell adhesion molecules (CAMs)	158	2.0225e-07	UP
Fhl1	3.08596	4.37646e-24	2.48505e-21	UP		positive regulation of leukocyte migration (GO:0002687)	28	0	UP		Leishmaniasis	65	2.0225e-07	UP
Cxcl3	9.74633	6.47797e-24	3.55149e-21	UP		inflammatory response (GO:0006954)	211	0	UP		Insulin signaling pathway	137	3.2431e-07	DOWN
Selp	5.19957	3.43869e-23	1.82239e-20	UP		NADH dehydrogenase complex assembly (GO:0010257)	62	0	DOWN		Adrenergic signaling in cardiomyocytes	145	3.966e-07	DOWN
Trem1	5.44148	9.59136e-23	4.91913e-20	UP		inner mitochondrial membrane organization (GO:0007007)	34	0	DOWN		Salmonella infection	77	1.2239e-06	UP
Rbm3	3.01555	1.31486e-22	6.53281e-20	UP		respiratory electron transport chain (GO:0022904)	91	0	DOWN		Glyoxylate and dicarboxylate metabolism	28	1.9044e-06	DOWN
Adam8	4.44982	1.11447e-21	5.36937e-19	UP		granulocyte chemotaxis (GO:0071621)	40	4.7194e-14	UP		Legionellosis	57	2.7157e-06	UP
Cd24a	3.49976	2.60583e-21	1.21853e-18	UP		cellular amino acid catabolic process (GO:0009063)	23	5.1484e-14	DOWN		Glycolysis / Gluconeogenesis	66	3.1438e-06	DOWN
Inhba	4.40201	3.60933e-21	1.63956e-18	UP		mitochondrial electron transport, NADH to ubiquinone (GO:0006120)	45	1.2311e-13	DOWN		Ubiquitin mediated proteolysis	137	3.2914e-06	DOWN
Mt2	3.66993	5.40878e-21	2.38873e-18	UP		branched-chain amino acid metabolic process (GO:0009081)	22	1.6518e-13	DOWN		Aminoacyl-tRNA biosynthesis	44	3.5833e-06	DOWN
Pgf	3.91748	7.63352e-21	3.28014e-18	UP		protein transmembrane import into intracellular organelle (GO:0044743)	41	2.4918e-13	DOWN		Rheumatoid arthritis	81	5.862e-06	UP
Ccl2	4.19785	1.11648e-20	4.67129e-18	UP		heart contraction (GO:0060047)	43	2.8316e-13	DOWN		Fatty acid degradation	50	8.7872e-06	DOWN
Xkrx	5.15801	1.47677e-20	6.02029e-18	UP		peptide biosynthetic process (GO:0043043)	161	5.6632e-13	DOWN		AMPK signaling pathway	124	1.2989e-05	DOWN
Cd300lf	4.5845	1.5301e-20	6.08176e-18	UP		fatty acid oxidation (GO:0019395)	48	7.6858e-13	DOWN		Autophagy	128	1.9632e-05	DOWN
Thbs1	4.16495	2.8845e-20	1.11855e-17	UP		cristae formation (GO:0042407)	25	2.734e-12	DOWN		Purine metabolism	135	4.9832e-05	DOWN
Il1r2	4.64571	1.01302e-19	3.83478e-17	UP		establishment of protein localization to mitochondrion (GO:0072655)	45	4.0964e-12	DOWN		Toll-like receptor signaling pathway	96	5.3922e-05	UP
Plaur	4.79498	1.7947e-19	6.63581e-17	UP		regulation of autophagy (GO:0010506)	196	5.645e-12	DOWN		Glucagon signaling pathway	101	6.0994e-05	DOWN
Eif4a1	3.3952	2.9022e-19	1.04868e-16	UP		positive regulation of immune response (GO:0050778)	47	8.9741e-12	UP		Glycerophospholipid metabolism	95	6.2391e-05	DOWN
Ankrd1	2.57943	3.63439e-19	1.28407e-16	UP		positive regulation of neutrophil migration (GO:1902624)	21	1.0396e-11	UP		mTOR signaling pathway	154	7.8605e-05	DOWN
Slc16a3	4.30217	9.42026e-19	3.23679e-16	UP		cellular macromolecule biosynthetic process (GO:0034645)	354	1.2866e-11	DOWN		Other glycan degradation	18	0.00010067	DOWN
Cd33	3.11125	9.74623e-19	3.23679e-16	UP		leukocyte aggregation (GO:0070486)	7	1.329e-11	UP		Protein processing in endoplasmic reticulum	161	0.00010651	DOWN
Cd53	2.97164	9.77206e-19	3.23679e-16	UP		regulation of leukocyte chemotaxis (GO:0002688)	23	2.3502e-11	UP		Proteasome	46	0.00011946	DOWN
Samsn1	5.09801	1.09927e-18	3.56679e-16	UP		proteasome-mediated ubiquitin-dependent protein catabolic process (GO:0043161)	284	3.0993e-11	DOWN		Inflammatory bowel disease (IBD)	58	0.00012958	UP
Timp1	3.31323	1.22245e-18	3.88714e-16	UP		cellular protein metabolic process (GO:0044267)	448	3.5145e-11	DOWN		Leukocyte transendothelial migration	113	0.00012958	UP
Egr1	4.73896	1.49264e-18	4.65324e-16	UP		positive regulation of inflammatory response (GO:0050729)	61	5.9564e-11	UP		Osteoclast differentiation	122	0.00012958	UP
Adamts4	4.2013	1.78078e-18	5.44474e-16	UP		post-translational protein modification (GO:0043687)	342	7.346e-11	DOWN		NOD-like receptor signaling pathway	182	0.00012958	UP
Itgam	3.20994	2.81533e-18	8.44546e-16	UP		cellular response to molecule of bacterial origin (GO:0071219)	73	1.0984e-10	UP		Amoebiasis	104	0.00013539	UP
Ero1l	2.8429	4.35973e-18	1.28362e-15	UP		striated muscle contraction (GO:0006941)	59	1.413e-10	DOWN		Cysteine and methionine metabolism	49	0.00030274	DOWN
Zfp729a	2.70009	5.87716e-18	1.68108e-15	UP		positive regulation of mononuclear cell migration (GO:0071677)	17	1.5139e-10	UP		JAK-STAT signaling pathway	162	0.00031653	UP
Plek	2.88435	5.92116e-18	1.68108e-15	UP		positive regulation of neutrophil chemotaxis (GO:0090023)	20	1.5674e-10	UP		Ubiquinone and other terpenoid-quinone biosynthesis	11	0.00032326	DOWN
Cstdc4	5.52683	1.59826e-17	4.45803e-15	UP		positive regulation of granulocyte chemotaxis (GO:0071624)	20	1.5674e-10	UP		Pertussis	75	0.000346	UP
Gm49339	3.82803	4.70682e-17	1.29024e-14	UP		regulation of chemokine biosynthetic process (GO:0045073)	7	1.5674e-10	UP		cGMP-PKG signaling pathway	170	0.00042204	DOWN
Ccl6	2.60381	4.92475e-17	1.32709e-14	UP		branched-chain amino acid catabolic process (GO:0009083)	21	1.584e-10	DOWN		Dilated cardiomyopathy (DCM)	89	0.00052427	DOWN
Lrtm1	-2.47166	5.66185e-17	1.5003e-14	DOWN		Golgi vesicle transport (GO:0048193)	250	1.9139e-10	DOWN		Transcriptional misregulation in cancer	178	0.00053396	UP
Rab44	6.25394	2.33702e-16	6.0912e-14	UP		cellular response to lipopolysaccharide (GO:0071222)	80	2.0826e-10	UP		C-type lectin receptor signaling pathway	110	0.00062644	UP
Rtn4	2.33792	3.70045e-16	9.48928e-14	UP		proteasomal protein catabolic process (GO:0010498)	231	2.0933e-10	DOWN		Fructose and mannose metabolism	35	0.0006909	DOWN
Kcnk3	-2.63044	6.2027e-16	1.56535e-13	DOWN		ATP metabolic process (GO:0046034)	54	2.0933e-10	DOWN		Longevity regulating pathway	102	0.00078472	DOWN
Akap12	2.93342	6.88303e-16	1.7099e-13	UP		regulation of macroautophagy (GO:0016241)	113	5.5161e-10	DOWN		Thyroid hormone signaling pathway	114	0.00083123	DOWN
F10	4.35731	1.18083e-15	2.88832e-13	UP		ubiquitin-dependent protein catabolic process (GO:0006511)	332	6.1396e-10	DOWN		Sulfur metabolism	9	0.00093165	DOWN
Nppb	2.32072	1.43407e-15	3.45459e-13	UP		mitochondrial electron transport, ubiquinol to cytochrome c (GO:0006122)	12	6.2647e-10	DOWN		Selenocompound metabolism	17	0.00095556	DOWN
Mthfd1l	4.01659	2.22177e-15	5.27222e-13	UP		2-oxoglutarate metabolic process (GO:0006103)	17	6.5172e-10	DOWN		Graft-versus-host disease	54	0.0013139	UP
Csf2rb	3.48333	2.29248e-15	5.36001e-13	UP		ER to Golgi vesicle-mediated transport (GO:0006888)	164	7.2819e-10	DOWN		Kaposi sarcoma-associated herpesvirus infection	203	0.0013139	UP
Mtfp1	-2.82257	3.26993e-15	7.53458e-13	DOWN		regulation of cardiac muscle contraction by calcium ion signaling (GO:0010882)	20	7.9733e-10	DOWN		Complement and coagulation cascades	87	0.0015177	UP
Vcan	2.29853	3.87049e-15	8.79099e-13	UP		glucose metabolic process (GO:0006006)	60	7.9733e-10	DOWN		Intestinal immune network for IgA production	41	0.0020028	UP
Ereg	4.71548	6.17985e-15	1.38385e-12	UP		positive regulation of cytokine production (GO:0001819)	201	9.334e-10	UP		Retinol metabolism	89	0.0020256	UP
Fos	4.22407	6.73311e-15	1.4868e-12	UP		regulation of heart contraction (GO:0008016)	92	1.1529e-09	DOWN		Butanoate metabolism	27	0.0024386	DOWN
Ch25h	4.99733	1.03467e-14	2.25345e-12	UP		ubiquinone biosynthetic process (GO:0006744)	15	1.1529e-09	DOWN		Ribosome biogenesis in eukaryotes	78	0.0025506	UP
Fhl2	-2.20684	1.1041e-14	2.37217e-12	DOWN		protein modification by small protein conjugation (GO:0032446)	376	1.1529e-09	DOWN		Herpes simplex virus 1 infection	412	0.0025667	UP
Clec4d	3.44619	1.39232e-14	2.95153e-12	UP		cardiac muscle contraction (GO:0060048)	35	1.4537e-09	DOWN		Insulin resistance	107	0.0026351	DOWN
Lif	5.96252	1.81718e-14	3.80149e-12	UP		cellular protein modification process (GO:0006464)	946	1.6398e-09	DOWN		Tryptophan metabolism	47	0.002963	DOWN
mt-Nd6	2.28376	3.16463e-14	6.53435e-12	UP		regulation of T cell proliferation (GO:0042129)	51	1.7e-09	UP		Oocyte meiosis	114	0.0030986	DOWN
Spp1	3.76725	3.43897e-14	7.00977e-12	UP		quinone biosynthetic process (GO:1901663)	14	2.541e-09	DOWN		Fatty acid elongation	29	0.0032134	DOWN
Mylk3	-2.16895	4.22729e-14	8.50756e-12	DOWN		ubiquinone metabolic process (GO:0006743)	14	2.541e-09	DOWN		Glycine, serine and threonine metabolism	39	0.0039002	DOWN
Clasp1	-2.16007	5.15395e-14	1.02428e-11	DOWN		gene expression (GO:0010467)	395	2.9343e-09	DOWN		Regulation of actin cytoskeleton	216	0.0039456	UP
Gm14548	3.98329	5.40693e-14	1.05941e-11	UP		ATP synthesis coupled proton transport (GO:0015986)	24	3.3116e-09	DOWN		Chagas disease (American trypanosomiasis)	102	0.0045492	UP
Hilpda	3.84148	5.46399e-14	1.05941e-11	UP		positive regulation of cytokine biosynthetic process (GO:0042108)	39	3.3977e-09	UP		MicroRNAs in cancer	142	0.0054914	UP
Pi15	2.59825	6.30456e-14	1.20767e-11	UP		ATP biosynthetic process (GO:0006754)	29	3.7829e-09	DOWN		Tuberculosis	173	0.0054914	UP
Rnd1	3.52944	8.31968e-14	1.55892e-11	UP		positive regulation of myeloid leukocyte mediated immunity (GO:0002888)	8	4.0205e-09	UP		Steroid hormone biosynthesis	87	0.0054914	UP
Hbegf	3.27041	8.3344e-14	1.55892e-11	UP		porphyrin-containing compound biosynthetic process (GO:0006779)	18	5.4776e-09	DOWN		Lysine degradation	58	0.0055961	DOWN
Adamts1	3.18972	1.10102e-13	2.03549e-11	UP		macroautophagy (GO:0016236)	106	5.8393e-09	DOWN		Terpenoid backbone biosynthesis	22	0.0058584	DOWN
Pde4a	-3.27074	1.21437e-13	2.21923e-11	DOWN		purine ribonucleoside monophosphate biosynthetic process (GO:0009168)	37	6.9884e-09	DOWN		Staphylococcus aureus infection	74	0.0060376	UP
Gpr35	3.43778	1.63526e-13	2.95443e-11	UP		positive regulation of chemotaxis (GO:0050921)	39	8.3048e-09	UP		Nicotine addiction	40	0.0061746	UP
Fpr2	4.16359	1.72468e-13	3.08097e-11	UP		atrial cardiac muscle cell action potential (GO:0086014)	12	1.0157e-08	DOWN		Amino sugar and nucleotide sugar metabolism	49	0.0061997	DOWN
Stfa2l1	5.47786	2.1229e-13	3.75022e-11	UP		regulation of cardiac conduction (GO:1903779)	66	1.2818e-08	DOWN		Phagosome	167	0.0074567	UP
Lrrc14b	-3.86902	2.26126e-13	3.95074e-11	DOWN		mitochondrial transmembrane transport (GO:1990542)	32	1.4738e-08	DOWN		N-Glycan biosynthesis	50	0.0094454	DOWN
Nlrp3	4.58752	2.34011e-13	4.04407e-11	UP		purine ribonucleoside triphosphate biosynthetic process (GO:0009206)	25	1.538e-08	DOWN		MAPK signaling pathway	292	0.010812	UP
S100a9	2.92854	2.56436e-13	4.38395e-11	UP		cardiac muscle cell membrane repolarization (GO:0099622)	11	1.5735e-08	DOWN		Alanine, aspartate and glutamate metabolism	35	0.011226	DOWN
Lynx1	-2.62568	2.62943e-13	4.44738e-11	DOWN		positive regulation of fever generation (GO:0031622)	6	1.7066e-08	UP		Progesterone-mediated oocyte maturation	89	0.012609	DOWN
Sbk1	-2.83188	4.22242e-13	7.06655e-11	DOWN		positive regulation of blood coagulation (GO:0030194)	19	1.7863e-08	UP		Adipocytokine signaling pathway	70	0.013083	DOWN
Msr1	2.9491	4.37569e-13	7.24677e-11	UP		peroxisome organization (GO:0007031)	23	1.8623e-08	DOWN		Measles	140	0.014033	UP
Sh2d5	5.4662	7.46318e-13	1.22327e-10	UP		mitochondrial ATP synthesis coupled proton transport (GO:0042776)	19	2.1238e-08	DOWN		Nucleotide excision repair	43	0.014317	DOWN
Plin2	2.17436	8.17875e-13	1.32688e-10	UP		regulation of extrinsic apoptotic signaling pathway via death domain receptors (GO:1902041)	35	2.5727e-08	UP		Hippo signaling pathway	158	0.014373	UP
Retnlg	3.4497	8.86107e-13	1.42305e-10	UP		muscle contraction (GO:0006936)	134	2.6215e-08	DOWN		African trypanosomiasis	36	0.014373	UP
Il1rap	2.83217	1.22586e-12	1.94899e-10	UP		membrane repolarization during cardiac muscle cell action potential (GO:0086013)	15	2.9737e-08	DOWN		Galactose metabolism	32	0.014428	DOWN
Inhbb	3.50519	1.25312e-12	1.97261e-10	UP		positive regulation of chemokine production (GO:0032722)	30	3.9745e-08	UP		Vasopressin-regulated water reabsorption	43	0.015228	DOWN
Grb14	-2.42629	1.39111e-12	2.16835e-10	DOWN		protein import into mitochondrial matrix (GO:0030150)	17	4.324e-08	DOWN		Porphyrin and chlorophyll metabolism	40	0.015543	DOWN
Eef1a2	-2.29118	1.58128e-12	2.44085e-10	DOWN		leukocyte cell-cell adhesion (GO:0007159)	24	4.4328e-08	UP		Mannose type O-glycan biosynthesis	22	0.017297	DOWN
Perm1	-2.35997	1.8722e-12	2.86213e-10	DOWN		regulation of heart rate by cardiac conduction (GO:0086091)	34	4.9147e-08	DOWN		Glutathione metabolism	63	0.017598	DOWN
Ankrd2	4.85677	1.98336e-12	3.00318e-10	UP		regulation of release of sequestered calcium ion into cytosol by sarcoplasmic reticulum (GO:0010880)	22	5.6509e-08	DOWN		Human cytomegalovirus infection	244	0.018986	UP
Eif1a	2.27868	2.10402e-12	3.15583e-10	UP		respiratory chain complex IV assembly (GO:0008535)	24	5.6509e-08	DOWN		Influenza A	163	0.018986	UP
Zfp52	2.64351	2.12703e-12	3.16053e-10	UP		positive regulation of monocyte chemotaxis (GO:0090026)	15	5.9049e-08	UP		Glycosylphosphatidylinositol (GPI)-anchor biosynthesis	25	0.019285	DOWN
Lpin1	-2.33286	2.2414e-12	3.29963e-10	DOWN		heme biosynthetic process (GO:0006783)	16	5.9135e-08	DOWN		Necroptosis	170	0.019366	DOWN
Tlr13	2.69874	2.41398e-12	3.52108e-10	UP		fatty acid beta-oxidation using acyl-CoA dehydrogenase (GO:0033539)	15	6.9382e-08	DOWN		Mismatch repair	22	0.020179	DOWN
Igfbp3	3.20681	2.45341e-12	3.54607e-10	UP		hexose metabolic process (GO:0019318)	44	7.4019e-08	DOWN		Starch and sucrose metabolism	33	0.020179	DOWN
Col1a1	-2.39539	3.0779e-12	4.40861e-10	DOWN		protein transport (GO:0015031)	291	8.6339e-08	DOWN		Glycosaminoglycan degradation	21	0.0212	DOWN
Myh7b	-2.84254	3.84087e-12	5.45232e-10	DOWN		regulation of transcription from RNA polymerase II promoter in response to oxidative stress (GO:0043619)	8	1.2245e-07	UP		Viral carcinogenesis	219	0.021414	DOWN
Josd2	-3.06586	4.23543e-12	5.95922e-10	DOWN		negative regulation of T cell activation (GO:0050868)	30	1.2245e-07	UP		Glycerolipid metabolism	61	0.021955	DOWN
C3	-2.1572	4.37275e-12	6.09845e-10	DOWN		acute-phase response (GO:0006953)	15	1.2245e-07	UP		Proximal tubule bicarbonate reclamation	22	0.022595	DOWN
Htra3	-2.75288	4.49508e-12	6.21455e-10	DOWN		aerobic respiration (GO:0009060)	27	1.4137e-07	DOWN		ABC transporters	48	0.022595	DOWN
Pdpn	2.78521	4.86425e-12	6.63474e-10	UP		leukocyte adhesion to vascular endothelial cell (GO:0061756)	16	1.6016e-07	UP		Cytosolic DNA-sensing pathway	60	0.023792	UP
Fpr1	3.96941	4.88247e-12	6.63474e-10	UP		positive regulation of T cell activation (GO:0050870)	58	1.6016e-07	UP		Synthesis and degradation of ketone bodies	11	0.031606	DOWN
Kcnj3	-2.40284	5.13416e-12	6.91763e-10	DOWN		leukocyte tethering or rolling (GO:0050901)	16	1.6016e-07	UP		Base excision repair	33	0.031606	DOWN
Asb10	-2.65949	6.19647e-12	8.27879e-10	DOWN		mitochondrial respiratory chain complex IV biogenesis (GO:0097034)	20	1.7789e-07	DOWN		TGF-beta signaling pathway	90	0.033176	UP
Basp1	3.89571	6.58773e-12	8.72819e-10	UP		protein polyubiquitination (GO:0000209)	268	1.8166e-07	DOWN		Mitophagy	62	0.035626	DOWN
Fitm2	-2.10586	7.23085e-12	9.5011e-10	DOWN		protein targeting (GO:0006605)	125	1.9038e-07	DOWN		Sulfur relay system	8	0.044998	DOWN
Cytip	3.18248	8.07063e-12	1.05176e-09	UP		regulation of inflammatory response (GO:0050727)	142	2.1097e-07	UP		Regulation of lipolysis in adipocytes	56	0.044998	DOWN
Tbc1d4	-2.24184	8.62759e-12	1.1152e-09	DOWN		regulation of neutrophil chemotaxis (GO:0090022)	25	2.1097e-07	UP		Arrhythmogenic right ventricular cardiomyopathy (ARVC)	72	0.049082	DOWN
mt-Cytb	2.12559	1.30067e-11	1.66769e-09	UP		regulation of immune response (GO:0050776)	133	2.6801e-07	UP
A530016L24Rik	-3.15556	1.34983e-11	1.71687e-09	DOWN		pyruvate metabolic process (GO:0006090)	45	2.8937e-07	DOWN
Shld1	-3.35048	1.36457e-11	1.72186e-09	DOWN		negative regulation of extrinsic apoptotic signaling pathway (GO:2001237)	71	2.9507e-07	UP
Mmp15	-2.69008	1.7693e-11	2.21497e-09	DOWN		regulation of monocyte chemotaxis (GO:0090025)	19	3.6908e-07	UP
Fgl2	2.14043	1.88262e-11	2.33842e-09	UP		response to lipid (GO:0033993)	127	3.6993e-07	UP
Lmod3	-2.58705	1.99494e-11	2.45873e-09	DOWN		monocarboxylic acid metabolic process (GO:0032787)	96	5.2994e-07	DOWN
Ednrb	2.07409	2.35797e-11	2.8838e-09	UP		mitochondrial electron transport, cytochrome c to oxygen (GO:0006123)	21	5.4507e-07	DOWN
Lipg	5.00569	2.41258e-11	2.92807e-09	UP		fibrinolysis (GO:0042730)	16	6.3054e-07	UP
Plk2	2.43881	2.56273e-11	3.08674e-09	UP		regulation of natural killer cell chemotaxis (GO:2000501)	7	7.7078e-07	UP
Klf6	2.69672	2.67114e-11	3.19312e-09	UP		regulation of cardiac muscle contraction by regulation of the release of sequestered calcium ion (GO:0010881)	16	8.581e-07	DOWN
Plscr1	2.89468	2.76447e-11	3.28002e-09	UP		cellular defense response (GO:0006968)	42	8.8328e-07	UP
Fndc5	-2.20722	2.9934e-11	3.52534e-09	DOWN		organelle assembly (GO:0070925)	314	8.8656e-07	DOWN
Frmd5	-2.05155	3.1016e-11	3.6259e-09	DOWN		iron-sulfur cluster assembly (GO:0016226)	17	9.3589e-07	DOWN
Sphk1	4.22185	3.39965e-11	3.94533e-09	UP		carbohydrate catabolic process (GO:0016052)	32	1.0126e-06	DOWN
mt-Nd4l	2.2052	3.51494e-11	4.04957e-09	UP		regulation of cell proliferation (GO:0042127)	688	1.0597e-06	UP
mt-Nd4	2.1887	3.57219e-11	4.08592e-09	UP		mitochondrial respiratory chain complex IV assembly (GO:0033617)	19	1.3669e-06	DOWN
Osm	5.74872	4.07579e-11	4.62864e-09	UP		negative regulation of extrinsic apoptotic signaling pathway via death domain receptors (GO:1902042)	28	1.4191e-06	UP
Dhrs3	-2.34582	4.28062e-11	4.82678e-09	DOWN		gluconeogenesis (GO:0006094)	38	1.4324e-06	DOWN
Xirp2	2.12771	4.71346e-11	5.27741e-09	UP		positive regulation of ubiquitin protein ligase activity (GO:1904668)	81	1.4324e-06	DOWN
Trmt2b	-2.98447	5.03493e-11	5.59793e-09	DOWN		cardiac muscle cell action potential (GO:0086001)	29	1.853e-06	DOWN
Tes	2.85744	5.52554e-11	6.10073e-09	UP		relaxation of muscle (GO:0090075)	11	1.8804e-06	DOWN
Ier3	2.91238	6.68511e-11	7.33011e-09	UP		energy coupled proton transport, down electrochemical gradient (GO:0015985)	12	1.8808e-06	DOWN
Msn	1.82773	6.76648e-11	7.36851e-09	UP		negative regulation of bone mineralization (GO:0030502)	10	2.057e-06	UP
Sacs	2.0274	6.93984e-11	7.50588e-09	UP		regulation of ATPase activity (GO:0043462)	40	2.11e-06	DOWN
Anxa2	1.89297	7.17384e-11	7.70655e-09	UP		membrane depolarization during cardiac muscle cell action potential (GO:0086012)	17	2.1745e-06	DOWN
Ces1d	-2.22452	7.2778e-11	7.76576e-09	DOWN		mitochondrial membrane organization (GO:0007006)	17	2.2717e-06	DOWN
Hjv	-2.57932	7.74837e-11	8.21275e-09	DOWN		hexose biosynthetic process (GO:0019319)	40	2.6212e-06	DOWN
Fcgrt	-2.34655	7.84049e-11	8.25536e-09	DOWN		cardiac myofibril assembly (GO:0055003)	16	2.65e-06	DOWN
Jaml	3.53687	7.942e-11	8.30723e-09	UP		positive regulation of defense response (GO:0031349)	60	2.8195e-06	UP
Tuba8	-2.24576	8.4126e-11	8.74195e-09	DOWN		oxidative phosphorylation (GO:0006119)	11	2.9597e-06	DOWN
Col1a2	-2.0631	8.50243e-11	8.77793e-09	DOWN		regulation of cardiac muscle cell contraction (GO:0086004)	26	3.6754e-06	DOWN
Tarm1	4.66483	9.00512e-11	9.23693e-09	UP		transcription from mitochondrial promoter (GO:0006390)	11	3.7125e-06	DOWN
Mtr	-2.02969	9.57266e-11	9.75614e-09	DOWN		neutrophil mediated immunity (GO:0002446)	432	4.0131e-06	UP
Uck2	2.50347	9.68041e-11	9.80312e-09	UP		mitochondrial RNA metabolic process (GO:0000959)	19	4.024e-06	DOWN
Sele	3.95365	1.02969e-10	1.03615e-08	UP		anaphase-promoting complex-dependent catabolic process (GO:0031145)	79	4.0571e-06	DOWN
Col3a1	-1.8788	1.20372e-10	1.20364e-08	DOWN		granulocyte migration (GO:0097530)	6	4.1118e-06	UP
Ppm1k	-1.99169	1.67979e-10	1.66918e-08	DOWN		negative regulation of lymphocyte proliferation (GO:0050672)	25	4.2668e-06	UP
mt-Atp8	2.29526	1.71779e-10	1.69634e-08	UP		relaxation of cardiac muscle (GO:0055119)	11	4.4664e-06	DOWN
Sla	2.73358	1.75651e-10	1.72387e-08	UP		dendritic cell chemotaxis (GO:0002407)	15	4.555e-06	UP
Fn1	2.07172	1.85554e-10	1.80989e-08	UP		regulation of cardiac muscle cell action potential (GO:0098901)	24	4.9778e-06	DOWN
Btg1	2.37735	1.99314e-10	1.93225e-08	UP		regulation of fatty acid oxidation (GO:0046320)	13	5.0642e-06	DOWN
Hist1h4h	-2.33253	2.06049e-10	1.98544e-08	DOWN		cellular amide metabolic process (GO:0043603)	55	5.1031e-06	DOWN
Anks1	-2.21871	2.23841e-10	2.14388e-08	DOWN		cell-cell adhesion via plasma-membrane adhesion molecules (GO:0098742)	138	5.137e-06	UP
Rxrg	-2.30038	2.26452e-10	2.1559e-08	DOWN		lysosomal transport (GO:0007041)	69	5.4153e-06	DOWN
mt-Atp6	2.01722	2.54068e-10	2.40442e-08	UP		negative regulation of bone resorption (GO:0045779)	6	5.574e-06	UP
Ccl3	5.40173	2.59375e-10	2.44012e-08	UP		positive regulation of leukocyte degranulation (GO:0043302)	10	5.6176e-06	UP
Atp8b4	3.02745	3.21391e-10	3.00576e-08	UP		cofactor biosynthetic process (GO:0051188)	30	6.2871e-06	DOWN
Slc41a3	-2.68728	3.25246e-10	3.02402e-08	DOWN		negative regulation of fibrinolysis (GO:0051918)	9	6.3383e-06	UP
Bcl2a1b	3.91184	3.60019e-10	3.32787e-08	UP		regulation of TOR signaling (GO:0032006)	66	7.3219e-06	DOWN
Olr1	4.34714	3.98416e-10	3.66151e-08	UP		actomyosin structure organization (GO:0031032)	70	7.4021e-06	DOWN
Nceh1	-1.8203	4.06115e-10	3.71082e-08	DOWN		positive regulation of tumor necrosis factor biosynthetic process (GO:0042535)	7	7.4475e-06	UP
Rragd	-2.00688	4.86767e-10	4.42235e-08	DOWN		glycolytic process (GO:0006096)	22	8.0951e-06	DOWN
Efnb3	-2.87207	4.98513e-10	4.50333e-08	DOWN		potassium ion import across plasma membrane (GO:1990573)	9	8.1542e-06	DOWN
mt-Nd2	2.06417	5.24448e-10	4.71084e-08	UP		cardiac muscle cell development (GO:0055013)	26	9.2762e-06	DOWN
Abca13	4.30748	5.27883e-10	4.71507e-08	UP		nucleotide-excision repair (GO:0006289)	102	9.2762e-06	DOWN
Slc7a2	2.78296	5.85094e-10	5.19687e-08	UP		fatty acid beta-oxidation using acyl-CoA oxidase (GO:0033540)	14	9.845e-06	DOWN
Slfn2	2.24679	6.49223e-10	5.73444e-08	UP		positive regulation of protein ubiquitination involved in ubiquitin-dependent protein catabolic process (GO:2000060)	84	9.845e-06	DOWN
Fhod3	-2.06445	6.77273e-10	5.92028e-08	DOWN		endosomal transport (GO:0016197)	205	1.0273e-05	DOWN
Ctla2a	2.47136	6.7771e-10	5.92028e-08	UP		neutrophil extravasation (GO:0072672)	6	1.1332e-05	UP
Nop58	2.15201	8.38506e-10	7.27575e-08	UP		lipopolysaccharide-mediated signaling pathway (GO:0031663)	16	1.1473e-05	UP
Rap1gap2	-2.18635	8.42027e-10	7.27575e-08	DOWN		peptide metabolic process (GO:0006518)	94	1.2522e-05	DOWN
Tgm1	4.5425	8.5877e-10	7.38031e-08	UP		positive regulation of heterotypic cell-cell adhesion (GO:0034116)	11	1.2706e-05	UP
Klhl31	-1.82553	8.85363e-10	7.56795e-08	DOWN		ERAD pathway (GO:0036503)	75	1.3262e-05	DOWN
S100a8	2.6554	9.03222e-10	7.67932e-08	UP		negative regulation of hormone secretion (GO:0046888)	13	1.4765e-05	UP
Zfp697	2.62939	9.34133e-10	7.89988e-08	UP		lymphocyte chemotaxis (GO:0048247)	30	1.5009e-05	UP
Gcnt1	2.47103	1.00351e-09	8.44169e-08	UP		retrograde vesicle-mediated transport, Golgi to ER (GO:0006890)	76	1.5019e-05	DOWN
Nmrk2	2.18122	1.04332e-09	8.73043e-08	UP		positive regulation of fatty acid oxidation (GO:0046321)	11	1.6881e-05	DOWN
Acacb	-2.0662	1.07673e-09	8.94552e-08	DOWN		regulation of MAPK cascade (GO:0043408)	191	1.7826e-05	UP
Mcrip2	-2.49475	1.08028e-09	8.94552e-08	DOWN		monocyte chemotaxis (GO:0002548)	26	1.7826e-05	UP
Mcemp1	3.77868	1.08767e-09	8.95993e-08	UP		negative regulation of immune response (GO:0050777)	34	1.8134e-05	UP
Clec5a	3.50894	1.09329e-09	8.95993e-08	UP		neutrophil activation involved in immune response (GO:0002283)	428	1.8134e-05	UP
Ppargc1a	-2.13126	1.12511e-09	9.17343e-08	DOWN		membrane repolarization (GO:0086009)	12	1.8529e-05	DOWN
mt-Nd5	2.00398	1.1449e-09	9.2871e-08	UP		regulation of B cell activation (GO:0050864)	18	1.9688e-05	UP
Ngp	5.23785	1.2058e-09	9.73148e-08	UP		organelle fission (GO:0048285)	24	1.9905e-05	DOWN
Ccl4	6.72473	1.27635e-09	1.02488e-07	UP		regulation of chemokine production (GO:0032642)	17	2.039e-05	UP
Fmnl2	2.52809	1.31421e-09	1.04998e-07	UP		regulation of sequestering of triglyceride (GO:0010889)	12	2.0594e-05	DOWN
Havcr2	3.95605	1.35153e-09	1.0744e-07	UP		neutrophil degranulation (GO:0043312)	425	2.3396e-05	UP
Apold1	2.86796	1.44749e-09	1.14496e-07	UP		cilium assembly (GO:0060271)	261	2.3561e-05	DOWN
Strip2	-1.87737	1.52421e-09	1.19967e-07	DOWN		protein stabilization (GO:0050821)	145	2.3561e-05	DOWN
Adam12	3.19394	1.54069e-09	1.20667e-07	UP		myofibril assembly (GO:0030239)	46	2.4187e-05	DOWN
Ccr2	2.80181	1.5861e-09	1.23615e-07	UP		mitochondrial calcium ion transmembrane transport (GO:0006851)	21	2.524e-05	DOWN
Narf	-1.92844	1.63347e-09	1.26685e-07	DOWN		ATP generation from ADP (GO:0006757)	23	2.6849e-05	DOWN
Prxl2b	-2.30878	1.65751e-09	1.27926e-07	DOWN		cellular protein localization (GO:0034613)	280	2.7305e-05	DOWN
C1qa	-2.04455	1.75314e-09	1.34653e-07	DOWN		cardiac muscle cell action potential involved in contraction (GO:0086002)	27	2.756e-05	DOWN
Rras2	1.80464	2.09464e-09	1.60109e-07	UP		long-chain fatty acid transport (GO:0015909)	23	2.756e-05	DOWN
Pygl	2.37814	2.19348e-09	1.66862e-07	UP		regulation of heterotypic cell-cell adhesion (GO:0034114)	19	2.9251e-05	UP
Gdf15	4.24837	2.63647e-09	1.99606e-07	UP		fatty acid metabolic process (GO:0006631)	94	3.0606e-05	DOWN
Akap1	-1.84566	2.81029e-09	2.11757e-07	DOWN		acyl-CoA metabolic process (GO:0006637)	36	3.2454e-05	DOWN
Btg2	2.32145	2.89855e-09	2.17377e-07	UP		regulation of osteoclast differentiation (GO:0045670)	31	3.448e-05	UP
Mrpl34	-2.45307	3.17397e-09	2.36915e-07	DOWN		defense response to bacterium (GO:0042742)	103	3.448e-05	UP
Csf3r	2.45012	3.41378e-09	2.53625e-07	UP		positive regulation of lymphocyte activation (GO:0051251)	24	3.448e-05	UP
Tubb6	2.08791	3.47858e-09	2.57237e-07	UP		tRNA aminoacylation for protein translation (GO:0006418)	46	3.4579e-05	DOWN
Galm	-3.06423	3.54779e-09	2.6114e-07	DOWN		creatine metabolic process (GO:0006600)	9	3.4766e-05	DOWN
Ptpn12	2.25269	3.5701e-09	2.61571e-07	UP		positive regulation of interleukin-8 production (GO:0032757)	40	3.9372e-05	UP
Gm15737	3.09714	3.67064e-09	2.66974e-07	UP		nicotinamide nucleotide metabolic process (GO:0046496)	42	4.6094e-05	DOWN
Cass4	3.53088	3.67741e-09	2.66974e-07	UP		macrophage migration (GO:1905517)	9	4.6546e-05	UP
Map1b	2.06871	4.02548e-09	2.90914e-07	UP		macrophage chemotaxis (GO:0048246)	9	4.6546e-05	UP
Fbxl22	-2.45042	4.06976e-09	2.92783e-07	DOWN		organonitrogen compound catabolic process (GO:1901565)	47	4.7617e-05	DOWN
Sirpb1c	4.23564	4.09485e-09	2.93261e-07	UP		positive regulation of response to external stimulus (GO:0032103)	75	4.7841e-05	UP
Dhrs7c	-2.3365	4.34425e-09	3.09728e-07	DOWN		regulation of hormone secretion (GO:0046883)	12	5.1863e-05	UP
Asb15	-2.24762	4.65435e-09	3.30355e-07	DOWN		positive regulation of cell proliferation (GO:0008284)	395	5.2345e-05	UP
A730049H05Rik	3.85399	4.70771e-09	3.32657e-07	UP		purine ribonucleotide biosynthetic process (GO:0009152)	71	5.3683e-05	DOWN
Mov10l1	-2.20015	5.01818e-09	3.53027e-07	DOWN		ATP synthesis coupled electron transport (GO:0042773)	9	5.6285e-05	DOWN
Ptgds	-1.86323	5.28177e-09	3.69933e-07	DOWN		regulation of mitochondrion organization (GO:0010821)	47	6.5376e-05	DOWN
Coq8a	-1.96289	5.3067e-09	3.70049e-07	DOWN		regulation of striated muscle contraction (GO:0006942)	28	6.7267e-05	DOWN
Unc45b	-2.0428	5.48152e-09	3.80571e-07	DOWN		cellular response to lipid (GO:0071396)	162	7.1595e-05	UP
Myc	3.53502	5.74664e-09	3.97242e-07	UP		positive regulation of interleukin-1 beta production (GO:0032731)	25	7.1595e-05	UP
Slc2a1	2.90386	5.86962e-09	4.03987e-07	UP		positive regulation of leukocyte cell-cell adhesion (GO:1903039)	17	7.326e-05	UP
Kcnj11	-2.33061	5.96535e-09	4.08806e-07	DOWN		regulation of tumor necrosis factor biosynthetic process (GO:0042534)	9	7.6444e-05	UP
Sprr1a	4.48604	6.0949e-09	4.15661e-07	UP		glycogen metabolic process (GO:0005977)	31	8.0928e-05	DOWN
Ak1	-2.03022	6.11765e-09	4.15661e-07	DOWN		eosinophil chemotaxis (GO:0048245)	13	8.3648e-05	UP
Fgr	3.63544	6.30575e-09	4.26617e-07	UP		eosinophil migration (GO:0072677)	13	8.3648e-05	UP
Coq9	-2.18611	6.51195e-09	4.38701e-07	DOWN		import across plasma membrane (GO:0098739)	11	8.387e-05	DOWN
Eno3	-1.91587	6.59683e-09	4.42544e-07	DOWN		regulation of ubiquitin-protein ligase activity involved in mitotic cell cycle (GO:0051439)	72	8.5733e-05	DOWN
Emp1	1.91661	6.62948e-09	4.42866e-07	UP		cytosolic calcium ion transport (GO:0060401)	22	8.5733e-05	DOWN
Rtn4ip1	-2.08185	6.81409e-09	4.53293e-07	DOWN		regulation of mitotic cell cycle phase transition (GO:1901990)	179	8.6643e-05	DOWN
Gm14288	-9.30741	6.92928e-09	4.59036e-07	DOWN		establishment of protein localization to mitochondrial membrane (GO:0090151)	12	8.6643e-05	DOWN
Ccl7	3.22342	7.09789e-09	4.68254e-07	UP		metallo-sulfur cluster assembly (GO:0031163)	13	8.8409e-05	DOWN
Cd14	2.65751	7.39382e-09	4.85762e-07	UP		ornithine metabolic process (GO:0006591)	9	0.00010276	UP
Lox	2.28855	7.46511e-09	4.88427e-07	UP		regulation of bone resorption (GO:0045124)	21	0.00010383	UP
Tmem94	-2.28044	7.61078e-09	4.95917e-07	DOWN		skeletal muscle thin filament assembly (GO:0030240)	9	0.00010399	DOWN
Alkbh7	-2.5736	8.08549e-09	5.24699e-07	DOWN		regulation of cardiac muscle contraction (GO:0055117)	35	0.00010399	DOWN
Crip2	-1.98966	8.18214e-09	5.28812e-07	DOWN		regulation of vascular endothelial growth factor production (GO:0010574)	26	0.00010474	UP
Wnk2	-2.53765	8.50666e-09	5.47133e-07	DOWN		positive regulation of cell-cell adhesion (GO:0022409)	31	0.00010474	UP
Fosl1	9.02262	8.53444e-09	5.47133e-07	UP		positive regulation of ubiquitin-protein ligase activity involved in regulation of mitotic cell cycle transition (GO:0051437)	75	0.00011573	DOWN
Nfat5	2.23445	8.58203e-09	5.47975e-07	UP		negative regulation of ATPase activity (GO:0032780)	12	0.00011573	DOWN
Tnfrsf26	3.56627	9.00708e-09	5.72814e-07	UP		positive regulation of angiogenesis (GO:0045766)	98	0.00011623	UP
Tuba4a	-1.95	9.54369e-09	6.04522e-07	DOWN		negative regulation of leukocyte degranulation (GO:0043301)	6	0.00012344	UP
Klhl41	1.99136	9.85928e-09	6.20438e-07	UP		positive regulation of MAPK cascade (GO:0043410)	258	0.00012424	UP
Ctnnal1	-2.3372	9.89548e-09	6.20438e-07	DOWN		regulation of interferon-gamma production (GO:0032649)	39	0.00012424	UP
Ccn2	2.29442	9.91202e-09	6.20438e-07	UP		microtubule polymerization (GO:0046785)	26	0.00012637	DOWN
mt-Nd1	1.74647	1.13557e-08	7.08018e-07	UP		phosphate-containing compound metabolic process (GO:0006796)	175	0.00012755	DOWN
Fcgr2b	1.98266	1.14488e-08	7.11031e-07	UP		phospholipid metabolic process (GO:0006644)	66	0.0001325	DOWN
Osmr	1.82567	1.1524e-08	7.12918e-07	UP		Wnt signaling pathway, planar cell polarity pathway (GO:0060071)	87	0.00013252	DOWN
Gcnt2	2.22579	1.29815e-08	7.99972e-07	UP		coenzyme biosynthetic process (GO:0009108)	28	0.00013846	DOWN
Fastk	-1.88278	1.32094e-08	8.10873e-07	DOWN		regulation of acyl-CoA biosynthetic process (GO:0050812)	13	0.00014772	DOWN
Tango2	-2.11273	1.32948e-08	8.12979e-07	DOWN		regulation of acetyl-CoA biosynthetic process from pyruvate (GO:0010510)	13	0.00014772	DOWN
Nfkbiz	2.80919	1.47089e-08	8.96004e-07	UP		mitochondrial respiratory chain complex III assembly (GO:0034551)	9	0.00014772	DOWN
Klf15	-2.36089	1.52559e-08	9.25776e-07	DOWN		respiratory chain complex III assembly (GO:0017062)	9	0.00014772	DOWN
Epha4	-2.78591	1.55915e-08	9.39215e-07	DOWN		positive regulation of T cell proliferation (GO:0042102)	49	0.00015089	UP
Pln	-1.61327	1.55955e-08	9.39215e-07	DOWN		transcription-coupled nucleotide-excision repair (GO:0006283)	71	0.00015384	DOWN
Mavs	-2.03658	1.6368e-08	9.82017e-07	DOWN		mitochondrial fusion (GO:0008053)	15	0.00015411	DOWN
Nek6	2.5161	1.66172e-08	9.9322e-07	UP		response to cytokine (GO:0034097)	133	0.00015547	UP
Cd80	2.91387	1.67868e-08	9.99602e-07	UP		dicarboxylic acid metabolic process (GO:0043648)	57	0.00015577	DOWN
Tm4sf1	1.81009	1.69263e-08	1.00415e-06	UP		regulation of fibrinolysis (GO:0051917)	13	0.00015664	UP
Yipf7	-1.91199	1.70631e-08	1.0085e-06	DOWN		negative regulation of ubiquitin-protein ligase activity involved in mitotic cell cycle (GO:0051436)	71	0.00016277	DOWN
Ank1	-2.10978	1.73941e-08	1.02425e-06	DOWN		membrane repolarization during action potential (GO:0086011)	10	0.00016957	DOWN
Csf2rb2	2.67964	1.76614e-08	1.03522e-06	UP		positive regulation of T cell cytokine production (GO:0002726)	12	0.00017181	UP
Olfr1033	2.11574	1.77106e-08	1.03522e-06	UP		mitochondrial respiratory chain complex III biogenesis (GO:0097033)	10	0.00018466	DOWN
Itga5	2.12896	1.78586e-08	1.03724e-06	UP		AV node cell action potential (GO:0086016)	7	0.00018759	DOWN
Pfkfb3	2.76268	1.78755e-08	1.03724e-06	UP		Golgi organization (GO:0007030)	98	0.00019924	DOWN
Rai14	2.34562	1.90095e-08	1.09902e-06	UP		SCF-dependent proteasomal ubiquitin-dependent protein catabolic process (GO:0031146)	71	0.00020815	DOWN
Lyst	1.89728	1.91834e-08	1.10506e-06	UP		non-canonical Wnt signaling pathway (GO:0035567)	126	0.00021133	DOWN
Cacna1c	-1.74716	2.01429e-08	1.15614e-06	DOWN		positive regulation of interleukin-2 production (GO:0032743)	20	0.00021161	UP
Rilpl1	-2.06805	2.02522e-08	1.15823e-06	DOWN		heart development (GO:0007507)	143	0.00022512	DOWN
Ndufs7	-2.1224	2.10145e-08	1.19752e-06	DOWN		positive regulation of transforming growth factor beta production (GO:0071636)	8	0.00023719	UP
Sell	2.44476	2.23571e-08	1.26948e-06	UP		biotin metabolic process (GO:0006768)	10	0.00024596	DOWN
Pam16	-3.27519	2.28853e-08	1.29485e-06	DOWN		G-protein coupled receptor signaling pathway, coupled to cyclic nucleotide second messenger (GO:0007187)	105	0.00024853	UP
Mefv	3.71239	2.38592e-08	1.34427e-06	UP		regulation of G2/M transition of mitotic cell cycle (GO:0010389)	145	0.00025313	DOWN
Plk3	4.10672	2.39277e-08	1.34427e-06	UP		cellular response to bacterial lipopeptide (GO:0071221)	6	0.00026635	UP
Igsf6	2.71109	2.43763e-08	1.36464e-06	UP		response to corticosteroid (GO:0031960)	10	0.00027321	UP
Lgals3	2.25108	2.44715e-08	1.36517e-06	UP		autophagosome organization (GO:1905037)	46	0.00027584	DOWN
C4b	-1.96247	2.57737e-08	1.43279e-06	DOWN		mitochondrial protein processing (GO:0034982)	9	0.00028231	DOWN
S100a11	2.19467	2.62199e-08	1.45251e-06	UP		regulation of cellular amino acid metabolic process (GO:0006521)	50	0.00029681	DOWN
Tnxb	-1.83798	2.65416e-08	1.46523e-06	DOWN		regulation of cellular amine metabolic process (GO:0033238)	50	0.00029681	DOWN
Hif1a	1.77533	2.72003e-08	1.49639e-06	UP		regulation of primary metabolic process (GO:0080090)	135	0.00029681	DOWN
Abca2	-2.21932	2.7666e-08	1.51676e-06	DOWN		positive regulation of canonical Wnt signaling pathway (GO:0090263)	111	0.00029774	DOWN
Csdc2	-2.74776	2.82141e-08	1.5415e-06	DOWN		response to unfolded protein (GO:0006986)	41	0.00029774	DOWN
Sgms2	2.82977	2.84365e-08	1.54447e-06	UP		water-soluble vitamin metabolic process (GO:0006767)	70	0.00031195	DOWN
Mybpc3	-1.98878	2.84627e-08	1.54447e-06	DOWN		positive regulation of interleukin-6 production (GO:0032755)	40	0.00032609	UP
Osbpl1a	-1.90175	2.87312e-08	1.55373e-06	DOWN		negative regulation of cytokine biosynthetic process (GO:0042036)	20	0.00032609	UP
Serpinb2	5.61455	2.9967e-08	1.61507e-06	UP		organophosphate biosynthetic process (GO:0090407)	34	0.00032779	DOWN
Il33	2.55532	3.01897e-08	1.61787e-06	UP		positive regulation of sequestering of triglyceride (GO:0010890)	7	0.00032779	DOWN
Fsd2	-1.94261	3.02226e-08	1.61787e-06	DOWN		heart process (GO:0003015)	11	0.00033392	DOWN
Gpam	-1.6793	3.04316e-08	1.62034e-06	DOWN		tricarboxylic acid metabolic process (GO:0072350)	13	0.00033392	DOWN
Slc4a3	-1.93952	3.04725e-08	1.62034e-06	DOWN		positive regulation of cellular extravasation (GO:0002693)	6	0.00034038	UP
Kcnip2	-2.47209	3.07742e-08	1.63093e-06	DOWN		positive regulation of NF-kappaB transcription factor activity (GO:0051092)	123	0.00034038	UP
1110002E22Rik	1.69048	3.16682e-08	1.67274e-06	UP		enzyme linked receptor protein signaling pathway (GO:0007167)	116	0.00034264	UP
1700047I17Rik2	9.42806	3.1804e-08	1.67434e-06	UP		glycerophospholipid biosynthetic process (GO:0046474)	160	0.00034282	DOWN
Oxnad1	-2.05532	3.53329e-08	1.85399e-06	DOWN		positive regulation of TOR signaling (GO:0032008)	32	0.00034282	DOWN
Plin3	-2.00864	3.66765e-08	1.91816e-06	DOWN		autophagosome assembly (GO:0000045)	48	0.00035452	DOWN
Ppp1r3c	-1.68649	3.9577e-08	2.06307e-06	DOWN		positive regulation of glycogen biosynthetic process (GO:0045725)	12	0.00035769	DOWN
Ivns1abp	-1.54768	4.16057e-08	2.16173e-06	DOWN		regulation of mast cell activation (GO:0033003)	9	0.00036706	UP
Lcp1	1.80047	4.19022e-08	2.17005e-06	UP		regulation of establishment of planar polarity (GO:0090175)	88	0.0003675	DOWN
Tpd52	2.00406	4.50305e-08	2.32448e-06	UP		positive regulation of type 2 immune response (GO:0002830)	10	0.00036906	UP
Pot1b	3.21799	4.55178e-08	2.34203e-06	UP		tRNA aminoacylation (GO:0043039)	40	0.00037345	DOWN
Abcc8	-2.55946	4.79806e-08	2.46079e-06	DOWN		cell communication by electrical coupling involved in cardiac conduction (GO:0086064)	14	0.00038737	DOWN
Ptgr2	-1.7384	5.04363e-08	2.57842e-06	DOWN		negative regulation of leukocyte activation (GO:0002695)	11	0.00038872	UP
Iqgap1	1.65024	5.08079e-08	2.58908e-06	UP		positive regulation of reactive oxygen species metabolic process (GO:2000379)	36	0.00039055	UP
Pfkfb2	-2.12457	5.26112e-08	2.67242e-06	DOWN		cellular protein catabolic process (GO:0044257)	57	0.0004052	DOWN
Ldb3	-1.78106	5.54248e-08	2.80636e-06	DOWN		negative regulation of biomineral tissue development (GO:0070168)	13	0.00040837	UP
Slc2a4	-2.08954	5.62047e-08	2.83682e-06	DOWN		mitochondrial fission (GO:0000266)	17	0.00040946	DOWN
P2ry1	-2.15755	6.03741e-08	3.03762e-06	DOWN		negative regulation of ubiquitin protein ligase activity (GO:1904667)	77	0.00040946	DOWN
Acsl4	1.87679	6.05718e-08	3.03795e-06	UP		positive regulation of intracellular signal transduction (GO:1902533)	445	0.00041914	UP
Fndc3a	1.7737	6.37161e-08	3.18561e-06	UP		regulation of defense response (GO:0031347)	64	0.00042239	UP
Fkbp4	-2.03035	6.48452e-08	3.2251e-06	DOWN		negative regulation of bone remodeling (GO:0046851)	8	0.00042239	UP
Arg2	4.3072	6.49117e-08	3.2251e-06	UP		positive regulation of lymphocyte proliferation (GO:0050671)	61	0.00042441	UP
Gck	-2.50044	6.92004e-08	3.42747e-06	DOWN		regulation of cytokine production (GO:0001817)	91	0.0004378	UP
Gmpr	-1.90513	7.02192e-08	3.46713e-06	DOWN		regulation of ventricular cardiac muscle cell membrane repolarization (GO:0060307)	13	0.00044548	DOWN
Hspa1b	2.82601	7.19774e-08	3.54294e-06	UP		acetyl-CoA biosynthetic process (GO:0006085)	6	0.00047492	DOWN
Afg1l	-1.9789	7.61924e-08	3.73884e-06	DOWN		extracellular matrix organization (GO:0030198)	224	0.00050021	UP
Ppp1r14c	-1.89637	8.2513e-08	4.03481e-06	DOWN		regulation of toll-like receptor 2 signaling pathway (GO:0034135)	8	0.00051701	UP
Lifr	-1.67158	8.27315e-08	4.03481e-06	DOWN		T cell activation (GO:0042110)	73	0.00052138	UP
Efcab2	-2.00904	8.66579e-08	4.21337e-06	DOWN		regulation of superoxide anion generation (GO:0032928)	13	0.00052138	UP
Ndrg4	-1.78512	8.81809e-08	4.27435e-06	DOWN		regulation of ventricular cardiac muscle cell action potential (GO:0098911)	11	0.00052244	DOWN
Ptbp3	1.63919	8.89694e-08	4.29947e-06	UP		fatty acid transmembrane transport (GO:1902001)	11	0.00052244	DOWN
Acod1	3.78057	9.37918e-08	4.51878e-06	UP		carnitine shuttle (GO:0006853)	11	0.00052244	DOWN
Bcr	2.34185	9.70787e-08	4.663e-06	UP		protein targeting to vacuole (GO:0006623)	25	0.00053022	DOWN
Ak3	-1.71525	1.01712e-07	4.87085e-06	DOWN		negative regulation of B cell activation (GO:0050869)	16	0.00055264	UP
Picalm	1.63168	1.06029e-07	5.06234e-06	UP		regulation of response to external stimulus (GO:0032101)	94	0.0006049	UP
Esrra	-2.39789	1.11384e-07	5.30207e-06	DOWN		regulation of fatty acid beta-oxidation (GO:0031998)	10	0.00061028	DOWN
Txlnb	-1.58796	1.15416e-07	5.4776e-06	DOWN		apoptotic mitochondrial changes (GO:0008637)	32	0.00062302	DOWN
Ptx3	3.49562	1.19877e-07	5.65808e-06	UP		positive regulation of vasculature development (GO:1904018)	99	0.00064302	UP
Obscn	-1.93128	1.20204e-07	5.65808e-06	DOWN		negative regulation of T cell proliferation (GO:0042130)	21	0.00064712	UP
Pgam2	-1.94225	1.20286e-07	5.65808e-06	DOWN		skeletal myofibril assembly (GO:0014866)	11	0.00066119	DOWN
Sat1	2.30722	1.27467e-07	5.97178e-06	UP		regulation of T-helper 2 cell cytokine production (GO:2000551)	8	0.00069488	UP
Mettl7a1	-2.47594	1.27706e-07	5.97178e-06	DOWN		positive regulation of immunoglobulin secretion (GO:0051024)	6	0.00071278	UP
Dusp5	2.92036	1.30766e-07	6.09691e-06	UP		response to organic cyclic compound (GO:0014070)	66	0.00071278	UP
Lcp2	2.43937	1.3631e-07	6.33683e-06	UP		regulation of immunoglobulin secretion (GO:0051023)	6	0.00071278	UP
Sf3b1	1.56291	1.46913e-07	6.80983e-06	UP		regulation of transcription from RNA polymerase II promoter in response to hypoxia (GO:0061418)	76	0.00073985	DOWN
Lrp8	4.04195	1.53426e-07	7.09105e-06	UP		negative regulation of TOR signaling (GO:0032007)	39	0.00075156	DOWN
Dock10	2.04663	1.54538e-07	7.12175e-06	UP		ubiquitin-dependent ERAD pathway (GO:0030433)	56	0.0007528	DOWN
Tpm3	1.7506	1.55359e-07	7.1389e-06	UP		protein homotetramerization (GO:0051289)	52	0.00076021	DOWN
Abhd18	-2.01095	1.55938e-07	7.14482e-06	DOWN		negative regulation of lipid localization (GO:1905953)	9	0.00077916	UP
Kank2	-2.08881	1.57454e-07	7.19355e-06	DOWN		regulation of glycogen biosynthetic process (GO:0005979)	19	0.00079815	DOWN
Kcng2	-1.92428	1.644e-07	7.4219e-06	DOWN		negative regulation of Wnt signaling pathway (GO:0030178)	173	0.00080224	DOWN
Gpt2	-2.14832	1.6469e-07	7.4219e-06	DOWN		lymphocyte differentiation (GO:0030098)	66	0.00082048	UP
Ppbp	2.46054	1.64817e-07	7.4219e-06	UP		regulation of integrin-mediated signaling pathway (GO:2001044)	11	0.00082048	UP
Pirb	2.80003	1.64899e-07	7.4219e-06	UP		positive regulation of macromolecule metabolic process (GO:0010604)	264	0.00082048	UP
Cmc2	-2.40809	1.64935e-07	7.4219e-06	DOWN		phagocytosis, engulfment (GO:0006911)	28	0.00082048	UP
Pde4b	1.90135	1.65253e-07	7.4219e-06	UP		protein targeting to peroxisome (GO:0006625)	15	0.00086155	DOWN
Jak2	1.69199	1.69182e-07	7.57698e-06	UP		positive regulation of hemostasis (GO:1900048)	9	0.00086235	UP
Eml1	-1.93661	1.70408e-07	7.61043e-06	DOWN		positive regulation of coagulation (GO:0050820)	9	0.00086235	UP
Ttc9	3.30981	1.72724e-07	7.69228e-06	UP		proteolysis involved in cellular protein catabolic process (GO:0051603)	86	0.00088119	DOWN
Dcun1d2	-1.94295	1.86511e-07	8.26606e-06	DOWN		positive regulation of superoxide anion generation (GO:0032930)	11	0.00090197	UP
Gm28635	-4.29675	1.86648e-07	8.26606e-06	DOWN		protein maturation (GO:0051604)	80	0.00091694	DOWN
Gpt	-2.49339	1.94046e-07	8.56984e-06	DOWN		regulation of endothelial cell development (GO:1901550)	6	0.00092046	UP
Stab1	-1.77664	2.06864e-07	9.11059e-06	DOWN		regulation of cellular catabolic process (GO:0031329)	54	0.00094301	DOWN
Emb	2.53741	2.07955e-07	9.13338e-06	UP		sarcomere organization (GO:0045214)	30	0.00095506	DOWN
Synpo2l	2.0826	2.12228e-07	9.29536e-06	UP		ventricular cardiac muscle cell action potential (GO:0086005)	14	0.00097486	DOWN
Trp53inp2	-1.68215	2.1895e-07	9.56341e-06	DOWN		regulation of canonical Wnt signaling pathway (GO:0060828)	210	0.0010059	DOWN
Pdp2	-2.11458	2.29912e-07	1.00147e-05	DOWN		protein ubiquitination involved in ubiquitin-dependent protein catabolic process (GO:0042787)	70	0.0010341	DOWN
Slc12a7	-1.69084	2.3437e-07	1.0181e-05	DOWN		mitochondrial genome maintenance (GO:0000002)	13	0.0010341	DOWN
Ffar2	8.92904	2.45951e-07	1.0655e-05	UP		regulation of extrinsic apoptotic signaling pathway in absence of ligand (GO:2001239)	26	0.0010447	UP
Hspa12a	-2.29506	2.47774e-07	1.07048e-05	DOWN		regulation of NF-kappaB import into nucleus (GO:0042345)	24	0.0010447	UP
Klhl30	-2.21189	2.54435e-07	1.09628e-05	DOWN		positive regulation of tyrosine phosphorylation of STAT protein (GO:0042531)	48	0.0010568	UP
Osbp2	-2.75372	2.58098e-07	1.10905e-05	DOWN		positive regulation of cellular process (GO:0048522)	482	0.0010653	UP
Rassf1	2.22675	2.62836e-07	1.12358e-05	UP		T cell differentiation (GO:0030217)	38	0.0010823	UP
Gpr37	3.73685	2.62891e-07	1.12358e-05	UP		protein catabolic process (GO:0030163)	75	0.0010983	DOWN
Pptc7	-1.68972	2.76639e-07	1.17917e-05	DOWN		regulation of interleukin-8 production (GO:0032677)	33	0.0011591	UP
Adm	2.61172	2.84726e-07	1.20825e-05	UP		succinate metabolic process (GO:0006105)	8	0.0011899	DOWN
Thra	-1.98505	2.84982e-07	1.20825e-05	DOWN		response to tumor necrosis factor (GO:0034612)	80	0.0011901	UP
Rlf	1.65929	2.90393e-07	1.22792e-05	UP		myeloid cell development (GO:0061515)	14	0.0011901	UP
Pltp	-2.32	2.91419e-07	1.22899e-05	DOWN		regulation of mast cell degranulation (GO:0043304)	13	0.0012624	UP
Myadml2	-2.5953	2.93657e-07	1.23515e-05	DOWN		regulation of plasminogen activation (GO:0010755)	10	0.0012687	UP
Ms4a8a	4.7006	3.02492e-07	1.26895e-05	UP		negative regulation of blood coagulation (GO:0030195)	36	0.0013017	UP
Klhl6	2.38166	3.10814e-07	1.30043e-05	UP		protein O-linked mannosylation (GO:0035269)	9	0.0013199	DOWN
Heatr1	1.70874	3.16237e-07	1.31965e-05	UP		vacuolar transport (GO:0007034)	28	0.0013244	DOWN
Socs3	2.70118	3.33257e-07	1.38703e-05	UP		lipid biosynthetic process (GO:0008610)	66	0.001333	DOWN
Vmn1r181	8.8565	3.48825e-07	1.44803e-05	UP		ciliary basal body-plasma membrane docking (GO:0097711)	94	0.0013408	DOWN
Fxyd5	1.90678	3.4992e-07	1.4488e-05	UP		regulation of tyrosine phosphorylation of STAT protein (GO:0042509)	56	0.0013445	UP
Gpsm1	-2.07787	3.5326e-07	1.45883e-05	DOWN		positive regulation of glucose import (GO:0046326)	23	0.0013894	DOWN
2310057M21Rik	2.53147	3.57475e-07	1.47241e-05	UP		glutathione derivative biosynthetic process (GO:1901687)	21	0.0013983	DOWN
Cep170	1.70333	3.60055e-07	1.4792e-05	UP		glutathione derivative metabolic process (GO:1901685)	21	0.0013983	DOWN
St3gal3	-2.08442	3.76842e-07	1.54418e-05	DOWN		negative regulation of cell cycle G2/M phase transition (GO:1902750)	68	0.0013983	DOWN
Ank2	-1.53781	3.7851e-07	1.54703e-05	DOWN		ventricular cardiac muscle cell membrane repolarization (GO:0099625)	8	0.0013998	DOWN
Rbm38	-2.38396	3.81346e-07	1.55462e-05	DOWN		intracellular lipid transport (GO:0032365)	15	0.0014299	DOWN
Dele1	-2.00919	3.84779e-07	1.56398e-05	DOWN		positive regulation of tumor necrosis factor production (GO:0032760)	45	0.001444	UP
Ogdh	-1.66197	3.85609e-07	1.56398e-05	DOWN		modification-dependent protein catabolic process (GO:0019941)	138	0.0014554	DOWN
Asb14	-1.85804	3.92989e-07	1.58985e-05	DOWN		intraciliary transport (GO:0042073)	44	0.0014605	DOWN
Rnasel	2.4037	3.94385e-07	1.59145e-05	UP		positive regulation of JAK-STAT cascade (GO:0046427)	58	0.0015224	UP
Tnni3k	-1.60556	3.96546e-07	1.59612e-05	DOWN		positive regulation of multicellular organismal process (GO:0051240)	192	0.0015494	UP
Obsl1	-2.35859	4.1891e-07	1.68188e-05	DOWN		regulation of angiogenesis (GO:0045765)	168	0.0015905	UP
Sema6d	1.90497	4.21584e-07	1.68835e-05	UP		regulation of interleukin-6 production (GO:0032675)	40	0.0015905	UP
Gnl3	1.99658	4.24033e-07	1.6939e-05	UP		positive regulation of isomerase activity (GO:0010912)	7	0.0015905	UP
Ccn1	2.45673	4.47028e-07	1.78128e-05	UP		endoderm formation (GO:0001706)	36	0.0016004	UP
Actr3b	-2.31491	4.48459e-07	1.78251e-05	DOWN		negative regulation of lymphocyte activation (GO:0051250)	18	0.0016197	UP
Mypn	-1.63136	4.50055e-07	1.78439e-05	DOWN		regulation of leukocyte migration (GO:0002685)	13	0.0016273	UP
Arc	3.44007	4.56455e-07	1.80527e-05	UP		keratinocyte differentiation (GO:0030216)	47	0.0016497	UP
Herpud1	-1.68385	4.61753e-07	1.82169e-05	DOWN		protein localization to plasma membrane (GO:0072659)	125	0.001751	DOWN
Rangrf	-1.98699	4.65755e-07	1.83293e-05	DOWN		positive regulation of smooth muscle cell proliferation (GO:0048661)	36	0.0018063	UP
Hcar2	4.79822	4.78555e-07	1.87865e-05	UP		positive regulation of glycogen metabolic process (GO:0070875)	13	0.001839	DOWN
Kit	2.94185	4.80228e-07	1.88058e-05	UP		succinyl-CoA metabolic process (GO:0006104)	6	0.001839	DOWN
Kcne4	2.39703	4.83221e-07	1.88563e-05	UP		striated muscle myosin thick filament assembly (GO:0071688)	12	0.0018715	DOWN
Pank1	-1.812	4.83889e-07	1.88563e-05	DOWN		platelet aggregation (GO:0070527)	32	0.0018774	UP
Msrb2	-1.9829	4.91613e-07	1.91086e-05	DOWN		cytosolic transport (GO:0016482)	98	0.001894	DOWN
Tlr2	2.31926	4.92769e-07	1.91086e-05	UP		response to interleukin-1 (GO:0070555)	61	0.0019117	UP
Asb11	-1.56895	5.02828e-07	1.94137e-05	DOWN		protein import into mitochondrial inner membrane (GO:0045039)	7	0.0019282	DOWN
Ubash3b	2.49888	5.0308e-07	1.94137e-05	UP		microtubule nucleation (GO:0007020)	17	0.0019682	DOWN
Tpm4	1.44286	5.06176e-07	1.94859e-05	UP		peroxisomal transport (GO:0043574)	8	0.0020106	DOWN
Tet2	1.71219	5.08729e-07	1.95369e-05	UP		protein import into peroxisome matrix (GO:0016558)	12	0.0020239	DOWN
Pfkm	-1.76091	5.19013e-07	1.98838e-05	DOWN		T cell migration (GO:0072678)	13	0.0020405	UP
Aldh5a1	-2.00156	5.20734e-07	1.99018e-05	DOWN		myeloid leukocyte mediated immunity (GO:0002444)	8	0.0020457	UP
Tbc1d16	-2.06122	5.26993e-07	2.00927e-05	DOWN		positive regulation of myeloid leukocyte differentiation (GO:0002763)	32	0.0021419	UP
Kcnd2	-2.09192	5.28268e-07	2.00932e-05	DOWN		positive regulation of metanephros development (GO:0072216)	8	0.0021419	UP
Selenbp1	-1.58824	5.39678e-07	2.04781e-05	DOWN		misfolded or incompletely synthesized protein catabolic process (GO:0006515)	25	0.0022133	DOWN
Ppp1r12b	-1.72911	5.44299e-07	2.06043e-05	DOWN		protein localization to vacuole (GO:0072665)	8	0.002245	DOWN
Fam234a	-2.05446	5.45935e-07	2.06171e-05	DOWN		regulation of triglyceride biosynthetic process (GO:0010866)	13	0.0022602	DOWN
Tufm	-1.79976	5.48374e-07	2.06477e-05	DOWN		positive regulation of cell activation (GO:0050867)	9	0.0023656	UP
Apoe	-1.72454	5.49342e-07	2.06477e-05	DOWN		positive regulation of interferon-gamma production (GO:0032729)	38	0.0024073	UP
Lmcd1	1.70941	5.74767e-07	2.15524e-05	UP		positive regulation of glucose transport (GO:0010828)	22	0.0024356	DOWN
Oxld1	-2.5216	5.76592e-07	2.15699e-05	DOWN		regulation of mitochondrial membrane permeability (GO:0046902)	16	0.0024659	DOWN
Corin	-1.49626	5.80357e-07	2.16598e-05	DOWN		cardiac muscle fiber development (GO:0048739)	11	0.00248	DOWN
Alcam	2.56499	6.10639e-07	2.27367e-05	UP		regulation of mitochondrial translation (GO:0070129)	15	0.002491	DOWN
Taco1	-1.93809	6.21907e-07	2.31021e-05	DOWN		positive regulation of Wnt signaling pathway (GO:0030177)	138	0.002491	DOWN
Mmp8	2.74997	6.5446e-07	2.42547e-05	UP		negative regulation of mitochondrion organization (GO:0010823)	33	0.002491	DOWN
Ptpre	2.41473	6.58908e-07	2.43627e-05	UP		antigen processing and presentation of exogenous peptide antigen via MHC class I, TAP-dependent (GO:0002479)	67	0.0024916	DOWN
Psd4	2.56571	6.73163e-07	2.4832e-05	UP		regulation of adiponectin secretion (GO:0070163)	6	0.0025518	UP
Agl	-1.42981	6.81274e-07	2.50731e-05	DOWN		retrograde transport, vesicle recycling within Golgi (GO:0000301)	5	0.0025668	DOWN
Ppil1	-2.76701	7.66318e-07	2.81379e-05	DOWN		regulation of dendritic cell antigen processing and presentation (GO:0002604)	7	0.0025741	UP
Id2	2.31763	7.69247e-07	2.81803e-05	UP		DNA-templated transcription, initiation (GO:0006352)	182	0.0027222	DOWN
Glis3	3.03361	7.82681e-07	2.85766e-05	UP		glutathione metabolic process (GO:0006749)	45	0.0027222	DOWN
Tmem38a	-1.69031	7.83658e-07	2.85766e-05	DOWN		positive regulation of protein kinase B signaling (GO:0051897)	118	0.0027321	UP
Endog	-2.26216	8.22837e-07	2.99366e-05	DOWN		complement receptor mediated signaling pathway (GO:0002430)	8	0.0027321	UP
Sgca	-1.71384	8.41709e-07	3.05533e-05	DOWN		regulation of transforming growth factor beta production (GO:0071634)	10	0.002758	UP
Sympk	-2.50779	8.5035e-07	3.07966e-05	DOWN		regulation of interleukin-6 biosynthetic process (GO:0045408)	9	0.0027604	UP
Col12a1	2.61184	8.61418e-07	3.11266e-05	UP		homotypic cell-cell adhesion (GO:0034109)	37	0.0028217	UP
Aldh1a3	3.59567	8.64417e-07	3.11641e-05	UP		transcription initiation from RNA polymerase II promoter (GO:0006367)	156	0.0028794	DOWN
Gpc1	-2.15688	8.8036e-07	3.16671e-05	DOWN		intraciliary transport involved in cilium assembly (GO:0035735)	40	0.0029281	DOWN
Cbr2	-2.20497	8.87315e-07	3.18452e-05	DOWN		positive regulation of macrophage activation (GO:0043032)	16	0.0029456	UP
Zfp948	2.26809	9.0913e-07	3.25546e-05	UP		proton transport (GO:0015992)	29	0.0029488	DOWN
Olfr731	23.4801	9.27816e-07	3.31491e-05	UP		T-helper 17 cell lineage commitment (GO:0072540)	6	0.0030101	UP
Dnajc28	-2.01039	9.33171e-07	3.32657e-05	DOWN		regulation of interleukin-2 production (GO:0032663)	21	0.0030101	UP
St6galnac6	-2.08113	9.41916e-07	3.35023e-05	DOWN		protein glycosylation (GO:0006486)	125	0.0030334	DOWN
Csta2	4.35694	9.63477e-07	3.41927e-05	UP		regulation of calcidiol 1-monooxygenase activity (GO:0060558)	7	0.0030498	UP
Irs1	-1.91608	9.73039e-07	3.44551e-05	DOWN		neutrophil activation (GO:0042119)	11	0.0030498	UP
Phb	-1.45749	9.77015e-07	3.4519e-05	DOWN		epiboly involved in wound healing (GO:0090505)	13	0.0031013	UP
Junb	2.34993	9.82786e-07	3.46459e-05	UP		intracellular protein transport (GO:0006886)	309	0.0033089	DOWN
Olfr152	3.50511	1.0905e-06	3.8358e-05	UP		regulation of innate immune response (GO:0045088)	60	0.0033245	UP
Rsrp1	-3.19357	1.15147e-06	4.04049e-05	DOWN		negative regulation of phagocytosis (GO:0050765)	9	0.0033752	UP
Peak1	1.51756	1.15377e-06	4.04049e-05	UP		positive regulation of NF-kappaB import into nucleus (GO:0042346)	15	0.0034991	UP
Sertad1	2.29761	1.15814e-06	4.04688e-05	UP		valine metabolic process (GO:0006573)	7	0.0035637	DOWN
Klra2	3.43643	1.16631e-06	4.06649e-05	UP		pattern recognition receptor signaling pathway (GO:0002221)	44	0.0035922	UP
Jph2	-2.03488	1.16967e-06	4.06927e-05	DOWN		regulation of interleukin-1 beta secretion (GO:0050706)	26	0.0035922	UP
2410004P03Rik	3.44701	1.1862e-06	4.11625e-05	UP		protein exit from endoplasmic reticulum (GO:0032527)	18	0.003601	DOWN
C1qc	-1.75688	1.18835e-06	4.11625e-05	DOWN		regulation of cellular ketone metabolic process (GO:0010565)	60	0.003601	DOWN
Akap2	1.71668	1.19293e-06	4.12313e-05	UP		mitochondrion distribution (GO:0048311)	11	0.0036797	DOWN
Slc25a42	-2.08233	1.232e-06	4.24892e-05	DOWN		positive regulation of mitophagy in response to mitochondrial depolarization (GO:0098779)	6	0.0036797	DOWN
Oxct1	-1.43733	1.28339e-06	4.41659e-05	DOWN		cellular response to amino acid stimulus (GO:0071230)	31	0.0036921	DOWN
Pdk2	-1.79622	1.30222e-06	4.47169e-05	DOWN		intra-Golgi vesicle-mediated transport (GO:0006891)	31	0.0037131	DOWN
Pcsk6	-2.12564	1.31332e-06	4.50011e-05	DOWN		mitochondrion disassembly (GO:0061726)	35	0.0037153	DOWN
Ifitm6	3.62867	1.32927e-06	4.54494e-05	UP		virion attachment to host cell (GO:0019062)	7	0.0037153	DOWN
Dipk1b	-2.50646	1.36826e-06	4.66824e-05	DOWN		arginine catabolic process (GO:0006527)	8	0.0037389	UP
Fahd1	-1.8642	1.41461e-06	4.81537e-05	DOWN		viral process (GO:0016032)	210	0.0037481	DOWN
Ndufb10	-1.68597	1.41744e-06	4.81537e-05	DOWN		regulation of wound healing, spreading of epidermal cells (GO:1903689)	6	0.0038131	DOWN
Srl	-1.34186	1.45368e-06	4.92793e-05	DOWN		phospholipase C-activating G-protein coupled receptor signaling pathway (GO:0007200)	79	0.0038375	UP
Olfm4	4.578	1.48176e-06	5.01245e-05	UP		regulation of platelet activation (GO:0010543)	19	0.0038781	UP
Wfdc21	3.39069	1.51237e-06	5.10512e-05	UP		negative regulation of G2/M transition of mitotic cell cycle (GO:0010972)	61	0.0038869	DOWN
Sdc4	2.27862	1.59651e-06	5.37773e-05	UP		extracellular matrix disassembly (GO:0022617)	74	0.003944	UP
Actc1	-1.38331	1.62502e-06	5.46219e-05	DOWN		positive regulation of epithelial cell apoptotic process (GO:1904037)	13	0.0040057	UP
Ifngr2	-1.48633	1.66004e-06	5.56814e-05	DOWN		Golgi to endosome transport (GO:0006895)	16	0.0040786	DOWN
Gsr	1.94371	1.67577e-06	5.60905e-05	UP		organelle fusion (GO:0048284)	16	0.0041675	DOWN
Fbxo40	-1.43833	1.69488e-06	5.66112e-05	DOWN		positive regulation of T cell differentiation (GO:0045582)	29	0.0041677	UP
H3f3b	1.63456	1.72276e-06	5.74216e-05	UP		establishment of protein localization to peroxisome (GO:0072663)	7	0.0041888	DOWN
Ank	-1.85062	1.79082e-06	5.95653e-05	DOWN		granulocyte activation (GO:0036230)	7	0.0043111	UP
Soat2	3.63971	1.83577e-06	6.09331e-05	UP		positive regulation of hormone metabolic process (GO:0032352)	6	0.0043504	UP
Rbm5	-1.85491	1.85017e-06	6.12829e-05	DOWN		response to glucocorticoid (GO:0051384)	24	0.0043504	UP
Smpd1	-1.56757	1.89428e-06	6.25056e-05	DOWN		urea cycle (GO:0000050)	11	0.004408	UP
Mmp9	2.57189	1.89494e-06	6.25056e-05	UP		negative regulation of signal transduction in absence of ligand (GO:1901099)	22	0.0044105	UP
Ctps	1.54275	1.90326e-06	6.26499e-05	UP		negative regulation of extrinsic apoptotic signaling pathway in absence of ligand (GO:2001240)	22	0.0044105	UP
Etfb	-1.65846	1.91386e-06	6.27595e-05	DOWN		cellular polysaccharide catabolic process (GO:0044247)	17	0.0044826	DOWN
Pgm5	-1.69357	1.91702e-06	6.27595e-05	DOWN		positive regulation of nitric-oxide synthase biosynthetic process (GO:0051770)	8	0.0046368	UP
Plxnb1	-2.0492	1.91995e-06	6.27595e-05	DOWN		positive regulation of neuron death (GO:1901216)	36	0.0046368	UP
Il10rb	-1.97819	1.92238e-06	6.27595e-05	DOWN		protein localization to organelle (GO:0033365)	94	0.0047084	DOWN
Lrrc2	-1.46089	1.93775e-06	6.31318e-05	DOWN		endosome to lysosome transport (GO:0008333)	46	0.0047354	DOWN
Lilr4b	4.60866	1.95454e-06	6.35484e-05	UP		hydrogen ion transmembrane transport (GO:1902600)	26	0.0047713	DOWN
Acad11	-1.40345	1.97448e-06	6.40657e-05	DOWN		mRNA processing (GO:0006397)	276	0.0047975	DOWN
Rapsn	-3.21335	1.98271e-06	6.42017e-05	DOWN		acylglycerol biosynthetic process (GO:0046463)	18	0.0047981	DOWN
Tuba1c	1.67491	1.9873e-06	6.42197e-05	UP		regulation of blood vessel endothelial cell proliferation involved in sprouting angiogenesis (GO:1903587)	10	0.0048152	UP
Pilra	2.7738	2.0354e-06	6.56407e-05	UP		regulation of establishment of endothelial barrier (GO:1903140)	12	0.0048301	UP
Atp2a2	-1.66872	2.04896e-06	6.5944e-05	DOWN		positive regulation of calcium ion import (GO:0090280)	10	0.0048301	UP
Mfn1	-1.52214	2.13056e-06	6.8432e-05	DOWN		engulfment of apoptotic cell (GO:0043652)	9	0.0048439	UP
Fn3k	-2.71312	2.14053e-06	6.86136e-05	DOWN		positive regulation of pathway-restricted SMAD protein phosphorylation (GO:0010862)	47	0.0048917	UP
Grm1	-1.92504	2.16826e-06	6.93624e-05	DOWN		positive regulation of fatty acid beta-oxidation (GO:0032000)	7	0.0049782	DOWN
Hspa1a	2.43647	2.17387e-06	6.94022e-05	UP		phosphatidylinositol biosynthetic process (GO:0006661)	95	0.0050029	DOWN
Ddx21	1.57434	2.17882e-06	6.94209e-05	UP		vesicle-mediated transport (GO:0016192)	374	0.0050029	DOWN
Smyd1	-1.41381	2.21346e-06	7.03837e-05	DOWN		cardiac muscle tissue morphogenesis (GO:0055008)	35	0.0051864	DOWN
Dlat	-1.78689	2.22735e-06	7.06838e-05	DOWN		regulation of organelle organization (GO:0033043)	97	0.0051918	DOWN
Bcl2a1a	6.45962	2.25053e-06	7.12144e-05	UP		regulation of proteolysis involved in cellular protein catabolic process (GO:1903050)	23	0.0051918	DOWN
Slc38a3	-2.17556	2.25303e-06	7.12144e-05	DOWN		phospholipid biosynthetic process (GO:0008654)	36	0.0052165	DOWN
Plekhf1	-2.35018	2.27026e-06	7.16167e-05	DOWN		skeletal muscle cell differentiation (GO:0035914)	12	0.0052642	UP
Rnf128	-1.66382	2.31114e-06	7.27622e-05	DOWN		regulation of complement activation (GO:0030449)	37	0.0053106	DOWN
Lama5	-1.80847	2.33003e-06	7.32118e-05	DOWN		protein modification process (GO:0036211)	80	0.0053106	DOWN
Fbln1	-2.06167	2.34591e-06	7.35654e-05	DOWN		nucleotide-excision repair, DNA damage recognition (GO:0000715)	23	0.0053106	DOWN
Klhdc1	-2.16885	2.37154e-06	7.42226e-05	DOWN		hydrogen peroxide metabolic process (GO:0042743)	17	0.0053106	DOWN
Ncl	1.50645	2.40801e-06	7.5216e-05	UP		regulation of wound healing (GO:0061041)	33	0.0054011	UP
Slc25a13	-1.5378	2.43927e-06	7.60432e-05	DOWN		regulation of lipid biosynthetic process (GO:0046890)	27	0.0054146	DOWN
Ifrd1	1.67085	2.52984e-06	7.87121e-05	UP		positive regulation of interleukin-1 beta secretion (GO:0050718)	21	0.0054264	UP
Phlda1	2.71191	2.5385e-06	7.88274e-05	UP		canonical glycolysis (GO:0061621)	24	0.0055466	DOWN
Odc1	1.7847	2.56588e-06	7.95221e-05	UP		glycolytic process through glucose-6-phosphate (GO:0061620)	24	0.0055466	DOWN
Rhot2	-1.94481	2.57544e-06	7.96152e-05	DOWN		glucose catabolic process to pyruvate (GO:0061718)	24	0.0055466	DOWN
Efhd2	2.05922	2.57889e-06	7.96152e-05	UP		phosphatidic acid biosynthetic process (GO:0006654)	38	0.0055466	DOWN
Fam107b	2.03438	2.63198e-06	8.10064e-05	UP		negative regulation of canonical Wnt signaling pathway (GO:0090090)	148	0.0055723	DOWN
Mettl17	-3.95772	2.63415e-06	8.10064e-05	DOWN		autophagy of mitochondrion (GO:0000422)	37	0.0055723	DOWN
Sgcg	-1.4099	2.67473e-06	8.20955e-05	DOWN		SRP-dependent cotranslational protein targeting to membrane (GO:0006614)	86	0.0056879	DOWN
Uba7	-8.18752	2.68378e-06	8.22145e-05	DOWN		regulation of lipid kinase activity (GO:0043550)	11	0.0056879	DOWN
Bves	-1.82693	2.70156e-06	8.26002e-05	DOWN		glycogen catabolic process (GO:0005980)	16	0.0056879	DOWN
Ctsf	-1.98311	2.71521e-06	8.28154e-05	DOWN		negative regulation of kinase activity (GO:0033673)	87	0.0057648	DOWN
Miga2	-1.87742	2.71902e-06	8.28154e-05	DOWN		cilium organization (GO:0044782)	165	0.0057648	DOWN
Tcp11l2	-1.69134	2.78486e-06	8.46587e-05	DOWN		antigen processing and presentation of exogenous peptide antigen via MHC class I (GO:0042590)	70	0.0058163	DOWN
Angpt2	2.45284	2.85141e-06	8.65163e-05	UP		positive regulation of potassium ion transmembrane transport (GO:1901381)	14	0.0059489	DOWN
Fcgr3	1.62356	2.89614e-06	8.77062e-05	UP		positive regulation of podosome assembly (GO:0071803)	6	0.0060556	UP
Cox7a2l	-1.42468	2.90866e-06	8.79179e-05	DOWN		positive regulation of osteoclast differentiation (GO:0045672)	14	0.0060556	UP
Gnpat	-1.47091	2.92556e-06	8.82609e-05	DOWN		adenylate cyclase-modulating G-protein coupled receptor signaling pathway (GO:0007188)	125	0.0060556	UP
Mdh1	-1.28308	2.96069e-06	8.91514e-05	DOWN		sulfur compound catabolic process (GO:0044273)	35	0.0061683	DOWN
Atp1a2	-1.66333	3.04101e-06	9.13969e-05	DOWN		negative regulation of myeloid leukocyte differentiation (GO:0002762)	23	0.0062737	UP
Pgpep1	-1.95651	3.10257e-06	9.30713e-05	DOWN		regulation of proteasomal protein catabolic process (GO:0061136)	39	0.0063189	DOWN
Slc15a3	2.71775	3.1269e-06	9.36243e-05	UP		protein tetramerization (GO:0051262)	83	0.0063848	DOWN
Cand2	-1.60055	3.1923e-06	9.53079e-05	DOWN		regulation of mitochondrial membrane potential (GO:0051881)	33	0.0063848	DOWN
Cluh	-1.67258	3.19511e-06	9.53079e-05	DOWN		alpha-amino acid metabolic process (GO:1901605)	29	0.0063944	DOWN
Hp	2.03831	3.24613e-06	9.66484e-05	UP		bundle of His cell to Purkinje myocyte communication (GO:0086069)	8	0.0064005	DOWN
Il1f9	2.62913	3.30855e-06	9.83228e-05	UP		autophagosome maturation (GO:0097352)	22	0.0065861	DOWN
Naprt	-2.54716	3.32172e-06	9.85298e-05	DOWN		regulation of peptidyl-tyrosine phosphorylation (GO:0050730)	77	0.0066506	UP
Lmf1	-2.57493	3.37358e-06	9.98817e-05	DOWN		short-chain fatty acid catabolic process (GO:0019626)	7	0.0066964	DOWN
Vmn2r63	3.1752	3.40728e-06	0.000100692	UP		hyaluronan biosynthetic process (GO:0030213)	7	0.0067171	UP
Plcxd2	3.38923	3.5617e-06	0.00010506	UP		circulatory system development (GO:0072359)	104	0.0067463	DOWN
Coq5	-1.62187	3.58029e-06	0.000105413	DOWN		acetyl-CoA metabolic process (GO:0006084)	14	0.0067463	DOWN
Idh3a	-1.46581	3.6129e-06	0.000106177	DOWN		positive regulation of calcium ion transmembrane transporter activity (GO:1901021)	17	0.0068203	DOWN
Fcrls	-2.84053	3.61982e-06	0.000106184	DOWN		positive regulation of interleukin-2 biosynthetic process (GO:0045086)	8	0.0068738	UP
Spred3	4.32058	3.62829e-06	0.000106236	UP		regulation of blood circulation (GO:1903522)	33	0.0070164	DOWN
Ckmt2	-1.30241	3.68331e-06	0.000107649	DOWN		androgen metabolic process (GO:0008209)	17	0.0070229	UP
Vldlr	-1.33104	3.83162e-06	0.000111778	DOWN		protein deacetylation (GO:0006476)	30	0.0072082	DOWN
Cyp2u1	-1.96128	3.92e-06	0.000114147	DOWN		aspartate family amino acid catabolic process (GO:0009068)	19	0.0072398	DOWN
Cog6	-1.58668	3.96703e-06	0.000115305	DOWN		protein targeting to ER (GO:0045047)	92	0.0073184	DOWN
Rnf115	1.65633	4.05093e-06	0.000117492	UP		nucleotide-excision repair, preincision complex assembly (GO:0006294)	29	0.0074752	DOWN
Coro1a	2.22473	4.05705e-06	0.000117492	UP		COPII-coated vesicle budding (GO:0090114)	65	0.0074849	DOWN
Srpk3	-2.31527	4.06667e-06	0.000117556	DOWN		positive regulation of adaptive immune response based on somatic recombination of immune receptors built from immunoglobulin superfamily domains (GO:0002824)	10	0.0075457	UP
Mdn1	1.4321	4.12839e-06	0.000119124	UP		regulation of interleukin-2 biosynthetic process (GO:0045076)	12	0.0075769	UP
Btbd2	-2.34633	4.16999e-06	0.000120106	DOWN		cobalamin metabolic process (GO:0009235)	17	0.007631	DOWN
Gmnn	-1.92816	4.20958e-06	0.000121027	DOWN		tetrapyrrole metabolic process (GO:0033013)	17	0.007631	DOWN
Dynll2	-2.12877	4.33724e-06	0.00012439	DOWN		protein N-linked glycosylation (GO:0006487)	72	0.0077534	DOWN
Adcy5	-1.90279	4.34218e-06	0.00012439	DOWN		immune response-activating cell surface receptor signaling pathway (GO:0002429)	15	0.0078953	UP
Rassf5	2.48707	4.38427e-06	0.000125255	UP		positive regulation of pri-miRNA transcription from RNA polymerase II promoter (GO:1902895)	18	0.0079112	UP
Abcb8	-1.9174	4.38814e-06	0.000125255	DOWN		regulation of interleukin-18 production (GO:0032661)	6	0.007936	UP
Sdhaf4	-2.15628	4.42384e-06	0.000126048	DOWN		positive regulation of granulocyte macrophage colony-stimulating factor production (GO:0032725)	11	0.0079465	UP
Ptprs	-1.93193	4.43644e-06	0.00012618	DOWN		response to insulin (GO:0032868)	69	0.007973	DOWN
Coq10a	-1.8827	4.5078e-06	0.000127981	DOWN		protein-DNA complex assembly (GO:0065004)	78	0.0082488	DOWN
Spred1	1.61103	4.58433e-06	0.000129922	UP		positive regulation of interleukin-1 secretion (GO:0050716)	24	0.0083705	UP
Olfml2b	-2.22062	4.59449e-06	0.000129978	DOWN		nucleotide-excision repair, DNA incision (GO:0033683)	38	0.0085088	DOWN
Nos2	2.75505	4.73546e-06	0.000133729	UP		amide transport (GO:0042886)	14	0.0085416	DOWN
Dhrs9	2.68656	4.96156e-06	0.000139865	UP		IRE1-mediated unfolded protein response (GO:0036498)	54	0.0086268	DOWN
Abhd12	-2.65478	4.98542e-06	0.000140289	DOWN		cellular modified amino acid catabolic process (GO:0042219)	12	0.0086997	DOWN
Acss1	-1.57112	5.01314e-06	0.00014082	DOWN		positive regulation of glucose import in response to insulin stimulus (GO:2001275)	9	0.0090928	DOWN
Plekha6	-1.82	5.04678e-06	0.000141515	DOWN		cell cycle G2/M phase transition (GO:0044839)	124	0.0090928	DOWN
Gnb5	-2.16456	5.22931e-06	0.000146375	DOWN		protein localization to pre-autophagosomal structure (GO:0034497)	11	0.0090928	DOWN
Chst11	2.4037	5.30018e-06	0.000148098	UP		protein repair (GO:0030091)	5	0.0091629	DOWN
Thbd	2.03965	5.36435e-06	0.000149628	UP		astral microtubule organization (GO:0030953)	6	0.0092172	DOWN
Tnfaip3	2.5456	5.39094e-06	0.000150106	UP		positive regulation of sequence-specific DNA binding transcription factor activity (GO:0051091)	207	0.0093324	UP
Mical1	2.19334	5.68145e-06	0.000157918	UP		regulation of TORC1 signaling (GO:1903432)	27	0.0093658	DOWN
Entpd3	5.8353	5.76241e-06	0.000159889	UP		nucleic acid-templated transcription (GO:0097659)	72	0.0096639	DOWN
Apobr	3.23394	5.8712e-06	0.000162624	UP		negative regulation of mitotic cell cycle phase transition (GO:1901991)	76	0.0096639	DOWN
Myh6	-1.67508	6.00194e-06	0.000165956	DOWN		mitochondrion localization (GO:0051646)	15	0.0098757	DOWN
Stk39	-1.75443	6.04113e-06	0.00016675	DOWN		keratan sulfate catabolic process (GO:0042340)	12	0.0098757	DOWN
Flnc	1.53559	6.11648e-06	0.000168537	UP		protein maturation by iron-sulfur cluster transfer (GO:0097428)	6	0.010099	DOWN
Rbpj	1.49919	6.15638e-06	0.000169343	UP		cotranslational protein targeting to membrane (GO:0006613)	89	0.010202	DOWN
Rnaset2a	-1.97341	6.19133e-06	0.00017001	DOWN		activin receptor signaling pathway (GO:0032924)	16	0.010203	UP
Sdr39u1	-1.79054	6.20674e-06	0.00017014	DOWN		organelle transport along microtubule (GO:0072384)	30	0.010318	DOWN
Glipr2	1.94607	6.3468e-06	0.000173679	UP		cytoplasmic translation (GO:0002181)	50	0.010348	DOWN
Hexa	-1.88287	6.41763e-06	0.000175113	DOWN		regulation of cytokine secretion (GO:0050707)	28	0.010442	UP
Nop56	1.6012	6.42121e-06	0.000175113	UP		regulation of cardiac muscle cell membrane potential (GO:0086036)	7	0.010457	DOWN
Chchd7	-1.81296	6.4883e-06	0.000176639	DOWN		protein deglycosylation (GO:0006517)	9	0.010457	DOWN
Plpp7	-2.37795	6.52332e-06	0.000177289	DOWN		long-term synaptic potentiation (GO:0060291)	20	0.010516	UP
Fuca2	-1.50977	6.7677e-06	0.000183557	DOWN		cellular response to DNA damage stimulus (GO:0006974)	311	0.010789	DOWN
Wdfy1	2.13375	6.77704e-06	0.000183557	UP		negative regulation of cell adhesion mediated by integrin (GO:0033629)	7	0.01079	UP
E2f6	-2.04023	6.81422e-06	0.00018425	DOWN		positive regulation of reproductive process (GO:2000243)	10	0.010793	UP
Ly6c2	4.14552	6.9031e-06	0.000186337	UP		regulation of cell cycle G2/M phase transition (GO:1902749)	81	0.01085	DOWN
Cd274	2.09272	6.92161e-06	0.00018652	UP		G2/M transition of mitotic cell cycle (GO:0000086)	123	0.010911	DOWN
Mfhas1	-1.72919	6.94766e-06	0.000186905	DOWN		positive regulation of transcription from RNA polymerase II promoter involved in cellular response to chemical stimulus (GO:1901522)	21	0.010959	UP
Pnkd	-1.88643	6.97155e-06	0.000187231	DOWN		negative regulation of leukocyte migration (GO:0002686)	7	0.010959	UP
Birc3	1.79527	7.04452e-06	0.000188728	UP		negative regulation of cell communication (GO:0010648)	77	0.010959	UP
Rbfox1	-2.0154	7.05105e-06	0.000188728	DOWN		cellular response to peptide hormone stimulus (GO:0071375)	107	0.01106	DOWN
Saa3	2.76426	7.08179e-06	0.000189232	UP		regulation of cardiac muscle cell membrane repolarization (GO:0099623)	17	0.011066	DOWN
Hdc	2.43188	7.36512e-06	0.000196209	UP		coenzyme metabolic process (GO:0006732)	47	0.011139	DOWN
Tnni3	-1.23636	7.36754e-06	0.000196209	DOWN		negative regulation of signaling (GO:0023057)	82	0.011513	UP
Ndufaf3	-2.08422	7.43674e-06	0.00019772	DOWN		endoplasmic reticulum calcium ion homeostasis (GO:0032469)	18	0.011543	DOWN
Lilra6	4.28217	7.55448e-06	0.000200515	UP		nucleic acid phosphodiester bond hydrolysis (GO:0090305)	70	0.011543	DOWN
Ndufa8	-1.86725	7.59665e-06	0.000201298	DOWN		endoplasmic reticulum to cytosol transport (GO:1903513)	16	0.011917	DOWN
Bcl2a1d	4.1246	7.72032e-06	0.000204214	UP		collagen biosynthetic process (GO:0032964)	6	0.011917	DOWN
Rdh12	8.46485	7.73235e-06	0.000204214	UP		response to alkaloid (GO:0043279)	23	0.011961	UP
Chchd10	-1.75567	7.74529e-06	0.000204216	DOWN		purine ribonucleoside monophosphate metabolic process (GO:0009167)	38	0.012161	DOWN
Bcs1l	-2.0762	7.78721e-06	0.000204981	DOWN		actin-myosin filament sliding (GO:0033275)	38	0.012226	DOWN
Pygb	-1.49654	7.82989e-06	0.000205616	DOWN		peroxisome fission (GO:0016559)	9	0.012226	DOWN
Usp2	-1.7685	7.83718e-06	0.000205616	DOWN		muscle filament sliding (GO:0030049)	38	0.012226	DOWN
Il1r1	1.59086	7.86596e-06	0.000206023	UP		regulation of cholesterol metabolic process (GO:0090181)	39	0.012289	DOWN
Dnaja3	-1.46193	7.88611e-06	0.000206023	DOWN		response to interferon-gamma (GO:0034341)	54	0.012332	UP
Prpf19	-1.41741	7.89156e-06	0.000206023	DOWN		positive regulation of mitochondrial fission (GO:0090141)	13	0.012437	DOWN
Ppp1r15a	1.98254	7.94493e-06	0.000207076	UP		establishment of mitochondrion localization, microtubule-mediated (GO:0034643)	6	0.012612	DOWN
Mxd1	2.28481	8.00131e-06	0.000208204	UP		mitochondrial calcium uptake (GO:0036444)	9	0.012655	DOWN
Ttll1	-1.88788	8.04092e-06	0.000208564	DOWN		cell part morphogenesis (GO:0032990)	10	0.012723	DOWN
Gm4450	4.67731	8.04135e-06	0.000208564	UP		mRNA splicing, via spliceosome (GO:0000398)	255	0.012723	DOWN
Calcoco1	-1.58863	8.08802e-06	0.000209432	DOWN		myosin filament assembly (GO:0031034)	10	0.01273	DOWN
B4galnt1	8.53498	8.10959e-06	0.000209649	UP		cellular response to misfolded protein (GO:0071218)	21	0.01273	DOWN
Gm3755	3.72638	8.21476e-06	0.00021168	UP		striated muscle tissue development (GO:0014706)	29	0.012863	DOWN
Il11ra1	-1.63336	8.21478e-06	0.00021168	DOWN		cellular response to insulin stimulus (GO:0032869)	107	0.012983	DOWN
Hspe1	-1.40921	8.23668e-06	0.000211884	DOWN		positive regulation of mitochondrial translation (GO:0070131)	9	0.013	DOWN
Atf4	1.49476	8.24932e-06	0.000211884	UP		cardiac muscle cell-cardiac muscle cell adhesion (GO:0086042)	7	0.013317	DOWN
Nudt8	-1.85815	8.28154e-06	0.000212368	DOWN		negative regulation of macroautophagy (GO:0016242)	20	0.0135	DOWN
Mrpl18	-1.48611	8.30663e-06	0.000212668	DOWN		bundle of His cell-Purkinje myocyte adhesion involved in cell communication (GO:0086073)	6	0.013545	DOWN
Slc25a39	-1.98354	8.44584e-06	0.000215885	DOWN		negative regulation of phospholipid metabolic process (GO:1903726)	6	0.013933	DOWN
Tnfrsf10b	2.39443	8.48487e-06	0.000216443	UP		cell chemotaxis (GO:0060326)	50	0.01394	UP
Nav3	1.97466	8.49492e-06	0.000216443	UP		gland morphogenesis (GO:0022612)	6	0.01394	UP
Acot13	-1.45837	8.53503e-06	0.000217118	DOWN		regulation of cardiac muscle cell action potential involved in regulation of contraction (GO:0098909)	8	0.01398	DOWN
Mrpl55	-1.63403	8.58275e-06	0.000217983	DOWN		positive regulation of cytokine secretion (GO:0050715)	61	0.014157	UP
Gadd45g	2.47123	8.61546e-06	0.000218464	UP		atrial cardiac muscle cell to AV node cell signaling (GO:0086026)	7	0.01419	DOWN
Tsc22d3	-1.39362	8.92196e-06	0.000225579	DOWN		glucan catabolic process (GO:0009251)	16	0.014267	DOWN
Ccr5	2.06056	8.92442e-06	0.000225579	UP		epidermal cell differentiation (GO:0009913)	55	0.014455	UP
Sspn	-1.57652	8.94567e-06	0.000225758	DOWN		triglyceride biosynthetic process (GO:0019432)	18	0.0145	DOWN
Tom1l2	-1.51103	9.00755e-06	0.000226959	DOWN		O-glycan processing (GO:0016266)	58	0.014518	UP
Slc25a11	-1.37475	9.06478e-06	0.000228039	DOWN		wound healing, spreading of cells (GO:0044319)	19	0.014518	UP
Tgfb2	2.05462	9.19585e-06	0.000230796	UP		nucleotide-excision repair, DNA incision, 5 -to lesion (GO:0006296)	36	0.014529	DOWN
Hrasls	-2.20662	9.20338e-06	0.000230796	DOWN		embryonic heart tube development (GO:0035050)	16	0.014679	DOWN
Foxred1	-1.75874	9.2627e-06	0.000231824	DOWN		retrograde protein transport, ER to cytosol (GO:0030970)	17	0.014685	DOWN
Ccng1	-1.23643	9.28191e-06	0.000231824	DOWN		positive regulation of mitochondrial membrane potential (GO:0010918)	5	0.014786	DOWN
Rab3a	-2.36141	9.28812e-06	0.000231824	DOWN		regulation of cellular response to heat (GO:1900034)	76	0.01482	DOWN
Neurl3	2.08164	9.32979e-06	0.000232499	UP		response to amino acid (GO:0043200)	33	0.01482	DOWN
Dglucy	-1.63871	9.42387e-06	0.000234476	DOWN		purine ribonucleoside triphosphate metabolic process (GO:0009205)	32	0.014841	DOWN
Selplg	1.87248	9.64334e-06	0.000239562	UP		T cell chemotaxis (GO:0010818)	7	0.014876	UP
Ift172	-1.73308	9.73881e-06	0.000241556	DOWN		regulation of B cell receptor signaling pathway (GO:0050855)	16	0.014876	UP
Osbpl3	-2.0665	9.99944e-06	0.000247634	DOWN		regulation of NLRP3 inflammasome complex assembly (GO:1900225)	9	0.014933	UP
Fgd4	-1.68896	1.0225e-05	0.000252827	DOWN		defense response to Gram-negative bacterium (GO:0050829)	45	0.014997	UP
Adcy6	-1.83288	1.05427e-05	0.000260276	DOWN		peptidyl-lysine methylation (GO:0018022)	16	0.015135	DOWN
Hopx	-1.55528	1.05722e-05	0.000260601	DOWN		peptidyl-threonine phosphorylation (GO:0018107)	67	0.015135	DOWN
Steap3	-1.97951	1.07176e-05	0.000263775	DOWN		positive regulation of T cell apoptotic process (GO:0070234)	8	0.015136	UP
Paqr4	-2.10278	1.07499e-05	0.000264095	DOWN		positive regulation of macromolecule biosynthetic process (GO:0010557)	133	0.015197	UP
Pik3ip1	-1.89613	1.07638e-05	0.000264095	DOWN		regulation of protein activation cascade (GO:2000257)	36	0.015249	DOWN
Trim72	-1.93093	1.09984e-05	0.000269436	DOWN		lysine catabolic process (GO:0006554)	12	0.015354	DOWN
Mmut	-1.37753	1.10749e-05	0.000270893	DOWN		protein mannosylation (GO:0035268)	13	0.015354	DOWN
Klhdc8a	-2.78454	1.11503e-05	0.000272318	DOWN		ribonucleoside monophosphate biosynthetic process (GO:0009156)	14	0.015354	DOWN
Gpr157	-1.65346	1.12722e-05	0.000274691	DOWN		regulation of glucose import (GO:0046324)	27	0.015354	DOWN
Klhl38	-2.0796	1.1282e-05	0.000274691	DOWN		lysine metabolic process (GO:0006553)	12	0.015354	DOWN
Baz1a	1.72462	1.13648e-05	0.000276282	UP		protein modification by small protein removal (GO:0070646)	255	0.015381	DOWN
Aifm1	-1.54499	1.15156e-05	0.000279521	DOWN		positive regulation of synaptic transmission (GO:0050806)	65	0.015446	UP
Glrx	1.58989	1.17616e-05	0.000285056	UP		bone cell development (GO:0098751)	6	0.015608	UP
Rab11fip1	2.71568	1.18368e-05	0.000286443	UP		regulation of integrin activation (GO:0033623)	9	0.015685	UP
Spry4	2.14735	1.19191e-05	0.000287996	UP		aminoglycan catabolic process (GO:0006026)	29	0.015726	DOWN
Cmss1	-1.7563	1.20084e-05	0.000289714	DOWN		regulation of ion transmembrane transport (GO:0034765)	32	0.015793	DOWN
Csf3	8.46979	1.20821e-05	0.000290849	UP		protein complex disassembly (GO:0043241)	45	0.01585	DOWN
Map7d1	-1.81233	1.2092e-05	0.000290849	DOWN		protein localization to lysosome (GO:0061462)	27	0.015914	DOWN
C1qb	-1.58555	1.21722e-05	0.000292334	DOWN		negative regulation of leukocyte mediated cytotoxicity (GO:0001911)	6	0.015969	UP
Cacnb2	-1.71076	1.2218e-05	0.000292993	DOWN		alpha-linolenic acid metabolic process (GO:0036109)	12	0.016067	DOWN
Spcs3	1.4797	1.22488e-05	0.000293289	UP		regulation of proteolysis (GO:0030162)	58	0.016425	DOWN
Cyfip2	-1.68792	1.24751e-05	0.000298258	DOWN		DNA repair (GO:0006281)	272	0.016556	DOWN
Ccl9	1.46457	1.26528e-05	0.000302053	UP		regulation of bone mineralization (GO:0030500)	48	0.016588	UP
Acss2	-1.65518	1.27219e-05	0.000303246	DOWN		cellular response to nutrient levels (GO:0031669)	50	0.016893	DOWN
Tyrobp	1.72104	1.27591e-05	0.000303678	UP		regulation of mitochondrial fission (GO:0090140)	18	0.01714	DOWN
Tomm40l	-1.70875	1.27806e-05	0.000303736	DOWN		peptide catabolic process (GO:0043171)	23	0.01714	DOWN
Hsd3b2	3.11675	1.28702e-05	0.000305407	UP		positive regulation of lipid biosynthetic process (GO:0046889)	27	0.01714	DOWN
Lamb2	-1.56703	1.30464e-05	0.000309128	DOWN		regulation of interleukin-12 production (GO:0032655)	32	0.017328	UP
Lingo3	-3.08712	1.31121e-05	0.000310223	DOWN		negative regulation of cytokine production (GO:0001818)	105	0.017498	UP
Rpl3l	-1.73818	1.31806e-05	0.000311381	DOWN		antigen processing and presentation of exogenous peptide antigen via MHC class II (GO:0019886)	78	0.017555	DOWN
Gas6	-1.80765	1.35109e-05	0.000318708	DOWN		antigen processing and presentation of peptide antigen via MHC class II (GO:0002495)	78	0.017555	DOWN
Gtf3c1	-1.55134	1.36988e-05	0.000322663	DOWN		antigen processing and presentation of exogenous peptide antigen (GO:0002478)	78	0.017555	DOWN
Aldh4a1	-1.91024	1.3956e-05	0.000328106	DOWN		regulation of hematopoietic progenitor cell differentiation (GO:1901532)	75	0.017861	DOWN
Ifi27l2a	-1.74258	1.39712e-05	0.000328106	DOWN		regulation of membrane repolarization (GO:0060306)	14	0.018046	DOWN
Hmcn2	-1.81236	1.40165e-05	0.000328685	DOWN		glycerol metabolic process (GO:0006071)	10	0.018053	DOWN
Mrpl12	-1.76337	1.41633e-05	0.000331639	DOWN		regulation of microtubule polymerization or depolymerization (GO:0031110)	18	0.01808	DOWN
Cyc1	-1.70692	1.42535e-05	0.000333259	DOWN		protein K11-linked ubiquitination (GO:0070979)	27	0.018164	DOWN
Suox	-1.9149	1.42969e-05	0.000333635	DOWN		neuronal ion channel clustering (GO:0045161)	9	0.018199	DOWN
Nr2f6	-2.02728	1.43115e-05	0.000333635	DOWN		positive regulation of autophagy (GO:0010508)	61	0.018419	DOWN
Gm10053	-1.33834	1.46793e-05	0.000341707	DOWN		positive regulation of fatty acid metabolic process (GO:0045923)	17	0.018505	DOWN
Upp1	2.0277	1.49161e-05	0.000346713	UP		cytochrome complex assembly (GO:0017004)	10	0.018757	DOWN
Cd81	-1.29871	1.50815e-05	0.000350044	DOWN		negative regulation of transferase activity (GO:0051348)	27	0.018757	DOWN
Siglece	2.71951	1.51699e-05	0.000351583	UP		negative regulation of ATP metabolic process (GO:1903579)	12	0.018978	DOWN
Tppp3	-2.09154	1.52759e-05	0.000353524	DOWN		positive regulation of cell motility (GO:2000147)	167	0.019189	UP
Klhl24	-1.22537	1.53605e-05	0.000354965	DOWN		regulation of hematopoietic stem cell differentiation (GO:1902036)	74	0.019247	DOWN
Ncf2	1.89207	1.54045e-05	0.000355467	UP		regulation of NADP metabolic process (GO:1902031)	6	0.019375	DOWN
Alas1	-1.52427	1.55274e-05	0.000357353	DOWN		organophosphate ester transport (GO:0015748)	23	0.019482	DOWN
Ppm1l	-1.55263	1.55312e-05	0.000357353	DOWN		negative regulation of toll-like receptor signaling pathway (GO:0034122)	28	0.019577	UP
Fblim1	-1.74686	1.59022e-05	0.0003651	DOWN		mitochondrial calcium ion homeostasis (GO:0051560)	17	0.020091	DOWN
Errfi1	1.78289	1.59138e-05	0.0003651	UP		negative regulation of cAMP-mediated signaling (GO:0043951)	6	0.020254	DOWN
Got1	-1.45962	1.59647e-05	0.000365341	DOWN		transmembrane transport (GO:0055085)	354	0.020438	DOWN
D2hgdh	-1.63367	1.59703e-05	0.000365341	DOWN		chaperone-mediated protein complex assembly (GO:0051131)	17	0.020624	DOWN
Isoc2a	-1.71721	1.60475e-05	0.00036658	DOWN		regulation of T cell mediated immunity (GO:0002709)	7	0.020781	UP
Adamts9	1.6374	1.66291e-05	0.000379321	UP		positive regulation of T cell differentiation in thymus (GO:0033089)	6	0.0208	UP
Fam174b	-1.45555	1.67177e-05	0.000380794	DOWN		DNA metabolic process (GO:0006259)	302	0.020978	DOWN
0610012G03Rik	-1.74328	1.68062e-05	0.000382263	DOWN		positive regulation of mitochondrion organization (GO:0010822)	120	0.021067	DOWN
Creg1	-1.41522	1.68525e-05	0.000382768	DOWN		actin crosslink formation (GO:0051764)	9	0.021072	UP
Ckm	-1.50443	1.70556e-05	0.000386636	DOWN		integrin-mediated signaling pathway (GO:0007229)	57	0.021072	UP
Scd4	2.10223	1.70714e-05	0.000386636	UP		T-helper cell lineage commitment (GO:0002295)	8	0.021072	UP
Suclg1	-1.34379	1.72263e-05	0.000389589	DOWN		postreplication repair (GO:0006301)	44	0.02123	DOWN
Tmem59	-2.66975	1.74602e-05	0.000394317	DOWN		regulation of glucose import in response to insulin stimulus (GO:2001273)	12	0.02123	DOWN
Prdx2	-1.40481	1.75977e-05	0.00039686	DOWN		endosome transport via multivesicular body sorting pathway (GO:0032509)	12	0.02123	DOWN
Stx11	2.05961	1.77853e-05	0.000400521	UP		purine ribonucleotide metabolic process (GO:0009150)	61	0.021445	DOWN
Tln2	-1.41638	1.78656e-05	0.00040176	DOWN		regulation of endothelial cell apoptotic process (GO:2000351)	33	0.02154	UP
Sycp2	4.03228	1.7892e-05	0.000401785	UP		late endosome to vacuole transport via multivesicular body sorting pathway (GO:0032511)	8	0.022022	DOWN
Psat1	2.25834	1.82165e-05	0.000408209	UP		positive regulation of ATPase activity (GO:0032781)	35	0.022022	DOWN
Wdr43	1.54387	1.82293e-05	0.000408209	UP		citrate metabolic process (GO:0006101)	6	0.022022	DOWN
Grsf1	-1.45763	1.82971e-05	0.000408901	DOWN		NADH metabolic process (GO:0006734)	6	0.022022	DOWN
Rhoh	3.03452	1.83117e-05	0.000408901	UP		vesicle targeting, rough ER to cis-Golgi (GO:0048207)	60	0.022128	DOWN
Rnf149	2.04145	1.84125e-05	0.000410488	UP		vesicle coating (GO:0006901)	60	0.022128	DOWN
Clec4e	4.29668	1.84344e-05	0.000410488	UP		COPII vesicle coating (GO:0048208)	60	0.022128	DOWN
Itgb1bp2	-1.32515	1.88105e-05	0.000418278	DOWN		B cell activation (GO:0042113)	65	0.02221	UP
Emc9	-2.33064	1.88771e-05	0.000419158	DOWN		macrophage activation (GO:0042116)	16	0.022457	UP
Isca1	-1.32815	1.89081e-05	0.000419158	DOWN		secretory granule organization (GO:0033363)	9	0.022491	UP
Bzw2	-1.36805	1.89292e-05	0.000419158	DOWN		positive regulation of TORC1 signaling (GO:1904263)	8	0.022505	DOWN
Optn	-1.44766	1.93222e-05	0.000427266	DOWN		positive regulation of phosphatidylinositol 3-kinase signaling (GO:0014068)	50	0.022569	UP
Pygm	-1.67606	1.9528e-05	0.000431216	DOWN		regulation of granulocyte macrophage colony-stimulating factor production (GO:0032645)	12	0.022584	UP
Pfkp	1.42164	1.9559e-05	0.000431301	UP		response to nicotine (GO:0035094)	21	0.022584	UP
Map3k4	-1.64609	2.00939e-05	0.000442467	DOWN		hematopoietic progenitor cell differentiation (GO:0002244)	22	0.022634	UP
Enah	1.37041	2.01282e-05	0.000442467	UP		mannose metabolic process (GO:0006013)	7	0.02282	DOWN
Cpxm2	-1.87528	2.01687e-05	0.000442467	DOWN		monocarboxylic acid catabolic process (GO:0072329)	22	0.02299	DOWN
Mccc2	-1.57172	2.01766e-05	0.000442467	DOWN		positive regulation of vascular endothelial growth factor production (GO:0010575)	23	0.022993	UP
Hspa4l	-1.42341	2.03019e-05	0.000444131	DOWN		leucine metabolic process (GO:0006551)	7	0.023554	DOWN
Inppl1	-1.6354	2.03084e-05	0.000444131	DOWN		regulation of transcription from RNA polymerase I promoter (GO:0006356)	17	0.023574	UP
Pdhb	-1.23985	2.03461e-05	0.000444345	DOWN		nuclear-transcribed mRNA catabolic process (GO:0000956)	166	0.023587	DOWN
Cyp4f18	2.92672	2.057e-05	0.000448618	UP		calcium ion import (GO:0070509)	28	0.023704	DOWN
Csf2	7.43484	2.06824e-05	0.00045045	UP		mitochondrion morphogenesis (GO:0070584)	9	0.023768	DOWN
Slc29a1	-1.52996	2.08352e-05	0.000453157	DOWN		regulation of cellular metabolic process (GO:0031323)	40	0.023771	DOWN
Cxcl10	5.55769	2.11155e-05	0.000458628	UP		coenzyme A metabolic process (GO:0015936)	10	0.023771	DOWN
Tiparp	1.5952	2.11974e-05	0.000459541	UP		lytic vacuole organization (GO:0080171)	28	0.023847	DOWN
Vmn2r117	2.85245	2.12154e-05	0.000459541	UP		positive regulation of peptidyl-tyrosine phosphorylation (GO:0050731)	107	0.024205	UP
Hbb-bt	-1.75137	2.13864e-05	0.000462518	DOWN		positive regulation of macroautophagy (GO:0016239)	40	0.024258	DOWN
Pxmp2	-1.67144	2.1411e-05	0.000462518	DOWN		phosphatidic acid metabolic process (GO:0046473)	39	0.024269	DOWN
Stc1	2.30803	2.16742e-05	0.000466956	UP		peptidyl-serine phosphorylation (GO:0018105)	142	0.024322	DOWN
Krt222	-2.29092	2.16792e-05	0.000466956	DOWN		alpha-amino acid catabolic process (GO:1901606)	39	0.024624	DOWN
B430306N03Rik	2.97926	2.17045e-05	0.000466956	UP		ventricular cardiac muscle tissue development (GO:0003229)	21	0.024624	DOWN
Spr	-1.86435	2.17475e-05	0.000467247	DOWN		positive regulation of viral process (GO:0048524)	38	0.024624	DOWN
Phtf2	-1.39809	2.17928e-05	0.000467589	DOWN		potassium ion export (GO:0071435)	8	0.024624	DOWN
Acad12	-1.42595	2.18399e-05	0.000467968	DOWN		regulation of stem cell differentiation (GO:2000736)	86	0.024624	DOWN
Pank4	-1.67012	2.20466e-05	0.000471761	DOWN		activation of protein kinase A activity (GO:0034199)	15	0.024624	DOWN
Creld1	-2.16432	2.2385e-05	0.00047836	DOWN		glucan biosynthetic process (GO:0009250)	16	0.024647	DOWN
Kcnj5	-1.80688	2.24865e-05	0.000479884	DOWN		glycogen biosynthetic process (GO:0005978)	16	0.024647	DOWN
Coq3	-1.55837	2.27586e-05	0.000485038	DOWN		anoikis (GO:0043276)	9	0.024647	DOWN
Scn4a	-1.80729	2.27923e-05	0.000485107	DOWN		cellular glucan metabolic process (GO:0006073)	12	0.024738	DOWN
Casp8	1.89579	2.31778e-05	0.000492481	UP		positive regulation of STAT cascade (GO:1904894)	14	0.024781	UP
Dmac2	-1.93671	2.32007e-05	0.000492481	DOWN		positive regulation of cellular response to insulin stimulus (GO:1900078)	13	0.024938	DOWN
Cox8b	-1.30605	2.32826e-05	0.00049356	DOWN		microtubule anchoring (GO:0034453)	11	0.024938	DOWN
Olfr1380	3.53249	2.33246e-05	0.000493791	UP		fructose 1,6-bisphosphate metabolic process (GO:0030388)	7	0.025609	DOWN
Car14	-1.46225	2.35058e-05	0.000496922	DOWN		interleukin-6-mediated signaling pathway (GO:0070102)	13	0.025723	UP
Zfyve21	-2.12624	2.35349e-05	0.000496922	DOWN		regulation of adenylate cyclase activity (GO:0045761)	23	0.025882	UP
Actn1	1.72034	2.39159e-05	0.000504296	UP		chaperone-mediated protein transport (GO:0072321)	9	0.026053	DOWN
Cpt2	-1.31067	2.45233e-05	0.000516418	DOWN		RNA splicing, via transesterification reactions with bulged adenosine as nucleophile (GO:0000377)	232	0.026325	DOWN
As3mt	-1.57607	2.45575e-05	0.000516454	DOWN		T cell activation involved in immune response (GO:0002286)	18	0.026374	UP
Adssl1	-1.80122	2.46515e-05	0.000517748	DOWN		regulation of interleukin-23 production (GO:0032667)	7	0.026374	UP
Kyat1	-1.99089	2.48691e-05	0.000521628	DOWN		oxaloacetate metabolic process (GO:0006107)	7	0.026561	DOWN
Abcb6	-2.29602	2.49162e-05	0.000521911	DOWN		GPI anchor biosynthetic process (GO:0006506)	31	0.026584	DOWN
Chd7	1.75122	2.49488e-05	0.000521911	UP		PERK-mediated unfolded protein response (GO:0036499)	11	0.026734	UP
Phyhip	-2.33753	2.49811e-05	0.000521911	DOWN		positive regulation of response to stimulus (GO:0048584)	51	0.026751	UP
Ddx3x	1.23026	2.51781e-05	0.000525336	UP		endosome organization (GO:0007032)	33	0.026926	DOWN
Tgfbi	1.70462	2.55035e-05	0.000531429	UP		regulation of antigen receptor-mediated signaling pathway (GO:0050854)	12	0.026961	UP
D10Wsu102e	1.94261	2.55501e-05	0.000531704	UP		positive regulation of cell migration (GO:0030335)	209	0.026961	UP
Malt1	2.00038	2.56264e-05	0.000531823	UP		modification by symbiont of host morphology or physiology (GO:0044003)	5	0.027044	DOWN
Gtf2i	-1.5101	2.56287e-05	0.000531823	DOWN		ER-associated misfolded protein catabolic process (GO:0071712)	13	0.027044	DOWN
Rprd1a	-1.53113	2.56562e-05	0.000531823	DOWN		positive regulation of transcription from RNA polymerase II promoter (GO:0045944)	793	0.027475	UP
Neo1	-1.43348	2.57985e-05	0.000534077	DOWN		toll-like receptor 4 signaling pathway (GO:0034142)	14	0.027567	UP
Slc25a3	-1.48307	2.60453e-05	0.000538484	DOWN		viral transcription (GO:0019083)	109	0.0276	DOWN
Pdss2	-1.9614	2.62297e-05	0.000541066	DOWN		regulation of dopamine metabolic process (GO:0042053)	5	0.0278	UP
Abca9	-1.62805	2.62383e-05	0.000541066	DOWN		second-messenger-mediated signaling (GO:0019932)	57	0.027821	UP
Cyhr1	-1.56638	2.63547e-05	0.000542763	DOWN		peptidyl-asparagine modification (GO:0018196)	44	0.027823	DOWN
Lrrc4b	-2.59625	2.64767e-05	0.00054457	DOWN		positive regulation of cytosolic calcium ion concentration (GO:0007204)	122	0.028086	UP
Cd52	2.16007	2.6884e-05	0.000552234	UP		protein localization to mitochondrion (GO:0070585)	9	0.02819	DOWN
Mlec	-1.42801	2.69507e-05	0.000552889	DOWN		axonal transport (GO:0098930)	35	0.02819	DOWN
Selenop	-1.25519	2.70339e-05	0.000553882	DOWN		negative regulation by host of viral transcription (GO:0043922)	11	0.028394	UP
Tmem14c	-1.83341	2.71125e-05	0.000554777	DOWN		positive regulation of ERK1 and ERK2 cascade (GO:0070374)	180	0.028471	UP
Speg	-1.628	2.75244e-05	0.000562481	DOWN		Golgi vesicle budding (GO:0048194)	9	0.028506	DOWN
Olfr1336	2.41027	2.75992e-05	0.000563285	UP		myeloid leukocyte differentiation (GO:0002573)	48	0.028548	UP
Apln	2.04354	2.78298e-05	0.000566567	UP		negative regulation of potassium ion transmembrane transport (GO:1901380)	8	0.028742	DOWN
Pram1	4.31149	2.78312e-05	0.000566567	UP		negative regulation of ERAD pathway (GO:1904293)	12	0.028743	DOWN
Casq2	-1.16573	2.80281e-05	0.000569845	DOWN		post-Golgi vesicle-mediated transport (GO:0006892)	52	0.028759	DOWN
Hrc	-1.31635	2.81243e-05	0.000571071	DOWN		nucleotide-excision repair, DNA incision, 3 -to lesion (GO:0006295)	21	0.028832	DOWN
Tarbp2	-2.05973	2.83002e-05	0.000573908	DOWN		carnitine metabolic process (GO:0009437)	11	0.028832	DOWN
Polrmt	-2.46732	2.87431e-05	0.000581815	DOWN		nucleotide-excision repair, preincision complex stabilization (GO:0006293)	21	0.028832	DOWN
Gpd1l	-1.40883	2.87633e-05	0.000581815	DOWN		cilium movement (GO:0003341)	45	0.028847	UP
Bcat2	-1.7308	2.89594e-05	0.000584649	DOWN		regulation of establishment of protein localization to mitochondrion (GO:1903747)	8	0.028929	DOWN
Vmn1r75	3.1363	2.89769e-05	0.000584649	UP		aspartate family amino acid metabolic process (GO:0009066)	10	0.029064	DOWN
B4gat1	-2.03403	2.92487e-05	0.000589385	DOWN		nucleoside triphosphate metabolic process (GO:0009141)	14	0.029518	DOWN
Paqr9	-1.54177	2.95056e-05	0.000593809	DOWN		snRNA transcription (GO:0009301)	69	0.029758	DOWN
Heatr5b	-1.48383	2.96133e-05	0.000595223	DOWN		acyl-CoA biosynthetic process (GO:0071616)	10	0.029758	DOWN
Epha5	2.95823	2.96676e-05	0.000595562	UP		snRNA transcription from RNA polymerase II promoter (GO:0042795)	69	0.029758	DOWN
Ldhb	-1.38007	3.03477e-05	0.000607921	DOWN		nuclear-transcribed mRNA catabolic process, nonsense-mediated decay (GO:0000184)	110	0.029835	DOWN
Itgb2	1.57062	3.03597e-05	0.000607921	UP		T cell proliferation (GO:0042098)	8	0.029888	UP
Mcam	1.43019	3.05385e-05	0.000610731	UP		regulation of interleukin-4 production (GO:0032673)	14	0.029927	UP
Abcc9	-1.25518	3.12372e-05	0.000623413	DOWN		protein targeting to lysosome (GO:0006622)	17	0.030272	DOWN
Prepl	-1.37892	3.1251e-05	0.000623413	DOWN		response to endoplasmic reticulum stress (GO:0034976)	102	0.030292	DOWN
Mgst3	-1.2782	3.18691e-05	0.000634945	DOWN		coenzyme A biosynthetic process (GO:0015937)	7	0.030464	DOWN
2310061I04Rik	-1.64718	3.20176e-05	0.000635723	DOWN		purine nucleoside bisphosphate biosynthetic process (GO:0034033)	7	0.030464	DOWN
Gm8113	-1.38718	3.20435e-05	0.000635723	DOWN		ribonucleoside bisphosphate biosynthetic process (GO:0034030)	7	0.030464	DOWN
Cpt1b	-1.34112	3.20585e-05	0.000635723	DOWN		regulation of microglial cell activation (GO:1903978)	6	0.030656	UP
Doc2g	-1.58721	3.2068e-05	0.000635723	DOWN		toll-like receptor signaling pathway (GO:0002224)	80	0.030656	UP
Dcaf11	-1.49059	3.2438e-05	0.000642256	DOWN		GPI anchor metabolic process (GO:0006505)	24	0.030871	DOWN
Slc38a2	1.20824	3.25078e-05	0.000642838	UP		regulation of cardiac muscle cell apoptotic process (GO:0010665)	6	0.030922	DOWN
Acaa2	-1.1552	3.27471e-05	0.000646766	DOWN		nucleotide biosynthetic process (GO:0009165)	23	0.030922	DOWN
Plod1	-1.63444	3.32617e-05	0.000656115	DOWN		chemical synaptic transmission (GO:0007268)	261	0.031065	UP
Nrg1	3.20088	3.35724e-05	0.000661422	UP		regulation of epidermal cell differentiation (GO:0045604)	19	0.031065	UP
Pdk4	1.51066	3.36209e-05	0.000661558	UP		membrane fusion (GO:0061025)	47	0.031104	DOWN
Lrpprc	-1.24162	3.41171e-05	0.000670492	DOWN		calcium-dependent cell-cell adhesion via plasma membrane cell adhesion molecules (GO:0016339)	40	0.031141	UP
Olfr667	2.67051	3.44856e-05	0.000676759	UP		regulation of collagen biosynthetic process (GO:0032965)	17	0.031183	UP
Atp5o	-1.17039	3.45211e-05	0.000676759	DOWN		positive regulation of epithelial cell differentiation involved in kidney development (GO:2000698)	6	0.031183	UP
Olfr1310	2.84589	3.45677e-05	0.000676837	UP		regulation of phagocytosis (GO:0050764)	35	0.031656	UP
Cpeb3	-1.43087	3.46448e-05	0.000677513	DOWN		anterograde trans-synaptic signaling (GO:0098916)	219	0.031656	UP
Usp17la	3.00305	3.4706e-05	0.000677875	UP		positive regulation of B cell activation (GO:0050871)	42	0.031656	UP
Fars2	-1.71619	3.48853e-05	0.000680542	DOWN		positive regulation of interleukin-4 production (GO:0032753)	14	0.032077	UP
Ung	-2.56632	3.49922e-05	0.00068179	DOWN		positive regulation of protein phosphorylation (GO:0001934)	386	0.032077	UP
Mrpl39	-1.55695	3.52076e-05	0.000685148	DOWN		peptide cross-linking (GO:0018149)	37	0.032077	UP
Zfp457	3.19586	3.58963e-05	0.000697697	UP		regulation of adaptive immune response (GO:0002819)	14	0.032233	UP
Ndufs3	-1.48672	3.5948e-05	0.000697848	DOWN		phosphatidylinositol metabolic process (GO:0046488)	106	0.033257	DOWN
Fkrp	-1.9373	3.60732e-05	0.000699424	DOWN		endoplasmic reticulum mannose trimming (GO:1904380)	18	0.033269	DOWN
Rbm20	-1.43835	3.61992e-05	0.000701013	DOWN		nucleotide-excision repair, DNA duplex unwinding (GO:0000717)	22	0.0334	DOWN
Ptprc	1.49159	3.63811e-05	0.000703678	UP		protein ADP-ribosylation (GO:0006471)	18	0.0334	DOWN
C5ar1	1.75406	3.67383e-05	0.000709724	UP		cell morphogenesis (GO:0000902)	58	0.033549	UP
B3gnt5	3.68866	3.69224e-05	0.000712414	UP		protein localization to cell periphery (GO:1990778)	114	0.033754	DOWN
Sesn1	-1.37692	3.71729e-05	0.000716378	DOWN		regulation of pathway-restricted SMAD protein phosphorylation (GO:0060393)	58	0.033983	UP
Eci1	-1.6445	3.72597e-05	0.000717182	DOWN		regulation of cytosolic calcium ion concentration (GO:0051480)	125	0.034027	UP
Gaa	-1.51555	3.75151e-05	0.000721225	DOWN		regulation of muscle contraction (GO:0006937)	25	0.034275	DOWN
Prob1	-1.74399	3.7746e-05	0.000724787	DOWN		positive regulation of cell migration involved in sprouting angiogenesis (GO:0090050)	16	0.034448	UP
Ccnb1ip1	-1.21738	3.79439e-05	0.000727709	DOWN		positive regulation of protein secretion (GO:0050714)	75	0.034483	UP
Cd9	1.57365	3.81593e-05	0.000730957	UP		regulation of biosynthetic process (GO:0009889)	6	0.034799	DOWN
Gna12	-1.65878	3.84225e-05	0.000735114	DOWN		collagen metabolic process (GO:0032963)	12	0.034887	DOWN
Entpd5	-1.34756	3.85728e-05	0.000737102	DOWN		regulation of energy homeostasis (GO:2000505)	16	0.034887	DOWN
Vdac3	-1.19643	3.8725e-05	0.000739121	DOWN		positive regulation of phospholipase C activity (GO:0010863)	30	0.035032	UP
AL731706.1	-1.83041	3.90377e-05	0.000744198	DOWN		endodermal cell differentiation (GO:0035987)	32	0.035408	UP
Fem1a	-1.39706	3.94832e-05	0.000751464	DOWN		myeloid cell differentiation (GO:0030099)	42	0.03564	UP
Cox7a1	-1.24473	3.95517e-05	0.000751464	DOWN		cellular response to interleukin-6 (GO:0071354)	22	0.035694	UP
Rassf3	-1.52841	3.95653e-05	0.000751464	DOWN		positive regulation of blood vessel diameter (GO:0097755)	13	0.035865	UP
Mrpl38	-1.71435	3.96079e-05	0.000751464	DOWN		B cell homeostasis (GO:0001782)	9	0.035897	UP
Trim30b	2.65508	3.97468e-05	0.000753199	UP		protein deubiquitination (GO:0016579)	249	0.035929	DOWN
Cxcr4	2.13808	3.99283e-05	0.000755738	UP		negative regulation of interferon-gamma production (GO:0032689)	18	0.036009	UP
Xirp1	1.61126	4.02173e-05	0.000760304	UP		peptidyl-lysine deacetylation (GO:0034983)	7	0.036385	DOWN
Smim20	-1.74744	4.04531e-05	0.000763852	DOWN		positive regulation of T cell mediated immunity (GO:0002711)	20	0.036558	UP
Atp5g1	-1.3078	4.07245e-05	0.000768064	DOWN		epidermis development (GO:0008544)	70	0.036728	UP
Tmed5	1.44931	4.11458e-05	0.00077509	UP		fructose metabolic process (GO:0006000)	6	0.037033	DOWN
Ifitm1	2.25174	4.13337e-05	0.00077771	UP		viral gene expression (GO:0019080)	106	0.037033	DOWN
Amer2	3.72782	4.145e-05	0.000778975	UP		mitochondrial ribosome assembly (GO:0061668)	6	0.037421	DOWN
Kif1bp	-1.72189	4.17113e-05	0.000782961	DOWN		positive regulation of cellular carbohydrate metabolic process (GO:0010676)	12	0.037633	DOWN
Evi2b	2.72694	4.17855e-05	0.000783428	UP		xenobiotic catabolic process (GO:0042178)	6	0.037786	DOWN
Rbl2	-1.50127	4.24339e-05	0.000793208	DOWN		cellular response to leucine (GO:0071233)	9	0.037786	DOWN
Maob	-1.51277	4.24491e-05	0.000793208	DOWN		response to leucine (GO:0043201)	9	0.037786	DOWN
Serpinh1	-1.27516	4.24567e-05	0.000793208	DOWN		progesterone metabolic process (GO:0042448)	6	0.038464	UP
E2f7	2.62115	4.25754e-05	0.000794492	UP		7-methylguanosine mRNA capping (GO:0006370)	30	0.038594	DOWN
Cdh1	6.08774	4.26804e-05	0.000795517	UP		7-methylguanosine RNA capping (GO:0009452)	30	0.038594	DOWN
Sirpb1b	3.80502	4.2856e-05	0.000797854	UP		positive regulation of stress-activated protein kinase signaling cascade (GO:0070304)	14	0.038649	UP
Il6ra	1.86155	4.3069e-05	0.000800289	UP		regulation of ATP biosynthetic process (GO:2001169)	8	0.038976	DOWN
Abcb10	-1.57728	4.30874e-05	0.000800289	DOWN		global genome nucleotide-excision repair (GO:0070911)	32	0.039203	DOWN
C3ar1	1.62418	4.31647e-05	0.000800789	UP		plasma membrane bounded cell projection assembly (GO:0120031)	214	0.039203	DOWN
Mlf1	-1.46049	4.33522e-05	0.000803329	DOWN		cardiac muscle cell contraction (GO:0086003)	17	0.039716	DOWN
Ap1s3	2.10591	4.34819e-05	0.000804794	UP		positive regulation of lymphocyte migration (GO:2000403)	16	0.039921	UP
Macrod1	-1.72061	4.35595e-05	0.000805294	DOWN		regulation of cellular component movement (GO:0051270)	45	0.040091	UP
Lamtor3	-1.52808	4.41936e-05	0.000816067	DOWN		mature B cell differentiation involved in immune response (GO:0002313)	9	0.040224	UP
Atp5d	-1.64859	4.4283e-05	0.000816769	DOWN		dendritic spine morphogenesis (GO:0060997)	15	0.040224	UP
Trmt5	-1.8009	4.45358e-05	0.000820481	DOWN		regulation of hormone biosynthetic process (GO:0046885)	7	0.040224	UP
Cap2	-1.2558	4.51962e-05	0.000831569	DOWN		negative regulation of protein phosphorylation (GO:0001933)	172	0.040589	DOWN
P4ha2	-1.72344	4.52423e-05	0.000831569	DOWN		positive regulation of peptidase activity (GO:0010952)	11	0.040869	DOWN
Taz	-1.70073	4.54691e-05	0.000834772	DOWN		telomere maintenance (GO:0000723)	45	0.040869	DOWN
Ppif	-1.41639	4.55881e-05	0.000835992	DOWN		dicarboxylic acid catabolic process (GO:0043649)	12	0.041096	DOWN
Cnst	-1.42134	4.56561e-05	0.000836274	DOWN		negative regulation of release of cytochrome c from mitochondria (GO:0090201)	15	0.041096	DOWN
Tgif1	2.5993	4.59747e-05	0.000841141	UP		protein localization to Golgi apparatus (GO:0034067)	22	0.041151	DOWN
Vmn2r4	2.89589	4.61482e-05	0.000843344	UP		bile acid metabolic process (GO:0008206)	27	0.041266	DOWN
Naa16	2.39722	4.6258e-05	0.000844381	UP		regulation of macrophage differentiation (GO:0045649)	13	0.041385	UP
Gm13889	2.6615	4.63697e-05	0.00084545	UP		establishment of protein localization to vacuole (GO:0072666)	21	0.041622	DOWN
Fcer1g	1.82577	4.66139e-05	0.000848929	UP		NIK/NF-kappaB signaling (GO:0038061)	77	0.041622	DOWN
C1s1	-1.57862	4.67141e-05	0.00084978	DOWN		regulation of glucose metabolic process (GO:0010906)	25	0.042238	DOWN
Sdhd	-1.20358	4.72323e-05	0.000858224	DOWN		phosphatidylcholine biosynthetic process (GO:0006656)	32	0.042238	DOWN
Cmbl	-1.93819	4.87893e-05	0.000885503	DOWN		regulation of protein processing (GO:0070613)	54	0.042517	DOWN
Cox4i1	-1.44811	4.88846e-05	0.000886221	DOWN		transferrin transport (GO:0033572)	34	0.043365	DOWN
Gda	1.37909	4.91139e-05	0.000889364	UP		ferric iron transport (GO:0015682)	34	0.043365	DOWN
Olfr718-ps1	2.73264	4.93348e-05	0.000892348	UP		negative regulation of viral genome replication (GO:0045071)	39	0.043479	UP
Runx2	3.25462	4.96803e-05	0.000897577	UP		striated muscle hypertrophy (GO:0014897)	6	0.043483	DOWN
Actg1	1.50482	4.97563e-05	0.000897884	UP		regulation of sodium ion transport (GO:0002028)	35	0.043753	DOWN
Olfr552	2.633	4.98103e-05	0.000897884	UP		peptidyl-proline modification (GO:0018208)	33	0.043869	DOWN
Pkia	-1.25677	4.99977e-05	0.000899805	DOWN		plus-end-directed organelle transport along microtubule (GO:0072386)	6	0.043869	DOWN
Nras	1.44443	5.003e-05	0.000899805	UP		regulation of MAP kinase activity (GO:0043405)	83	0.043916	UP
Tmed4	-1.45627	5.03828e-05	0.000904184	DOWN		negative regulation of cytokine-mediated signaling pathway (GO:0001960)	33	0.043916	UP
Mt1	1.58902	5.03873e-05	0.000904184	UP		arginine metabolic process (GO:0006525)	11	0.044022	UP
Col14a1	-1.81846	5.08049e-05	0.000910261	DOWN		cellular response to nitrogen levels (GO:0043562)	9	0.04406	DOWN
Smarcd3	-2.00839	5.08902e-05	0.000910261	DOWN		cellular response to nitrogen starvation (GO:0006995)	9	0.04406	DOWN
Mmp19	1.75155	5.08977e-05	0.000910261	UP		renal water homeostasis (GO:0003091)	27	0.044378	DOWN
Ecscr	1.90447	5.10359e-05	0.000911707	UP		mesodermal cell differentiation (GO:0048333)	9	0.044757	UP
Ccdc141	-1.31528	5.12562e-05	0.000914403	DOWN		amide biosynthetic process (GO:0043604)	43	0.044886	UP
Tspyl4	-1.77811	5.13018e-05	0.000914403	DOWN		protein alpha-1,2-demannosylation (GO:0036508)	22	0.045145	DOWN
Tyms	2.27432	5.14005e-05	0.000915136	UP		B cell differentiation (GO:0030183)	46	0.045349	UP
Mlycd	-1.59205	5.16741e-05	0.000918979	DOWN		regulation of cell communication by electrical coupling (GO:0010649)	12	0.045774	DOWN
Ankrd40	-1.58889	5.19249e-05	0.000922407	DOWN		protein deacylation (GO:0035601)	16	0.045933	DOWN
Asns	2.24219	5.22276e-05	0.000926748	UP		cardiac ventricle morphogenesis (GO:0003208)	43	0.045984	DOWN
Slco2a1	2.32806	5.27067e-05	0.000934207	UP		late endosome to vacuole transport (GO:0045324)	7	0.046288	DOWN
Ngf	2.5228	5.284e-05	0.000935528	UP		positive regulation of heart rate (GO:0010460)	14	0.046686	DOWN
Cisd1	-1.4189	5.36016e-05	0.000947955	DOWN		positive regulation of T-helper cell differentiation (GO:0045624)	11	0.046686	UP
Flad1	-1.65234	5.38927e-05	0.000952045	DOWN		positive regulation of phagocytosis (GO:0050766)	34	0.047819	UP
Dhrs11	-1.76605	5.39972e-05	0.000952832	DOWN		receptor internalization (GO:0031623)	47	0.047869	UP
Atp5f1	-1.39845	5.48198e-05	0.000966274	DOWN		purine nucleoside monophosphate biosynthetic process (GO:0009127)	12	0.048132	DOWN
Flcn	-1.72905	5.50192e-05	0.000968716	DOWN		cellular response to mechanical stimulus (GO:0071260)	46	0.048317	UP
Mrpl4	-1.57052	5.51301e-05	0.000969594	DOWN		peptidyl-tyrosine autophosphorylation (GO:0038083)	45	0.048509	UP
Rlim	1.2284	5.59646e-05	0.000983184	UP		negative regulation of RNA metabolic process (GO:0051253)	14	0.048509	UP
Chchd3	-1.15188	5.63649e-05	0.000989123	DOWN		positive regulation of tumor necrosis factor superfamily cytokine production (GO:1903557)	31	0.048594	UP
Vmn2r95	3.10855	5.69756e-05	0.000998737	UP		negative regulation of response to interferon-gamma (GO:0060331)	6	0.049303	UP
Cacna1d	2.85369	5.70815e-05	0.000999106	UP		negative regulation of interferon-gamma-mediated signaling pathway (GO:0060336)	6	0.049303	UP
Naip2	2.07116	5.71223e-05	0.000999106	UP		short-chain fatty acid metabolic process (GO:0046459)	8	0.049326	DOWN
Prokr2	2.79856	5.74384e-05	0.00100353	UP		cellular macromolecule catabolic process (GO:0044265)	42	0.049434	DOWN
Klhl23	-1.68746	5.76801e-05	0.00100665	DOWN		GDP-mannose metabolic process (GO:0019673)	6	0.049434	DOWN
Extl1	-2.16566	5.78249e-05	0.00100805	DOWN		guanosine-containing compound metabolic process (GO:1901068)	16	0.049434	DOWN
Adra1b	-2.11216	5.78872e-05	0.00100805	DOWN		positive regulation of protein localization to cell surface (GO:2000010)	7	0.049868	DOWN
Dnajb2	-1.56228	5.84159e-05	0.00101521	DOWN
Klc4	-1.73672	5.84262e-05	0.00101521	DOWN
Rab12	-1.40849	5.86415e-05	0.00101784	DOWN
Fbxo31	-1.87607	5.97656e-05	0.00103622	DOWN
Sec14l1	-1.49563	5.99456e-05	0.00103821	DOWN
Mrpl44	-1.64986	6.06379e-05	0.00104906	DOWN
Mrps9	-1.41863	6.15973e-05	0.0010645	DOWN
Mak16	1.65123	6.17923e-05	0.00106671	UP
S1pr3	1.62271	6.18808e-05	0.00106705	UP
Scn4b	-1.67334	6.19463e-05	0.00106705	DOWN
Ndufb5	-1.21152	6.22484e-05	0.00107012	DOWN
Slpi	2.59081	6.22594e-05	0.00107012	UP
C130026I21Rik	3.78735	6.23733e-05	0.00107092	UP
Tfec	3.96965	6.32485e-05	0.00108478	UP
Pdrg1	-1.46285	6.34013e-05	0.00108622	DOWN
Vmn1r85	2.98947	6.3498e-05	0.00108671	UP
Fmc1	-1.74286	6.36106e-05	0.00108747	DOWN
Ahsa1	-1.36869	6.41172e-05	0.00109495	DOWN
Parp1	-1.5064	6.48967e-05	0.00110597	DOWN
Rasl11b	2.08645	6.49013e-05	0.00110597	UP
Amacr	-1.72739	6.49903e-05	0.0011063	DOWN
Fxyd1	-1.27694	6.5235e-05	0.00110927	DOWN
Vmn1r188	3.24096	6.53577e-05	0.00111017	UP
Tnfrsf9	3.82964	6.54978e-05	0.00111136	UP
Duxf3	4.6468	6.56764e-05	0.00111321	UP
Cpox	-1.58538	6.57621e-05	0.00111347	DOWN
Smdt1	-1.61485	6.61281e-05	0.00111848	DOWN
Vmn2r24	2.43576	6.75157e-05	0.00113978	UP
Cog4	-1.33382	6.75307e-05	0.00113978	DOWN
Kcnn1	-2.19765	6.92517e-05	0.00116656	DOWN
Acads	-1.64799	6.92644e-05	0.00116656	DOWN
Tmem50b	-1.54178	6.95721e-05	0.00117051	DOWN
Asph	-1.17878	7.0926e-05	0.00119202	DOWN
Rnaset2b	-1.44325	7.1064e-05	0.00119308	DOWN
Slc7a5	2.35336	7.11997e-05	0.0011941	UP
Gpx4	-1.23517	7.17628e-05	0.00120227	DOWN
Pcp4l1	-1.64934	7.23369e-05	0.00121062	DOWN
Klhl21	-1.7645	7.29715e-05	0.00121995	DOWN
Ptafr	1.91674	7.31288e-05	0.0012213	UP
Tmem63b	-1.83246	7.35023e-05	0.00122625	DOWN
Reep1	-2.05228	7.46362e-05	0.00124386	DOWN
Cox8a	-1.3253	7.49504e-05	0.00124779	DOWN
Tcea3	-1.81771	7.57704e-05	0.00126012	DOWN
Urod	-1.54051	7.73166e-05	0.00128449	DOWN
Smarcal1	-1.80268	7.75177e-05	0.00128649	DOWN
Htr2a	2.93574	7.80141e-05	0.00129337	UP
Arpc5l	-1.62365	7.83614e-05	0.00129778	DOWN
Pdhx	-1.20712	7.84593e-05	0.00129805	DOWN
Nfix	-1.54876	8.09766e-05	0.0013383	DOWN
Pex10	-2.62312	8.12095e-05	0.00134076	DOWN
Treml2	3.235	8.16002e-05	0.00134499	UP
Pkdcc	-2.15568	8.1635e-05	0.00134499	DOWN
Arid3a	2.4125	8.17641e-05	0.00134572	UP
Mrpl45	-1.37119	8.2819e-05	0.00136167	DOWN
Ptpn2	1.51686	8.29944e-05	0.00136315	UP
Slc10a6	1.86325	8.31469e-05	0.00136424	UP
Rai2	-1.82653	8.3853e-05	0.00137441	DOWN
Vmn1r46	2.16057	8.51077e-05	0.00139354	UP
Spint1	7.06286	8.56338e-05	0.00140071	UP
Smco1	-2.28202	8.62194e-05	0.00140884	DOWN
Tmem246	-1.51191	8.67581e-05	0.00141619	DOWN
Olfr365	2.43753	8.76009e-05	0.00142848	UP
Apbb1	-1.32841	8.7985e-05	0.00143327	DOWN
Dlst	-1.32833	8.81756e-05	0.00143459	DOWN
Slc25a19	-2.05804	8.82465e-05	0.00143459	DOWN
Fcrlb	5.3498	8.83591e-05	0.00143496	UP
Ndufb11	-1.14195	8.88413e-05	0.00144131	DOWN
Arhgef19	-2.48215	8.97655e-05	0.00145478	DOWN
Kcnj2	-1.34433	8.98838e-05	0.00145478	DOWN
Tmem205	-1.66087	8.99461e-05	0.00145478	DOWN
Prkaa2	-1.16863	9.05325e-05	0.00146278	DOWN
Fam78a	-2.54996	9.07744e-05	0.0014652	DOWN
Adss	1.72364	9.109e-05	0.0014688	UP
Resf1	1.20062	9.12221e-05	0.00146944	UP
Olfr607	2.38356	9.18803e-05	0.00147855	UP
Thrsp	-1.77277	9.24553e-05	0.0014863	DOWN
Emc10	-1.84392	9.276e-05	0.00148717	DOWN
Kif1c	-1.73688	9.28222e-05	0.00148717	DOWN
Bst1	2.39191	9.28628e-05	0.00148717	UP
Mrps35	-1.49435	9.28838e-05	0.00148717	DOWN
Flna	1.15176	9.41993e-05	0.00150604	UP
Ndufb2	-1.31905	9.4252e-05	0.00150604	DOWN
Lhcgr	2.40387	9.53989e-05	0.00152284	UP
Hspg2	-1.22503	9.57982e-05	0.00152768	DOWN
Smim19	-1.72266	9.60868e-05	0.00153075	DOWN
Vars2	-2.17128	9.63897e-05	0.00153403	DOWN
Sdhc	-1.33479	9.65549e-05	0.00153513	DOWN
Hadh	-1.38505	9.78698e-05	0.00155448	DOWN
Khdrbs2	2.64779	9.90632e-05	0.00157186	UP
Prkaca	-1.52968	9.98949e-05	0.00158348	DOWN
Tmem53	-2.49897	0.000100025	0.00158396	DOWN
Gbp6	-1.84829	0.000100206	0.00158525	DOWN
Nifk	1.47159	0.000100609	0.00159005	UP
Mpi	-1.25728	0.000101265	0.00159881	DOWN
Olfr975	2.95245	0.000101564	0.00160196	UP
Tnf	3.64066	0.000102625	0.00161708	UP
Vmn2r88	2.84403	0.000102979	0.00162029	UP
Auh	-1.3817	0.000103032	0.00162029	DOWN
Adora3	3.46466	0.000103709	0.00162931	UP
Trim63	-1.43966	0.000104263	0.00163641	DOWN
Ppara	-1.69282	0.000104868	0.00164428	DOWN
Rock2	1.15842	0.000105937	0.00165843	UP
Gm21962	3.08726	0.000105979	0.00165843	UP
Olfr204	2.67214	0.000106313	0.00166137	UP
Khdrbs3	-1.62996	0.000106376	0.00166137	DOWN
Klf7	1.52278	0.00010689	0.00166776	UP
Hint2	-1.85355	0.000107158	0.0016703	DOWN
Mpc2	-1.49486	0.000108515	0.0016898	DOWN
Vmn1r38	3.08413	0.00010972	0.00170689	UP
Col6a2	-1.51842	0.000110006	0.00170948	DOWN
Runx1	2.14554	0.00011012	0.00170948	UP
Olfr465-ps1	4.03067	0.000110209	0.00170948	UP
Actb	1.38574	0.000110938	0.00171911	UP
Myh14	-1.70993	0.000111662	0.00172864	DOWN
Atpaf1	-1.55266	0.000112536	0.00174048	DOWN
Ndufc2	-1.22835	0.000113096	0.00174744	DOWN
Lrrc15	-2.47409	0.00011335	0.00174966	DOWN
Slc25a4	-1.12419	0.000113909	0.00175659	DOWN
Ltb4r1	3.64421	0.000114069	0.00175735	UP
Gtpbp4	1.63061	0.000114377	0.00176038	UP
Mapk6	1.45415	0.000114583	0.00176185	UP
Myo18b	-1.44083	0.000115375	0.00177231	DOWN
Abca8a	-1.30256	0.000117267	0.00179964	DOWN
Ndufb8	-1.21494	0.000119044	0.00182516	DOWN
Olfr1312	2.78412	0.000120444	0.00184483	UP
Rhobtb2	-2.10746	0.000121228	0.00185341	DOWN
Slc39a10	1.52274	0.000121237	0.00185341	UP
Dsp	-1.22184	0.000121366	0.0018536	DOWN
Alad	-1.72992	0.000121879	0.00185965	DOWN
Olfr344	2.46264	0.000122412	0.00186485	UP
Dgat2	-1.46048	0.000122532	0.00186485	DOWN
Cbx6	-2.15468	0.000122571	0.00186485	DOWN
Tlr6	2.76778	0.000122706	0.00186511	UP
Clasp2	-1.22081	0.000123109	0.00186945	DOWN
Atp5h	-1.0725	0.000124367	0.00188674	DOWN
Foxo3	-1.28508	0.000125503	0.00190216	DOWN
Olfr624	1.98994	0.00012712	0.00192475	UP
Mlph	3.37857	0.000127235	0.00192475	UP
Ppp1r18	1.67914	0.000127696	0.00192989	UP
Ptcd2	-1.48318	0.000128048	0.00193337	DOWN
Grhpr	-2.07369	0.00012828	0.00193503	DOWN
Ccdc144b	3.87792	0.00012898	0.00194375	UP
Gga1	-2.03116	0.000130659	0.0019657	DOWN
Rtn2	-1.72074	0.000130684	0.0019657	DOWN
Pde7a	-1.40192	0.000130865	0.00196657	DOWN
Gm43302	-7.58635	0.00013152	0.00197347	DOWN
Mib2	-2.25762	0.000131573	0.00197347	DOWN
Uqcrc1	-1.46843	0.000131881	0.00197622	DOWN
Muc5b	4.03278	0.000132133	0.00197814	UP
Ftsj3	1.27847	0.000132431	0.00198074	UP
Ndufb7	-1.28499	0.00013388	0.00200053	DOWN
Pcmtd2	-1.48938	0.000134029	0.00200087	DOWN
Eea1	1.29854	0.000134632	0.00200799	UP
Wsb1	1.72688	0.00013482	0.00200891	UP
Esrrg	-1.48631	0.00013512	0.00201148	DOWN
Dym	-1.5498	0.000135532	0.00201574	DOWN
Vmn1r18	2.35075	0.000135883	0.00201907	UP
Kcnq1	-1.54716	0.000136342	0.002024	DOWN
Ptbp1	1.44549	0.000137185	0.00203461	UP
Tmod1	-1.34226	0.000137796	0.00204178	DOWN
Mettl6	1.7621	0.000138526	0.00205068	UP
Slc16a1	-1.07632	0.000140786	0.00208219	DOWN
D1Ertd622e	1.75489	0.000141145	0.00208557	UP
Nudt3	-1.57162	0.000141328	0.00208632	DOWN
Olfr1118	3.00993	0.000142158	0.00209607	UP
Kmt5a	-1.46523	0.000142325	0.00209607	DOWN
Atp5a1	-1.30475	0.000142454	0.00209607	DOWN
Ptp4a3	-1.40125	0.000142515	0.00209607	DOWN
Micos13	-1.71006	0.00014297	0.00210081	DOWN
Gcdh	-1.40817	0.000144642	0.00212342	DOWN
Dab2	1.31893	0.000145191	0.00212951	UP
Nfkbid	4.17427	0.000145414	0.00213082	UP
Uqcr10	-1.30399	0.000145635	0.00213122	DOWN
Atp5k	-1.20634	0.000145709	0.00213122	DOWN
Txndc15	-1.55296	0.000146613	0.00214246	DOWN
Mrpl2	-1.52905	0.000147405	0.00215205	DOWN
H2afv	-1.92833	0.000148655	0.00216832	DOWN
Mcoln2	3.60946	0.000149063	0.00217228	UP
Bglap3	2.84689	0.00015105	0.00219898	UP
Olfr1221	2.77349	0.000151172	0.00219898	UP
Gstp1	-1.44032	0.000151882	0.00220729	DOWN
Ppfibp2	-1.7152	0.000152764	0.00221592	DOWN
Apip	-1.5934	0.00015289	0.00221592	DOWN
Trak1	-1.33662	0.00015306	0.00221592	DOWN
Camta2	-2.23634	0.000153117	0.00221592	DOWN
Vmn2r6	2.69633	0.000153173	0.00221592	UP
Uqcrh	-1.10892	0.000153652	0.00222083	DOWN
Bckdhb	-1.54699	0.0001547	0.00223395	DOWN
Mrps18a	-1.63771	0.000156561	0.00225876	DOWN
Mrps36	-1.43289	0.000157016	0.00226328	DOWN
Mrps23	-1.29646	0.00015746	0.0022651	DOWN
Plekho2	1.81002	0.000157565	0.0022651	UP
Timm44	-1.41799	0.00015757	0.0022651	DOWN
Vmn1r88	2.17913	0.0001578	0.00226636	UP
Srsf5	1.68802	0.000157943	0.00226636	UP
Tmx2	-1.24494	0.000158529	0.00227165	DOWN
Sdhb	-1.15168	0.000158941	0.00227165	DOWN
Timmdc1	-1.51708	0.000158982	0.00227165	DOWN
Lrp1	-1.08439	0.000159087	0.00227165	DOWN
Slc25a34	-1.37548	0.000159108	0.00227165	DOWN
Ccdc82	1.45535	0.000159168	0.00227165	UP
Myh9	1.31724	0.000159533	0.00227482	UP
Dgkh	1.43774	0.000159733	0.00227562	UP
Tmem72	1.54708	0.000160409	0.0022832	UP
Eef1d	-1.19166	0.000162099	0.00230346	DOWN
Ccn4	2.81203	0.000162122	0.00230346	UP
Cars2	-1.96234	0.000162681	0.00230935	DOWN
Nup153	1.20868	0.000163502	0.00231892	UP
Rnf207	-2.42198	0.000164897	0.00233651	DOWN
Ndufs8	-1.19849	0.000165035	0.00233651	DOWN
Opa1	-1.12104	0.000165259	0.0023376	DOWN
Epdr1	-1.73041	0.000165698	0.00234172	DOWN
Rnf24	1.96326	0.000166782	0.00235494	UP
Sesn2	2.51544	0.000166992	0.00235582	UP
Fnbp4	1.71676	0.000167201	0.00235667	UP
Folr2	-1.88939	0.000168263	0.00236955	DOWN
Mpnd	-1.97199	0.000168552	0.00237151	DOWN
Lhpp	-2.7354	0.000169327	0.00237917	DOWN
Immp1l	-1.44902	0.000169396	0.00237917	DOWN
Tmem223	-1.52851	0.000169664	0.00238084	DOWN
Islr	-1.99636	0.000170392	0.00238894	DOWN
Has1	3.43626	0.000172402	0.00241499	UP
Mtif2	-1.45093	0.000174817	0.00244472	DOWN
Prodh	-1.77433	0.000174832	0.00244472	DOWN
Tppp	-1.83661	0.000175132	0.00244677	DOWN
Ugdh	1.5234	0.000175329	0.00244738	UP
Eif5	1.30119	0.00017561	0.00244784	UP
Ndufb9	-1.11574	0.00017567	0.00244784	DOWN
Pcolce	-1.72714	0.000176679	0.00245973	DOWN
Neurl2	-2.12478	0.0001769	0.00246066	DOWN
Vtn	-1.8281	0.000177806	0.0024711	DOWN
Zfp488	2.13693	0.000178729	0.00248176	UP
Itga4	2.04431	0.000180223	0.00250031	UP
Qrsl1	-1.63142	0.000180929	0.00250792	DOWN
Fam169b	3.75757	0.000181863	0.00251867	UP
Atp1a1	-1.26579	0.0001831	0.00253361	DOWN
Mpst	-1.99182	0.000183813	0.00254125	DOWN
Ctsd	-1.08081	0.000184708	0.00254739	DOWN
Akr1b3	-1.16889	0.000184714	0.00254739	DOWN
Sirt3	-1.84491	0.000184737	0.00254739	DOWN
Itgb3	2.10269	0.000185387	0.00255414	UP
Slc20a1	1.56228	0.000185675	0.00255588	UP
Vmn1r27	3.12159	0.000187285	0.00257582	UP
Cox5a	-1.29351	0.000187469	0.00257612	DOWN
Steap2	2.45896	0.000187698	0.00257703	UP
A630089N07Rik	2.44173	0.000188337	0.00258358	UP
Ubxn6	-1.43978	0.000190397	0.00260777	DOWN
Klhl7	-1.94534	0.000190429	0.00260777	DOWN
Dhrs7	-1.56962	0.000190914	0.00261217	DOWN
Vmn2r102	2.5887	0.000191874	0.00262305	UP
Stk17b	1.38411	0.00019306	0.002637	UP
Cited4	-2.69214	0.000193406	0.00263945	DOWN
Samd9l	1.37583	0.000194264	0.00264889	UP
Olfr986	1.91762	0.000195326	0.00266109	UP
Eef1akmt1	-1.81871	0.000196043	0.00266856	DOWN
Nes	1.33484	0.000196406	0.00267123	UP
Csgalnact1	1.89464	0.00019677	0.00267388	UP
Aig1	-1.60554	0.000197301	0.00267882	DOWN
Col6a1	-1.36582	0.000198654	0.00269488	DOWN
Mif4gd	-1.76412	0.000199256	0.00269887	DOWN
P2ry13	2.50342	0.000199288	0.00269887	UP
Prxl2c	-1.40587	0.000199462	0.00269894	DOWN
Olfr414	3.01457	0.00020047	0.00271027	UP
Fnta	-1.35508	0.000200651	0.0027104	DOWN
Tnfaip6	2.22349	0.000200823	0.00271043	UP
Tpi1	-1.0552	0.000201402	0.00271594	DOWN
Coa3	-1.59846	0.000203835	0.00274437	DOWN
Trat1	2.43126	0.000203855	0.00274437	UP
Phex	3.54139	0.000204084	0.00274513	UP
Tmem106b	-1.16033	0.00020426	0.00274517	DOWN
Cdc34	-1.55605	0.000205611	0.00276099	DOWN
Ms4a12	2.80573	0.00020621	0.0027667	UP
Slc30a4	1.29146	0.000206756	0.00277168	UP
Kcnb1	-1.53661	0.000207103	0.002774	DOWN
Tecr	-1.28907	0.000208221	0.00278662	DOWN
Pabpc1	1.29612	0.000208463	0.00278751	UP
Anxa7	1.12614	0.000208925	0.00278966	UP
Got2	-1.29854	0.000208975	0.00278966	DOWN
Mrpl42	-1.16607	0.000209661	0.00279616	DOWN
AC168977.1	3.19133	0.000209813	0.00279616	UP
Zfp473	2.5367	0.000210088	0.00279748	UP
Clip4	-1.33627	0.0002108	0.00280461	DOWN
L3hypdh	-4.29826	0.000211447	0.00281086	DOWN
Tnfrsf12a	1.57461	0.000212192	0.00281808	UP
Tsr1	1.40844	0.000212359	0.00281808	UP
Olfr600	2.70333	0.000212522	0.00281808	UP
Jmjd8	-1.91594	0.000214194	0.00283769	DOWN
Vmn2r52	3.34123	0.000214357	0.00283769	UP
Olfr1459	2.85645	0.000214661	0.00283934	UP
Hsd17b4	-1.29364	0.000215646	0.00285	DOWN
Polq	-3.06531	0.000216352	0.00285696	DOWN
Cd84	1.79879	0.000217243	0.00286634	UP
Acsf3	-1.90746	0.000218912	0.00288476	DOWN
Sh3bgr	-1.29216	0.000219001	0.00288476	DOWN
Pcyox1	-1.27701	0.000220403	0.00289895	DOWN
Gys1	-1.38628	0.000220444	0.00289895	DOWN
Timm50	-1.54186	0.000221307	0.0029079	DOWN
Ndufb3	-1.19976	0.000221882	0.00291305	DOWN
Vmn1r229	2.25634	0.00022218	0.00291455	UP
Chd5	4.56325	0.000222409	0.00291515	UP
Olfr859	2.72828	0.000224316	0.00293575	UP
Coq6	-1.41413	0.00022435	0.00293575	DOWN
Olfr341	2.54198	0.000224771	0.00293884	UP
Tfpi2	2.89523	0.000225083	0.00294051	UP
Jmjd1c	1.11396	0.000227663	0.00297176	UP
Ecsit	-1.46318	0.000229516	0.00299349	DOWN
Bsg	-1.14778	0.000229783	0.00299453	DOWN
Rnf187	-1.45951	0.00023098	0.00300766	DOWN
Entpd1	1.30675	0.000231645	0.00301385	UP
Dguok	-1.96449	0.000233276	0.00303258	DOWN
Vmn1r202	3.00306	0.000234808	0.00305001	UP
Nudt19	-1.39347	0.000235691	0.00305898	DOWN
Dag1	-1.22038	0.000237116	0.00307497	DOWN
Idua	-1.96941	0.000238356	0.00308852	DOWN
Cep85	-1.42849	0.000239603	0.00310215	DOWN
Frrs1	2.06902	0.000240288	0.0031085	UP
Igf2r	-1.09446	0.000241474	0.00312129	DOWN
Vmn1r213	2.66661	0.000242083	0.00312662	UP
Samm50	-1.3596	0.000242314	0.00312707	DOWN
Ncf1	1.45533	0.000242829	0.00312893	UP
Narfl	-1.47027	0.000242851	0.00312893	DOWN
Kcnh2	-1.74265	0.000244939	0.00315327	DOWN
Rdh14	-1.474	0.000245385	0.00315645	DOWN
Tmem201	-1.84088	0.000246088	0.00316294	DOWN
Eps8	1.36728	0.000247351	0.0031766	UP
Aamdc	-1.55803	0.000248358	0.00318696	DOWN
Mfn2	-1.32352	0.000249315	0.00319666	DOWN
Nrtn	-2.13503	0.000250329	0.00320708	DOWN
3425401B19Rik	-1.24873	0.000251235	0.00321355	DOWN
Ermap	5.0738	0.000251239	0.00321355	UP
Ephx2	-1.0717	0.000252555	0.00322779	DOWN
Ddt	-1.65969	0.000253348	0.00323369	DOWN
Naxe	-1.46651	0.000253753	0.00323369	DOWN
Zbed6	1.65309	0.000253759	0.00323369	UP
Bag3	-1.24849	0.00025383	0.00323369	DOWN
Veph1	4.12211	0.000254238	0.00323629	UP
Sdc1	1.74066	0.00025472	0.00323984	UP
Mob1b	1.29806	0.000255382	0.00324553	UP
Tsku	2.25001	0.000255576	0.00324553	UP
Tmem143	-1.64147	0.000257323	0.0032651	DOWN
Mrpl37	-1.56382	0.000260457	0.00329723	DOWN
Olfr63	2.28381	0.000260461	0.00329723	UP
Uros	-1.63101	0.000260477	0.00329723	DOWN
Zfp651	-1.768	0.000261569	0.00330829	DOWN
Ugt1a1	5.80695	0.000261767	0.00330829	UP
Ttc38	-1.61584	0.000262476	0.00331463	DOWN
Vmn1r183	2.36798	0.000263981	0.00333098	UP
Vmn1r68	2.66736	0.00026678	0.00336363	UP
Ckb	-1.71528	0.000267474	0.0033697	DOWN
Gm11027	3.4575	0.00026941	0.0033914	UP
Fosb	3.18995	0.000270097	0.00339737	UP
Itgal	2.39403	0.000271097	0.00340725	UP
Pcx	-1.60378	0.00027255	0.00342281	DOWN
Vmn1r26	2.29727	0.000273693	0.00343445	UP
Nkx2-5	-1.55689	0.000275976	0.00346036	DOWN
Psg16	1.69963	0.00027662	0.00346571	UP
Gm20594	1.17477	0.000277505	0.00347405	UP
Atp5g3	-1.38886	0.000278924	0.00348809	DOWN
Schip1	-1.23835	0.000279065	0.00348809	DOWN
Gm38394	1.26953	0.000280656	0.00350523	UP
Myl2	-1.04835	0.000280953	0.00350618	DOWN
Myorg	-1.96408	0.000281604	0.00351155	DOWN
Dpt	-1.32068	0.000282565	0.00352077	DOWN
Bcl6b	1.89332	0.000285285	0.00355187	UP
Timp2	-1.47521	0.00028795	0.00358225	DOWN
Laptm4a	-1.16759	0.000288215	0.00358275	DOWN
Zc3h7a	1.41758	0.000289147	0.00359152	UP
Tmem164	-1.62194	0.000289462	0.00359262	DOWN
Gm6377	3.08143	0.000290857	0.00360713	UP
Myzap	-1.05294	0.000292616	0.00362612	DOWN
Abcb9	-2.5412	0.000294392	0.00364528	DOWN
Casp4	2.20718	0.000294971	0.00364961	UP
Olfr767	2.68323	0.000295961	0.00365901	UP
Tomm5	-1.21982	0.000296896	0.00366772	DOWN
Rdh10	1.85175	0.000297184	0.00366843	UP
Zkscan2	2.66113	0.000300392	0.00370514	UP
Mmp3	1.52367	0.000301183	0.00371202	UP
Sirt4	-3.245	0.000304017	0.00374405	DOWN
Stk11	-1.60228	0.000305741	0.00376237	DOWN
Olfr846	2.75015	0.000306473	0.00376845	UP
Dpp10	2.74199	0.000308782	0.00379392	UP
Pex6	-3.24776	0.000309683	0.00380205	DOWN
Ptges3l	-1.61752	0.000310129	0.00380362	DOWN
Npm1	1.18654	0.00031029	0.00380362	UP
Olfr190	3.32149	0.000311617	0.00381547	UP
Stat5b	-1.42377	0.000311736	0.00381547	DOWN
Olfr243	3.00694	0.000312028	0.0038161	UP
Zdhhc20	1.49075	0.000313246	0.00382806	UP
Pla2g5	-1.60543	0.00031368	0.00383041	DOWN
Nt5c1a	-1.96898	0.000313988	0.00383123	DOWN
Nedd9	1.20631	0.00031632	0.00385569	UP
Nkain3	3.18575	0.000316478	0.00385569	UP
Acp6	-1.82502	0.000316833	0.00385706	DOWN
Ndufs5	-1.33285	0.000317811	0.00386309	DOWN
Cbl	1.24986	0.000317814	0.00386309	UP
Aqp9	2.64286	0.000319437	0.00387986	UP
Fh1	-1.05813	0.000320037	0.00388418	DOWN
Sptb	-1.36044	0.000322959	0.00391665	DOWN
Ndufs2	-1.12009	0.000325617	0.00394587	DOWN
Rgs16	2.95968	0.000326	0.00394662	UP
Gm11127	4.43765	0.000326175	0.00394662	UP
Car13	2.73598	0.000326481	0.00394732	UP
Mrpl14	-1.64141	0.000326922	0.00394965	DOWN
Lrrtm2	1.81168	0.000328965	0.00397131	UP
Crat	-1.225	0.000329322	0.0039726	DOWN
Pomgnt2	-2.5673	0.000335984	0.00404861	DOWN
Pkig	-1.30376	0.000336132	0.00404861	DOWN
Olfr509	2.34673	0.000338047	0.00406859	UP
Grk4	2.15155	0.000340359	0.00409332	UP
Olfr161	2.38612	0.000345255	0.00414757	UP
Eno1	1.08103	0.000345392	0.00414757	UP
Ndufb4	-1.26919	0.000347698	0.00417211	DOWN
Olfr506	3.44812	0.000348704	0.00418103	UP
Gm49369	-3.50912	0.000349133	0.00418302	DOWN
Hdhd2	-1.27844	0.000349995	0.00419019	DOWN
Ccdc60	2.37192	0.000350343	0.0041912	UP
Olfr648	2.36492	0.000352657	0.00421326	UP
Gadd45gip1	-1.39854	0.000352717	0.00421326	DOWN
Colec12	2.2178	0.000354455	0.00423085	UP
Rhoc	1.30308	0.00035546	0.00423965	UP
Ppip5k2	-1.21873	0.000355812	0.00424067	DOWN
Cfl1	1.10357	0.000356261	0.00424109	UP
Gorasp1	-1.71888	0.000356483	0.00424109	DOWN
Smim3	1.65315	0.000356648	0.00424109	UP
Pttg1	-1.24447	0.000357345	0.00424621	DOWN
Tbc1d15	1.65249	0.000358983	0.00426249	UP
Vmn2r59	2.64874	0.000360075	0.0042703	UP
Olfr2	2.41712	0.000360178	0.0042703	UP
Atp8b1	1.44427	0.000362805	0.00429277	UP
Tbc1d2	2.30902	0.000362807	0.00429277	UP
Ciao2b	-1.56907	0.000362884	0.00429277	DOWN
Csrnp1	1.92706	0.000365845	0.00432458	UP
Tmem140	-1.74965	0.000366168	0.00432519	DOWN
Vdac1	-1.05849	0.000366796	0.0043294	DOWN
Chchd2	-1.1984	0.000370037	0.0043644	DOWN
Nudt14	1.26337	0.000372004	0.00438436	UP
Txnrd1	1.55317	0.000372775	0.00439019	UP
Ddo	-1.46795	0.000374494	0.00440716	DOWN
Syngr1	-1.54165	0.000375763	0.00441883	DOWN
Hnmt	-2.17147	0.00037845	0.00444714	DOWN
Pgm2	1.75512	0.000379236	0.00445026	UP
Rnf125	1.96922	0.000379276	0.00445026	UP
Wfdc17	1.52146	0.000379709	0.00445206	UP
Lyn	1.24274	0.000380882	0.00445941	UP
Tsc2	-1.39333	0.000380897	0.00445941	DOWN
Olfr539	2.07952	0.00038207	0.00446593	UP
Tmem242	-1.35692	0.000382091	0.00446593	DOWN
C030006K11Rik	-1.54274	0.000382296	0.00446593	DOWN
Olfr66	2.606	0.000382761	0.00446808	UP
Kmt2e	1.31197	0.000383825	0.00447721	UP
Nfam1	1.62339	0.000384499	0.00448178	UP
Olfr362	3.52925	0.000385682	0.00449094	UP
Ndufa11	-1.23141	0.000386008	0.00449094	DOWN
Il17ra	2.26283	0.000386389	0.00449094	UP
Snta1	-1.48673	0.000386541	0.00449094	DOWN
Vmn1r209	3.01055	0.000386697	0.00449094	UP
Olfr1183	2.97326	0.000388351	0.00450685	UP
Nqo2	-1.42475	0.000389221	0.00451366	DOWN
Col4a5	-1.25477	0.000391094	0.00453207	DOWN
Metap1d	-2.23089	0.000392321	0.00454298	DOWN
Rbm24	-1.27565	0.000394232	0.00456178	DOWN
Bhlhe40	1.4444	0.000397235	0.00459319	UP
Grn	-1.56343	0.000399653	0.00461779	DOWN
Vmn1r197	2.2994	0.000400658	0.00462605	UP
Fitm1	-1.34407	0.000402349	0.00463892	DOWN
Snhg11	1.59896	0.000402357	0.00463892	UP
Sema3b	-1.66291	0.000403404	0.00464762	DOWN
Rnpep	-1.61517	0.00040412	0.0046525	DOWN
Serhl	-1.54235	0.000404737	0.00465623	DOWN
Alpk3	-1.39099	0.00041019	0.00471555	DOWN
Pgm1	-1.08207	0.000418633	0.00480789	DOWN
Fgf23	4.6352	0.000418827	0.00480789	UP
Vmn1r76	2.18779	0.000419673	0.00481362	UP
Mtch1	-1.46452	0.000419932	0.00481362	DOWN
Rmnd1	-1.34543	0.000421279	0.00482559	DOWN
Smim11	-1.5111	0.0004223	0.0048338	DOWN
Cdk15	3.27234	0.000422771	0.0048357	UP
Echdc3	-1.65442	0.000423566	0.00484132	DOWN
Slc9b2	3.03964	0.000425268	0.00485412	UP
Rps6ka2	-1.4574	0.000425408	0.00485412	DOWN
Bri3bp	-1.38259	0.000425602	0.00485412	DOWN
Churc1	-1.51808	0.000429354	0.00488954	DOWN
S100a1	-1.01283	0.000429391	0.00488954	DOWN
Slc2a12	-2.44283	0.00042963	0.00488954	DOWN
Polr2e	-1.30712	0.000430863	0.00490006	DOWN
Spon2	-2.80862	0.000431384	0.00490248	DOWN
Scrn2	-2.19817	0.00043207	0.00490629	DOWN
Gpcpd1	-1.10012	0.000432336	0.00490629	DOWN
Cenpv	-2.62831	0.000439084	0.00497931	DOWN
Pmpcb	-1.10149	0.00044038	0.00499045	DOWN
Kifc3	-1.50049	0.000441962	0.00500355	DOWN
Ces2b	2.93485	0.000442165	0.00500355	UP
Camk2a	-1.55833	0.000442951	0.00500887	DOWN
Tarsl2	-1.36332	0.00044428	0.00502034	DOWN
Olfr1247	2.22696	0.000444837	0.00502305	UP
Vmn1r77	2.77246	0.000449058	0.00506712	UP
Coprs	-2.6572	0.000450944	0.00508257	DOWN
Olfr1264	3.0218	0.000451067	0.00508257	UP
Olfr1157	2.9507	0.000453945	0.00510782	UP
Syncrip	1.08048	0.00045395	0.00510782	UP
AC125149.3	4.12365	0.000455068	0.00511678	UP
Olfr90	1.86639	0.000456782	0.00512898	UP
Cox5b	-1.09341	0.000457085	0.00512898	DOWN
Oma1	-1.39354	0.000457432	0.00512898	DOWN
Fam91a1	1.23589	0.000457443	0.00512898	UP
Gadl1	4.43759	0.000457853	0.00512996	UP
Tnfrsf22	1.92715	0.000458578	0.00513446	UP
Slfn9	2.07027	0.000459306	0.00513899	UP
Olfr898	2.94304	0.000459723	0.00514004	UP
Tmem173	1.87615	0.000461198	0.00515291	UP
Vmn2r97	2.87979	0.000463692	0.00517714	UP
Atp5j2	-1.03899	0.000465281	0.00519123	DOWN
Vmn2r86	3.29931	0.000465738	0.00519268	UP
Slc11a1	2.01966	0.000466271	0.0051949	UP
Olfr893	3.78158	0.000466591	0.0051949	UP
Prune2	-1.02242	0.00046778	0.00520451	DOWN
Antxr2	-1.07471	0.000468774	0.00521191	DOWN
Vmn1r203	2.53077	0.000470326	0.00522551	UP
Cox6b1	-0.997883	0.000472385	0.00524473	DOWN
Rab8b	1.34211	0.000472898	0.00524676	UP
Usp34	1.11873	0.000474108	0.00525318	UP
Mrps21	-1.17673	0.000474138	0.00525318	DOWN
March6	-1.05422	0.00047456	0.0052542	DOWN
Trpv2	1.9039	0.000477061	0.00527821	UP
Uqcc3	-1.64291	0.000478733	0.00529303	DOWN
Styx	1.63144	0.000481478	0.00531968	UP
Olfr1039	3.80568	0.000482191	0.00532107	UP
Hadha	-1.02529	0.000482273	0.00532107	DOWN
Ubac1	-1.249	0.000483473	0.00533061	DOWN
Chd1	1.23087	0.000487166	0.0053676	UP
Fstl3	1.98062	0.00048931	0.00538151	UP
Ripk3	2.48196	0.000489424	0.00538151	UP
Vmn1r193	2.88632	0.000489443	0.00538151	UP
Olfr1031	3.82901	0.00048987	0.00538248	UP
Bend4	2.4311	0.000492393	0.00540462	UP
Vmn2r99	2.22803	0.000492827	0.00540462	UP
Mb	-1.03374	0.000492905	0.00540462	DOWN
Filip1	-1.09583	0.000496576	0.00544111	DOWN
Mrpl53	-1.48467	0.000497638	0.005449	DOWN
Fermt2	1.07537	0.000498506	0.00545474	UP
Nup210l	2.90595	0.000500239	0.00546994	UP
Pvr	1.17945	0.000501046	0.00547501	UP
Cbr1	-2.0431	0.000501519	0.00547641	DOWN
Cyb5rl	-2.25683	0.000510289	0.00556834	DOWN
Smg1	1.08388	0.000515895	0.00562566	UP
Mest	2.2603	0.00051781	0.00564268	UP
Ss18l2	-1.41072	0.000518741	0.00564894	DOWN
Rasl10b	-1.48551	0.00051965	0.00565331	DOWN
Ppp5c	-1.47157	0.000519853	0.00565331	DOWN
Olfr31	2.68471	0.000521239	0.00566376	UP
Immt	-0.976871	0.000521526	0.00566376	DOWN
BC034090	-1.4734	0.00052344	0.00568066	DOWN
Sbno2	1.75846	0.000528933	0.00573636	UP
Vmn1r206	3.24203	0.000530139	0.00574553	UP
Amigo1	-1.73982	0.000530648	0.00574712	DOWN
Grik2	2.7313	0.000533056	0.00576927	UP
Capza1	1.08429	0.000539461	0.00583423	UP
Phyhd1	-1.32857	0.000539792	0.00583423	DOWN
Napsa	2.83467	0.000541202	0.00584549	UP
Il11	4.68963	0.000543513	0.00586648	UP
Lrrfip1	1.20344	0.000548012	0.00591102	UP
Araf	-1.45334	0.000550395	0.00593269	DOWN
Plat	1.54785	0.000553576	0.00595945	UP
Olfr1191-ps1	2.6508	0.000553627	0.00595945	UP
Olfr839-ps1	2.20669	0.000555437	0.0059749	UP
Cldn5	1.79029	0.00055691	0.00598669	UP
Vmn1r20	3.01313	0.000558164	0.00599247	UP
Dnajc15	-1.35834	0.000558201	0.00599247	DOWN
Tcta	-1.3602	0.000558688	0.00599364	DOWN
Fbxo32	-1.20825	0.000560888	0.00601319	DOWN
Nebl	-1.03343	0.000563286	0.00603482	DOWN
Eid3	3.21859	0.000564613	0.00604498	UP
Zfp738	1.53924	0.000565834	0.00605397	UP
Abhd8	-2.05879	0.000567353	0.00606427	DOWN
Uqcrfs1	-1.13745	0.000567559	0.00606427	DOWN
Cemip2	1.32681	0.000568067	0.00606561	UP
Sord	-1.05306	0.000570416	0.00608267	DOWN
Rgl3	-6.16321	0.00057043	0.00608267	DOWN
Tmco1	-1.202	0.000571707	0.00609221	DOWN
Atp5e	-1.41941	0.0005752	0.00612532	DOWN
Atp13a3	1.07455	0.000576498	0.00613504	UP
Olfr1467	3.4828	0.00057775	0.00614425	UP
Dennd4a	1.3536	0.000580706	0.00617156	UP
Aldoa	-1.09584	0.000584527	0.00620801	DOWN
Yif1b	-1.60487	0.000589066	0.00625204	DOWN
Ndufv3	-1.14349	0.000590706	0.00626527	DOWN
Usp13	-1.11377	0.000592224	0.00627718	DOWN
Agtrap	-1.50163	0.000594692	0.00629735	DOWN
Olfr1381	2.65307	0.000594919	0.00629735	UP
Psap	-1.24562	0.00059556	0.00629993	DOWN
Tnfsf14	3.21288	0.00059699	0.0063025	UP
Aldh1a2	1.42283	0.000597254	0.0063025	UP
Mcee	-1.27522	0.00059728	0.0063025	DOWN
Kxd1	-1.30812	0.000597388	0.0063025	DOWN
Bdh1	-1.51577	0.000598196	0.00630685	DOWN
Vmn1r60	2.90476	0.000598812	0.00630916	UP
Ppt2	-1.61554	0.000600015	0.00631699	DOWN
Fgd3	2.037	0.000600362	0.00631699	UP
Utp20	1.1758	0.000600748	0.00631699	UP
Mrm1	-1.78642	0.000602671	0.00633227	DOWN
Timm13	-1.63147	0.000603198	0.00633227	DOWN
4932411N23Rik	3.67007	0.000603395	0.00633227	UP
Maf1	-1.473	0.000604748	0.00634227	DOWN
2410002F23Rik	1.63484	0.000607658	0.00636859	UP
Agpat3	-1.13636	0.000611465	0.00640427	DOWN
Abcd3	-1.14408	0.000612289	0.00640542	DOWN
Psmb5	-1.29977	0.00061238	0.00640542	DOWN
Stard7	-1.0665	0.000612862	0.00640624	DOWN
Dnah17	2.49406	0.000614807	0.00642235	UP
Olfr1116	2.28401	0.000616383	0.00643382	UP
Itgax	2.6147	0.00061708	0.00643382	UP
Olfr716	2.62445	0.000617119	0.00643382	UP
Mrpl21	-1.38501	0.000618573	0.00644327	DOWN
Vmn2r56	2.35244	0.000618836	0.00644327	UP
Hal	3.46705	0.000620422	0.00645556	UP
Trem3	4.96552	0.000622499	0.00647293	UP
Timm23	-1.03043	0.000623164	0.00647561	DOWN
Hibadh	-1.13391	0.000625988	0.0065007	DOWN
Pam	-0.965811	0.000626792	0.00650481	DOWN
Mysm1	1.38073	0.000629466	0.0065283	UP
Letm1	-1.32725	0.000630155	0.00653118	DOWN
Grcc10	-1.44646	0.000634369	0.00657058	DOWN
Ogdhl	-1.2482	0.000638007	0.00660395	DOWN
Olfr740	2.74851	0.000638825	0.00660645	UP
Kcnq3	2.56698	0.000639079	0.00660645	UP
Atp8a1	-1.15781	0.000641278	0.00662488	DOWN
Met	1.88558	0.000644817	0.00665711	UP
Suds3	-1.32998	0.000646472	0.00666986	DOWN
Ndufa13	-1.06545	0.000648801	0.00668955	DOWN
Ndufv1	-1.10037	0.000649529	0.00669175	DOWN
Art4	-1.84248	0.000649856	0.00669175	DOWN
Cd46	1.55745	0.000650779	0.00669692	UP
Zfp655	1.15412	0.000656597	0.00675204	UP
Vamp5	-1.56414	0.000656986	0.00675204	DOWN
Dhrs1	-1.44069	0.000657865	0.00675372	DOWN
Ctdp1	1.64173	0.000657999	0.00675372	UP
Grk1	2.03193	0.000659217	0.00676187	UP
Fbxl5	1.0682	0.000660469	0.00677034	UP
Smpd2	-1.77173	0.000661471	0.00677225	DOWN
Retsat	-1.20979	0.000661622	0.00677225	DOWN
Ndufaf1	-1.31092	0.000661933	0.00677225	DOWN
Ntrk3	2.50423	0.000663298	0.00678185	UP
Atp5b	-1.09445	0.000663992	0.00678458	DOWN
Fam120c	-1.62236	0.000664984	0.00679036	DOWN
Fdx1	-1.2189	0.000670774	0.00684211	DOWN
Fgf2	1.35373	0.000671	0.00684211	UP
Olfr613	2.4501	0.000671751	0.00684211	UP
Tcerg1	1.37538	0.000671774	0.00684211	UP
Ndufc1	-1.2654	0.000674382	0.00686427	DOWN
Ndufa6	-1.04898	0.000678314	0.00689988	DOWN
Mrpl49	-1.41239	0.000679172	0.00690419	DOWN
Magix	-2.20284	0.00068102	0.00691855	DOWN
Myl3	-1.24397	0.000681734	0.00692138	DOWN
Tubg1	-1.82968	0.000682834	0.00692813	DOWN
Pabpc4	-1.31271	0.000686511	0.0069583	DOWN
Acy3	-1.75355	0.000686683	0.0069583	DOWN
Tstd3	-1.75508	0.000687517	0.00696231	DOWN
Spty2d1	1.35637	0.000691531	0.00699851	UP
Zfp36	1.78828	0.000692397	0.00700281	UP
Dld	-1.00302	0.000693277	0.00700725	DOWN
Ncaph2	-1.32312	0.000694747	0.00701765	DOWN
Per2	1.70901	0.00069715	0.00703745	UP
BC004004	-1.02568	0.000698525	0.00704685	DOWN
Olfr351	2.59853	0.00070046	0.0070619	UP
Acadvl	-1.04889	0.000703512	0.00708817	DOWN
Itgb6	-2.13754	0.000707111	0.00711637	DOWN
Gstk1	-1.29903	0.000707205	0.00711637	DOWN
Fam49b	1.22652	0.000712438	0.00716449	UP
Acer3	1.53724	0.000715689	0.00718808	UP
Cox7a2	-1.11184	0.000716224	0.00718808	DOWN
Aldh2	-1.58493	0.000716529	0.00718808	DOWN
Pum3	1.5562	0.000716593	0.00718808	UP
Itgb5	-1.21875	0.000717982	0.00719747	DOWN
Cul4a	-1.18629	0.00071892	0.00720234	DOWN
Olfr1489	2.18412	0.000722753	0.00723618	UP
Bpifc	3.71855	0.000725037	0.00725447	UP
Med24	-1.535	0.000726268	0.00726222	DOWN
Uqcr11	-1.1011	0.000729293	0.00728789	DOWN
Megf8	-1.52157	0.000730656	0.00729693	DOWN
Unc93a	3.72824	0.000738385	0.00736837	UP
Nfic	-1.34562	0.000738737	0.00736837	DOWN
Tmed1	-1.6738	0.000746134	0.0074316	DOWN
Ndufa9	-0.980383	0.000746368	0.0074316	DOWN
Plin5	-1.10324	0.000746479	0.0074316	DOWN
Mphosph10	1.41127	0.000752857	0.00749041	UP
Ahctf1	1.05702	0.000754254	0.00749962	UP
Rrp12	1.28088	0.000755824	0.00751053	UP
Bola3	-1.19369	0.000757562	0.00752167	DOWN
Mknk2	-1.29475	0.000757891	0.00752167	DOWN
Egln1	-1.29008	0.000760778	0.00754561	DOWN
Rap1b	1.24608	0.000761892	0.00755195	UP
Clic1	1.24618	0.000772591	0.00765322	UP
Mcat	-1.43056	0.000774744	0.00766978	DOWN
Rad18	2.74348	0.000775794	0.00767125	UP
Olfr904	2.72178	0.000775858	0.00767125	UP
Vmn1r34	4.23245	0.000776969	0.00767746	UP
Cblb	1.3704	0.000778445	0.00768727	UP
Egr2	2.58058	0.000781615	0.00771378	UP
Tshr	4.72633	0.000786491	0.00775708	UP
Nlrp12	2.8755	0.000792743	0.0078139	UP
Nme2	-1.07088	0.000798029	0.00786113	DOWN
Mrps27	-1.43516	0.000802356	0.00789886	DOWN
Atp5j	-1.33284	0.000803479	0.00790502	DOWN
Fmnl1	1.80384	0.000807423	0.00793891	UP
Hibch	-1.17425	0.000809558	0.00794654	DOWN
Dusp11	1.16689	0.000809617	0.00794654	UP
Hdac11	-1.90279	0.000809699	0.00794654	DOWN
Pex19	-1.13642	0.000811503	0.00795934	DOWN
Tmem109	-1.31808	0.000816085	0.00799935	DOWN
Adcy9	-1.45276	0.000817357	0.00800688	DOWN
Ceacam10	5.04559	0.000819646	0.00802436	UP
Lonp1	-1.3023	0.000824913	0.00807095	DOWN
Aarsd1	-1.60047	0.000825428	0.00807103	DOWN
Twsg1	-1.17313	0.000827774	0.00808898	DOWN
Hikeshi	-1.67652	0.000828877	0.00809479	DOWN
Edf1	-1.24625	0.000829682	0.00809768	DOWN
Rhox8	3.50311	0.000839592	0.00818937	UP
Cntrl	1.38972	0.000844912	0.00823621	UP
Tmcc2	-1.99872	0.000848636	0.00826744	DOWN
A530032D15Rik	4.36724	0.000856363	0.00833761	UP
Syngr2	-1.263	0.000857467	0.00834325	DOWN
Lonp2	-1.05932	0.000858035	0.00834367	DOWN
I830077J02Rik	2.86846	0.000858937	0.00834734	UP
Uqcc2	-1.16998	0.00086451	0.00839636	DOWN
Kdm6b	1.67087	0.000871046	0.00845467	UP
Slc7a6	1.65053	0.000872257	0.00846126	UP
Clstn1	-1.35165	0.000880658	0.00853257	DOWN
Amd1	-1.00082	0.000880681	0.00853257	DOWN
Mmab	-1.59665	0.000891151	0.00862875	DOWN
Npepl1	-1.65568	0.000892345	0.00863505	DOWN
Hif1an	-1.20993	0.000899029	0.00869263	DOWN
Olfr1173	2.49783	0.000899694	0.00869263	UP
Ndufa10	-0.942828	0.000899935	0.00869263	DOWN
Cisd3	-1.51609	0.000902741	0.00871444	DOWN
Ssbp2	-1.40769	0.000903339	0.00871492	DOWN
Ndrg1	1.28624	0.000906776	0.00873728	UP
Ndufs6	-1.09357	0.000906869	0.00873728	DOWN
Dph5	1.64329	0.000907306	0.00873728	UP
Cep68	-1.14443	0.000908111	0.00873974	DOWN
Hnrnpdl	1.22748	0.000911635	0.00876835	UP
Zer1	-1.60571	0.000913877	0.0087846	DOWN
Gpr141	2.69474	0.000916782	0.0088072	UP
Ndufb6	-1.23688	0.000918684	0.00881587	DOWN
Bcat1	1.90529	0.000918793	0.00881587	UP
Col5a1	-1.18872	0.000923102	0.00884865	DOWN
Cs	-1.08494	0.000923322	0.00884865	DOWN
Adsl	-1.38791	0.000924643	0.00885597	DOWN
Slc23a2	1.28105	0.000932521	0.00892604	UP
Vmn1r9	2.72483	0.000934133	0.00893609	UP
Olfr709-ps1	2.59727	0.000935211	0.00894102	UP
Hsd17b10	-1.073	0.000938999	0.00896727	DOWN
Gm8334	5.61315	0.000939085	0.00896727	UP
Eaf1	1.41456	0.000941508	0.00897992	UP
Mmp12	4.72423	0.000941539	0.00897992	UP
Pde1b	2.47081	0.000942861	0.00898713	UP
Tmem126b	-1.50317	0.000945165	0.0090037	DOWN
Rilp	-1.67676	0.000948839	0.00903329	DOWN
Ppp2r3a	-0.966526	0.000965021	0.00918185	DOWN
Snap47	-1.27038	0.000971941	0.00924216	DOWN
Atp5c1	-0.916765	0.000974169	0.00925781	DOWN
Tll1	2.76724	0.000976854	0.00927778	UP
Pih1d1	-1.51201	0.000978981	0.00928711	DOWN
Ppp1r37	-1.48493	0.000979005	0.00928711	DOWN
Tmtc1	-0.97591	0.000979948	0.00929051	DOWN
Gm29666	2.02108	0.000983237	0.00931614	UP
Tsfm	-1.63842	0.000986949	0.00934574	DOWN
Postn	1.02953	0.000989785	0.00936702	UP
Dpm1	-1.94409	0.000990912	0.00937211	DOWN
Plekhg1	1.40404	0.000995345	0.00940337	UP
Pla2g4a	1.69905	0.0009954	0.00940337	UP
Vmn1r86	2.66394	0.00100262	0.00946592	UP
Gm10681	4.86126	0.00100892	0.00951977	UP
Mrpl41	-1.23874	0.00101013	0.00952558	DOWN
Napb	7.78134	0.00101169	0.00953455	UP
Plekhb2	-1.07463	0.00101303	0.00954157	DOWN
Vmn2r73	2.43743	0.00101615	0.00956533	UP
Rbms1	1.22808	0.00101826	0.00957949	UP
Dpep2	2.38706	0.00102216	0.00961049	UP
Vdr	3.12898	0.00102281	0.00961094	UP
Il13ra1	1.05558	0.00102771	0.00965121	UP
Neurl4	-1.46532	0.00102894	0.00965363	DOWN
Lmod2	-1.10564	0.00102918	0.00965363	DOWN
Acaa1a	-1.75949	0.0010344	0.00969692	DOWN
Rab3c	2.89291	0.00103502	0.00969695	UP
Per1	1.4672	0.00103765	0.0097159	UP
Dpysl2	-1.11585	0.00103921	0.0097248	DOWN
Pbxip1	-1.34841	0.00104727	0.00979448	DOWN
Olfr639	1.95976	0.00105002	0.00981437	UP
Prkag1	-1.17055	0.00105121	0.00981973	DOWN
Fam160a1	-1.25214	0.001053	0.00982633	DOWN
Armc9	2.98038	0.00105315	0.00982633	UP
Acsl1	-0.97066	0.00106582	0.00993806	DOWN
Mrm3	-1.47083	0.00106638	0.00993806	DOWN
Olfr373	3.13473	0.00106734	0.00994125	UP
Hhatl	-1.36268	0.00106914	0.00994849	DOWN
Nts	2.64242	0.00106937	0.00994849	UP
Ryr2	-0.972098	0.00107313	0.00997764	DOWN
Srpx	-1.68336	0.00107439	0.00998343	DOWN
Taf1d	4.29259	0.00107784	0.0100097	UP
Soat1	1.37099	0.00108258	0.0100478	UP
Pik3ap1	1.90945	0.00108557	0.0100697	UP
Kptn	-2.03055	0.00108824	0.0100886	DOWN
Mfsd4b3-ps	-2.67973	0.00108911	0.0100908	DOWN
Nacc2	-1.22604	0.00109005	0.0100936	DOWN
Olfr1175-ps	2.20032	0.00109372	0.0101217	UP
Drap1	-1.31593	0.00109489	0.0101267	DOWN
Sdha	-1.05998	0.00110573	0.0102209	DOWN
Rph3a	4.19791	0.00110705	0.0102248	UP
Tmem65	-1.12296	0.00110802	0.0102248	DOWN
Cnr2	2.36372	0.00110808	0.0102248	UP
Olfr1226	3.28903	0.00111505	0.0102832	UP
A430089I19Rik	7.39205	0.00112128	0.0103346	UP
Mob3a	1.5905	0.001122	0.0103352	UP
Dkc1	1.50607	0.00112324	0.0103407	UP
Cul9	-1.6312	0.00113058	0.0104023	DOWN
Osbpl6	-1.58007	0.00113465	0.0104337	DOWN
Ppdpf	-1.82476	0.00113869	0.0104648	DOWN
Snx19	-1.23452	0.00114423	0.0105096	DOWN
Akt2	-1.18698	0.00114716	0.0105304	DOWN
Ccl21a	-1.84779	0.00114905	0.0105417	DOWN
Mccc1	-1.48487	0.00115102	0.0105482	DOWN
Hist1h2bc	-1.31873	0.00115168	0.0105482	DOWN
Suco	1.17004	0.00115175	0.0105482	UP
Abce1	1.05149	0.00115672	0.0105877	UP
Trim16	1.54646	0.00115977	0.0106095	UP
Manba	-1.459	0.00116081	0.0106128	DOWN
Tmprss11b	3.25111	0.00116162	0.0106141	UP
Rgs2	-1.28216	0.00116303	0.0106182	DOWN
Oaz1	-1.35583	0.0011634	0.0106182	DOWN
Marcksl1	2.08279	0.00117234	0.0106936	UP
Vmn1r87	1.96972	0.0011734	0.0106972	UP
Cdk6	1.28531	0.00117502	0.0107058	UP
Dnpep	-1.19256	0.00117643	0.0107125	DOWN
U2af1l4	-1.59425	0.00117763	0.0107173	DOWN
Fabp4	1.04977	0.00117906	0.0107242	UP
Hc	4.87389	0.00118921	0.0108103	UP
Fbh1	-1.1111	0.0011902	0.0108106	DOWN
Olfr1196	2.98571	0.0011906	0.0108106	UP
Cacng4	3.55691	0.00119546	0.0108471	UP
Dnajb5	-1.38634	0.00119598	0.0108471	DOWN
mt-Co1	0.99943	0.00119948	0.0108726	UP
Olfr1120	2.25319	0.00120216	0.0108907	UP
Gm1043	7.50455	0.00120655	0.0109242	UP
Entpd4b	-1.22219	0.00120918	0.0109418	DOWN
Mrpl28	-1.3343	0.00121909	0.0110252	DOWN
Bag6	-1.31639	0.00122044	0.0110312	DOWN
Olfr45	2.00746	0.00122297	0.0110452	UP
Lpgat1	-1.01945	0.00122338	0.0110452	DOWN
Etfdh	-0.897765	0.00123175	0.0111144	DOWN
Idh3b	-0.973718	0.00123789	0.0111635	DOWN
Pgls	-1.42196	0.00123961	0.0111726	DOWN
Cbx7	-2.30219	0.00124207	0.0111885	DOWN
Tspan4	1.52698	0.00124392	0.0111988	UP
Mrps31	-1.25094	0.00124626	0.0112136	DOWN
Alpk2	-1.02491	0.00124931	0.0112346	DOWN
Park7	-1.0847	0.00125266	0.0112584	DOWN
Mgam	2.34782	0.00125384	0.0112626	UP
Gusb	-1.47763	0.00125743	0.0112826	DOWN
Nudt13	-1.73676	0.00125749	0.0112826	DOWN
Wdtc1	-1.52541	0.00125902	0.0112852	DOWN
Nedd4	-0.904689	0.00125919	0.0112852	DOWN
Olfr173	2.75344	0.00126021	0.0112879	UP
Nucb2	1.58282	0.00126476	0.0113223	UP
Hnrnpa3	1.01447	0.00126707	0.0113366	UP
Polr2m	-1.14463	0.00127158	0.0113705	DOWN
Tex261	-1.17913	0.00127376	0.0113836	DOWN
Etfa	-1.07107	0.00127755	0.0114049	DOWN
Rbm47	1.91629	0.00127819	0.0114049	UP
Etfbkmt	-1.56878	0.00127829	0.0114049	DOWN
Echs1	-1.09019	0.00128022	0.0114157	DOWN
Rab1b	-1.22261	0.00128778	0.0114767	DOWN
Gm8251	3.21609	0.00129133	0.0115019	UP
Myo15	4.68025	0.00129507	0.0115287	UP
Mrpl13	-1.25047	0.0013029	0.0115914	DOWN
Tmem45a	1.86632	0.00130357	0.0115914	UP
Olfr338	2.25336	0.00130478	0.0115957	UP
Ybx2	-2.50893	0.00130693	0.0116083	DOWN
Armc1	-1.17809	0.00130768	0.0116085	DOWN
Fjx1	3.56776	0.00131193	0.0116397	UP
Gm21874	4.46963	0.001316	0.0116693	UP
Tmem250-ps	-1.41225	0.00131754	0.0116764	DOWN
Vmn2r69	2.17717	0.00132214	0.0117107	UP
Dnajc11	-1.14101	0.00132508	0.0117302	DOWN
Fabp3	-0.920974	0.00132961	0.0117638	DOWN
Gnai3	1.12559	0.00133214	0.0117796	UP
Fcgr4	1.95648	0.00133701	0.0118161	UP
Cd300a	1.75474	0.00134265	0.0118594	UP
Paics	-0.957139	0.00134815	0.0119013	DOWN
Vmn1r230	2.68284	0.00134906	0.0119018	UP
Ptpn7	2.34882	0.00134971	0.0119018	UP
Olfr769	1.66192	0.00135094	0.0119061	UP
Aldh1b1	-1.89504	0.00136167	0.0119882	DOWN
Dbn1	2.07467	0.00136177	0.0119882	UP
Il10ra	1.72368	0.00136488	0.012009	UP
Ugcg	1.30758	0.00136576	0.0120101	UP
Tirap	1.46059	0.00136866	0.012029	UP
Wdr20rt	3.36532	0.00137029	0.0120366	UP
Tmem70	-1.17274	0.00137575	0.0120779	DOWN
Cacna1b	4.00076	0.00137913	0.0121009	UP
Sema3f	1.68628	0.00138209	0.0121202	UP
Atpsckmt	-1.99142	0.00138857	0.0121702	DOWN
Vmn1r224	3.53034	0.00139314	0.0121892	UP
Lamp1	-1.07073	0.00139367	0.0121892	DOWN
Clrn1	2.49984	0.00139432	0.0121892	UP
Ccdc88b	2.3392	0.00139546	0.0121892	UP
Mipep	-1.10996	0.0013957	0.0121892	DOWN
Hccs	-1.16372	0.00139601	0.0121892	DOWN
Twf2	-1.00347	0.0013967	0.0121892	DOWN
Col15a1	-1.21893	0.00139686	0.0121892	DOWN
Glrx5	-1.40706	0.00140059	0.0122151	DOWN
Gm10563	3.00799	0.00140387	0.0122369	UP
Lsm14b	-1.42986	0.00140613	0.0122454	DOWN
Emcn	1.12621	0.00140638	0.0122454	UP
Cilp	-1.5531	0.00140921	0.0122633	DOWN
Spata13	1.38718	0.0014124	0.0122843	UP
Itgb2l	4.71669	0.00141444	0.0122954	UP
Dusp18	-1.28255	0.00141629	0.0123047	DOWN
Tspoap1	5.34254	0.00141807	0.0123134	UP
Fcna	-2.3376	0.00142039	0.0123269	DOWN
Decr2	-1.58978	0.00142502	0.0123554	DOWN
Rnf214	-1.68378	0.00142524	0.0123554	DOWN
Baz2b	1.09535	0.00142792	0.0123719	UP
Mcur1	-1.17285	0.00143016	0.0123846	DOWN
Mapkapk3	-1.68835	0.00143294	0.0124019	DOWN
Rnf19a	1.14578	0.00143891	0.0124428	UP
Fgf13	-1.25226	0.00143923	0.0124428	DOWN
Pnpla7	-1.37953	0.001444	0.0124773	DOWN
Olfr472	2.16635	0.00144638	0.012491	UP
Nprl2	-1.83027	0.00145335	0.0125444	DOWN
Cmah	1.78738	0.00145961	0.0125854	UP
Slc36a2	-1.8499	0.00145968	0.0125854	DOWN
Spns1	-1.93032	0.00146176	0.0125965	DOWN
Irx4	-1.81385	0.00146286	0.0125991	DOWN
Abcd1	-1.36006	0.00146546	0.0126147	DOWN
Ptbp2	1.13204	0.00146915	0.0126396	UP
Coq7	-1.20674	0.00147439	0.0126778	DOWN
Cyp2j13	3.32403	0.00148056	0.012724	UP
Mast4	1.13217	0.00150245	0.0129052	UP
Rxrb	-1.44457	0.00150436	0.0129146	DOWN
Gsn	-1.27015	0.00151252	0.0129777	DOWN
Olfr523	3.63269	0.00152239	0.0130553	UP
Fah	-1.46931	0.00152323	0.0130554	DOWN
Serf2	-1.10022	0.00152411	0.0130559	DOWN
Olfr1160	2.2147	0.00153089	0.013107	UP
Gpr84	7.12967	0.00155138	0.0132681	UP
1700109H08Rik	7.12967	0.00155138	0.0132681	UP
Olfr1309	3.37086	0.00155431	0.0132808	UP
Olfr73	3.40264	0.0015547	0.0132808	UP
4932415D10Rik	3.8647	0.00155586	0.0132808	UP
Uqcrc2	-0.877536	0.0015562	0.0132808	DOWN
Mta1	-1.55169	0.00156335	0.0133346	DOWN
Nadk2	-1.13974	0.0015695	0.0133799	DOWN
Adck1	-1.39852	0.0015714	0.0133889	DOWN
Aox2	4.85058	0.00157592	0.0134153	UP
Pprc1	1.58229	0.00157619	0.0134153	UP
Eif4ebp1	1.07464	0.00157834	0.0134265	UP
Slc2a3	2.1201	0.0015823	0.0134529	UP
Zfp775	-1.80483	0.00158887	0.0135015	DOWN
Zan	4.21033	0.00159012	0.013505	UP
Cd300ld3	-3.52938	0.00159256	0.0135184	DOWN
Aldh6a1	-0.940608	0.0015953	0.0135345	DOWN
Nktr	1.06723	0.00159956	0.0135599	UP
Rasgrf1	3.7657	0.00160027	0.0135599	UP
Gmip	1.74138	0.00160085	0.0135599	UP
Olfr147	2.26481	0.00160445	0.0135754	UP
Sec24b	1.31179	0.00160477	0.0135754	UP
Rhbdd3	-1.78674	0.00160525	0.0135754	DOWN
Asb18	-1.68331	0.00160832	0.0135942	DOWN
Ccdc85c	-1.66698	0.00160959	0.0135977	DOWN
Mobp	3.8817	0.00161395	0.0136243	UP
Bola1	-1.80449	0.00161446	0.0136243	DOWN
Nom1	1.22173	0.00161738	0.0136418	UP
Ccr9	2.47156	0.00162147	0.013669	UP
Ube2b	-0.958049	0.00162613	0.0137011	DOWN
Pappa	1.94702	0.00162785	0.0137083	UP
Zswim4	1.74826	0.00163314	0.0137455	UP
Slc25a38	-1.77812	0.00163962	0.0137928	DOWN
Vmn1r13	1.96717	0.00164289	0.0138129	UP
Olfr628	3.22141	0.00165135	0.0138767	UP
Habp4	-1.46353	0.00165294	0.0138828	DOWN
Olfr720	2.98481	0.00165459	0.0138893	UP
Hand2	-1.46347	0.00165908	0.0139197	DOWN
Dmpk	-1.44384	0.00166168	0.0139341	DOWN
Acadm	-0.886888	0.00166319	0.0139394	DOWN
Clybl	-1.13831	0.00166497	0.0139401	DOWN
Rex1bd	-1.45282	0.00166547	0.0139401	DOWN
Mroh2a	2.64352	0.00166591	0.0139401	UP
Gm14496	2.18522	0.00166881	0.0139571	UP
Hsf1	-1.766	0.00167369	0.0139905	DOWN
Frem3	7.31333	0.00167522	0.013996	UP
Serpina10	5.10758	0.0016761	0.013996	UP
Ndufab1	-1.05026	0.0016874	0.014083	DOWN
Micos10	-1.42794	0.00168921	0.0140839	DOWN
Gns	-1.18706	0.00168928	0.0140839	DOWN
Gna11	-1.30532	0.00169116	0.0140921	DOWN
Nicn1	-1.69083	0.00170143	0.0141703	DOWN
Sdf2	-1.29573	0.00170341	0.014178	DOWN
Hsp90ab1	-1.03284	0.00170414	0.014178	DOWN
Dio2	1.97543	0.00170734	0.0141972	UP
Rimbp2	2.45096	0.0017147	0.0142509	UP
Vmn1r6	2.12962	0.00171849	0.0142749	UP
Mterf2	-1.53925	0.00171988	0.014279	DOWN
Ypel2	-1.453	0.00172109	0.0142816	DOWN
Erbin	0.949388	0.00172281	0.0142884	UP
Smim26	-1.60676	0.0017414	0.0144351	DOWN
Tlr4	1.06273	0.00174278	0.014439	UP
Phb2	-1.31322	0.00174618	0.0144568	DOWN
Alox5ap	1.56591	0.00174675	0.0144568	UP
BC003965	-1.31101	0.00177219	0.0146527	DOWN
Bnip1	-1.77642	0.00177226	0.0146527	DOWN
Olfr575	2.52615	0.00177367	0.0146567	UP
Apba3	-1.38362	0.00177515	0.0146614	DOWN
Abcc12	7.13885	0.00179505	0.0148173	UP
Vmn1r16	3.26247	0.00179648	0.0148173	UP
Phkg1	-1.78765	0.00179682	0.0148173	DOWN
Rnf114	-1.21657	0.00180343	0.014864	DOWN
Hist1h2af	-3.77472	0.00180608	0.0148782	DOWN
Olfr735	1.72262	0.00181568	0.0149439	UP
Fbxo44	-1.65076	0.00181593	0.0149439	DOWN
Olfr77	2.41583	0.00181854	0.0149554	UP
Arl3	-1.62411	0.00181922	0.0149554	DOWN
Taf6	-1.34402	0.00182223	0.0149666	DOWN
Gstm2	-1.05082	0.00182325	0.0149666	DOWN
Atp6v0a2	-1.23178	0.00182341	0.0149666	DOWN
Hist1h3h	-3.29435	0.00183841	0.015082	DOWN
Traf1	3.99446	0.00185416	0.0152033	UP
Rcn3	-1.45352	0.00185527	0.0152046	DOWN
Acot8	-4.27278	0.00185671	0.0152085	DOWN
Vmn1r226	2.68437	0.00186103	0.0152361	UP
Reep5	-1.07415	0.00186604	0.0152693	DOWN
Itm2b	-1.24558	0.00186768	0.0152731	DOWN
Lair1	1.97944	0.00186843	0.0152731	UP
Rnase4	-1.1522	0.00187153	0.0152872	DOWN
Pdpr	-0.993556	0.00187208	0.0152872	DOWN
Ptprj	1.18024	0.00188223	0.0153622	UP
Fam210a	-0.91217	0.00188393	0.0153682	DOWN
Dnah9	3.61534	0.00188594	0.0153709	UP
Laptm4b	-1.21182	0.0018862	0.0153709	DOWN
Slco2b1	-1.36298	0.00188949	0.0153899	DOWN
Fam220a	-1.28617	0.00189873	0.0154572	DOWN
Prox1	-1.03869	0.0019065	0.0155081	DOWN
Cers6	1.37175	0.00190693	0.0155081	UP
Olfr851	2.27333	0.00190977	0.0155232	UP
Higd2a	-1.19579	0.00191118	0.0155238	DOWN
Bcam	-1.18662	0.00191231	0.0155238	DOWN
AB124611	2.22458	0.00191344	0.0155238	UP
Dscam	5.44914	0.00191374	0.0155238	UP
Ltbp4	-1.38308	0.00191724	0.0155442	DOWN
Cap1	1.12656	0.00192139	0.0155699	UP
Fam110b	-1.94291	0.00192934	0.0156193	DOWN
Cd47	1.11308	0.00192944	0.0156193	UP
Paqr3	1.93316	0.00193759	0.0156772	UP
Lrp5	-1.74249	0.00194461	0.015726	DOWN
Eml4	1.43406	0.00194686	0.0157277	UP
Fkbp9	-1.10231	0.00194692	0.0157277	DOWN
Mrps24	-1.25308	0.00194817	0.0157277	DOWN
Akr7a5	-1.65495	0.00194878	0.0157277	DOWN
Pou1f1	3.61141	0.00195801	0.0157942	UP
Hist1h4d	-1.14021	0.00196017	0.0158036	DOWN
Mgrn1	-1.13238	0.00197097	0.0158826	DOWN
Zfp689	1.86367	0.00197261	0.0158878	UP
Lrrc20	-1.43438	0.00197744	0.0159187	DOWN
Enpp5	-1.68652	0.0019786	0.0159199	DOWN
Mrpl46	-1.29373	0.00199618	0.0160532	DOWN
Olfr432	3.37031	0.00200004	0.0160739	UP
Nr1h3	-1.54936	0.00200077	0.0160739	DOWN
Mid1	4.35066	0.0020018	0.016074	UP
Reg2	1.44984	0.00200746	0.0161114	UP
Acad8	-1.32418	0.00200915	0.0161168	DOWN
Cox7c	-0.885434	0.00201073	0.0161213	DOWN
Nckap1l	1.20386	0.00201191	0.0161227	UP
Gatd3a	-1.05044	0.00201714	0.0161564	DOWN
Zfp92	3.27516	0.00202141	0.0161825	UP
Ccr4	5.54946	0.0020231	0.0161879	UP
Disp2	3.94941	0.00202501	0.0161908	UP
Sgcb	-1.05099	0.00202551	0.0161908	DOWN
Tti1	-1.2372	0.00202892	0.0162099	DOWN
Ing4	-1.75761	0.00203242	0.0162298	DOWN
Exoc7	-1.3018	0.00203481	0.0162407	DOWN
Olfr1297	2.47976	0.00204386	0.0163047	UP
Hint3	-1.39133	0.00204906	0.016338	DOWN
Ttc30b	-1.70373	0.00205506	0.0163776	DOWN
Ggcx	-1.403	0.00206221	0.0164264	DOWN
Tmem132a	-1.9839	0.00206474	0.0164383	DOWN
Art1	-1.06974	0.00206709	0.0164488	DOWN
[truncated: 19,386 more rows]

## Sheet: GSE52313
Differential Expression Analysis						Functional Analysis: GO BP					Functional Analysis: KEGG Pathways
Gene name	L2FC	P-VALUE	P-ADJ	DIRECTION		Name	# of Genes	P-Adj	Direction		Name	# of Genes	P-Adj	Direction
Col12a1	4.87179	2.4993e-177	4.488e-173	UP		biotin metabolic process (GO:0006768)	10	0	DOWN		Alzheimer disease	162	0	DOWN
Nppa	4.40357	5.3293e-173	4.78491e-169	UP		extracellular matrix disassembly (GO:0022617)	73	0	UP		ECM-receptor interaction	83	0	UP
Serpina3n	3.01712	9.51507e-127	5.6954e-123	UP		mitochondrial respiratory chain complex assembly (GO:0033108)	95	0	DOWN		Cytokine-cytokine receptor interaction	259	0	UP
Crlf1	5.13589	1.17233e-116	5.26288e-113	UP		2-oxoglutarate metabolic process (GO:0006103)	17	0	DOWN		Phagosome	160	0	UP
Vcan	1.98932	2.80296e-109	1.00665e-105	UP		neutrophil mediated immunity (GO:0002446)	428	0	UP		Valine, leucine and isoleucine degradation	54	0	DOWN
Thbs4	4.18471	5.01149e-108	1.49985e-104	UP		fatty acid oxidation (GO:0019395)	48	0	DOWN		Protein digestion and absorption	84	0	UP
Lox	4.19425	5.8838e-108	1.50936e-104	UP		cytokine-mediated signaling pathway (GO:0019221)	537	0	UP		Citrate cycle (TCA cycle)	31	0	DOWN
Lrp8	3.64126	4.10317e-107	9.21009e-104	UP		mitochondrial ATP synthesis coupled electron transport (GO:0042775)	81	0	DOWN		Fatty acid degradation	47	0	DOWN
Dkk3	3.96954	1.07257e-104	2.14001e-101	UP		fatty acid catabolic process (GO:0009062)	61	0	DOWN		Huntington disease	181	0	DOWN
1500015O10Rik	5.40269	7.16559e-104	1.28673e-100	UP		fatty acid beta-oxidation (GO:0006635)	49	0	DOWN		Focal adhesion	197	0	UP
Saa3	4.13872	2.41336e-103	3.9397e-100	UP		mitochondrial translation (GO:0032543)	106	0	DOWN		Oxidative phosphorylation	116	0	DOWN
Col8a1	3.0998	3.51517e-100	5.26015e-97	UP		mitochondrial electron transport, NADH to ubiquinone (GO:0006120)	45	0	DOWN		Tryptophan metabolism	47	0	DOWN
Ltbp2	4.93302	5.14596e-99	7.10815e-96	UP		cellular amino acid catabolic process (GO:0009063)	23	0	DOWN		Thermogenesis	213	0	DOWN
Timp1	4.30015	3.98311e-98	5.10891e-95	UP		mitochondrial respiratory chain complex I biogenesis (GO:0097031)	62	0	DOWN		Pyruvate metabolism	38	0	DOWN
Postn	4.06089	9.12479e-90	1.09236e-86	UP		cellular respiration (GO:0045333)	56	0	DOWN		Propanoate metabolism	30	0	DOWN
Sprr1a	5.89292	9.63529e-89	1.08138e-85	UP		NADH dehydrogenase complex assembly (GO:0010257)	62	0	DOWN		Amoebiasis	94	0	UP
Ptn	3.28945	2.34961e-84	2.48188e-81	UP		mitochondrial transport (GO:0006839)	127	0	DOWN		Peroxisome	83	0	DOWN
C1qtnf3	5.67067	5.86847e-84	5.85445e-81	UP		alpha-amino acid catabolic process (GO:1901606)	38	0	DOWN		Parkinson disease	126	0	DOWN
Col8a2	5.12302	1.38419e-80	1.3082e-77	UP		translational termination (GO:0006415)	95	0	DOWN		PI3K-Akt signaling pathway	339	4.205e-15	UP
Mfap5	3.04058	4.61779e-78	4.14609e-75	UP		neutrophil degranulation (GO:0043312)	421	0	UP		Malaria	47	4.205e-15	UP
Selenbp1	-1.07004	2.96193e-75	2.53273e-72	DOWN		extracellular matrix organization (GO:0030198)	222	0	UP		Staphylococcus aureus infection	51	6.728e-15	UP
Pamr1	3.30366	3.34829e-75	2.73297e-72	UP		glycosaminoglycan catabolic process (GO:0006027)	55	0	UP		Regulation of actin cytoskeleton	213	6.728e-15	UP
Frzb	3.22635	9.60539e-75	7.49931e-72	UP		regulation of cell proliferation (GO:0042127)	674	0	UP		Glyoxylate and dicarboxylate metabolism	28	1.2938e-14	DOWN
Dbn1	1.91441	1.17087e-73	8.76057e-71	UP		inflammatory response (GO:0006954)	205	0	UP		Cell adhesion molecules (CAMs)	147	2.1407e-14	UP
Aspn	2.38784	2.27387e-70	1.63328e-67	UP		skeletal system development (GO:0001501)	137	0	UP		Human papillomavirus infection	333	4.205e-14	UP
Dio2	3.6922	4.10563e-70	2.83557e-67	UP		regulation of cell migration (GO:0030334)	300	0	UP		Non-alcoholic fatty liver disease (NAFLD)	141	1.1053e-13	DOWN
Scml4	2.07974	2.73511e-69	1.81905e-66	UP		branched-chain amino acid catabolic process (GO:0009083)	21	0	DOWN		Proteoglycans in cancer	199	9.1345e-12	UP
Emp1	2.24134	1.41815e-66	9.09492e-64	UP		mitochondrial translational termination (GO:0070126)	88	0	DOWN		Butanoate metabolism	27	6.503e-11	DOWN
Col5a2	3.09736	5.1775e-66	3.20595e-63	UP		mitochondrion organization (GO:0007005)	153	0	DOWN		beta-Alanine metabolism	32	2.1923e-10	DOWN
Scara5	-1.03151	3.18795e-65	1.9082e-62	DOWN		fatty acid beta-oxidation using acyl-CoA dehydrogenase (GO:0033539)	15	0	DOWN		Osteoclast differentiation	122	2.8423e-10	UP
Adamtsl2	2.67571	9.83724e-63	5.6983e-60	UP		neutrophil activation involved in immune response (GO:0002283)	424	0	UP		Leishmaniasis	65	5.2071e-10	UP
Tnc	4.23667	3.69097e-61	2.07121e-58	UP		respiratory electron transport chain (GO:0022904)	90	0	DOWN		AGE-RAGE signaling pathway in diabetic complications	100	7.5521e-10	UP
Tmem45a	2.3552	6.38266e-61	3.47313e-58	UP		mitochondrial translational elongation (GO:0070125)	87	0	DOWN		Hematopoietic cell lineage	89	3.3134e-09	UP
Sulf1	1.61861	2.63401e-59	1.39115e-56	UP		protein complex subunit organization (GO:0071822)	43	0	UP		Cardiac muscle contraction	73	3.3177e-09	DOWN
Tubb3	2.56014	3.77468e-58	1.93662e-55	UP		glycosaminoglycan biosynthetic process (GO:0006024)	97	0	UP		Tuberculosis	163	6.1811e-09	UP
Dclk1	1.81188	8.76858e-58	4.37382e-55	UP		cellular response to cytokine stimulus (GO:0071345)	392	0	UP		Fc gamma R-mediated phagocytosis	85	6.4262e-09	UP
Acan	4.29506	4.30989e-57	2.09169e-54	UP		branched-chain amino acid metabolic process (GO:0009081)	22	0	DOWN		Fatty acid elongation	29	7.894e-09	DOWN
Spp1	7.43629	3.45648e-55	1.63337e-52	UP		monocarboxylic acid metabolic process (GO:0032787)	95	0	DOWN		Rheumatoid arthritis	77	8.9654e-09	UP
Frem1	3.50699	8.73226e-55	4.02064e-52	UP		collagen fibril organization (GO:0030199)	29	0	UP		Aminoacyl-tRNA biosynthesis	44	1.4318e-08	DOWN
Slc1a3	2.20345	2.01072e-54	9.02661e-52	UP		translational elongation (GO:0006414)	102	0	DOWN		NF-kappa B signaling pathway	95	1.5388e-08	UP
Fmod	5.35508	2.66891e-54	1.16892e-51	UP		mitochondrial respiratory chain complex I assembly (GO:0032981)	62	0	DOWN		Chemokine signaling pathway	185	1.622e-08	UP
Mfap4	3.67778	2.8907e-54	1.23591e-51	UP		endoderm formation (GO:0001706)	36	3.5388e-14	UP		Complement and coagulation cascades	85	1.951e-08	UP
Matn4	4.21551	2.53399e-53	1.05821e-50	UP		translation (GO:0006412)	221	4.1942e-14	DOWN		Leukocyte transendothelial migration	108	2.0436e-08	UP
Ttc9	2.33513	3.26474e-53	1.33238e-50	UP		regulation of immune response (GO:0050776)	130	1.3323e-13	UP		Pertussis	73	2.4632e-08	UP
Col14a1	2.77034	3.59334e-53	1.4339e-50	UP		positive regulation of multicellular organismal process (GO:0051240)	191	1.5728e-13	UP		Relaxin signaling pathway	126	3.0206e-08	UP
Gcnt4	2.91669	1.07287e-52	4.18816e-50	UP		negative regulation of signal transduction (GO:0009968)	267	3.5761e-13	UP		Natural killer cell mediated cytotoxicity	104	3.2065e-08	UP
Pdgfrl	2.9621	2.66819e-52	1.01942e-49	UP		positive regulation of cell proliferation (GO:0008284)	387	3.9635e-13	UP		Pathways in cancer	517	4.2211e-08	UP
Cilp	3.81126	2.77523e-52	1.03823e-49	UP		inner mitochondrial membrane organization (GO:0007007)	34	5.0555e-13	DOWN		Glycolysis / Gluconeogenesis	65	6.874e-08	DOWN
Lgals3	3.69171	5.0106e-52	1.83623e-49	UP		positive regulation of protein phosphorylation (GO:0001934)	382	6.2014e-13	UP		Lysine degradation	58	9.1975e-08	DOWN
Itgbl1	2.79083	5.50246e-52	1.97615e-49	UP		endodermal cell differentiation (GO:0035987)	32	8.7506e-13	UP		Bacterial invasion of epithelial cells	74	2.1756e-07	UP
Enpp1	2.39853	2.34298e-51	8.2496e-49	UP		platelet degranulation (GO:0002576)	118	1.2063e-12	UP		MicroRNAs in cancer	142	2.9627e-07	UP
Loxl3	2.80149	1.1037e-50	3.81138e-48	UP		positive regulation of epithelial to mesenchymal transition (GO:0010718)	38	4.6241e-12	UP		Inflammatory bowel disease (IBD)	56	5.679e-07	UP
Fstl1	2.64838	9.99235e-50	3.38552e-47	UP		cell-matrix adhesion (GO:0007160)	86	8.8782e-12	UP		TNF signaling pathway	108	6.537e-07	UP
Nupr1	2.65057	1.56538e-48	5.20546e-46	UP		positive regulation of cell migration (GO:0030335)	208	9.8434e-12	UP		TGF-beta signaling pathway	90	6.6315e-07	UP
Svep1	1.86357	2.54549e-48	8.3108e-46	UP		ATP metabolic process (GO:0046034)	54	2.093e-11	DOWN		Hippo signaling pathway	158	6.6713e-07	UP
Kcne1	1.45738	3.47453e-48	1.11414e-45	UP		positive regulation of peptidyl-tyrosine phosphorylation (GO:0050731)	104	2.5165e-11	UP		Human cytomegalovirus infection	228	6.7199e-07	UP
Adamts2	2.28786	4.55385e-48	1.43462e-45	UP		regulation of peptidyl-tyrosine phosphorylation (GO:0050730)	76	3.5651e-11	UP		Cysteine and methionine metabolism	49	7.1916e-07	DOWN
Lpar1	1.28215	5.36563e-48	1.66122e-45	UP		leucine metabolic process (GO:0006551)	7	6.0038e-11	DOWN		Glutathione metabolism	62	1.039e-06	DOWN
Cilp2	4.55311	5.89835e-48	1.7952e-45	UP		positive regulation of intracellular signal transduction (GO:1902533)	444	1.0254e-10	UP		C-type lectin receptor signaling pathway	108	1.1771e-06	UP
Atp6v0a4	4.73344	1.00299e-47	3.00179e-45	UP		regulation of MAPK cascade (GO:0043408)	190	1.2462e-10	UP		Chemical carcinogenesis	67	1.8893e-06	DOWN
St14	3.28999	1.32056e-46	3.88741e-44	UP		positive regulation of MAPK cascade (GO:0043410)	255	1.3476e-10	UP		Selenocompound metabolism	17	2.6645e-06	DOWN
Eln	3.34488	1.42528e-46	4.12803e-44	UP		cristae formation (GO:0042407)	25	1.5575e-10	DOWN		Transcriptional misregulation in cancer	176	3.0131e-06	UP
Nkd2	2.92354	1.49657e-46	4.26571e-44	UP		skin development (GO:0043588)	64	2.2771e-10	UP		Small cell lung cancer	92	3.0475e-06	UP
Actn1	1.08888	2.0516e-46	5.75634e-44	UP		regulated exocytosis (GO:0045055)	142	2.3597e-10	UP		Rap1 signaling pathway	204	3.3383e-06	UP
Ccn4	3.24487	1.37815e-45	3.80731e-43	UP		protein targeting to mitochondrion (GO:0006626)	50	3.496e-10	DOWN		Epstein-Barr virus infection	200	3.3383e-06	UP
Snai3	-1.43741	4.12351e-45	1.12191e-42	DOWN		integrin-mediated signaling pathway (GO:0007229)	57	3.9015e-10	UP		Platelet activation	121	6.6112e-06	UP
Fn1	2.63908	5.12748e-45	1.37424e-42	UP		regulation of angiogenesis (GO:0045765)	168	4.7861e-10	UP		Ribosome	129	6.6408e-06	DOWN
C1qtnf6	2.11032	1.09407e-44	2.88914e-42	UP		hematopoietic progenitor cell differentiation (GO:0002244)	22	5.7208e-10	UP		Kaposi sarcoma-associated herpesvirus infection	187	1.1826e-05	UP
Igf1	1.64262	1.1397e-44	2.96604e-42	UP		mitochondrial gene expression (GO:0140053)	45	5.7433e-10	DOWN		Chagas disease (American trypanosomiasis)	102	2.2318e-05	UP
Lum	1.81899	1.2219e-44	3.13453e-42	UP		phagocytosis (GO:0006909)	57	6.8285e-10	UP		Salmonella infection	76	3.1026e-05	UP
Cd72	1.93787	1.30586e-44	3.30273e-42	UP		keratan sulfate catabolic process (GO:0042340)	12	9.585e-10	UP		Toll-like receptor signaling pathway	88	3.1026e-05	UP
Ccn5	3.54615	1.62609e-44	4.05552e-42	UP		granulocyte chemotaxis (GO:0071621)	40	1.0351e-09	UP		Hepatitis B	153	4.3675e-05	UP
Col11a1	6.85875	2.20012e-43	5.41199e-41	UP		elastic fiber assembly (GO:0048251)	7	1.4351e-09	UP		Apoptosis	139	0.00014213	UP
Sema3d	1.9862	3.29318e-43	7.9913e-41	UP		acyl-CoA metabolic process (GO:0006637)	36	1.5985e-09	DOWN		Fructose and mannose metabolism	35	0.00015639	DOWN
Col1a2	2.85559	5.8528e-43	1.40132e-40	UP		regulation of T cell proliferation (GO:0042129)	51	1.7137e-09	UP		Spliceosome	130	0.00018576	DOWN
Ccn2	3.04488	6.58197e-43	1.55516e-40	UP		positive regulation of cell differentiation (GO:0045597)	178	1.8982e-09	UP		Histidine metabolism	23	0.00021221	DOWN
Penk	-2.09642	6.86202e-43	1.60028e-40	DOWN		transmembrane receptor protein tyrosine kinase signaling pathway (GO:0007169)	384	1.9048e-09	UP		Ras signaling pathway	225	0.00023414	UP
Sfrp1	2.13698	1.41231e-42	3.2514e-40	UP		regulation of inflammatory response (GO:0050727)	141	1.9073e-09	UP		Human immunodeficiency virus 1 infection	210	0.00025026	UP
Fzd1	1.55545	1.69142e-42	3.84467e-40	UP		regulation of epithelial to mesenchymal transition (GO:0010717)	64	2.1897e-09	UP		Axon guidance	180	0.0003179	UP
Gpr176	3.59791	5.19497e-42	1.16608e-39	UP		mRNA processing (GO:0006397)	274	2.2851e-09	DOWN		Adherens junction	72	0.00051883	UP
Gdf6	2.91048	6.07228e-42	1.34617e-39	UP		pyruvate metabolic process (GO:0006090)	44	2.3521e-09	DOWN		Drug metabolism	104	0.00057779	DOWN
Ptx3	2.94069	1.05118e-41	2.30196e-39	UP		acetyl-CoA biosynthetic process (GO:0006085)	6	2.689e-09	DOWN		African trypanosomiasis	36	0.00057992	UP
Col22a1	2.3833	1.60238e-41	3.46674e-39	UP		positive regulation of cell motility (GO:2000147)	166	4.0621e-09	UP		Human T-cell leukemia virus 1 infection	227	0.00059555	UP
Fbln5	1.82862	1.62318e-41	3.46993e-39	UP		short-chain fatty acid metabolic process (GO:0046459)	8	4.5441e-09	DOWN		NOD-like receptor signaling pathway	154	0.00064342	UP
Col16a1	2.99741	3.84572e-41	8.12443e-39	UP		mitochondrial ATP synthesis coupled proton transport (GO:0042776)	19	5.1624e-09	DOWN		Glycosaminoglycan biosynthesis	53	0.00064342	UP
Col9a2	3.71403	4.96946e-41	1.03763e-38	UP		aerobic respiration (GO:0009060)	27	5.3844e-09	DOWN		Metabolism of xenobiotics by cytochrome P450	55	0.0007376	DOWN
Mmp2	1.99958	6.27022e-41	1.29419e-38	UP		gene expression (GO:0010467)	392	6.2546e-09	DOWN		IL-17 signaling pathway	85	0.0010207	UP
Fam180a	3.32755	7.47184e-41	1.52468e-38	UP		positive regulation of signal transduction (GO:0009967)	199	6.2593e-09	UP		Lysosome	123	0.0010605	UP
Serinc2	2.9605	8.96723e-41	1.80927e-38	UP		dicarboxylic acid metabolic process (GO:0043648)	57	7.5977e-09	DOWN		Toxoplasmosis	106	0.0011051	UP
Tmem119	2.73976	1.17624e-40	2.34686e-38	UP		response to molecule of bacterial origin (GO:0002237)	86	8.0301e-09	UP		Mucin type O-glycan biosynthesis	28	0.0011495	UP
S100a4	1.9117	2.09624e-40	4.1365e-38	UP		neutrophil chemotaxis (GO:0030593)	38	8.0301e-09	UP		Herpes simplex virus 1 infection	398	0.0014214	UP
Csf2rb2	2.46954	5.03845e-40	9.83428e-38	UP		response to cytokine (GO:0034097)	132	8.8493e-09	UP		p53 signaling pathway	71	0.0014214	UP
Adamts8	2.81995	9.10928e-40	1.75888e-37	UP		mRNA splicing, via spliceosome (GO:0000398)	255	8.8888e-09	DOWN		Primary immunodeficiency	35	0.0015551	UP
Panx1	1.68736	9.93661e-40	1.89821e-37	UP		neutrophil migration (GO:1990266)	42	9.5463e-09	UP		Legionellosis	57	0.0018516	UP
Ssc5d	2.05435	1.06174e-39	2.00692e-37	UP		positive regulation of cellular process (GO:0048522)	473	1.5991e-08	UP		Graft-versus-host disease	48	0.001981	UP
Ereg	2.86841	1.11982e-39	2.09465e-37	UP		negative regulation of cytokine secretion (GO:0050710)	35	2.0556e-08	UP		MAPK signaling pathway	290	0.001981	UP
Ctsk	2.37343	1.1441e-39	2.118e-37	UP		positive regulation of cytokine production (GO:0001819)	200	2.4636e-08	UP		Alanine, aspartate and glutamate metabolism	35	0.0024932	DOWN
Ism1	2.41586	1.35678e-39	2.48609e-37	UP		response to lipopolysaccharide (GO:0032496)	134	2.4636e-08	UP		RNA transport	161	0.0025968	DOWN
Mgp	1.9707	1.82361e-39	3.30773e-37	UP		extracellular matrix assembly (GO:0085029)	16	2.4814e-08	UP		Measles	132	0.0026749	UP
Adcy7	1.98517	2.01702e-39	3.62195e-37	UP		chondroitin sulfate biosynthetic process (GO:0030206)	19	3.0695e-08	UP		Basal cell carcinoma	63	0.0026749	UP
Comp	5.75236	2.27451e-39	4.02245e-37	UP		purine ribonucleoside triphosphate biosynthetic process (GO:0009206)	25	3.6175e-08	DOWN		Endocytosis	254	0.0029648	UP
Cemip	6.40009	2.28485e-39	4.02245e-37	UP		dermatan sulfate biosynthetic process (GO:0030208)	12	3.8103e-08	UP		Terpenoid backbone biosynthesis	22	0.0030876	DOWN
Myh7	3.07569	2.64029e-39	4.60308e-37	UP		regulation of neutrophil chemotaxis (GO:0090022)	25	4.739e-08	UP		Glycosphingolipid biosynthesis	44	0.003467	UP
Col1a1	3.21679	5.31518e-39	9.17738e-37	UP		RNA splicing, via transesterification reactions with bulged adenosine as nucleophile (GO:0000377)	232	4.8249e-08	DOWN		Prostate cancer	96	0.0036803	UP
P4ha3	4.12116	2.81763e-38	4.81869e-36	UP		glutathione metabolic process (GO:0006749)	45	4.8438e-08	DOWN		Cell cycle	123	0.0037674	UP
Ces1d	-2.24836	9.43661e-38	1.59862e-35	DOWN		mesenchymal cell differentiation (GO:0048762)	41	4.9678e-08	UP		Hedgehog signaling pathway	44	0.0043021	UP
Clec11a	3.02683	9.6201e-38	1.61447e-35	UP		regulation of apoptotic process (GO:0042981)	763	5.2425e-08	UP		Breast cancer	146	0.0046164	UP
Klhl29	2.0637	1.98697e-37	3.3037e-35	UP		positive regulation of neutrophil migration (GO:1902624)	21	5.2706e-08	UP		Phospholipase D signaling pathway	146	0.0047212	UP
Olfml2b	1.70569	3.29902e-37	5.43491e-35	UP		enzyme linked receptor protein signaling pathway (GO:0007167)	116	5.8268e-08	UP		Glucagon signaling pathway	97	0.0060403	DOWN
Krt18	3.41547	5.83266e-37	9.52155e-35	UP		tRNA aminoacylation for protein translation (GO:0006418)	46	5.8534e-08	DOWN		Hypertrophic cardiomyopathy (HCM)	86	0.0063977	UP
Ms4a7	2.5121	6.38847e-37	1.03349e-34	UP		regulation of interleukin-8 secretion (GO:2000482)	20	1.0262e-07	UP		Intestinal immune network for IgA production	41	0.0070213	UP
Mmp23	1.98238	6.87385e-37	1.10209e-34	UP		ubiquinone biosynthetic process (GO:0006744)	15	1.0798e-07	DOWN		Influenza A	150	0.0071371	UP
Dram1	0.962665	7.37425e-37	1.17185e-34	UP		dermatan sulfate proteoglycan biosynthetic process (GO:0050651)	15	1.0923e-07	UP		Hepatitis C	143	0.0071371	UP
Aldh1a3	1.68579	9.5827e-37	1.50944e-34	UP		water-soluble vitamin metabolic process (GO:0006767)	69	1.1347e-07	DOWN		Retrograde endocannabinoid signaling	136	0.0072693	DOWN
Tnfrsf11b	4.62251	1.14332e-36	1.78527e-34	UP		cellular amide metabolic process (GO:0043603)	54	1.1393e-07	DOWN		Ubiquitin mediated proteolysis	137	0.0072693	DOWN
Lman1l	2.83332	1.43502e-36	2.22143e-34	UP		positive regulation of T cell proliferation (GO:0042102)	49	1.2157e-07	UP		Proteasome	46	0.007565	DOWN
Rai14	1.13877	1.4907e-36	2.28791e-34	UP		positive regulation of epithelial cell proliferation (GO:0050679)	100	1.2426e-07	UP		Synaptic vesicle cycle	76	0.0083168	UP
Bckdhb	-0.997093	2.94636e-36	4.48371e-34	DOWN		positive regulation of phosphatidylinositol 3-kinase signaling (GO:0014068)	50	1.6676e-07	UP		Gastric cancer	148	0.0090207	UP
Mme	-1.33936	9.73902e-36	1.46961e-33	DOWN		epithelial to mesenchymal transition (GO:0001837)	37	1.683e-07	UP		Glycine, serine and threonine metabolism	39	0.0091416	DOWN
Col5a1	2.26142	1.19091e-35	1.78209e-33	UP		dermatan sulfate metabolic process (GO:0030205)	13	1.7373e-07	UP		Estrogen signaling pathway	123	0.01081	UP
Prss23	1.61231	1.97106e-35	2.92515e-33	UP		purine ribonucleoside monophosphate biosynthetic process (GO:0009168)	37	1.8595e-07	DOWN		Chronic myeloid leukemia	76	0.011528	UP
Zfp185	2.34913	2.39808e-35	3.52969e-33	UP		coenzyme metabolic process (GO:0006732)	46	2.1857e-07	DOWN		JAK-STAT signaling pathway	145	0.012896	UP
Col27a1	1.77529	2.79507e-35	4.08057e-33	UP		short-chain fatty acid catabolic process (GO:0019626)	7	2.1926e-07	DOWN		B cell receptor signaling pathway	70	0.014646	UP
Nfkbiz	1.34947	4.33481e-35	6.27743e-33	UP		glutathione derivative metabolic process (GO:1901685)	21	2.6135e-07	DOWN		Allograft rejection	46	0.015553	UP
Acp5	3.40378	4.48259e-35	6.43951e-33	UP		glutathione derivative biosynthetic process (GO:1901687)	21	2.6135e-07	DOWN		Glycerolipid metabolism	61	0.01609	DOWN
Emb	2.18593	6.08147e-35	8.66706e-33	UP		ubiquinone metabolic process (GO:0006743)	14	3.4176e-07	DOWN		Antigen processing and presentation	72	0.016149	UP
Sdc1	1.81922	7.07283e-35	1.00005e-32	UP		quinone biosynthetic process (GO:1901663)	14	3.4176e-07	DOWN		Asthma	21	0.016149	UP
Dpysl3	1.50117	7.60214e-35	1.0665e-32	UP		regulation of insulin-like growth factor receptor signaling pathway (GO:0043567)	15	3.6456e-07	UP		Gap junction	85	0.016149	UP
Anxa1	1.65236	1.27326e-34	1.77239e-32	UP		regulation of ERK1 and ERK2 cascade (GO:0070372)	221	4.2466e-07	UP		Adrenergic signaling in cardiomyocytes	143	0.017363	DOWN
Pla2g4a	1.25205	1.61356e-34	2.22882e-32	UP		endocytosis (GO:0006897)	192	4.6373e-07	UP		Signaling pathways regulating pluripotency of stem cells	136	0.017971	UP
Fbln2	1.12472	1.91676e-34	2.62742e-32	UP		fatty acid metabolic process (GO:0006631)	94	4.8218e-07	DOWN		Viral myocarditis	70	0.019995	UP
Col2a1	7.20557	2.63225e-34	3.58086e-32	UP		regulation of protein tyrosine kinase activity (GO:0061097)	31	4.8865e-07	UP		Bladder cancer	39	0.023225	UP
Gcat	-1.52413	2.88362e-34	3.89332e-32	DOWN		negative regulation of cell migration (GO:0030336)	116	5.3423e-07	UP		Sphingolipid metabolism	48	0.024601	UP
Pdpn	1.85465	3.0316e-34	4.06257e-32	UP		positive regulation of T cell activation (GO:0050870)	57	5.35e-07	UP		Type I diabetes mellitus	52	0.024601	UP
Aldob	-3.05529	3.54451e-34	4.71473e-32	DOWN		positive regulation of leukocyte migration (GO:0002687)	28	5.7554e-07	UP		Morphine addiction	90	0.029301	UP
Ltbp3	1.37923	5.17208e-34	6.82905e-32	UP		protein ubiquitination (GO:0016567)	482	6.8761e-07	DOWN		Synthesis and degradation of ketone bodies	11	0.031186	DOWN
Ddah1	1.75412	6.62472e-34	8.68321e-32	UP		ATP biosynthetic process (GO:0006754)	29	8.1953e-07	DOWN		Porphyrin and chlorophyll metabolism	32	0.031186	DOWN
Scara3	1.92427	9.31214e-34	1.21172e-31	UP		oxidative phosphorylation (GO:0006119)	11	8.1953e-07	DOWN		Parathyroid hormone synthesis, secretion and action	104	0.033565	UP
Fbn1	2.38725	1.24992e-33	1.61473e-31	UP		Fc receptor mediated stimulatory signaling pathway (GO:0002431)	70	9.3786e-07	UP		Colorectal cancer	87	0.033565	UP
Gxylt2	2.42415	1.45058e-33	1.86058e-31	UP		hemopoiesis (GO:0030097)	70	9.3786e-07	UP		Systemic lupus erythematosus	123	0.033565	UP
Megf10	2.35239	1.70948e-33	2.1771e-31	UP		neuron projection morphogenesis (GO:0048812)	158	1.0736e-06	UP		PPAR signaling pathway	79	0.033973	DOWN
Nox4	3.38895	2.25782e-33	2.85519e-31	UP		positive regulation of JAK-STAT cascade (GO:0046427)	55	1.1755e-06	UP		Th17 cell differentiation	98	0.03593	UP
Slc16a3	1.835	2.77542e-33	3.48519e-31	UP		ATP synthesis coupled proton transport (GO:0015986)	24	1.192e-06	DOWN		Melanogenesis	98	0.036434	UP
Csf2rb	1.94052	4.12295e-33	5.14138e-31	UP		glucose metabolic process (GO:0006006)	59	1.192e-06	DOWN		Prion diseases	33	0.038486	UP
Slc41a2	1.62391	5.88796e-33	7.29174e-31	UP		keratan sulfate metabolic process (GO:0042339)	33	1.2002e-06	UP		Glycosaminoglycan degradation	21	0.03873	UP
Runx1	2.11975	6.05365e-33	7.44558e-31	UP		positive regulation of phosphorylation (GO:0042327)	195	1.3005e-06	UP		Pancreatic cancer	74	0.039576	UP
Il33	1.30572	7.41737e-33	9.0608e-31	UP		regulation of Wnt signaling pathway (GO:0030111)	103	1.4137e-06	UP		Arginine biosynthesis	19	0.040445	DOWN
Fstl3	2.00569	8.2309e-33	9.98664e-31	UP		gluconeogenesis (GO:0006094)	38	1.5515e-06	DOWN		Acute myeloid leukemia	68	0.040502	UP
Pak3	3.23322	1.27699e-32	1.53899e-30	UP		mitochondrial protein processing (GO:0034982)	9	1.5515e-06	DOWN		Viral carcinogenesis	213	0.044866	UP
Nlgn2	1.16116	1.43002e-32	1.71193e-30	UP		positive regulation of neutrophil chemotaxis (GO:0090023)	20	1.5919e-06	UP		Cytosolic DNA-sensing pathway	52	0.045102	UP
Fst	3.06227	1.5365e-32	1.82722e-30	UP		Fc-gamma receptor signaling pathway (GO:0038094)	69	1.5919e-06	UP		Other types of O-glycan biosynthesis	22	0.045985	UP
Piezo2	2.85876	2.28678e-32	2.70155e-30	UP		positive regulation of granulocyte chemotaxis (GO:0071624)	20	1.5919e-06	UP		Ubiquinone and other terpenoid-quinone biosynthesis	11	0.04657	DOWN
Serpinf1	1.99621	2.58616e-32	3.03527e-30	UP		chondroitin sulfate metabolic process (GO:0030204)	29	1.6434e-06	UP		Fatty acid biosynthesis	13	0.046895	DOWN
Ms4a6d	1.51981	2.60735e-32	3.04028e-30	UP		nucleotide-excision repair (GO:0006289)	102	1.6554e-06	DOWN		AMPK signaling pathway	123	0.04735	DOWN
Dok1	1.83889	2.71574e-32	3.14623e-30	UP		succinyl-CoA metabolic process (GO:0006104)	6	1.6573e-06	DOWN
Fcgr4	1.68869	2.97808e-32	3.42803e-30	UP		protein transmembrane import into intracellular organelle (GO:0044743)	42	1.6573e-06	DOWN
Ncam1	1.85473	4.30532e-32	4.92425e-30	UP		eye morphogenesis (GO:0048592)	19	1.7105e-06	UP
Orai2	1.55485	4.40577e-32	5.00724e-30	UP		mitochondrial electron transport, cytochrome c to oxygen (GO:0006123)	20	1.8688e-06	DOWN
Creb3l2	0.972341	4.7618e-32	5.37784e-30	UP		negative regulation of response to stimulus (GO:0048585)	117	1.9795e-06	UP
Nbl1	1.562	6.18728e-32	6.94406e-30	UP		negative regulation of extrinsic apoptotic signaling pathway (GO:2001237)	70	2.205e-06	UP
Dbt	-1.03906	9.06105e-32	1.01062e-29	DOWN		transmembrane receptor protein serine/threonine kinase signaling pathway (GO:0007178)	138	2.4949e-06	UP
Tcea3	-1.03582	9.33358e-32	1.0293e-29	DOWN		regulation of bone resorption (GO:0045124)	22	2.6712e-06	UP
Fndc1	1.90604	9.34323e-32	1.0293e-29	UP		cellular defense response (GO:0006968)	41	2.8866e-06	UP
Ngef	3.20094	9.42051e-32	1.03149e-29	UP		peptide biosynthetic process (GO:0043043)	160	3.2e-06	DOWN
Tlr13	1.50844	3.12224e-31	3.39794e-29	UP		regulation of release of sequestered calcium ion into cytosol by sarcoplasmic reticulum (GO:0010880)	22	3.3848e-06	DOWN
Sbno2	0.997952	3.58467e-31	3.8777e-29	UP		regulation of protein phosphorylation (GO:0001932)	243	4.3259e-06	UP
Tnmd	4.62491	4.18372e-31	4.49862e-29	UP		keratan sulfate biosynthetic process (GO:0018146)	28	4.5079e-06	UP
Bmp1	1.46459	4.21999e-31	4.51062e-29	UP		positive regulation of ERK1 and ERK2 cascade (GO:0070374)	178	4.5499e-06	UP
Ugt1a7c	1.63366	5.31378e-31	5.64613e-29	UP		connective tissue development (GO:0061448)	28	4.5499e-06	UP
Plekha4	1.96171	6.41647e-31	6.77768e-29	UP		cellular response to lipopolysaccharide (GO:0071222)	78	4.5499e-06	UP
Ccdc80	1.21413	6.46684e-31	6.79094e-29	UP		negative regulation of immune response (GO:0050777)	33	4.5499e-06	UP
Mdk	2.18947	1.01297e-30	1.05686e-28	UP		positive regulation of protein tyrosine kinase activity (GO:0061098)	28	4.7539e-06	UP
Bgn	2.17837	1.01819e-30	1.05686e-28	UP		positive regulation of leukocyte chemotaxis (GO:0002690)	52	4.7539e-06	UP
Anxa8	3.36422	1.24361e-30	1.28342e-28	UP		leukocyte adhesion to vascular endothelial cell (GO:0061756)	16	4.7957e-06	UP
Col18a1	1.73643	1.53317e-30	1.57321e-28	UP		leukocyte tethering or rolling (GO:0050901)	16	4.7957e-06	UP
Zdhhc2	1.47643	1.57006e-30	1.6019e-28	UP		leukocyte cell-cell adhesion (GO:0007159)	23	4.7957e-06	UP
Loxl1	2.24532	2.09234e-30	2.12272e-28	UP		positive regulation of lymphocyte proliferation (GO:0050671)	60	4.7957e-06	UP
Meox1	2.35231	2.19648e-30	2.21585e-28	UP		lymphocyte chemotaxis (GO:0048247)	30	5.094e-06	UP
Nlrc3	1.81289	2.66798e-30	2.67648e-28	UP		cartilage development (GO:0051216)	43	5.1174e-06	UP
Inmt	-2.27873	3.138e-30	3.1305e-28	DOWN		homotypic cell-cell adhesion (GO:0034109)	35	5.4015e-06	UP
Nipsnap2	-0.874139	4.35645e-30	4.32203e-28	DOWN		regulation of acetyl-CoA biosynthetic process from pyruvate (GO:0010510)	13	5.6295e-06	DOWN
Pde1a	1.00516	4.98352e-30	4.91699e-28	UP		regulation of acyl-CoA biosynthetic process (GO:0050812)	13	5.6295e-06	DOWN
Serpine2	1.51349	5.01828e-30	4.92422e-28	UP		tricarboxylic acid metabolic process (GO:0072350)	13	6.1548e-06	DOWN
Mmp19	1.48052	6.1437e-30	5.99579e-28	UP		negative regulation of angiogenesis (GO:0016525)	67	6.5666e-06	UP
Fibin	2.29035	7.42529e-30	7.20735e-28	UP		positive regulation of interleukin-6 production (GO:0032755)	40	6.6263e-06	UP
Tgfbi	0.893513	7.57483e-30	7.31297e-28	UP		apoptotic cell clearance (GO:0043277)	23	6.9681e-06	UP
Gpt	-1.12288	7.8594e-30	7.54712e-28	DOWN		positive regulation of phagocytosis (GO:0050766)	34	6.9681e-06	UP
Mmp14	2.23116	9.03329e-30	8.62824e-28	UP		Fc-gamma receptor signaling pathway involved in phagocytosis (GO:0038096)	68	6.9912e-06	UP
Star	2.00193	1.27594e-29	1.21228e-27	UP		chondroitin sulfate proteoglycan biosynthetic process (GO:0050650)	24	6.9912e-06	UP
Kctd15	1.55074	1.59907e-29	1.51129e-27	UP		regulation of cardiac muscle contraction by calcium ion signaling (GO:0010882)	20	7.0457e-06	DOWN
Etv4	2.26028	2.18274e-29	2.05211e-27	UP		negative regulation of T cell activation (GO:0050868)	29	7.0687e-06	UP
Slpi	3.88624	2.28922e-29	2.14102e-27	UP		mitochondrial RNA metabolic process (GO:0000959)	19	7.2675e-06	DOWN
Kcnj15	3.2001	2.30135e-29	2.14121e-27	UP		glycolytic process (GO:0006096)	21	7.8156e-06	DOWN
Sh3pxd2b	1.45416	2.77482e-29	2.56842e-27	UP		establishment of protein localization to mitochondrion (GO:0072655)	45	7.8156e-06	DOWN
Sept5	1.8581	3.59369e-29	3.30933e-27	UP		mitochondrial genome maintenance (GO:0000002)	13	7.9279e-06	DOWN
Sfrp2	4.61047	4.20411e-29	3.85169e-27	UP		negative regulation of interleukin-6 production (GO:0032715)	24	7.9513e-06	UP
Col24a1	4.65645	5.35145e-29	4.87797e-27	UP		regulation of MAP kinase activity (GO:0043405)	83	7.9513e-06	UP
Ano10	-1.07905	5.60307e-29	5.081e-27	DOWN		positive regulation of angiogenesis (GO:0045766)	98	8.4556e-06	UP
B4galnt1	2.2041	5.63078e-29	5.081e-27	UP		regulation of signal transduction (GO:0009966)	221	8.6698e-06	UP
Selp	3.24764	6.36921e-29	5.71859e-27	UP		platelet aggregation (GO:0070527)	31	8.6698e-06	UP
Efhd2	1.16537	7.89794e-29	7.05589e-27	UP		positive regulation of I-kappaB kinase/NF-kappaB signaling (GO:0043123)	151	8.7081e-06	UP
Gpr39	3.74115	9.1128e-29	8.10092e-27	UP		positive regulation of chemokine production (GO:0032722)	30	8.9659e-06	UP
1500009L16Rik	1.33415	9.81244e-29	8.6799e-27	UP		hexose biosynthetic process (GO:0019319)	40	9.2372e-06	DOWN
Tubb2b	1.64613	1.02903e-28	9.05803e-27	UP		lipid biosynthetic process (GO:0008610)	64	1.0103e-05	DOWN
Thbs3	1.8311	1.19059e-28	1.0429e-26	UP		glycosaminoglycan metabolic process (GO:0030203)	60	1.0365e-05	UP
Ttll1	-1.35495	1.40197e-28	1.2221e-26	DOWN		positive regulation of protein kinase activity (GO:0045860)	163	1.1253e-05	UP
Gstm1	-0.946363	1.61176e-28	1.39819e-26	DOWN		negative regulation of lymphocyte activation (GO:0051250)	18	1.1391e-05	UP
B4galt5	0.914194	1.71442e-28	1.48008e-26	UP		carnitine metabolic process (GO:0009437)	11	1.1734e-05	DOWN
Ptgis	1.59612	1.91022e-28	1.64124e-26	UP		vascular endothelial growth factor receptor signaling pathway (GO:0048010)	70	1.1868e-05	UP
Atp10a	1.40151	2.07907e-28	1.7778e-26	UP		negative regulation of interleukin-8 secretion (GO:2000483)	7	1.242e-05	UP
Loxl2	2.21604	2.60586e-28	2.2177e-26	UP		positive regulation of ossification (GO:0045778)	48	1.257e-05	UP
Fdft1	-1.03677	3.30803e-28	2.802e-26	DOWN		substrate adhesion-dependent cell spreading (GO:0034446)	32	1.291e-05	UP
Serpinb1c	4.54409	3.59699e-28	3.03244e-26	UP		cardiolipin acyl-chain remodeling (GO:0035965)	6	1.3242e-05	DOWN
Osmr	0.956815	4.11175e-28	3.45022e-26	UP		regulation of relaxation of cardiac muscle (GO:1901897)	6	1.3832e-05	DOWN
Rbp1	2.22592	4.3946e-28	3.67041e-26	UP		phagocytosis, engulfment (GO:0006911)	28	1.4194e-05	UP
Plek	1.24715	5.53643e-28	4.60267e-26	UP		ATP generation from ADP (GO:0006757)	22	1.4878e-05	DOWN
Nsmf	0.84189	7.61093e-28	6.29813e-26	UP		regulation of phosphatidylinositol 3-kinase signaling (GO:0014066)	76	1.4879e-05	UP
Ugdh	1.04772	9.35253e-28	7.70382e-26	UP		positive regulation of fibroblast proliferation (GO:0048146)	28	1.506e-05	UP
Zfp57	1.25315	1.02434e-27	8.39911e-26	UP		negative regulation of apoptotic process (GO:0043066)	452	1.506e-05	UP
Ptgfrn	0.759027	1.25787e-27	1.02671e-25	UP		positive regulation of myeloid leukocyte mediated immunity (GO:0002888)	8	1.506e-05	UP
Ece2	1.76355	1.28134e-27	1.04113e-25	UP		positive regulation of chemotaxis (GO:0050921)	40	1.5106e-05	UP
Il15	-1.15018	1.61971e-27	1.31014e-25	DOWN		regulation of epithelial cell proliferation (GO:0050678)	68	1.5106e-05	UP
Adam12	2.95383	1.75434e-27	1.41268e-25	UP		valine metabolic process (GO:0006573)	7	1.5421e-05	DOWN
Endod1	1.27916	1.78327e-27	1.42956e-25	UP		hematopoietic stem cell differentiation (GO:0060218)	6	1.5537e-05	UP
Rab7b	1.15136	1.81019e-27	1.44469e-25	UP		positive regulation of interleukin-8 production (GO:0032757)	39	1.5537e-05	UP
Plvap	1.89073	2.16312e-27	1.71873e-25	UP		positive regulation of protein secretion (GO:0050714)	74	1.5939e-05	UP
Abi3bp	1.86678	3.63924e-27	2.87885e-25	UP		chondrocyte differentiation (GO:0002062)	27	1.688e-05	UP
S100a11	1.35569	4.62402e-27	3.64182e-25	UP		Ras protein signal transduction (GO:0007265)	207	1.7463e-05	UP
Calcoco1	-0.655633	6.12253e-27	4.80097e-25	DOWN		negative regulation of blood vessel morphogenesis (GO:2000181)	63	1.8321e-05	UP
Cdh3	2.65038	6.71528e-27	5.24288e-25	UP		regulation of extrinsic apoptotic signaling pathway via death domain receptors (GO:1902041)	34	1.851e-05	UP
Mrpl39	-0.726403	7.15902e-27	5.56513e-25	DOWN		regulation of bone mineralization (GO:0030500)	47	1.8779e-05	UP
Mrc2	1.43791	7.88874e-27	6.10595e-25	UP		regulation of vascular endothelial growth factor production (GO:0010574)	26	1.9261e-05	UP
Phlda3	1.68594	7.97233e-27	6.14417e-25	UP		regulation of acute inflammatory response (GO:0002673)	46	2.0163e-05	UP
Chil1	5.27635	9.47384e-27	7.27016e-25	UP		receptor-mediated endocytosis (GO:0006898)	117	2.3622e-05	UP
Gstm7	-1.13064	1.05739e-26	8.07978e-25	DOWN		pattern recognition receptor signaling pathway (GO:0002221)	43	2.3622e-05	UP
Itih2	2.5094	1.0705e-26	8.14534e-25	UP		tRNA aminoacylation (GO:0043039)	40	2.4504e-05	DOWN
Smco1	-1.26427	1.32173e-26	1.00145e-24	DOWN		regulation of mast cell degranulation (GO:0043304)	13	2.6209e-05	UP
Sparc	2.06	1.37828e-26	1.03991e-24	UP		regulation of B cell differentiation (GO:0045577)	14	2.6209e-05	UP
Hhatl	-0.79374	1.62159e-26	1.21836e-24	DOWN		regulation of interleukin-6 production (GO:0032675)	40	2.705e-05	UP
Aebp1	1.6356	1.63486e-26	1.22321e-24	UP		coenzyme biosynthetic process (GO:0009108)	28	2.7351e-05	DOWN
Atp8b1	0.882994	1.98796e-26	1.48124e-24	UP		regulation of cell adhesion mediated by integrin (GO:0033628)	29	2.9269e-05	UP
Fgl2	1.48998	2.12039e-26	1.57338e-24	UP		nicotinamide nucleotide metabolic process (GO:0046496)	41	3.015e-05	DOWN
Adam8	3.2067	3.28031e-26	2.42405e-24	UP		negative regulation of endopeptidase activity (GO:0010951)	54	3.2628e-05	UP
Chrdl1	2.67045	3.9183e-26	2.88364e-24	UP		wound healing, spreading of cells (GO:0044319)	19	3.2628e-05	UP
Entpd1	0.841204	4.25956e-26	3.122e-24	UP		negative regulation of ATP metabolic process (GO:1903579)	12	3.2711e-05	DOWN
Nmnat3	-0.759838	5.09982e-26	3.72266e-24	DOWN		regulation of B cell receptor signaling pathway (GO:0050855)	16	3.444e-05	UP
Bst1	1.68501	5.43344e-26	3.95013e-24	UP		regulation of tumor necrosis factor production (GO:0032680)	59	3.4878e-05	UP
Ildr2	2.39533	7.44878e-26	5.39346e-24	UP		detection of molecule of bacterial origin (GO:0032490)	7	3.5268e-05	UP
Itga9	0.621033	8.08058e-26	5.82743e-24	UP		regulation of integrin-mediated signaling pathway (GO:2001044)	11	3.5268e-05	UP
Ankrd1	1.87338	8.2091e-26	5.89643e-24	UP		regulation of T cell activation (GO:0050863)	36	3.5346e-05	UP
Disp2	3.68784	9.38692e-26	6.71558e-24	UP		positive regulation of macromolecule metabolic process (GO:0010604)	262	3.5346e-05	UP
Csrp2	1.69671	9.82965e-26	7.0044e-24	UP		retinoid metabolic process (GO:0001523)	64	3.8191e-05	UP
Gpr153	1.24401	1.12402e-25	7.97791e-24	UP		T cell activation (GO:0042110)	67	3.8191e-05	UP
Dap	1.2907	1.30092e-25	9.19709e-24	UP		positive regulation of actin filament bundle assembly (GO:0032233)	42	4.0263e-05	UP
Efemp2	1.19918	1.32708e-25	9.34522e-24	UP		gland morphogenesis (GO:0022612)	6	4.2093e-05	UP
Col4a3	1.47942	1.40379e-25	9.84682e-24	UP		regulation of protein processing (GO:0070613)	51	4.4814e-05	UP
Cbx7	-0.737711	2.06542e-25	1.44314e-23	DOWN		cell-cell adhesion via plasma-membrane adhesion molecules (GO:0098742)	132	4.5135e-05	UP
Igfbp7	1.62848	2.09374e-25	1.45726e-23	UP		cell morphogenesis involved in neuron differentiation (GO:0048667)	95	4.9955e-05	UP
Map6	1.2639	2.27009e-25	1.5739e-23	UP		monocyte chemotaxis (GO:0002548)	26	5.0429e-05	UP
Fxyd5	1.37809	2.29998e-25	1.58849e-23	UP		regulation of monocyte chemotactic protein-1 production (GO:0071637)	7	5.1105e-05	UP
Egflam	-0.988255	2.37127e-25	1.62759e-23	DOWN		positive regulation of cytokine biosynthetic process (GO:0042108)	37	5.2511e-05	UP
Dpep2	2.29205	2.37472e-25	1.62759e-23	UP		Rho protein signal transduction (GO:0007266)	68	5.4114e-05	UP
Itih5	1.62475	2.49258e-25	1.70187e-23	UP		peroxisome organization (GO:0007031)	23	5.4398e-05	DOWN
Pi16	1.69303	2.54185e-25	1.72894e-23	UP		positive regulation of Ras protein signal transduction (GO:0046579)	39	5.5539e-05	UP
Ak5	4.42553	3.07461e-25	2.08343e-23	UP		cellular response to transforming growth factor beta stimulus (GO:0071560)	99	5.578e-05	UP
Fxyd6	1.75738	3.83633e-25	2.58981e-23	UP		cellular response to BMP stimulus (GO:0071773)	83	5.6062e-05	UP
Cxcl5	3.59694	3.93941e-25	2.64944e-23	UP		cellular response to molecule of bacterial origin (GO:0071219)	71	5.6841e-05	UP
Cdkn2b	2.42494	4.7455e-25	3.17966e-23	UP		wound healing (GO:0042060)	44	5.9417e-05	UP
Oard1	-0.650825	4.88953e-25	3.26399e-23	DOWN		muscle cell migration (GO:0014812)	9	6.2952e-05	UP
Armc2	-1.43038	5.40035e-25	3.59164e-23	DOWN		hyaluronan metabolic process (GO:0030212)	20	6.3681e-05	UP
Klhl33	-1.7194	6.01858e-25	3.98803e-23	DOWN		negative regulation of toll-like receptor signaling pathway (GO:0034122)	28	6.3939e-05	UP
Ackr2	1.58633	6.51024e-25	4.29795e-23	UP		positive regulation of inflammatory response (GO:0050729)	62	6.4201e-05	UP
Lhfp	1.16102	7.49867e-25	4.93237e-23	UP		negative regulation of myeloid leukocyte differentiation (GO:0002762)	22	6.4201e-05	UP
Ctss	1.89716	8.04027e-25	5.26931e-23	UP		regulation of platelet aggregation (GO:0090330)	14	6.8063e-05	UP
Slco2a1	1.5161	9.03382e-25	5.89892e-23	UP		positive regulation of leukocyte degranulation (GO:0043302)	10	7.0353e-05	UP
Srpx2	1.85245	9.90691e-25	6.44559e-23	UP		chemokine-mediated signaling pathway (GO:0070098)	35	7.0353e-05	UP
Dio3	3.54068	1.08715e-24	7.02972e-23	UP		cellular macromolecule biosynthetic process (GO:0034645)	351	7.2009e-05	DOWN
Capg	1.63999	1.0883e-24	7.02972e-23	UP		ribonucleoprotein complex assembly (GO:0022618)	148	7.2009e-05	DOWN
Rtn4	1.32326	1.15529e-24	7.43565e-23	UP		transcription-coupled nucleotide-excision repair (GO:0006283)	71	7.2009e-05	DOWN
Armh4	-0.949111	1.23385e-24	7.91296e-23	DOWN		peptide metabolic process (GO:0006518)	95	7.9747e-05	DOWN
Pam	0.612513	1.24387e-24	7.94885e-23	UP		regulation of small GTPase mediated signal transduction (GO:0051056)	139	8.3235e-05	UP
Rassf5	1.04269	1.5612e-24	9.94131e-23	UP		negative regulation of biomineral tissue development (GO:0070168)	13	8.4544e-05	UP
Pfkfb1	-1.9247	1.70246e-24	1.08025e-22	DOWN		chondroitin sulfate catabolic process (GO:0030207)	13	9.4668e-05	UP
Sh2b2	1.8785	1.73393e-24	1.09634e-22	UP		regulation of heart contraction (GO:0008016)	92	9.5911e-05	DOWN
Itga11	2.32594	1.93374e-24	1.21839e-22	UP		bleb assembly (GO:0032060)	7	9.7947e-05	UP
Dse	1.33471	2.3385e-24	1.46827e-22	UP		regulation of defense response (GO:0031347)	62	9.9133e-05	UP
Glipr1	2.66273	2.61247e-24	1.63457e-22	UP		negative regulation of cell proliferation (GO:0008285)	338	9.9133e-05	UP
Plk5	-1.82848	2.87794e-24	1.79442e-22	DOWN		regulation of membrane protein ectodomain proteolysis (GO:0051043)	21	0.00010026	UP
Arhgap11a	1.3554	3.09042e-24	1.92023e-22	UP		regulation of nitric oxide biosynthetic process (GO:0045428)	31	0.00010431	UP
Serpina3g	2.54145	3.22664e-24	1.99796e-22	UP		aminoglycan biosynthetic process (GO:0006023)	46	0.00010748	UP
Col6a6	-1.81918	3.31441e-24	2.04525e-22	DOWN		dendritic cell differentiation (GO:0097028)	20	0.00010766	UP
P3h3	1.48091	3.57758e-24	2.20009e-22	UP		positive regulation of tyrosine phosphorylation of STAT protein (GO:0042531)	45	0.00010811	UP
Carhsp1	0.987512	3.77236e-24	2.31196e-22	UP		sulfur compound catabolic process (GO:0044273)	35	0.0001085	UP
Havcr2	2.03015	3.79393e-24	2.31726e-22	UP		plasma membrane invagination (GO:0099024)	27	0.0001085	UP
Pstpip1	1.93894	4.77979e-24	2.90952e-22	UP		negative regulation of cellular process (GO:0048523)	488	0.0001157	UP
Adamts10	1.56857	5.34451e-24	3.24228e-22	UP		regulation of leukocyte chemotaxis (GO:0002688)	23	0.0001157	UP
Layn	1.0288	5.54947e-24	3.35528e-22	UP		positive regulation of cartilage development (GO:0061036)	16	0.0001194	UP
Epas1	-0.623623	5.83759e-24	3.51764e-22	DOWN		cell morphogenesis (GO:0000902)	57	0.00012009	UP
Anxa2	1.15884	7.30501e-24	4.38716e-22	UP		positive regulation of mononuclear cell migration (GO:0071677)	17	0.00012083	UP
Aldh2	-0.875518	1.08866e-23	6.51634e-22	DOWN		O-glycan processing (GO:0016266)	58	0.00012083	UP
Nek6	0.970552	1.20976e-23	7.21717e-22	UP		positive regulation of vascular endothelial growth factor production (GO:0010575)	23	0.00012292	UP
Egr2	2.94596	1.30204e-23	7.74198e-22	UP		cell-cell junction organization (GO:0045216)	68	0.00012344	UP
Akr1b8	1.55678	1.49445e-23	8.85673e-22	UP		mitochondrial transmembrane transport (GO:1990542)	32	0.00012377	DOWN
Dglucy	-1.31613	1.63033e-23	9.63018e-22	DOWN		ephrin receptor signaling pathway (GO:0048013)	81	0.00012429	UP
Hrc	-1.19606	1.86337e-23	1.09707e-21	DOWN		acetyl-CoA metabolic process (GO:0006084)	14	0.00012446	DOWN
Hadh	-0.969613	1.87981e-23	1.10313e-21	DOWN		positive regulation of acute inflammatory response (GO:0002675)	15	0.0001257	UP
Mpeg1	2.06939	1.89596e-23	1.10898e-21	UP		response to tumor necrosis factor (GO:0034612)	80	0.00012575	UP
Pcdh9	1.51075	1.97244e-23	1.14997e-21	UP		regulation of mesenchymal stem cell differentiation (GO:2000739)	6	0.00013325	UP
Capn6	3.43424	2.07251e-23	1.2044e-21	UP		positive regulation of cell adhesion mediated by integrin (GO:0033630)	13	0.0001366	UP
Fuz	-0.875429	2.12943e-23	1.23349e-21	DOWN		regulation of monocyte chemotaxis (GO:0090025)	19	0.0001366	UP
Adi1	-0.760075	2.35717e-23	1.36102e-21	DOWN		positive regulation of Rho protein signal transduction (GO:0035025)	24	0.00013782	UP
Cd44	1.75152	2.37544e-23	1.36717e-21	UP		regulation of stress fiber assembly (GO:0051492)	59	0.00013864	UP
Pink1	-0.975238	2.66163e-23	1.52699e-21	DOWN		regulation of NF-kappaB import into nucleus (GO:0042345)	24	0.00013874	UP
Cdh11	1.58055	2.69356e-23	1.54039e-21	UP		macrophage activation (GO:0042116)	16	0.0001416	UP
Garem2	2.64764	3.73624e-23	2.12989e-21	UP		regulation of immune effector process (GO:0002697)	39	0.00014373	UP
Myc	1.24214	4.38244e-23	2.49037e-21	UP		relaxation of muscle (GO:0090075)	11	0.00014689	DOWN
Sgms2	1.51957	4.63523e-23	2.6257e-21	UP		RNA metabolic process (GO:0016070)	181	0.00014979	DOWN
Knstrn	1.93951	4.93513e-23	2.78679e-21	UP		bone development (GO:0060348)	33	0.00015087	UP
Strit1	-1.97398	5.19755e-23	2.92578e-21	DOWN		transforming growth factor beta receptor signaling pathway (GO:0007179)	75	0.00015332	UP
Runx2	1.79478	5.78133e-23	3.24423e-21	UP		negative regulation of cytokine production (GO:0001818)	105	0.00015526	UP
C4b	1.65375	5.87226e-23	3.28499e-21	UP		negative regulation of interleukin-6 secretion (GO:1900165)	6	0.00016085	UP
Kyat3	-1.00061	5.96482e-23	3.3264e-21	DOWN		negative regulation of bone remodeling (GO:0046851)	8	0.00016089	UP
Dcaf12l1	-0.974647	7.25753e-23	4.03478e-21	DOWN		regulation of interleukin-1 beta secretion (GO:0050706)	26	0.00016089	UP
Myof	1.57135	7.9147e-23	4.38655e-21	UP		regulation of blood coagulation (GO:0030193)	30	0.00016089	UP
Acad12	-0.870517	7.98082e-23	4.40959e-21	DOWN		keratinocyte differentiation (GO:0030216)	32	0.00016133	UP
Serpinb1a	1.98068	8.39995e-23	4.62693e-21	UP		negative regulation of cell motility (GO:2000146)	92	0.00016133	UP
Tyro3	1.08788	8.89772e-23	4.88613e-21	UP		regulation of phagocytosis (GO:0050764)	35	0.00016327	UP
Il1rn	3.77945	9.04096e-23	4.94832e-21	UP		regulation of primary metabolic process (GO:0080090)	133	0.00016382	DOWN
Tgfb3	1.51702	9.06609e-23	4.94832e-21	UP		mitotic cytokinesis (GO:0000281)	43	0.0001647	UP
Vgll3	1.57311	9.90414e-23	5.38935e-21	UP		positive regulation of B cell activation (GO:0050871)	41	0.0001647	UP
Nrip3	3.06876	1.04934e-22	5.69273e-21	UP		regulation of fibroblast proliferation (GO:0048145)	45	0.00016639	UP
Col6a1	1.62099	1.05361e-22	5.6987e-21	UP		ATP synthesis coupled electron transport (GO:0042773)	9	0.0001712	DOWN
Gpx3	1.25297	1.07172e-22	5.77922e-21	UP		regulation of transcription from RNA polymerase II promoter in response to hypoxia (GO:0061418)	76	0.00017262	DOWN
Phgdh	1.58404	1.09993e-22	5.91358e-21	UP		actin filament organization (GO:0007015)	118	0.00017325	UP
Cdk14	0.911756	1.18351e-22	6.34395e-21	UP		positive regulation of interleukin-1 beta production (GO:0032731)	25	0.0001754	UP
Ppl	-1.92081	1.20309e-22	6.42972e-21	DOWN		branching morphogenesis of an epithelial tube (GO:0048754)	42	0.00017825	UP
4430402I18Rik	-1.02535	1.52911e-22	8.14785e-21	DOWN		positive regulation of immune response (GO:0050778)	46	0.00017825	UP
Clec4d	3.62141	2.32868e-22	1.23717e-20	UP		protein homotetramerization (GO:0051289)	52	0.00018056	DOWN
Yipf7	-0.926641	2.38097e-22	1.26121e-20	DOWN		regulation of adiponectin secretion (GO:0070163)	6	0.00019094	UP
C1qtnf5	1.92203	2.5894e-22	1.36758e-20	UP		regulation of humoral immune response (GO:0002920)	39	0.00019761	UP
Ppic	1.45296	2.66255e-22	1.40209e-20	UP		regulation of pathway-restricted SMAD protein phosphorylation (GO:0060393)	58	0.00019761	UP
Prkar1a	0.657473	2.88063e-22	1.5125e-20	UP		collagen metabolic process (GO:0032963)	12	0.00020007	UP
Cd53	1.3011	2.97133e-22	1.55558e-20	UP		regulation of attachment of spindle microtubules to kinetochore (GO:0051988)	10	0.00020231	UP
Plcxd2	2.33584	3.19206e-22	1.66627e-20	UP		lipopolysaccharide-mediated signaling pathway (GO:0031663)	16	0.0002053	UP
Clec4n	2.05651	3.91861e-22	2.03961e-20	UP		positive regulation of endocytosis (GO:0045807)	58	0.00021052	UP
Plac8	3.03646	3.99684e-22	2.07431e-20	UP		chondrocyte development (GO:0002063)	6	0.00021221	UP
Gstk1	-1.28463	4.02388e-22	2.08233e-20	DOWN		response to interleukin-1 (GO:0070555)	61	0.00021256	UP
Upp1	1.19962	4.06121e-22	2.09561e-20	UP		regulation of tyrosine phosphorylation of STAT protein (GO:0042509)	53	0.00021401	UP
Lrrc39	-0.656685	4.15786e-22	2.13933e-20	DOWN		axonogenesis (GO:0007409)	219	0.00022349	UP
Acss1	-0.952096	4.62136e-22	2.37102e-20	DOWN		negative regulation of cell communication (GO:0010648)	77	0.00022847	UP
Fgfr1	0.920691	5.32454e-22	2.72401e-20	UP		positive regulation of vasculature development (GO:1904018)	99	0.0002458	UP
Tgfb2	1.73317	6.10989e-22	3.11691e-20	UP		positive regulation of NF-kappaB import into nucleus (GO:0042346)	15	0.00025203	UP
Pxmp2	-1.01693	6.74893e-22	3.42776e-20	DOWN		positive regulation of interleukin-1 beta secretion (GO:0050718)	21	0.00025716	UP
Pdp2	-1.19825	6.75741e-22	3.42776e-20	DOWN		acyl-CoA biosynthetic process (GO:0071616)	10	0.00026558	DOWN
Ech1	-1.21863	8.15501e-22	4.12506e-20	DOWN		regulation of cardiac conduction (GO:1903779)	66	0.0002691	DOWN
Ace	1.07859	8.58367e-22	4.32969e-20	UP		regulation of transforming growth factor beta receptor signaling pathway (GO:0017015)	75	0.00027391	UP
Gm49339	1.69654	8.76671e-22	4.40963e-20	UP		positive regulation of response to external stimulus (GO:0032103)	76	0.00028192	UP
Mfap2	2.13265	8.81347e-22	4.42077e-20	UP		positive regulation of protein kinase B signaling (GO:0051897)	117	0.00028314	UP
Pak1	1.52449	8.8797e-22	4.44158e-20	UP		dorsal/ventral pattern formation (GO:0009953)	18	0.00028635	UP
P2ry1	-1.19828	9.41708e-22	4.69729e-20	DOWN		negative regulation of epithelial cell proliferation (GO:0050680)	64	0.00028635	UP
Ankrd63	-1.6167	9.7698e-22	4.85973e-20	DOWN		cytoskeleton-dependent cytokinesis (GO:0061640)	52	0.00028635	UP
Slc7a11	4.08955	9.87818e-22	4.90007e-20	UP		negative regulation of cellular response to growth factor stimulus (GO:0090288)	52	0.00029082	UP
Suclg2	-0.739509	1.02042e-21	5.04784e-20	DOWN		axon development (GO:0061564)	93	0.00029267	UP
Adamts12	2.14199	1.14534e-21	5.65022e-20	UP		cell morphogenesis involved in differentiation (GO:0000904)	54	0.00029962	UP
Marcksl1	1.49201	1.18421e-21	5.826e-20	UP		response to lipid (GO:0033993)	127	0.00030484	UP
Bicc1	0.899518	1.19332e-21	5.85475e-20	UP		positive regulation of tumor necrosis factor production (GO:0032760)	45	0.00030484	UP
Dele1	-0.772306	1.34582e-21	6.58498e-20	DOWN		negative regulation of transmembrane receptor protein serine/threonine kinase signaling pathway (GO:0090101)	71	0.00030484	UP
Slc1a4	1.57471	1.37721e-21	6.72027e-20	UP		adrenal gland development (GO:0030325)	10	0.00030497	UP
Vat1	1.09358	1.47953e-21	7.19996e-20	UP		regulation of collagen biosynthetic process (GO:0032965)	17	0.00030594	UP
Slc6a7	3.87037	1.60503e-21	7.78961e-20	UP		aminoglycan metabolic process (GO:0006022)	28	0.00032865	UP
Masp1	1.19563	1.69714e-21	8.21445e-20	UP		negative regulation of peptidase activity (GO:0010466)	45	0.00033408	UP
Sfxn3	1.02859	1.7151e-21	8.27903e-20	UP		positive regulation of mitophagy in response to mitochondrial depolarization (GO:0098779)	6	0.0003351	DOWN
Tcaim	-0.897461	1.80921e-21	8.70992e-20	DOWN		positive regulation of tumor necrosis factor superfamily cytokine production (GO:1903557)	31	0.00034475	UP
Ivd	-1.04776	1.85083e-21	8.88648e-20	DOWN		peptidyl-tyrosine modification (GO:0018212)	50	0.00035682	UP
Cenpi	2.79188	1.93093e-21	9.2463e-20	UP		regulation of chemokine production (GO:0032642)	17	0.00038329	UP
Lhfpl2	2.20379	1.94423e-21	9.28068e-20	UP		positive regulation of cellular extravasation (GO:0002693)	6	0.00038354	UP
Pfkm	-0.685944	1.94844e-21	9.28068e-20	DOWN		negative regulation of reproductive process (GO:2000242)	9	0.00039391	UP
Medag	1.23291	2.03109e-21	9.63101e-20	UP		regulation of platelet activation (GO:0010543)	19	0.00040225	UP
Nppb	2.12354	2.03272e-21	9.63101e-20	UP		defense response to bacterium (GO:0042742)	95	0.00040225	UP
Isoc1	-0.628903	2.12708e-21	1.00516e-19	DOWN		respiratory chain complex IV assembly (GO:0008535)	24	0.00041991	DOWN
Atp1a2	-0.778932	2.1927e-21	1.03344e-19	DOWN		positive regulation of cytokine secretion (GO:0050715)	61	0.00042003	UP
Mylk2	3.06243	2.48171e-21	1.1666e-19	UP		regulation of cytokine production (GO:0001817)	89	0.00043202	UP
Ptprf	1.59355	2.65e-21	1.24246e-19	UP		positive regulation of cell adhesion (GO:0045785)	59	0.00043335	UP
Cercam	1.88347	2.70028e-21	1.26273e-19	UP		glomerular filtration (GO:0003094)	7	0.00043778	UP
Trim59	1.83018	2.89768e-21	1.35152e-19	UP		regulation of actin cytoskeleton organization (GO:0032956)	73	0.00045107	UP
Cers6	1.025	2.9791e-21	1.3859e-19	UP		negative regulation of tumor necrosis factor production (GO:0032720)	32	0.00045332	UP
Adamts4	2.52456	3.35284e-21	1.55573e-19	UP		regulation of smooth muscle cell migration (GO:0014910)	18	0.00045615	UP
Pdk2	-0.868129	3.65922e-21	1.69352e-19	DOWN		negative regulation of ATPase activity (GO:0032780)	12	0.00046797	DOWN
Isoc2a	-1.02518	3.67175e-21	1.69495e-19	DOWN		negative regulation of tumor necrosis factor superfamily cytokine production (GO:1903556)	30	0.00047266	UP
Adamts16	6.34508	4.18969e-21	1.92909e-19	UP		collagen biosynthetic process (GO:0032964)	6	0.00048938	UP
Asb14	-1.03001	4.3363e-21	1.99148e-19	DOWN		regulation of neuron projection development (GO:0010975)	117	0.00049314	UP
Psrc1	2.48339	4.73819e-21	2.1705e-19	UP		positive regulation of bone mineralization (GO:0030501)	30	0.00049314	UP
Trim46	1.95231	4.93254e-21	2.25297e-19	UP		relaxation of cardiac muscle (GO:0055119)	11	0.00051053	DOWN
Col15a1	1.7334	4.9433e-21	2.25297e-19	UP		positive regulation of stress fiber assembly (GO:0051496)	36	0.00051363	UP
Tgif1	1.7589	5.03411e-21	2.28855e-19	UP		regulation of focal adhesion assembly (GO:0051893)	44	0.00051363	UP
Ldhb	-0.900507	5.15648e-21	2.33826e-19	DOWN		cellular response to lipid (GO:0071396)	160	0.00051523	UP
Casp12	1.2447	5.5953e-21	2.53085e-19	UP		granulocyte migration (GO:0097530)	5	0.00052774	UP
Azin2	2.31126	6.2002e-21	2.79741e-19	UP		regulation of biosynthetic process (GO:0009889)	6	0.00053698	DOWN
Itgb3	1.35524	6.22098e-21	2.79975e-19	UP		BMP signaling pathway (GO:0030509)	77	0.00053908	UP
Kcnma1	2.36741	6.2461e-21	2.80403e-19	UP		regulation of cardiac muscle contraction by regulation of the release of sequestered calcium ion (GO:0010881)	16	0.0005395	DOWN
Bdkrb2	2.28124	6.3459e-21	2.84173e-19	UP		cell junction maintenance (GO:0034331)	8	0.00053992	UP
Uchl1	1.58659	6.60971e-21	2.9525e-19	UP		regulation of phagocytosis, engulfment (GO:0060099)	6	0.00054331	UP
Acadm	-0.902828	7.23663e-21	3.22452e-19	DOWN		regulation of cellular response to growth factor stimulus (GO:0090287)	17	0.00054359	UP
Rtn2	-1.05636	7.72263e-21	3.43256e-19	DOWN		negative regulation of signaling (GO:0023057)	82	0.00054359	UP
Mccc2	-0.875242	9.64654e-21	4.27711e-19	DOWN		regulation of chondrocyte differentiation (GO:0032330)	22	0.00054359	UP
Hadha	-0.936489	9.80235e-21	4.33549e-19	DOWN		sensory organ morphogenesis (GO:0090596)	7	0.00054662	UP
Timp2	1.00614	9.8862e-21	4.36183e-19	UP		regulation of I-kappaB kinase/NF-kappaB signaling (GO:0043122)	183	0.00054662	UP
Rpl3l	-1.43656	1.08141e-20	4.75952e-19	DOWN		xenobiotic catabolic process (GO:0042178)	6	0.00055016	DOWN
Hopx	-0.982424	1.08722e-20	4.77338e-19	DOWN		regulation of osteoblast proliferation (GO:0033688)	15	0.00055459	UP
Col6a2	1.66793	1.11725e-20	4.89328e-19	UP		fructose metabolic process (GO:0006000)	6	0.000573	DOWN
Car13	1.73392	1.14882e-20	5.01931e-19	UP		regulation of extrinsic apoptotic signaling pathway (GO:2001236)	55	0.00058443	UP
Pfkp	1.14377	1.1558e-20	5.03755e-19	UP		toll-like receptor signaling pathway (GO:0002224)	79	0.00058858	UP
Pcp4l1	-0.782497	1.17732e-20	5.11894e-19	DOWN		positive regulation of blood coagulation (GO:0030194)	19	0.00058858	UP
Col7a1	2.15548	1.34284e-20	5.82449e-19	UP		regulation of antigen receptor-mediated signaling pathway (GO:0050854)	12	0.00059557	UP
Soat1	1.23498	1.43701e-20	6.21793e-19	UP		cardiolipin metabolic process (GO:0032048)	13	0.00060639	DOWN
Etfa	-0.830036	1.44656e-20	6.24422e-19	DOWN		negative regulation of peptidyl-tyrosine phosphorylation (GO:0050732)	27	0.00061381	UP
Ctf1	-0.861339	1.46007e-20	6.28741e-19	DOWN		positive regulation of interleukin-8 secretion (GO:2000484)	11	0.00061623	UP
Dclk3	2.64503	1.49313e-20	6.41439e-19	UP		positive regulation of osteoblast differentiation (GO:0045669)	32	0.00062749	UP
Pln	-0.767327	2.05905e-20	8.82444e-19	DOWN		positive regulation of pathway-restricted SMAD protein phosphorylation (GO:0010862)	47	0.00064915	UP
Slc5a6	-0.673124	2.07182e-20	8.85803e-19	DOWN		positive regulation of neuron differentiation (GO:0045666)	95	0.00066112	UP
Pcolce	1.25892	2.13347e-20	9.09992e-19	UP		positive regulation of cell-cell adhesion (GO:0022409)	30	0.00067184	UP
Itgb8	1.44686	2.21079e-20	9.40738e-19	UP		response to amyloid-beta (GO:1904645)	25	0.00067245	UP
Lrrc14b	-0.972837	2.41504e-20	1.02522e-18	DOWN		mitochondrial electron transport, ubiquinol to cytochrome c (GO:0006122)	12	0.00071606	DOWN
Pcp4	-2.142	2.57178e-20	1.08919e-18	DOWN		negative regulation of interleukin-8 production (GO:0032717)	17	0.00073353	UP
Itm2a	1.28264	2.83406e-20	1.19744e-18	UP		odontogenesis (GO:0042476)	36	0.0007478	UP
Add2	2.85869	3.05993e-20	1.28984e-18	UP		B cell activation (GO:0042113)	59	0.00074985	UP
Loxl4	1.64655	3.12021e-20	1.31217e-18	UP		hyaluronan biosynthetic process (GO:0030213)	7	0.0007588	UP
Gchfr	-1.26161	3.17283e-20	1.33118e-18	DOWN		RNA processing (GO:0006396)	186	0.0007668	DOWN
Gnmt	-1.68213	3.53579e-20	1.48001e-18	DOWN		retrograde transport, vesicle recycling within Golgi (GO:0000301)	5	0.00078008	DOWN
Carnmt1	-0.632588	3.70155e-20	1.54578e-18	DOWN		cofactor biosynthetic process (GO:0051188)	30	0.00080543	DOWN
Hsd17b10	-0.701092	3.91518e-20	1.63121e-18	DOWN		regulation of protein activation cascade (GO:2000257)	35	0.0008142	UP
Gng8	3.71667	4.00564e-20	1.66503e-18	UP		positive regulation of lymphocyte differentiation (GO:0045621)	15	0.00083812	UP
Plk1	1.85002	4.13099e-20	1.71317e-18	UP		protein O-linked glycosylation (GO:0006493)	105	0.00083812	UP
Slc2a4	-0.857079	4.55502e-20	1.88467e-18	DOWN		regulation of actin filament depolymerization (GO:0030834)	11	0.00083812	UP
Rab27b	1.29891	5.19791e-20	2.14572e-18	UP		T cell differentiation (GO:0030217)	37	0.00084322	UP
Snai1	1.43093	5.29627e-20	2.18131e-18	UP		succinate metabolic process (GO:0006105)	8	0.00086434	DOWN
Mipep	-0.754913	5.95735e-20	2.44797e-18	DOWN		regulation of smooth muscle cell proliferation (GO:0048660)	43	0.00086789	UP
Prc1	1.83558	6.02072e-20	2.46836e-18	UP		atrioventricular valve development (GO:0003171)	9	0.00087883	UP
Kdelr3	1.68102	6.53429e-20	2.67281e-18	UP		medium-chain fatty acid metabolic process (GO:0051791)	7	0.00090247	DOWN
Col3a1	3.13733	6.94685e-20	2.8351e-18	UP		artery morphogenesis (GO:0048844)	30	0.00090874	UP
Glipr2	1.10655	7.36759e-20	3e-18	UP		protein tetramerization (GO:0051262)	83	0.00091346	DOWN
Aldh6a1	-0.96664	7.51592e-20	3.05347e-18	DOWN		cellular response to amyloid-beta (GO:1904646)	23	0.00091545	UP
Doc2g	-0.740749	7.66523e-20	3.1071e-18	DOWN		positive regulation of smoothened signaling pathway (GO:0045880)	12	0.00093133	UP
Rdm1	-0.853448	7.89129e-20	3.19153e-18	DOWN		negative regulation of programmed cell death (GO:0043069)	385	0.00095103	UP
Zbtb7c	1.17945	7.92276e-20	3.19705e-18	UP		regulation of actin filament-based process (GO:0032970)	60	0.0009568	UP
As3mt	-0.822162	7.96975e-20	3.20881e-18	DOWN		positive regulation of defense response (GO:0031349)	60	0.00099012	UP
Omd	1.7043	8.88958e-20	3.57114e-18	UP		lymphocyte differentiation (GO:0030098)	61	0.001007	UP
Nqo2	-0.697631	8.97773e-20	3.59851e-18	DOWN		peptidyl-tyrosine phosphorylation (GO:0018108)	78	0.0010116	UP
F2r	0.983099	9.96486e-20	3.98528e-18	UP		regulation of neuron migration (GO:2001222)	17	0.0010169	UP
Trem2	2.45542	1.01026e-19	4.03137e-18	UP		negative regulation of transforming growth factor beta receptor signaling pathway (GO:0030512)	52	0.0010271	UP
Zfyve21	-0.681592	1.068e-19	4.25234e-18	DOWN		mature B cell differentiation involved in immune response (GO:0002313)	9	0.0010426	UP
Itk	-1.31855	1.21713e-19	4.8354e-18	DOWN		chordate embryonic development (GO:0043009)	52	0.0010456	UP
Gpm6b	0.790816	1.22061e-19	4.8385e-18	UP		regulation of Rho protein signal transduction (GO:0035023)	56	0.0010567	UP
Klhdc1	-0.921832	1.2265e-19	4.85115e-18	DOWN		positive regulation of cell migration involved in sprouting angiogenesis (GO:0090050)	16	0.0010567	UP
Gcdh	-0.92277	1.25787e-19	4.96429e-18	DOWN		positive regulation of transmembrane receptor protein serine/threonine kinase signaling pathway (GO:0090100)	80	0.0010567	UP
Matn2	0.905622	1.28441e-19	5.05793e-18	UP		regulation of hemopoiesis (GO:1903706)	11	0.0010576	UP
Scarf2	1.31105	1.37127e-19	5.38816e-18	UP		positive regulation of gene expression (GO:0010628)	733	0.001059	UP
Tspo	1.16697	1.38464e-19	5.42363e-18	UP		negative regulation of leukocyte activation (GO:0002695)	11	0.001059	UP
Mpv17	-0.516208	1.38634e-19	5.42363e-18	DOWN		regulation of response to external stimulus (GO:0032101)	92	0.001071	UP
Sdhc	-0.715791	1.41306e-19	5.51293e-18	DOWN		positive regulation of kinase activity (GO:0033674)	106	0.001094	UP
Anln	1.90893	1.4153e-19	5.51293e-18	UP		endocardial cushion morphogenesis (GO:0003203)	15	0.001094	UP
Hadhb	-0.876397	1.54825e-19	6.01773e-18	DOWN		cellular response to ketone (GO:1901655)	28	0.001094	UP
Ube2c	1.80714	1.66328e-19	6.45086e-18	UP		regulation of wound healing (GO:0061041)	32	0.001094	UP
Cavin3	1.0212	1.69491e-19	6.55938e-18	UP		nucleoside metabolic process (GO:0009116)	9	0.0011209	DOWN
Slc25a12	-0.699031	1.83726e-19	7.09499e-18	DOWN		neutrophil activation (GO:0042119)	10	0.0011215	UP
Tenm3	1.45859	2.18275e-19	8.41109e-18	UP		positive regulation of collagen biosynthetic process (GO:0032967)	15	0.0011215	UP
Rcn3	1.42464	2.2622e-19	8.69856e-18	UP		positive regulation of collagen metabolic process (GO:0010714)	15	0.0011215	UP
Pygm	-0.731823	2.28409e-19	8.76399e-18	DOWN		superoxide anion generation (GO:0042554)	8	0.0011321	UP
Pla2g5	-1.13131	2.42873e-19	9.29908e-18	DOWN		epidermal cell differentiation (GO:0009913)	40	0.0011543	UP
Prss35	2.35693	2.65584e-19	1.0147e-17	UP		eye development (GO:0001654)	42	0.0011543	UP
Itgav	0.640977	2.70272e-19	1.03042e-17	UP		regulation of mitochondrial membrane permeability involved in apoptotic process (GO:1902108)	6	0.0011813	DOWN
Rab31	1.21366	2.73742e-19	1.04144e-17	UP		gland development (GO:0048732)	70	0.0011923	UP
Aldh9a1	-0.690927	2.78148e-19	1.05596e-17	DOWN		regulation of leukocyte migration (GO:0002685)	13	0.001197	UP
Vim	1.33838	2.82701e-19	1.07098e-17	UP		epidermis development (GO:0008544)	60	0.0012009	UP
Pdgfc	1.39889	3.21477e-19	1.21532e-17	UP		negative regulation of cell adhesion (GO:0007162)	64	0.0012407	UP
Acat1	-0.727753	3.48078e-19	1.31312e-17	DOWN		regulation of GTPase activity (GO:0043087)	172	0.0012423	UP
Pqlc3	1.77027	3.65517e-19	1.37602e-17	UP		aspartate family amino acid metabolic process (GO:0009066)	10	0.0012458	DOWN
Srgap3	1.89548	4.40454e-19	1.65465e-17	UP		protein modification by small protein conjugation (GO:0032446)	376	0.0012489	DOWN
Met	1.76755	4.62986e-19	1.73567e-17	UP		positive regulation of B cell differentiation (GO:0045579)	7	0.0012582	UP
Igsf10	1.92291	5.13207e-19	1.91993e-17	UP		hippo signaling (GO:0035329)	30	0.0012836	UP
Sod2	-0.777611	5.19041e-19	1.93772e-17	DOWN		negative regulation of inflammatory response (GO:0050728)	65	0.0012956	UP
Ptprc	1.29018	5.3407e-19	1.98969e-17	UP		maintenance of protein location in extracellular region (GO:0071694)	5	0.0012993	UP
Pdk3	1.13503	5.6683e-19	2.10737e-17	UP		heart contraction (GO:0060047)	43	0.0013381	DOWN
Creg1	-0.838002	5.72453e-19	2.12387e-17	DOWN		transcription from mitochondrial promoter (GO:0006390)	11	0.0013664	DOWN
Hif1a	0.76236	6.12467e-19	2.26764e-17	UP		synapse assembly (GO:0007416)	59	0.0013812	UP
Htra4	1.59048	6.49905e-19	2.40131e-17	UP		mesenchyme development (GO:0060485)	16	0.0013831	UP
Aqp2	3.20374	7.65055e-19	2.82096e-17	UP		leukocyte differentiation (GO:0002521)	12	0.0013831	UP
Sec16b	1.40283	7.97265e-19	2.93371e-17	UP		cellular response to peptide (GO:1901653)	40	0.0013831	UP
Lbp	1.13465	7.99284e-19	2.93512e-17	UP		myeloid leukocyte mediated immunity (GO:0002444)	8	0.0013831	UP
Echs1	-0.68115	8.09983e-19	2.9631e-17	DOWN		protein phosphorylation (GO:0006468)	451	0.0013968	UP
Slc7a2	1.61493	8.10203e-19	2.9631e-17	UP		renal filtration (GO:0097205)	8	0.0014277	UP
Ahnak2	1.88354	8.21635e-19	2.9988e-17	UP		B cell receptor signaling pathway (GO:0050853)	28	0.0014277	UP
Plscr5	-1.60264	8.72306e-19	3.17728e-17	DOWN		long-chain fatty acid transport (GO:0015909)	24	0.001456	DOWN
Zfp697	1.08142	8.805e-19	3.20063e-17	UP		regulation of ATPase activity (GO:0043462)	40	0.001456	DOWN
Coro1a	1.08301	8.8338e-19	3.20462e-17	UP		retinoic acid metabolic process (GO:0042573)	10	0.0014794	UP
Prxl2a	-0.750358	1.05198e-18	3.80856e-17	DOWN		positive regulation of alpha-beta T cell proliferation (GO:0046641)	12	0.0014794	UP
Acy3	-0.833391	1.06897e-18	3.86228e-17	DOWN		regulation of innate immune response (GO:0045088)	55	0.0014968	UP
Tmem200a	3.56011	1.15687e-18	4.17146e-17	UP		positive regulation of chondrocyte differentiation (GO:0032332)	10	0.0015131	UP
Ipo13	-0.741423	1.19581e-18	4.30324e-17	DOWN		regulation of cortisol biosynthetic process (GO:2000064)	6	0.0015146	UP
Tnni3	-0.909125	1.24878e-18	4.48487e-17	DOWN		cobalamin metabolic process (GO:0009235)	16	0.0015824	DOWN
Gpr155	-0.691694	1.30097e-18	4.66296e-17	DOWN		tetrapyrrole metabolic process (GO:0033013)	16	0.0015824	DOWN
Mgam	1.94593	1.35813e-18	4.85814e-17	UP		organic cyclic compound catabolic process (GO:1901361)	8	0.0016041	DOWN
Socs3	1.25143	1.41856e-18	5.06422e-17	UP		hyaluronan catabolic process (GO:0030214)	15	0.0016388	UP
Kif1a	1.60882	1.42223e-18	5.06725e-17	UP		canonical Wnt signaling pathway (GO:0060070)	72	0.0016388	UP
Idh2	-0.72902	1.64096e-18	5.835e-17	DOWN		positive regulation of fever generation (GO:0031622)	6	0.0016449	UP
Dut	-0.671029	1.68815e-18	5.99093e-17	DOWN		embryonic eye morphogenesis (GO:0048048)	11	0.0016644	UP
Pcca	-0.783945	1.77661e-18	6.28891e-17	DOWN		regulation of interferon-gamma production (GO:0032649)	39	0.0016644	UP
Sv2c	-1.74836	1.77912e-18	6.28891e-17	DOWN		positive regulation of supramolecular fiber organization (GO:1902905)	81	0.0016731	UP
Cyp2b10	-2.46705	1.78824e-18	6.30872e-17	DOWN		regulation of lymphocyte apoptotic process (GO:0070228)	6	0.0016731	UP
Calhm5	1.5157	1.82676e-18	6.432e-17	UP		positive regulation of interleukin-1 secretion (GO:0050716)	24	0.0016743	UP
Fbn2	1.91045	2.03587e-18	7.15422e-17	UP		coenzyme A biosynthetic process (GO:0015937)	7	0.0016775	DOWN
Pccb	-0.630323	2.10128e-18	7.36968e-17	DOWN		ribonucleoside bisphosphate biosynthetic process (GO:0034030)	7	0.0016775	DOWN
Zbtb18	-0.480854	2.1188e-18	7.41662e-17	DOWN		purine nucleoside bisphosphate biosynthetic process (GO:0034033)	7	0.0016775	DOWN
Serpina3i	3.01095	2.28506e-18	7.98304e-17	UP		mitochondrial tRNA modification (GO:0070900)	7	0.0016775	DOWN
Mmut	-0.780884	2.81976e-18	9.83193e-17	DOWN		potassium ion import across plasma membrane (GO:1990573)	9	0.0016775	DOWN
Cacng6	-2.14923	3.09742e-18	1.07791e-16	DOWN		regulation of mitochondrial translation (GO:0070129)	15	0.0016909	DOWN
Ckap2l	2.28583	3.25054e-18	1.12901e-16	UP		positive regulation of interferon-gamma production (GO:0032729)	38	0.0017536	UP
Prpf19	-0.57191	3.41141e-18	1.1826e-16	DOWN		pathway-restricted SMAD protein phosphorylation (GO:0060389)	13	0.0017617	UP
Bid	1.71616	3.50668e-18	1.21328e-16	UP		cell-cell junction maintenance (GO:0045217)	10	0.0017801	UP
Il1r1	0.814457	3.58035e-18	1.23639e-16	UP		macromolecule biosynthetic process (GO:0009059)	18	0.001787	UP
Cd52	1.82142	3.61834e-18	1.24711e-16	UP		positive regulation of STAT cascade (GO:1904894)	13	0.0017917	UP
Cyp1b1	1.5517	3.63426e-18	1.2502e-16	UP		regulation of osteoblast differentiation (GO:0045667)	66	0.0017947	UP
Mdfi	1.997	3.6519e-18	1.25387e-16	UP		cell chemotaxis (GO:0060326)	48	0.0017947	UP
Hsdl2	-0.74165	3.72333e-18	1.27595e-16	DOWN		regulation of ossification (GO:0030278)	37	0.0017977	UP
Mid1ip1	-0.976264	3.79421e-18	1.29776e-16	DOWN		regulation of endocytosis (GO:0030100)	68	0.0017977	UP
Mmab	-0.837478	3.82625e-18	1.30623e-16	DOWN		generation of neurons (GO:0048699)	126	0.0017977	UP
Apbb1	-0.894302	4.28151e-18	1.45888e-16	DOWN		cellular response to mechanical stimulus (GO:0071260)	46	0.0018563	UP
Cfh	1.15882	4.7926e-18	1.62994e-16	UP		negative regulation of NF-kappaB transcription factor activity (GO:0032088)	70	0.0018606	UP
Sox9	2.60822	4.92649e-18	1.67231e-16	UP		positive regulation of bone resorption (GO:0045780)	10	0.0018851	UP
AA467197	2.59842	4.98862e-18	1.6902e-16	UP		positive regulation of bone remodeling (GO:0046852)	10	0.0018851	UP
Cacna1s	-1.35512	5.17065e-18	1.74857e-16	DOWN		regulation of cytoskeleton organization (GO:0051493)	92	0.0018851	UP
Mefv	4.04412	5.47267e-18	1.84723e-16	UP		iron-sulfur cluster assembly (GO:0016226)	17	0.0019176	DOWN
Ptgs2	2.11598	5.62507e-18	1.89511e-16	UP		mesoderm formation (GO:0001707)	20	0.0019611	UP
Tmem254b	1.33358	5.69699e-18	1.91575e-16	UP		mitochondrial DNA metabolic process (GO:0032042)	7	0.0019706	DOWN
Dnaaf3	-1.1613	5.92525e-18	1.98878e-16	DOWN		positive regulation of membrane protein ectodomain proteolysis (GO:0051044)	14	0.0020073	UP
Rnf149	0.903967	6.25942e-18	2.09702e-16	UP		eosinophil migration (GO:0072677)	14	0.0021105	UP
Spn	1.6631	6.45181e-18	2.15745e-16	UP		eosinophil chemotaxis (GO:0048245)	14	0.0021105	UP
L2hgdh	-0.835433	6.73201e-18	2.24696e-16	DOWN		regulation of cardiac muscle cell contraction (GO:0086004)	26	0.0021127	DOWN
Slc2a12	-0.875181	6.94222e-18	2.30971e-16	DOWN		positive regulation of cytosolic calcium ion concentration (GO:0007204)	118	0.0021676	UP
Inpp5d	0.756545	6.94572e-18	2.30971e-16	UP		mitochondrial RNA processing (GO:0000963)	5	0.0021703	DOWN
Ckmt1	2.64538	7.37247e-18	2.44678e-16	UP		ubiquitin-dependent protein catabolic process (GO:0006511)	331	0.0021857	DOWN
Pmepa1	1.54413	7.38517e-18	2.44678e-16	UP		regulation of aldosterone biosynthetic process (GO:0032347)	6	0.0022204	UP
Robo1	1.1306	7.44331e-18	2.4615e-16	UP		coenzyme A metabolic process (GO:0015936)	10	0.0022568	DOWN
Ccdc136	1.34707	7.5301e-18	2.48562e-16	UP		peptidyl-tyrosine autophosphorylation (GO:0038083)	45	0.0023498	UP
Ptk7	1.14503	7.67231e-18	2.52792e-16	UP		ribosome biogenesis (GO:0042254)	218	0.0024387	DOWN
Cpt1c	1.3991	7.81457e-18	2.57008e-16	UP		protein polyubiquitination (GO:0000209)	268	0.0024387	DOWN
Tmem176a	1.10429	8.0532e-18	2.64372e-16	UP		regulation of cell-matrix adhesion (GO:0001952)	51	0.0024504	UP
Phkg1	-1.38252	9.10069e-18	2.98214e-16	DOWN		sister chromatid segregation (GO:0000819)	30	0.0024873	UP
Gabra3	1.7634	9.48743e-18	3.1032e-16	UP		positive regulation of sequence-specific DNA binding transcription factor activity (GO:0051091)	205	0.0025395	UP
Actr3b	-0.986442	9.64643e-18	3.14947e-16	DOWN		acute-phase response (GO:0006953)	12	0.0025557	UP
Efcab2	-0.815556	9.69329e-18	3.15903e-16	DOWN		modulation by host of viral process (GO:0044788)	7	0.002556	UP
Oplah	-0.782588	1.01921e-17	3.31559e-16	DOWN		second-messenger-mediated signaling (GO:0019932)	56	0.0025579	UP
Aldh4a1	-0.95086	1.06387e-17	3.45461e-16	DOWN		positive regulation of T-helper cell differentiation (GO:0045624)	11	0.0026042	UP
Rrm2	1.8115	1.11237e-17	3.60555e-16	UP		positive regulation of stem cell differentiation (GO:2000738)	12	0.0026048	UP
Rcan1	1.41354	1.16835e-17	3.78019e-16	UP		regulation of epithelial to mesenchymal transition involved in endocardial cushion formation (GO:1905005)	6	0.0026146	UP
Acaa2	-1.09233	1.17902e-17	3.80786e-16	DOWN		epiboly involved in wound healing (GO:0090505)	13	0.0026224	UP
Capza1	0.625285	1.18427e-17	3.813e-16	UP		fructose 1,6-bisphosphate metabolic process (GO:0030388)	7	0.0026846	DOWN
Mxra7	1.11033	1.18486e-17	3.813e-16	UP		cellular response to interferon-gamma (GO:0071346)	78	0.0027087	UP
Fam167b	2.29518	1.20576e-17	3.87333e-16	UP		positive regulation of protein serine/threonine kinase activity (GO:0071902)	107	0.0027431	UP
Pycr1	1.27009	1.30362e-17	4.17827e-16	UP		basement membrane organization (GO:0071711)	8	0.0027431	UP
Fam174b	-0.781553	1.30535e-17	4.17827e-16	DOWN		negative regulation of T cell proliferation (GO:0042130)	21	0.0027536	UP
Clec4e	4.72858	1.31576e-17	4.20412e-16	UP		positive regulation of monocyte chemotaxis (GO:0090026)	15	0.0027681	UP
Hint3	-0.648032	1.42529e-17	4.546e-16	DOWN		positive regulation of biomineral tissue development (GO:0070169)	32	0.0028057	UP
Dhrs7c	-0.94353	1.50256e-17	4.78394e-16	DOWN		regulation of transmembrane receptor protein serine/threonine kinase signaling pathway (GO:0090092)	27	0.0028098	UP
Parp1	-0.486925	1.52079e-17	4.83341e-16	DOWN		cGMP metabolic process (GO:0046068)	25	0.0028137	UP
Ubxn10	-1.44159	1.54184e-17	4.89167e-16	DOWN		neuron differentiation (GO:0030182)	134	0.0028517	UP
Inhbb	1.57763	1.56109e-17	4.944e-16	UP		regulation of cartilage development (GO:0061035)	15	0.0029175	UP
Acsl1	-0.746321	1.59476e-17	5.04175e-16	DOWN		regulation of nitric-oxide synthase activity (GO:0050999)	34	0.0029179	UP
Gjb5	3.80305	1.6186e-17	5.10811e-16	UP		embryonic organ development (GO:0048568)	48	0.0029224	UP
Car14	-0.868139	1.64868e-17	5.19391e-16	DOWN		positive regulation of DNA replication (GO:0045740)	31	0.0029224	UP
Cmss1	-1.07029	1.66505e-17	5.2363e-16	DOWN		peptide cross-linking (GO:0018149)	22	0.0029224	UP
Cd9	0.945276	1.73346e-17	5.44191e-16	UP		regulation of endothelial cell proliferation (GO:0001936)	78	0.0029264	UP
Rbfox1	-1.41665	1.73752e-17	5.44513e-16	DOWN		carbohydrate catabolic process (GO:0016052)	31	0.003142	DOWN
Col6a3	1.59167	1.74431e-17	5.45688e-16	UP		aspartate family amino acid catabolic process (GO:0009068)	19	0.0031452	DOWN
Pi15	1.10992	1.80471e-17	5.63603e-16	UP		nucleotide-excision repair, DNA damage recognition (GO:0000715)	23	0.0031452	DOWN
Msn	0.693573	1.9037e-17	5.93486e-16	UP		regulation of epidermal cell differentiation (GO:0045604)	18	0.0031679	UP
Gal3st3	-1.30964	1.91803e-17	5.95988e-16	DOWN		nervous system development (GO:0007399)	426	0.0031836	UP
Apobr	1.37195	1.92039e-17	5.95988e-16	UP		positive regulation of lymphocyte activation (GO:0051251)	24	0.0032346	UP
Ttc38	-0.763752	1.92169e-17	5.95988e-16	DOWN		regulation of toll-like receptor 4 signaling pathway (GO:0034143)	15	0.0032472	UP
Emilin1	1.40692	1.99102e-17	6.16427e-16	UP		regulation of complement activation (GO:0030449)	36	0.0032544	UP
Lypd1	2.15544	2.0319e-17	6.28001e-16	UP		actin cytoskeleton reorganization (GO:0031532)	61	0.0033073	UP
Dock2	0.878385	2.14318e-17	6.61256e-16	UP		positive regulation of transcription from RNA polymerase II promoter (GO:0045944)	778	0.0033091	UP
Anxa11	-0.533965	2.44574e-17	7.53312e-16	DOWN		positive regulation of protein import into nucleus (GO:0042307)	53	0.0033091	UP
Ccr1	1.66678	2.73251e-17	8.40201e-16	UP		negative regulation of glycolytic process (GO:0045820)	6	0.0033265	DOWN
Igfbp6	1.28253	2.73805e-17	8.40464e-16	UP		negative regulation of coenzyme metabolic process (GO:0051198)	6	0.0033265	DOWN
Tnfaip6	1.32134	2.75282e-17	8.43557e-16	UP		ncRNA processing (GO:0034470)	222	0.0033265	DOWN
Slc36a2	-0.942834	2.83164e-17	8.66232e-16	DOWN		macroautophagy (GO:0016236)	106	0.0033265	DOWN
Slc9a3	1.39054	3.12031e-17	9.52916e-16	UP		wound healing, spreading of epidermal cells (GO:0035313)	7	0.0033434	UP
Ric8b	-0.596185	3.40236e-17	1.03729e-15	DOWN		epithelial cell-cell adhesion (GO:0090136)	10	0.0033509	UP
Arhgef40	0.999086	3.62408e-17	1.10301e-15	UP		positive regulation of neuron projection development (GO:0010976)	94	0.0033788	UP
Snap91	0.781653	3.92953e-17	1.19395e-15	UP		regulation of oxidative phosphorylation (GO:0002082)	9	0.00343	DOWN
Shisa3	1.25838	4.09073e-17	1.24083e-15	UP		regulation of interleukin-8 production (GO:0032677)	33	0.0034998	UP
Dhrs9	2.40375	4.13967e-17	1.25356e-15	UP		positive regulation of leukocyte cell-cell adhesion (GO:1903039)	17	0.0035531	UP
Nnt	-0.735557	4.17744e-17	1.26287e-15	DOWN		regulation of cellular response to heat (GO:1900034)	76	0.0035564	DOWN
Gprc5b	0.86958	4.18914e-17	1.26428e-15	UP		receptor internalization (GO:0031623)	47	0.0035601	UP
Rbms3	0.83004	4.27745e-17	1.28876e-15	UP		sprouting angiogenesis (GO:0002040)	44	0.0035907	UP
Camkk2	0.571151	4.4228e-17	1.33032e-15	UP		negative regulation of response to external stimulus (GO:0032102)	91	0.0036073	UP
Tnn	3.22521	4.65716e-17	1.39847e-15	UP		regulation of cellular response to stress (GO:0080135)	102	0.003649	DOWN
Ubash3b	0.949491	4.68508e-17	1.40451e-15	UP		porphyrin-containing compound biosynthetic process (GO:0006779)	18	0.003649	DOWN
Magix	-0.933754	4.71483e-17	1.41107e-15	DOWN		T cell migration (GO:0072678)	13	0.0037	UP
Trappc9	-0.483354	4.7668e-17	1.42425e-15	DOWN		positive regulation of nitric oxide metabolic process (GO:1904407)	24	0.0037423	UP
Rmc1	-0.774052	5.64613e-17	1.68418e-15	DOWN		embryonic skeletal system development (GO:0048706)	20	0.0037423	UP
Prelp	1.42794	5.88673e-17	1.75304e-15	UP		positive regulation of tumor necrosis factor biosynthetic process (GO:0042535)	7	0.0037423	UP
Rnf166	-0.508698	5.93175e-17	1.76352e-15	DOWN		positive regulation of nitric oxide biosynthetic process (GO:0045429)	24	0.0037423	UP
Hs6st2	1.8578	6.86501e-17	2.0376e-15	UP		negative regulation of ossification (GO:0030279)	44	0.0037862	UP
Tmem143	-0.938217	6.94595e-17	2.05822e-15	DOWN		positive regulation of macromolecule biosynthetic process (GO:0010557)	131	0.0038085	UP
Entpd5	-0.881404	7.05218e-17	2.08626e-15	DOWN		4-hydroxyproline metabolic process (GO:0019471)	8	0.0038279	DOWN
Ecm1	1.2934	7.64791e-17	2.25878e-15	UP		embryonic skeletal system morphogenesis (GO:0048704)	21	0.0038391	UP
F2rl1	1.17391	7.85718e-17	2.31677e-15	UP		fatty acid beta-oxidation using acyl-CoA oxidase (GO:0033540)	14	0.0038396	DOWN
Eci1	-0.966441	8.35124e-17	2.45841e-15	DOWN		mitochondrial respiratory chain complex III biogenesis (GO:0097033)	10	0.0038396	DOWN
Ncf4	1.49712	8.38308e-17	2.46375e-15	UP		calcium-dependent cell-cell adhesion via plasma membrane cell adhesion molecules (GO:0016339)	39	0.0038404	UP
Kiz	-0.732598	8.51504e-17	2.49844e-15	DOWN		negative regulation of endocytosis (GO:0045806)	27	0.0038404	UP
Mob1a	0.54436	8.55044e-17	2.50473e-15	UP		cellular response to tumor necrosis factor (GO:0071356)	172	0.0038686	UP
Sgca	-0.75567	8.64732e-17	2.52899e-15	DOWN		negative regulation of platelet aggregation (GO:0090331)	8	0.0038791	UP
Tnni3k	-0.746004	8.66468e-17	2.52995e-15	DOWN		embryonic organ morphogenesis (GO:0048562)	33	0.0038848	UP
Mccc1	-0.73373	8.68332e-17	2.53127e-15	DOWN		positive regulation of smooth muscle cell proliferation (GO:0048661)	36	0.0038946	UP
Ucp3	-1.03135	9.16455e-17	2.66723e-15	DOWN		T cell activation involved in immune response (GO:0002286)	12	0.0039601	UP
Col4a1	1.4034	9.26332e-17	2.68871e-15	UP		marginal zone B cell differentiation (GO:0002315)	7	0.0039687	UP
Coq10a	-0.85679	9.26831e-17	2.68871e-15	DOWN		regulation of transforming growth factor beta production (GO:0071634)	10	0.0039687	UP
Nckap1l	1.22236	9.9256e-17	2.87474e-15	UP		myeloid leukocyte differentiation (GO:0002573)	48	0.0039866	UP
Dnajc28	-0.892842	1.05664e-16	3.05541e-15	DOWN		regulation of metaphase/anaphase transition of cell cycle (GO:1902099)	8	0.0040414	UP
Mrps35	-0.72624	1.07151e-16	3.09343e-15	DOWN		regulation of fibroblast growth factor receptor signaling pathway (GO:0040036)	20	0.0041277	UP
Cadm4	-0.724456	1.08957e-16	3.14051e-15	DOWN		cardiac muscle contraction (GO:0060048)	35	0.0041386	DOWN
Olfr1023	1.417	1.10774e-16	3.18526e-15	UP		regulation of lipid metabolic process (GO:0019216)	95	0.0041386	DOWN
Lcp1	1.16919	1.10864e-16	3.18526e-15	UP		regulation of cytokine secretion (GO:0050707)	28	0.0042488	UP
Hist2h2be	-0.717316	1.11445e-16	3.19685e-15	DOWN		positive regulation of stress-activated MAPK cascade (GO:0032874)	75	0.0042717	UP
Sdha	-0.794271	1.15825e-16	3.31717e-15	DOWN		actin filament depolymerization (GO:0030042)	10	0.0043013	UP
Aig1	-0.592591	1.20435e-16	3.44372e-15	DOWN		heart morphogenesis (GO:0003007)	49	0.0043426	UP
Rpa1	-0.403581	1.21796e-16	3.47709e-15	DOWN		actin filament bundle organization (GO:0061572)	35	0.0044378	UP
S100a6	1.26666	1.22846e-16	3.50151e-15	UP		regulation of cell migration involved in sprouting angiogenesis (GO:0090049)	30	0.0044669	UP
Galnt16	0.9773	1.23958e-16	3.52759e-15	UP		negative regulation of interferon-gamma production (GO:0032689)	18	0.0044818	UP
Cgref1	1.21498	1.30098e-16	3.69648e-15	UP		negative regulation of chemokine production (GO:0032682)	13	0.0044818	UP
Fcgr3	0.956255	1.34025e-16	3.80203e-15	UP		regulation of programmed cell death (GO:0043067)	248	0.0045729	UP
Aldh18a1	0.825691	1.4e-16	3.96527e-15	UP		epithelial cell migration (GO:0010631)	32	0.0046292	UP
Ncf1	1.07144	1.41924e-16	4.01344e-15	UP		cellular polysaccharide biosynthetic process (GO:0033692)	19	0.0046628	UP
Rasd2	-0.984166	1.44107e-16	4.06876e-15	DOWN		proteoglycan metabolic process (GO:0006029)	19	0.0046628	UP
Basp1	1.76406	1.46404e-16	4.12712e-15	UP		positive regulation of lipid transport (GO:0032370)	7	0.0046675	UP
Cdk1	2.23923	1.51459e-16	4.26294e-15	UP		cellular response to caffeine (GO:0071313)	7	0.0046812	DOWN
Fto	-0.371037	1.53364e-16	4.3098e-15	DOWN		response to caffeine (GO:0031000)	7	0.0046812	DOWN
Cmtm8	-0.969478	1.54165e-16	4.32553e-15	DOWN		protein import into mitochondrial matrix (GO:0030150)	18	0.0046812	DOWN
Abca4	-1.37992	1.55708e-16	4.36201e-15	DOWN		negative regulation of defense response (GO:0031348)	69	0.0047273	UP
Ptcd3	-0.587468	1.5899e-16	4.447e-15	DOWN		positive regulation of lymphocyte migration (GO:2000403)	15	0.0047382	UP
Kcnd1	1.34636	1.67191e-16	4.66912e-15	UP		phagosome maturation (GO:0090382)	29	0.0047945	UP
Tpbg	2.23094	1.68196e-16	4.68991e-15	UP		positive regulation of endothelial cell proliferation (GO:0001938)	65	0.0047945	UP
Fcgr2b	0.950395	1.68807e-16	4.69963e-15	UP		macrophage chemotaxis (GO:0048246)	9	0.0048267	UP
Itgam	1.21675	1.74822e-16	4.85955e-15	UP		macrophage migration (GO:1905517)	9	0.0048267	UP
Zfp365	1.81344	1.76214e-16	4.88691e-15	UP		regulation of endopeptidase activity (GO:0052548)	52	0.0048818	UP
Egln1	-0.675748	1.7635e-16	4.88691e-15	DOWN		regulation of multicellular organismal development (GO:2000026)	37	0.0049909	UP
Slc25a20	-0.729349	1.78539e-16	4.93995e-15	DOWN		positive regulation of phosphate metabolic process (GO:0045937)	24	0.0049909	UP
Gja5	0.816155	1.85066e-16	5.11266e-15	UP		regulation of macrophage cytokine production (GO:0010935)	9	0.0049909	UP
Ndufv1	-0.729377	1.92537e-16	5.31089e-15	DOWN		citrulline metabolic process (GO:0000052)	6	0.0049924	UP
Sec1	1.91413	2.02778e-16	5.58479e-15	UP		regulation of T cell apoptotic process (GO:0070232)	8	0.0049924	UP
Myh8	2.23104	2.07252e-16	5.69926e-15	UP		negative regulation of protein processing (GO:0010955)	12	0.0049952	UP
Bcl2a1b	2.86906	2.09653e-16	5.75647e-15	UP		negative regulation of glial cell apoptotic process (GO:0034351)	7	0.0050196	UP
Faap20	0.690335	2.15961e-16	5.92064e-15	UP		endocardial cushion development (GO:0003197)	19	0.005041	UP
Kcnip2	-1.06309	2.66198e-16	7.28675e-15	DOWN		positive regulation of osteoblast proliferation (GO:0033690)	5	0.0050459	UP
Atp5c1	-0.600586	2.71977e-16	7.43362e-15	DOWN		positive regulation of nucleic acid-templated transcription (GO:1903508)	478	0.0050708	UP
Igfbp2	4.84893	2.8021e-16	7.64702e-15	UP		regulation of chromosome segregation (GO:0051983)	25	0.0050858	UP
Cyp7b1	1.50992	2.97435e-16	8.10476e-15	UP		negative regulation of antigen receptor-mediated signaling pathway (GO:0050858)	14	0.005112	UP
Islr	1.4669	3.09352e-16	8.41673e-15	UP		RNA splicing (GO:0008380)	104	0.0051308	DOWN
Rhbdl3	-0.762742	3.43189e-16	9.31303e-15	DOWN		positive regulation of reactive oxygen species biosynthetic process (GO:1903428)	28	0.0051507	UP
Poln	-1.91983	3.43333e-16	9.31303e-15	DOWN		stem cell differentiation (GO:0048863)	32	0.0051737	UP
Etfb	-0.997999	3.46641e-16	9.38859e-15	DOWN		regulation of extracellular matrix disassembly (GO:0010715)	14	0.0051737	UP
Grk5	0.825639	3.50649e-16	9.48285e-15	UP		protein depolymerization (GO:0051261)	24	0.0051742	UP
Cpeb3	-1.0218	3.5792e-16	9.66492e-15	DOWN		regulation of striated muscle contraction (GO:0006942)	28	0.0052094	DOWN
Pts	-0.536205	4.03566e-16	1.08811e-14	DOWN		regulation of T-helper 1 cell differentiation (GO:0045625)	7	0.0052241	UP
Mxra8	1.33327	4.05349e-16	1.09128e-14	UP		regulation of toll-like receptor 2 signaling pathway (GO:0034135)	8	0.0052775	UP
Fcer1g	1.15233	4.068e-16	1.09355e-14	UP		purine ribonucleotide biosynthetic process (GO:0009152)	69	0.0052846	DOWN
Cpz	1.96702	4.15741e-16	1.11591e-14	UP		positive regulation of plasma membrane bounded cell projection assembly (GO:0120034)	65	0.0053526	UP
Hibadh	-0.631315	4.27042e-16	1.14435e-14	DOWN		mesenchyme morphogenesis (GO:0072132)	15	0.0053526	UP
Slc27a3	1.74928	4.2761e-16	1.14435e-14	UP		sensory perception of mechanical stimulus (GO:0050954)	72	0.0053589	UP
Hk2	-0.636923	4.32916e-16	1.15683e-14	DOWN		biomineral tissue development (GO:0031214)	5	0.0053748	UP
Aldh1a2	1.14706	4.36249e-16	1.164e-14	UP		positive regulation of astrocyte differentiation (GO:0048711)	9	0.0054853	UP
Kif26b	1.33974	4.40839e-16	1.1745e-14	UP		negative regulation of lymphocyte proliferation (GO:0050672)	25	0.0054853	UP
Cx3cl1	1.28171	4.5388e-16	1.20715e-14	UP		negative regulation of cellular response to transforming growth factor beta stimulus (GO:1903845)	50	0.0054853	UP
Pik3r5	1.47443	4.54438e-16	1.20715e-14	UP		positive regulation of cytoskeleton organization (GO:0051495)	74	0.0054853	UP
Cyb5rl	-0.867301	4.55555e-16	1.20833e-14	DOWN		heme biosynthetic process (GO:0006783)	16	0.0055202	DOWN
Eef1a1	0.849284	4.73957e-16	1.25529e-14	UP		regulation of ATP biosynthetic process (GO:2001169)	8	0.005539	DOWN
Hhipl1	1.44172	4.75369e-16	1.25717e-14	UP		heterocycle catabolic process (GO:0046700)	5	0.005539	DOWN
Klhl23	-0.618166	4.79067e-16	1.26509e-14	DOWN		nucleotide-excision repair, preincision complex assembly (GO:0006294)	29	0.005539	DOWN
Gzmm	-0.917217	5.16227e-16	1.36122e-14	DOWN		negative regulation of MAP kinase activity (GO:0043407)	57	0.0055805	UP
Bckdha	-0.933695	5.18589e-16	1.36544e-14	DOWN		immunoglobulin mediated immune response (GO:0016064)	7	0.0055868	UP
Mgat5b	2.19977	5.56922e-16	1.46422e-14	UP		regulation of hormone secretion (GO:0046883)	12	0.0055868	UP
Padi4	1.81064	5.61256e-16	1.47346e-14	UP		myeloid cell development (GO:0061515)	14	0.0055868	UP
Prrg3	0.866435	5.78772e-16	1.51723e-14	UP		positive regulation of cell activation (GO:0050867)	9	0.0056159	UP
Nmrk2	1.75379	6.29983e-16	1.64907e-14	UP		negative regulation of leukocyte degranulation (GO:0043301)	6	0.0056161	UP
Sgcg	-0.438305	6.62112e-16	1.73065e-14	DOWN		positive regulation of myeloid leukocyte differentiation (GO:0002763)	31	0.0056858	UP
Col4a2	1.23522	6.93039e-16	1.80885e-14	UP		negative regulation of leukocyte cell-cell adhesion (GO:1903038)	11	0.0057083	UP
Alad	-0.809009	7.31211e-16	1.90571e-14	DOWN		negative regulation of cellular biosynthetic process (GO:0031327)	43	0.005789	UP
Olr1	2.96918	7.55418e-16	1.96595e-14	UP		spliceosomal snRNP assembly (GO:0000387)	37	0.0058771	DOWN
Decr1	-0.817469	7.66418e-16	1.99169e-14	DOWN		regulation of DNA replication (GO:0006275)	57	0.005974	UP
mt-Nd1	-0.69637	7.67611e-16	1.99191e-14	DOWN		regulation of cellular amine metabolic process (GO:0033238)	50	0.0060225	DOWN
Gpx7	1.02315	7.68932e-16	1.99245e-14	UP		regulation of cellular amino acid metabolic process (GO:0006521)	50	0.0060225	DOWN
Slc6a17	-1.07707	7.86817e-16	2.03586e-14	DOWN		positive chemotaxis (GO:0050918)	16	0.0060318	UP
Hdac11	-0.792242	8.04606e-16	2.07889e-14	DOWN		methionine metabolic process (GO:0006555)	11	0.0060744	DOWN
Myl2	-0.67114	8.21482e-16	2.11945e-14	DOWN		nucleotide-excision repair, preincision complex stabilization (GO:0006293)	21	0.0060744	DOWN
Mtfp1	-0.842052	8.25945e-16	2.1279e-14	DOWN		nucleotide-excision repair, DNA incision, 3 -to lesion (GO:0006295)	21	0.0060744	DOWN
Itgax	2.81681	8.69472e-16	2.23684e-14	UP		embryonic digestive tract development (GO:0048566)	19	0.006118	UP
Xirp2	1.14272	9.60133e-16	2.46654e-14	UP		tRNA 3 -end processing (GO:0042780)	6	0.0061474	DOWN
Atp8b4	1.50205	1.0035e-15	2.57242e-14	UP		negative regulation of cell differentiation (GO:0045596)	146	0.0061667	UP
Fgr	2.75167	1.00421e-15	2.57242e-14	UP		osteoclast differentiation (GO:0030316)	19	0.0064473	UP
Gnb3	-0.851217	1.03514e-15	2.64785e-14	DOWN		regulation of chemotaxis (GO:0050920)	21	0.0064473	UP
Snrpn	-0.634417	1.11566e-15	2.84977e-14	DOWN		positive regulation of apoptotic process (GO:0043065)	285	0.0064473	UP
Cd14	1.10865	1.15082e-15	2.93541e-14	UP		regulation of actin filament polymerization (GO:0030833)	65	0.0064561	UP
Tmem65	-0.609572	1.16365e-15	2.96394e-14	DOWN		positive regulation of macrophage activation (GO:0043032)	16	0.0064561	UP
Bcat1	1.46181	1.40176e-15	3.56537e-14	UP		actin filament bundle assembly (GO:0051017)	37	0.0065156	UP
Drd2	-0.972872	1.44589e-15	3.67239e-14	DOWN		regulation of lamellipodium organization (GO:1902743)	17	0.0065156	UP
Lrrc52	-1.23521	1.47725e-15	3.74676e-14	DOWN		response to heparin (GO:0071503)	6	0.0065585	UP
Adk	-0.545878	1.50525e-15	3.81237e-14	DOWN		mitochondrial respiratory chain complex IV biogenesis (GO:0097034)	20	0.0065829	DOWN
Crat	-0.83439	1.58256e-15	4.00253e-14	DOWN		positive regulation of protein localization to membrane (GO:1905477)	90	0.0066037	UP
Ldhd	-1.11711	1.63111e-15	4.11952e-14	DOWN		positive regulation of cytosolic calcium ion concentration involved in phospholipase C-activating G-protein coupled signaling pathway (GO:0051482)	20	0.0066224	UP
Lgals4	-1.52553	1.72326e-15	4.34614e-14	DOWN		positive regulation of blood vessel endothelial cell migration (GO:0043536)	45	0.0066407	UP
Ppm1k	-1.12601	1.73216e-15	4.35748e-14	DOWN		rRNA processing (GO:0006364)	196	0.0066446	DOWN
Antxr1	1.43265	1.73261e-15	4.35748e-14	UP		nucleotide-excision repair, DNA incision (GO:0033683)	38	0.0066446	DOWN
Uck2	1.40191	1.8295e-15	4.59474e-14	UP		regulation of T-helper 2 cell differentiation (GO:0045628)	8	0.0068735	UP
Sardh	0.980988	1.84492e-15	4.62698e-14	UP		regulation of cellular component movement (GO:0051270)	45	0.0068766	UP
Nadk2	-0.963283	1.86407e-15	4.66849e-14	DOWN		aminoglycan catabolic process (GO:0006026)	29	0.0070187	UP
Ndufs1	-0.665984	1.86733e-15	4.67016e-14	DOWN		negative regulation of platelet activation (GO:0010544)	15	0.0070187	UP
Cpt2	-0.837475	1.99615e-15	4.98538e-14	DOWN		mitochondrial respiratory chain complex IV assembly (GO:0033617)	19	0.0071055	DOWN
Cxcl2	3.09292	2.01658e-15	5.0294e-14	UP		positive regulation of transcription, DNA-templated (GO:0045893)	1036	0.0071772	UP
Col4a4	1.00889	2.02077e-15	5.03287e-14	UP		response to prostaglandin E (GO:0034695)	11	0.0071894	UP
D2hgdh	-0.734644	2.09153e-15	5.20187e-14	DOWN		regulation of proteasomal protein catabolic process (GO:0061136)	39	0.0072029	DOWN
Phldb2	0.938081	2.1867e-15	5.43105e-14	UP		regulation of chemokine-mediated signaling pathway (GO:0070099)	6	0.0073078	UP
Actg2	1.6392	2.25949e-15	5.6041e-14	UP		lysine metabolic process (GO:0006553)	12	0.0073298	DOWN
Nsmaf	-0.57631	2.2972e-15	5.68976e-14	DOWN		lysine catabolic process (GO:0006554)	12	0.0073298	DOWN
Fam167a	2.04149	2.44762e-15	6.05399e-14	UP		glycogen catabolic process (GO:0005980)	16	0.0073804	DOWN
Ccdc88a	0.750765	2.54917e-15	6.29648e-14	UP		sequestering of extracellular ligand from receptor (GO:0035581)	6	0.00739	UP
Wnt4	1.26425	2.57212e-15	6.34445e-14	UP		ornithine metabolic process (GO:0006591)	9	0.0073993	UP
Rxra	-0.592711	2.57669e-15	6.347e-14	DOWN		cellular response to organic cyclic compound (GO:0071407)	130	0.0073993	UP
Cacnb3	1.48131	2.63743e-15	6.48772e-14	UP		regulation of osteoclast differentiation (GO:0045670)	31	0.0074265	UP
Clca3a1	1.72967	2.74738e-15	6.74893e-14	UP		negative regulation of cytosolic calcium ion concentration (GO:0051481)	5	0.0074412	DOWN
Rnf123	-0.476098	2.76977e-15	6.79463e-14	DOWN		renal system development (GO:0072001)	58	0.0074887	UP
Acy1	-0.896958	2.80383e-15	6.86881e-14	DOWN		ameboidal-type cell migration (GO:0001667)	38	0.0074923	UP
Fam114a1	1.11657	2.92618e-15	7.15036e-14	UP		regulation of transcription from RNA polymerase II promoter in response to stress (GO:0043618)	88	0.0076116	DOWN
Fyco1	-1.08717	2.92672e-15	7.15036e-14	DOWN		regulation of cell-substrate adhesion (GO:0010810)	32	0.0076442	UP
Plod2	0.74246	2.9865e-15	7.2865e-14	UP		regulation of granulocyte chemotaxis (GO:0071622)	11	0.0078572	UP
Dcaf11	-0.616455	2.99514e-15	7.29767e-14	DOWN		cell projection assembly (GO:0030031)	20	0.0078572	UP
Asb15	-1.14958	3.00494e-15	7.30636e-14	DOWN		regulation of cytokine-mediated signaling pathway (GO:0001959)	78	0.0078572	UP
Tbx20	0.678942	3.00685e-15	7.30636e-14	UP		negative regulation of viral life cycle (GO:1903901)	47	0.0079378	UP
Cox7a1	-1.07937	3.10475e-15	7.53405e-14	DOWN		regulation of cell differentiation (GO:0045595)	111	0.0080994	UP
Sh3bp2	1.17543	3.46881e-15	8.40614e-14	UP		negative regulation of bone resorption (GO:0045779)	6	0.0080994	UP
Cngb3	-2.1356	3.49074e-15	8.44788e-14	DOWN		positive regulation of toll-like receptor signaling pathway (GO:0034123)	19	0.0080994	UP
Gm3776	-1.36641	3.51675e-15	8.49938e-14	DOWN		positive regulation of sprouting angiogenesis (GO:1903672)	27	0.0080994	UP
Pros1	0.539391	3.56435e-15	8.60283e-14	UP		regulation of dendritic cell antigen processing and presentation (GO:0002604)	7	0.008227	UP
Parvg	1.27191	3.66954e-15	8.84483e-14	UP		regulation of lamellipodium morphogenesis (GO:2000392)	11	0.0082505	UP
Col4a5	0.718501	3.97203e-15	9.56109e-14	UP		cellular response to growth factor stimulus (GO:0071363)	135	0.0083054	UP
Kctd11	1.02504	4.00178e-15	9.6198e-14	UP		regulation of receptor binding (GO:1900120)	8	0.0083351	UP
Nnmt	1.30749	4.03444e-15	9.68535e-14	UP		cellular response to prostaglandin E stimulus (GO:0071380)	8	0.0084513	UP
Ptx4	3.47147	4.25016e-15	1.01896e-13	UP		positive regulation of B cell proliferation (GO:0030890)	28	0.008548	UP
Etfdh	-0.751478	4.30248e-15	1.03013e-13	DOWN		autophagy of mitochondrion (GO:0000422)	37	0.0085794	DOWN
Rab32	1.44645	4.32075e-15	1.03313e-13	UP		protein localization to kinetochore (GO:0034501)	12	0.0087115	UP
Reep5	-0.55446	4.59037e-15	1.09613e-13	DOWN		negative regulation of developmental process (GO:0051093)	65	0.0087115	UP
Adcy2	1.96597	4.61417e-15	1.10035e-13	UP		positive regulation of cell projection organization (GO:0031346)	61	0.0087115	UP
Ybx2	-1.18801	4.73436e-15	1.12752e-13	DOWN		myeloid cell activation involved in immune response (GO:0002275)	10	0.0087189	UP
Gpr22	-1.26639	4.77967e-15	1.1368e-13	DOWN		protein autophosphorylation (GO:0046777)	173	0.0087914	UP
Ckap4	1.11635	5.26586e-15	1.25078e-13	UP		granulocyte activation (GO:0036230)	6	0.0088113	UP
Scg2	5.26801	5.33091e-15	1.26456e-13	UP		positive regulation of peptidase activity (GO:0010952)	11	0.0089178	DOWN
Pdss2	-0.703591	5.37816e-15	1.27408e-13	DOWN		mitochondrion disassembly (GO:0061726)	35	0.0089178	DOWN
Col5a3	1.74296	5.6631e-15	1.3392e-13	UP		positive regulation of insulin-like growth factor receptor signaling pathway (GO:0043568)	6	0.0089324	UP
Fgfr2	2.42507	5.66792e-15	1.3392e-13	UP		mitotic sister chromatid segregation (GO:0000070)	78	0.0089588	UP
Ppfibp1	0.38858	5.79876e-15	1.36831e-13	UP		positive regulation of programmed cell death (GO:0043068)	241	0.0089677	UP
Ptpn1	0.523204	5.83111e-15	1.37414e-13	UP		regulation of stem cell proliferation (GO:0072091)	16	0.0090805	UP
Scpep1	1.08594	5.85588e-15	1.37816e-13	UP		regulation of apoptotic cell clearance (GO:2000425)	7	0.009172	UP
Pttg1	-0.623841	5.91795e-15	1.39095e-13	DOWN		regulation of superoxide metabolic process (GO:0090322)	6	0.0092219	UP
Cttn	0.569497	6.06715e-15	1.42416e-13	UP		integrin activation (GO:0033622)	8	0.0092219	UP
Ttc32	-0.78389	6.25999e-15	1.4675e-13	DOWN		terpenoid metabolic process (GO:0006721)	3	0.0092772	DOWN
Nudt14	-0.679268	6.27029e-15	1.468e-13	DOWN		import across plasma membrane (GO:0098739)	11	0.0092772	DOWN
Foxo4	-0.499498	6.30288e-15	1.47371e-13	DOWN		positive regulation of glial cell differentiation (GO:0045687)	9	0.0094564	UP
Etv5	0.675429	6.35277e-15	1.48344e-13	UP		arginine metabolic process (GO:0006525)	11	0.0095883	UP
Shisa6	-1.62717	6.53067e-15	1.523e-13	DOWN		nucleotide-excision repair, DNA incision, 5 -to lesion (GO:0006296)	36	0.0097006	DOWN
Tspan17	0.93907	6.91166e-15	1.60976e-13	UP		respiratory chain complex III assembly (GO:0017062)	9	0.0097006	DOWN
2200002D01Rik	1.68376	6.92793e-15	1.61146e-13	UP		mitochondrial respiratory chain complex III assembly (GO:0034551)	9	0.0097006	DOWN
Chsy1	0.741177	7.03594e-15	1.63447e-13	UP		long-chain fatty acid import (GO:0044539)	7	0.0097502	DOWN
Itga10	1.19002	7.05104e-15	1.63586e-13	UP		negative chemotaxis (GO:0050919)	26	0.0097928	UP
Sorbs2	0.515158	7.19836e-15	1.66788e-13	UP		negative regulation of cytokine production involved in immune response (GO:0002719)	14	0.010019	UP
Tgfbr1	0.854098	7.20877e-15	1.66814e-13	UP		thyroid hormone generation (GO:0006590)	10	0.0101	UP
Tmem182	-0.551198	7.2831e-15	1.68317e-13	DOWN		retinal metabolic process (GO:0042574)	8	0.010204	UP
Dlg2	1.60349	7.69555e-15	1.77621e-13	UP		regulation of heterotypic cell-cell adhesion (GO:0034114)	18	0.010222	UP
Dennd4b	-0.723154	7.98437e-15	1.84051e-13	DOWN		regulation of blood vessel diameter (GO:0097746)	25	0.010222	UP
Stau2	-0.420561	8.01463e-15	1.84511e-13	DOWN		peptidyl-tyrosine dephosphorylation (GO:0035335)	24	0.010222	UP
Aqp5	5.01341	8.05398e-15	1.8518e-13	UP		spinal cord development (GO:0021510)	11	0.010222	UP
Magt1	-0.583166	8.17502e-15	1.87722e-13	DOWN		tRNA processing (GO:0008033)	58	0.01042	DOWN
Rmnd1	-0.917971	8.75737e-15	2.00838e-13	DOWN		negative regulation of smooth muscle cell proliferation (GO:0048662)	27	0.010482	UP
Trpm4	-0.546283	8.84524e-15	2.02594e-13	DOWN		positive regulation of peptide secretion (GO:0002793)	33	0.010642	UP
Twist1	1.33959	8.92758e-15	2.0422e-13	UP		dendritic cell chemotaxis (GO:0002407)	15	0.010674	UP
Mpst	-0.611512	9.03228e-15	2.06352e-13	DOWN		positive regulation of extrinsic apoptotic signaling pathway (GO:2001238)	28	0.010695	UP
Fbxo31	-1.01733	9.33641e-15	2.13029e-13	DOWN		regulation of B cell proliferation (GO:0030888)	40	0.010751	UP
Idh1	-0.523898	9.3879e-15	2.13932e-13	DOWN		lymphocyte proliferation (GO:0046651)	23	0.010765	UP
Epm2a	-0.546404	9.44664e-15	2.14932e-13	DOWN		negative regulation of smooth muscle cell migration (GO:0014912)	14	0.010813	UP
Lrpprc	-0.638664	9.45571e-15	2.14932e-13	DOWN		cellular response to organic substance (GO:0071310)	127	0.010867	UP
Dgat2	-1.07974	9.7212e-15	2.20687e-13	DOWN		positive regulation of MAP kinase activity (GO:0043406)	170	0.010909	UP
BC004004	-0.636166	9.75582e-15	2.21193e-13	DOWN		negative regulation of macromolecule metabolic process (GO:0010605)	117	0.010909	UP
Dnm1	0.919321	9.80237e-15	2.21969e-13	UP		negative regulation of extrinsic apoptotic signaling pathway via death domain receptors (GO:1902042)	27	0.011106	UP
Eya4	2.21167	9.89548e-15	2.23795e-13	UP		toll-like receptor 4 signaling pathway (GO:0034142)	14	0.011218	UP
Msh2	-0.486794	9.98979e-15	2.25644e-13	DOWN		sphingolipid metabolic process (GO:0006665)	105	0.011433	UP
Tmem176b	0.955805	1.00065e-14	2.25737e-13	UP		negative regulation of protein binding (GO:0032091)	63	0.011436	UP
Dsel	0.877675	1.0063e-14	2.26726e-13	UP		regulation of protein autophosphorylation (GO:0031952)	29	0.011441	UP
Ddx59	-0.621001	1.02421e-14	2.30474e-13	DOWN		positive regulation of antigen receptor-mediated signaling pathway (GO:0050857)	16	0.011466	UP
Map1b	1.26516	1.03676e-14	2.33005e-13	UP		regulation of mitotic nuclear division (GO:0007088)	82	0.011466	UP
Slc22a5	-0.66297	1.05314e-14	2.36356e-13	DOWN		positive regulation of protein modification process (GO:0031401)	155	0.011586	UP
Smim20	-0.689825	1.0543e-14	2.36356e-13	DOWN		regulation of endothelial cell apoptotic process (GO:2000351)	32	0.011624	UP
Mical1	1.01771	1.09011e-14	2.44078e-13	UP		positive regulation of cellular component movement (GO:0051272)	20	0.011767	UP
Gpr27	-0.675411	1.09396e-14	2.44636e-13	DOWN		positive regulation of protein localization to cell periphery (GO:1904377)	45	0.011767	UP
Prrx2	3.28051	1.09645e-14	2.44887e-13	UP		negative regulation of immune system process (GO:0002683)	34	0.011847	UP
Mybl1	1.39852	1.11771e-14	2.49327e-13	UP		regulation of sterol transport (GO:0032371)	7	0.011869	UP
Wnk2	-1.35613	1.12235e-14	2.5005e-13	DOWN		protein localization to mitochondrion (GO:0070585)	9	0.011881	DOWN
Olfm1	0.989249	1.12917e-14	2.51257e-13	UP		negative regulation of protein phosphorylation (GO:0001933)	172	0.011976	UP
Ccna2	1.92054	1.13241e-14	2.51666e-13	UP		establishment of protein localization to peroxisome (GO:0072663)	7	0.012018	DOWN
Slc20a2	-0.693288	1.24119e-14	2.75502e-13	DOWN		positive regulation of transforming growth factor beta production (GO:0071636)	8	0.012057	UP
Tmem167	0.59316	1.25814e-14	2.78918e-13	UP		regulation of B cell activation (GO:0050864)	18	0.012067	UP
Ikbke	1.71746	1.32324e-14	2.92759e-13	UP		receptor guanylyl cyclase signaling pathway (GO:0007168)	10	0.012067	UP
Arhgap22	1.07849	1.32383e-14	2.92759e-13	UP		respiratory system development (GO:0060541)	28	0.012067	UP
Ak4	-0.445405	1.39848e-14	3.08887e-13	DOWN		positive regulation of NF-kappaB transcription factor activity (GO:0051092)	123	0.012067	UP
Tmod4	-0.977677	1.44071e-14	3.17824e-13	DOWN		septin ring organization (GO:0031106)	3	0.012078	UP
Hnmt	-1.03882	1.47509e-14	3.25008e-13	DOWN		carnitine shuttle (GO:0006853)	11	0.012103	DOWN
Mettl7a1	-0.710541	1.48335e-14	3.26429e-13	DOWN		fatty acid transmembrane transport (GO:1902001)	11	0.012103	DOWN
Slc16a8	-1.33742	1.49029e-14	3.27554e-13	DOWN		regulation of cellular ketone metabolic process (GO:0010565)	60	0.012103	DOWN
Tmsb10	1.33045	1.58396e-14	3.47716e-13	UP		proteasomal protein catabolic process (GO:0010498)	231	0.012201	DOWN
Syk	0.54201	1.58931e-14	3.48464e-13	UP		negative regulation of BMP signaling pathway (GO:0030514)	29	0.012335	UP
Clmp	1.55814	1.60634e-14	3.51769e-13	UP		interferon-gamma-mediated signaling pathway (GO:0060333)	45	0.01255	UP
Slc25a11	-0.625114	1.60938e-14	3.52006e-13	DOWN		regulation of protein depolymerization (GO:1901879)	6	0.012589	UP
Tlr2	1.15632	1.6927e-14	3.69779e-13	UP		regulation of intracellular signal transduction (GO:1902531)	396	0.012612	UP
Cpxm1	1.19638	1.69795e-14	3.70476e-13	UP		positive regulation of cellular biosynthetic process (GO:0031328)	149	0.012612	UP
Aarsd1	-0.782179	1.70727e-14	3.72056e-13	DOWN		regulation of monocyte differentiation (GO:0045655)	13	0.012612	UP
Edem1	0.679811	1.7296e-14	3.76467e-13	UP		engulfment of apoptotic cell (GO:0043652)	9	0.012635	UP
Gab2	0.870719	1.78941e-14	3.89013e-13	UP		regulation of leukocyte degranulation (GO:0043300)	7	0.01267	UP
Dhdh	-0.734611	1.88103e-14	4.08435e-13	DOWN		negative regulation of multicellular organismal process (GO:0051241)	115	0.012714	UP
Tmem132e	2.30073	1.91118e-14	4.14481e-13	UP		B cell homeostasis (GO:0001782)	9	0.012714	UP
Spc25	1.85182	1.97005e-14	4.26733e-13	UP		peroxisomal transport (GO:0043574)	8	0.012806	DOWN
Nudt7	-0.614489	2.03138e-14	4.39488e-13	DOWN		response to vitamin D (GO:0033280)	8	0.013069	UP
Cdnf	-0.722648	2.04547e-14	4.42003e-13	DOWN		regulation of interferon-alpha production (GO:0032647)	15	0.01311	UP
Scn10a	-1.49994	2.09808e-14	4.52828e-13	DOWN		positive regulation of mesenchymal cell proliferation (GO:0002053)	11	0.013141	UP
Dhrs11	-0.748164	2.18271e-14	4.70527e-13	DOWN		regulation of astrocyte differentiation (GO:0048710)	10	0.013397	UP
Fh1	-0.646094	2.18549e-14	4.70562e-13	DOWN		regulation of cellular response to transforming growth factor beta stimulus (GO:1903844)	17	0.013421	UP
Rgs16	1.66125	2.29567e-14	4.93693e-13	UP		tRNA aminoacylation for mitochondrial protein translation (GO:0070127)	8	0.013591	DOWN
Ncf2	0.839793	2.32381e-14	4.99147e-13	UP		SCF-dependent proteasomal ubiquitin-dependent protein catabolic process (GO:0031146)	71	0.013629	DOWN
Asns	0.921561	2.34036e-14	5.02101e-13	UP		regulation of biomineral tissue development (GO:0070167)	12	0.013667	UP
Susd2	1.0625	2.38773e-14	5.11653e-13	UP		protein targeting to peroxisome (GO:0006625)	15	0.013689	DOWN
Gtse1	1.69003	2.45697e-14	5.25863e-13	UP		negative regulation of phagocytosis (GO:0050765)	9	0.013711	UP
Fbp2	-1.17751	2.46229e-14	5.26374e-13	DOWN		cortical cytoskeleton organization (GO:0030865)	29	0.01378	UP
Coq7	-0.665471	2.54891e-14	5.44243e-13	DOWN		metallo-sulfur cluster assembly (GO:0031163)	13	0.013832	DOWN
Slc30a4	0.607601	2.66028e-14	5.67347e-13	UP		sulfur amino acid metabolic process (GO:0000096)	21	0.013885	DOWN
Cog7	-0.461297	2.76364e-14	5.8869e-13	DOWN		respiratory tube development (GO:0030323)	24	0.014033	UP
Gid4	-0.620207	2.79908e-14	5.95533e-13	DOWN		positive regulation of epithelial cell migration (GO:0010634)	73	0.014047	UP
Vwa7	-0.45401	2.9063e-14	6.17614e-13	DOWN		cellular response to type I interferon (GO:0071357)	45	0.014047	UP
Pkia	-0.565065	3.01609e-14	6.40187e-13	DOWN		type I interferon signaling pathway (GO:0060337)	45	0.014047	UP
Pmp22	0.948197	3.0902e-14	6.55145e-13	UP		ribonucleoside monophosphate biosynthetic process (GO:0009156)	14	0.01417	DOWN
Gm8113	-0.755219	3.15042e-14	6.67124e-13	DOWN		diterpenoid metabolic process (GO:0016101)	56	0.014175	UP
Ank	-0.685733	3.1919e-14	6.75112e-13	DOWN		regulation of mast cell activation involved in immune response (GO:0033006)	7	0.014311	UP
Gpr65	1.27497	3.25021e-14	6.86637e-13	UP		smooth muscle cell migration (GO:0014909)	6	0.014615	UP
Tarsl2	-0.627848	3.30716e-14	6.97846e-13	DOWN		negative regulation of cell junction assembly (GO:1901889)	19	0.014683	UP
Galnt6	1.83147	3.41972e-14	7.2075e-13	UP		regulation of glomerular filtration (GO:0003093)	6	0.014712	UP
Faim2	5.31432	3.49317e-14	7.35368e-13	UP		cGMP biosynthetic process (GO:0006182)	21	0.014735	UP
Lrrc4b	-1.08145	3.66563e-14	7.7077e-13	DOWN		regulation of BMP signaling pathway (GO:0030510)	51	0.014888	UP
Sh2d1b1	2.86789	3.70827e-14	7.78823e-13	UP		arginine catabolic process (GO:0006527)	8	0.015021	UP
Mgrn1	-0.605181	3.86905e-14	8.11642e-13	DOWN		negative regulation of proteolysis (GO:0045861)	33	0.015033	UP
Txndc5	0.712585	3.89224e-14	8.15554e-13	UP		secretion (GO:0046903)	13	0.015156	UP
Rmnd5a	-0.550471	4.02775e-14	8.42964e-13	DOWN		regulation of vascular endothelial growth factor receptor signaling pathway (GO:0030947)	22	0.015229	UP
Ncoa7	0.748417	4.05043e-14	8.46724e-13	UP		negative regulation of nitric oxide metabolic process (GO:1904406)	7	0.015283	UP
Shox2	1.56206	4.36239e-14	9.10878e-13	UP		negative regulation of nitric oxide biosynthetic process (GO:0045019)	7	0.015283	UP
Cd109	1.94551	4.46019e-14	9.30216e-13	UP		negative regulation of B cell activation (GO:0050869)	16	0.015403	UP
Laptm5	1.13907	4.53465e-14	9.44649e-13	UP		activation of cysteine-type endopeptidase activity involved in apoptotic process (GO:0006919)	71	0.015627	UP
Epyc	4.24856	4.59323e-14	9.55744e-13	UP		pharyngeal arch artery morphogenesis (GO:0061626)	7	0.01564	UP
Fam129b	0.850968	4.66793e-14	9.70161e-13	UP		response to interleukin-6 (GO:0070741)	11	0.01564	UP
Cabcoco1	-0.968432	4.69004e-14	9.73631e-13	DOWN		positive regulation of extrinsic apoptotic signaling pathway via death domain receptors (GO:1902043)	6	0.01564	UP
Macrod1	-0.823328	5.35419e-14	1.11022e-12	DOWN		regulation of interleukin-12 production (GO:0032655)	32	0.01564	UP
Ppm1e	0.912994	5.43602e-14	1.12589e-12	UP		regulation of cell-cell adhesion (GO:0022407)	29	0.015773	UP
Arf4	0.690379	5.52814e-14	1.14365e-12	UP		glyoxylate metabolic process (GO:0046487)	6	0.015799	DOWN
Atp2a2	-0.96026	5.88299e-14	1.21494e-12	DOWN		adenylate cyclase-modulating G-protein coupled receptor signaling pathway (GO:0007188)	120	0.015814	UP
Ccbe1	-0.896511	5.88628e-14	1.21494e-12	DOWN		imidazole-containing compound catabolic process (GO:0052805)	7	0.01587	DOWN
Ctla4	-1.57586	6.07615e-14	1.25269e-12	DOWN		histidine metabolic process (GO:0006547)	7	0.01587	DOWN
Birc5	1.37447	6.69699e-14	1.3791e-12	UP		histidine catabolic process (GO:0006548)	7	0.01587	DOWN
Serping1	0.899767	6.96565e-14	1.43279e-12	UP		transmembrane receptor protein tyrosine phosphatase signaling pathway (GO:0007185)	6	0.015891	UP
Slc25a42	-0.934404	7.13369e-14	1.46567e-12	DOWN		regulation of SMAD protein import into nucleus (GO:0060390)	14	0.015942	UP
Bcat2	-0.716304	7.45765e-14	1.53048e-12	DOWN		endothelial cell migration (GO:0043542)	30	0.015987	UP
Mrgprh	-1.54606	7.98097e-14	1.63601e-12	DOWN		amino acid import across plasma membrane (GO:0089718)	7	0.01615	UP
Lyz2	1.26728	8.04387e-14	1.64702e-12	UP		angiogenesis involved in wound healing (GO:0060055)	8	0.016158	UP
Adgra2	0.869446	8.21584e-14	1.68032e-12	UP		proteolysis (GO:0006508)	259	0.016158	UP
Sema6c	-0.68751	8.26283e-14	1.68801e-12	DOWN		regulation of establishment of protein localization to mitochondrion (GO:1903747)	8	0.016313	DOWN
Cthrc1	5.47333	8.46073e-14	1.72647e-12	UP		positive regulation of transport (GO:0051050)	43	0.016325	UP
Kcnj6	2.0259	8.60642e-14	1.75421e-12	UP		negative regulation of homotypic cell-cell adhesion (GO:0034111)	9	0.016325	UP
Zdhhc20	0.749157	8.93527e-14	1.81917e-12	UP		regulation of cell cycle process (GO:0010564)	88	0.016522	UP
Cpne2	0.777159	9.24448e-14	1.87999e-12	UP		positive regulation of mast cell degranulation (GO:0043306)	7	0.016522	UP
Etfbkmt	-0.99444	9.27434e-14	1.88393e-12	DOWN		positive regulation of JNK cascade (GO:0046330)	72	0.016522	UP
Ctsz	1.10701	9.29459e-14	1.88591e-12	UP		positive regulation of actin filament depolymerization (GO:0030836)	10	0.016522	UP
Gstm2	-0.599354	9.3245e-14	1.88984e-12	DOWN		regulation of T cell receptor signaling pathway (GO:0050856)	24	0.016679	UP
Gcnt1	1.12901	9.71087e-14	1.96593e-12	UP		T-helper cell lineage commitment (GO:0002295)	8	0.016679	UP
Osgepl1	-0.850987	9.83191e-14	1.98819e-12	DOWN		cellular response to alcohol (GO:0097306)	27	0.016726	UP
Tyrobp	1.28371	9.92705e-14	2.00517e-12	UP		positive regulation of CD4-positive, alpha-beta T cell activation (GO:2000516)	7	0.016789	UP
Plekhd1	2.50404	1.02094e-13	2.0599e-12	UP		heterotypic cell-cell adhesion (GO:0034113)	22	0.016814	UP
Abcd3	-0.539014	1.02972e-13	2.07528e-12	DOWN		regulation of mitotic cell cycle (GO:0007346)	160	0.017076	UP
Nek2	2.34965	1.05504e-13	2.12392e-12	UP		positive regulation of apoptotic cell clearance (GO:2000427)	6	0.017078	UP
Cotl1	1.12984	1.06905e-13	2.1497e-12	UP		positive regulation of GTPase activity (GO:0043547)	164	0.01721	UP
Kif3b	0.44086	1.08776e-13	2.18489e-12	UP		epithelial tube morphogenesis (GO:0060562)	34	0.01721	UP
Prkag1	-0.497929	1.10338e-13	2.21379e-12	DOWN		positive regulation of mitotic cell cycle (GO:0045931)	50	0.017229	UP
Alcam	1.16219	1.14912e-13	2.30298e-12	UP		regulation of interleukin-2 production (GO:0032663)	21	0.017229	UP
Acad11	-0.672346	1.19329e-13	2.38884e-12	DOWN		glycolipid metabolic process (GO:0006664)	55	0.017241	UP
Fkbp4	-0.984569	1.20215e-13	2.4039e-12	DOWN		regulation of axonogenesis (GO:0050770)	54	0.017466	UP
Gpt2	-1.28447	1.21403e-13	2.42495e-12	DOWN		rRNA methylation (GO:0031167)	20	0.017519	DOWN
Selplg	1.03777	1.22809e-13	2.45031e-12	UP		regulation of cardiac muscle cell membrane potential (GO:0086036)	7	0.017554	DOWN
Clcn1	-1.9325	1.26067e-13	2.51252e-12	DOWN		activin receptor signaling pathway (GO:0032924)	16	0.017556	UP
Il1b	2.85755	1.28283e-13	2.55386e-12	UP		somite development (GO:0061053)	11	0.017913	UP
Coq8a	-0.607667	1.29707e-13	2.57934e-12	DOWN		negative regulation of osteoclast differentiation (GO:0045671)	13	0.018004	UP
Oxld1	-0.856275	1.30747e-13	2.59467e-12	DOWN		regulation of neuron apoptotic process (GO:0043523)	83	0.018005	UP
Cysltr1	1.46226	1.30767e-13	2.59467e-12	UP		regulation of transforming growth factor beta2 production (GO:0032909)	6	0.018021	UP
Ccl11	-2.12489	1.3344e-13	2.6448e-12	DOWN		regulation of cell motility (GO:2000145)	107	0.01809	UP
Pmaip1	1.55935	1.4205e-13	2.81234e-12	UP		positive regulation of mitochondrial translation (GO:0070131)	9	0.018165	DOWN
Plcg2	0.662517	1.42781e-13	2.82359e-12	UP		endocrine system development (GO:0035270)	25	0.018304	UP
Oma1	-0.605023	1.42933e-13	2.82359e-12	DOWN		positive regulation of hormone secretion (GO:0046887)	15	0.018352	UP
Ifitm10	1.39885	1.44642e-13	2.84952e-12	UP		negative regulation of neuron projection development (GO:0010977)	49	0.018535	UP
Itgb5	0.890858	1.447e-13	2.84952e-12	UP		purine ribonucleoside monophosphate metabolic process (GO:0009167)	38	0.018549	DOWN
Acadvl	-0.745283	1.44721e-13	2.84952e-12	DOWN		positive regulation of cell cycle process (GO:0090068)	98	0.018593	UP
Serp1	0.711811	1.45135e-13	2.85454e-12	UP		phospholipid metabolic process (GO:0006644)	66	0.018673	DOWN
Sord	-0.833944	1.45494e-13	2.85559e-12	DOWN		phospholipase C-activating G-protein coupled receptor signaling pathway (GO:0007200)	75	0.018689	UP
Gm13889	1.14758	1.45544e-13	2.85559e-12	UP		regulation of granulocyte differentiation (GO:0030852)	10	0.018699	UP
Maob	-0.86126	1.45666e-13	2.85559e-12	DOWN		myoblast differentiation (GO:0045445)	16	0.018718	UP
Pank1	-0.824015	1.49608e-13	2.92717e-12	DOWN		regulation of DNA damage response, signal transduction by p53 class mediator (GO:0043516)	25	0.018718	UP
Cxcr6	2.77785	1.49643e-13	2.92717e-12	UP		regulation of natural killer cell chemotaxis (GO:2000501)	7	0.01876	UP
Fgd3	1.1243	1.60785e-13	3.1417e-12	UP		positive regulation of transcription factor import into nucleus (GO:0042993)	31	0.018842	UP
Dlgap5	2.14222	1.64592e-13	3.21259e-12	UP		response to organic cyclic compound (GO:0014070)	66	0.018884	UP
Hmmr	1.36188	1.65289e-13	3.22268e-12	UP		urogenital system development (GO:0001655)	20	0.018884	UP
Tuba4a	-0.950762	1.72757e-13	3.36463e-12	DOWN		cyclic purine nucleotide metabolic process (GO:0052652)	26	0.018884	UP
Prkaca	-0.415565	1.76337e-13	3.42852e-12	DOWN		protein import into peroxisome matrix (GO:0016558)	12	0.019037	DOWN
Pbp2	4.67016	1.76419e-13	3.42852e-12	UP		regulation of adaptive immune response (GO:0002819)	14	0.019044	UP
Zfp423	1.04415	1.7726e-13	3.44114e-12	UP		outflow tract septum morphogenesis (GO:0003148)	22	0.019044	UP
Lmod3	-0.62634	1.79843e-13	3.48752e-12	DOWN		regulation of protein kinase B signaling (GO:0051896)	153	0.019107	UP
Chpf	1.07173	1.80318e-13	3.49296e-12	UP		positive regulation of adherens junction organization (GO:1903393)	19	0.019123	UP
Dhrs4	-0.684061	1.82836e-13	3.53791e-12	DOWN		positive regulation of peptidyl-threonine phosphorylation (GO:0010800)	22	0.019405	UP
Svip	-0.666006	1.83327e-13	3.5436e-12	DOWN		superoxide metabolic process (GO:0006801)	25	0.019487	UP
Cmbl	-0.709816	1.86644e-13	3.60383e-12	DOWN		negative regulation of neuron differentiation (GO:0045665)	62	0.019576	UP
Ephx2	-0.661061	1.88302e-13	3.63194e-12	DOWN		L-methionine salvage (GO:0071267)	7	0.019681	DOWN
Farp1	0.877232	1.91507e-13	3.68981e-12	UP		cellular response to hypoxia (GO:0071456)	127	0.019706	DOWN
Arfgap3	0.884755	1.91967e-13	3.6947e-12	UP		regulation of Ras protein signal transduction (GO:0046578)	84	0.019855	UP
Cd302	0.917815	1.97784e-13	3.80257e-12	UP		cytoskeleton-dependent intracellular transport (GO:0030705)	25	0.020123	UP
Gnpat	-0.488568	2.05701e-13	3.95056e-12	DOWN		oligosaccharide biosynthetic process (GO:0009312)	30	0.020123	UP
Bckdk	-0.513725	2.10699e-13	4.04222e-12	DOWN		carboxylic acid catabolic process (GO:0046395)	27	0.020208	UP
Atp5a1	-0.632742	2.16131e-13	4.13631e-12	DOWN		negative regulation of cytokine-mediated signaling pathway (GO:0001960)	33	0.020464	UP
Zfp729a	0.969399	2.16273e-13	4.13631e-12	UP		regulation of extent of cell growth (GO:0061387)	6	0.020466	UP
Rhot2	-0.849601	2.16294e-13	4.13631e-12	DOWN		mesodermal cell differentiation (GO:0048333)	9	0.020466	UP
Slfn4	2.05786	2.28827e-13	4.37133e-12	UP		positive regulation of protein depolymerization (GO:1901881)	12	0.020495	UP
Apoe	1.00213	2.33458e-13	4.45505e-12	UP		regulation of JAK-STAT cascade (GO:0046425)	58	0.020497	UP
Pnmal2	-0.640803	2.33891e-13	4.45858e-12	DOWN		negative regulation of interleukin-17 production (GO:0032700)	8	0.02051	UP
Synpo2l	1.29616	2.4256e-13	4.61894e-12	UP		negative regulation of sequence-specific DNA binding transcription factor activity (GO:0043433)	127	0.020536	UP
Inhba	1.67565	2.43171e-13	4.62566e-12	UP		spliceosomal tri-snRNP complex assembly (GO:0000244)	12	0.020605	DOWN
Dlat	-0.494504	2.59932e-13	4.93926e-12	DOWN		positive regulation of neurogenesis (GO:0050769)	63	0.020606	UP
Mpped2	-0.672713	2.60581e-13	4.94635e-12	DOWN		regulation of low-density lipoprotein particle receptor biosynthetic process (GO:0045714)	7	0.020878	UP
Tmem56	-1.02548	2.63159e-13	4.99002e-12	DOWN		positive regulation of protein autophosphorylation (GO:0031954)	20	0.021076	UP
Hck	1.37011	2.64948e-13	5.01864e-12	UP		positive regulation of phospholipase C activity (GO:0010863)	29	0.021184	UP
Ctdspl	0.923284	2.65347e-13	5.02089e-12	UP		regulation of podosome assembly (GO:0071801)	10	0.021184	UP
Nmt2	0.783792	2.71164e-13	5.12558e-12	UP		regulation of cell aging (GO:0090342)	12	0.021513	UP
Npdc1	1.08688	2.73447e-13	5.16329e-12	UP		regulation of activated T cell proliferation (GO:0046006)	24	0.022011	UP
Dcbld2	0.560604	2.83284e-13	5.34342e-12	UP		regulation of mononuclear cell migration (GO:0071675)	12	0.022094	UP
Camk2a	-0.870664	2.86222e-13	5.39317e-12	DOWN		plasma membrane bounded cell projection morphogenesis (GO:0120039)	50	0.022283	UP
Fhad1	2.6341	2.91969e-13	5.4957e-12	UP		positive regulation of stress-activated protein kinase signaling cascade (GO:0070304)	14	0.022412	UP
Fat1	1.20734	2.93647e-13	5.5215e-12	UP		Wnt signaling pathway (GO:0016055)	105	0.022439	UP
Nipsnap3b	0.760674	3.03745e-13	5.70538e-12	UP		negative regulation of transcription factor import into nucleus (GO:0042992)	21	0.022439	UP
Nid1	0.707755	3.05949e-13	5.74078e-12	UP		response to interferon-gamma (GO:0034341)	54	0.022439	UP
Arhgef25	0.871909	3.12309e-13	5.854e-12	UP		cardiac epithelial to mesenchymal transition (GO:0060317)	16	0.022587	UP
Ephb6	1.58009	3.23022e-13	6.04849e-12	UP		oxygen homeostasis (GO:0032364)	6	0.022649	DOWN
Anxa3	0.918971	3.29048e-13	6.15491e-12	UP		actin crosslink formation (GO:0051764)	9	0.022826	UP
Mical2	0.636165	3.29878e-13	6.16401e-12	UP		regulation of lymphocyte migration (GO:2000401)	7	0.022826	UP
Hp	5.23714	3.32401e-13	6.2047e-12	UP		regulation of macrophage differentiation (GO:0045649)	13	0.022826	UP
Cryba4	-1.21414	3.32864e-13	6.20689e-12	DOWN		positive regulation of binding (GO:0051099)	78	0.022826	UP
Il1rl2	1.05142	3.3321e-13	6.20689e-12	UP		metanephric mesenchyme development (GO:0072075)	11	0.022826	UP
Fmn1	1.16472	3.35791e-13	6.2485e-12	UP		negative regulation of cell-substrate adhesion (GO:0010812)	34	0.022841	UP
Cd300a	1.10391	3.3895e-13	6.30074e-12	UP		negative regulation of cell projection organization (GO:0031345)	40	0.022874	UP
Acsm5	-1.82961	3.41738e-13	6.34601e-12	DOWN		membrane depolarization during cardiac muscle cell action potential (GO:0086012)	17	0.022902	DOWN
Mgme1	-0.577113	3.46588e-13	6.42411e-12	DOWN		receptor metabolic process (GO:0043112)	53	0.022928	UP
Slc46a3	-0.989044	3.46659e-13	6.42411e-12	DOWN		cellular response to prostaglandin stimulus (GO:0071379)	9	0.022928	UP
Abcc9	-0.984978	3.47494e-13	6.43294e-12	DOWN		pulmonary valve morphogenesis (GO:0003184)	12	0.022937	UP
Clec4a2	1.13073	3.55942e-13	6.58255e-12	UP		cellular response to purine-containing compound (GO:0071415)	8	0.023061	DOWN
Gdf15	3.5113	3.60846e-13	6.66637e-12	UP		modification-dependent protein catabolic process (GO:0019941)	137	0.023197	DOWN
A530016L24Rik	-1.40717	3.70961e-13	6.8462e-12	DOWN		positive regulation of cell-matrix adhesion (GO:0001954)	32	0.023394	UP
Slc25a3	-0.605077	3.7618e-13	6.93539e-12	DOWN		negative regulation of viral genome replication (GO:0045071)	38	0.023828	UP
Atg10	-0.618431	3.87167e-13	7.13063e-12	DOWN		regulation of NLRP3 inflammasome complex assembly (GO:1900225)	9	0.023979	UP
Mylk4	-1.36944	4.03886e-13	7.43092e-12	DOWN		negative regulation of cell-matrix adhesion (GO:0001953)	27	0.024009	UP
Cyth3	0.69556	4.04493e-13	7.43447e-12	UP		leukocyte aggregation (GO:0070486)	7	0.024217	UP
Trps1	0.845255	4.1173e-13	7.55975e-12	UP		oxaloacetate metabolic process (GO:0006107)	7	0.024402	DOWN
Fzd2	1.85565	4.33108e-13	7.94414e-12	UP		positive regulation of wound healing (GO:0090303)	25	0.024574	UP
Itga2	1.65563	4.33922e-13	7.95095e-12	UP		branching involved in blood vessel morphogenesis (GO:0001569)	14	0.024676	UP
Adamtsl1	2.83052	4.4984e-13	8.23422e-12	UP		regulation of protein import into nucleus (GO:0042306)	24	0.024925	UP
Lyrm9	-0.698554	4.56432e-13	8.34638e-12	DOWN		immunological synapse formation (GO:0001771)	5	0.025039	UP
Prkcd	0.8586	4.63926e-13	8.4664e-12	UP		zinc II ion transmembrane transport (GO:0071577)	22	0.025039	UP
Cks2	1.9881	4.63938e-13	8.4664e-12	UP		positive regulation of pri-miRNA transcription from RNA polymerase II promoter (GO:1902895)	18	0.025308	UP
Eci2	-0.587516	4.65115e-13	8.47926e-12	DOWN		lysosomal transport (GO:0007041)	69	0.025678	DOWN
Mettl15	-0.591091	4.66074e-13	8.48813e-12	DOWN		regulation of secretion by cell (GO:1903530)	50	0.025711	UP
B4gat1	-0.450585	4.77339e-13	8.68447e-12	DOWN		histone H4 acetylation (GO:0043967)	46	0.025902	DOWN
Amacr	-0.621895	4.81332e-13	8.74826e-12	DOWN		regulation of tumor necrosis factor biosynthetic process (GO:0042534)	9	0.026048	UP
1810055G02Rik	0.813567	4.91315e-13	8.92068e-12	UP		sensory perception of sound (GO:0007605)	75	0.026282	UP
mt-Nd5	-0.677031	4.93229e-13	8.94637e-12	DOWN		rRNA metabolic process (GO:0016072)	195	0.026377	DOWN
Chchd7	-0.523882	5.11437e-13	9.26728e-12	DOWN		negative regulation of neuron apoptotic process (GO:0043524)	59	0.026382	UP
Fgf13	-0.711374	5.14037e-13	9.30501e-12	DOWN		protein localization to microtubule cytoskeleton (GO:0072698)	8	0.026463	UP
Mdh1	-0.591858	5.19528e-13	9.39493e-12	DOWN		negative regulation of protein metabolic process (GO:0051248)	39	0.026463	UP
mt-Nd3	-0.519521	5.20858e-13	9.4095e-12	DOWN		ERK1 and ERK2 cascade (GO:0070371)	20	0.026493	UP
Scd4	1.69577	5.23446e-13	9.44676e-12	UP		regulation of microglial cell activation (GO:1903978)	6	0.026493	UP
Cd84	1.34303	5.27023e-13	9.50176e-12	UP		podosome assembly (GO:0071800)	7	0.026864	UP
Slc40a1	-0.836611	5.38876e-13	9.70572e-12	DOWN		calcium-mediated signaling (GO:0019722)	60	0.026908	UP
Kcnn4	2.11304	5.67865e-13	1.02176e-11	UP		mitochondrial fusion (GO:0008053)	15	0.027262	DOWN
Dcun1d2	-0.647512	5.73829e-13	1.03122e-11	DOWN		glycine metabolic process (GO:0006544)	10	0.027262	DOWN
Acot2	-0.875558	5.74274e-13	1.03122e-11	DOWN		positive regulation of T cell migration (GO:2000406)	16	0.027314	UP
Stx11	1.02517	5.78819e-13	1.03835e-11	UP		regulation of cardiac muscle cell action potential (GO:0098901)	24	0.028125	DOWN
Efnb3	-1.11472	6.0809e-13	1.08977e-11	DOWN		negative regulation of small GTPase mediated signal transduction (GO:0051058)	26	0.028242	UP
Pkd2	0.770438	6.18914e-13	1.10806e-11	UP		regulation of mitotic spindle organization (GO:0060236)	35	0.028242	UP
Trmt2b	-0.509514	6.20793e-13	1.11032e-11	DOWN		regulation of DNA binding (GO:0051101)	48	0.02828	UP
Ogdh	-0.573329	6.34204e-13	1.13317e-11	DOWN		lung development (GO:0030324)	28	0.028692	UP
Pdlim2	1.48178	6.43995e-13	1.14952e-11	UP		negative regulation of lipid metabolic process (GO:0045833)	17	0.028815	UP
Cutc	-0.792907	6.47726e-13	1.15504e-11	DOWN		regulation of lymphocyte proliferation (GO:0050670)	13	0.029036	UP
Adgrg2	1.308	6.48981e-13	1.15613e-11	UP		phosphatidylinositol-mediated signaling (GO:0048015)	54	0.029063	UP
Slc26a6	-0.904291	6.59271e-13	1.17329e-11	DOWN		positive regulation of T-helper 1 type immune response (GO:0002827)	12	0.029094	UP
Fitm1	-0.856283	6.75255e-13	1.19976e-11	DOWN		tooth mineralization (GO:0034505)	6	0.029226	UP
Tspan6	1.05559	6.75477e-13	1.19976e-11	UP		positive regulation of type 2 immune response (GO:0002830)	10	0.030003	UP
Pgm1	-0.385424	6.895e-13	1.22345e-11	DOWN		fructose 6-phosphate metabolic process (GO:0006002)	6	0.03035	DOWN
Clu	1.14521	6.94992e-13	1.23198e-11	UP		cellular response to interleukin-6 (GO:0071354)	22	0.030355	UP
Lat2	1.53679	6.96706e-13	1.2338e-11	UP		regulation of glial cell apoptotic process (GO:0034350)	6	0.030359	UP
Pcsk5	1.15242	7.28372e-13	1.28861e-11	UP		negative regulation of amyloid-beta formation (GO:1902430)	9	0.030891	UP
Mcm6	0.772476	7.56728e-13	1.33746e-11	UP		necroptotic process (GO:0070266)	13	0.031109	UP
Mst1r	1.44821	7.67919e-13	1.3559e-11	UP		sulfur compound biosynthetic process (GO:0044272)	113	0.031248	UP
Msr1	1.04105	7.68939e-13	1.35637e-11	UP		actin filament network formation (GO:0051639)	8	0.031301	UP
Acsl6	-0.973299	7.9842e-13	1.40699e-11	DOWN		positive regulation of secretion by cell (GO:1903532)	50	0.031377	UP
Tcap	-0.662655	8.32147e-13	1.46499e-11	DOWN		regulation of integrin activation (GO:0033623)	9	0.031574	UP
Trap1	-0.475736	8.5773e-13	1.50781e-11	DOWN		negative regulation of MAPK cascade (GO:0043409)	76	0.031574	UP
Retsat	-0.87972	8.58149e-13	1.50781e-11	DOWN		glycosphingolipid metabolic process (GO:0006687)	47	0.031771	UP
Mfsd4b3-ps	-1.05229	8.63322e-13	1.51541e-11	DOWN		histone acetylation (GO:0016573)	69	0.031793	DOWN
Mfn2	-0.497712	8.69636e-13	1.525e-11	DOWN		heart process (GO:0003015)	11	0.031793	DOWN
Stom	-0.551386	8.77899e-13	1.53799e-11	DOWN		negative regulation of membrane protein ectodomain proteolysis (GO:0051045)	7	0.031796	UP
Rab12	-0.554976	8.81255e-13	1.54237e-11	DOWN		negative regulation of toll-like receptor 4 signaling pathway (GO:0034144)	7	0.031796	UP
Lsm14b	-0.533981	8.8221e-13	1.54254e-11	DOWN		regulation of filopodium assembly (GO:0051489)	33	0.031983	UP
Hvcn1	1.59937	9.02852e-13	1.57709e-11	UP		negative regulation of cell-cell adhesion (GO:0022408)	29	0.031983	UP
Ddt	-0.777477	9.33386e-13	1.62885e-11	DOWN		regulation of translation (GO:0006417)	203	0.032144	DOWN
Slc5a3	1.0507	9.58059e-13	1.67028e-11	UP		proton transport (GO:0015992)	28	0.032255	DOWN
Adhfe1	-1.13823	9.72092e-13	1.6931e-11	DOWN		negative regulation of G2/M transition of mitotic cell cycle (GO:0010972)	61	0.032255	DOWN
Hsd11b1	-1.29217	9.7863e-13	1.70284e-11	DOWN		mRNA metabolic process (GO:0016071)	89	0.032255	DOWN
Psme1	-0.58389	9.89164e-13	1.7195e-11	DOWN		protein-cofactor linkage (GO:0018065)	10	0.03232	DOWN
Cs	-0.59504	1.00221e-12	1.74049e-11	DOWN		T-helper 1 type immune response (GO:0042088)	7	0.032416	UP
Neurl2	-0.634714	1.01109e-12	1.75422e-11	DOWN		positive regulation of focal adhesion assembly (GO:0051894)	17	0.032459	UP
Taz	-0.499516	1.04325e-12	1.80827e-11	DOWN		embryonic skeletal joint development (GO:0072498)	6	0.032541	UP
Sdk1	0.824529	1.05278e-12	1.82302e-11	UP		regulation of receptor-mediated endocytosis (GO:0048259)	34	0.03268	UP
Cpt1b	-0.531352	1.06295e-12	1.83887e-11	DOWN		cAMP-mediated signaling (GO:0019933)	71	0.03268	UP
Cpne8	0.820696	1.15783e-12	2.00108e-11	UP		regulation of interferon-gamma biosynthetic process (GO:0045072)	13	0.032711	UP
Bub1b	1.35566	1.1634e-12	2.00876e-11	UP		axon guidance (GO:0007411)	155	0.032925	UP
Kcne4	1.10107	1.16906e-12	2.0166e-11	UP		neural crest cell migration (GO:0001755)	28	0.0333	UP
Il10ra	1.09834	1.17487e-12	2.02468e-11	UP		positive regulation of T cell differentiation (GO:0045582)	28	0.033436	UP
Car9	1.53635	1.18506e-12	2.04028e-11	UP		regulation of anatomical structure morphogenesis (GO:0022603)	78	0.033436	UP
Atp5f1	-0.664927	1.18963e-12	2.04619e-11	DOWN		regulation of protein targeting (GO:1903533)	6	0.033757	DOWN
Sdr39u1	-0.664796	1.2009e-12	2.06359e-11	DOWN		cardiac muscle cell action potential (GO:0086001)	29	0.033757	DOWN
Lias	-0.379771	1.2053e-12	2.06918e-11	DOWN		regulation of smoothened signaling pathway (GO:0008589)	34	0.033821	UP
Gpsm2	1.32804	1.22386e-12	2.09903e-11	UP		dendritic spine morphogenesis (GO:0060997)	15	0.033821	UP
Trim30a	0.595719	1.23442e-12	2.11513e-11	UP		negative regulation of activin receptor signaling pathway (GO:0032926)	8	0.033965	UP
Cyp4f18	1.28942	1.23801e-12	2.11925e-11	UP		dendrite morphogenesis (GO:0048813)	30	0.034089	UP
Arpc1b	0.840921	1.24957e-12	2.137e-11	UP		negative regulation of platelet-derived growth factor receptor signaling pathway (GO:0010642)	15	0.034614	UP
Grem2	7.75304	1.28868e-12	2.20178e-11	UP		regulation of endothelial cell migration (GO:0010594)	68	0.034775	UP
C1ra	0.821313	1.28993e-12	2.20183e-11	UP		epithelium development (GO:0060429)	107	0.035315	UP
Steap2	1.48692	1.41963e-12	2.42092e-11	UP		atrioventricular valve morphogenesis (GO:0003181)	15	0.035339	UP
Tgfbr2	0.583097	1.46554e-12	2.49684e-11	UP		cellular lipid biosynthetic process (GO:0097384)	7	0.03544	DOWN
Shc1	0.431162	1.47801e-12	2.5157e-11	UP		cellular response to low-density lipoprotein particle stimulus (GO:0071404)	13	0.035699	UP
Srpx	1.1509	1.51091e-12	2.56927e-11	UP		positive regulation of T cell differentiation in thymus (GO:0033089)	6	0.035842	UP
Ubtd2	0.845815	1.52834e-12	2.59644e-11	UP		septin ring assembly (GO:0000921)	1	0.03586	UP
Rhbdf1	0.649213	1.5325e-12	2.59879e-11	UP		negative regulation of cyclin-dependent protein serine/threonine kinase activity involved in G1/S transition of mitotic cell cycle (GO:0031658)	7	0.036279	UP
Lrrn2	1.09129	1.53262e-12	2.59879e-11	UP		regulation of tumor necrosis factor-mediated signaling pathway (GO:0010803)	50	0.036515	UP
Lsp1	0.812446	1.57454e-12	2.66736e-11	UP		ureteric bud morphogenesis (GO:0060675)	19	0.036925	UP
Itgb2	1.40733	1.6039e-12	2.71453e-11	UP		mitotic nuclear division (GO:0140014)	70	0.037198	UP
Ccdc68	1.21305	1.61298e-12	2.72733e-11	UP		positive regulation of interleukin-6 secretion (GO:2000778)	16	0.037198	UP
Snx7	0.740009	1.6193e-12	2.73545e-11	UP		regulation of mast cell activation (GO:0033003)	9	0.037198	UP
Kif4	1.76342	1.66286e-12	2.80639e-11	UP		ruffle organization (GO:0031529)	15	0.037198	UP
Tceal9	0.749101	1.68514e-12	2.84132e-11	UP		negative regulation of amyloid precursor protein catabolic process (GO:1902992)	11	0.037281	UP
Sp140	1.03519	1.6956e-12	2.85628e-11	UP		regulation of immunoglobulin production (GO:0002637)	8	0.037367	UP
Them6	-0.71847	1.70365e-12	2.86715e-11	DOWN		regulation of pri-miRNA transcription from RNA polymerase II promoter (GO:1902893)	24	0.037367	UP
Pcmtd1	-0.433096	1.73605e-12	2.91894e-11	DOWN		regulation of NIK/NF-kappaB signaling (GO:1901222)	28	0.037367	UP
Rgs19	0.869938	1.76172e-12	2.95933e-11	UP		membrane lipid biosynthetic process (GO:0046467)	57	0.037453	UP
Pira2	1.66519	1.81146e-12	3.04003e-11	UP		positive regulation of epithelial cell apoptotic process (GO:1904037)	13	0.037658	UP
Evc	0.761759	1.85345e-12	3.10761e-11	UP		regulation of cell growth (GO:0001558)	189	0.037735	UP
Nxpe5	1.73812	1.86048e-12	3.11648e-11	UP		chylomicron remnant clearance (GO:0034382)	7	0.037834	UP
Map1a	1.30202	1.87184e-12	3.13259e-11	UP		positive regulation of protein localization to plasma membrane (GO:1903078)	42	0.037938	UP
Myo1g	1.25591	1.93123e-12	3.22896e-11	UP		protein lipoylation (GO:0009249)	8	0.038086	DOWN
Foxc2	1.31268	1.95291e-12	3.26218e-11	UP		negative regulation of cell adhesion mediated by integrin (GO:0033629)	7	0.038115	UP
Gart	-0.434699	1.99646e-12	3.33183e-11	DOWN		positive regulation of filopodium assembly (GO:0051491)	23	0.038115	UP
Numbl	1.12889	2.00335e-12	3.34022e-11	UP		regulation of vitamin D biosynthetic process (GO:0060556)	7	0.038141	UP
Rbp4	3.26016	2.01113e-12	3.35008e-11	UP		T cell chemotaxis (GO:0010818)	8	0.038227	UP
Grcc10	-0.665261	2.0363e-12	3.38887e-11	DOWN		positive regulation of microglial cell activation (GO:1903980)	5	0.038527	UP
Bok	1.28434	2.06727e-12	3.43722e-11	UP		negative regulation of blood coagulation (GO:0030195)	35	0.039227	UP
Stac2	2.27712	2.0998e-12	3.48808e-11	UP		response to interferon-alpha (GO:0035455)	15	0.039298	UP
Serpinb2	5.76886	2.1127e-12	3.50626e-11	UP		regulation of monooxygenase activity (GO:0032768)	23	0.039459	UP
Gask1b	1.52986	2.22802e-12	3.69424e-11	UP		negative regulation of cytokine production involved in inflammatory response (GO:1900016)	8	0.039459	UP
Chpf2	0.906711	2.24383e-12	3.71702e-11	UP		regulation of viral entry into host cell (GO:0046596)	22	0.039468	UP
Gcgr	2.51962	2.26214e-12	3.7439e-11	UP		immune response-activating cell surface receptor signaling pathway (GO:0002429)	14	0.039468	UP
Sertad4	1.85589	2.30205e-12	3.80514e-11	UP		icosanoid metabolic process (GO:0006690)	33	0.039659	UP
Mreg	-0.790604	2.30338e-12	3.80514e-11	DOWN		regulation of cyclin-dependent protein serine/threonine kinase activity involved in G1/S transition of mitotic cell cycle (GO:0031657)	14	0.039659	UP
Spag5	2.07404	2.36801e-12	3.9083e-11	UP		DNA repair (GO:0006281)	272	0.04021	DOWN
Gask1a	1.92675	2.39849e-12	3.95498e-11	UP		regulation of mesenchymal cell proliferation (GO:0010464)	12	0.040271	UP
Sucla2	-0.650861	2.42329e-12	3.9922e-11	DOWN		positive regulation of kidney development (GO:0090184)	6	0.041326	UP
Chad	2.2919	2.50856e-12	4.12889e-11	UP		carbohydrate biosynthetic process (GO:0016051)	33	0.04133	UP
Cd300lb	1.97518	2.53435e-12	4.16752e-11	UP		positive regulation of endothelial cell migration (GO:0010595)	69	0.041431	UP
Il4ra	1.17079	2.53673e-12	4.16762e-11	UP		positive regulation of alpha-beta T cell differentiation (GO:0046638)	8	0.041431	UP
Vdac1	-0.552754	2.55584e-12	4.19518e-11	DOWN		aorta development (GO:0035904)	8	0.041431	UP
Kif20b	1.5118	2.66315e-12	4.36732e-11	UP		regulation of DNA biosynthetic process (GO:2000278)	21	0.041431	UP
Il6	4.74064	2.68096e-12	4.39252e-11	UP		protein trimerization (GO:0070206)	27	0.041609	UP
Mfsd8	-0.459635	2.69755e-12	4.41568e-11	DOWN		regulation of neuron differentiation (GO:0045664)	78	0.041609	UP
Vav1	1.23782	2.74406e-12	4.48771e-11	UP		glycogen metabolic process (GO:0005977)	31	0.041866	DOWN
Cenpt	0.905643	2.75962e-12	4.50905e-11	UP		glycine transport (GO:0015816)	8	0.041866	DOWN
Prdx3	-0.585493	2.77977e-12	4.53784e-11	DOWN		positive regulation of cytokine-mediated signaling pathway (GO:0001961)	32	0.042072	UP
Cenpe	1.85133	2.89293e-12	4.71828e-11	UP		regulation of protein localization to plasma membrane (GO:1903076)	63	0.042226	UP
Pcdhb13	1.49497	2.91701e-12	4.75324e-11	UP		digestive tract development (GO:0048565)	41	0.042409	UP
Tnfrsf1b	1.24127	3.00216e-12	4.88756e-11	UP		positive regulation of monooxygenase activity (GO:0032770)	21	0.042409	UP
Mtpn	0.508649	3.01843e-12	4.90959e-11	UP		regulation of cell-cell adhesion mediated by integrin (GO:0033632)	7	0.042458	UP
Mrps31	-0.609427	3.08288e-12	5.00988e-11	DOWN		regulation of TOR signaling (GO:0032006)	66	0.042476	DOWN
Acot1	-1.75375	3.08966e-12	5.01529e-11	DOWN		positive regulation of interferon-gamma biosynthetic process (GO:0045078)	11	0.042785	UP
Amz2	-0.467769	3.09179e-12	5.01529e-11	DOWN		toll-like receptor 3 signaling pathway (GO:0034138)	9	0.042798	UP
Rtkn	0.839754	3.10072e-12	5.02523e-11	UP		regulation of vasculature development (GO:1901342)	27	0.042798	UP
Crip1	0.90673	3.11304e-12	5.04065e-11	UP		tRNA methylation (GO:0030488)	23	0.043121	DOWN
Gpn3	-0.544088	3.15898e-12	5.11043e-11	DOWN		AV node cell action potential (GO:0086016)	7	0.043121	DOWN
Prkag2	0.54076	3.20343e-12	5.17768e-11	UP		positive regulation of Notch signaling pathway (GO:0045747)	31	0.043201	UP
Adra2a	4.03251	3.22519e-12	5.20816e-11	UP		regulation of cell division (GO:0051302)	63	0.043201	UP
Myzap	-0.556632	3.25327e-12	5.24879e-11	DOWN		osteoblast development (GO:0002076)	8	0.043211	UP
Racgap1	1.51673	3.26577e-12	5.26422e-11	UP		negative regulation of T-helper cell differentiation (GO:0045623)	8	0.043211	UP
Tagln	0.919652	3.34408e-12	5.38562e-11	UP		negative regulation of embryonic development (GO:0045992)	10	0.043211	UP
0610040J01Rik	-1.00006	3.37729e-12	5.43423e-11	DOWN		camera-type eye development (GO:0043010)	23	0.043211	UP
Gm20594	-1.10617	3.41452e-12	5.4889e-11	DOWN		negative regulation of wound healing (GO:0061045)	24	0.043211	UP
Ccn3	0.86687	3.41738e-12	5.4889e-11	UP		positive regulation of small GTPase mediated signal transduction (GO:0051057)	15	0.043211	UP
Sulf2	0.801212	3.48827e-12	5.59341e-11	UP		ribosome assembly (GO:0042255)	50	0.043303	DOWN
Crabp2	4.09984	3.48868e-12	5.59341e-11	UP		phosphate-containing compound metabolic process (GO:0006796)	174	0.043303	DOWN
Fam171a2	1.2144	3.50445e-12	5.61368e-11	UP		regulation of cardiac muscle contraction (GO:0055117)	35	0.043303	DOWN
Pls3	0.676045	3.59525e-12	5.754e-11	UP		negative regulation of T cell receptor signaling pathway (GO:0050860)	12	0.043381	UP
Kif20a	1.24756	3.65057e-12	5.83734e-11	UP		regulation of amyloid precursor protein biosynthetic process (GO:0042984)	9	0.043451	UP
Rab15	1.95506	3.7376e-12	5.96808e-11	UP		cellular response to oxygen-containing compound (GO:1901701)	248	0.043451	UP
Coq9	-0.767008	3.73898e-12	5.96808e-11	DOWN		regulation of hair cycle (GO:0042634)	9	0.043626	UP
Fbln7	2.15945	3.74619e-12	5.97428e-11	UP		positive regulation of interleukin-12 production (GO:0032735)	24	0.043799	UP
Galnt10	0.674163	3.75974e-12	5.99057e-11	UP		regulation of macrophage activation (GO:0043030)	21	0.043843	UP
Sf3b2	-0.310867	3.77034e-12	6.00213e-11	DOWN		positive regulation of mitochondrial fission (GO:0090141)	13	0.043875	DOWN
Ulbp1	0.955861	3.80546e-12	6.05267e-11	UP		amino acid transmembrane transport (GO:0003333)	27	0.04394	UP
Wfdc17	1.01819	3.81948e-12	6.06959e-11	UP		negative regulation of protein import into nucleus (GO:0042308)	20	0.044063	UP
Tmem158	1.5155	3.99991e-12	6.3507e-11	UP		entry into host cell (GO:0030260)	32	0.04407	UP
Tha1	-0.791836	4.00636e-12	6.35532e-11	DOWN		cell part morphogenesis (GO:0032990)	10	0.044208	DOWN
Fitm2	-0.799703	4.06151e-12	6.43711e-11	DOWN		nucleic acid transport (GO:0050657)	6	0.044236	DOWN
Optn	-0.484916	4.09211e-12	6.4799e-11	DOWN		citrate metabolic process (GO:0006101)	6	0.044236	DOWN
Fam131a	-0.61492	4.09785e-12	6.48327e-11	DOWN		regulation of extracellular matrix organization (GO:1903053)	7	0.044776	UP
Adss	0.633655	4.14662e-12	6.55239e-11	UP		endothelial cell development (GO:0001885)	19	0.044776	UP
Tef	-0.62749	4.14884e-12	6.55239e-11	DOWN		negative regulation of cell aging (GO:0090344)	13	0.044776	UP
Fastk	-0.765939	4.214e-12	6.64946e-11	DOWN		regulation of mitochondrial depolarization (GO:0051900)	9	0.044954	UP
Gnao1	0.734578	4.2392e-12	6.68335e-11	UP		mitochondrial membrane organization (GO:0007006)	17	0.04519	DOWN
Idh3b	-0.719847	4.31163e-12	6.79158e-11	DOWN		embryonic skeletal joint morphogenesis (GO:0060272)	6	0.04566	UP
Clic5	0.506581	4.33094e-12	6.81601e-11	UP		negative regulation of leukocyte mediated cytotoxicity (GO:0001911)	6	0.04566	UP
Tns3	0.904103	4.50133e-12	7.07797e-11	UP		regulation of MyD88-independent toll-like receptor signaling pathway (GO:0034127)	8	0.045667	UP
Iqgap1	0.799446	4.5363e-12	7.12672e-11	UP		RNA methylation (GO:0001510)	44	0.046009	DOWN
Bex1	-1.11466	4.55682e-12	7.1527e-11	DOWN		transcription, DNA-templated (GO:0006351)	325	0.046009	DOWN
Tcaf1	0.581138	4.78173e-12	7.49917e-11	UP		DNA-templated transcription, elongation (GO:0006354)	99	0.046009	DOWN
B230118H07Rik	-0.59487	4.80894e-12	7.53526e-11	DOWN		regulation of granulocyte macrophage colony-stimulating factor production (GO:0032645)	12	0.04602	UP
Ap3s1	0.963628	4.90941e-12	7.68598e-11	UP		substrate-dependent cell migration (GO:0006929)	14	0.046102	UP
Gpnmb	3.38098	5.01916e-12	7.85096e-11	UP		antigen processing and presentation of exogenous peptide antigen via MHC class II (GO:0019886)	77	0.046239	UP
Spry1	0.61718	5.10667e-12	7.98089e-11	UP		regulation of amyloid fibril formation (GO:1905906)	7	0.046239	UP
Pecr	-0.545649	5.15743e-12	8.05321e-11	DOWN		regulation of cell junction assembly (GO:1901888)	15	0.046239	UP
Procr	1.36436	5.19509e-12	8.10497e-11	UP		antigen processing and presentation of exogenous peptide antigen (GO:0002478)	77	0.046239	UP
Herpud1	-1.13085	5.28338e-12	8.23557e-11	DOWN		antigen processing and presentation of peptide antigen via MHC class II (GO:0002495)	77	0.046239	UP
Dap3	-0.53973	5.30751e-12	8.26599e-11	DOWN		G-protein coupled receptor signaling pathway, coupled to cyclic nucleotide second messenger (GO:0007187)	101	0.046242	UP
Cd68	1.12728	5.357e-12	8.33585e-11	UP		positive regulation of vascular endothelial growth factor receptor signaling pathway (GO:0030949)	12	0.0464	UP
Atp5e	-0.718734	5.43613e-12	8.45165e-11	DOWN		positive regulation of toll-like receptor 4 signaling pathway (GO:0034145)	8	0.0464	UP
Msrb2	-0.697196	5.50415e-12	8.54999e-11	DOWN		epidermal growth factor receptor signaling pathway (GO:0007173)	56	0.046614	UP
Stxbp2	0.915884	5.6488e-12	8.76711e-11	UP		regulation of cellular senescence (GO:2000772)	23	0.046642	UP
Tcp11l2	-0.545471	5.77099e-12	8.94902e-11	DOWN		regulation of kinase activity (GO:0043549)	87	0.04668	UP
Nradd	1.11077	5.80366e-12	8.99192e-11	UP		regulation of calcineurin-NFAT signaling cascade (GO:0070884)	14	0.046787	UP
D1Ertd622e	0.565383	5.82552e-12	9.01801e-11	UP		cell junction assembly (GO:0034329)	55	0.046817	UP
Mapt	-0.465598	5.85167e-12	9.05068e-11	DOWN		microtubule cytoskeleton organization involved in mitosis (GO:1902850)	42	0.046974	UP
Sars2	-0.55229	5.87557e-12	9.07415e-11	DOWN		negative regulation of protein serine/threonine kinase activity (GO:0071901)	66	0.046974	UP
Sdc3	0.527066	5.87695e-12	9.07415e-11	UP		positive regulation of cell-substrate adhesion (GO:0010811)	50	0.046988	UP
Fam91a1	0.475833	6.01774e-12	9.28356e-11	UP		cellular modified amino acid catabolic process (GO:0042219)	12	0.04729	DOWN
Flrt2	1.06857	6.09958e-12	9.40174e-11	UP		negative regulation of anoikis (GO:2000811)	13	0.047363	UP
Myo1c	0.32619	6.28765e-12	9.68331e-11	UP		regulation of sequestering of triglyceride (GO:0010889)	12	0.047384	DOWN
Oaf	1.17757	6.30205e-12	9.69716e-11	UP		regulation of bicellular tight junction assembly (GO:2000810)	16	0.047411	UP
Gsta4	-0.737388	6.3097e-12	9.70063e-11	DOWN		I-kappaB kinase/NF-kappaB signaling (GO:0007249)	55	0.047413	UP
Phyh	-0.592455	6.33616e-12	9.73297e-11	DOWN		negative regulation of morphogenesis of an epithelium (GO:1905331)	11	0.047677	UP
Hjv	-0.769869	6.44741e-12	9.8954e-11	DOWN		negative regulation of innate immune response (GO:0045824)	17	0.047724	UP
Psd4	1.24849	6.46162e-12	9.90874e-11	UP		hexose metabolic process (GO:0019318)	43	0.047735	DOWN
Irx1	-0.894802	6.49911e-12	9.95773e-11	DOWN		secondary alcohol biosynthetic process (GO:1902653)	33	0.047735	DOWN
Tango6	-0.598113	6.58226e-12	1.00765e-10	DOWN		positive regulation of hemostasis (GO:1900048)	9	0.048107	UP
Prodh	-1.29536	6.82939e-12	1.04459e-10	DOWN		positive regulation of coagulation (GO:0050820)	9	0.048107	UP
Auh	-0.688231	6.88746e-12	1.05258e-10	DOWN		positive regulation of non-canonical Wnt signaling pathway (GO:2000052)	8	0.048796	UP
Myorg	-0.639631	6.91384e-12	1.05571e-10	DOWN		regulation of fibroblast apoptotic process (GO:2000269)	6	0.049068	UP
Cplx3	4.40786	6.98547e-12	1.06574e-10	UP		transcription elongation from RNA polymerase II promoter (GO:0006368)	86	0.049453	DOWN
Arrb2	0.861578	7.0338e-12	1.07221e-10	UP		regulation of platelet-derived growth factor receptor signaling pathway (GO:0010640)	10	0.049746	UP
Dus4l	-0.60481	7.04373e-12	1.07281e-10	DOWN		apoptotic process (GO:0006915)	202	0.04975	UP
Arfip1	0.693886	7.11577e-12	1.08286e-10	UP		regulation of lymphocyte differentiation (GO:0045619)	12	0.049902	UP
Mcoln2	2.48427	7.16588e-12	1.08957e-10	UP		mitotic spindle elongation (GO:0000022)	8	0.049902	UP
Ndufs2	-0.663293	7.23766e-12	1.09955e-10	DOWN		negative regulation of growth (GO:0045926)	106	0.04991	UP
Nfs1	-0.568649	7.29676e-12	1.10759e-10	DOWN
Sec61a1	0.538739	7.37242e-12	1.11813e-10	UP
Eid2b	-0.500473	7.40737e-12	1.12248e-10	DOWN
Suclg1	-0.652577	7.61627e-12	1.153e-10	DOWN
B3gnt9	1.30579	7.62743e-12	1.153e-10	UP
Kcnj11	-0.571357	7.62799e-12	1.153e-10	DOWN
Sept11	0.778911	7.65692e-12	1.15639e-10	UP
Gli2	1.33644	7.78876e-12	1.17532e-10	UP
Nfkbid	1.6466	7.80923e-12	1.17742e-10	UP
Sema3f	0.942459	7.86403e-12	1.18468e-10	UP
Hcar2	3.99717	7.9989e-12	1.20399e-10	UP
Zadh2	-0.410099	8.36493e-12	1.25803e-10	DOWN
Myo5a	0.820958	8.3918e-12	1.26102e-10	UP
Zbed5	1.51002	8.69069e-12	1.30484e-10	UP
Ptpn9	0.620608	8.74946e-12	1.31256e-10	UP
Fermt3	0.733177	8.83917e-12	1.32492e-10	UP
Prelid1	0.599474	8.85474e-12	1.32614e-10	UP
Tnfaip8l2	1.18959	8.87949e-12	1.32874e-10	UP
Ppp1r3f	-0.841115	8.93621e-12	1.33612e-10	DOWN
Ms4a4c	1.76664	8.98153e-12	1.34177e-10	UP
Dcn	0.639158	9.86329e-12	1.47228e-10	UP
Apaf1	0.634305	9.90698e-12	1.47757e-10	UP
Abhd18	-0.669801	9.94213e-12	1.48158e-10	DOWN
Sbk2	-1.44575	9.95784e-12	1.48269e-10	DOWN
Det1	-0.609566	1.02384e-11	1.5232e-10	DOWN
Trim47	0.964056	1.02686e-11	1.52643e-10	UP
Homer3	0.920563	1.03518e-11	1.53753e-10	UP
Smarcd1	-0.556412	1.03734e-11	1.53946e-10	DOWN
Ptpn7	1.06098	1.0434e-11	1.54717e-10	UP
Cth	-1.7991	1.05589e-11	1.56441e-10	DOWN
Cdc20	1.431	1.08376e-11	1.60438e-10	UP
Kyat1	-0.534019	1.10848e-11	1.63962e-10	DOWN
Ccn1	1.09842	1.13552e-11	1.67823e-10	UP
Fcrls	1.32208	1.13687e-11	1.67884e-10	UP
Tpx2	1.67735	1.1581e-11	1.70879e-10	UP
Slc2a10	1.08685	1.18571e-11	1.7481e-10	UP
Oxsm	-0.665242	1.21759e-11	1.79363e-10	DOWN
Dpy19l1	0.654322	1.21942e-11	1.79484e-10	UP
Plxnb1	-1.15608	1.23376e-11	1.81447e-10	DOWN
Cnot10	-0.373875	1.23583e-11	1.81602e-10	DOWN
Tmem201	-0.600976	1.2431e-11	1.82521e-10	DOWN
Vcam1	0.70034	1.26502e-11	1.85588e-10	UP
Ms4a14	1.84024	1.26694e-11	1.85717e-10	UP
Itga5	0.814919	1.27149e-11	1.86234e-10	UP
Slc7a7	0.779381	1.29233e-11	1.8913e-10	UP
Tyms	0.778314	1.31555e-11	1.92372e-10	UP
Fn3k	-0.713647	1.32342e-11	1.93365e-10	DOWN
Sfrp5	-1.60486	1.34208e-11	1.95933e-10	DOWN
Vill	1.74101	1.34674e-11	1.96453e-10	UP
Adgrd1	0.996449	1.34864e-11	1.96571e-10	UP
Xylt1	0.908817	1.36068e-11	1.98165e-10	UP
Bzw2	-0.566068	1.40454e-11	2.04387e-10	DOWN
Il18rap	2.34152	1.40929e-11	2.04912e-10	UP
Tmem38a	-0.585908	1.44916e-11	2.10539e-10	DOWN
Mgst3	-0.674607	1.52854e-11	2.21891e-10	DOWN
Pcdhb22	0.748813	1.55235e-11	2.25166e-10	UP
Gabre	1.33962	1.56493e-11	2.26807e-10	UP
Sh3bgrl3	0.868233	1.57382e-11	2.27912e-10	UP
mt-Nd2	-0.68909	1.61e-11	2.32964e-10	DOWN
Emp3	0.999576	1.63068e-11	2.35766e-10	UP
Gatd3a	-0.680116	1.65204e-11	2.38662e-10	DOWN
Pwwp3b	1.33974	1.65829e-11	2.39373e-10	UP
Slc39a6	0.897056	1.69441e-11	2.4439e-10	UP
Samsn1	1.64883	1.70482e-11	2.45693e-10	UP
Lrp1	0.9806	1.75088e-11	2.52129e-10	UP
Coq2	-0.605945	1.75395e-11	2.52369e-10	DOWN
Bin1	0.67511	1.76723e-11	2.54077e-10	UP
Rpl3	0.793426	1.78528e-11	2.56467e-10	UP
Qsox1	0.674744	1.79883e-11	2.58205e-10	UP
Syt7	-0.837843	1.8123e-11	2.59931e-10	DOWN
Dzip1	0.927178	1.83128e-11	2.62445e-10	UP
Aldh5a1	-0.803297	1.83297e-11	2.62477e-10	DOWN
Slc25a26	-0.653732	1.84439e-11	2.63901e-10	DOWN
Tfb2m	-0.460214	1.92073e-11	2.74606e-10	DOWN
Hephl1	4.37854	1.95969e-11	2.79953e-10	UP
Pmpca	-0.485033	1.96819e-11	2.80945e-10	DOWN
Nceh1	-0.490085	1.97071e-11	2.81081e-10	DOWN
Uqcrc1	-0.692963	1.98629e-11	2.83077e-10	DOWN
Dynll1	0.868983	2.00591e-11	2.85647e-10	UP
Tmem8	-0.702229	2.0237e-11	2.87953e-10	DOWN
Fyb	1.19164	2.03926e-11	2.89937e-10	UP
Lrrc75a	0.817766	2.06117e-11	2.92819e-10	UP
Fjx1	1.56904	2.06824e-11	2.93592e-10	UP
Hdlbp	-0.661194	2.08171e-11	2.9527e-10	DOWN
Lrrc15	-1.10266	2.11227e-11	2.99368e-10	DOWN
Rbl2	-0.436569	2.11496e-11	2.99514e-10	DOWN
Rhoj	0.668354	2.14065e-11	3.02912e-10	UP
Cdr2l	0.96158	2.18021e-11	3.08268e-10	UP
Ikbip	0.638023	2.20667e-11	3.11764e-10	UP
Baalc	1.14148	2.21185e-11	3.1225e-10	UP
Lrrfip1	0.470218	2.24963e-11	3.17334e-10	UP
Sh3rf3	1.14376	2.25728e-11	3.18163e-10	UP
Far1	0.54431	2.28737e-11	3.22151e-10	UP
Eno3	-0.632287	2.30808e-11	3.24813e-10	DOWN
Vasn	0.691496	2.35451e-11	3.31087e-10	UP
Adgre1	1.05104	2.39312e-11	3.36254e-10	UP
Fastkd1	-0.445089	2.40941e-11	3.38019e-10	DOWN
Ndufv2	-0.574504	2.40945e-11	3.38019e-10	DOWN
Myh6	-0.767194	2.42378e-11	3.39765e-10	DOWN
Abcb8	-0.589402	2.52547e-11	3.53743e-10	DOWN
H2-Ke6	-0.653432	2.55807e-11	3.5803e-10	DOWN
Osbp2	-0.977001	2.56592e-11	3.58849e-10	DOWN
Sphk1	1.75727	2.59666e-11	3.62866e-10	UP
Ccdc85c	-0.630919	2.67255e-11	3.7318e-10	DOWN
Bub1	2.26304	2.69698e-11	3.76299e-10	UP
Irf5	1.02076	2.71855e-11	3.79014e-10	UP
Kbtbd3	-0.568045	2.7827e-11	3.87656e-10	DOWN
P2rx7	0.93782	2.83656e-11	3.94853e-10	UP
Rxrg	-0.757446	2.85819e-11	3.9732e-10	DOWN
Ly86	1.35862	2.8587e-11	3.9732e-10	UP
Hmgn3	1.04594	2.88367e-11	4.0048e-10	UP
Mpc2	-0.685072	2.95748e-11	4.10413e-10	DOWN
Cybc1	0.63777	2.98818e-11	4.14354e-10	UP
Rp1	-1.80555	3.04538e-11	4.21959e-10	DOWN
Mterf2	-0.613345	3.06009e-11	4.2367e-10	DOWN
Slfn2	0.824667	3.0765e-11	4.25614e-10	UP
Adam22	-0.592291	3.21798e-11	4.44844e-10	DOWN
Ccnb2	1.63017	3.24246e-11	4.47884e-10	UP
Rit1	-0.550982	3.2749e-11	4.52016e-10	DOWN
BC025920	-0.938498	3.27749e-11	4.52027e-10	DOWN
Shc2	1.06721	3.28097e-11	4.52159e-10	UP
Foxo6	-1.55614	3.30156e-11	4.54647e-10	DOWN
Nuf2	2.13472	3.34247e-11	4.59928e-10	UP
Gm11627	1.24103	3.41071e-11	4.6896e-10	UP
Spred3	1.29973	3.44215e-11	4.7292e-10	UP
Napsa	1.68197	3.47556e-11	4.77145e-10	UP
Spryd7	-0.538802	3.499e-11	4.79997e-10	DOWN
Zfyve28	1.45075	3.5207e-11	4.82604e-10	UP
Scn1b	0.838434	3.55981e-11	4.87593e-10	UP
Dnajc12	-0.556461	3.57697e-11	4.89571e-10	DOWN
Tmem177	-0.700056	3.59252e-11	4.91324e-10	DOWN
Kars	-0.438131	3.6069e-11	4.92916e-10	DOWN
Myo1d	0.930657	3.61715e-11	4.93941e-10	UP
Dym	-0.595797	3.62658e-11	4.94561e-10	DOWN
Tmem150c	-1.0779	3.6272e-11	4.94561e-10	DOWN
Gpc6	1.01705	3.63174e-11	4.94804e-10	UP
Txlnb	-0.721269	3.64379e-11	4.96069e-10	DOWN
Samm50	-0.547286	3.65782e-11	4.97602e-10	DOWN
Fam20b	-0.380821	3.70467e-11	5.03594e-10	DOWN
Sdhb	-0.677862	3.76491e-11	5.11395e-10	DOWN
Mmadhc	-0.47795	3.82114e-11	5.18641e-10	DOWN
Stum	-1.32234	3.82782e-11	5.19155e-10	DOWN
Rasl2-9	-0.809434	3.84601e-11	5.21228e-10	DOWN
Cd300c2	1.70321	3.87002e-11	5.24088e-10	UP
Anxa4	0.692347	3.94193e-11	5.33423e-10	UP
Depdc1a	2.47957	3.94925e-11	5.34011e-10	UP
Chodl	3.44113	3.9638e-11	5.35576e-10	UP
C1qb	0.928557	3.9892e-11	5.38602e-10	UP
Ripk1	0.474135	4.03149e-11	5.43903e-10	UP
Grin3b	-0.855466	4.05966e-11	5.47292e-10	DOWN
Mmachc	-0.502393	4.16789e-11	5.61462e-10	DOWN
Mfap3l	-0.625659	4.24123e-11	5.70912e-10	DOWN
Hspa9	-0.536041	4.43027e-11	5.95913e-10	DOWN
Krt80	0.96474	4.456e-11	5.98924e-10	UP
Pex11a	-0.68061	4.48308e-11	6.02009e-10	DOWN
Cda	1.56562	4.48565e-11	6.02009e-10	UP
Il7r	1.85839	4.5166e-11	6.0571e-10	UP
Vdac3	-0.458403	4.53035e-11	6.07101e-10	DOWN
Immt	-0.497165	4.5799e-11	6.13283e-10	DOWN
Enah	0.783019	4.77559e-11	6.39011e-10	UP
Junb	1.12091	4.86029e-11	6.4986e-10	UP
Mcee	-0.686183	4.93756e-11	6.59701e-10	DOWN
Dock10	0.805354	4.97599e-11	6.64341e-10	UP
Tmem184c	0.460403	4.99634e-11	6.66562e-10	UP
Cnn1	1.33559	5.0141e-11	6.68434e-10	UP
Traf1	1.34812	5.08228e-11	6.77022e-10	UP
Pcolce2	0.724181	5.14196e-11	6.84464e-10	UP
Myef2	0.574582	5.16889e-11	6.87539e-10	UP
Tlr4	0.837426	5.1738e-11	6.87682e-10	UP
Nt5c	0.715708	5.3745e-11	7.1383e-10	UP
Mtg2	-0.788771	5.45715e-11	7.24273e-10	DOWN
Aox1	-0.863137	5.57036e-11	7.38751e-10	DOWN
Kifc1	1.62442	5.59721e-11	7.41764e-10	UP
Cip2a	0.920247	5.6417e-11	7.47109e-10	UP
Mtmr11	1.53365	5.66504e-11	7.49647e-10	UP
Cd99l2	-0.341954	5.7563e-11	7.61162e-10	DOWN
Mcemp1	3.0011	5.7923e-11	7.6536e-10	UP
Gm49486	-1.02884	5.79814e-11	7.65568e-10	DOWN
Ndufs3	-0.637436	5.86525e-11	7.7386e-10	DOWN
Mlana	3.80112	5.9208e-11	7.80615e-10	UP
Gas6	0.484885	5.99696e-11	7.90077e-10	UP
Ecsit	-0.608747	6.02995e-11	7.93841e-10	DOWN
Mlph	1.21098	6.03898e-11	7.94446e-10	UP
Clec4a3	1.07703	6.06847e-11	7.97742e-10	UP
Dlg4	0.864721	6.0825e-11	7.99001e-10	UP
Dtnbp1	-0.577788	6.18058e-11	8.11291e-10	DOWN
Prx	0.860973	6.28216e-11	8.24023e-10	UP
Bmp2k	0.469323	6.46998e-11	8.48039e-10	UP
Art5	-1.02146	6.47544e-11	8.48136e-10	DOWN
Cd48	1.14952	6.50034e-11	8.50777e-10	UP
Bcl2a1d	2.38289	6.60656e-11	8.64049e-10	UP
Lgi2	1.11969	6.6865e-11	8.73869e-10	UP
Slc49a4	-0.442657	6.80438e-11	8.88628e-10	DOWN
Twf1	0.636515	6.87416e-11	8.97087e-10	UP
Tti1	-0.434278	6.89706e-11	8.99422e-10	DOWN
Arpc5	0.682335	7.0105e-11	9.13552e-10	UP
Hebp2	1.32051	7.02824e-11	9.152e-10	UP
Rab3a	-0.717836	7.11175e-11	9.25403e-10	DOWN
Il10rb	-0.407579	7.19244e-11	9.35226e-10	DOWN
Slc5a1	-1.64299	7.22641e-11	9.38799e-10	DOWN
Tmem52	-1.72874	7.23038e-11	9.38799e-10	DOWN
2410137M14Rik	-1.75052	7.23763e-11	9.39062e-10	DOWN
Cox15	-0.426837	7.24875e-11	9.39825e-10	DOWN
Rab8b	0.591066	7.26044e-11	9.40662e-10	UP
Ptprn	0.801764	7.31485e-11	9.47027e-10	UP
Fbxl19	0.608815	7.32025e-11	9.47044e-10	UP
E2f1	1.41458	7.61303e-11	9.84213e-10	UP
Cyp4v3	0.750958	8.06056e-11	1.04132e-09	UP
6820408C15Rik	-0.766485	8.23028e-11	1.06248e-09	DOWN
Brsk1	1.09671	8.33858e-11	1.07569e-09	UP
Isca1	-0.520573	8.56962e-11	1.10421e-09	DOWN
Serf1	0.772107	8.57198e-11	1.10421e-09	UP
Fmc1	-0.706912	8.60009e-11	1.10704e-09	DOWN
Cd276	1.15715	8.62954e-11	1.11003e-09	UP
Golim4	0.53491	8.78882e-11	1.12971e-09	UP
Sbk1	-0.848682	8.984e-11	1.15398e-09	DOWN
Has1	2.42631	9.15543e-11	1.17515e-09	UP
Tmem43	0.663439	9.17721e-11	1.17711e-09	UP
Slc25a13	-0.489866	9.28571e-11	1.19017e-09	DOWN
Acod1	3.36467	9.3097e-11	1.1924e-09	UP
Ndufs7	-0.746675	9.41709e-11	1.20529e-09	DOWN
Actr8	-0.39722	9.66655e-11	1.23634e-09	DOWN
Src	0.924635	9.7187e-11	1.24213e-09	UP
Ndrg2	-0.497723	9.74632e-11	1.24477e-09	DOWN
Dab2	0.615441	9.76859e-11	1.24644e-09	UP
Gpr137c	-0.784133	9.77324e-11	1.24644e-09	DOWN
Kcnj5	-0.83126	9.90065e-11	1.26179e-09	DOWN
Snx20	1.11883	1.00643e-10	1.28174e-09	UP
Pex6	-0.683417	1.00976e-10	1.28506e-09	DOWN
Cyfip2	-0.652041	1.01059e-10	1.28521e-09	DOWN
Mex3a	1.37065	1.01931e-10	1.29539e-09	UP
Farp2	-0.695809	1.03369e-10	1.31272e-09	DOWN
Ndufab1	-0.598593	1.0429e-10	1.32349e-09	DOWN
Mlf1	-0.60727	1.05007e-10	1.33165e-09	DOWN
Pdhb	-0.528347	1.05175e-10	1.33265e-09	DOWN
Itih4	1.85786	1.05234e-10	1.33265e-09	UP
Ggct	-0.598554	1.08436e-10	1.37223e-09	DOWN
Rnd1	1.01996	1.13619e-10	1.4368e-09	UP
Paip2b	-0.51469	1.14272e-10	1.44404e-09	DOWN
Gtpbp1	-0.382362	1.15291e-10	1.45589e-09	DOWN
Diras2	1.52825	1.1573e-10	1.45964e-09	UP
D3Ertd751e	-0.59194	1.1575e-10	1.45964e-09	DOWN
Skap2	0.667901	1.18373e-10	1.49167e-09	UP
Gba	0.592793	1.19383e-10	1.50333e-09	UP
Bcr	0.648953	1.21153e-10	1.52456e-09	UP
Wwtr1	0.393819	1.21718e-10	1.53059e-09	UP
mt-Cytb	-0.544729	1.21832e-10	1.53096e-09	DOWN
Espl1	1.29823	1.21923e-10	1.53103e-09	UP
Abcg1	0.699356	1.22837e-10	1.54142e-09	UP
Lamb3	-0.850938	1.25685e-10	1.57606e-09	DOWN
Arsb	0.644816	1.27301e-10	1.59522e-09	UP
Gstz1	-0.442694	1.29303e-10	1.61917e-09	DOWN
Ube2b	-0.529644	1.29767e-10	1.62385e-09	DOWN
Camk2b	-0.79802	1.30678e-10	1.63411e-09	DOWN
Hectd2	0.872519	1.31669e-10	1.64536e-09	UP
Apbb1ip	1.09246	1.36815e-10	1.70847e-09	UP
Igfbp3	1.12291	1.38464e-10	1.72787e-09	UP
Got1	-0.670016	1.38842e-10	1.73138e-09	DOWN
Wdr54	1.07642	1.39172e-10	1.73429e-09	UP
Sirpb1c	3.21597	1.42149e-10	1.77016e-09	UP
Nucb2	1.08414	1.4315e-10	1.78139e-09	UP
Arg1	4.35584	1.50744e-10	1.87459e-09	UP
Lrrc61	-0.531501	1.52886e-10	1.89992e-09	DOWN
Idh3g	-0.677185	1.56306e-10	1.94107e-09	DOWN
Cox6a2	-0.762149	1.57306e-10	1.95214e-09	DOWN
Crip2	-0.529071	1.60864e-10	1.99492e-09	DOWN
Tnfrsf12a	1.45318	1.63231e-10	2.02286e-09	UP
Trim30d	0.757678	1.64392e-10	2.03585e-09	UP
Kcna7	-0.800618	1.65171e-10	2.04409e-09	DOWN
Canx	-0.515217	1.6595e-10	2.05231e-09	DOWN
Acox1	-0.458812	1.68803e-10	2.08617e-09	DOWN
Dld	-0.52646	1.71506e-10	2.11812e-09	DOWN
Mtfr1	-0.541405	1.72167e-10	2.12481e-09	DOWN
Thy1	1.02068	1.73342e-10	2.13784e-09	UP
Pde1b	1.31527	1.78682e-10	2.20219e-09	UP
Lrtm1	-0.91041	1.79011e-10	2.20473e-09	DOWN
Tram2	0.935333	1.81348e-10	2.23199e-09	UP
Begain	1.74464	1.82903e-10	2.24959e-09	UP
Cyp1a1	-4.10157	1.8541e-10	2.27886e-09	DOWN
Pip4k2a	0.636102	1.87301e-10	2.30052e-09	UP
Celf4	1.11871	1.88826e-10	2.31767e-09	UP
Cxcl3	8.82764	1.90166e-10	2.33252e-09	UP
Naalad2	0.851619	1.93033e-10	2.36607e-09	UP
Cd28	-1.10839	1.94318e-10	2.3802e-09	DOWN
Kcnj14	0.940235	2.02284e-10	2.47609e-09	UP
Alkbh7	-0.661911	2.07799e-10	2.54186e-09	DOWN
Stat5b	-0.503865	2.08284e-10	2.54605e-09	DOWN
Urod	-0.51626	2.11009e-10	2.57762e-09	DOWN
Pabpc1	0.615624	2.1356e-10	2.607e-09	UP
Prmt2	0.579335	2.18506e-10	2.66556e-09	UP
Asb10	-0.842407	2.22472e-10	2.7121e-09	DOWN
Mgat2	0.477635	2.25747e-10	2.75016e-09	UP
Cenpf	-1.60482	2.26754e-10	2.76056e-09	DOWN
Spg21	0.538918	2.3106e-10	2.81107e-09	UP
Nampt	-1.06925	2.32329e-10	2.82459e-09	DOWN
Asrgl1	-0.482905	2.40238e-10	2.91878e-09	DOWN
Cacfd1	-0.527623	2.40529e-10	2.92034e-09	DOWN
Osbpl1a	-0.41386	2.43063e-10	2.94911e-09	DOWN
Abca12	-1.38548	2.43598e-10	2.95361e-09	DOWN
Mob3c	0.626354	2.48355e-10	3.00925e-09	UP
Dnaja3	-0.513247	2.48578e-10	3.00953e-09	DOWN
Aldh1l2	-1.08945	2.48713e-10	3.00953e-09	DOWN
Intu	-0.884812	2.48884e-10	3.00957e-09	DOWN
Csnk1g3	0.428113	2.51292e-10	3.03664e-09	UP
Maf1	-0.472928	2.54255e-10	3.07038e-09	DOWN
Mrpl50	-0.555605	2.5635e-10	3.09361e-09	DOWN
Clip3	1.09322	2.58543e-10	3.11797e-09	UP
Smim19	-0.530745	2.65384e-10	3.19833e-09	DOWN
Alox5	-0.960574	2.68464e-10	3.23328e-09	DOWN
mt-Nd4l	-0.593691	2.71829e-10	3.2716e-09	DOWN
Eif1a	0.716883	2.72181e-10	3.27365e-09	UP
Uqcrc2	-0.531463	2.73006e-10	3.28137e-09	DOWN
2210011C24Rik	-1.11724	2.76544e-10	3.32167e-09	DOWN
Celsr2	-1.00384	2.80911e-10	3.37187e-09	DOWN
Klhl21	-0.641983	2.87143e-10	3.44437e-09	DOWN
Anxa5	0.583743	2.88821e-10	3.46219e-09	UP
S1pr5	-1.38142	2.93506e-10	3.516e-09	DOWN
Echdc3	-0.804685	2.96958e-10	3.55498e-09	DOWN
Ttc19	-0.476727	3.05566e-10	3.6556e-09	DOWN
Spc24	-0.947909	3.1767e-10	3.79787e-09	DOWN
Twnk	-0.597428	3.24135e-10	3.87258e-09	DOWN
Muc1	1.38355	3.24925e-10	3.87944e-09	UP
Wdtc1	-0.605394	3.27658e-10	3.90842e-09	DOWN
Mia2	-0.532613	3.27788e-10	3.90842e-09	DOWN
Timm29	-0.462255	3.32501e-10	3.96199e-09	DOWN
Hexb	0.847204	3.3383e-10	3.97519e-09	UP
Tfpi2	1.11588	3.42853e-10	4.07993e-09	UP
Gm14443	-0.817367	3.43956e-10	4.09035e-09	DOWN
Zfp970	-1.03512	3.45125e-10	4.10153e-09	DOWN
Itgb7	1.39336	3.46639e-10	4.1168e-09	UP
Lpin1	-0.667375	3.48525e-10	4.13646e-09	DOWN
Atp5b	-0.559904	3.51609e-10	4.1703e-09	DOWN
Mmp3	1.21631	3.56727e-10	4.22822e-09	UP
Trim7	-0.923317	3.59528e-10	4.25861e-09	DOWN
Trem1	3.39553	3.70187e-10	4.38197e-09	UP
Atp5h	-0.569182	3.75658e-10	4.4438e-09	DOWN
Gmps	-0.308135	3.81067e-10	4.50482e-09	DOWN
Cnksr1	0.784721	3.91948e-10	4.6304e-09	UP
Usp2	-0.678713	3.95169e-10	4.66538e-09	DOWN
Cxcl16	1.10195	4.01474e-10	4.73671e-09	UP
Hsd17b4	-0.361875	4.01796e-10	4.7374e-09	DOWN
Gpr173	1.71605	4.02101e-10	4.73788e-09	UP
Lvrn	-1.29531	4.02961e-10	4.7449e-09	DOWN
Slc35b4	0.639608	4.04717e-10	4.76245e-09	UP
Kif2c	2.19856	4.0675e-10	4.78324e-09	UP
Slc7a1	-0.528888	4.08825e-10	4.8045e-09	DOWN
Cox7b	-0.59652	4.09236e-10	4.80619e-09	DOWN
Fech	-0.424854	4.0972e-10	4.80736e-09	DOWN
Nudt12	-0.802137	4.09986e-10	4.80736e-09	DOWN
Pcdhgc5	1.81323	4.102e-10	4.80736e-09	UP
Fam129a	0.77573	4.10407e-10	4.80736e-09	UP
Akr1b3	-0.556894	4.12174e-10	4.82491e-09	DOWN
Sdhd	-0.452168	4.13485e-10	4.8371e-09	DOWN
Ctsf	-0.460752	4.14577e-10	4.84672e-09	DOWN
Fundc2	-0.452759	4.15692e-10	4.85566e-09	DOWN
Rdh14	-0.469516	4.15883e-10	4.85566e-09	DOWN
Jak1	-0.520888	4.18367e-10	4.88149e-09	DOWN
Rac2	1.18691	4.20179e-10	4.89945e-09	UP
Sh3d19	0.774341	4.21314e-10	4.9095e-09	UP
Slc4a3	-0.73749	4.21759e-10	4.9115e-09	DOWN
Mettl23	-0.643777	4.2519e-10	4.94825e-09	DOWN
Il1rap	0.580649	4.29304e-10	4.99289e-09	UP
Casp4	1.10866	4.46668e-10	5.19147e-09	UP
P3h1	0.627387	4.60629e-10	5.35027e-09	UP
Fut11	0.687267	4.6521e-10	5.39999e-09	UP
Wscd2	2.81223	4.67297e-10	5.42071e-09	UP
Ankrd9	-0.745628	4.69912e-10	5.44752e-09	DOWN
Rilpl1	-0.738193	4.74274e-10	5.4916e-09	DOWN
Pnpla8	-0.484592	4.74377e-10	5.4916e-09	DOWN
Rab11fip1	1.2876	4.74632e-10	5.4916e-09	UP
Armcx2	0.784706	4.88894e-10	5.65297e-09	UP
Mylk3	-0.687359	4.92715e-10	5.69039e-09	DOWN
Prss12	2.01947	4.92763e-10	5.69039e-09	UP
Mcam	0.764517	4.93151e-10	5.6912e-09	UP
Vegfb	-0.588876	4.97616e-10	5.73904e-09	DOWN
Parva	0.468668	5.15437e-10	5.94075e-09	UP
Podxl2	-0.538531	5.21133e-10	6.00255e-09	DOWN
Ccdc28a	-0.534105	5.21915e-10	6.00771e-09	DOWN
Aurka	1.44593	5.22331e-10	6.00865e-09	UP
Aco2	-0.527829	5.23256e-10	6.01543e-09	DOWN
Vdr	1.18764	5.28515e-10	6.072e-09	UP
Wdr19	0.96455	5.32126e-10	6.10959e-09	UP
Bcap29	-0.468985	5.37446e-10	6.16672e-09	DOWN
Dhodh	-0.605192	5.43427e-10	6.23136e-09	DOWN
Akt2	-0.541976	5.45229e-10	6.24804e-09	DOWN
Ppip5k2	-1.06263	5.47423e-10	6.26917e-09	DOWN
Tent5b	1.42475	5.50381e-10	6.29904e-09	UP
Cd37	1.02313	5.53011e-10	6.32511e-09	UP
Kcnv2	-2.56302	5.61527e-10	6.41842e-09	DOWN
Cbr1	-0.528711	5.73385e-10	6.5498e-09	DOWN
Adam9	0.508325	5.91455e-10	6.75191e-09	UP
Itgb4	1.09746	6.08254e-10	6.93927e-09	UP
Mapre1	0.372538	6.09899e-10	6.95363e-09	UP
Cnga3	-1.12669	6.15373e-10	7.01158e-09	DOWN
Rab23	0.905034	6.27896e-10	7.14973e-09	UP
Rasgef1a	1.21671	6.43601e-10	7.32391e-09	UP
Plp2	0.611561	6.48079e-10	7.3702e-09	UP
Dusp18	-0.771976	6.565e-10	7.46125e-09	DOWN
Mllt11	0.706721	6.64483e-10	7.54719e-09	UP
Kbtbd12	-0.907292	6.89994e-10	7.832e-09	DOWN
Drosha	-0.465451	6.94589e-10	7.87918e-09	DOWN
Hpse	1.21665	6.95445e-10	7.88391e-09	UP
Tuba1a	0.772309	6.96597e-10	7.89198e-09	UP
Tmem88b	0.756501	7.03473e-10	7.96486e-09	UP
Syt12	0.771208	7.07604e-10	8.00658e-09	UP
Pnck	-0.595361	7.10466e-10	8.0339e-09	DOWN
Clca3a2	3.01412	7.28454e-10	8.23213e-09	UP
Slc25a22	-0.751506	7.29774e-10	8.24186e-09	DOWN
Blk	1.048	7.36599e-10	8.31371e-09	UP
Vldlr	-0.707931	7.59183e-10	8.56322e-09	DOWN
Entpd2	0.761473	7.62221e-10	8.5921e-09	UP
Atp5g3	-0.550594	7.67871e-10	8.65035e-09	DOWN
Cd5l	3.6368	7.70749e-10	8.67733e-09	UP
Pdha1	-0.512039	7.74827e-10	8.71682e-09	DOWN
Cdca8	1.68433	7.75227e-10	8.71682e-09	UP
Arrb1	0.661639	8.06917e-10	9.06747e-09	UP
Sirpb1b	3.34808	8.1019e-10	9.09855e-09	UP
Rhbdd3	-0.524815	8.16493e-10	9.16361e-09	DOWN
Kctd10	0.42518	8.19356e-10	9.19e-09	UP
Coq3	-0.503557	8.24127e-10	9.23773e-09	DOWN
Ass1	1.02817	8.25994e-10	9.25289e-09	UP
Rps6ka5	-0.77675	8.32097e-10	9.31544e-09	DOWN
Nckap5l	0.764822	8.41973e-10	9.42013e-09	UP
Olfml1	1.05074	8.69615e-10	9.72334e-09	UP
Praf2	0.991707	8.72479e-10	9.74929e-09	UP
Cobll1	-0.674876	8.74756e-10	9.76865e-09	DOWN
Syngap1	0.768134	8.8452e-10	9.87155e-09	UP
Tfpi	-0.547549	8.85516e-10	9.87653e-09	DOWN
Rilp	-0.586655	8.87735e-10	9.89513e-09	DOWN
Milr1	1.32333	8.91043e-10	9.92584e-09	UP
Gab1	-0.462429	9.00567e-10	1.00257e-08	DOWN
Atp1a3	2.05854	9.02405e-10	1.00399e-08	UP
Nudt15	-0.6829	9.07015e-10	1.0085e-08	DOWN
Slc16a10	-0.709638	9.1166e-10	1.01304e-08	DOWN
Irak4	0.5629	9.2153e-10	1.02337e-08	UP
Ears2	-0.578505	9.3424e-10	1.03685e-08	DOWN
Mrpl14	-0.756369	9.5348e-10	1.0566e-08	DOWN
Echdc2	-0.591396	9.53762e-10	1.0566e-08	DOWN
Tagln2	0.740081	9.53808e-10	1.0566e-08	UP
Mrps28	-0.61509	9.556e-10	1.05793e-08	DOWN
Arl4c	0.75783	9.67165e-10	1.07008e-08	UP
Mdh2	-0.560347	9.7585e-10	1.07902e-08	DOWN
Id4	1.45557	9.78245e-10	1.08101e-08	UP
Tmc6	0.572781	9.82079e-10	1.08457e-08	UP
Serpinb8	0.931728	9.95323e-10	1.09853e-08	UP
Clic1	0.825887	1.00055e-09	1.10362e-08	UP
Arhgap33	1.05416	1.01143e-09	1.11493e-08	UP
Ect2	1.52431	1.01667e-09	1.12002e-08	UP
Olfml3	0.967346	1.02296e-09	1.12626e-08	UP
Rapsn	-0.678947	1.03295e-09	1.13656e-08	DOWN
Slc27a1	-0.75993	1.0423e-09	1.14615e-08	DOWN
Nuak1	0.905942	1.043e-09	1.14621e-08	UP
Acad8	-0.485984	1.04397e-09	1.14658e-08	DOWN
Gpld1	-0.662889	1.07246e-09	1.17649e-08	DOWN
Nmral1	0.735474	1.07251e-09	1.17649e-08	UP
Acads	-0.677253	1.08102e-09	1.18509e-08	DOWN
Tshz3	0.783356	1.08856e-09	1.19263e-08	UP
Mettl17	-0.63807	1.0944e-09	1.1983e-08	DOWN
Ltbp4	0.695596	1.09518e-09	1.19842e-08	UP
Muc15	3.37987	1.09746e-09	1.20018e-08	UP
Abcc3	0.986918	1.10508e-09	1.20779e-08	UP
Acot7	-0.524927	1.12597e-09	1.22987e-08	DOWN
Igfbp4	0.936292	1.12703e-09	1.23028e-08	UP
Tubgcp2	-0.376742	1.14513e-09	1.24928e-08	DOWN
Casp3	1.24204	1.15381e-09	1.25728e-08	UP
Iah1	0.643099	1.15387e-09	1.25728e-08	UP
Cyb5r3	0.628473	1.16002e-09	1.26322e-08	UP
Rpusd4	-0.517349	1.1632e-09	1.26532e-08	DOWN
Lingo1	1.70736	1.1635e-09	1.26532e-08	UP
Col28a1	1.16395	1.16406e-09	1.26532e-08	UP
Tppp	-0.595049	1.16818e-09	1.26902e-08	DOWN
C1s1	0.624834	1.17038e-09	1.27065e-08	UP
Kcnk3	-0.677354	1.18667e-09	1.28756e-08	DOWN
Otoa	2.80886	1.18866e-09	1.28893e-08	UP
Hdac3	-0.326933	1.1914e-09	1.29112e-08	DOWN
Akr7a5	-0.695948	1.23759e-09	1.34037e-08	DOWN
Scx	1.18108	1.2643e-09	1.36848e-08	UP
Grsf1	-0.394859	1.27688e-09	1.38126e-08	DOWN
Fam111a	0.839241	1.30118e-09	1.40639e-08	UP
Rin1	0.92355	1.30168e-09	1.40639e-08	UP
Tfam	-0.364	1.31134e-09	1.41598e-08	DOWN
Rnaseh2a	-0.463181	1.3141e-09	1.41811e-08	DOWN
Slc25a38	-0.625316	1.32276e-09	1.42659e-08	DOWN
Ccdc8	0.604601	1.32399e-09	1.42706e-08	UP
Fbln1	1.05814	1.32972e-09	1.43238e-08	UP
Arl11	1.23131	1.33169e-09	1.43364e-08	UP
Mpc1	-0.447353	1.3352e-09	1.43657e-08	DOWN
Ifi30	0.882437	1.33819e-09	1.43891e-08	UP
C1qtnf4	-0.896228	1.35133e-09	1.45217e-08	DOWN
Mrps9	-0.564345	1.35277e-09	1.45285e-08	DOWN
Dlst	-0.51727	1.40533e-09	1.5084e-08	DOWN
Naprt	-0.41325	1.40668e-09	1.50895e-08	DOWN
Reep1	-0.660064	1.45404e-09	1.55882e-08	DOWN
Acp6	-0.565548	1.47379e-09	1.57905e-08	DOWN
Spata6	0.606354	1.47877e-09	1.58344e-08	UP
Hlf	-0.918535	1.54385e-09	1.65214e-08	DOWN
Mfn1	-0.497252	1.547e-09	1.65452e-08	DOWN
Zfhx4	1.2832	1.56206e-09	1.66964e-08	UP
Bace2	0.89593	1.6044e-09	1.71388e-08	UP
Rtn4ip1	-0.595793	1.60927e-09	1.71805e-08	DOWN
Tlr8	0.907277	1.63187e-09	1.74115e-08	UP
Sh3bgrl	0.678477	1.65528e-09	1.76508e-08	UP
Ptpn3	-0.63388	1.66166e-09	1.77083e-08	DOWN
Cybb	1.23964	1.66318e-09	1.77114e-08	UP
Chst12	1.1217	1.66393e-09	1.77114e-08	UP
Nrd1	-0.388057	1.68399e-09	1.79144e-08	DOWN
Fbxo21	-0.451379	1.68791e-09	1.79449e-08	DOWN
Fhdc1	1.997	1.68886e-09	1.79449e-08	UP
Psap	-0.478878	1.72812e-09	1.83511e-08	DOWN
Tnnt1	-0.645359	1.73826e-09	1.8448e-08	DOWN
Slc16a7	-0.864876	1.74934e-09	1.85462e-08	DOWN
Prss46	4.98052	1.74959e-09	1.85462e-08	UP
Hmox1	0.792954	1.75711e-09	1.8615e-08	UP
Crb1	-1.43525	1.77016e-09	1.87422e-08	DOWN
Tars2	-0.451709	1.79113e-09	1.8953e-08	DOWN
Elovl1	0.625089	1.82383e-09	1.92877e-08	UP
Prxl2c	-0.336789	1.84876e-09	1.95399e-08	DOWN
Unc5b	1.17873	1.89462e-09	2.00128e-08	UP
Sec31b	-0.87494	1.8975e-09	2.00271e-08	DOWN
Dlg5	0.631524	1.89821e-09	2.00271e-08	UP
Slfn1	1.62234	1.90282e-09	2.0064e-08	UP
Fam83d	2.12264	1.90421e-09	2.00668e-08	UP
Itgb1	0.391549	1.9074e-09	2.00887e-08	UP
Pcdhb17	0.607581	1.93371e-09	2.03538e-08	UP
Pramef12	4.61747	1.9356e-09	2.03618e-08	UP
Abcb10	-0.453319	1.96672e-09	2.0677e-08	DOWN
Amy1	-1.04958	1.97886e-09	2.07925e-08	DOWN
S1pr2	1.2025	2.02092e-09	2.1222e-08	UP
Sh3rf2	-0.824867	2.05309e-09	2.15473e-08	DOWN
Ndufa9	-0.603516	2.07283e-09	2.17417e-08	DOWN
Ptpn6	0.995218	2.07688e-09	2.1756e-08	UP
Flad1	-0.474719	2.07714e-09	2.1756e-08	DOWN
Clpb	-0.533496	2.07783e-09	2.1756e-08	DOWN
Aff3	1.23265	2.08315e-09	2.1799e-08	UP
Eif4ebp2	-0.386699	2.10253e-09	2.1989e-08	DOWN
Pdzd7	8.64416	2.12029e-09	2.21618e-08	UP
Gmip	0.882053	2.12387e-09	2.21864e-08	UP
Ptger3	3.60535	2.14628e-09	2.24074e-08	UP
Myl3	-0.516514	2.15784e-09	2.2515e-08	DOWN
Ptk2b	0.872919	2.16784e-09	2.26062e-08	UP
Mrpl28	-0.624049	2.17086e-09	2.26245e-08	DOWN
C5ar1	0.85568	2.19287e-09	2.28407e-08	UP
Ugt1a6a	2.13234	2.20929e-09	2.29984e-08	UP
Thap4	-0.661527	2.21084e-09	2.30011e-08	DOWN
Gfm2	-0.426948	2.21826e-09	2.30651e-08	DOWN
Mthfd2	1.51317	2.2294e-09	2.31675e-08	UP
Tro	1.19957	2.24031e-09	2.32674e-08	UP
Tmem179	-1.16919	2.26387e-09	2.34984e-08	DOWN
Got2	-0.524319	2.2652e-09	2.34986e-08	DOWN
Col4a6	1.25497	2.26702e-09	2.3504e-08	UP
Fsd2	-0.649394	2.27474e-09	2.35704e-08	DOWN
Zbtb9	1.84446	2.28647e-09	2.36783e-08	UP
Pacsin1	1.47491	2.35197e-09	2.43314e-08	UP
Mrpl37	-0.555026	2.35225e-09	2.43314e-08	DOWN
Cd59a	-0.454846	2.37389e-09	2.45411e-08	DOWN
Trdn	-0.511589	2.38162e-09	2.45939e-08	DOWN
Plxdc2	0.708343	2.38174e-09	2.45939e-08	UP
Prg4	0.973535	2.3957e-09	2.47239e-08	UP
Cd209a	1.83012	2.40114e-09	2.47658e-08	UP
Slc35b3	0.663616	2.467e-09	2.54305e-08	UP
Ddo	-0.596516	2.54562e-09	2.62258e-08	DOWN
Pomgnt2	-0.408891	2.57199e-09	2.64823e-08	DOWN
Map11	0.743323	2.57501e-09	2.64983e-08	UP
Ak1	-0.488586	2.59767e-09	2.67161e-08	DOWN
Slc2a13	1.56149	2.62291e-09	2.69603e-08	UP
Fkbp1b	1.31505	2.64014e-09	2.71219e-08	UP
Lag3	1.07783	2.64422e-09	2.71482e-08	UP
Tiam2	0.9047	2.66623e-09	2.73586e-08	UP
Cald1	0.649019	2.68172e-09	2.75018e-08	UP
Ccnd2	0.371323	2.72149e-09	2.78937e-08	UP
Serpinb9b	2.39782	2.72729e-09	2.79373e-08	UP
Cmklr1	0.708869	2.73201e-09	2.79696e-08	UP
Mapk11	0.555459	2.74062e-09	2.80417e-08	UP
Uggt1	-0.409042	2.77012e-09	2.83274e-08	DOWN
Igsf3	0.624367	2.77388e-09	2.83498e-08	UP
Atp5o	-0.599556	2.78837e-09	2.84687e-08	DOWN
Fars2	-0.599352	2.78868e-09	2.84687e-08	DOWN
Sc5d	-0.435168	2.79556e-09	2.85227e-08	DOWN
Dcaf4	-0.585135	2.80015e-09	2.85533e-08	DOWN
Cdh4	-0.926536	2.83768e-09	2.89195e-08	DOWN
Gstp1	-0.531345	2.84711e-09	2.89992e-08	DOWN
Wfdc1	-0.573092	2.85814e-09	2.9095e-08	DOWN
Gas7	0.840616	2.86324e-09	2.91304e-08	UP
Adgra1	2.4342	2.87137e-09	2.91966e-08	UP
Ndufs4	-0.655036	2.88922e-09	2.93615e-08	DOWN
Axl	0.698321	2.90133e-09	2.946e-08	UP
Lmna	0.487137	2.9022e-09	2.946e-08	UP
Cdca3	1.86321	2.93404e-09	2.97664e-08	UP
Iars2	-0.376228	2.9426e-09	2.98364e-08	DOWN
Drp2	1.30432	2.95e-09	2.98945e-08	UP
Myl6b	0.947939	2.99092e-09	3.02921e-08	UP
Mdfic	0.702073	3.04592e-09	3.08318e-08	UP
Gabrb3	1.49776	3.09835e-09	3.13448e-08	UP
Krt8	2.45828	3.11083e-09	3.14533e-08	UP
Chchd3	-0.545821	3.15811e-09	3.19033e-08	DOWN
Dars2	-0.749065	3.15888e-09	3.19033e-08	DOWN
Ggnbp1	-0.655697	3.20495e-09	3.23504e-08	DOWN
Tsc2	-0.401561	3.21664e-09	3.24501e-08	DOWN
Cyp2s1	2.25889	3.22998e-09	3.25664e-08	UP
Cox7c	-0.545251	3.30773e-09	3.33316e-08	DOWN
Tnfaip8	-0.648453	3.32267e-09	3.34634e-08	DOWN
Zfp354c	1.10255	3.3285e-09	3.34927e-08	UP
Atp6v0d2	2.61806	3.32931e-09	3.34927e-08	UP
Pld4	0.937406	3.33676e-09	3.35488e-08	UP
Pcdhb16	0.720404	3.43812e-09	3.45486e-08	UP
Pla2g7	1.13534	3.44322e-09	3.45691e-08	UP
Shisa4	1.05095	3.44401e-09	3.45691e-08	UP
Zmat3	0.554828	3.54618e-09	3.55747e-08	UP
Eif4e3	-0.406543	3.55932e-09	3.56866e-08	DOWN
Ptgr2	-0.447935	3.61963e-09	3.62711e-08	DOWN
Apip	-0.599277	3.66338e-09	3.6689e-08	DOWN
Sell	1.32648	3.6678e-09	3.67128e-08	UP
Agtr1a	-0.658294	3.69491e-09	3.69635e-08	DOWN
Epha3	2.31239	3.7353e-09	3.73468e-08	UP
Mtus2	-0.571964	3.81193e-09	3.80917e-08	DOWN
Htr2b	1.77551	3.83654e-09	3.83163e-08	UP
Ro60	0.487063	3.91109e-09	3.90392e-08	UP
Mpzl1	0.920524	3.9218e-09	3.91243e-08	UP
Fndc5	-0.800303	3.9293e-09	3.91774e-08	DOWN
Idh3a	-0.564633	4.03831e-09	4.02419e-08	DOWN
Clec18a	-2.21867	4.10303e-09	4.08642e-08	DOWN
Tnfrsf1a	0.710615	4.12162e-09	4.10266e-08	UP
Mcat	-0.525354	4.2153e-09	4.19359e-08	DOWN
Npepps	-0.349383	4.24315e-09	4.21895e-08	DOWN
Aifm1	-0.520417	4.29486e-09	4.268e-08	DOWN
Slc1a6	3.23795	4.35055e-09	4.32095e-08	UP
Foxred1	-0.52294	4.40584e-09	4.37344e-08	DOWN
Mcub	0.996603	4.46512e-09	4.42984e-08	UP
Acta1	2.57538	4.51298e-09	4.47485e-08	UP
Dmac2l	-0.506664	4.53293e-09	4.49215e-08	DOWN
Gatc	-0.416653	4.53571e-09	4.49243e-08	DOWN
Myl6	0.688991	4.56137e-09	4.51535e-08	UP
Tmem69	-0.499079	4.56991e-09	4.52131e-08	DOWN
Ccl17	3.55579	4.658e-09	4.60593e-08	UP
Rad23a	-0.466381	4.68636e-09	4.63142e-08	DOWN
Faf1	-0.444621	4.72087e-09	4.66296e-08	DOWN
Slc18a1	1.26678	4.7812e-09	4.71996e-08	UP
Prkar2a	-0.322845	4.84226e-09	4.7776e-08	DOWN
Pcx	-0.618611	4.86425e-09	4.79667e-08	DOWN
Arhgap30	0.815436	4.87191e-09	4.80159e-08	UP
Csdc2	-0.818809	4.93064e-09	4.8568e-08	DOWN
Diaph3	1.70468	4.95211e-09	4.87528e-08	UP
Crhr2	-0.784278	4.97618e-09	4.89629e-08	DOWN
Ackr1	1.87559	4.97993e-09	4.8973e-08	UP
Klc3	2.30184	4.98584e-09	4.90043e-08	UP
mt-Co1	-0.599191	5.00376e-09	4.91534e-08	DOWN
Lrig3	1.02298	5.01979e-09	4.9284e-08	UP
Pcgf2	0.92512	5.03414e-09	4.93978e-08	UP
Ndufa4	-0.549867	5.03893e-09	4.94178e-08	DOWN
Eda2r	0.717459	5.08139e-09	4.98071e-08	UP
Otulinl	1.52564	5.08574e-09	4.98225e-08	UP
Itga7	-0.315915	5.11294e-09	5.00617e-08	DOWN
Pfn4	-0.763071	5.12537e-09	5.0156e-08	DOWN
Lin52	-0.497454	5.25818e-09	5.14277e-08	DOWN
Slc25a34	-0.803538	5.28012e-09	5.16141e-08	DOWN
AB124611	1.22404	5.29596e-09	5.17407e-08	UP
Clec4a1	0.790143	5.32391e-09	5.19856e-08	UP
Bcl11b	-1.34299	5.3339e-09	5.20548e-08	DOWN
Prrt4	0.91812	5.37476e-09	5.24251e-08	UP
App	0.524071	5.39847e-09	5.26278e-08	UP
Fhl1	0.978801	5.4076e-09	5.26882e-08	UP
Phtf2	-0.366728	5.52899e-09	5.38417e-08	DOWN
Dchs2	1.39004	5.56752e-09	5.41728e-08	UP
Ddias	1.23819	5.56902e-09	5.41728e-08	UP
Greb1	0.982521	5.60581e-09	5.45011e-08	UP
Fchsd1	0.846286	5.61862e-09	5.45961e-08	UP
Gas1	0.989838	5.68811e-09	5.52414e-08	UP
Mthfd1	-0.357966	5.69203e-09	5.52496e-08	DOWN
Smpd2	-0.437876	5.76869e-09	5.59635e-08	DOWN
Mlxipl	-0.660819	5.78276e-09	5.60697e-08	DOWN
Qsox2	-0.758826	5.81957e-09	5.63961e-08	DOWN
Rragd	-0.468365	5.83535e-09	5.65185e-08	DOWN
Ugt1a6b	7.16428	5.89265e-09	5.70428e-08	UP
Cib3	-1.8194	5.95616e-09	5.76072e-08	DOWN
Stard10	-0.991011	5.95973e-09	5.76072e-08	DOWN
Acsl5	0.571565	5.96059e-09	5.76072e-08	UP
Tvp23a	1.13042	5.98655e-09	5.78271e-08	UP
Extl1	-0.555917	6.01477e-09	5.80684e-08	DOWN
Tmem173	1.05071	6.03793e-09	5.82606e-08	UP
Slc39a10	0.511436	6.08507e-09	5.8684e-08	UP
Pdlim3	1.00364	6.13958e-09	5.91779e-08	UP
Reep2	1.03903	6.20424e-09	5.97537e-08	UP
Gm15737	-1.63878	6.20597e-09	5.97537e-08	DOWN
Rab34	0.659314	6.2152e-09	5.98104e-08	UP
Lpar2	1.24844	6.23644e-09	5.99828e-08	UP
Dcaf6	-0.404093	6.26298e-09	6.02057e-08	DOWN
Dcaf8	-0.337598	6.42703e-09	6.17497e-08	DOWN
Tmbim1	0.439095	6.45599e-09	6.19948e-08	UP
Lonrf2	-0.592822	6.48817e-09	6.22705e-08	DOWN
Nudt6	-0.892886	6.50714e-09	6.24191e-08	DOWN
mt-Atp6	-0.520456	6.54396e-09	6.27389e-08	DOWN
Kctd17	0.936925	6.55625e-09	6.28231e-08	UP
Tmem205	-0.718808	6.6723e-09	6.3901e-08	DOWN
Irx2	-0.675766	6.68163e-09	6.39563e-08	DOWN
Ccnh	-0.458021	6.76158e-09	6.46871e-08	DOWN
Cd33	0.778896	6.78124e-09	6.48406e-08	UP
Akap2	0.632441	6.80278e-09	6.5012e-08	UP
Rhod	0.862498	6.82435e-09	6.51834e-08	UP
Mov10l1	-0.605212	6.84676e-09	6.53627e-08	DOWN
Trpt1	-0.553894	7.11486e-09	6.7886e-08	DOWN
Cyb5d2	-0.568037	7.23425e-09	6.89885e-08	DOWN
Sh3gl1	0.599981	7.25137e-09	6.91151e-08	UP
Serpine1	1.9039	7.32907e-09	6.98186e-08	UP
Gstp2	-0.794065	7.48202e-09	7.12379e-08	DOWN
Taco1	-0.503543	7.52908e-09	7.1648e-08	DOWN
Lamc1	0.586038	7.53752e-09	7.16903e-08	UP
Trip10	-0.548757	7.61871e-09	7.24241e-08	DOWN
Bcl3	0.947334	7.65949e-09	7.27732e-08	UP
Mb21d2	-0.517591	7.74552e-09	7.35518e-08	DOWN
Dact3	1.05356	7.7612e-09	7.36616e-08	UP
Ndufb4	-0.621375	7.8215e-09	7.41948e-08	DOWN
Fmr1	0.525955	7.83414e-09	7.42755e-08	UP
Mmp12	5.47295	7.89138e-09	7.47786e-08	UP
Kcnj3	-1.27081	7.94646e-09	7.52608e-08	DOWN
Txnrd2	-0.488237	8.02023e-09	7.59195e-08	DOWN
Dzip1l	0.758795	8.12052e-09	7.68284e-08	UP
Rps6ka2	-0.682661	8.18718e-09	7.74182e-08	DOWN
Egfr	0.940761	8.2459e-09	7.79324e-08	UP
Shisa5	0.737954	8.33372e-09	7.8721e-08	UP
Atl3	0.710368	8.40993e-09	7.93991e-08	UP
Epb41l2	0.529596	8.49279e-09	8.01393e-08	UP
Dis3l	-0.476966	8.76809e-09	8.26936e-08	DOWN
Vkorc1	0.787221	8.88602e-09	8.37618e-08	UP
Kdelc2	0.675405	8.98571e-09	8.46571e-08	UP
mt-Co3	-0.56921	9.05869e-09	8.52999e-08	DOWN
Nfasc	1.56249	9.09875e-09	8.56322e-08	UP
Rhobtb2	-0.466813	9.14899e-09	8.60599e-08	DOWN
Pgghg	0.906183	9.31756e-09	8.75997e-08	UP
Ddr1	0.572307	9.40893e-09	8.84125e-08	UP
Gpsm1	-0.562347	9.54935e-09	8.9685e-08	DOWN
Faap100	-0.448278	9.6449e-09	9.0535e-08	DOWN
Pigo	-0.513295	9.74793e-09	9.14543e-08	DOWN
Vwa8	-0.713661	9.77851e-09	9.16933e-08	DOWN
Ano4	-0.787527	9.82314e-09	9.20638e-08	DOWN
Elf4	0.707095	9.89613e-09	9.26994e-08	UP
Clec5a	1.27663	1.00284e-08	9.38891e-08	UP
Sv2b	1.09622	1.00891e-08	9.44081e-08	UP
Lynx1	-0.499422	1.01147e-08	9.45985e-08	DOWN
Slc39a11	0.653149	1.03245e-08	9.65108e-08	UP
Cnn3	0.616635	1.03387e-08	9.65928e-08	UP
Dguok	-0.506047	1.04162e-08	9.72663e-08	DOWN
Ifi27l2a	1.15059	1.04944e-08	9.79457e-08	UP
Khdrbs3	-0.486409	1.05591e-08	9.84986e-08	DOWN
Slc7a6	0.613628	1.05754e-08	9.85997e-08	UP
Clec12a	1.54937	1.06209e-08	9.89722e-08	UP
Fam149a	0.534927	1.07777e-08	1.00381e-07	UP
Gfm1	-0.52812	1.09668e-08	1.02045e-07	DOWN
Nap1l4	-0.38624	1.09677e-08	1.02045e-07	DOWN
C1qtnf7	0.986952	1.10153e-08	1.02435e-07	UP
Gdf3	2.77063	1.11176e-08	1.03333e-07	UP
Calr3	-0.699707	1.11448e-08	1.0351e-07	DOWN
Capn5	1.00167	1.11482e-08	1.0351e-07	UP
Siva1	-0.559923	1.1492e-08	1.06647e-07	DOWN
Eva1b	0.968676	1.15537e-08	1.07164e-07	UP
Ly9	2.36453	1.15603e-08	1.0717e-07	UP
Asphd2	1.08567	1.16475e-08	1.07923e-07	UP
Foxp2	1.10012	1.16708e-08	1.08083e-07	UP
P2ry6	0.907906	1.17465e-08	1.08727e-07	UP
Ust	0.74268	1.17827e-08	1.09006e-07	UP
Tmem273	1.65834	1.19285e-08	1.10299e-07	UP
Perm1	-0.610444	1.19649e-08	1.10578e-07	DOWN
Xk	-0.699388	1.19962e-08	1.10811e-07	DOWN
Uqcc1	-0.64745	1.20051e-08	1.10836e-07	DOWN
Rgs10	1.09336	1.20923e-08	1.11584e-07	UP
Cap1	0.57537	1.21887e-08	1.12415e-07	UP
Ccdc112	1.04358	1.22561e-08	1.12925e-07	UP
Arl3	-0.532573	1.22566e-08	1.12925e-07	DOWN
Ghr	-0.532765	1.22981e-08	1.1325e-07	DOWN
Nlrx1	-0.423556	1.23712e-08	1.13865e-07	DOWN
Gatb	-0.640095	1.24424e-08	1.14435e-07	DOWN
Myh10	0.660683	1.24459e-08	1.14435e-07	UP
Gas2l3	1.39541	1.25524e-08	1.15355e-07	UP
Mest	1.48594	1.27135e-08	1.16776e-07	UP
Npc1	-0.668082	1.28004e-08	1.17514e-07	DOWN
Clcf1	1.88564	1.28544e-08	1.17949e-07	UP
Ndufb9	-0.60088	1.29033e-08	1.18337e-07	DOWN
Oas3	1.14829	1.29441e-08	1.18651e-07	UP
Nubpl	-0.620993	1.29709e-08	1.18836e-07	DOWN
Tmem250-ps	-0.446529	1.30345e-08	1.19358e-07	DOWN
Slitrk4	1.2606	1.31188e-08	1.20069e-07	UP
Cd34	0.875443	1.31461e-08	1.20257e-07	UP
Pcdhb9	1.4471	1.32433e-08	1.21085e-07	UP
Scrn3	-0.37205	1.32867e-08	1.21419e-07	DOWN
Sntb2	0.596446	1.33201e-08	1.21663e-07	UP
Ndufa13	-0.614655	1.33638e-08	1.21981e-07	DOWN
Cep63	-0.539293	1.33685e-08	1.21981e-07	DOWN
5730455P16Rik	-0.470989	1.3405e-08	1.22251e-07	DOWN
Fcgr1	1.23558	1.34772e-08	1.22848e-07	UP
Selenom	0.600501	1.36654e-08	1.245e-07	UP
Timm21	-0.636865	1.37e-08	1.24752e-07	DOWN
Coro6	-0.492307	1.37762e-08	1.25375e-07	DOWN
Mrpl3	-0.475155	1.37824e-08	1.25375e-07	DOWN
Ulk3	0.573929	1.41742e-08	1.28874e-07	UP
Dennd1a	-0.353969	1.45316e-08	1.32057e-07	DOWN
Kank2	-0.298221	1.4591e-08	1.32529e-07	DOWN
Cd36	-0.490336	1.46761e-08	1.33235e-07	DOWN
Lsmem1	-0.758093	1.47104e-08	1.33479e-07	DOWN
Jph1	-0.614881	1.47911e-08	1.34143e-07	DOWN
Atad1	-0.410409	1.48017e-08	1.34172e-07	DOWN
Aldh7a1	-0.337416	1.49132e-08	1.35114e-07	DOWN
Tnnt2	-0.525157	1.50345e-08	1.36144e-07	DOWN
Syn1	1.12201	1.52502e-08	1.38028e-07	UP
Ada	1.06788	1.5414e-08	1.3944e-07	UP
Nfkbie	1.30559	1.5614e-08	1.41179e-07	UP
Lingo3	-1.27382	1.56251e-08	1.41208e-07	DOWN
Ccdc47	-0.41843	1.5653e-08	1.41389e-07	DOWN
Marco	3.78984	1.56952e-08	1.41699e-07	UP
Knl1	1.41563	1.58314e-08	1.42856e-07	UP
Ndufc1	-0.554294	1.6086e-08	1.45081e-07	DOWN
Tmem266	-0.857858	1.6366e-08	1.47532e-07	DOWN
Acyp2	-0.575915	1.6482e-08	1.48503e-07	DOWN
Adra2b	-0.957954	1.67184e-08	1.50558e-07	DOWN
Siae	-0.424042	1.70128e-08	1.53132e-07	DOWN
Nudt3	-0.458549	1.70328e-08	1.53235e-07	DOWN
Mfsd14b	0.381172	1.72581e-08	1.55185e-07	UP
Cfd	7.27535	1.72745e-08	1.55254e-07	UP
[truncated: 17,657 more rows]
