# Supplementary figures and images for: Integrative transcriptomic analysis of tissue-specific metabolic crosstalk after myocardial infarction
Source: eLife journal article supplement (doi:10.7554/elife.66921), 2021-05-10

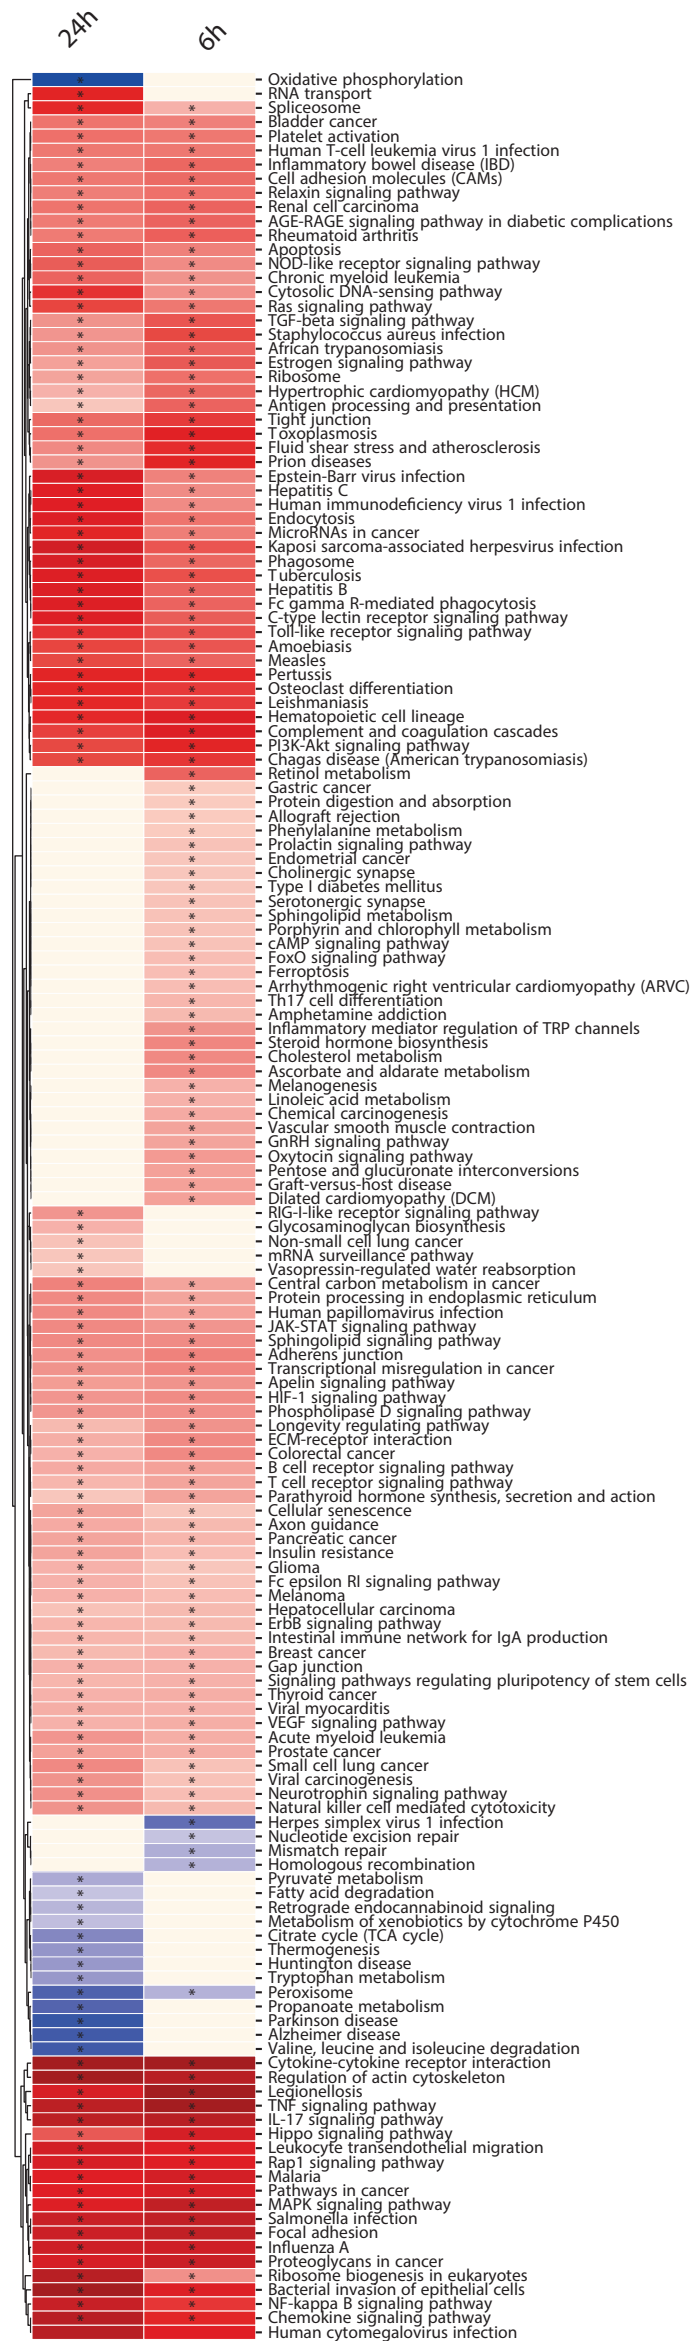

KEGG pathway analysis results for Heart 6- and 24- hours post MI

Supplement: supp [file elife-66921-supp-v1.zip]
